# Supplementary material for: The role of children in the spread of COVID-19: Using household data from Bnei Brak, Israel, to estimate the relative susceptibility and infectivity of children
Source: PubMed Central journal article supplement (PMC7877572; doi:10.1371/journal.pcbi.1008559), 2021-02-11

# Household 1

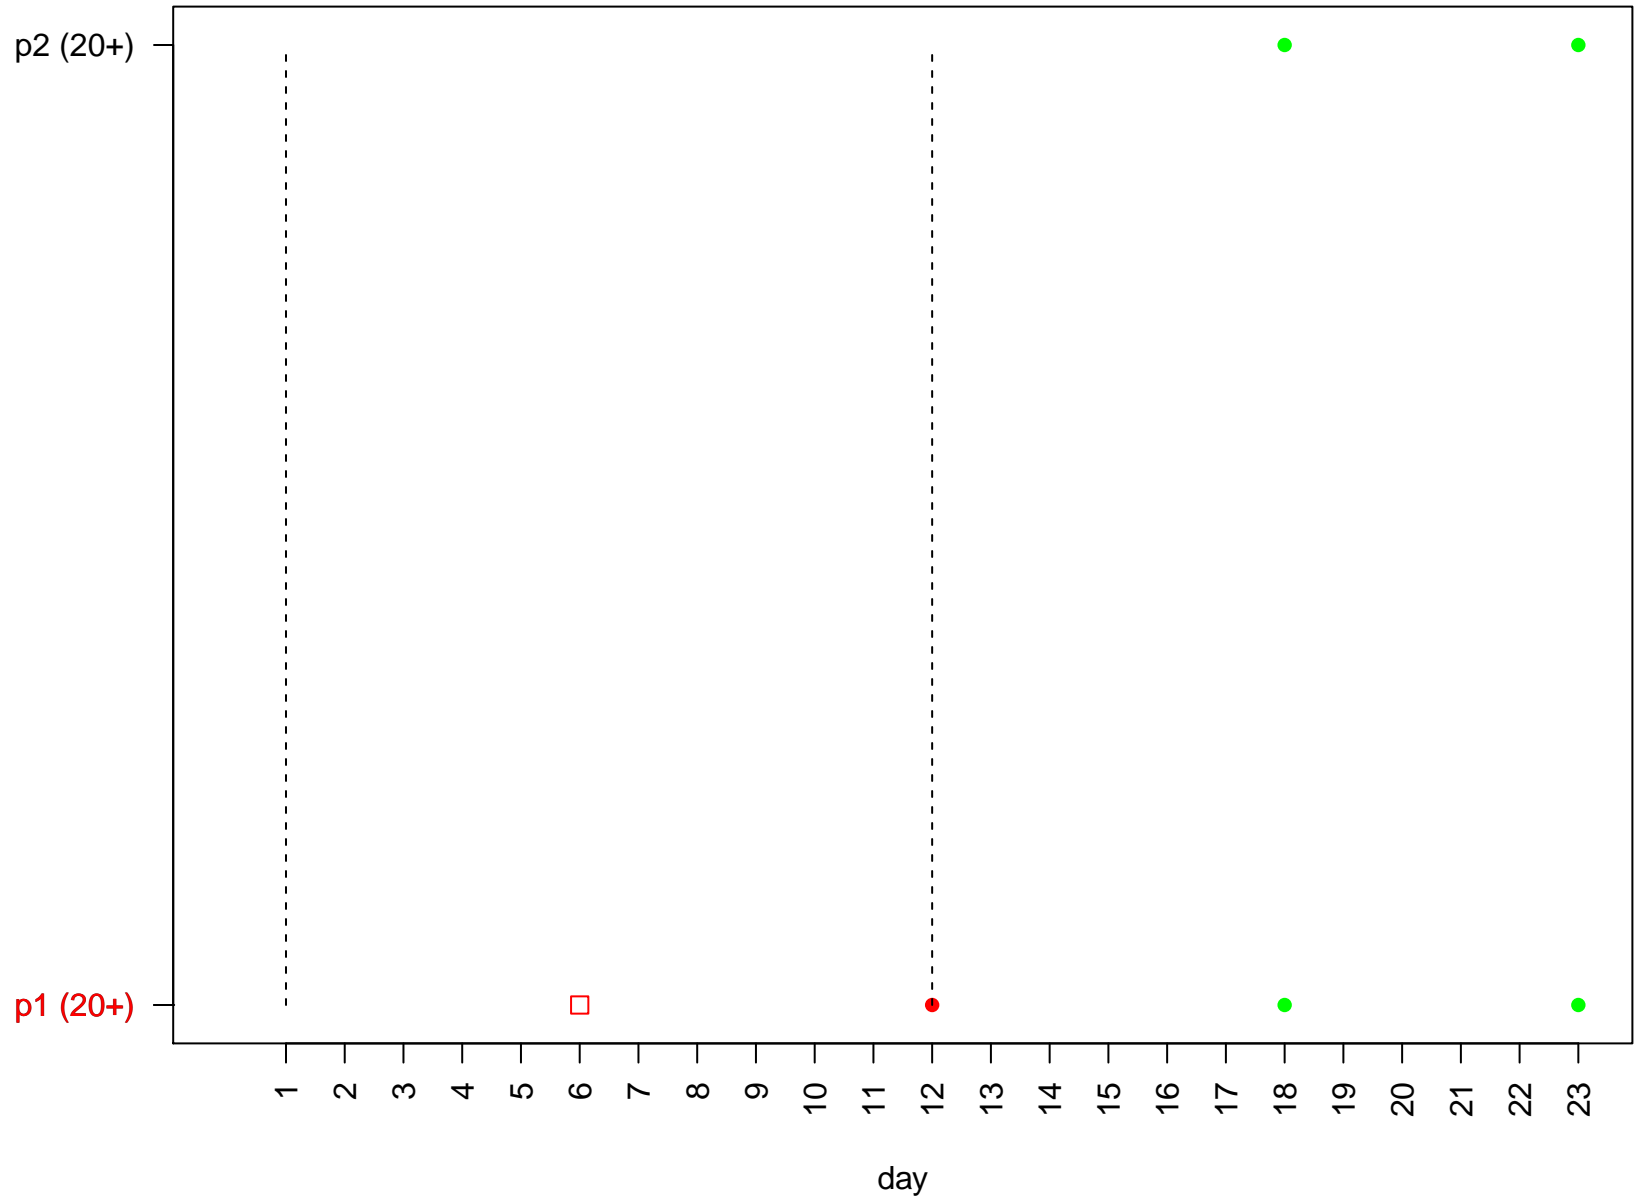

# Household 2

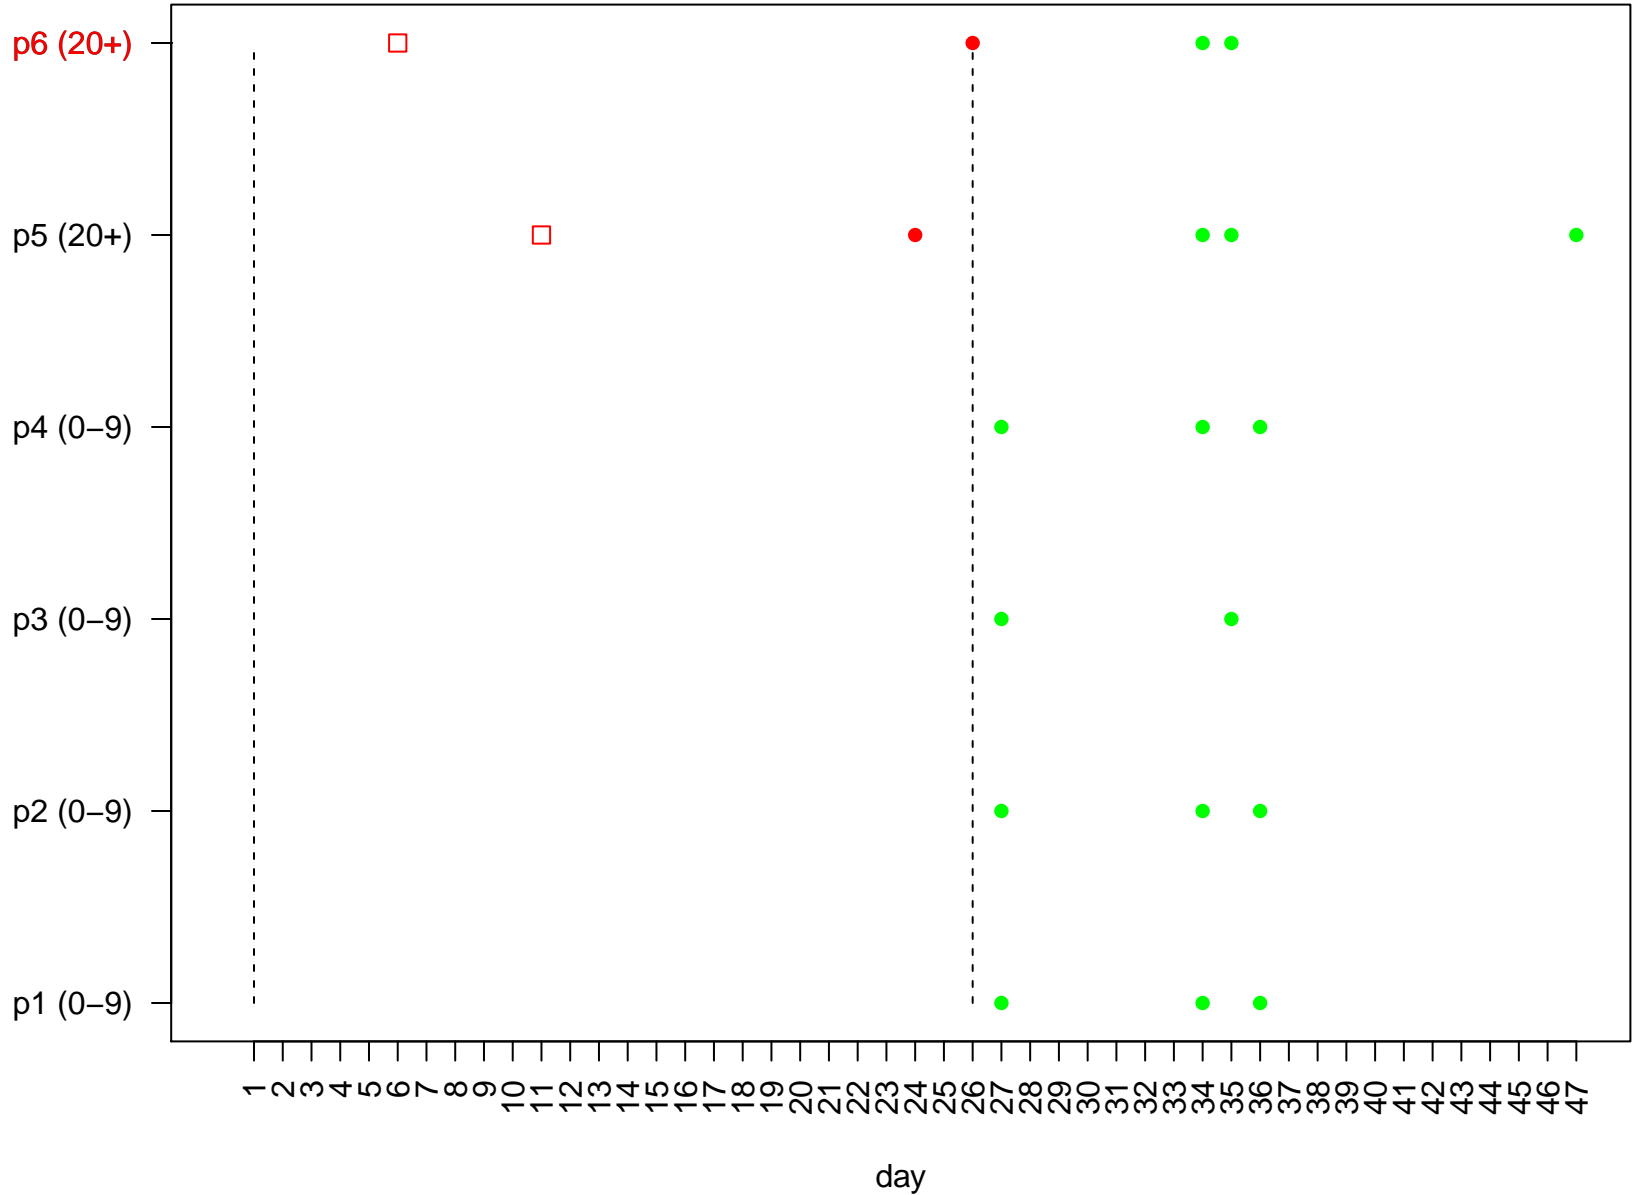

# Household 3

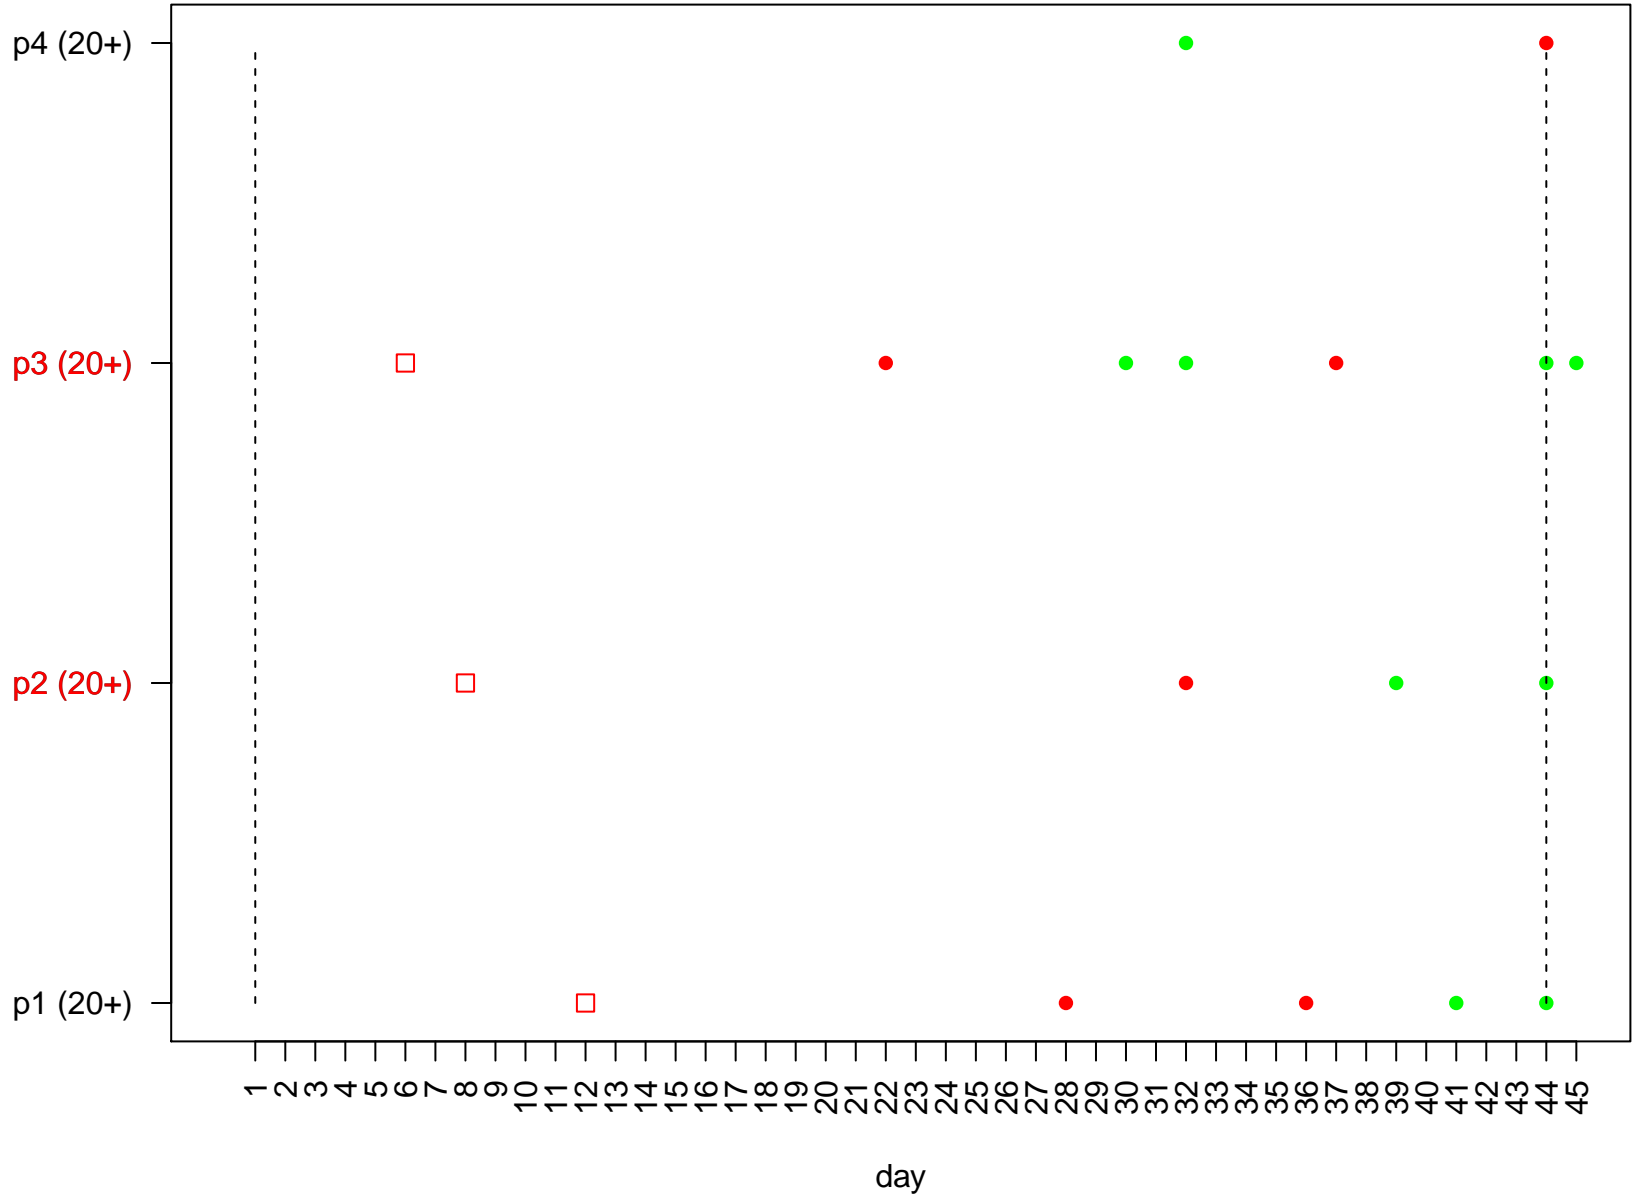



# Household 5

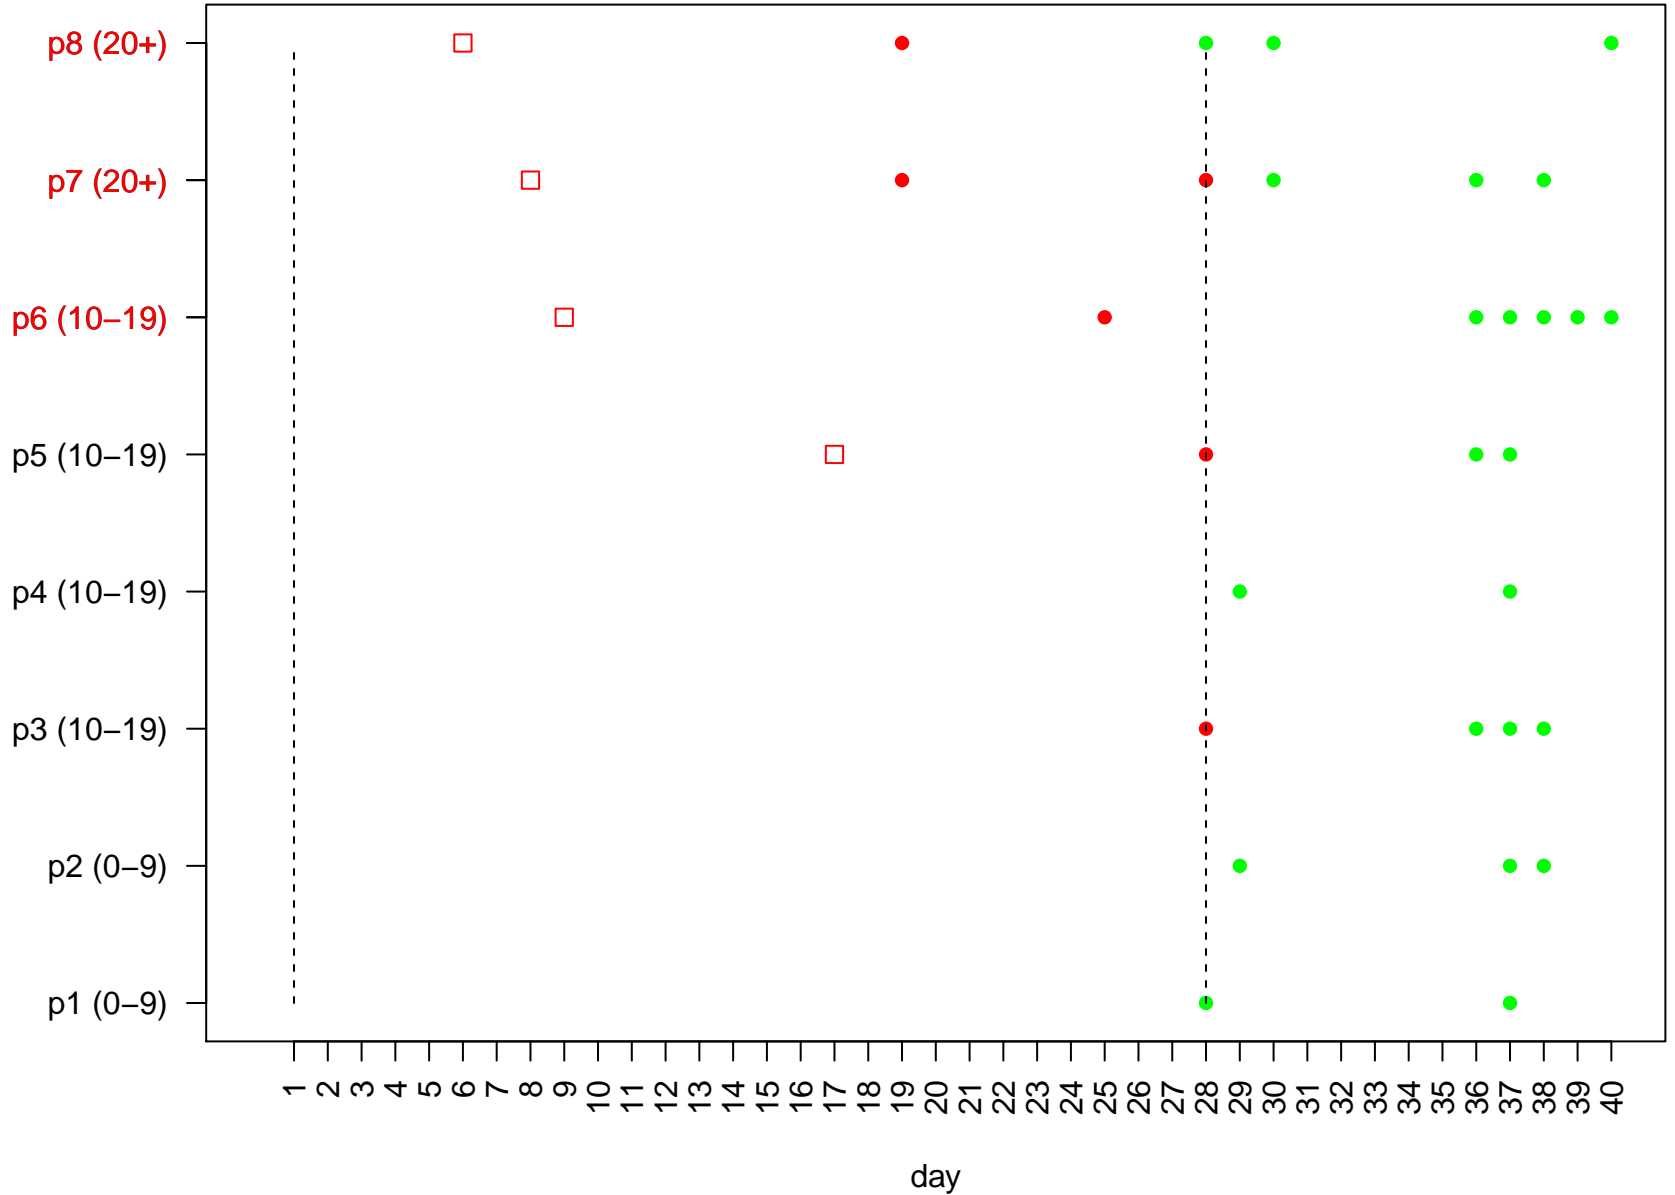

# Household 6

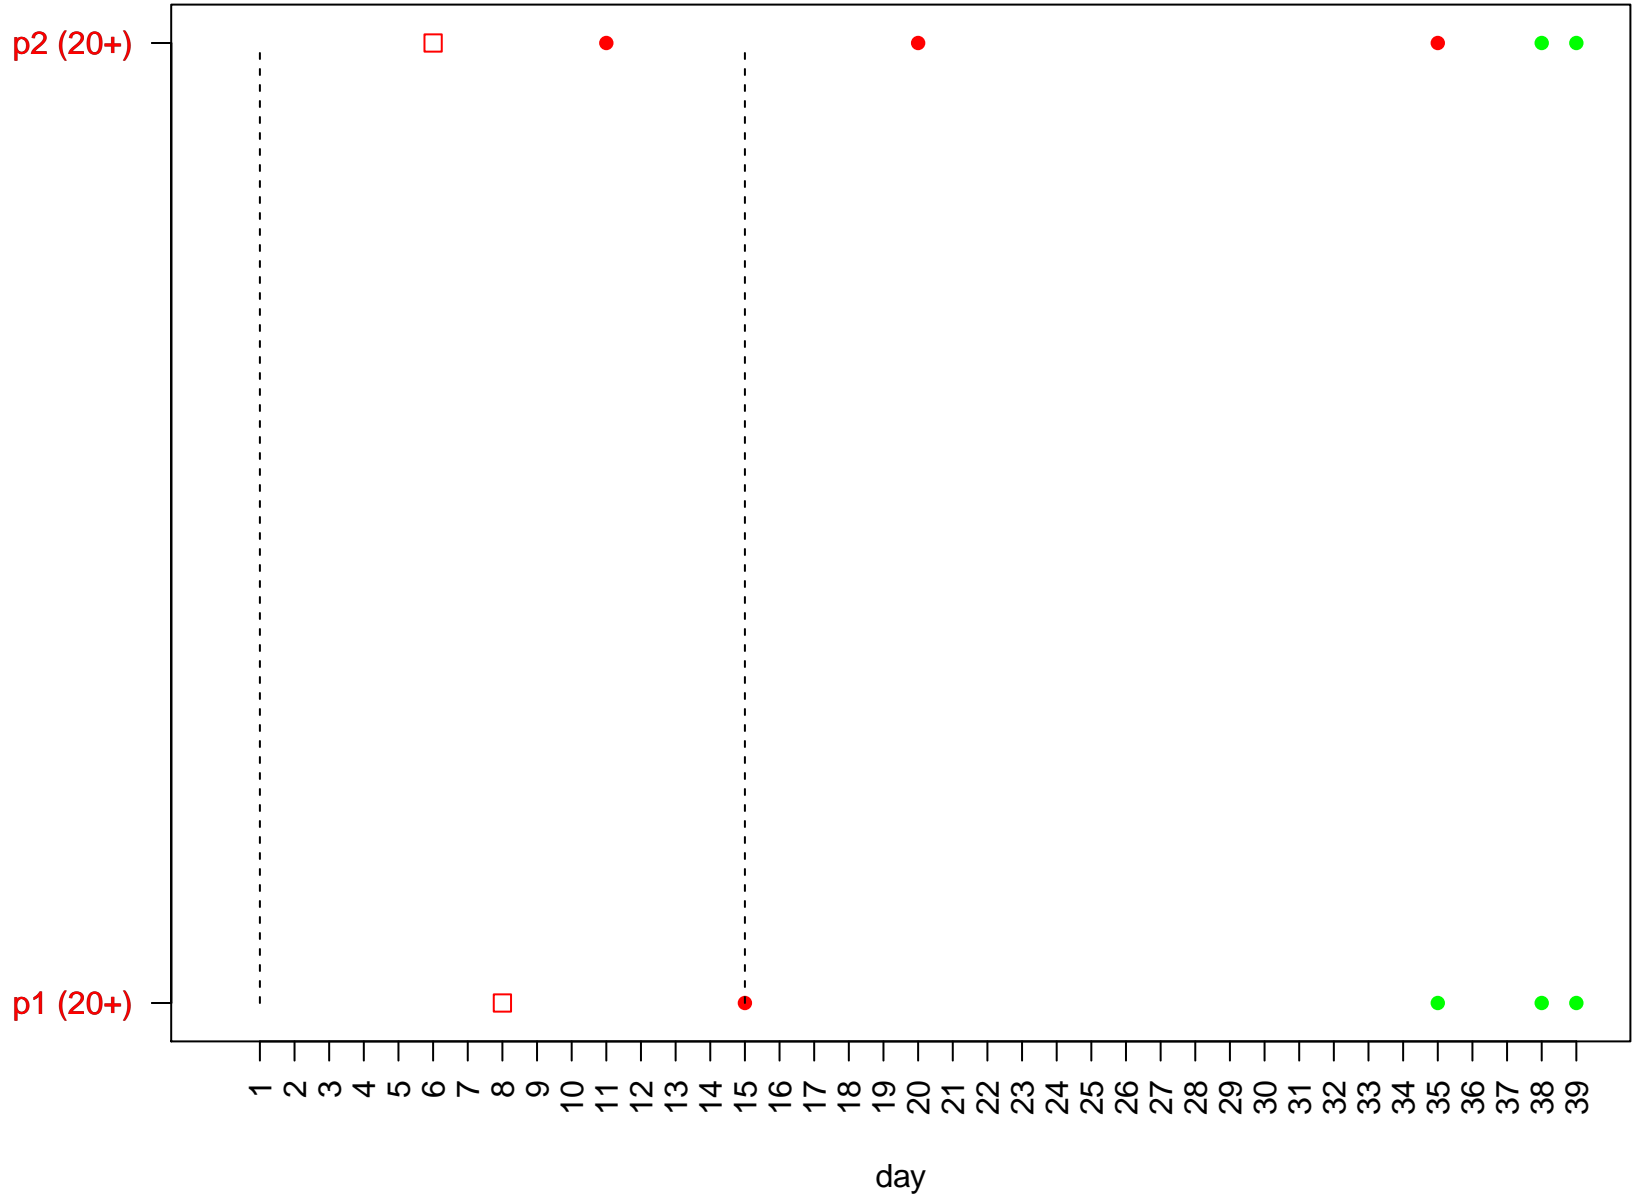

# Household 7

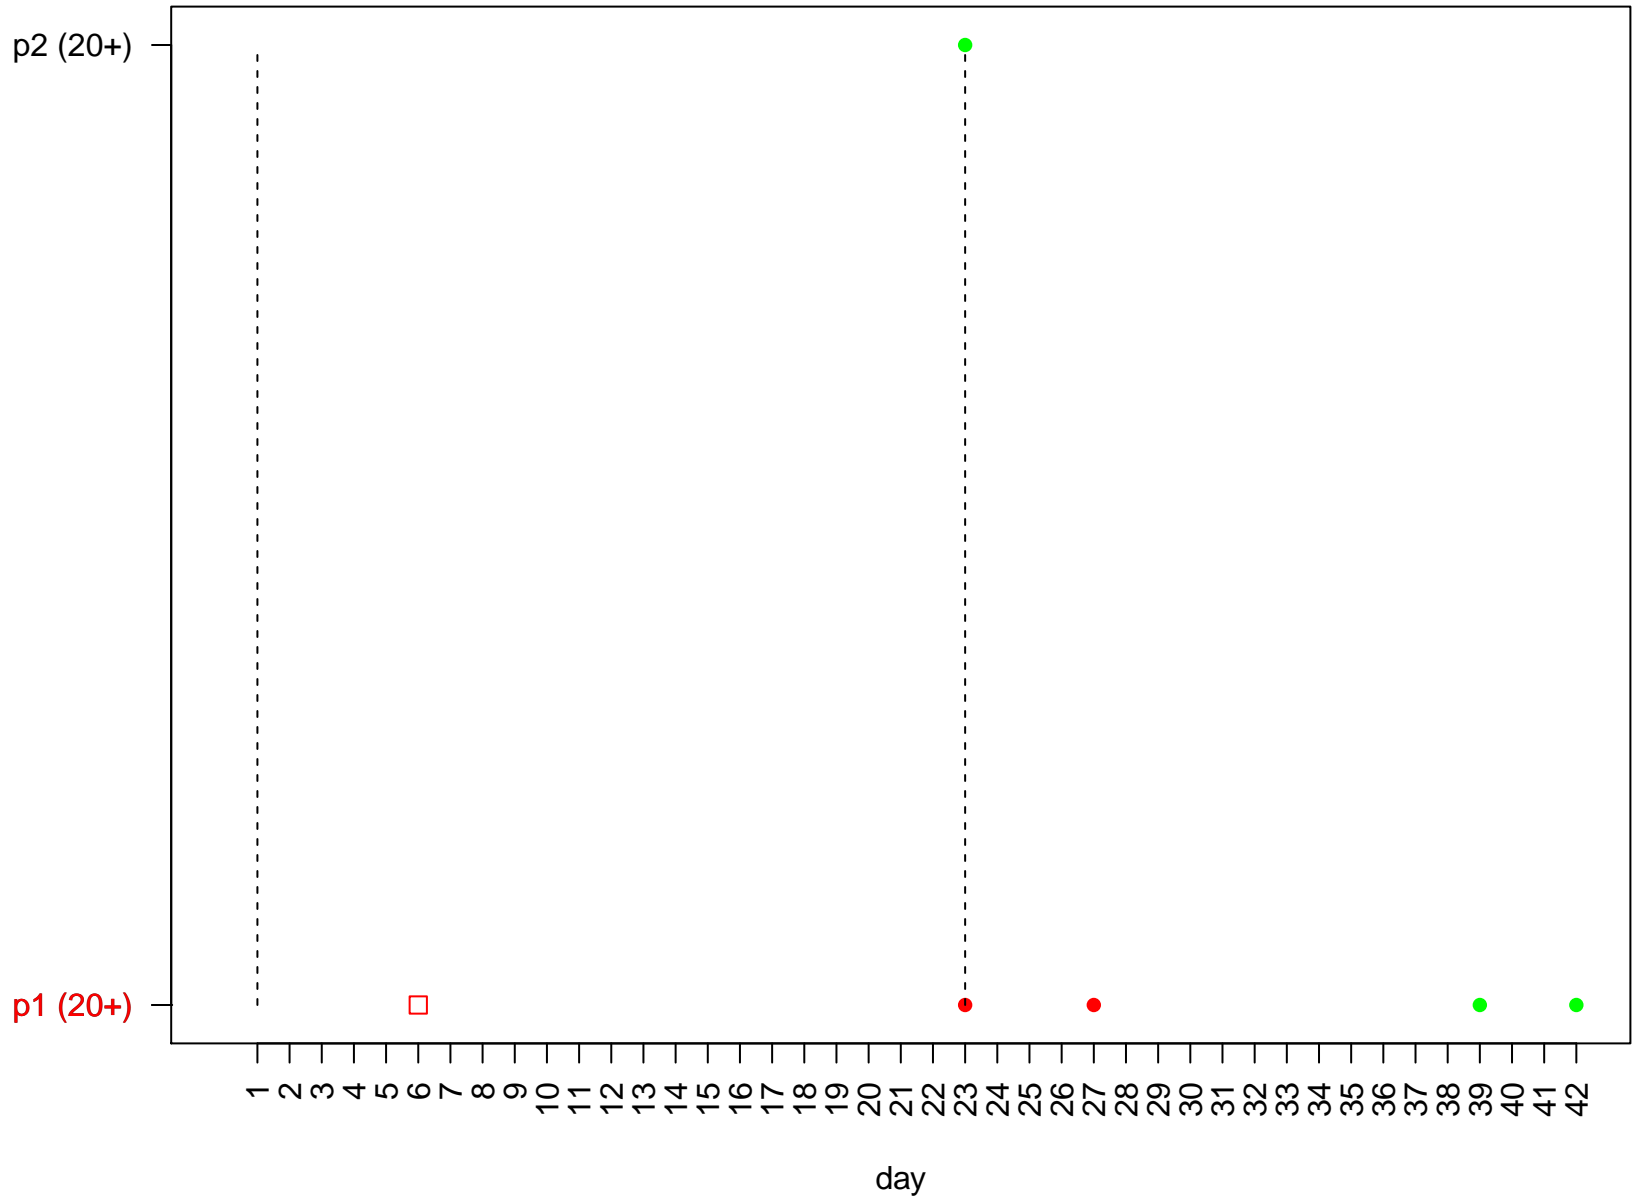

# Household 8

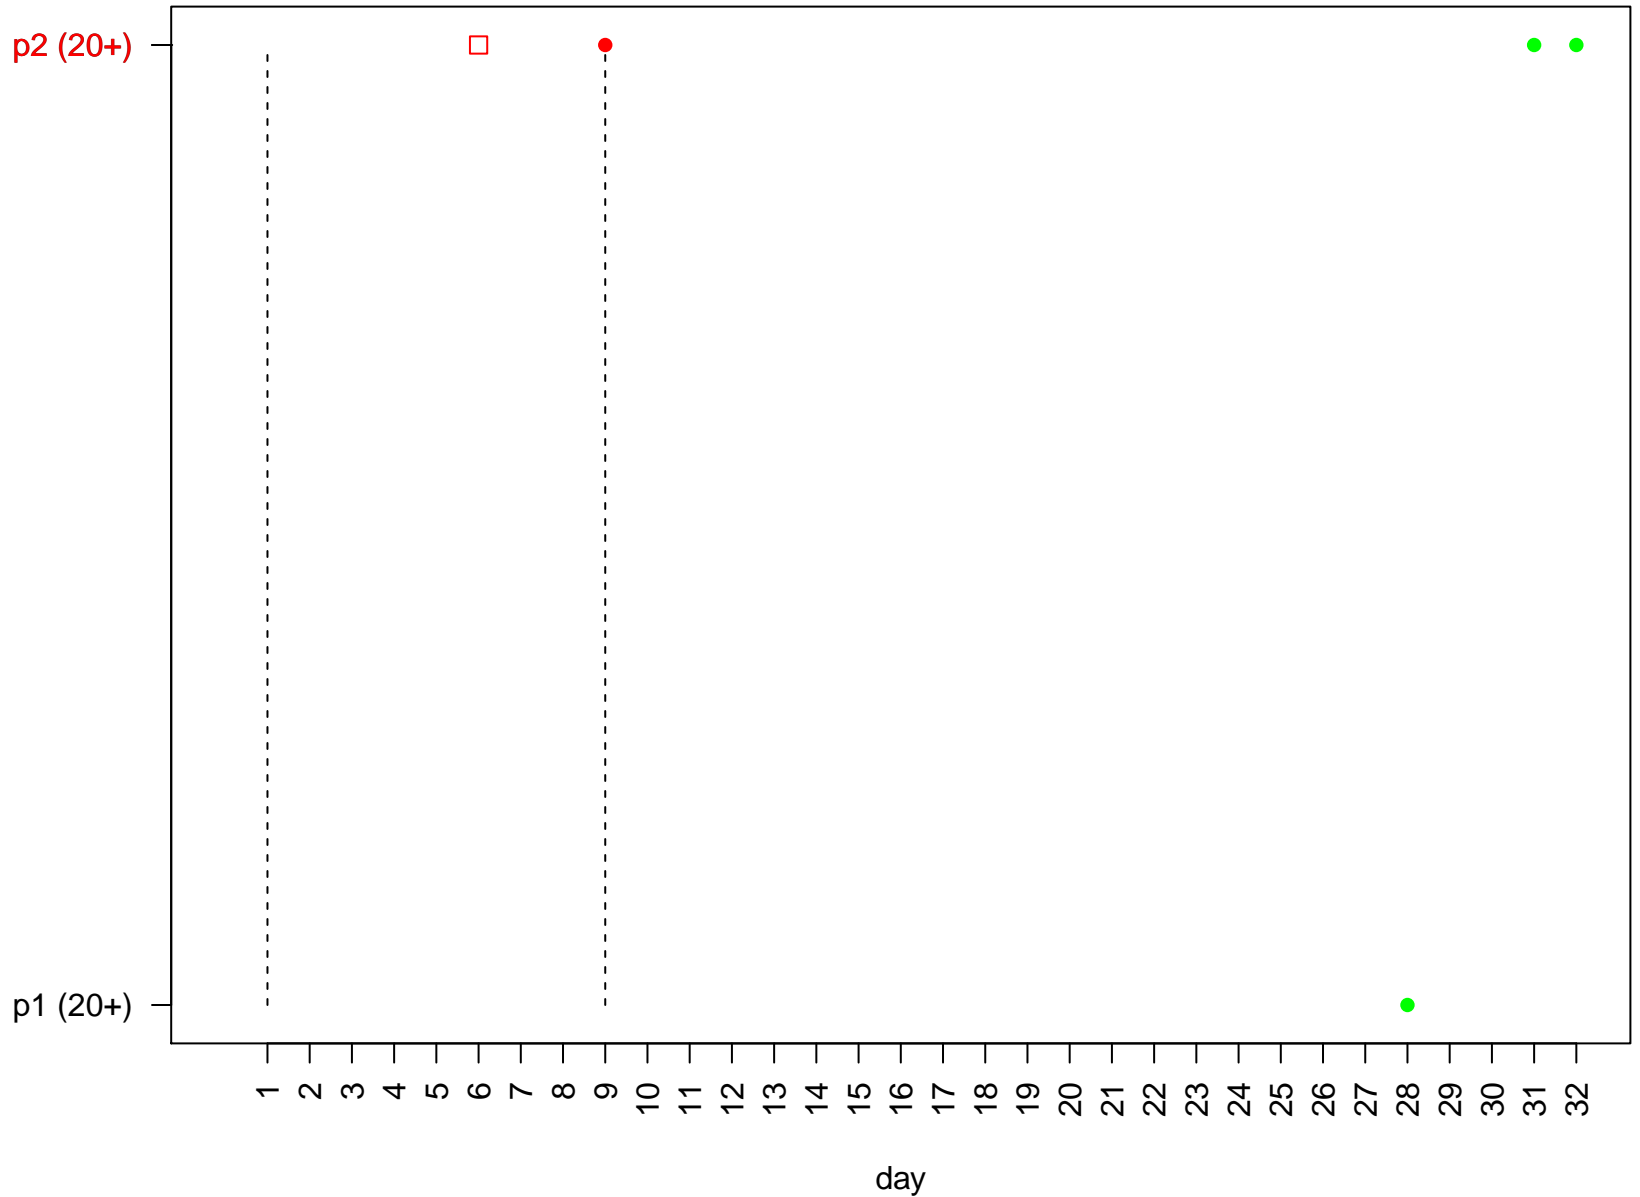



# Household 9

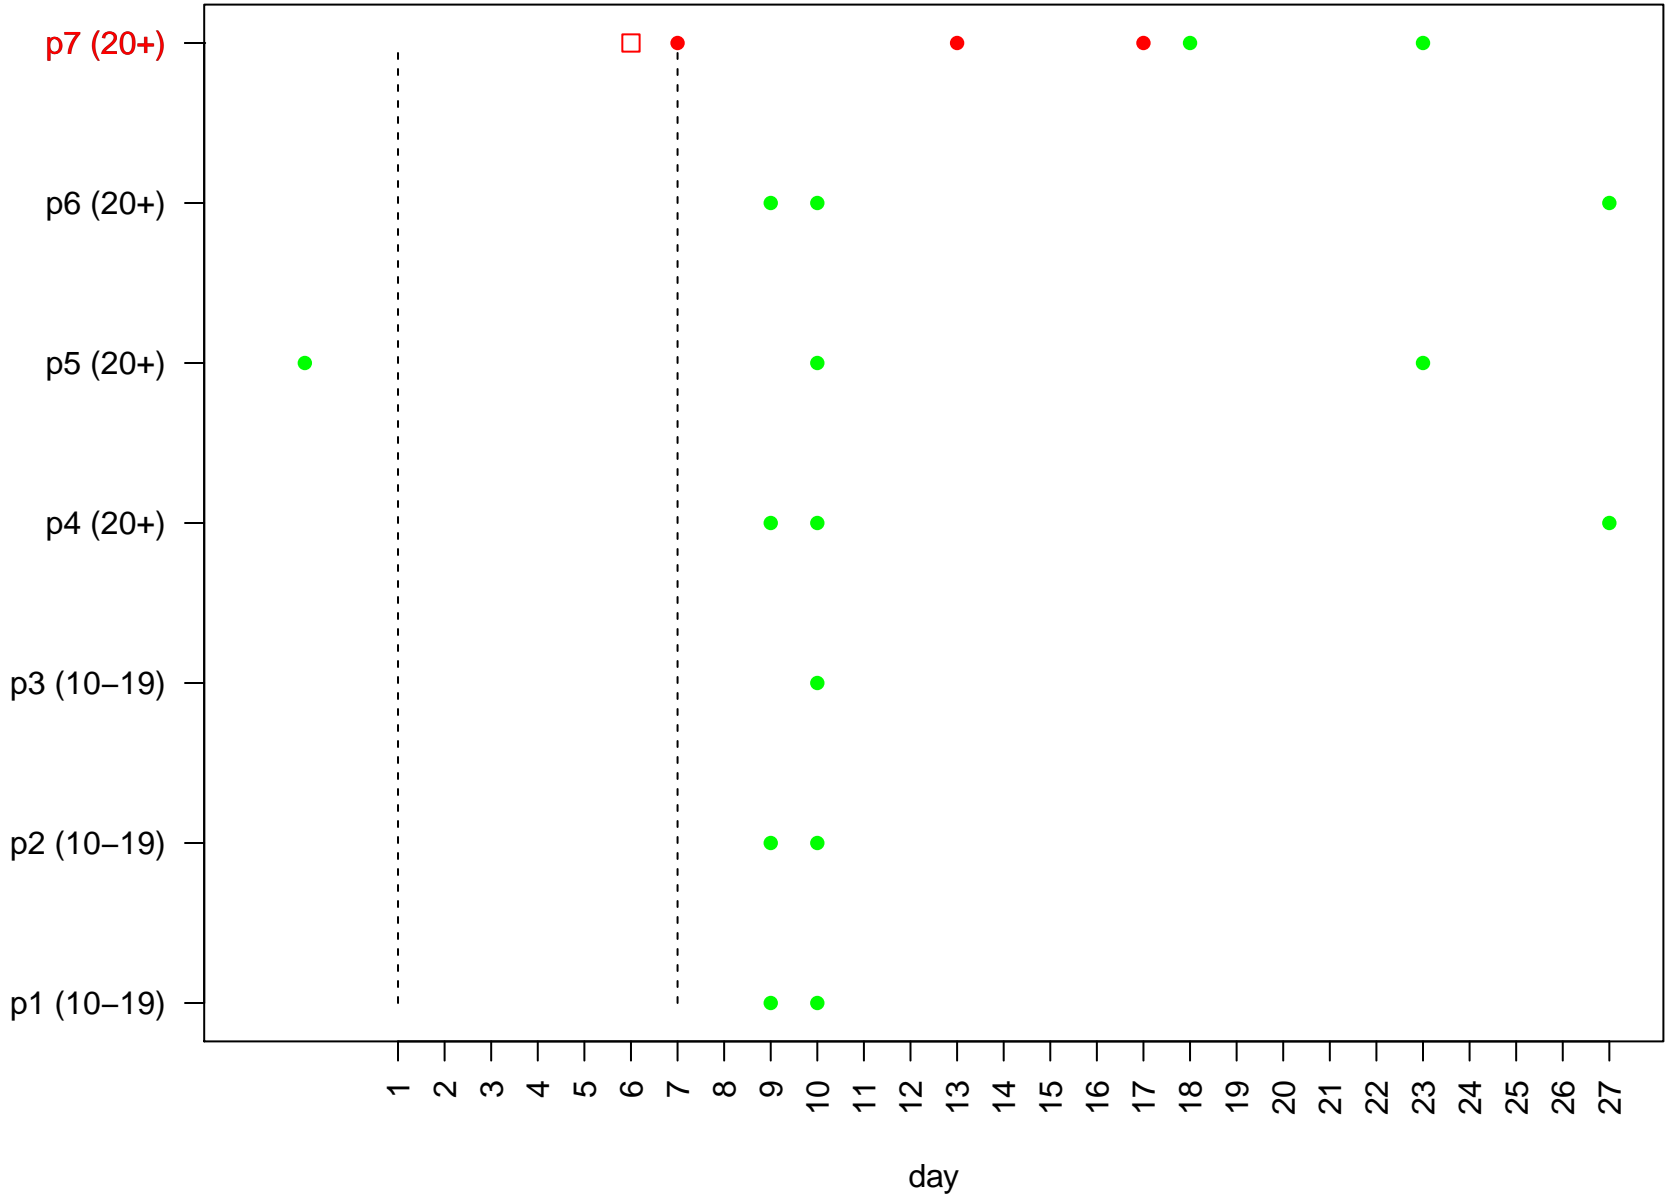

# Household 11

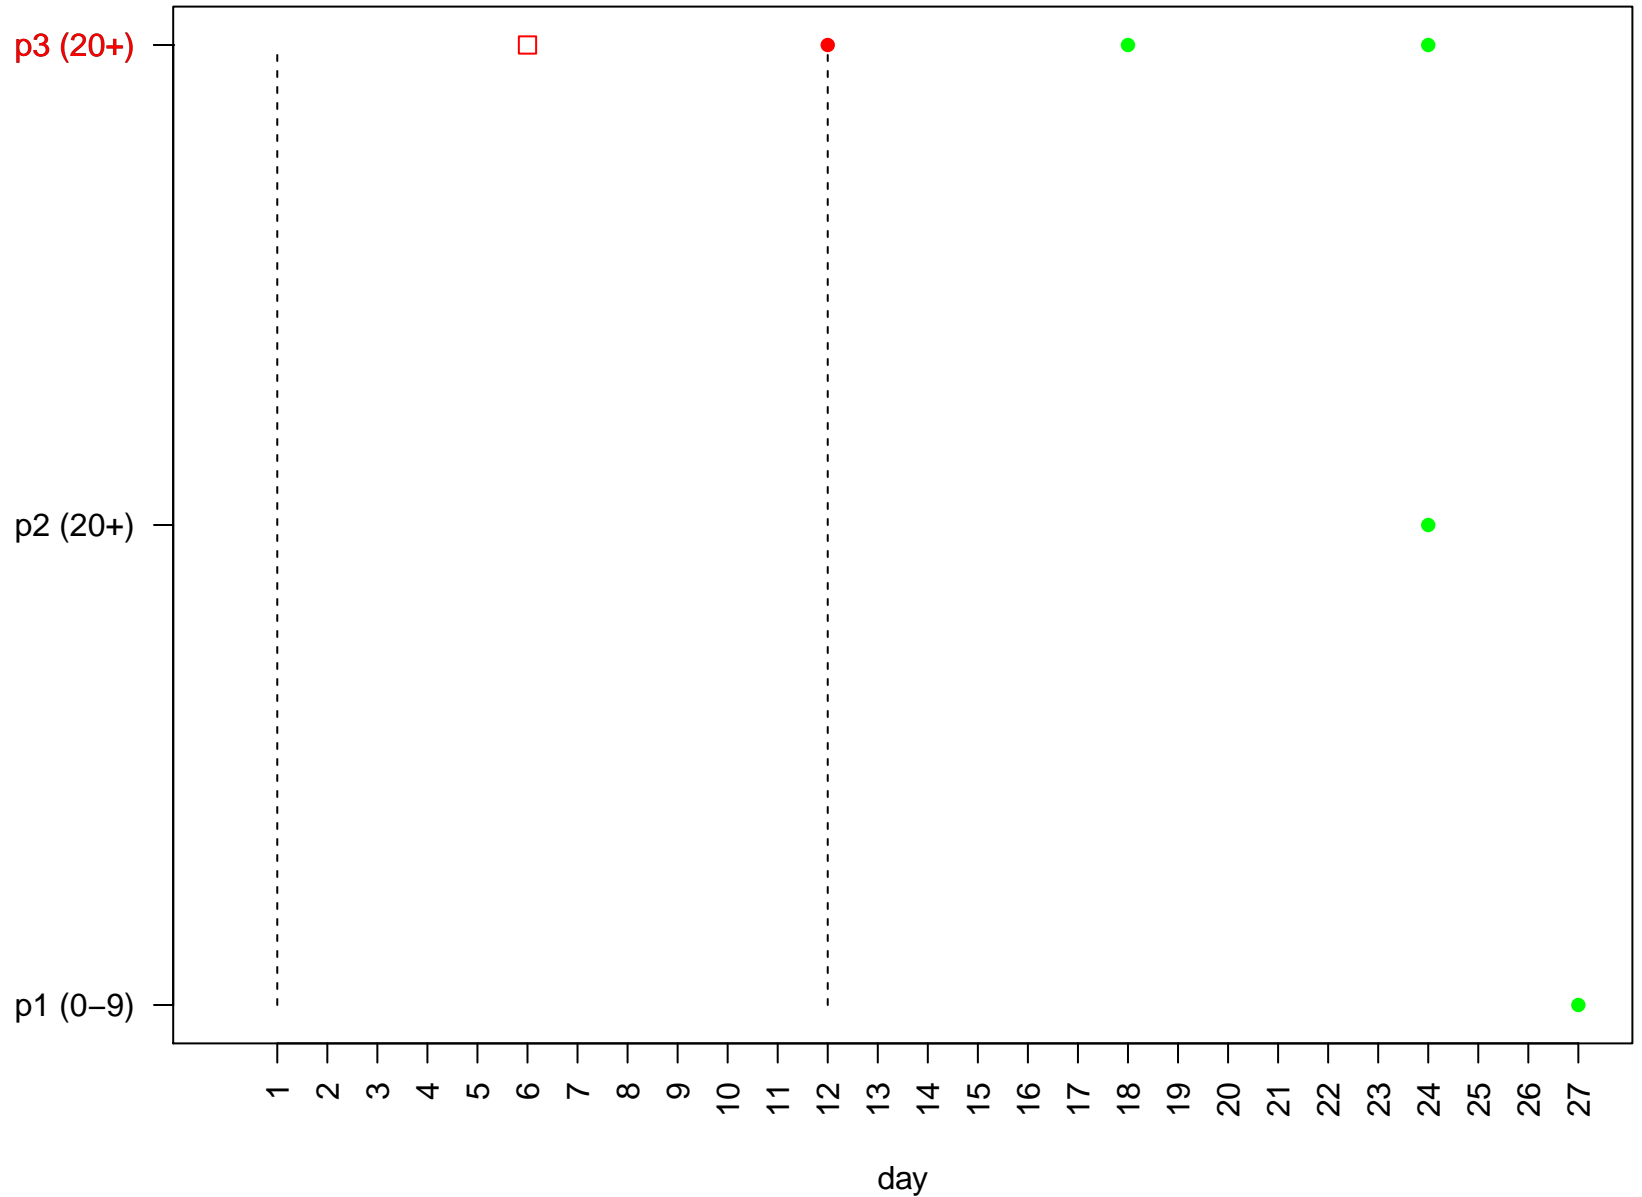

# Household 12

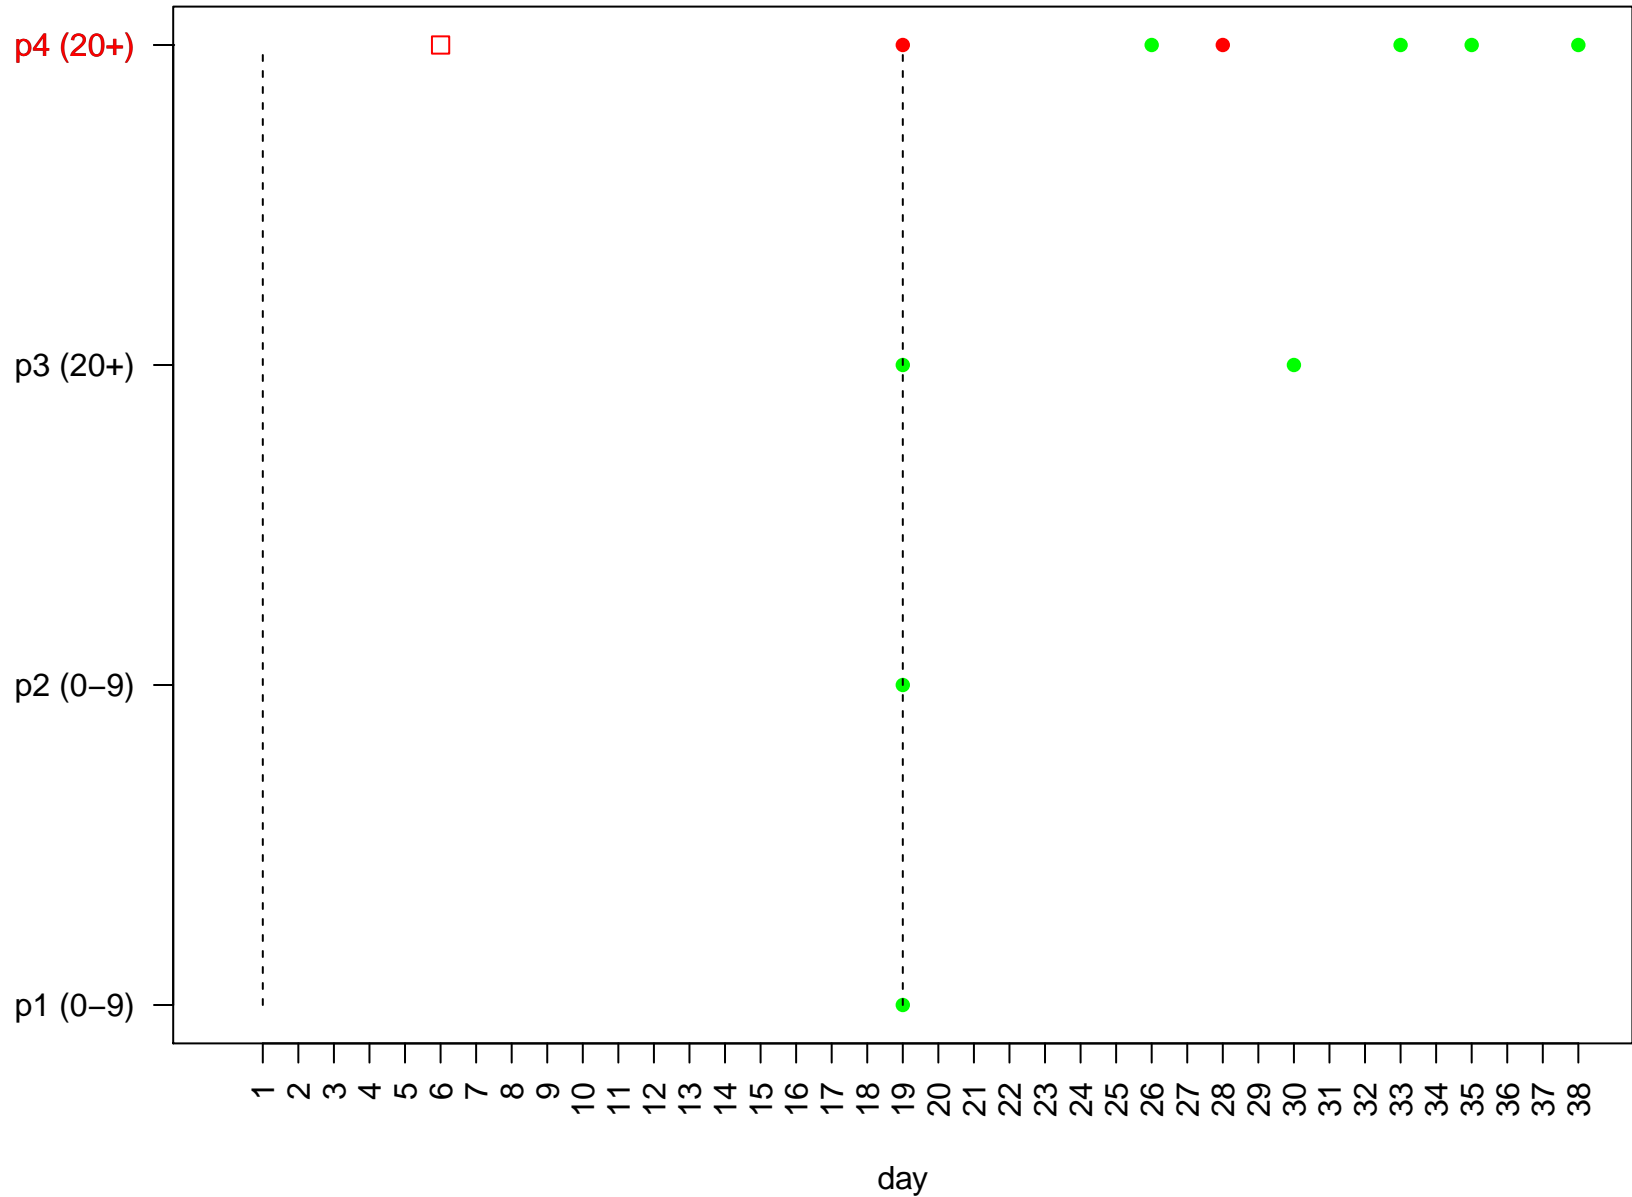

# Household 13

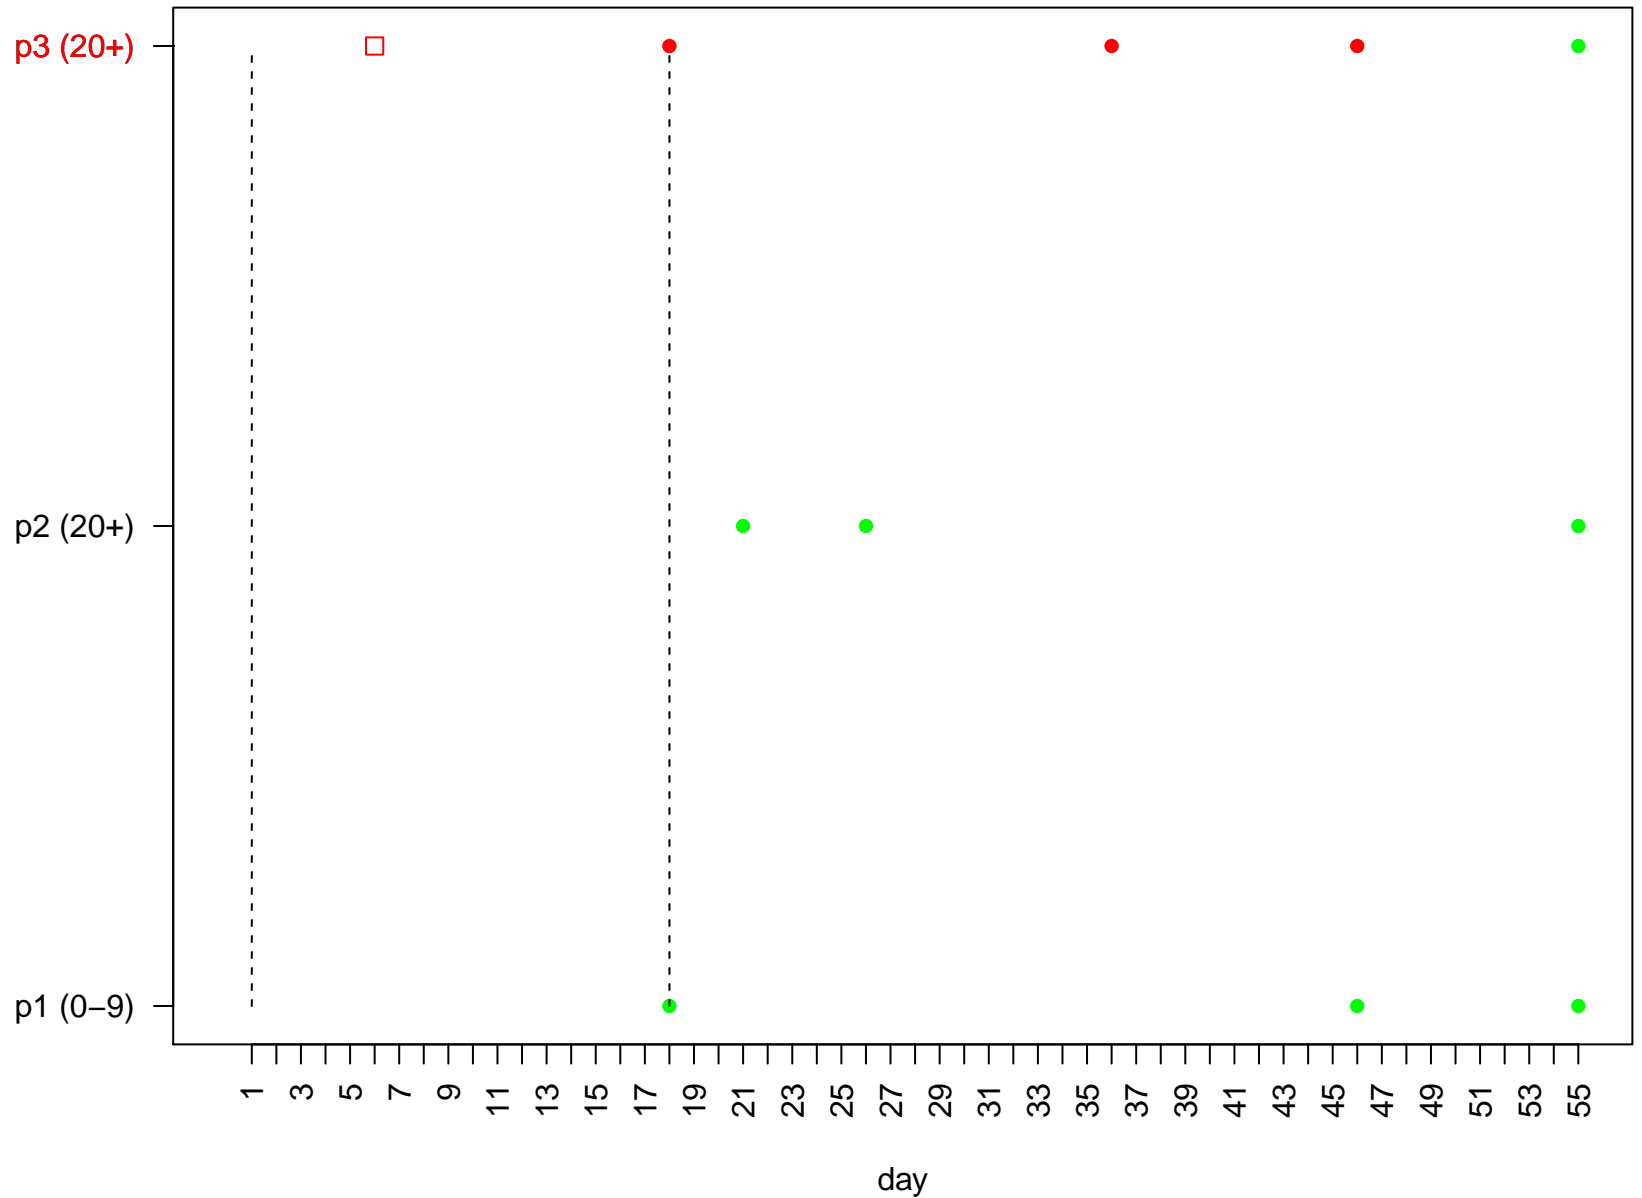

# Household 14

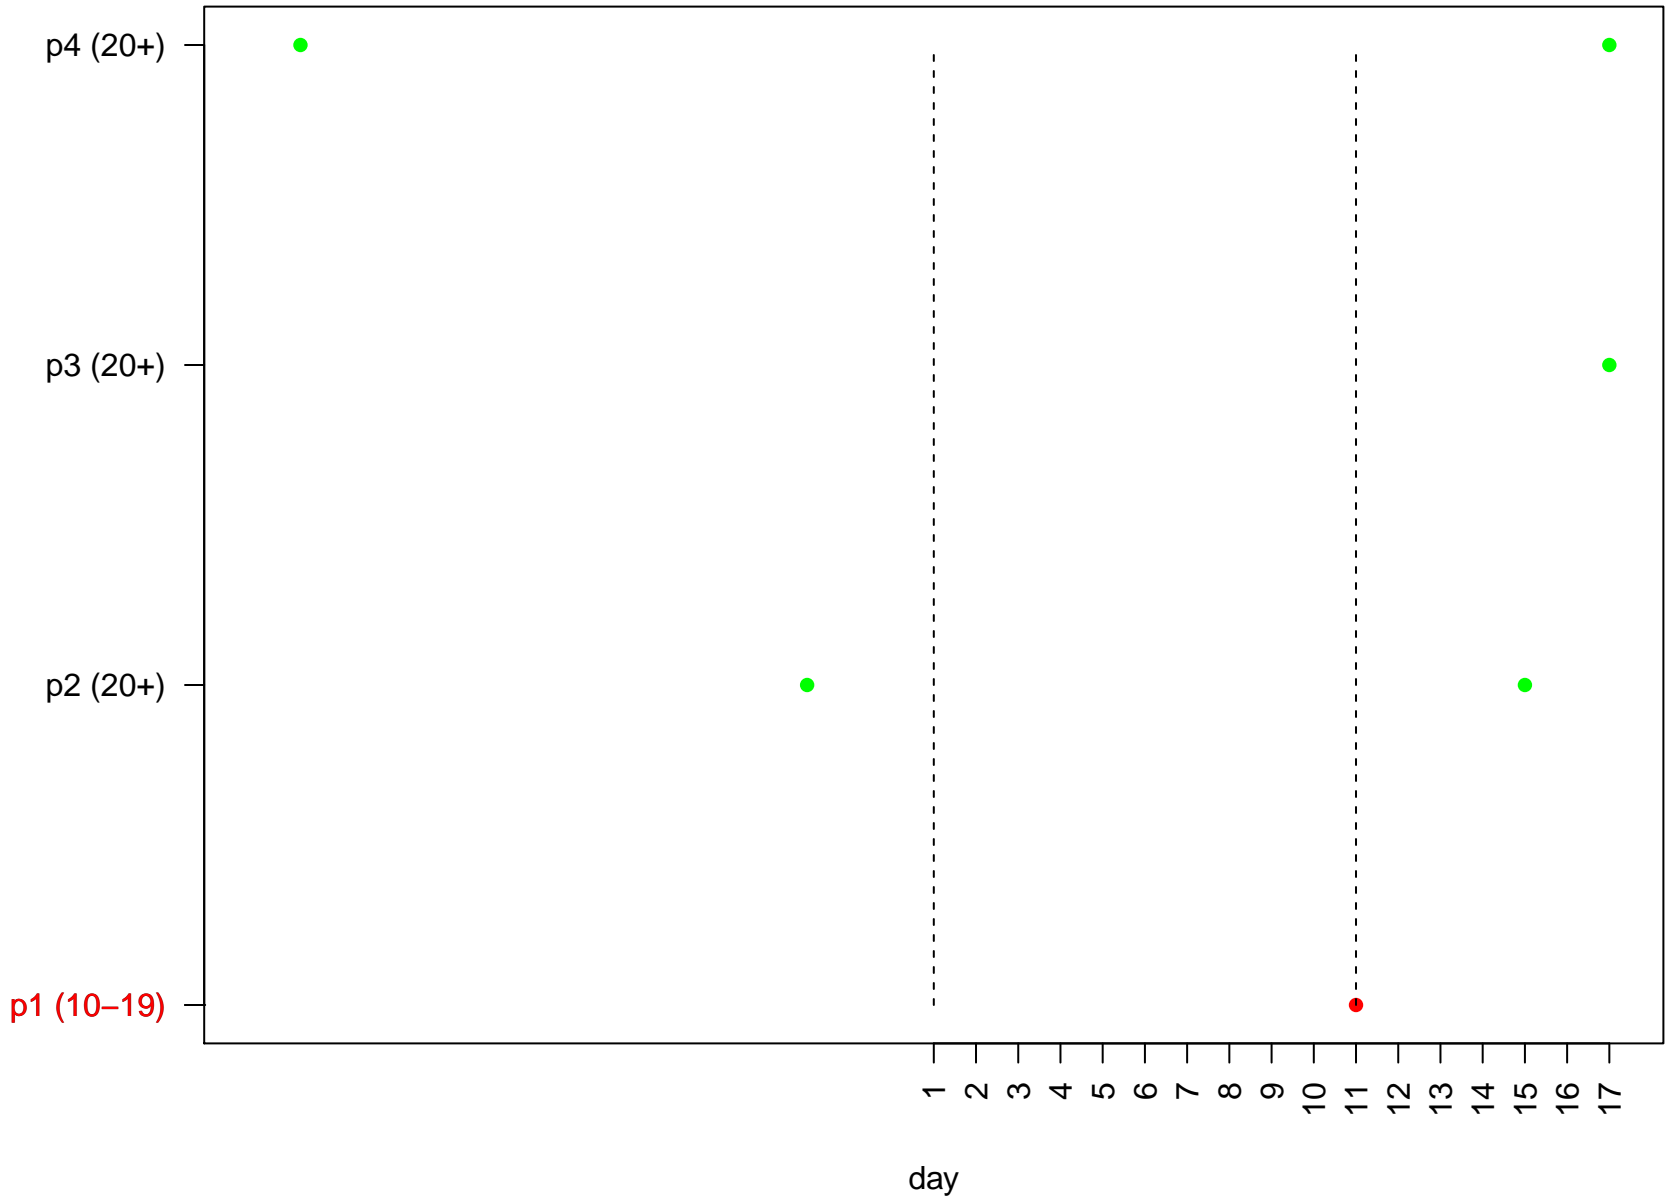

# Household 15

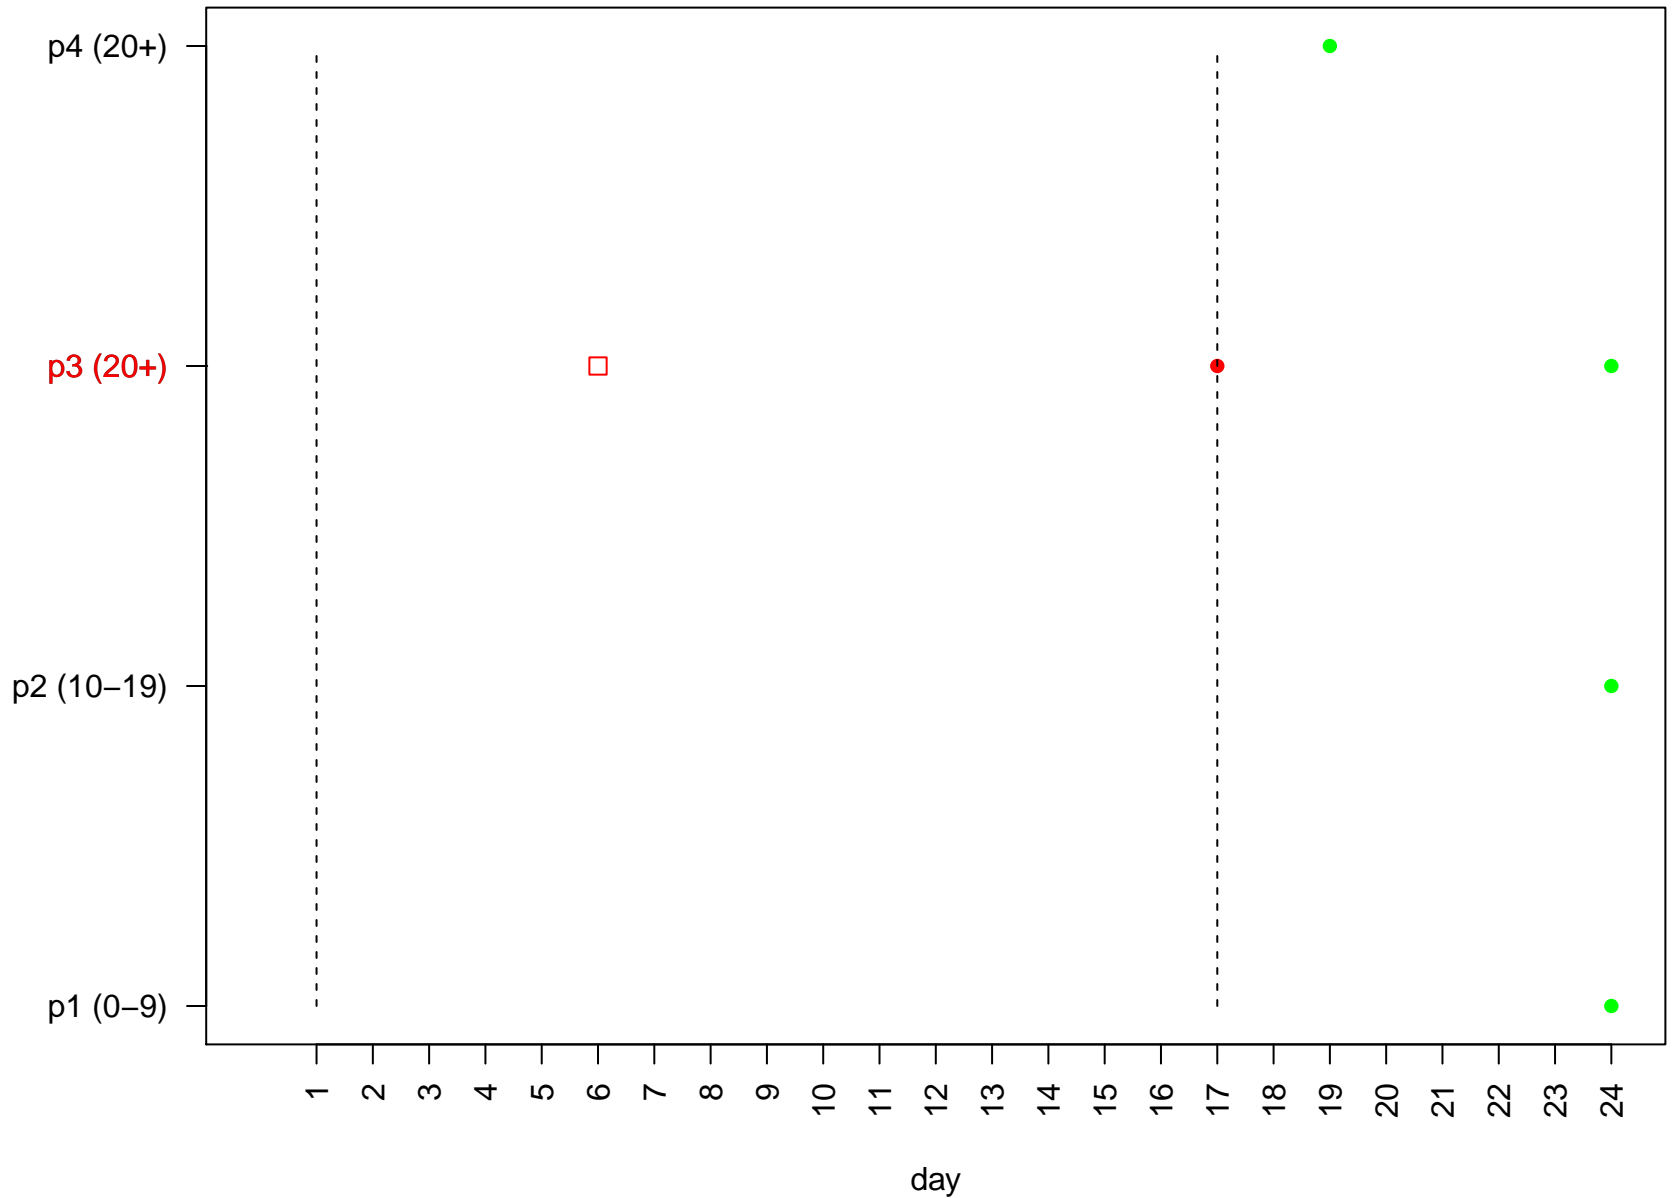

# Household 16

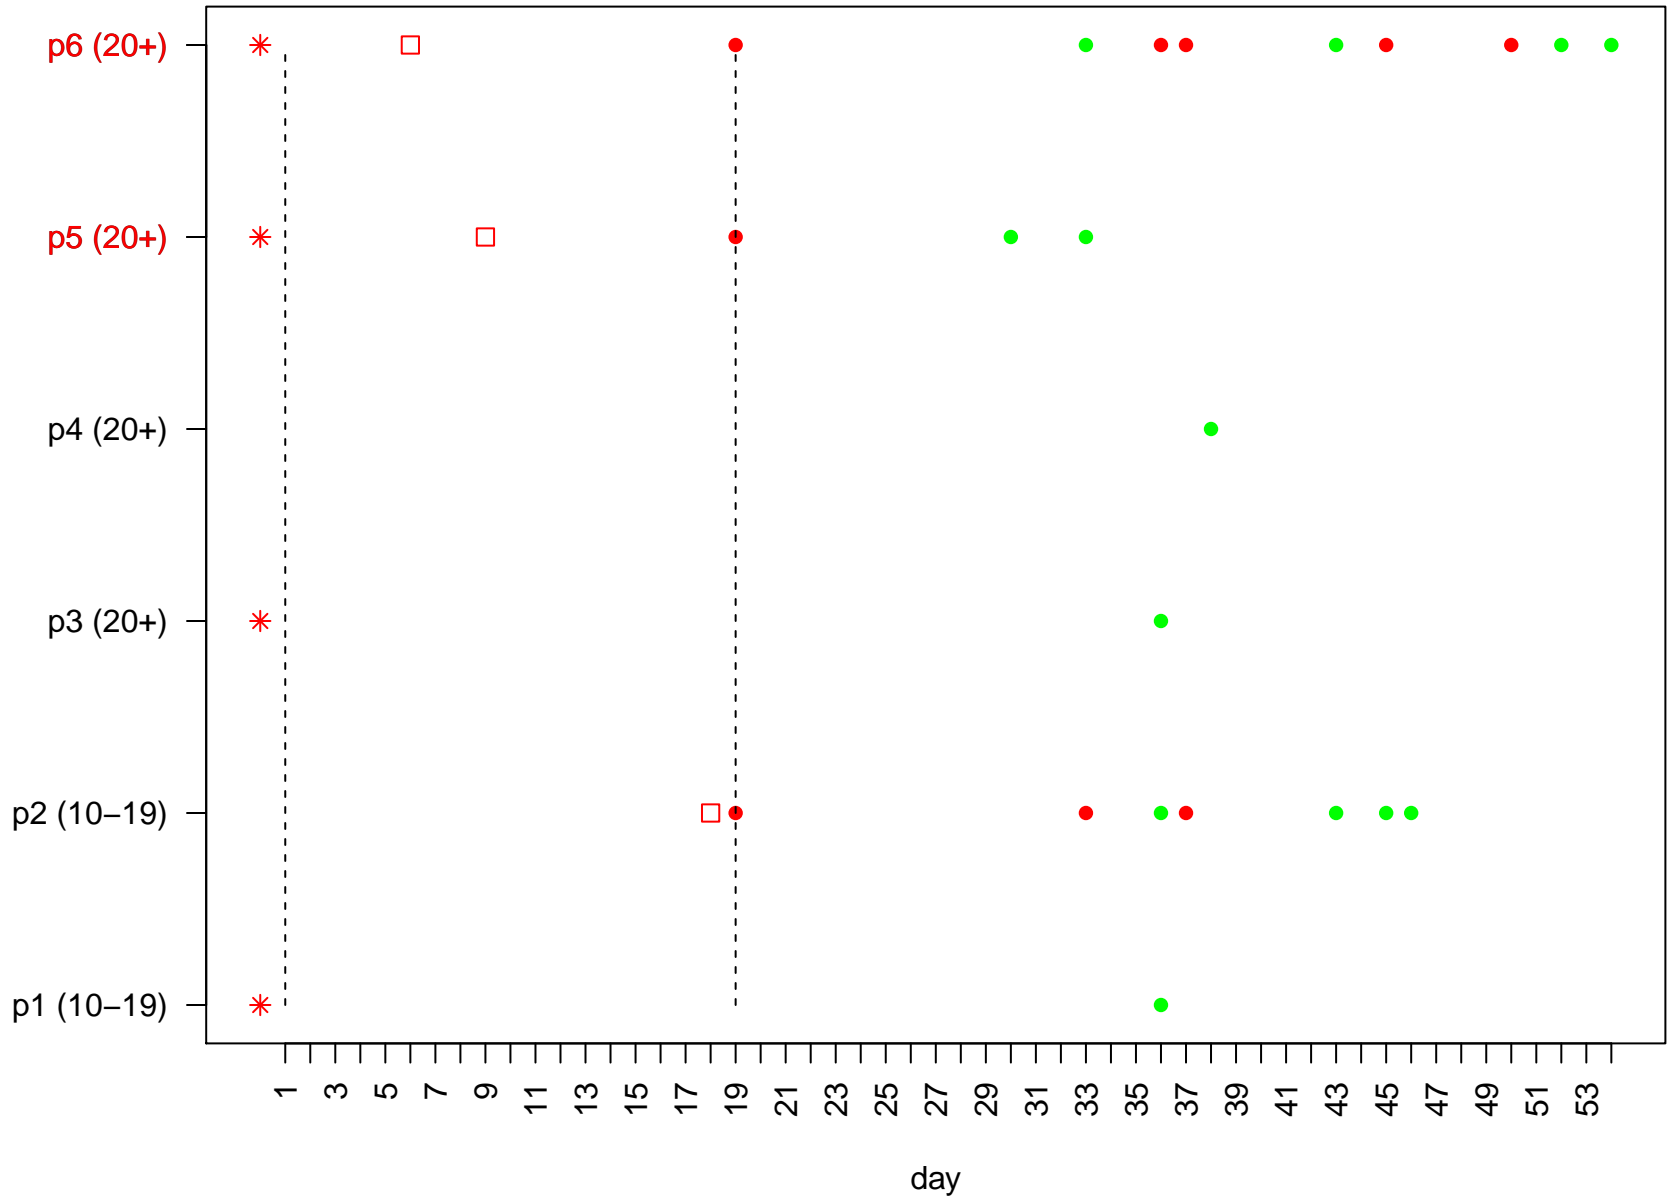

# Household 17

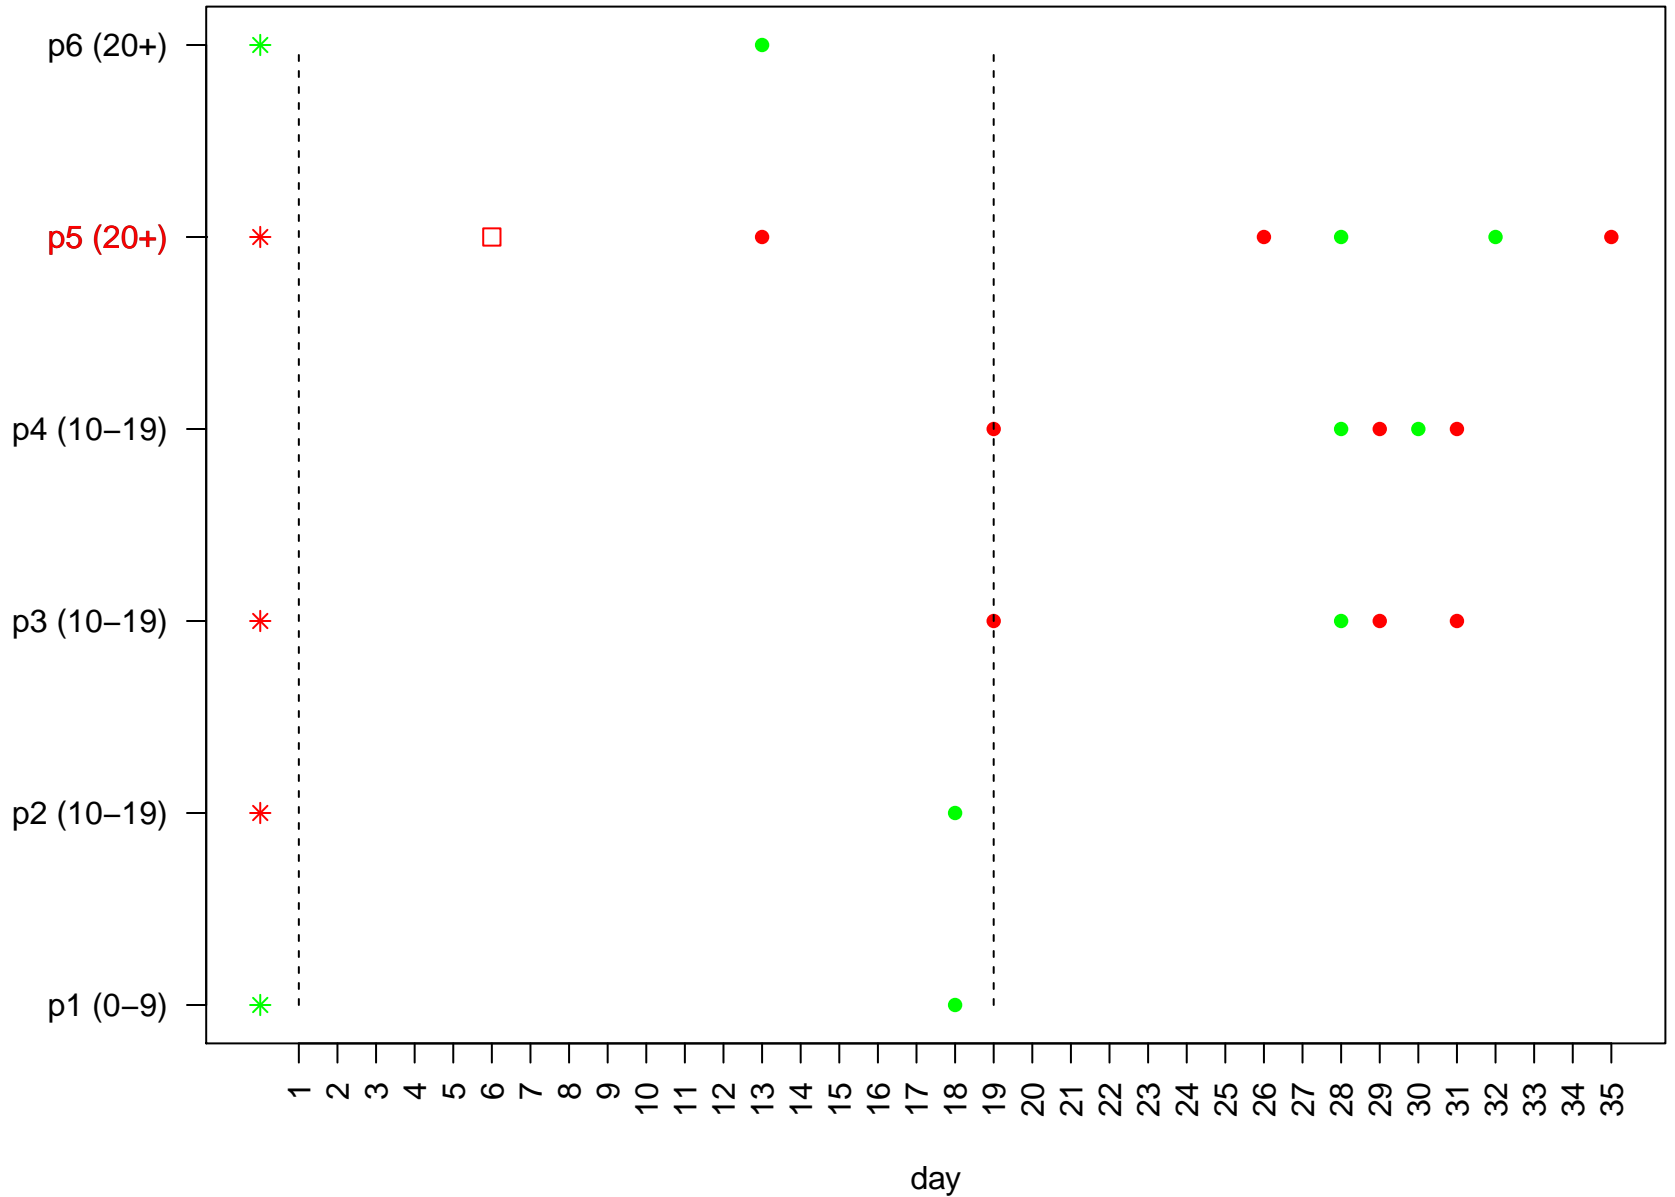



# Household 18

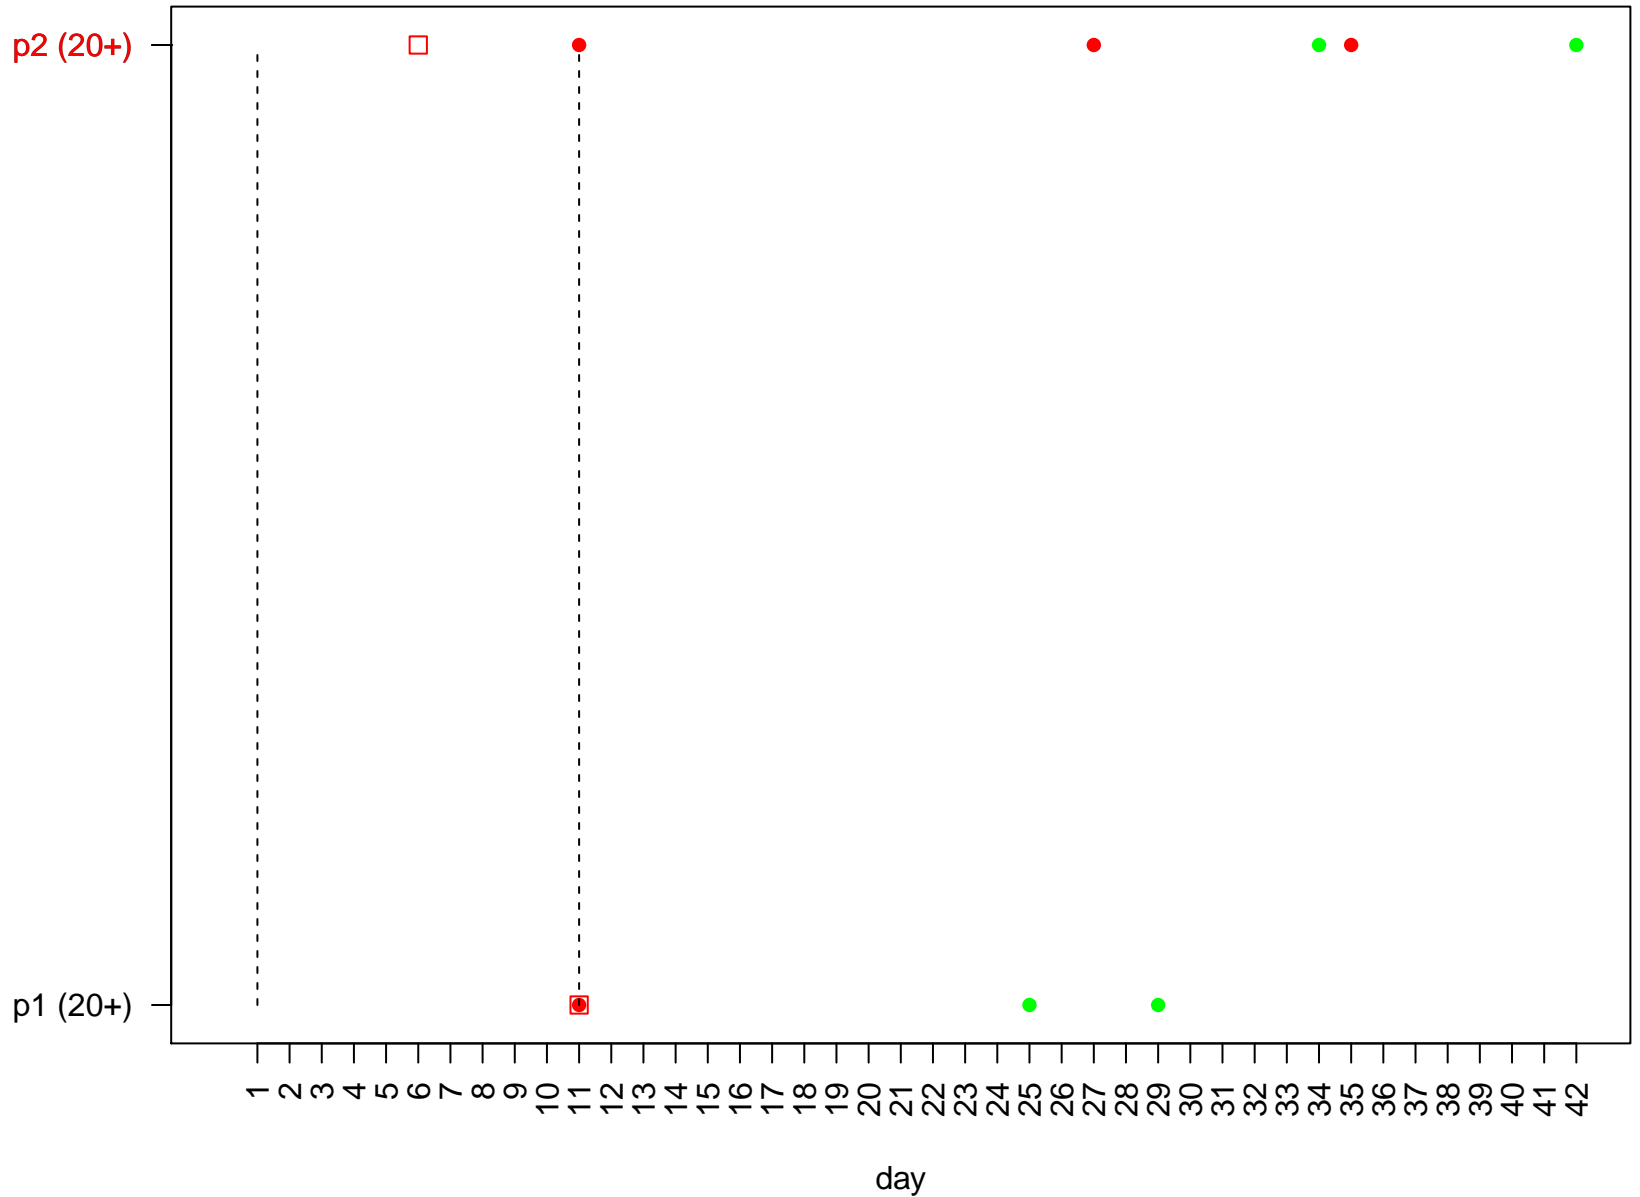

# Household 19

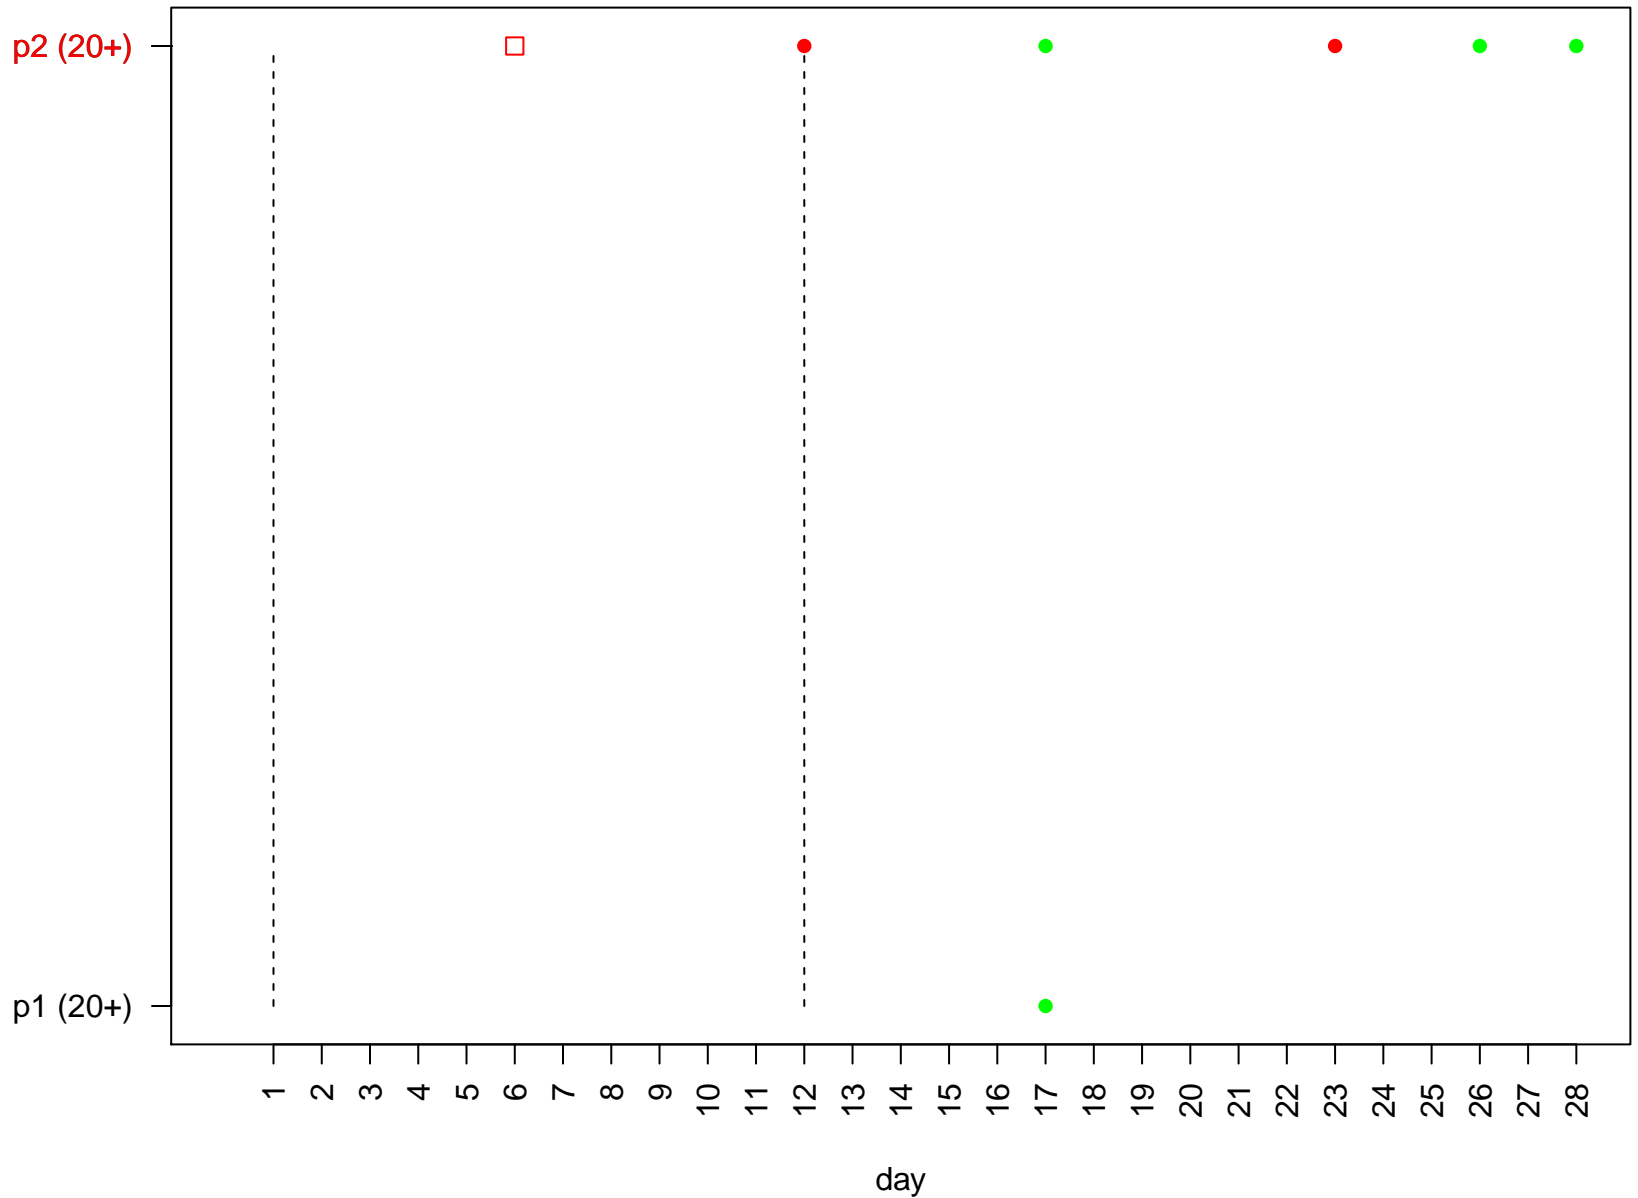

# Household 20

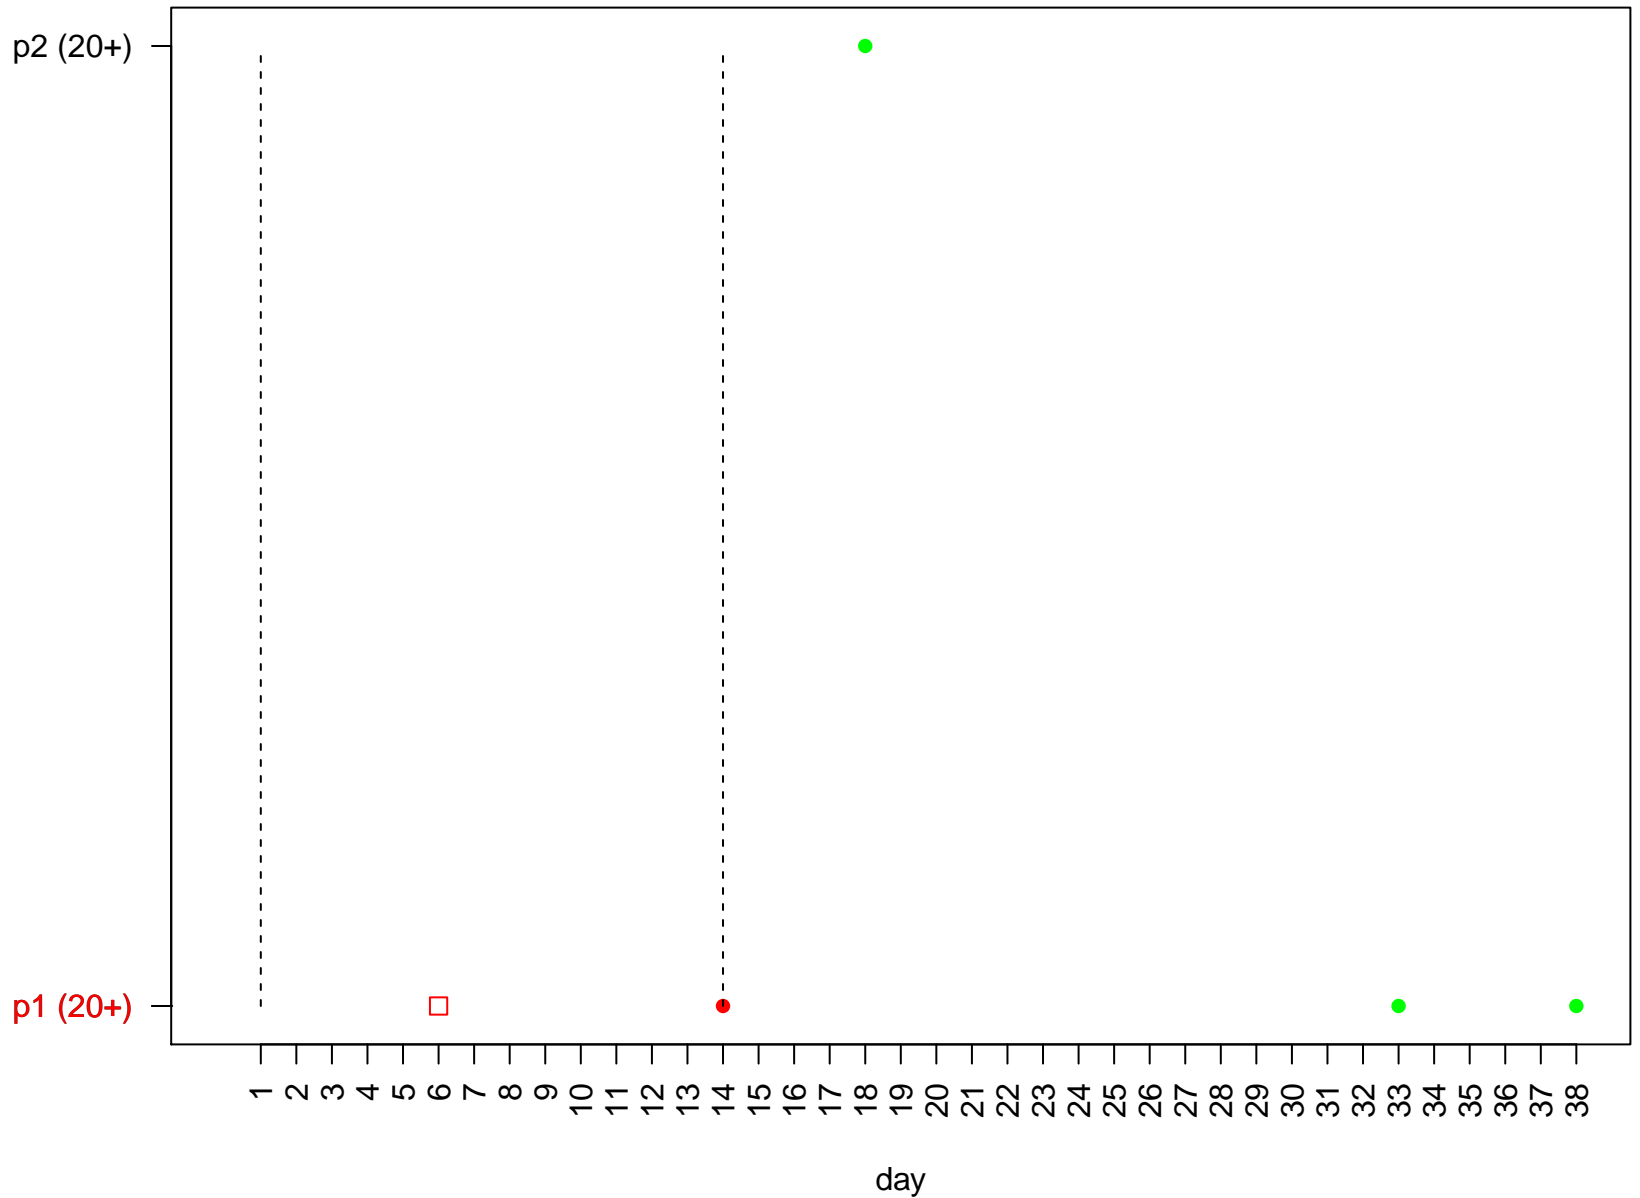

# Household 22

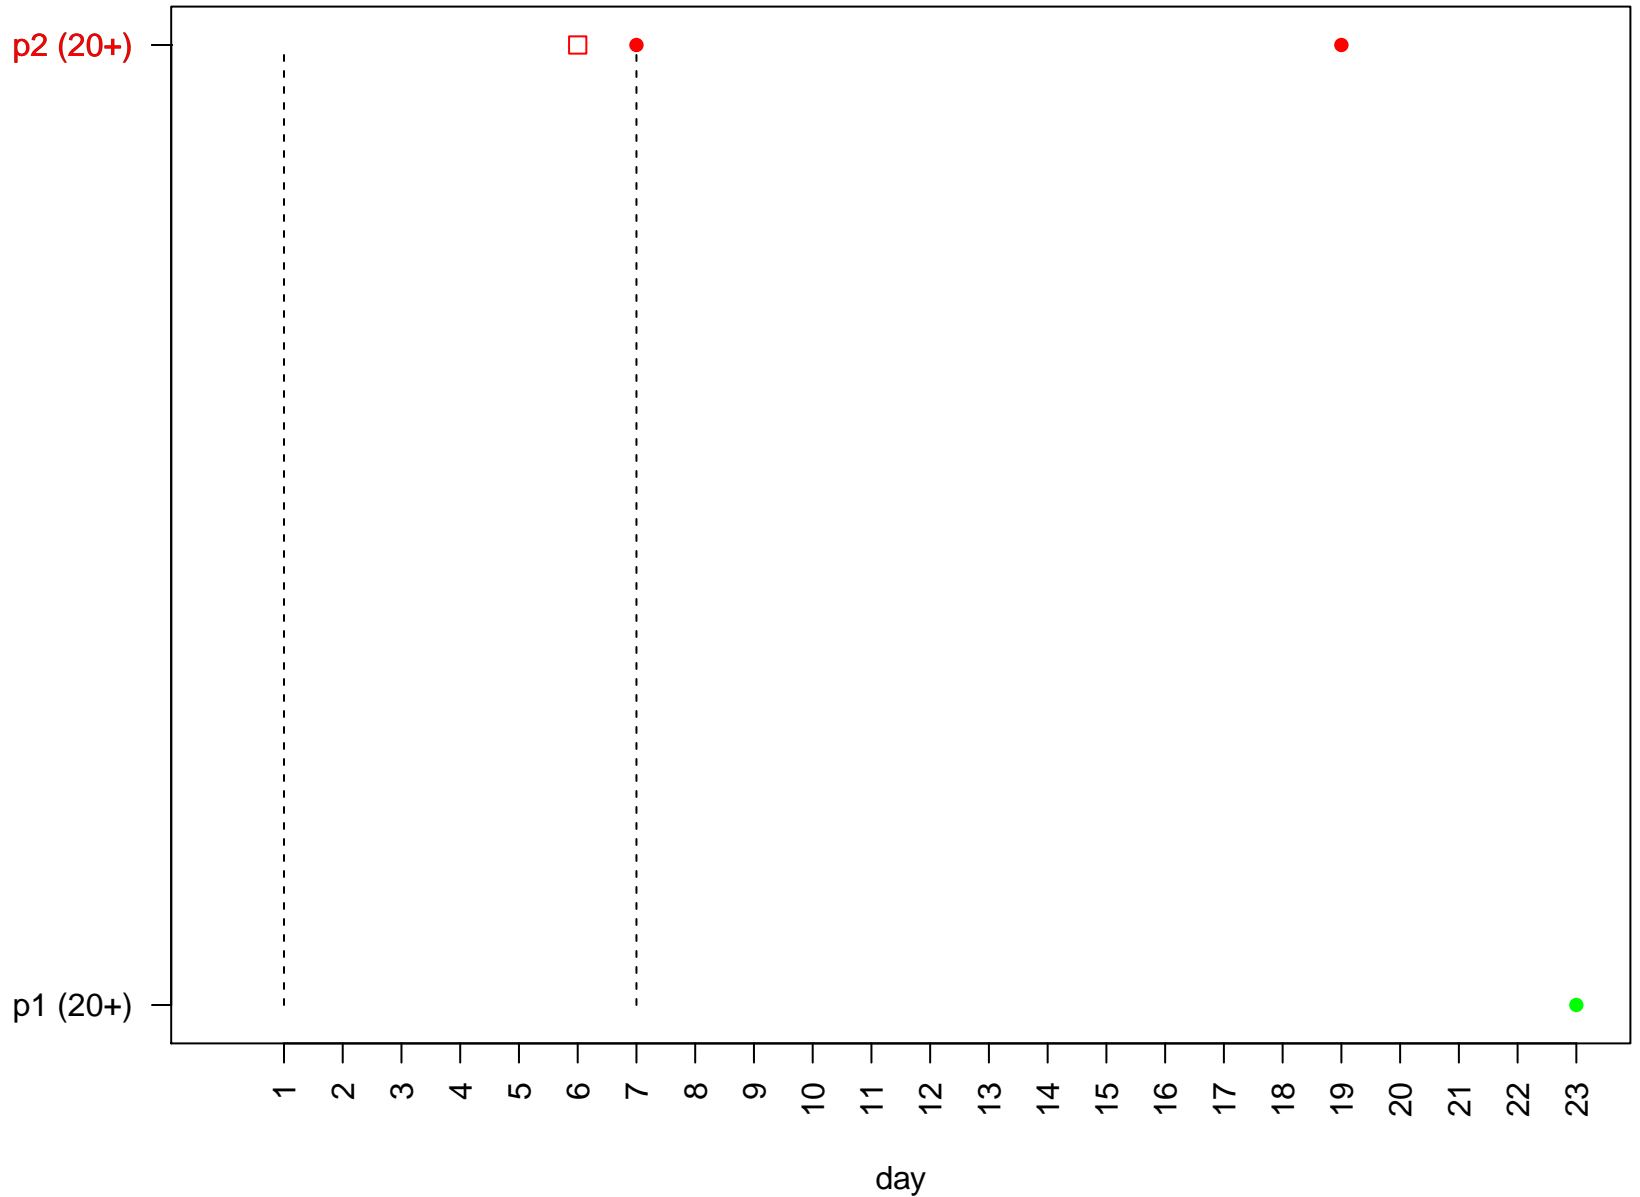

# Household 23

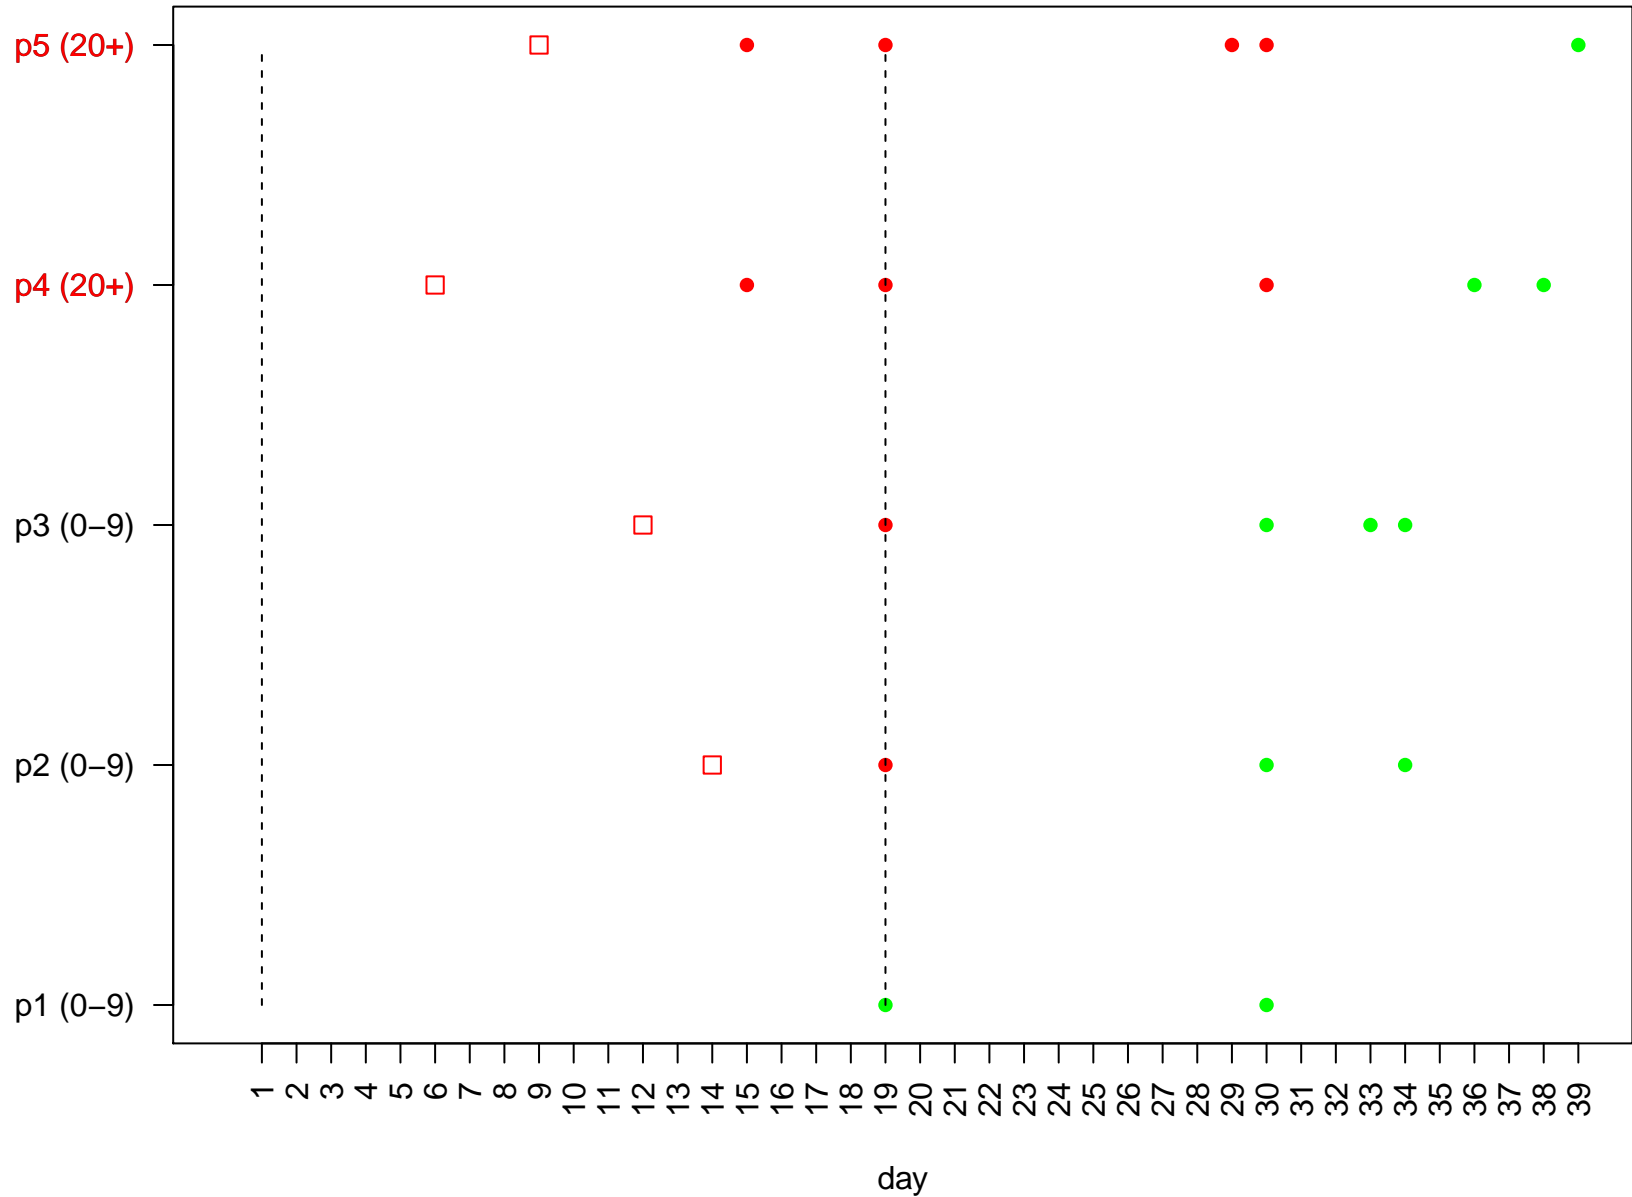

# Household 24

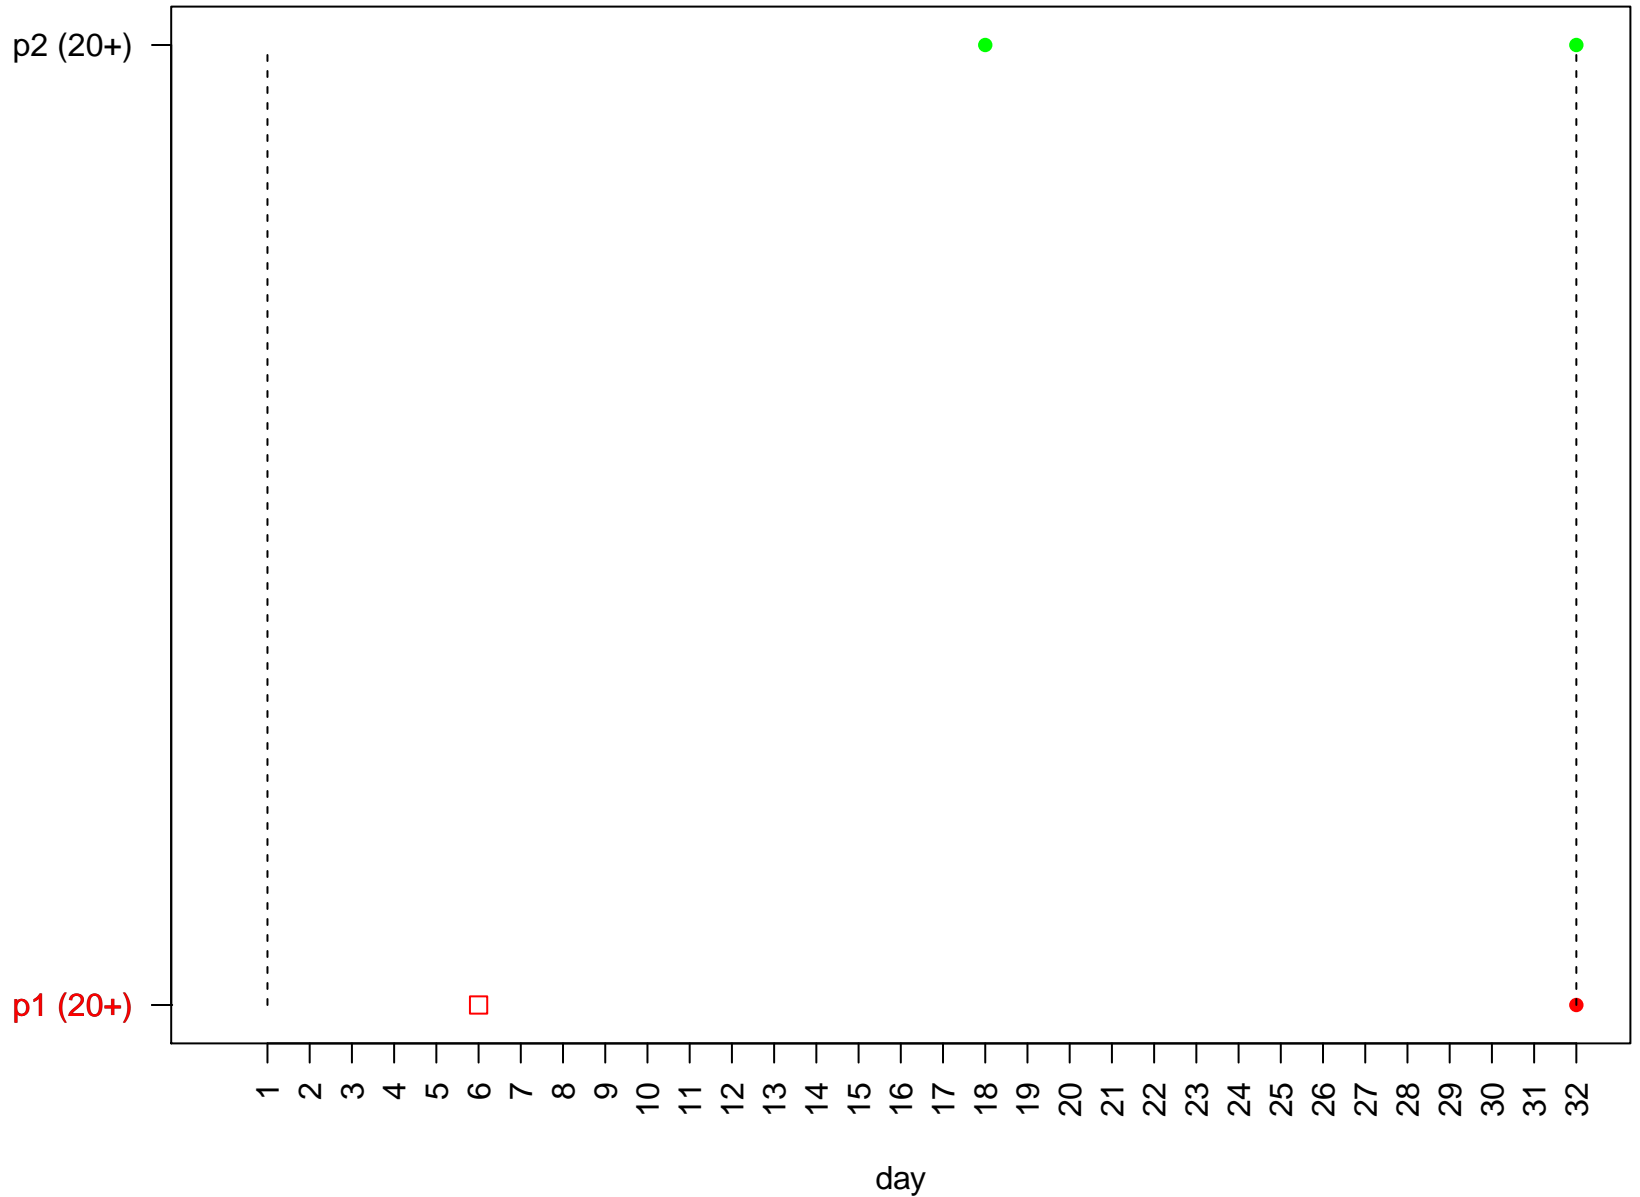

# Household 25

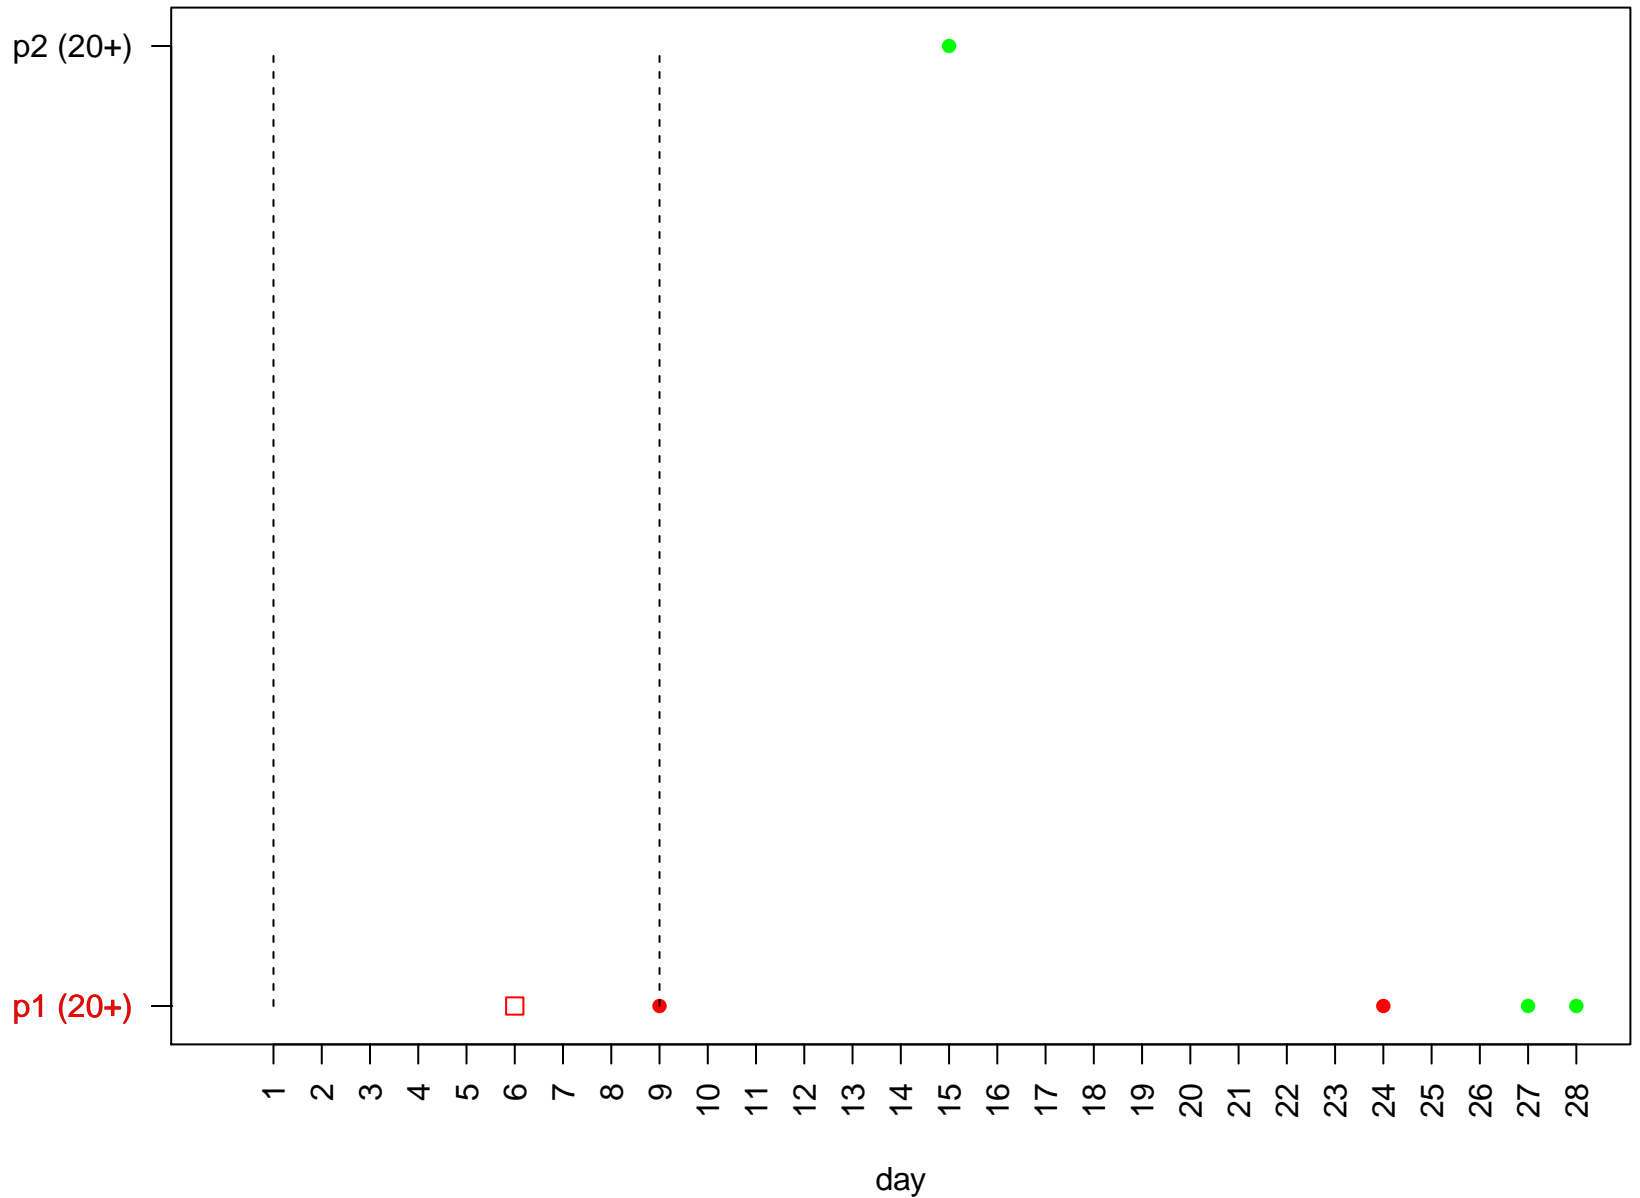

# Household 26

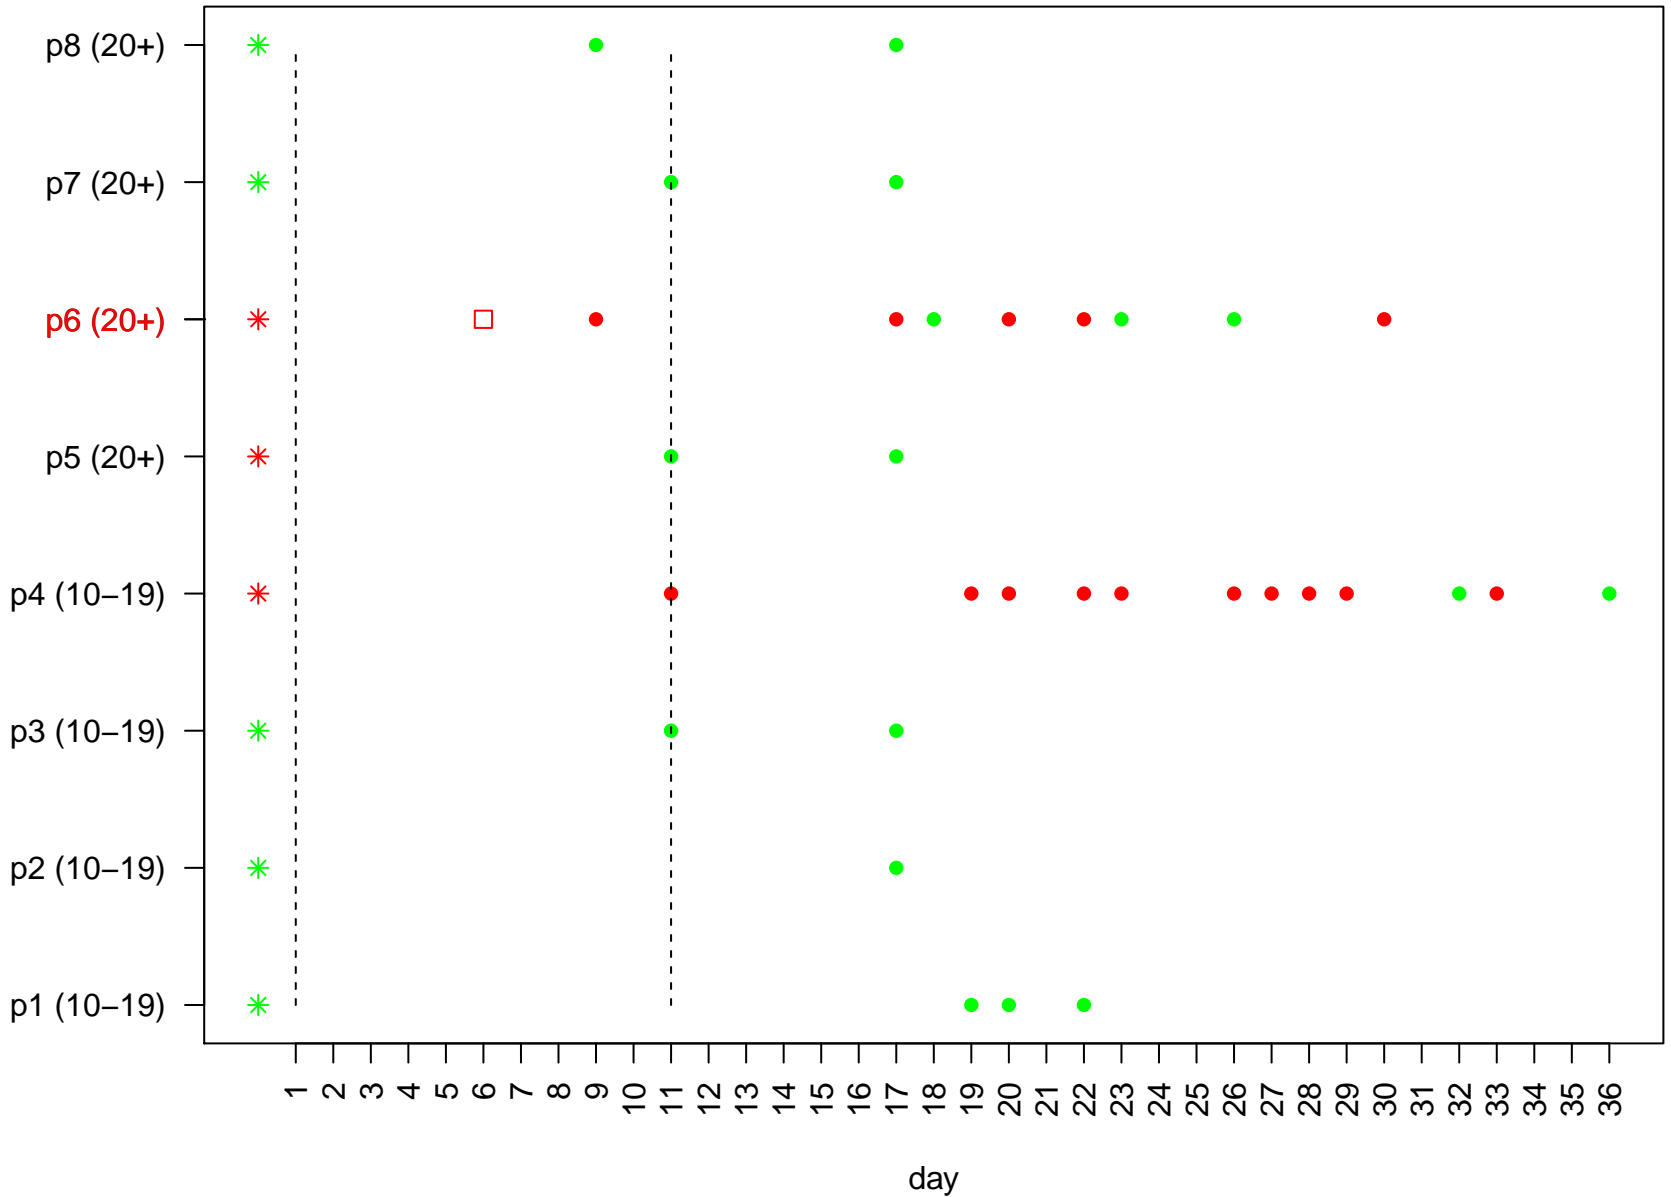



# Household 27

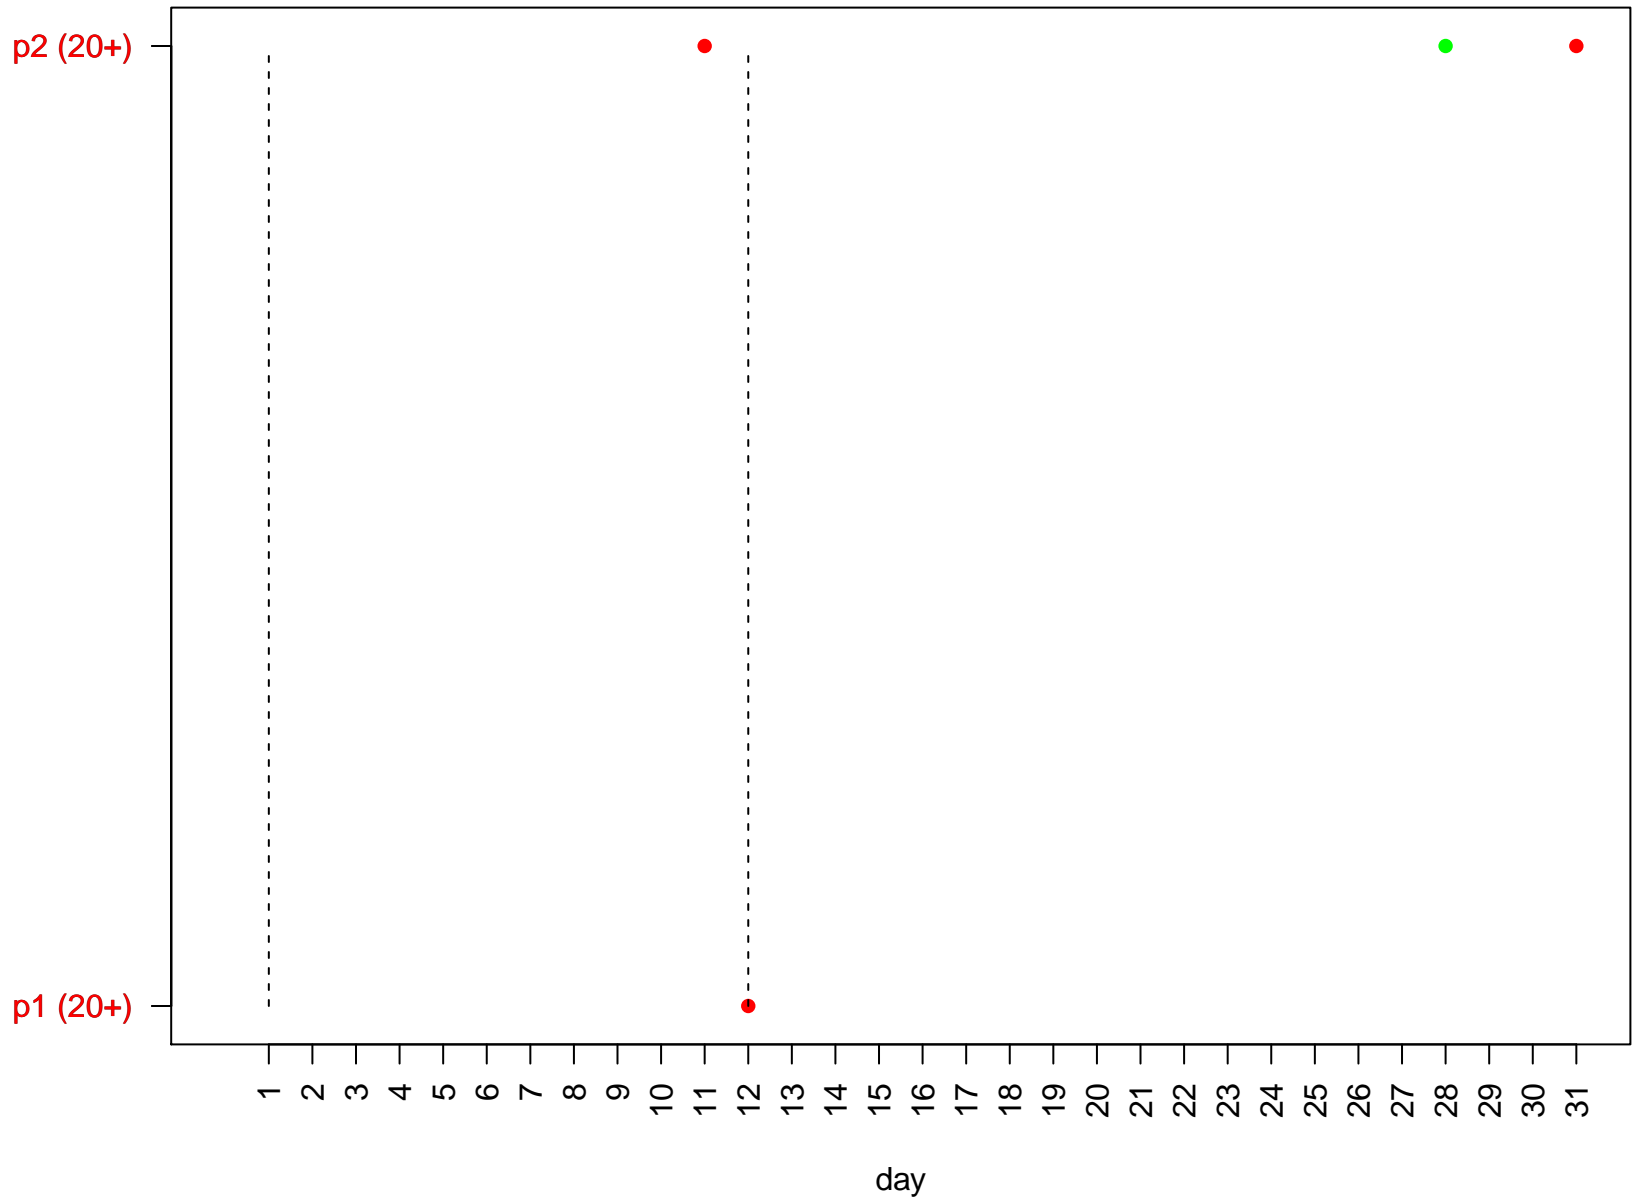



# Household 29

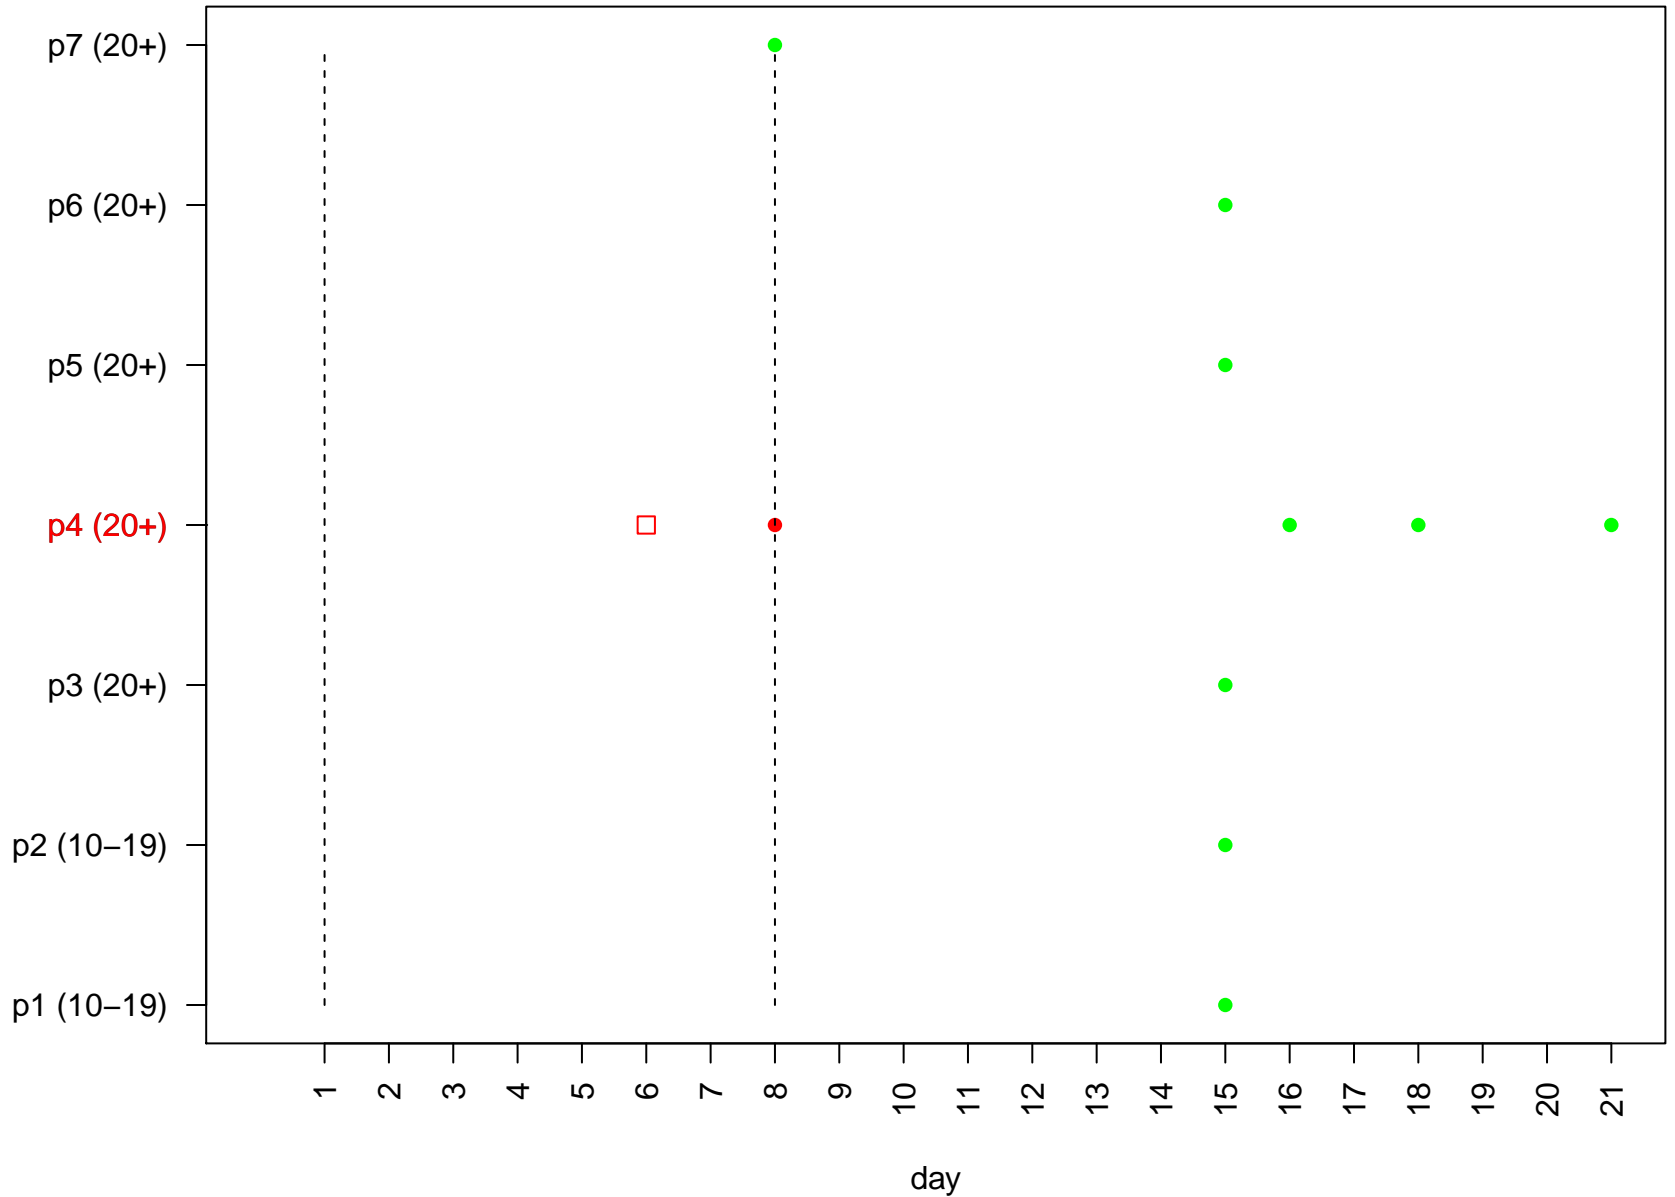

# Household 30

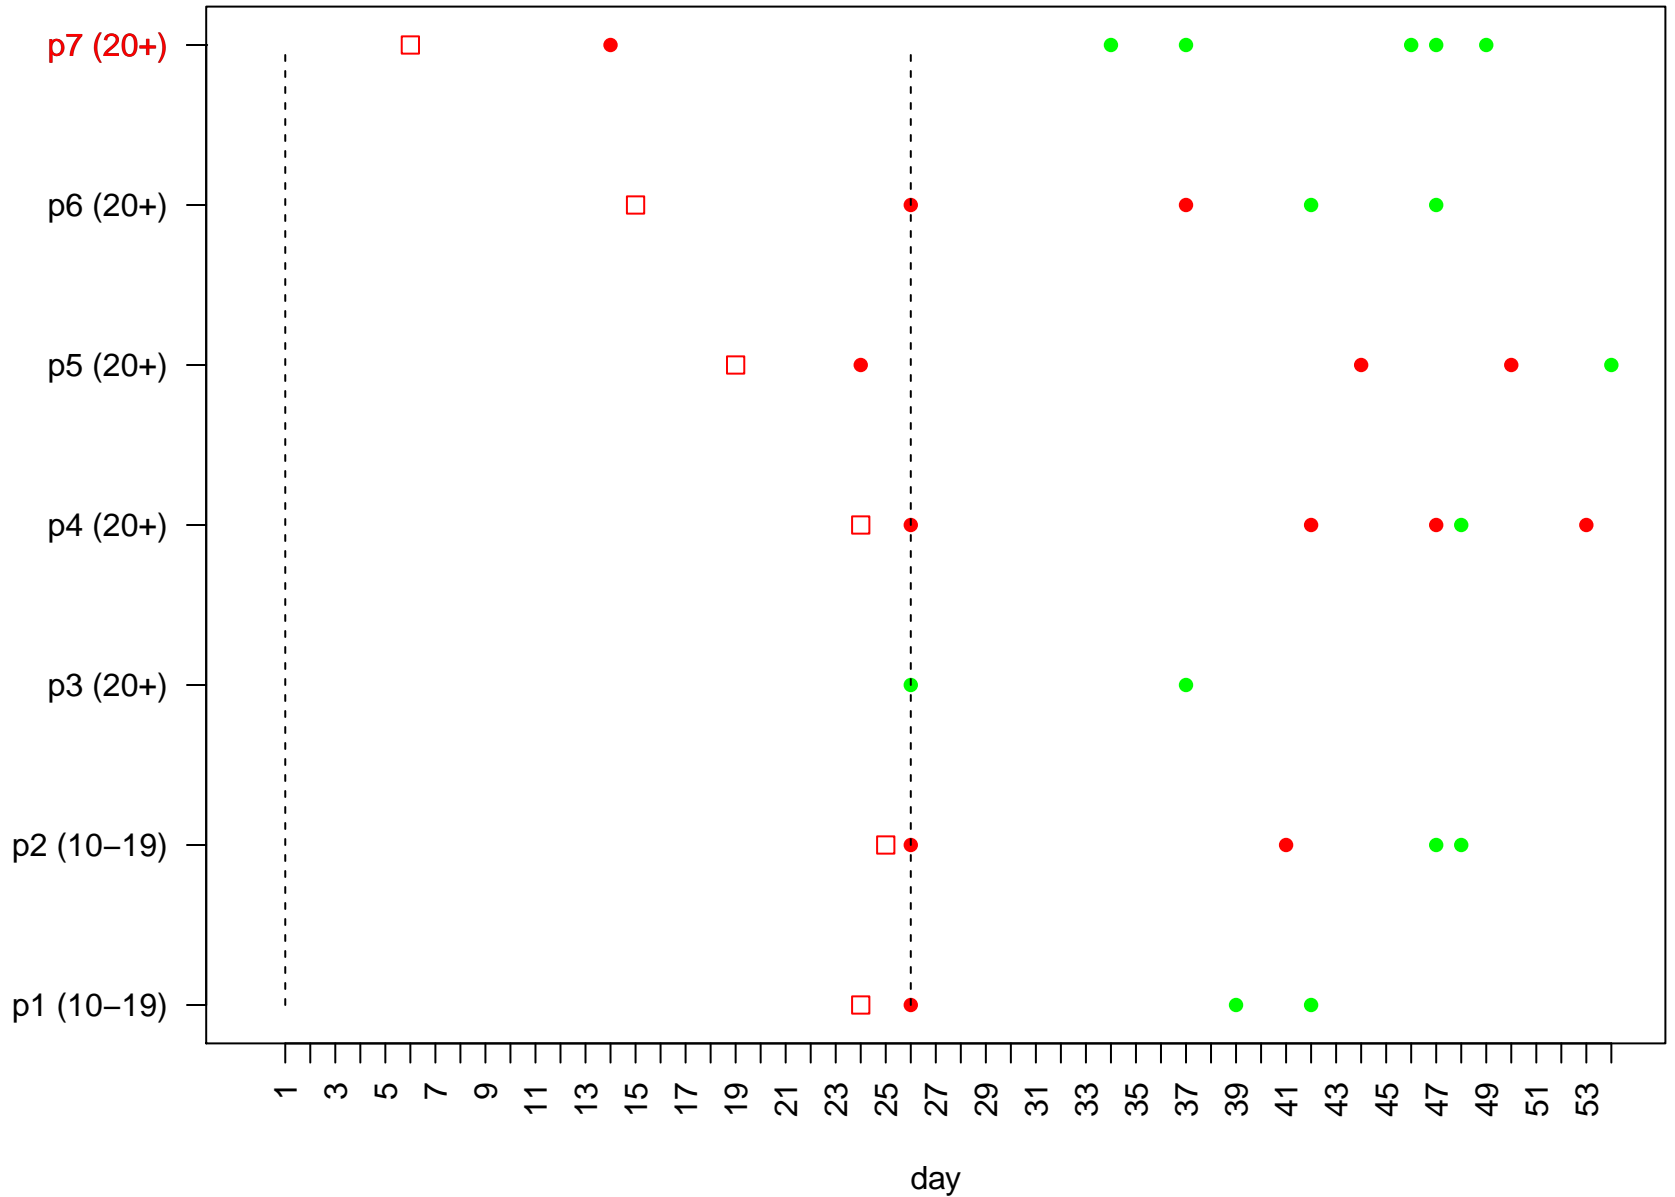

# Household 31

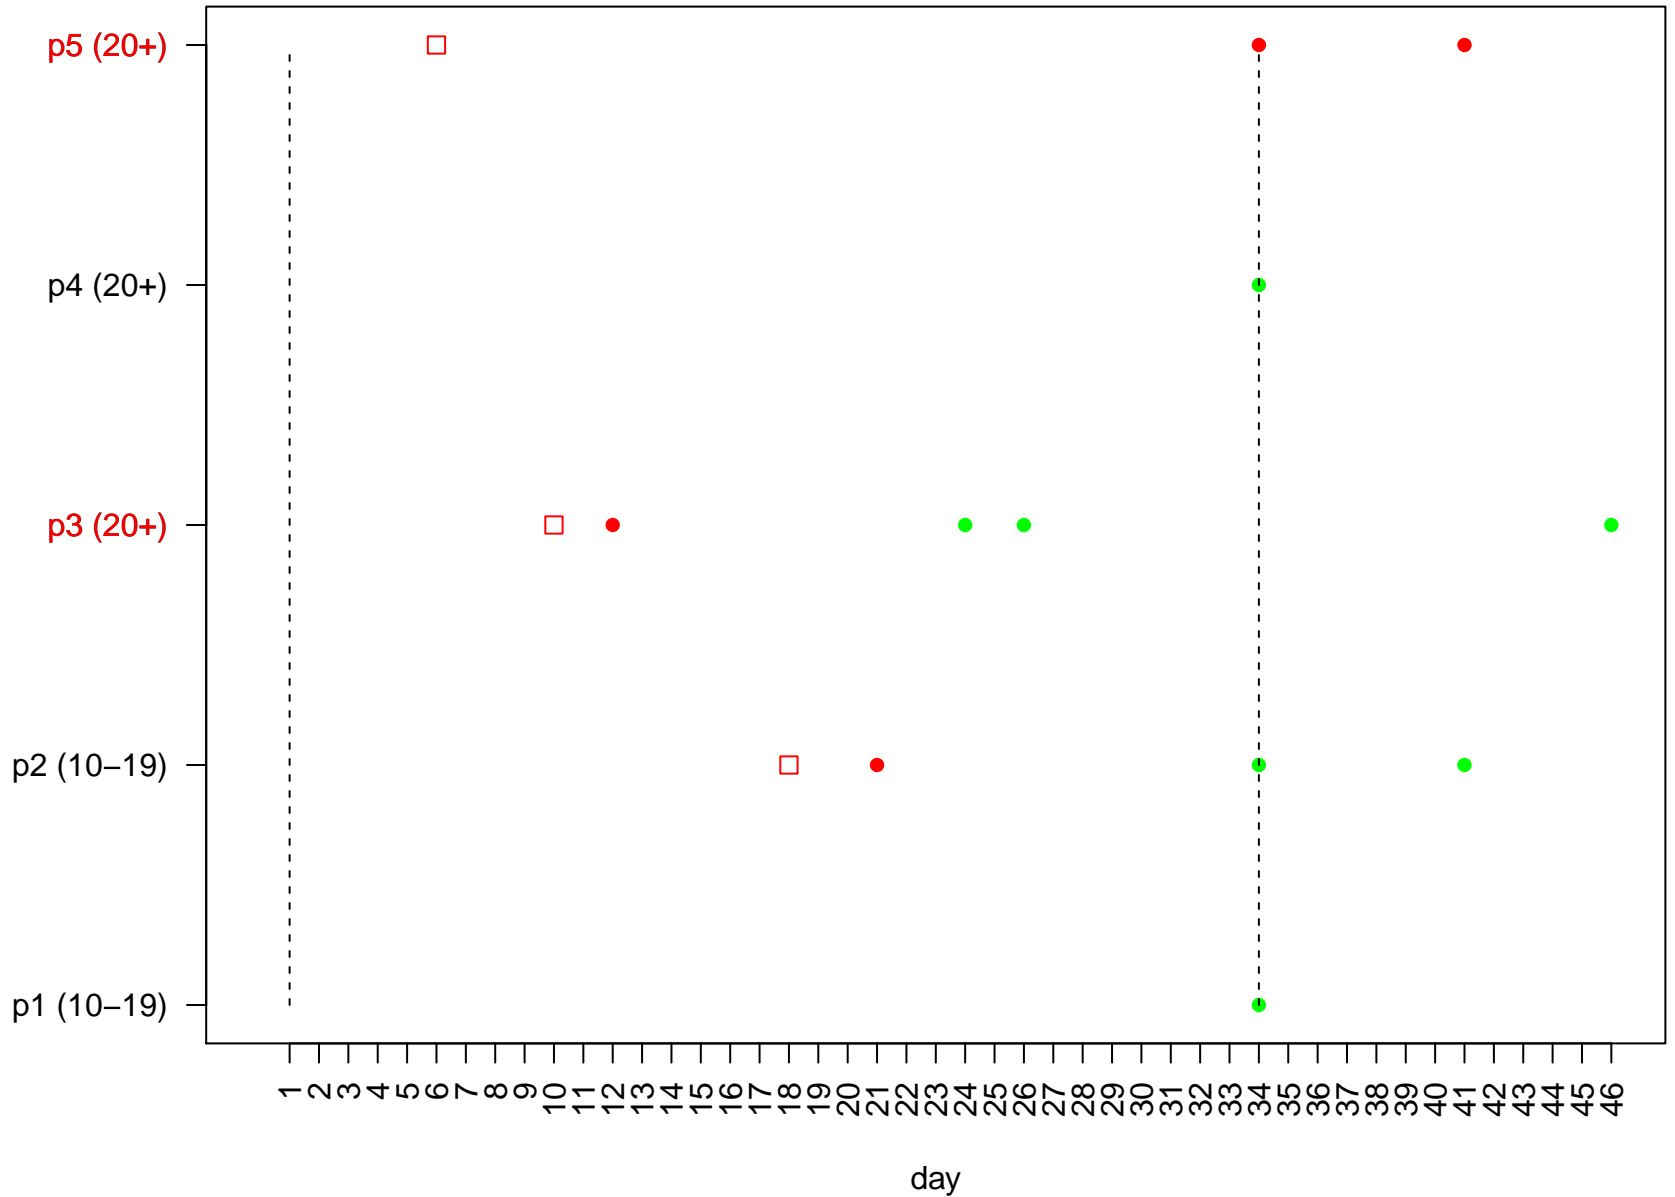

# Household 32

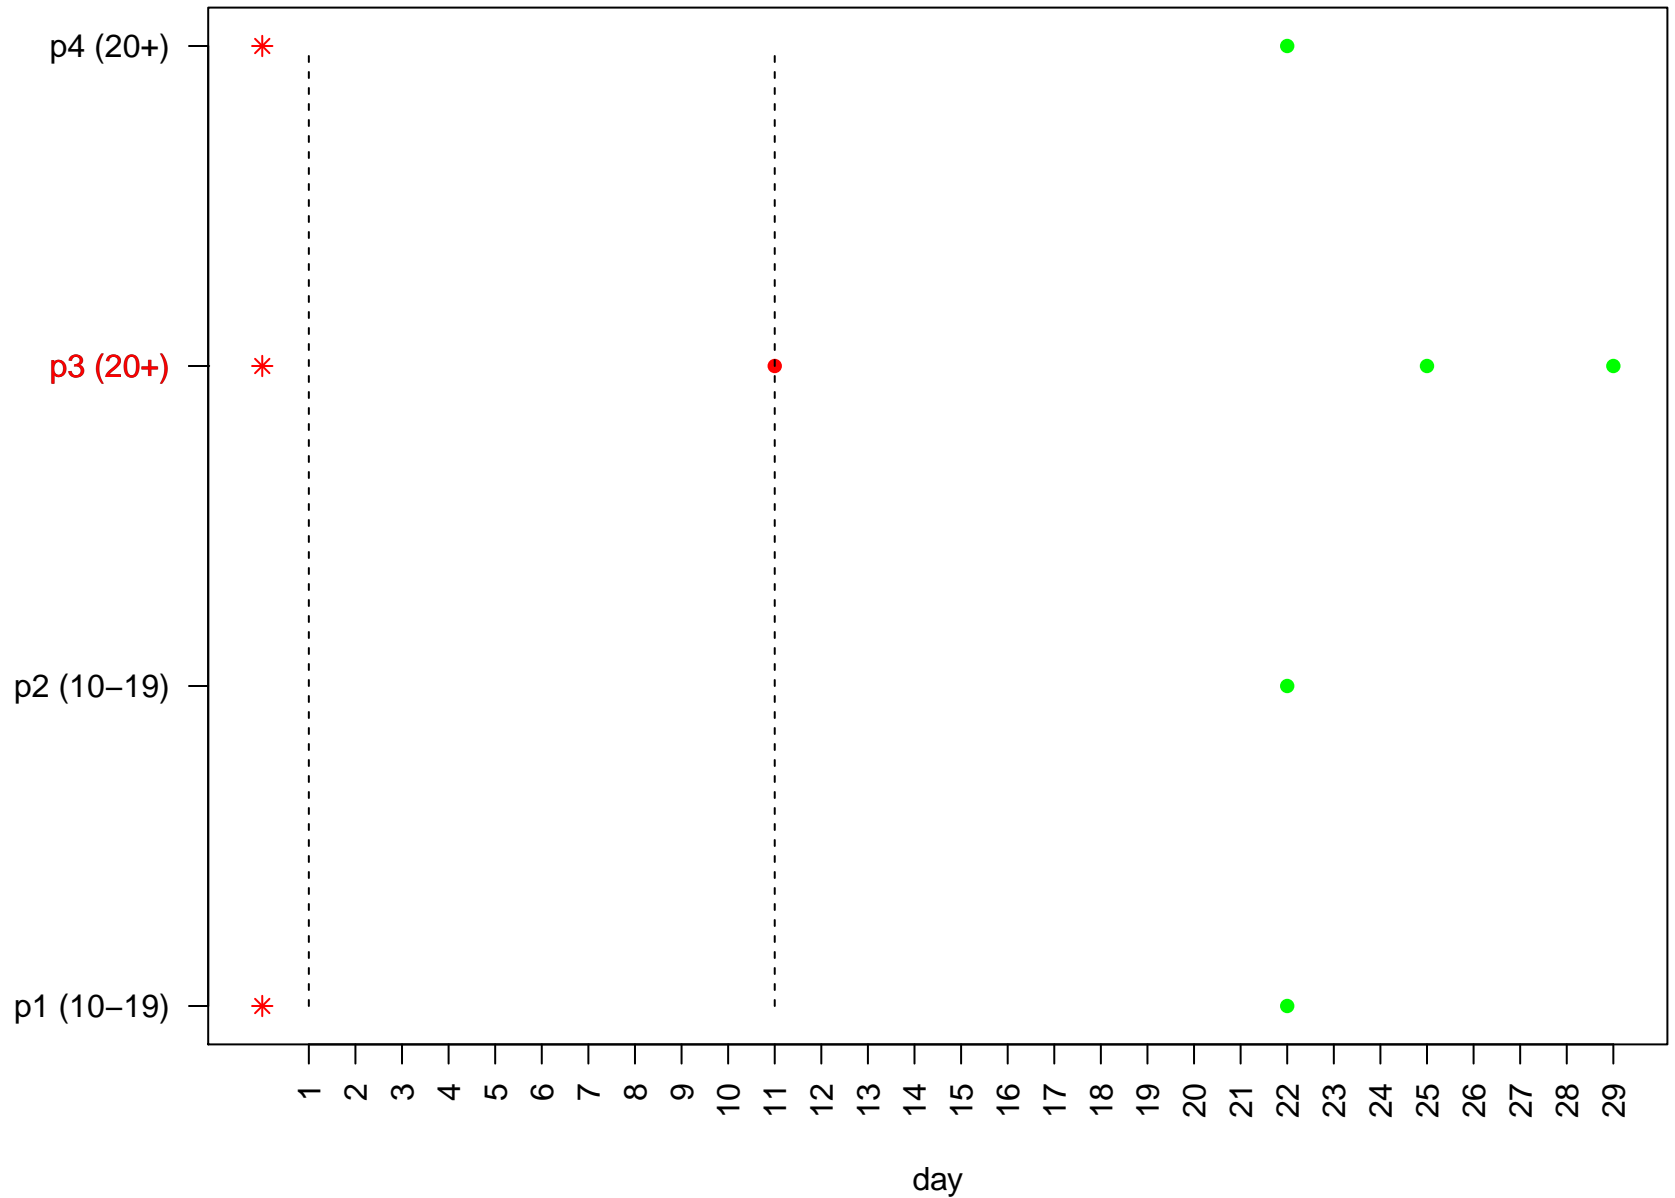

# Household 33

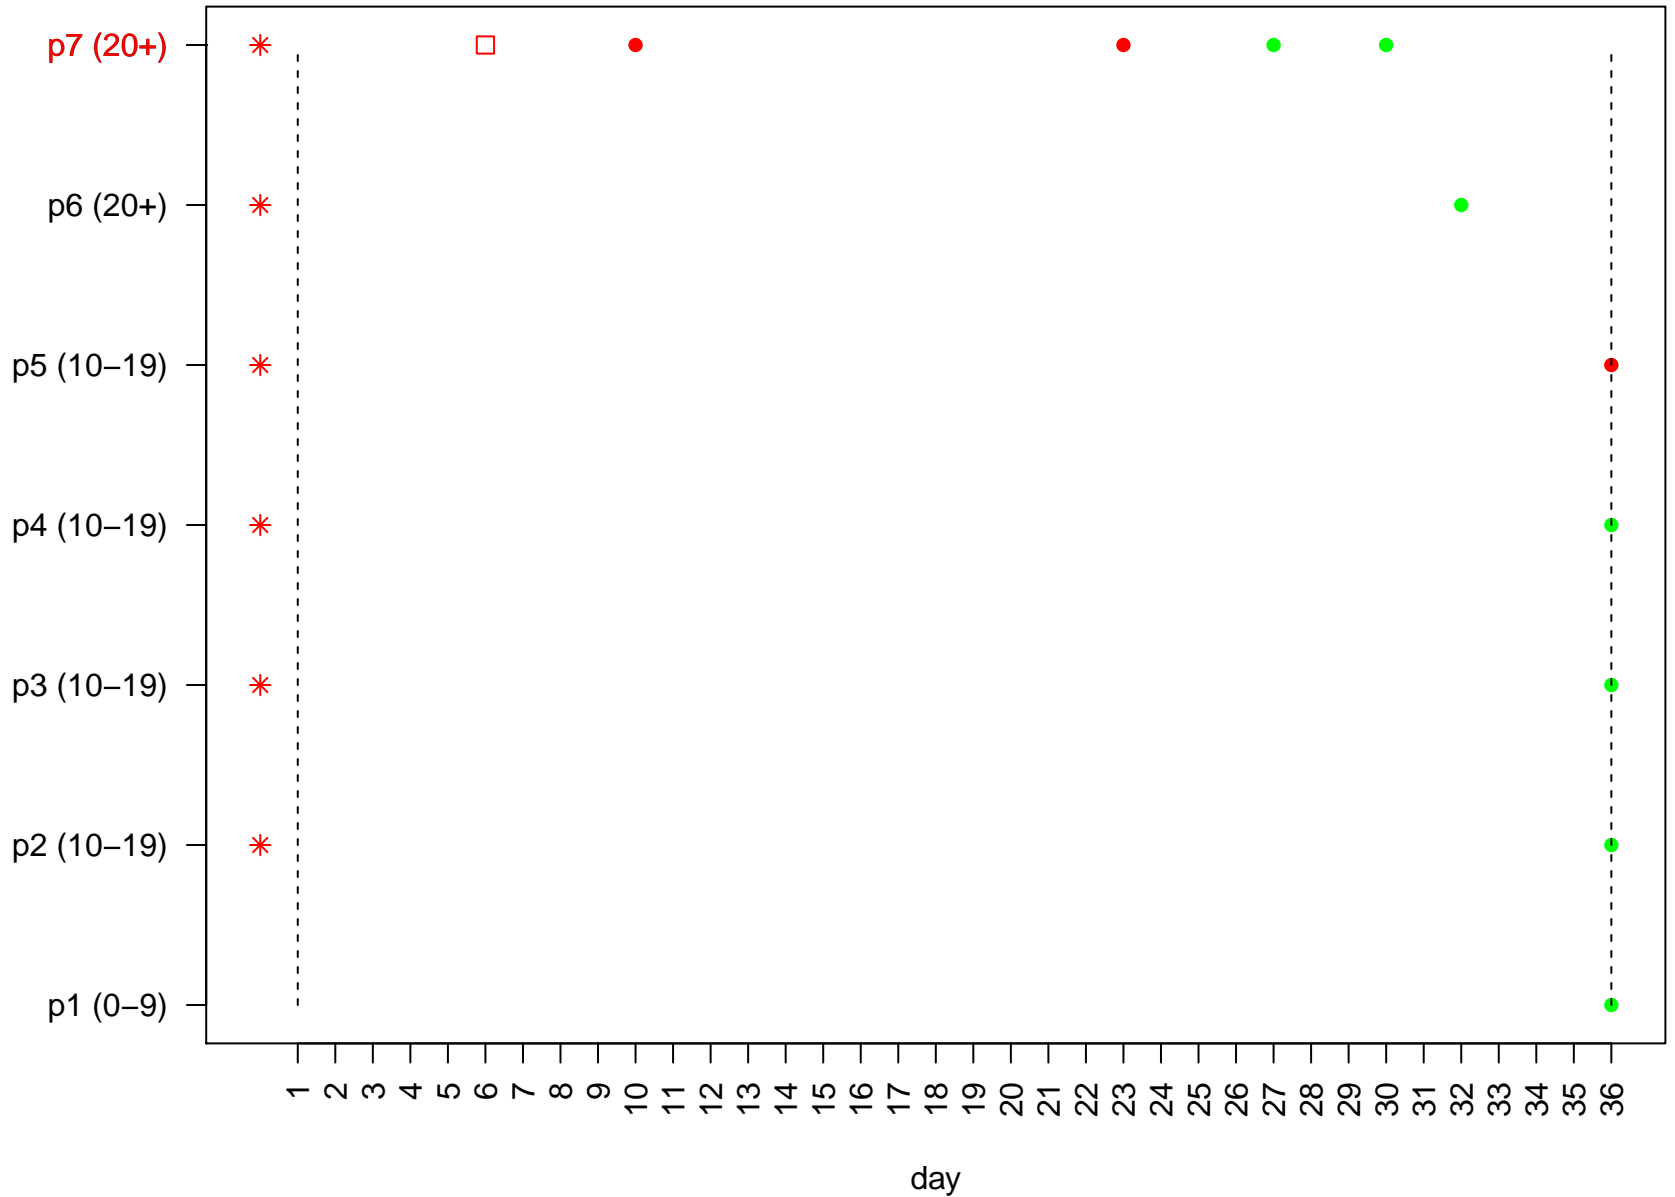





# Household 35

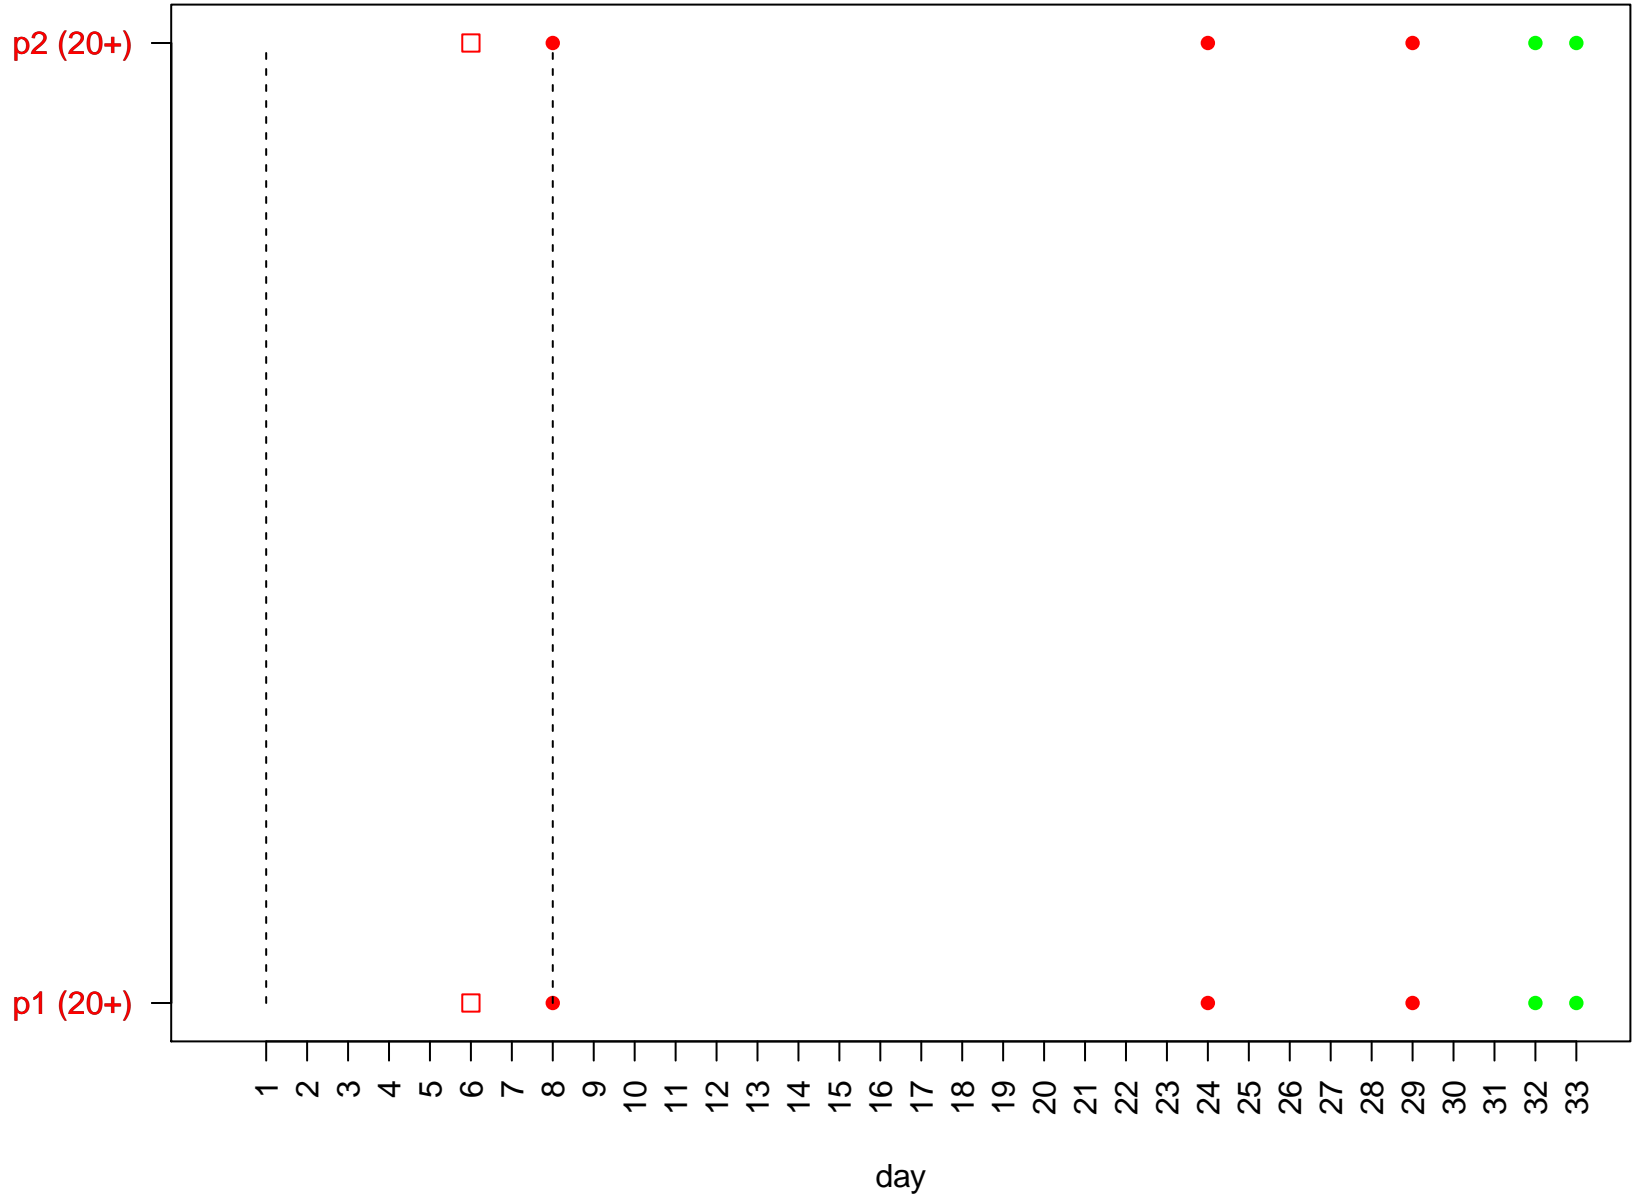

# Household 36

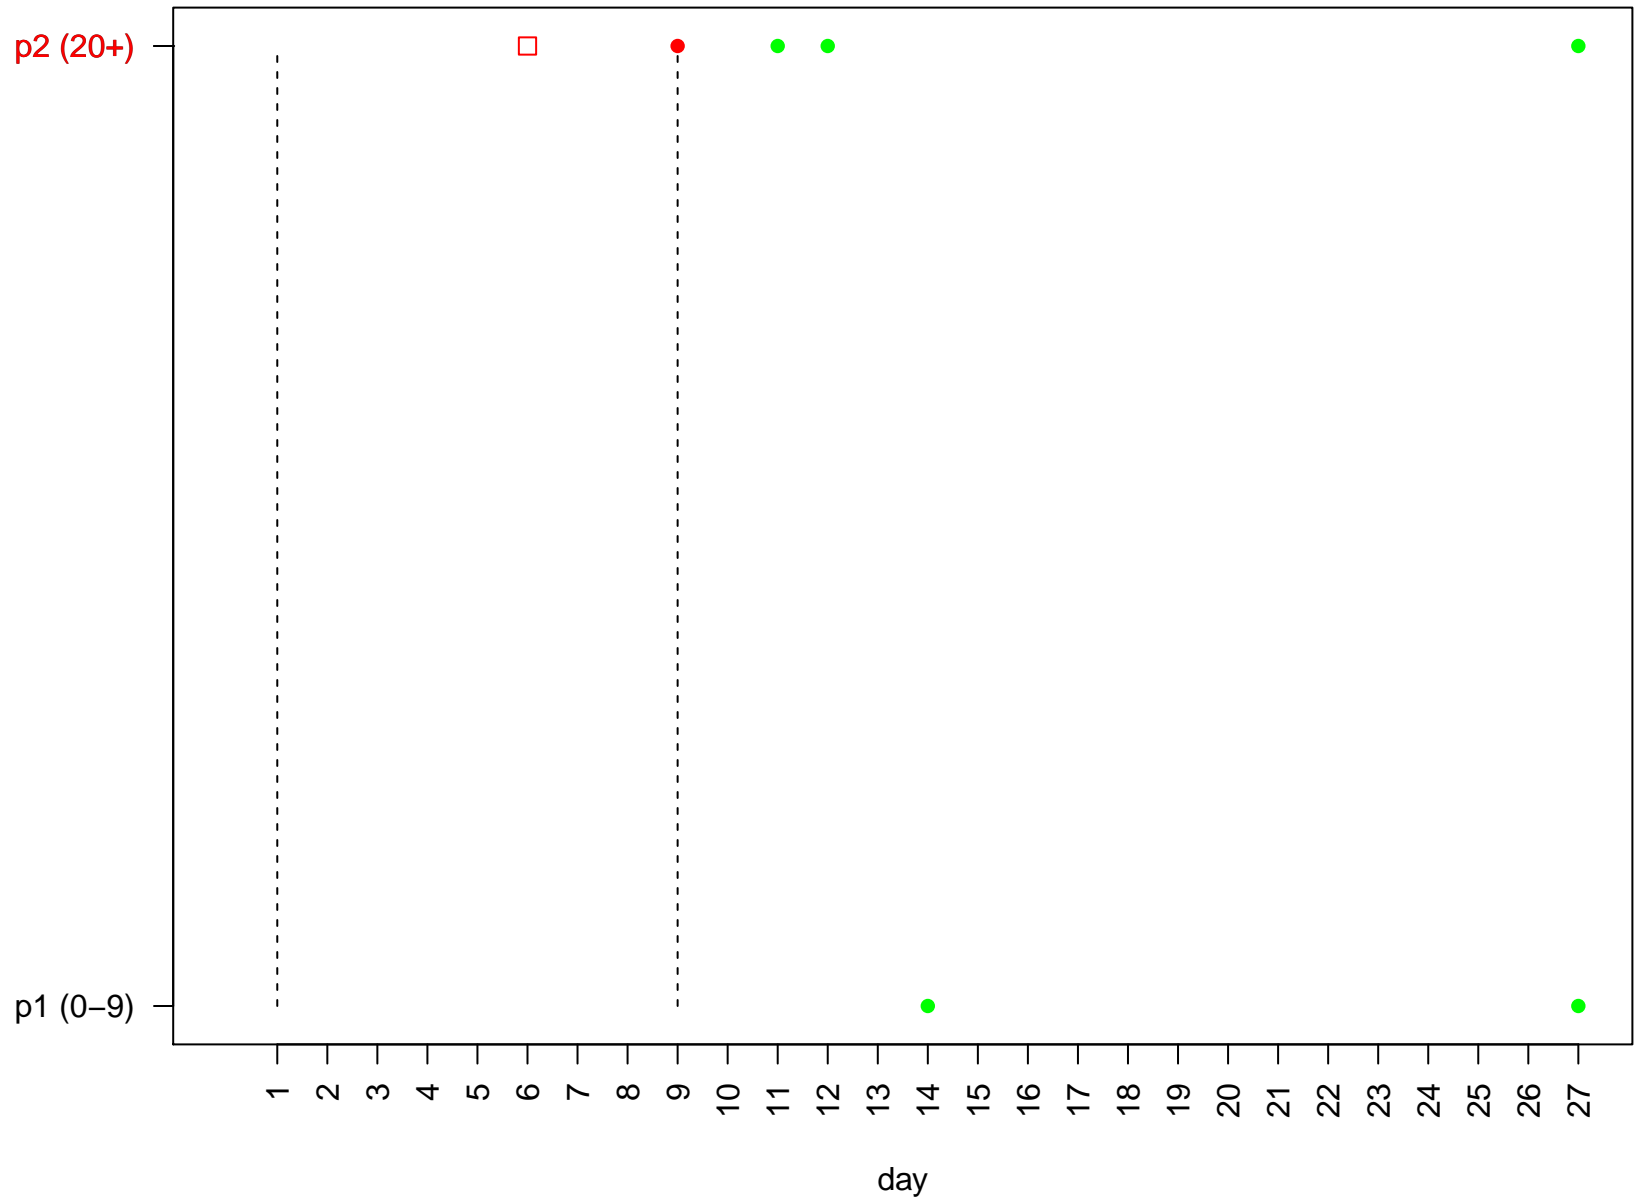

# Household 37

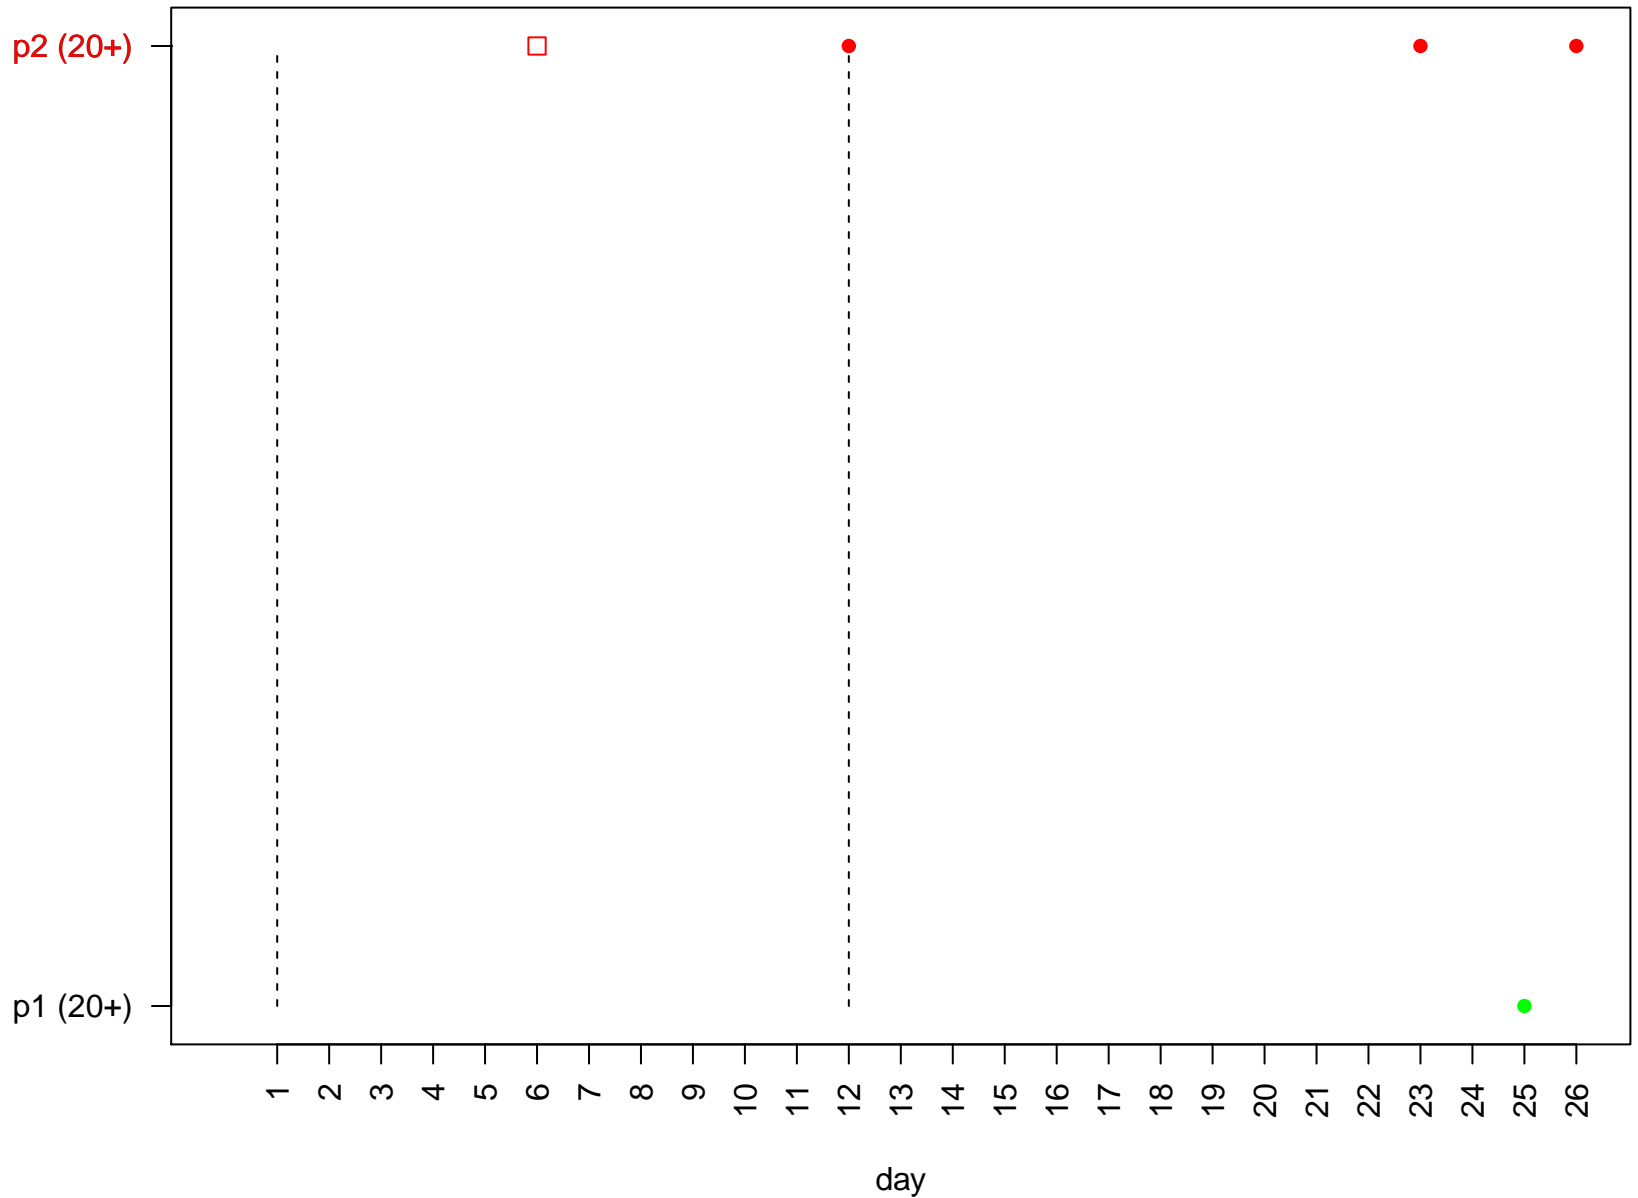



# Household 39

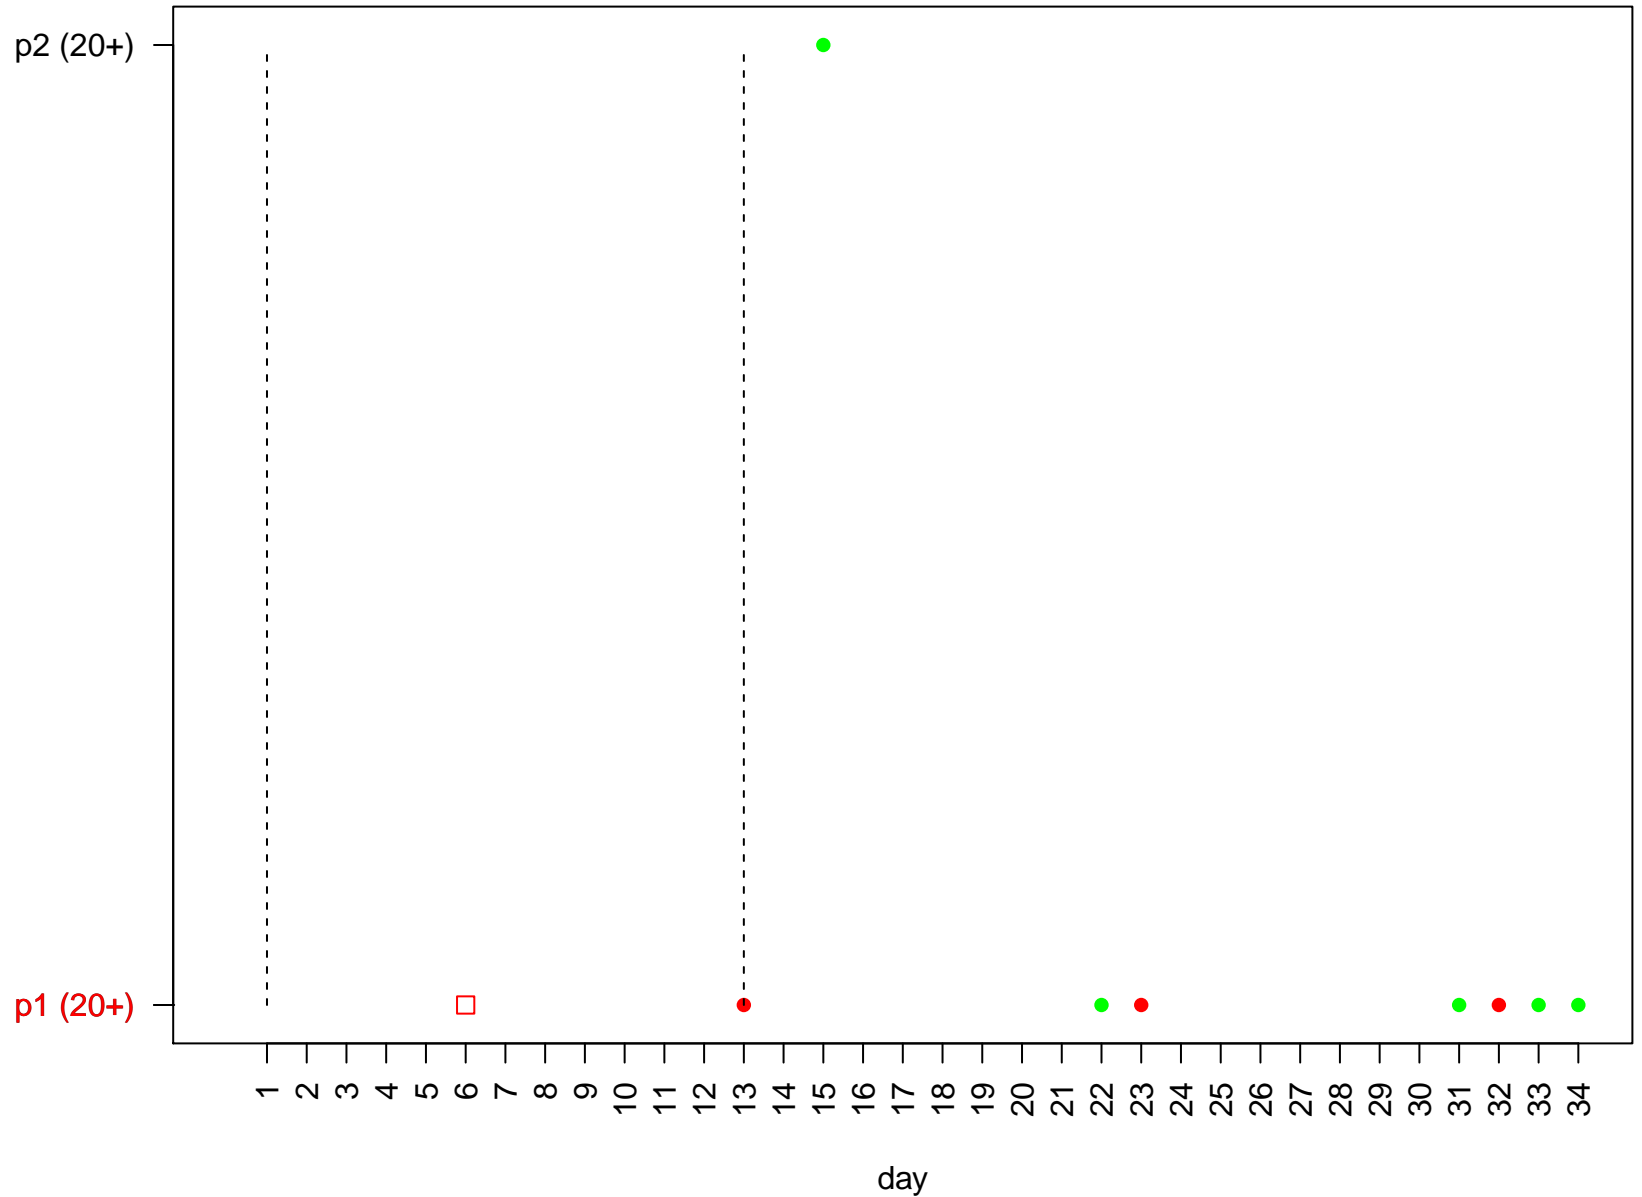

# Household 40

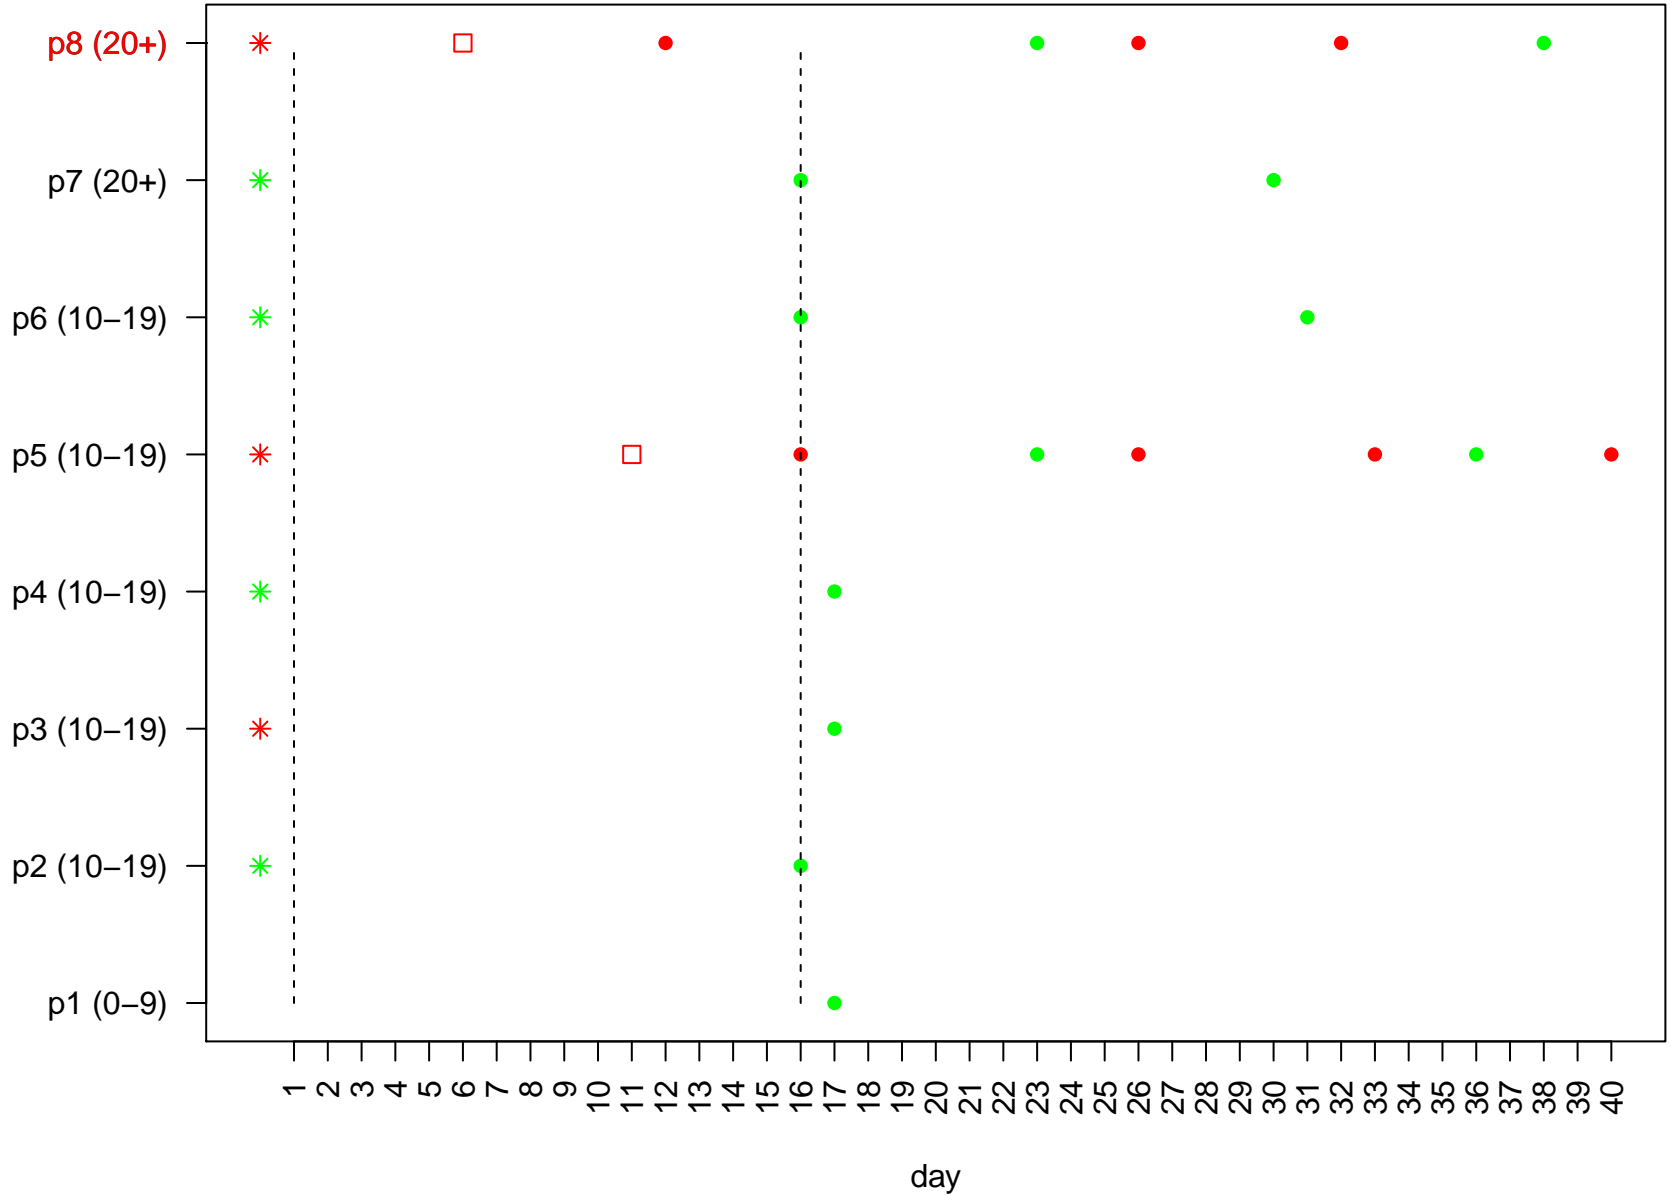

# Household 41

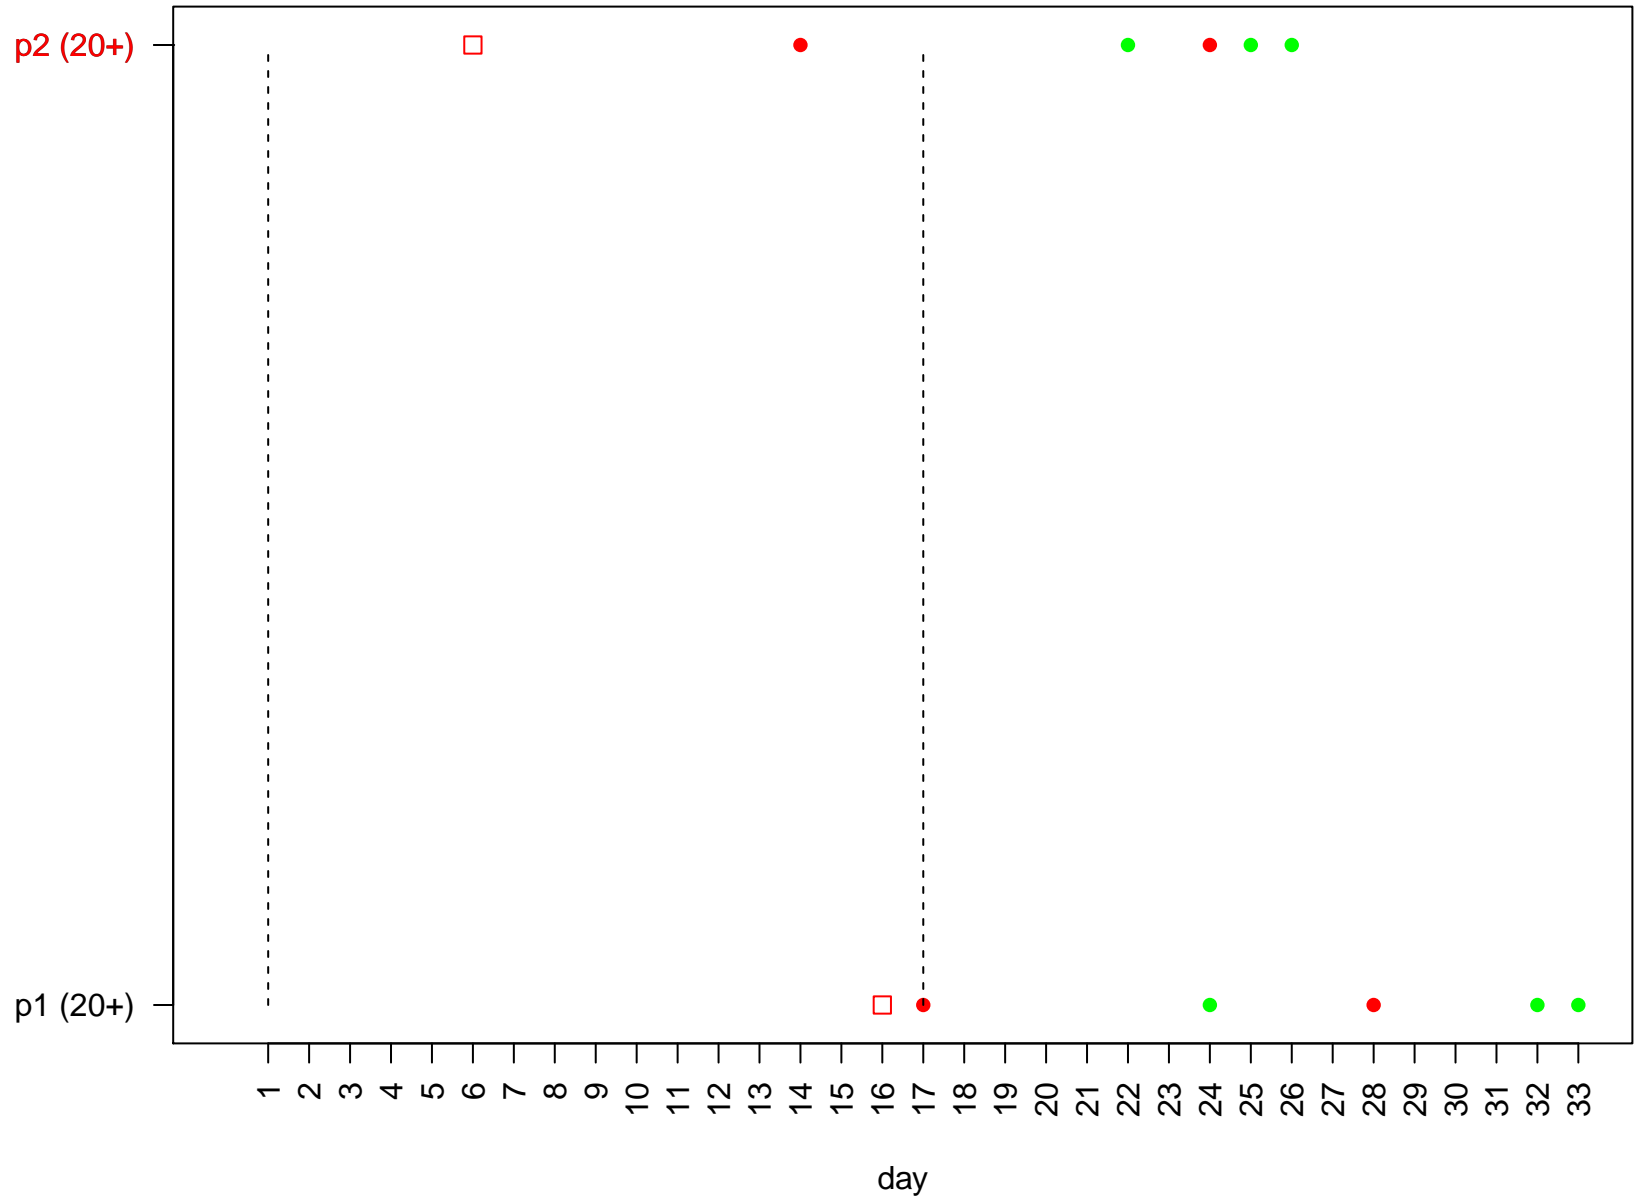

# Household 42

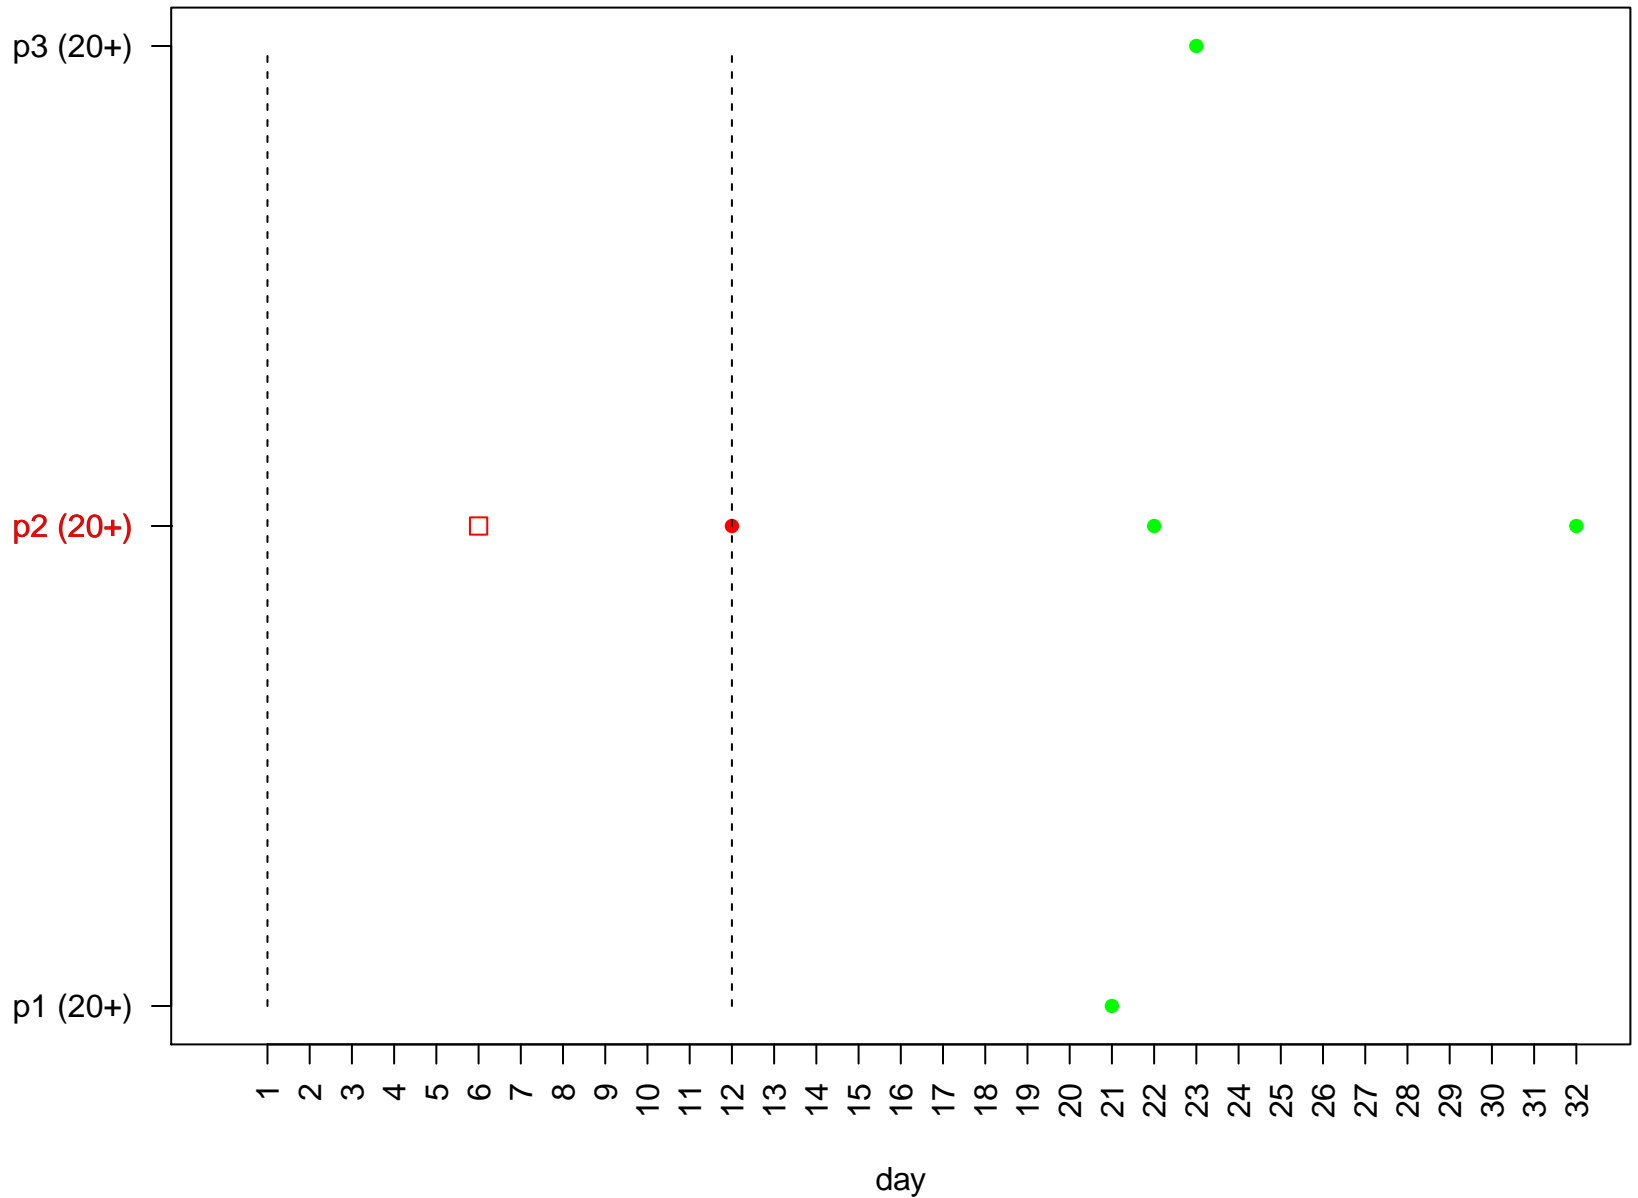



# Household 43

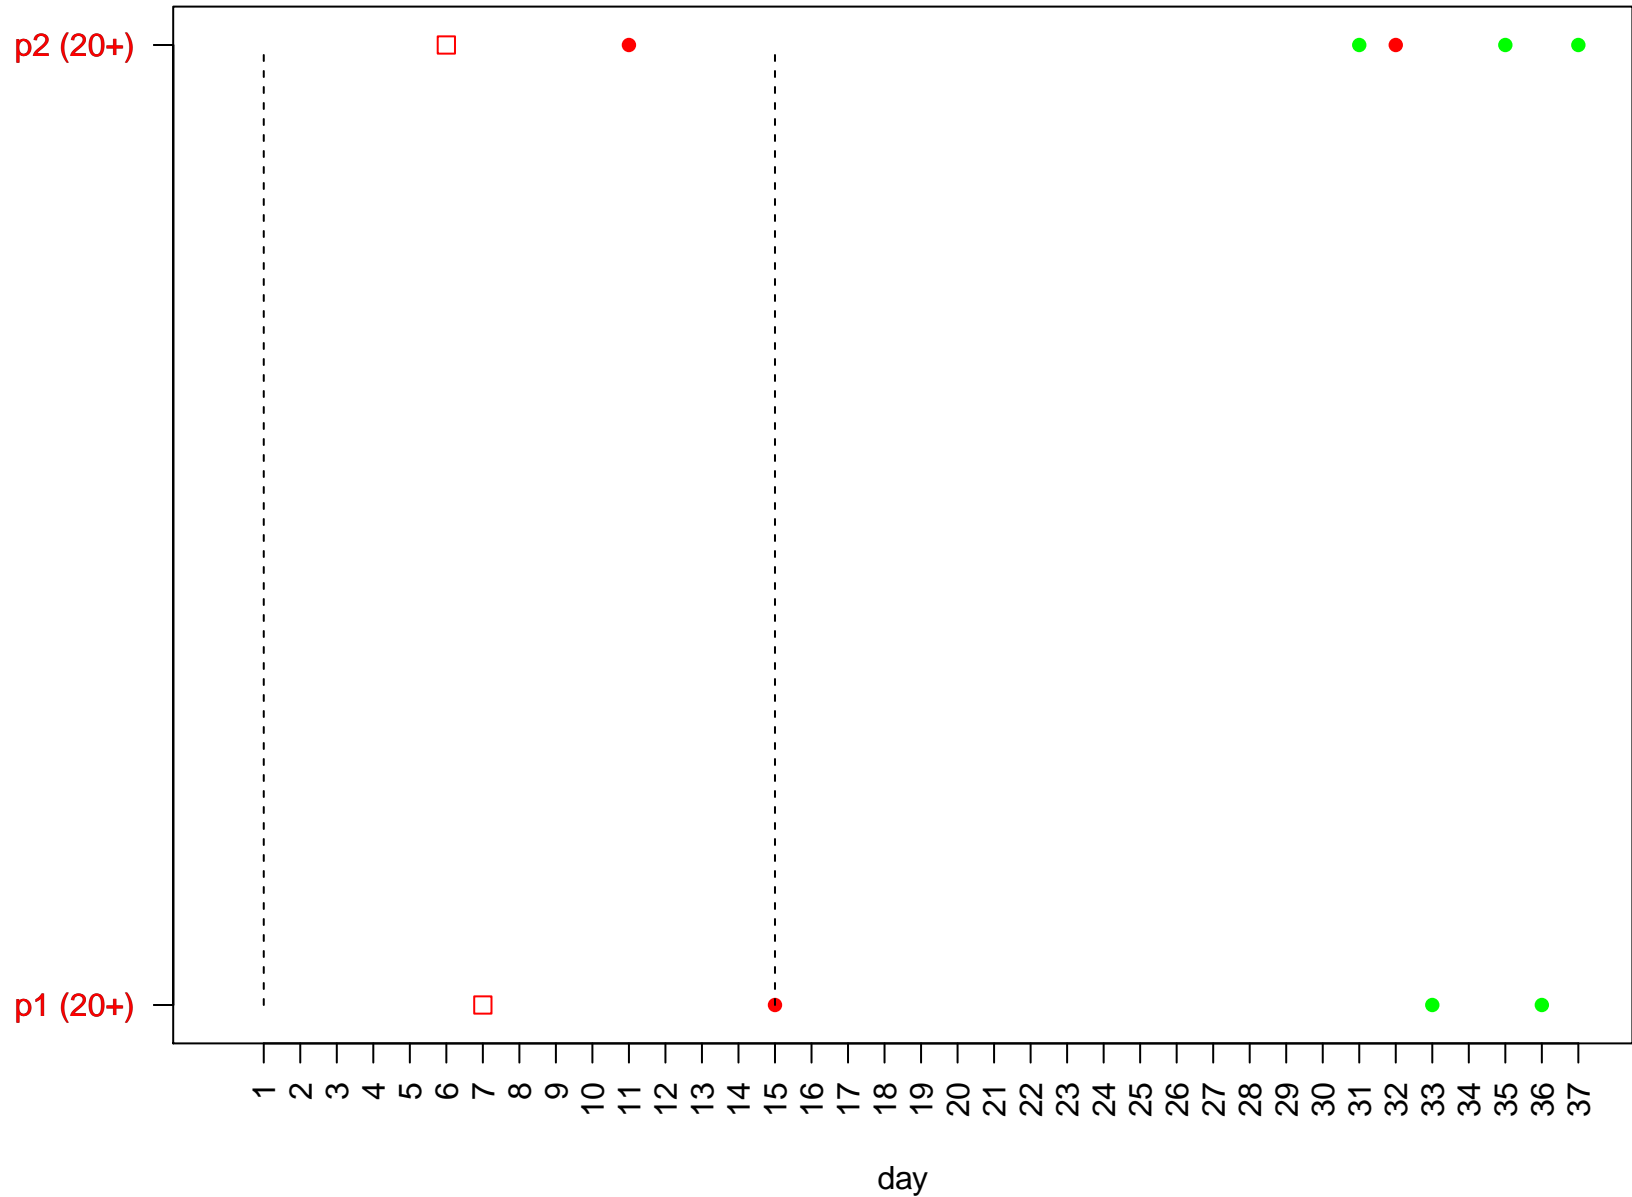

# Household 44

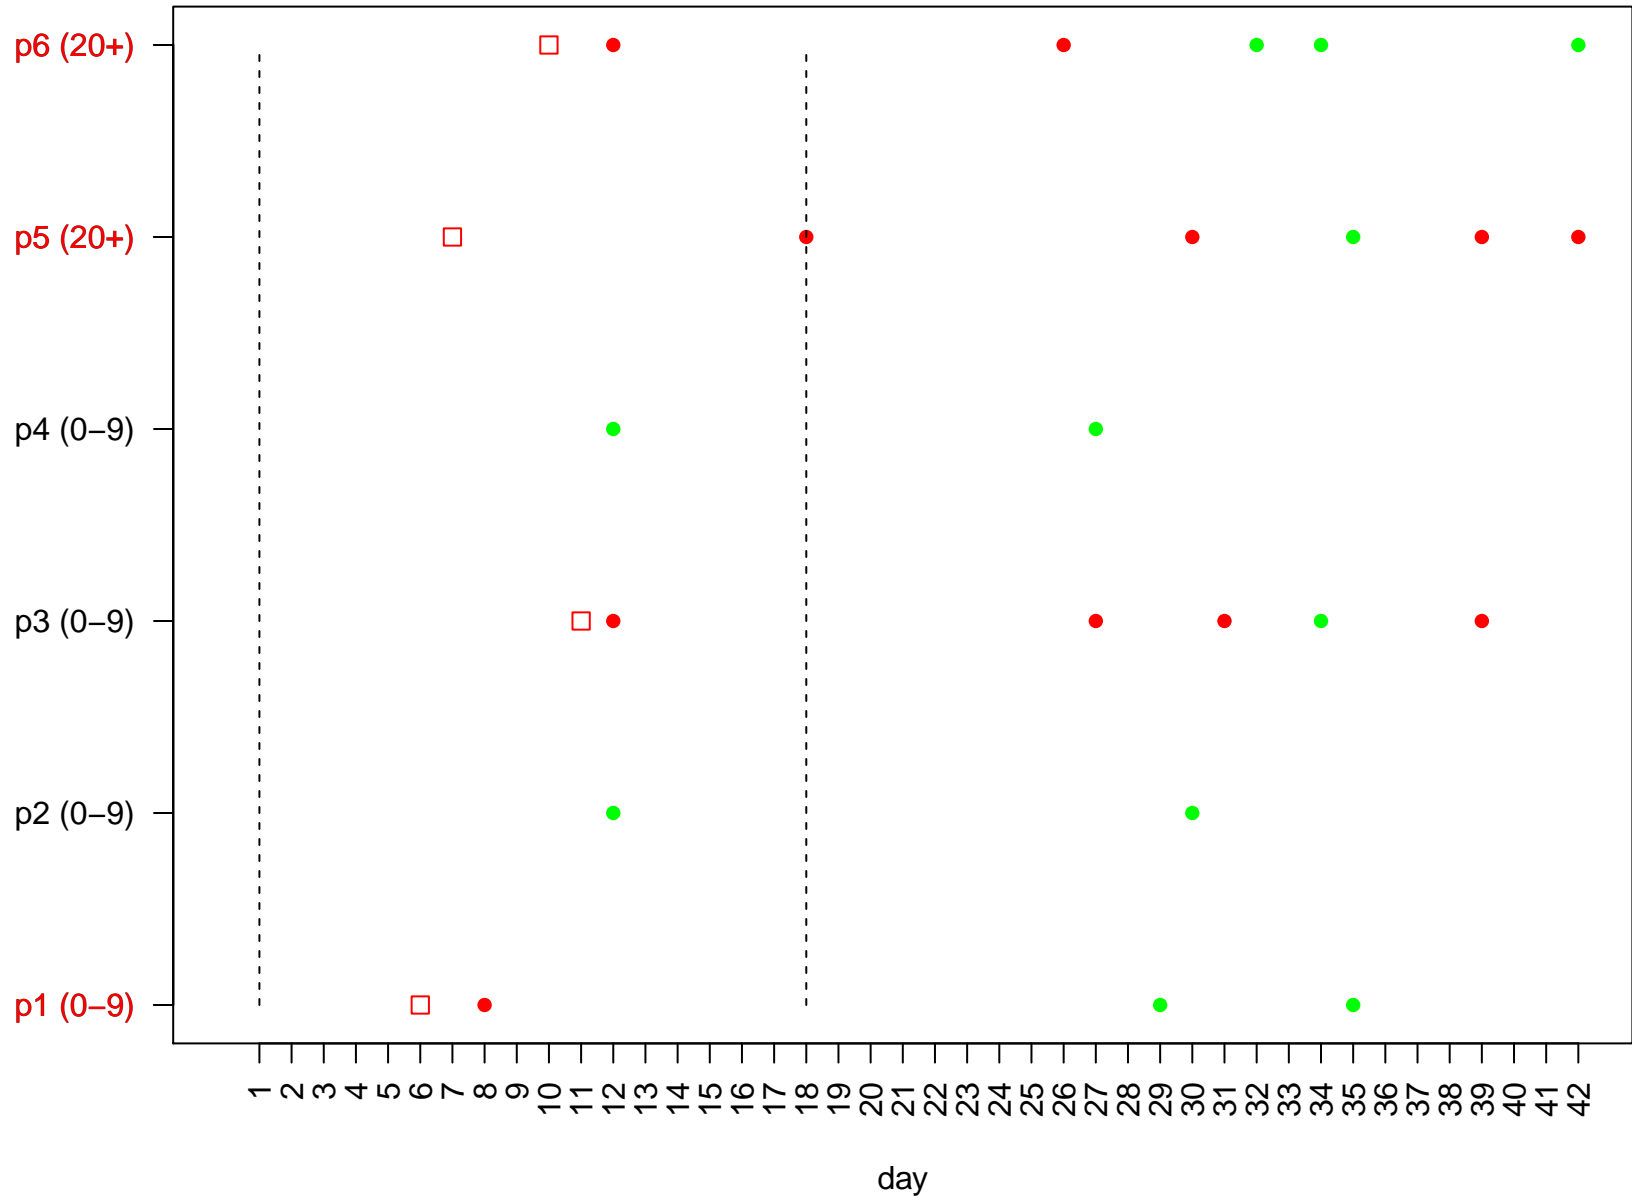

# Household 45

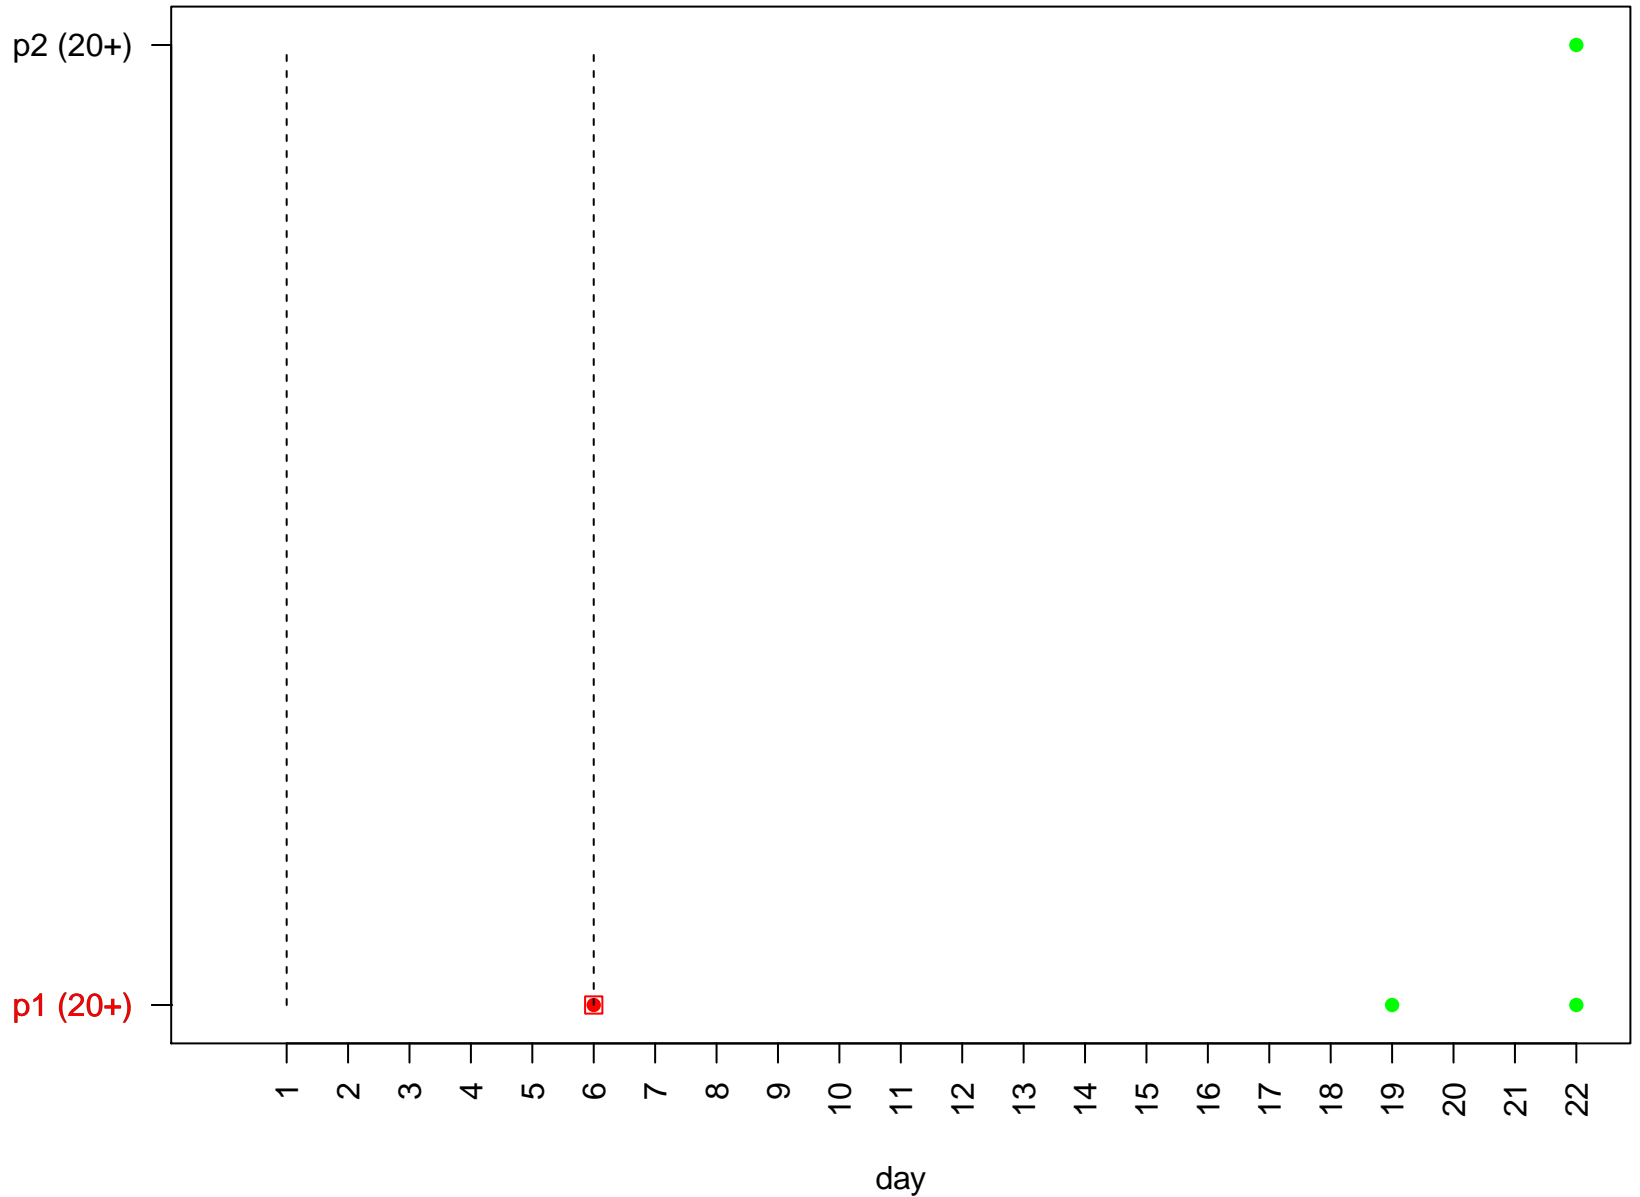

# Household 46

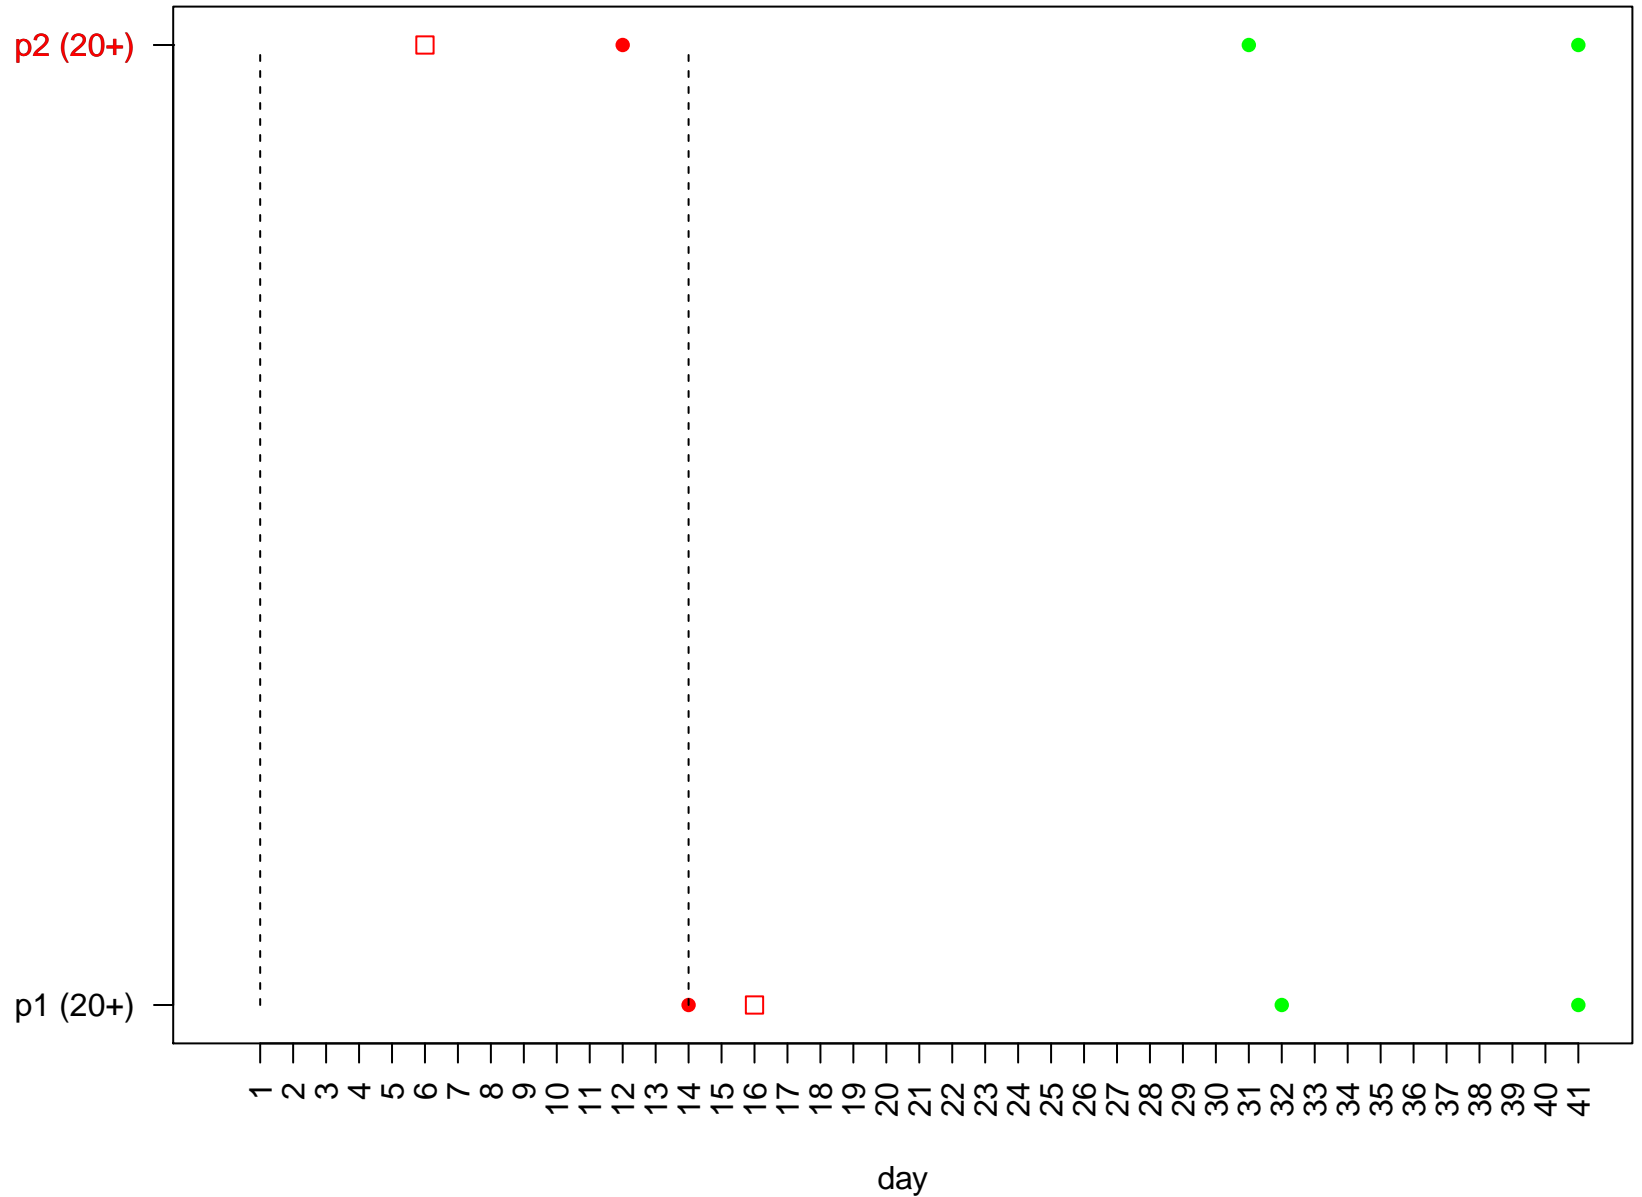

# Household 47

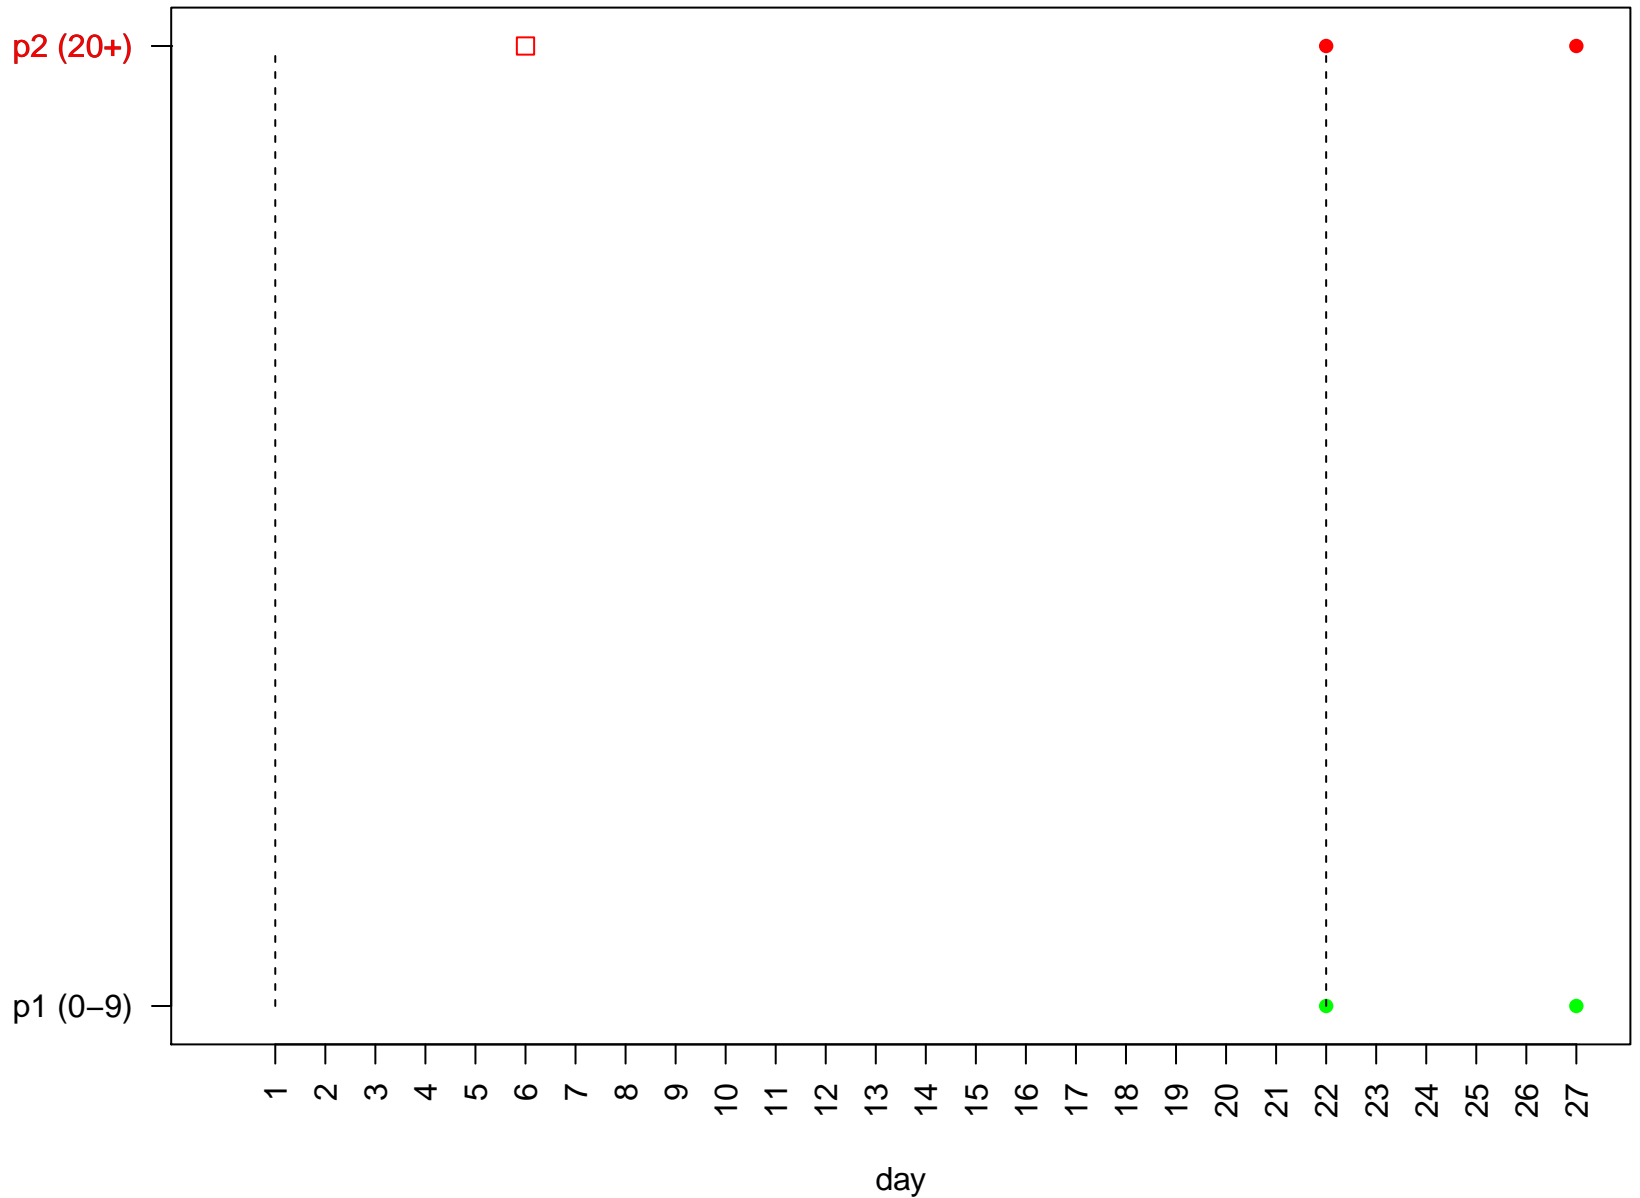

# Household 48

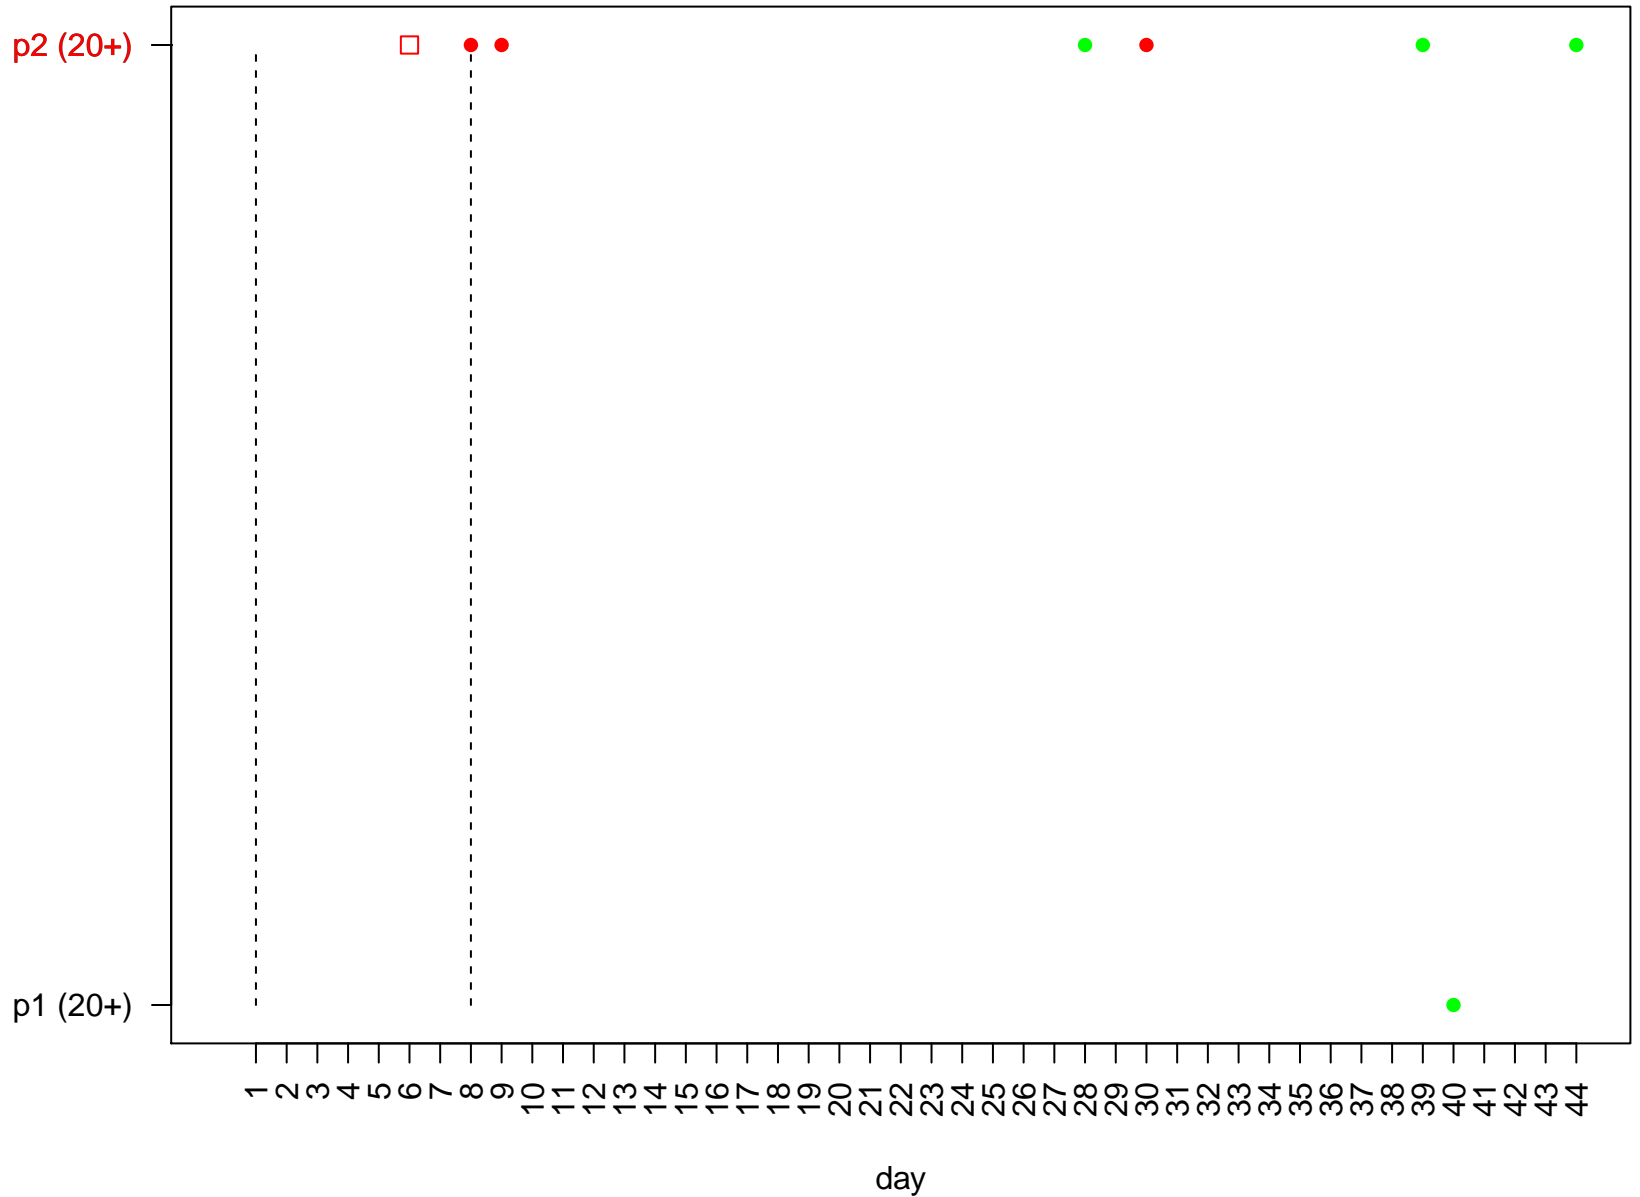

# Household 49

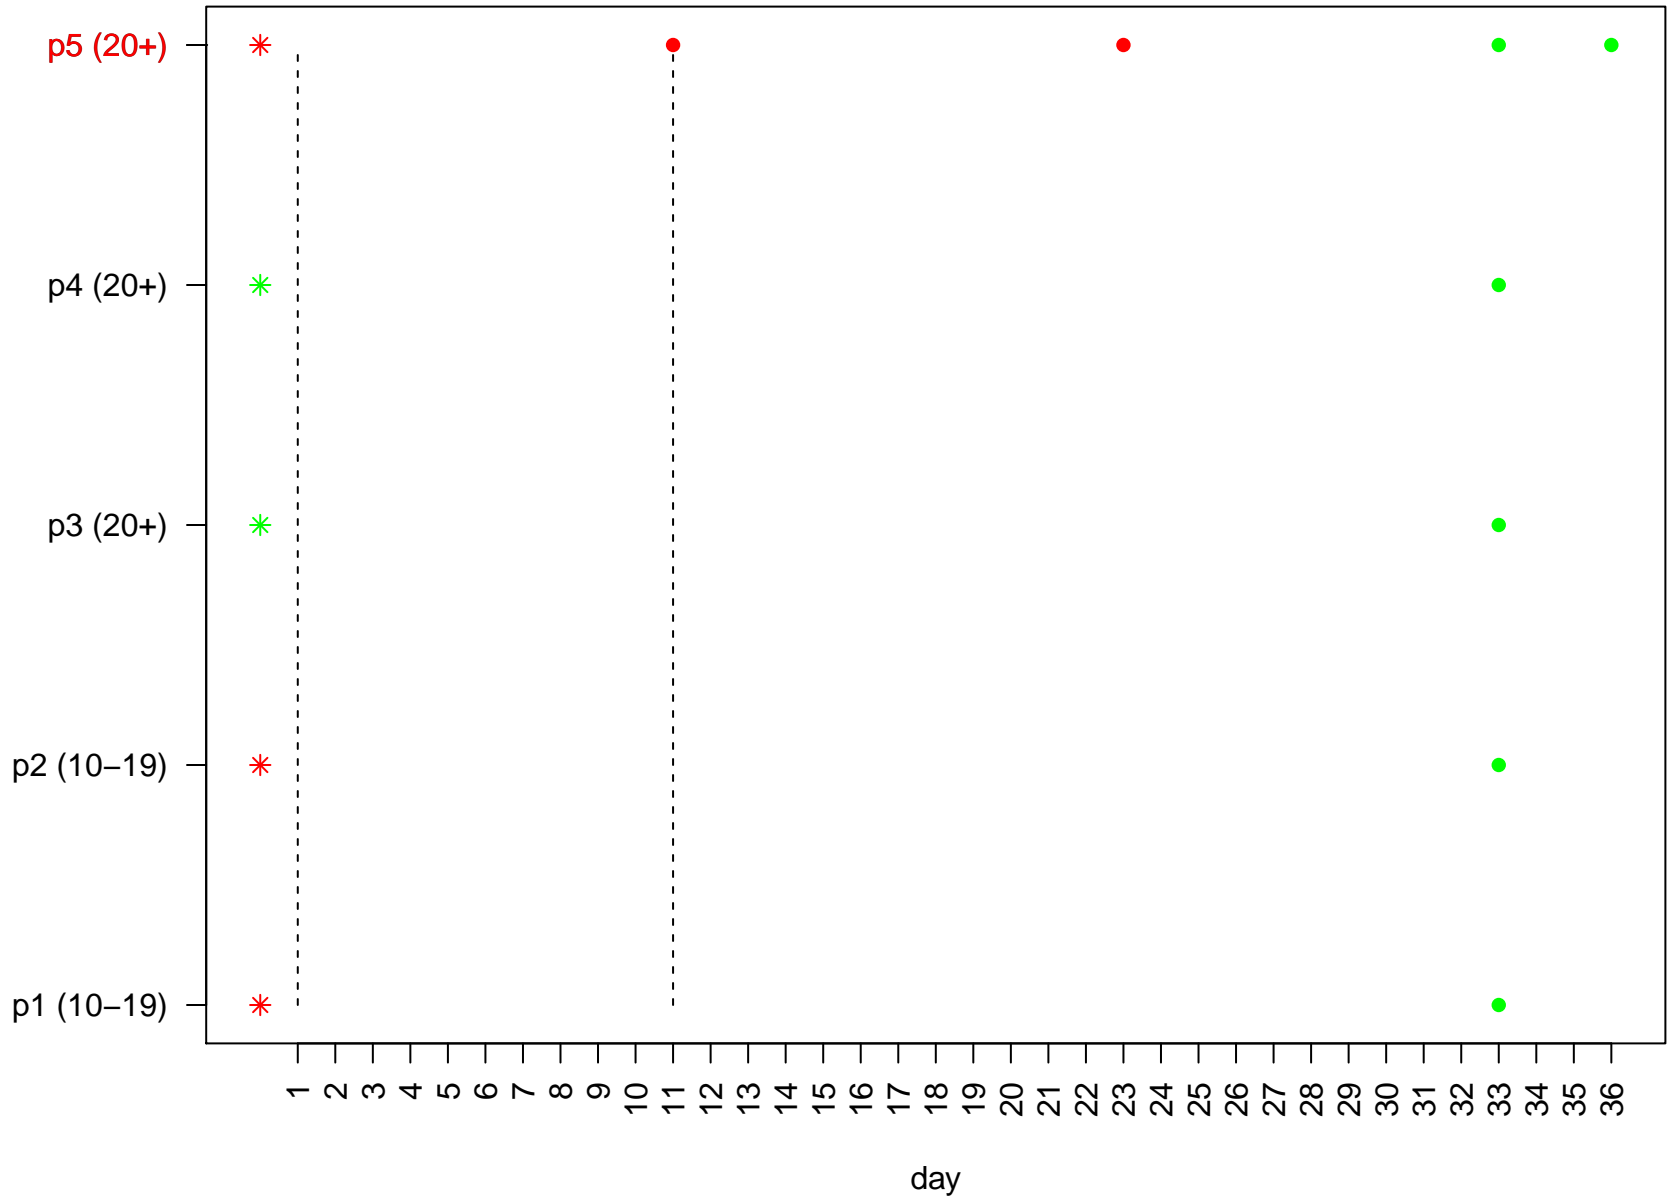

# Household 50

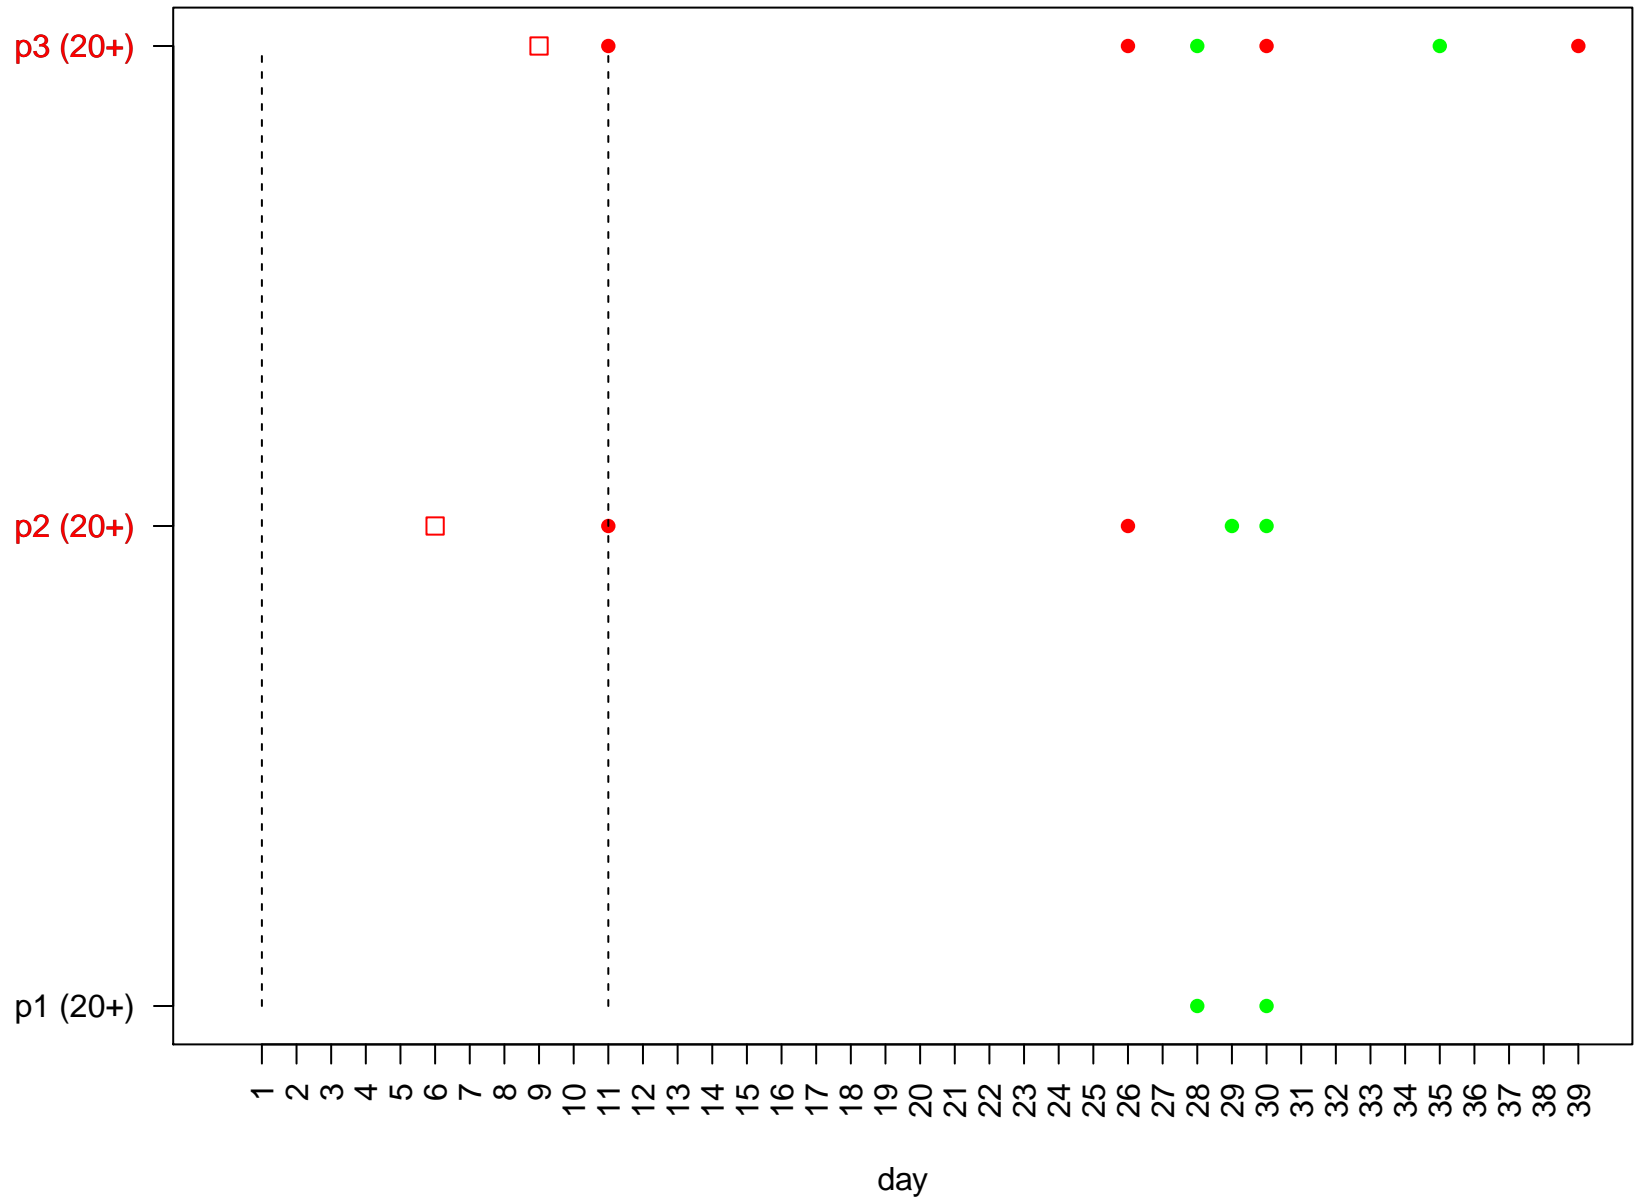



# Household 51

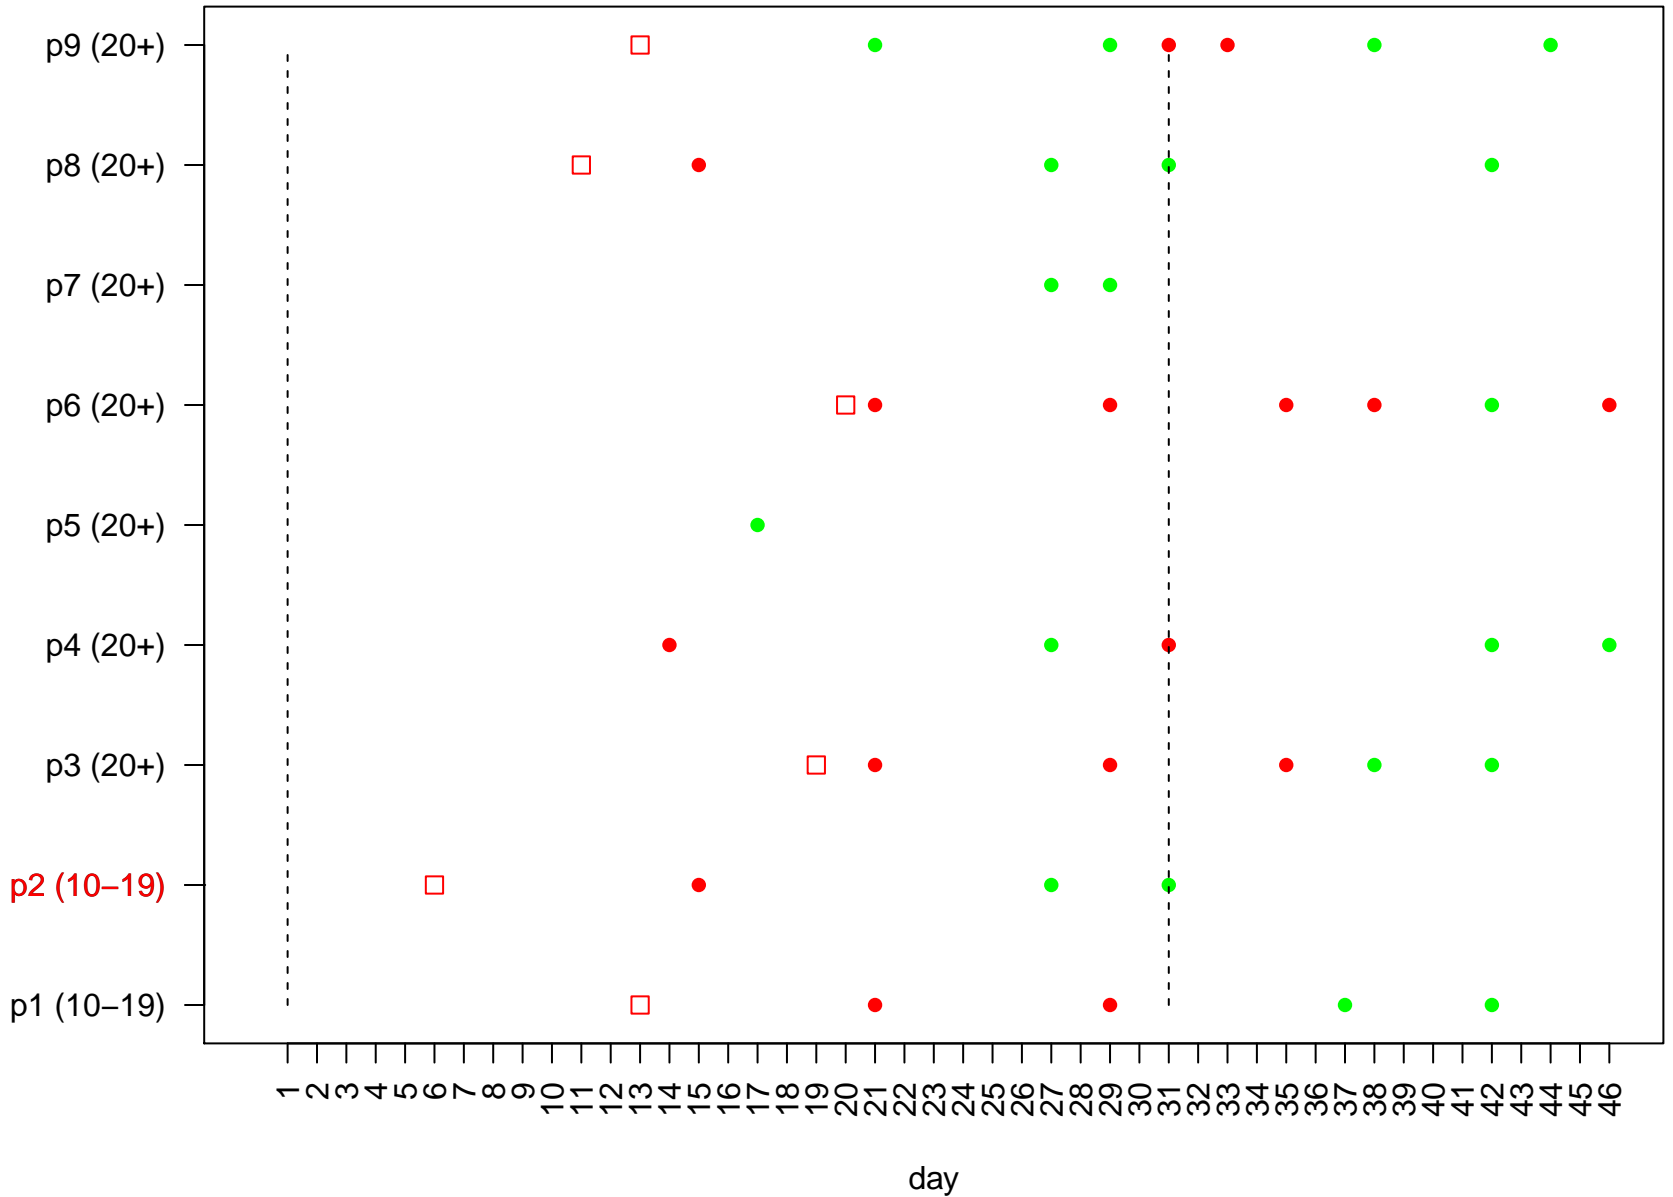

# Household 52

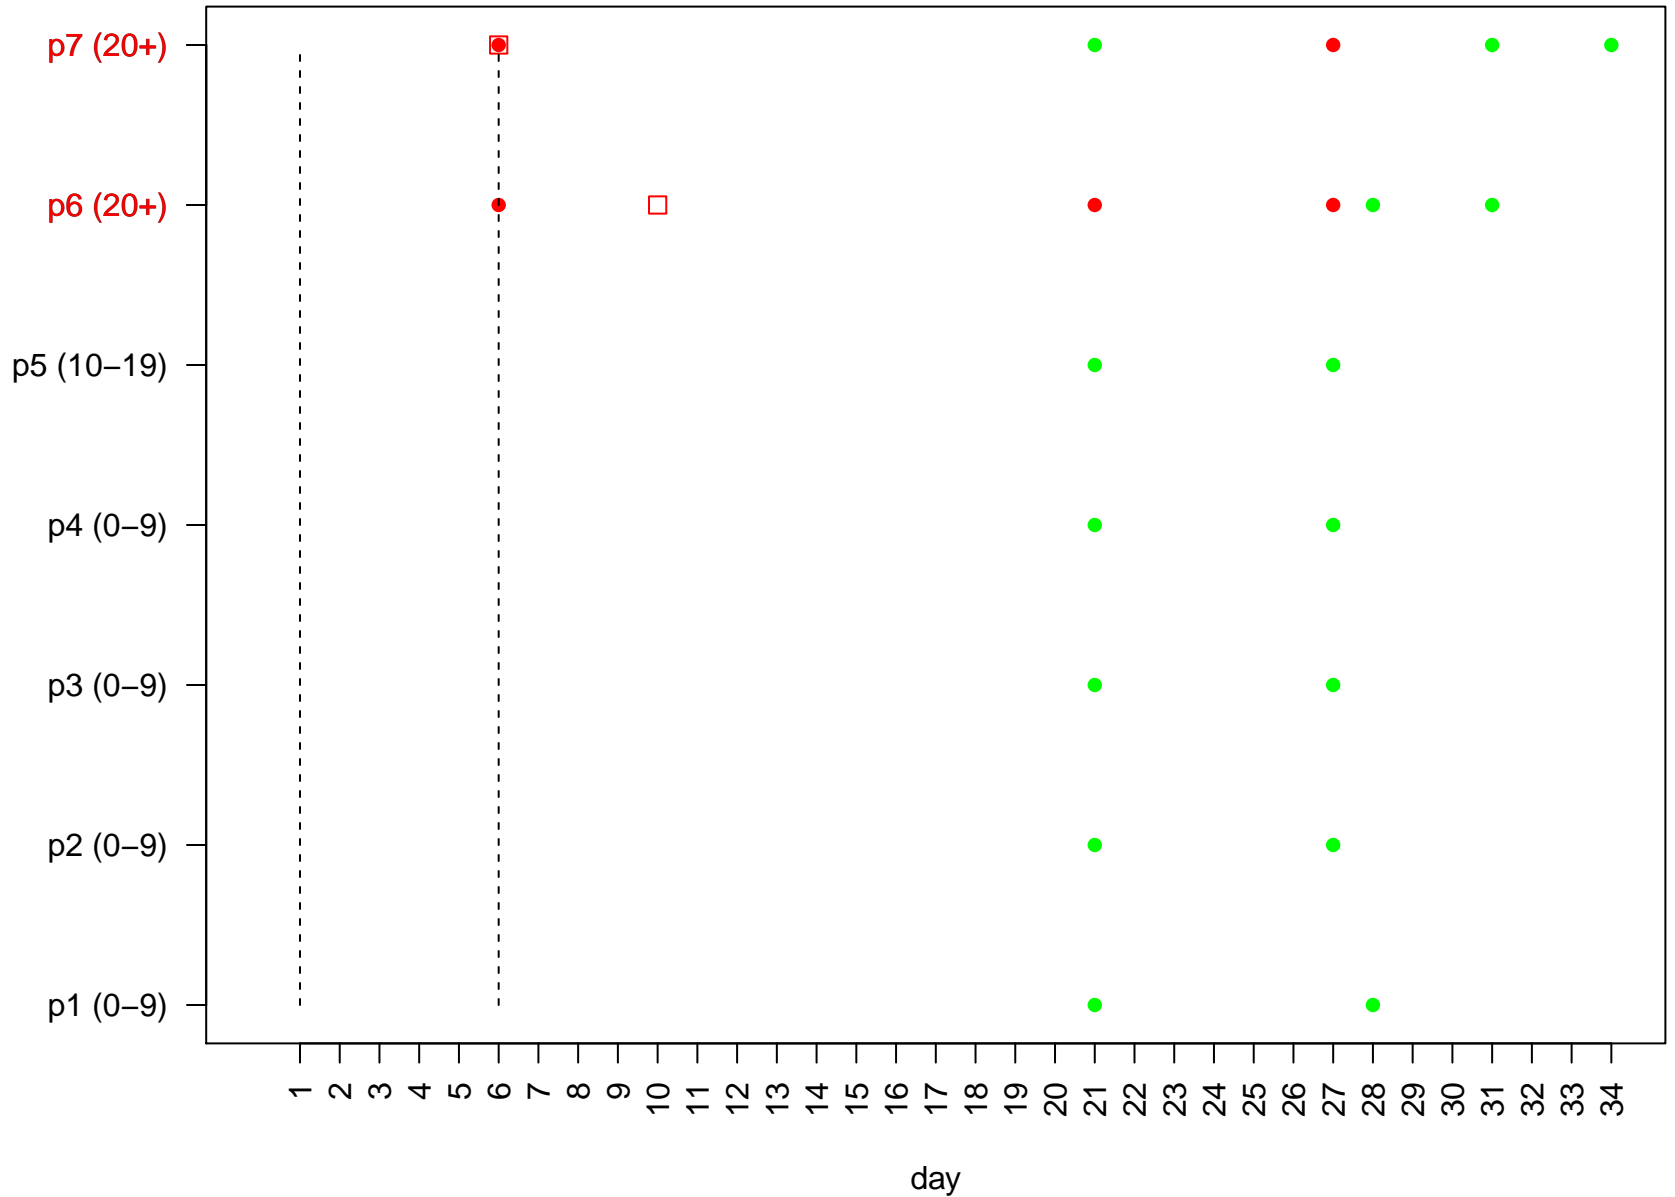

# Household 53

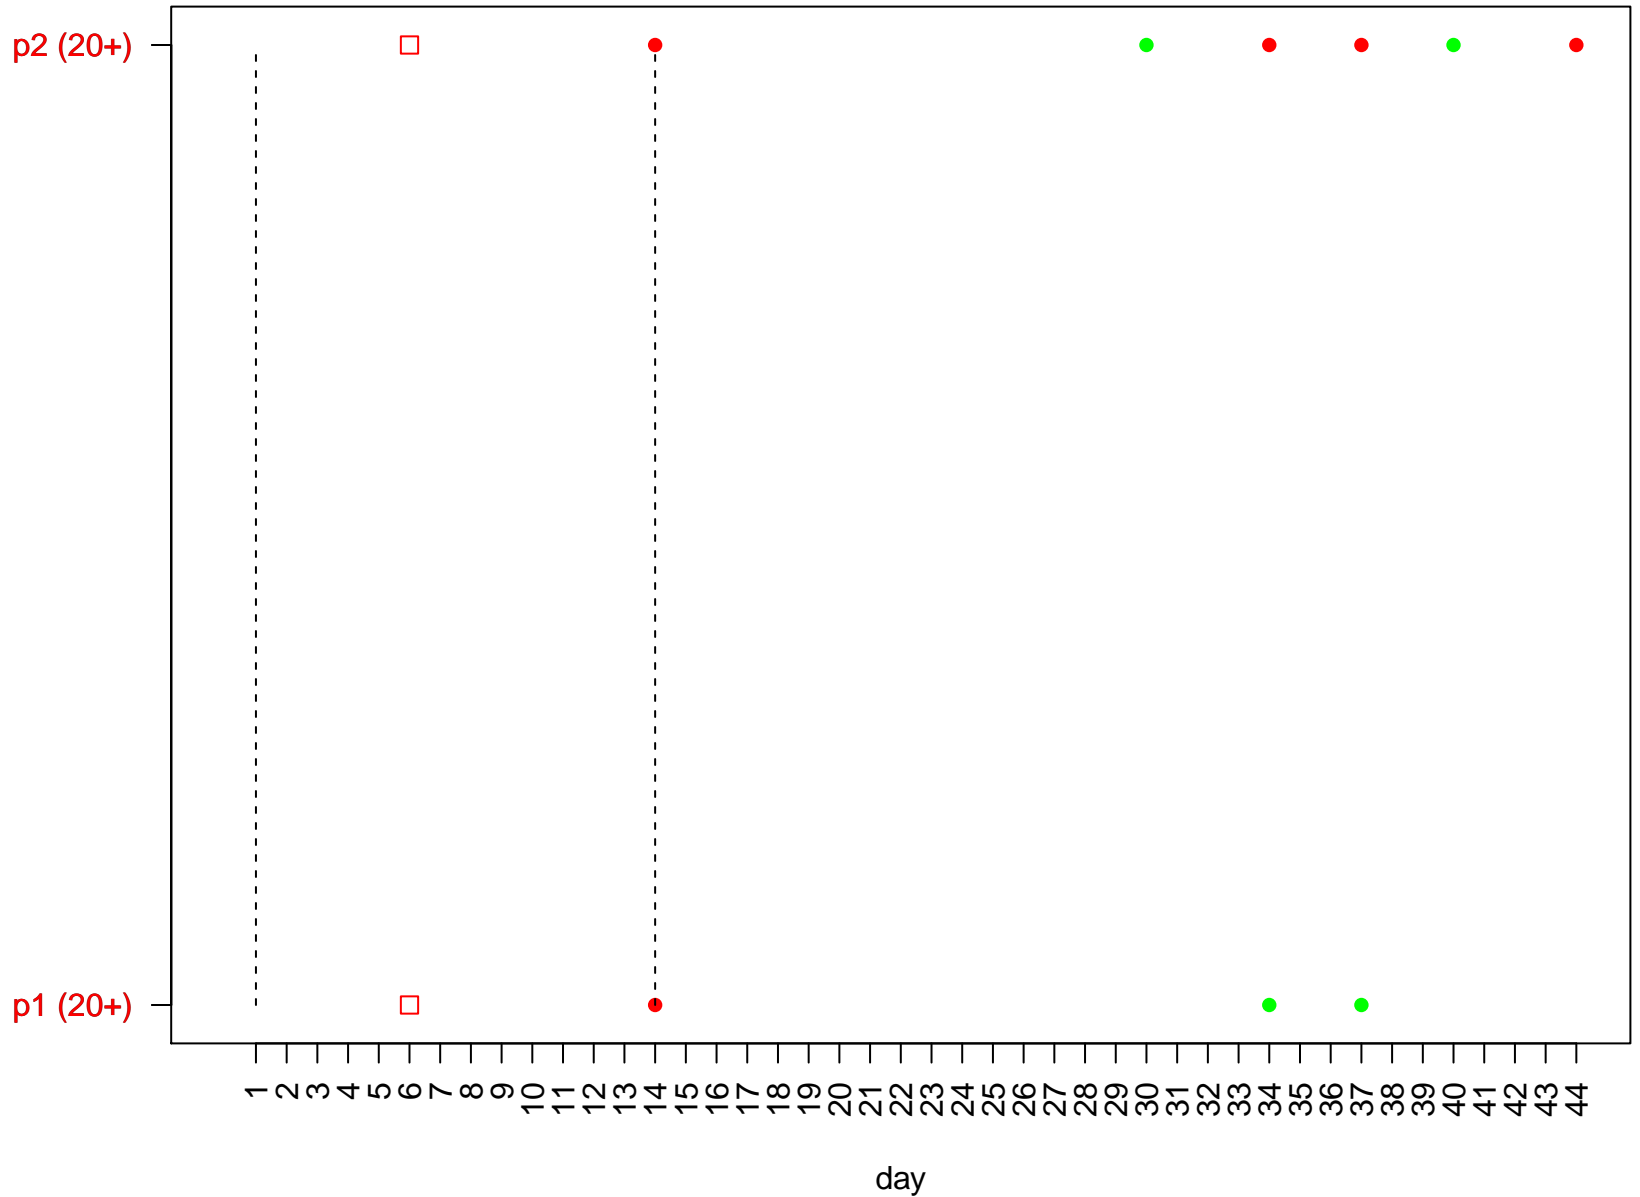

# Household 54

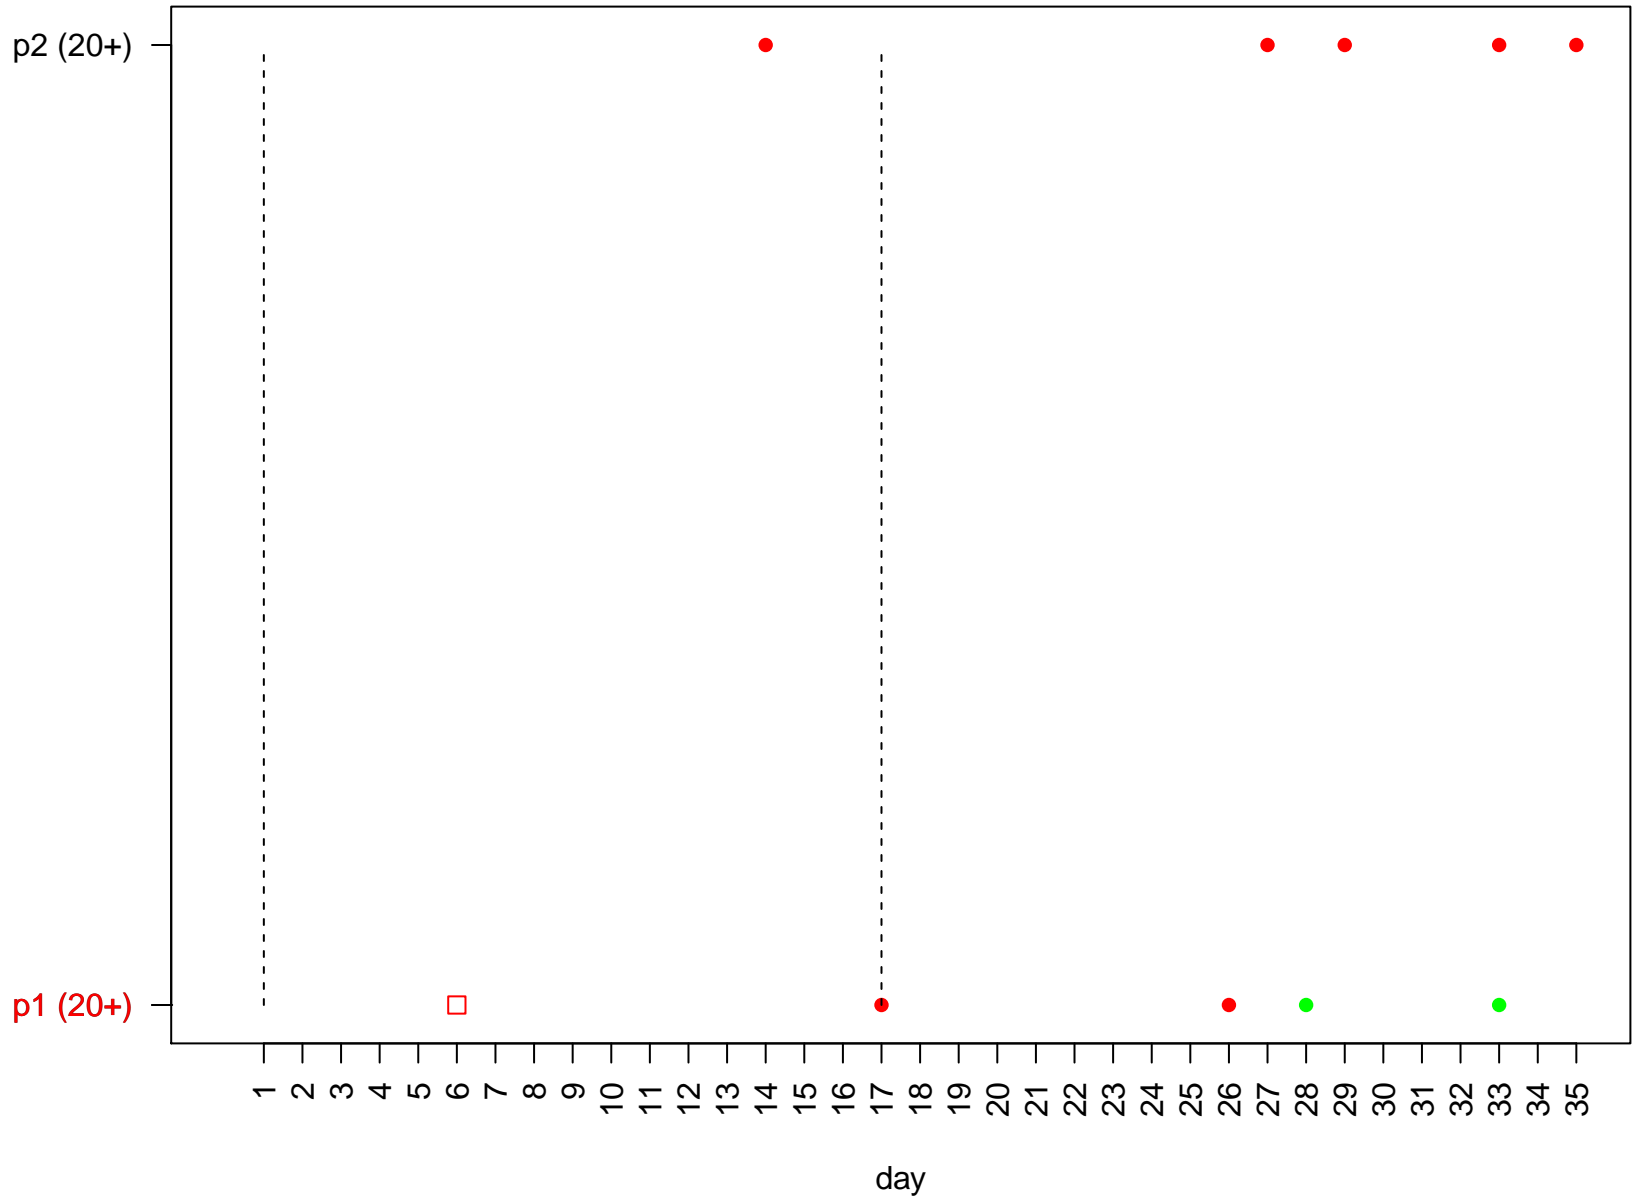

# Household 55

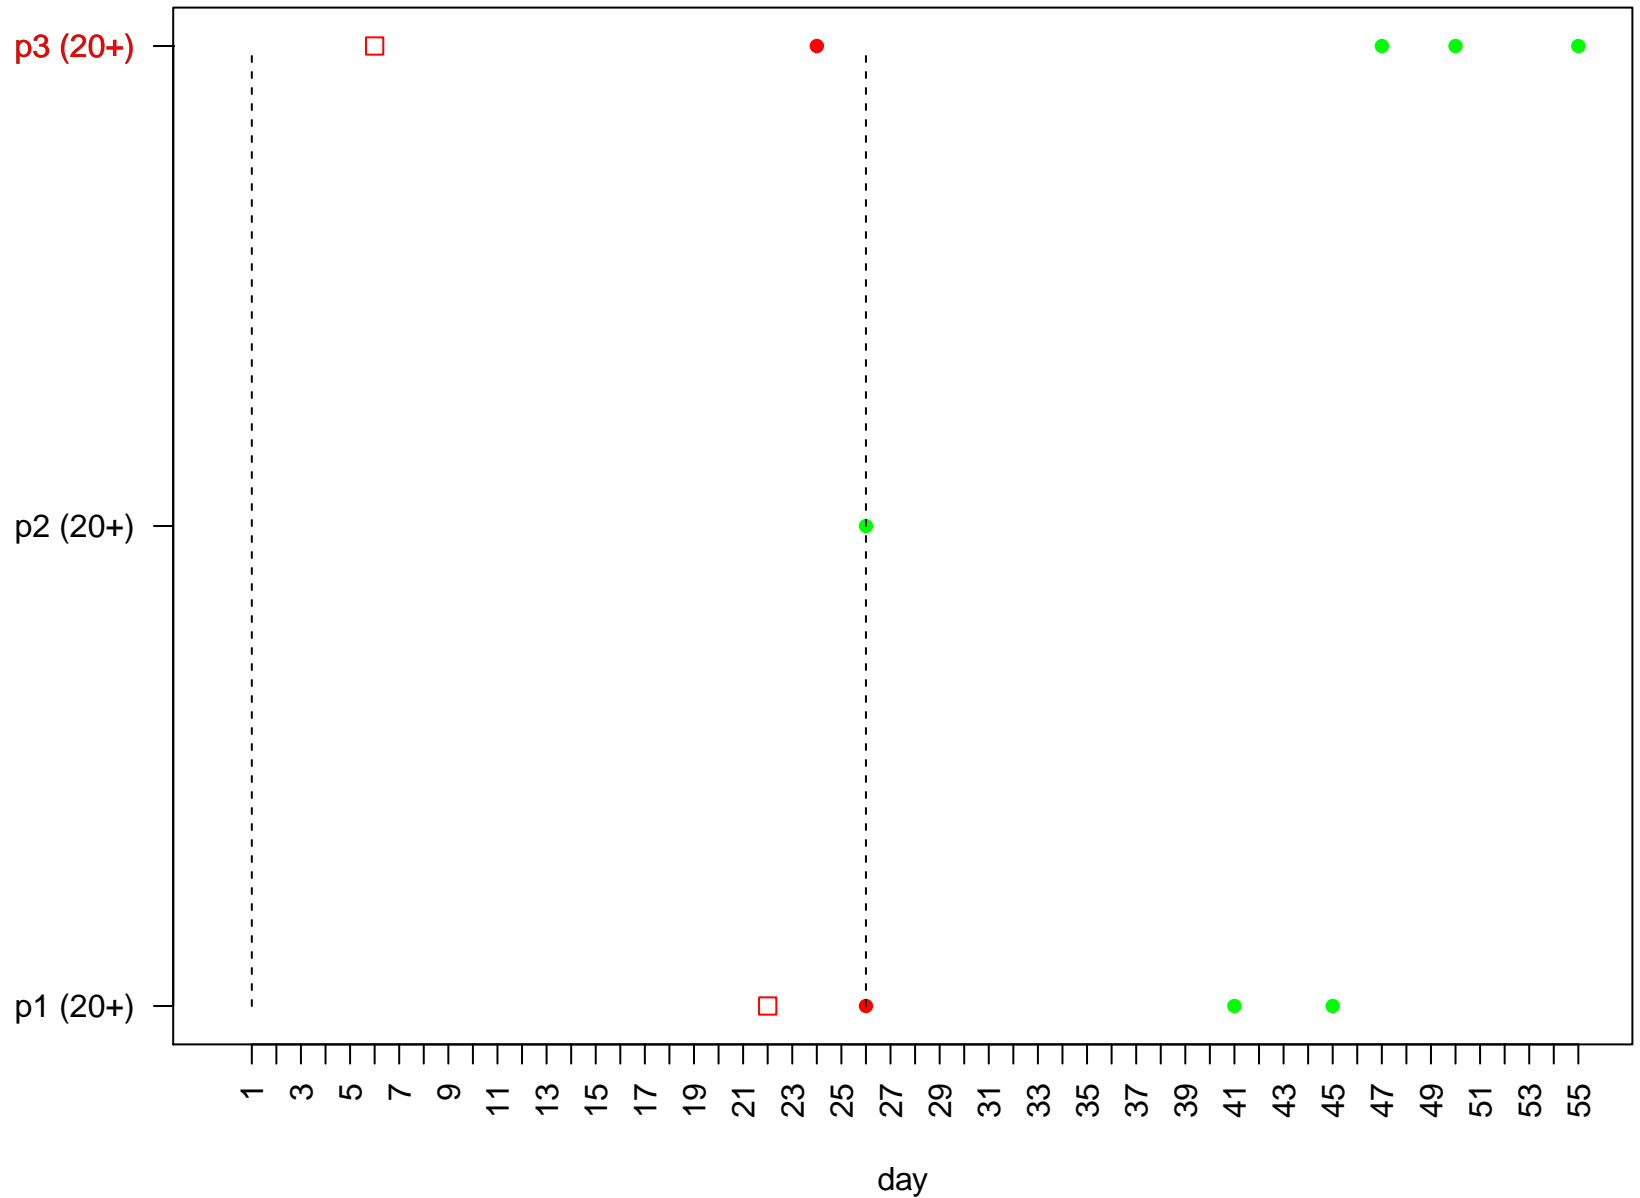



# Household 57

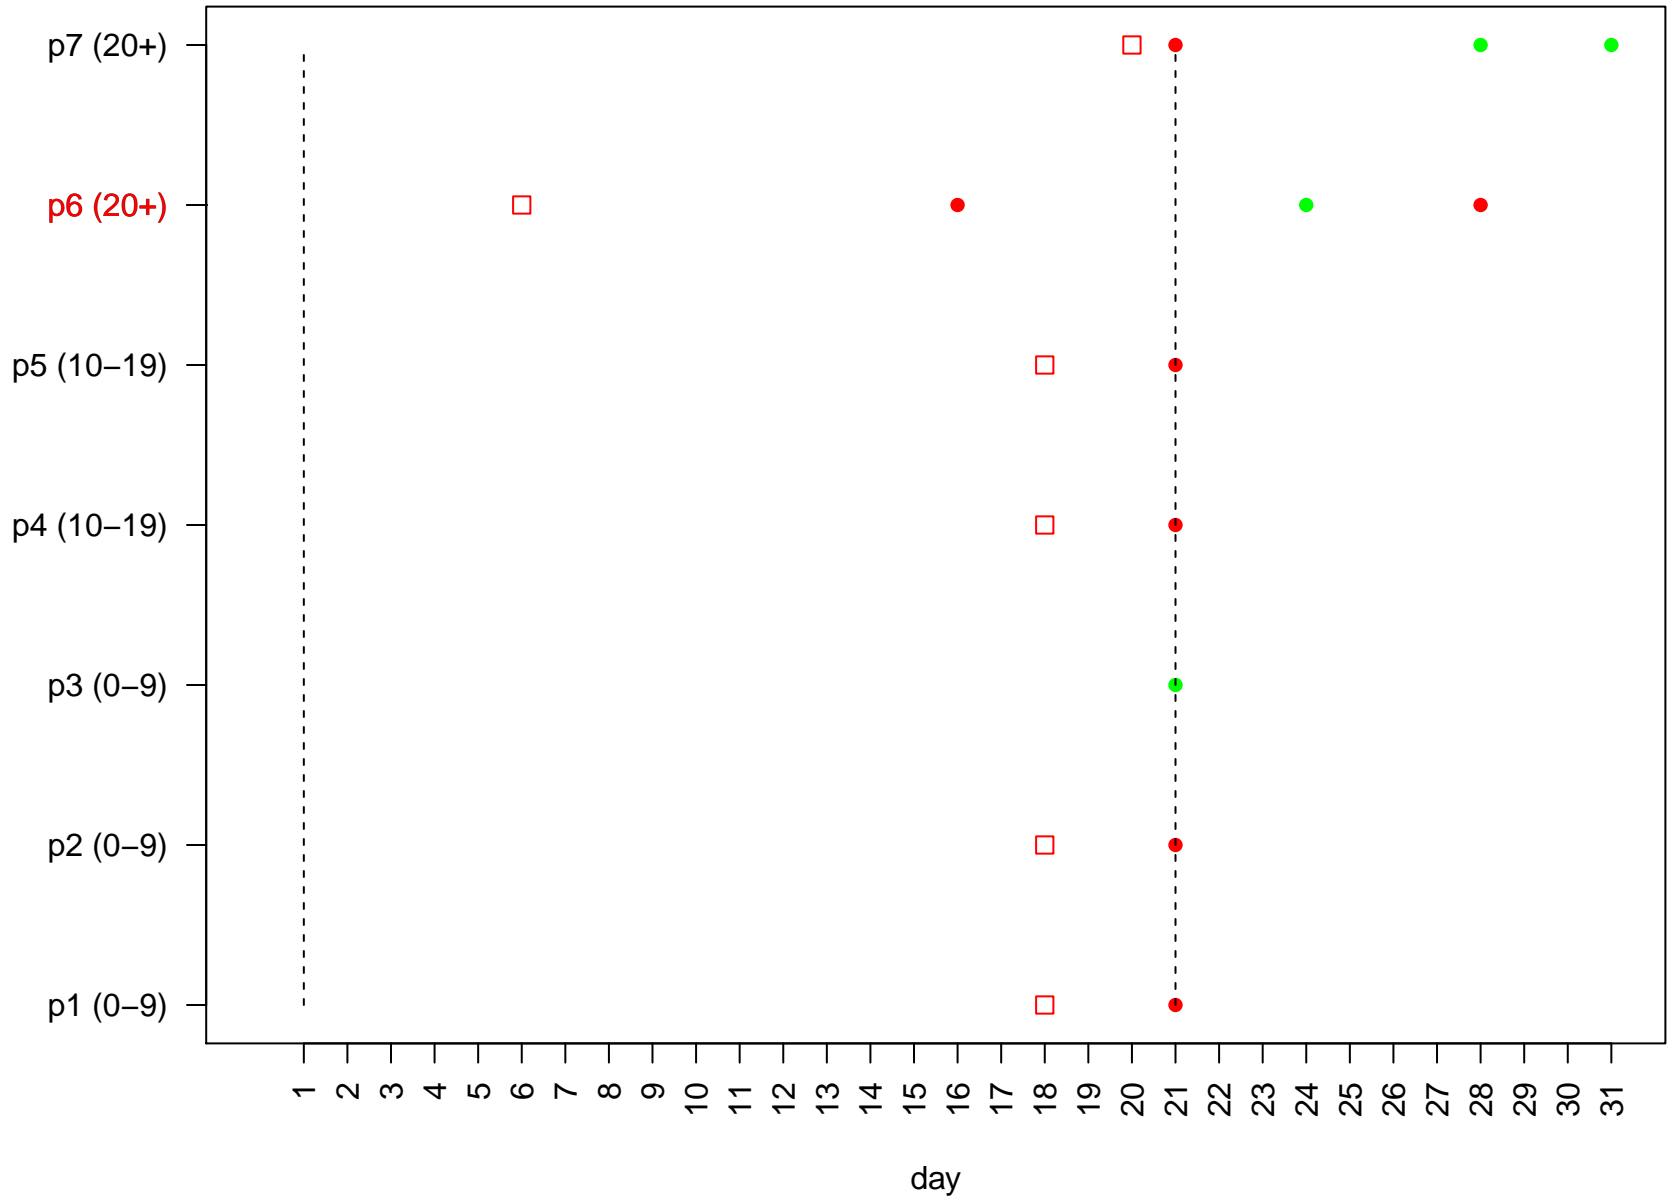

# Household 58

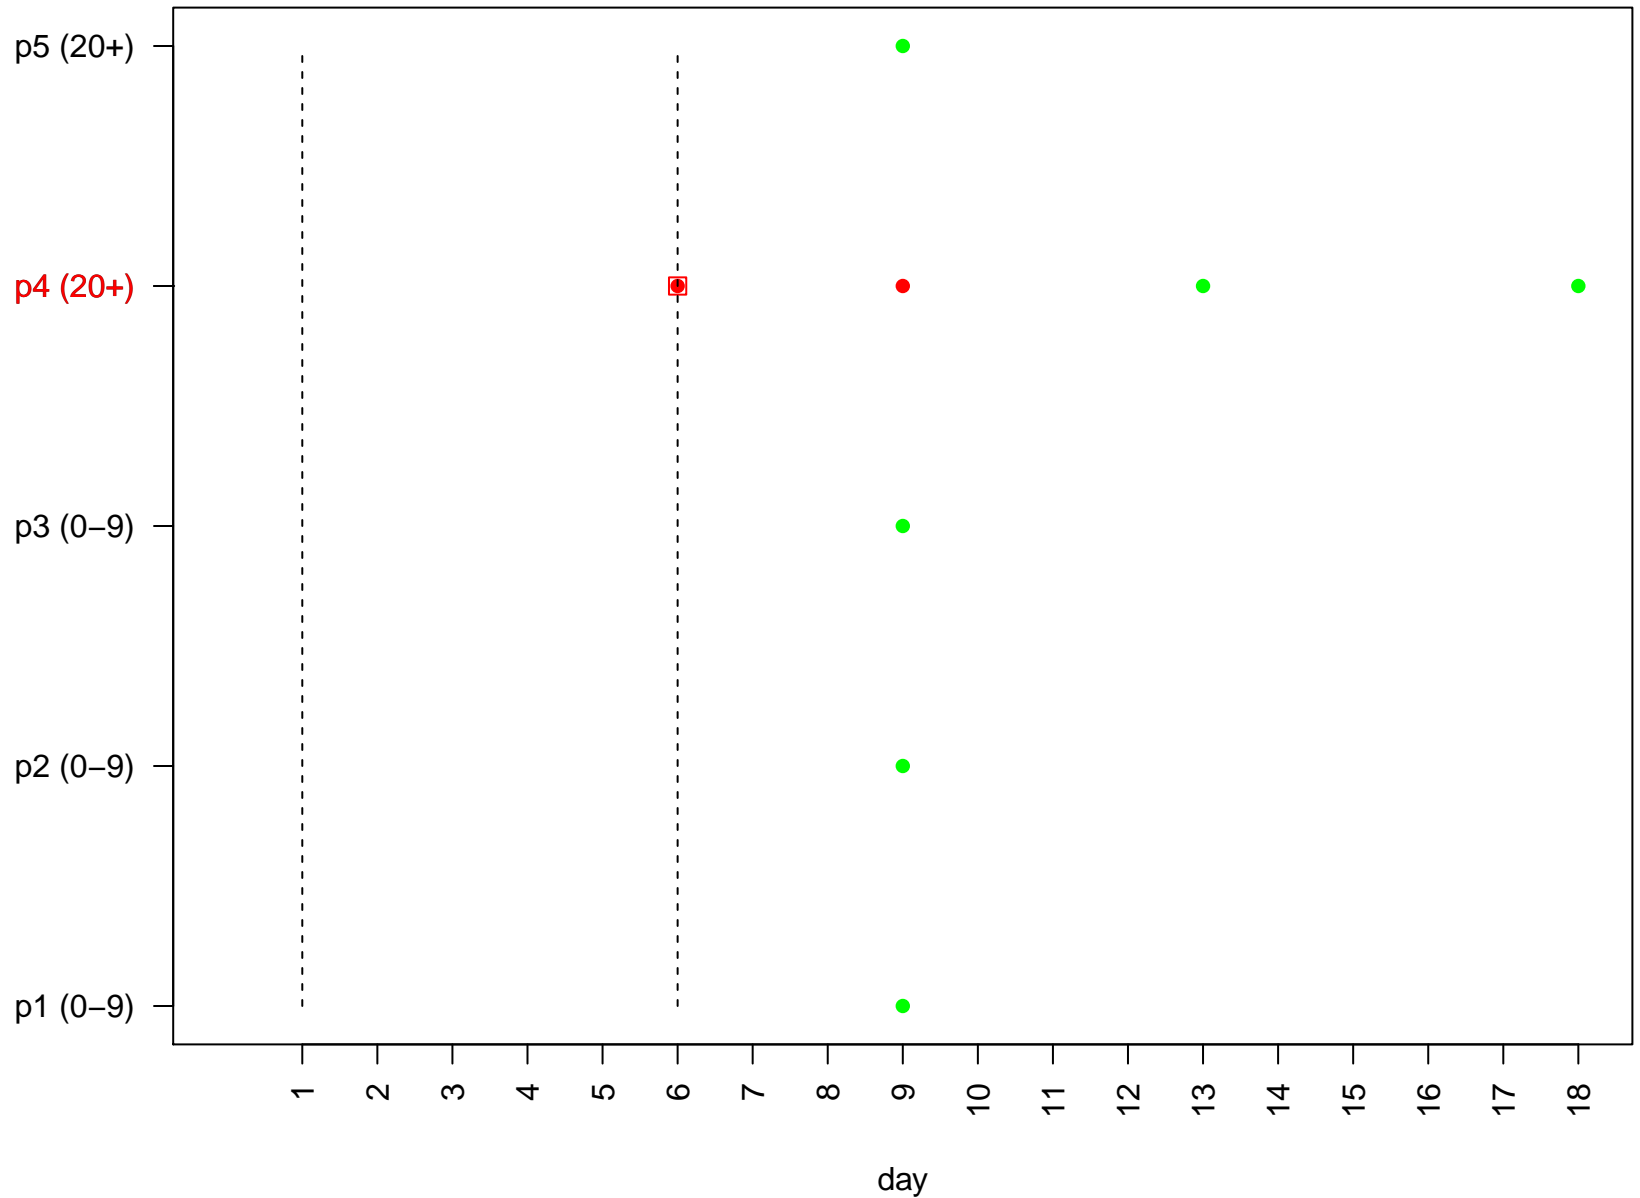



# Household 59

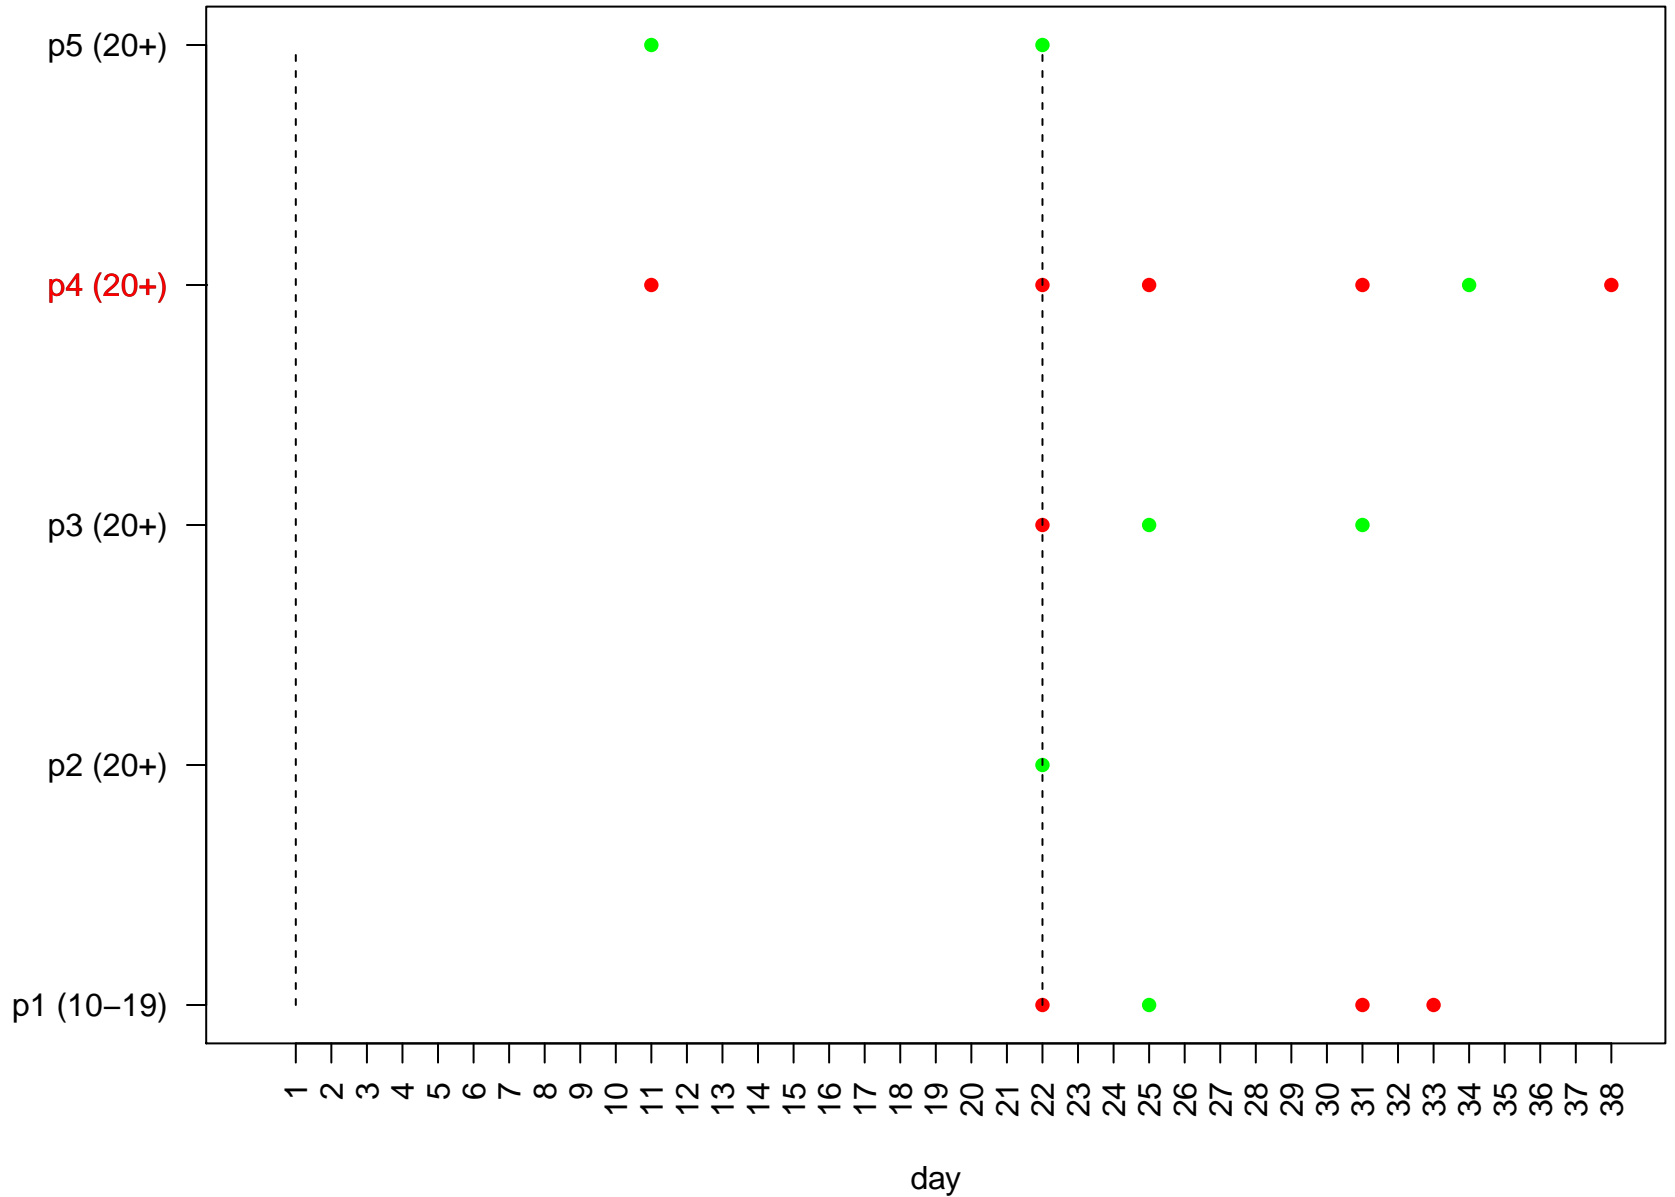

# Household 60

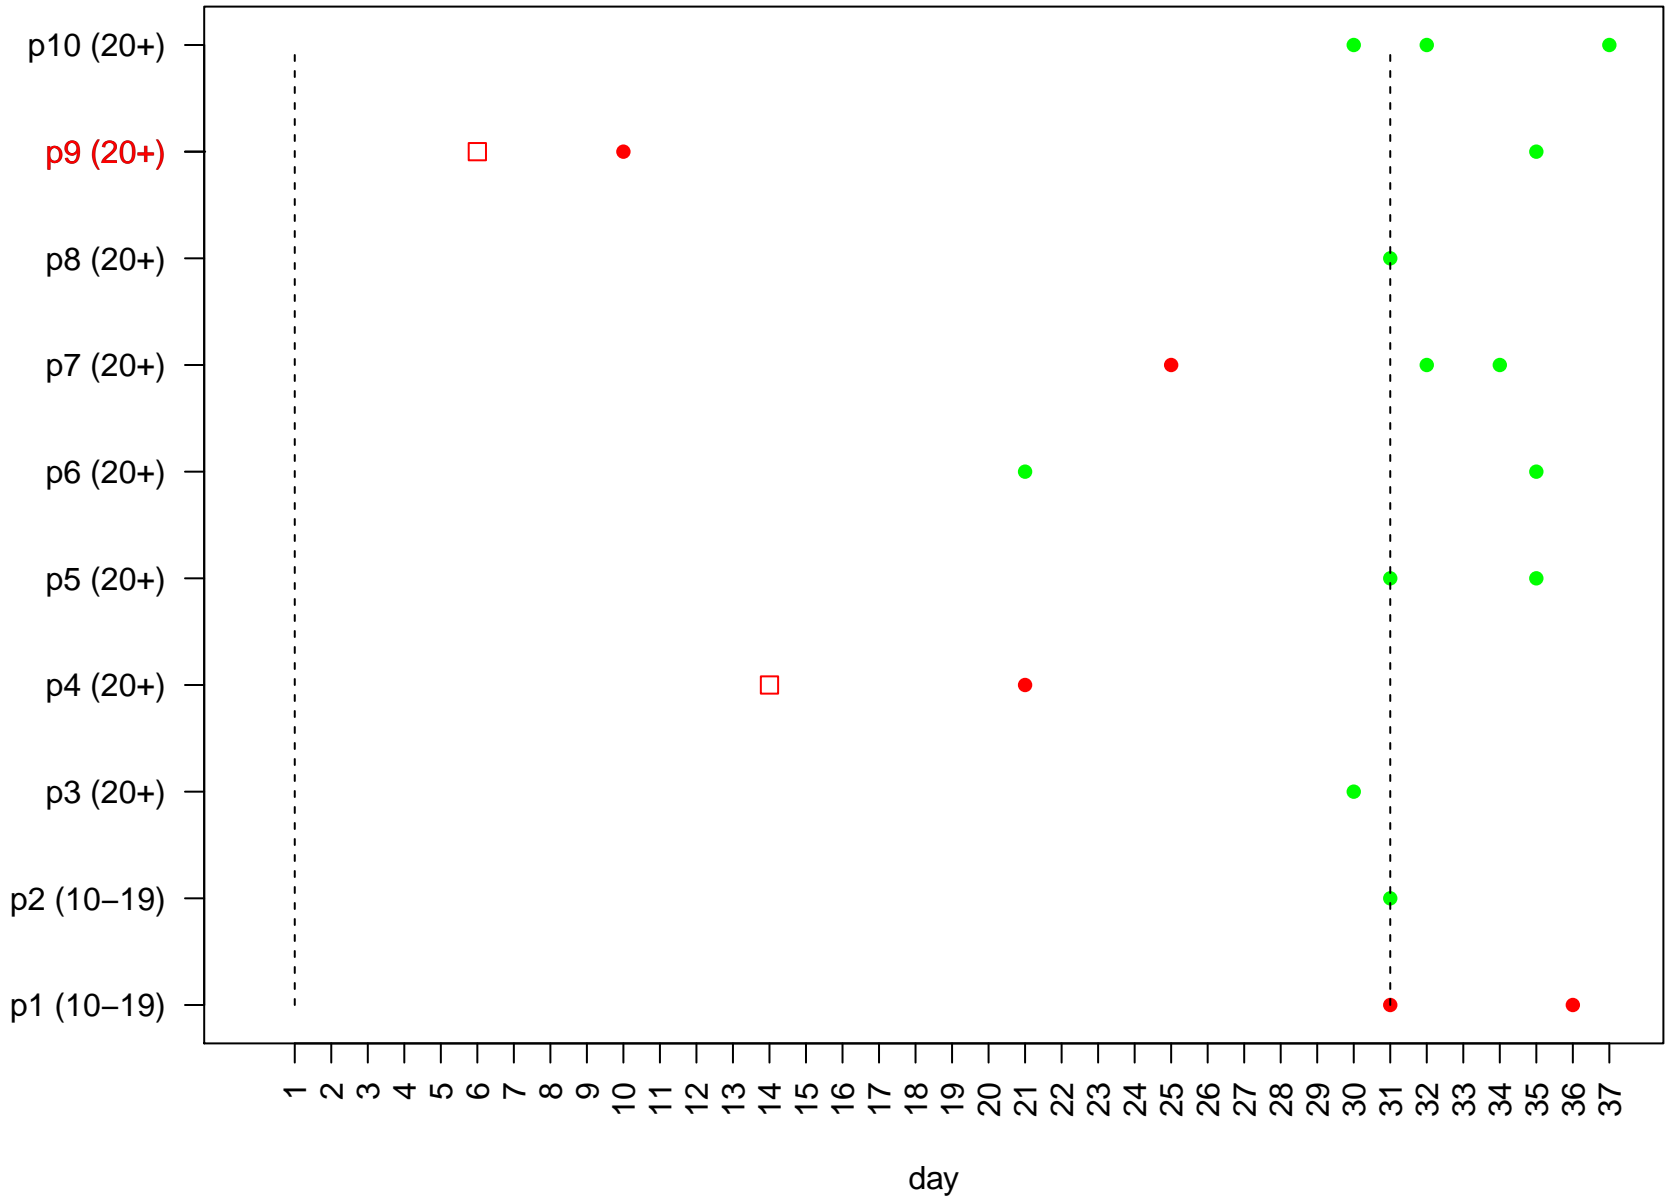

# Household 61

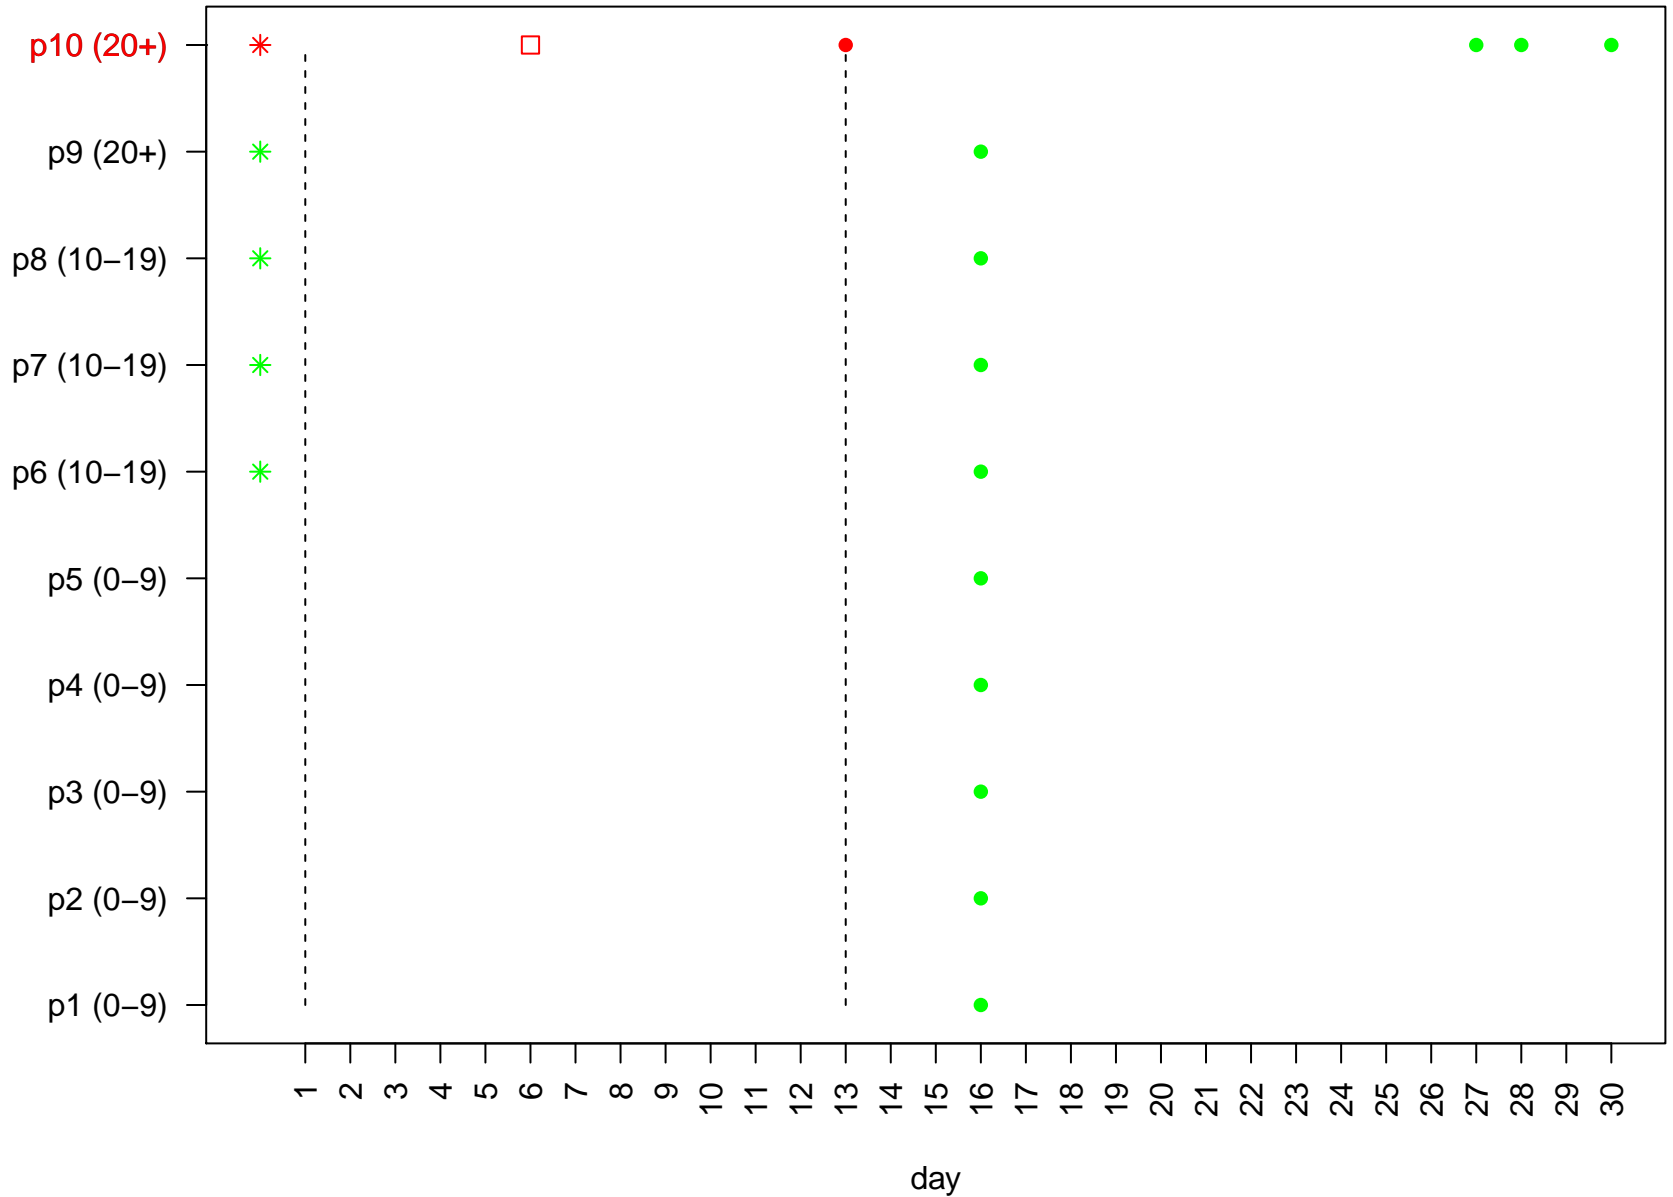

# Household 62

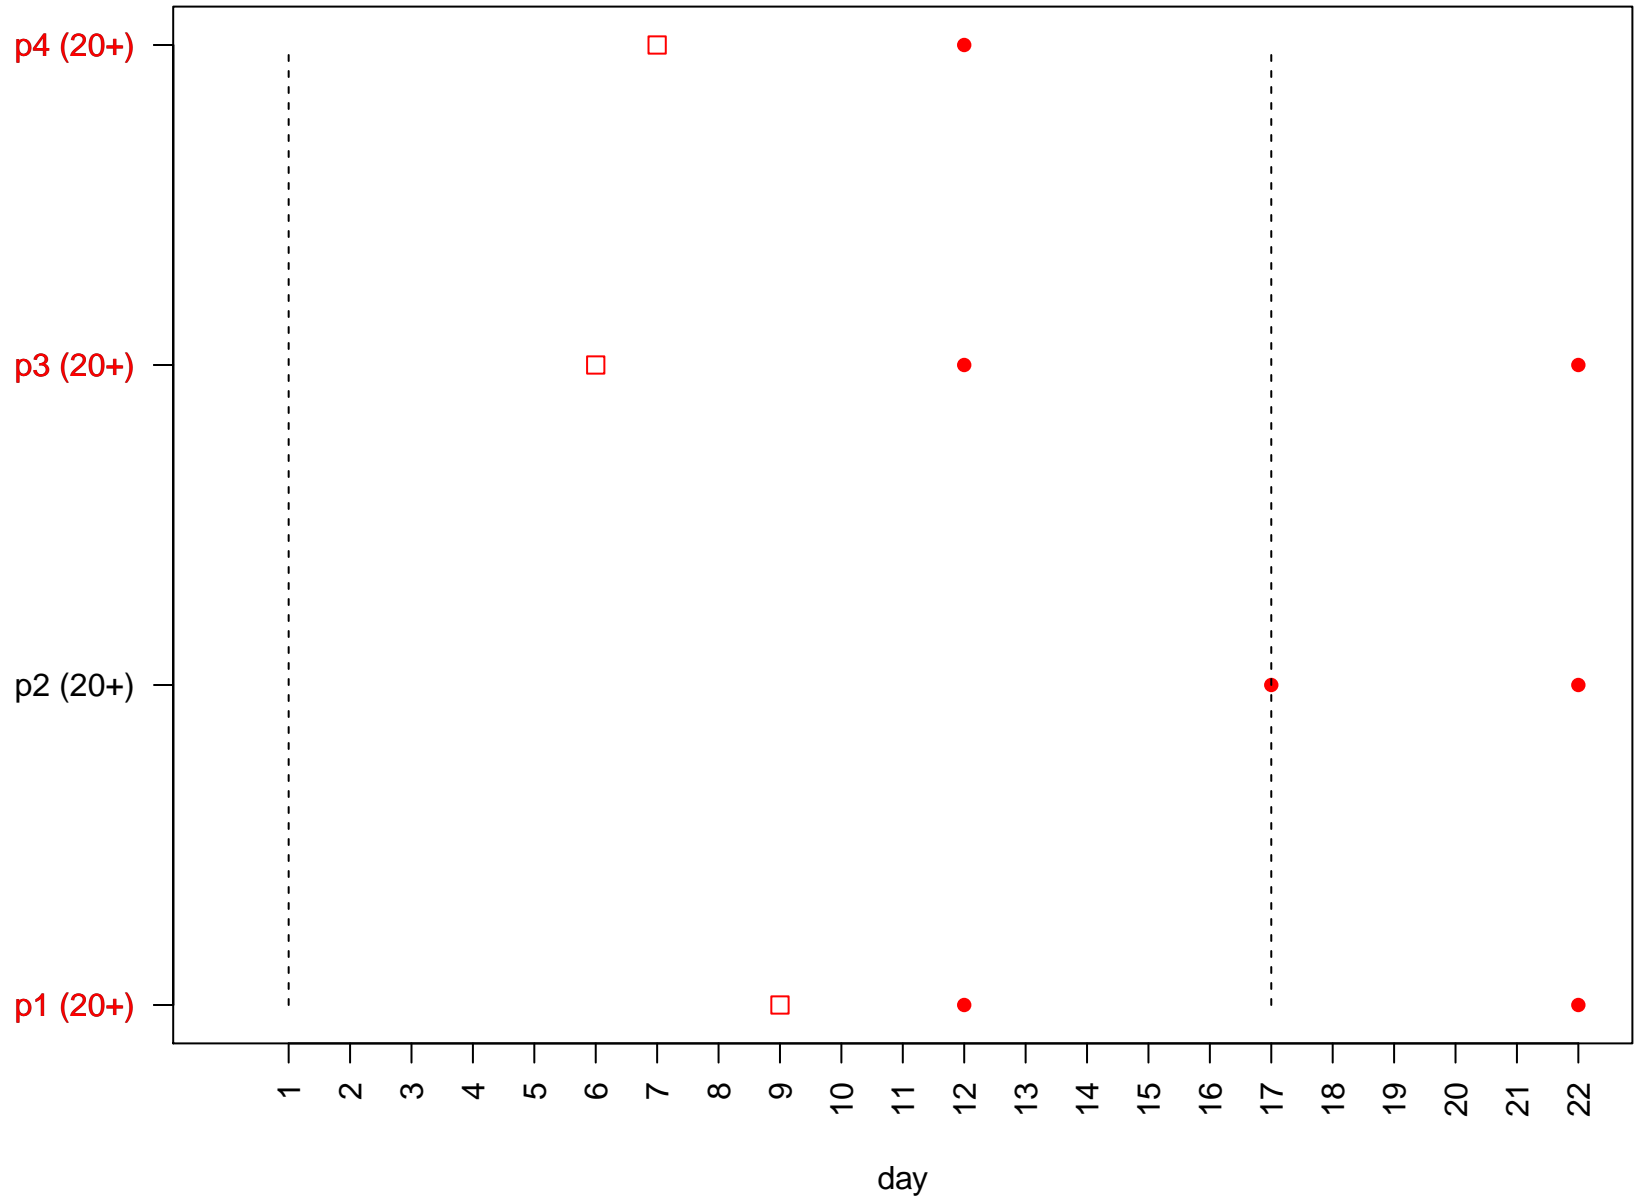

# Household 63

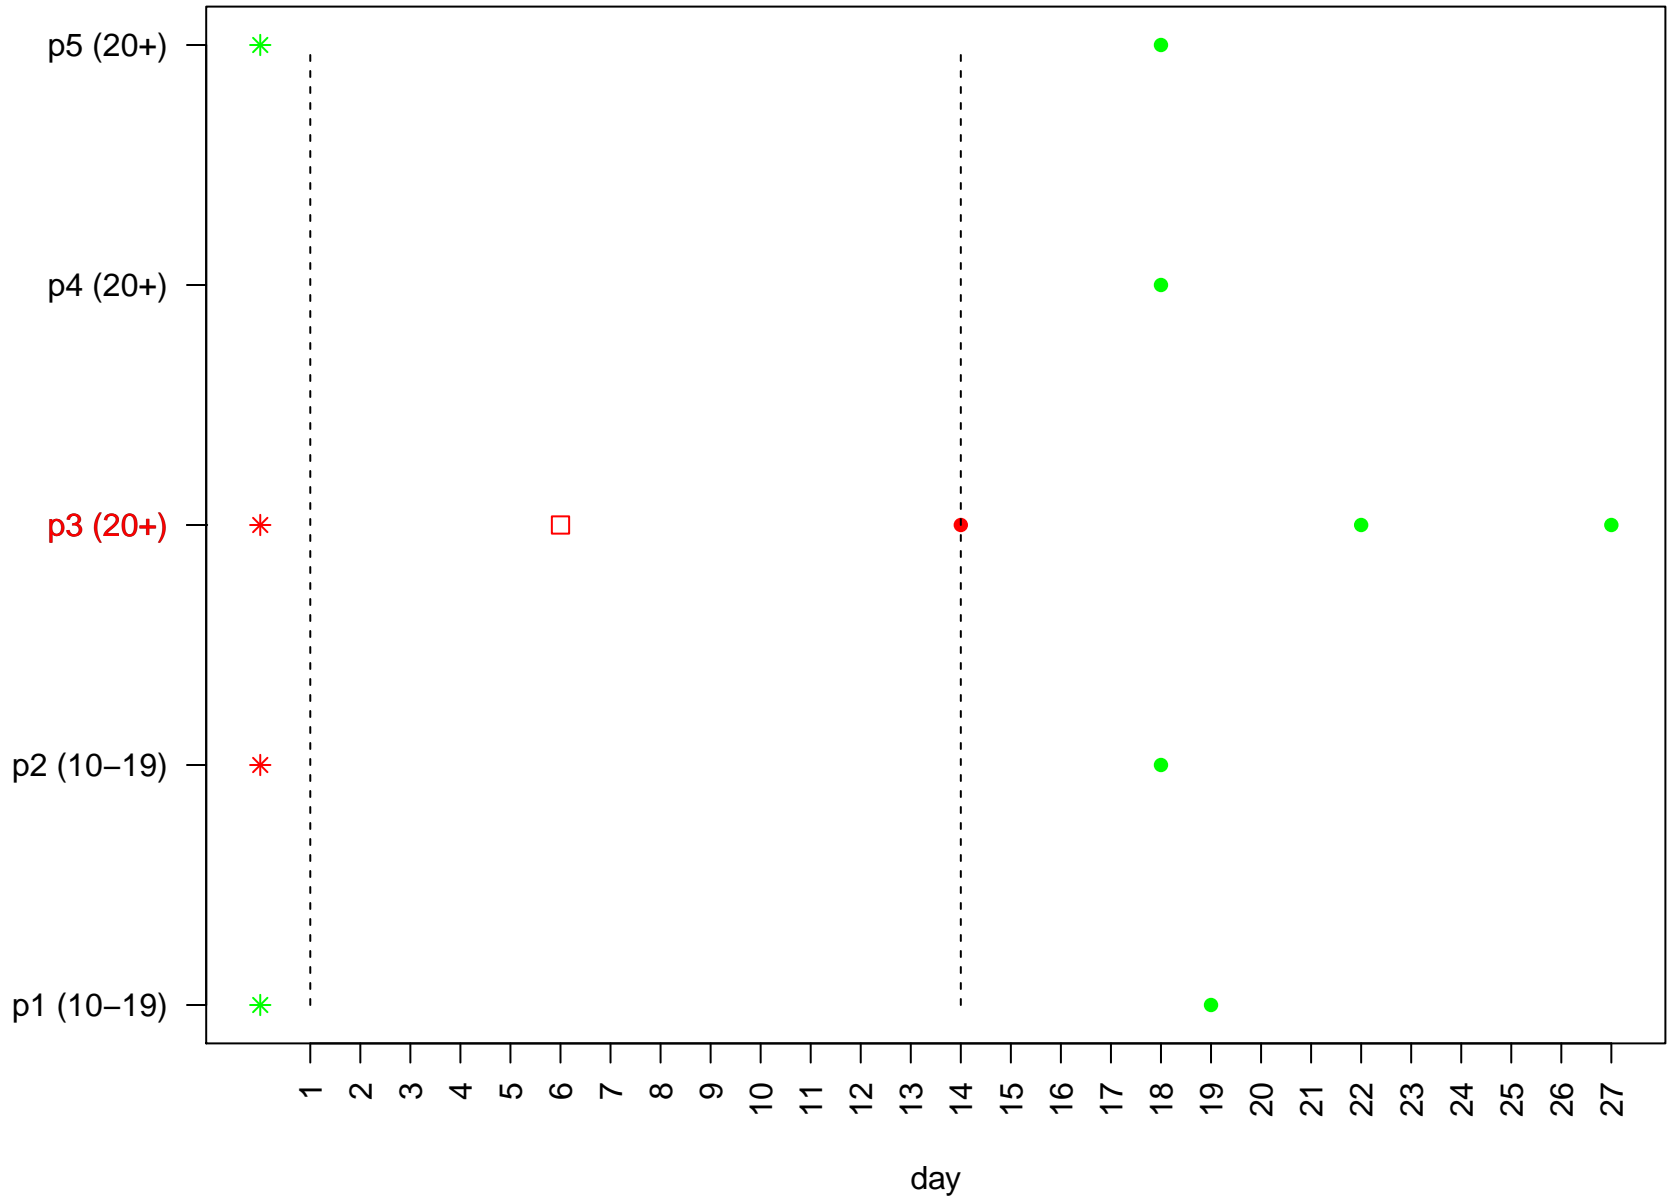

# Household 64

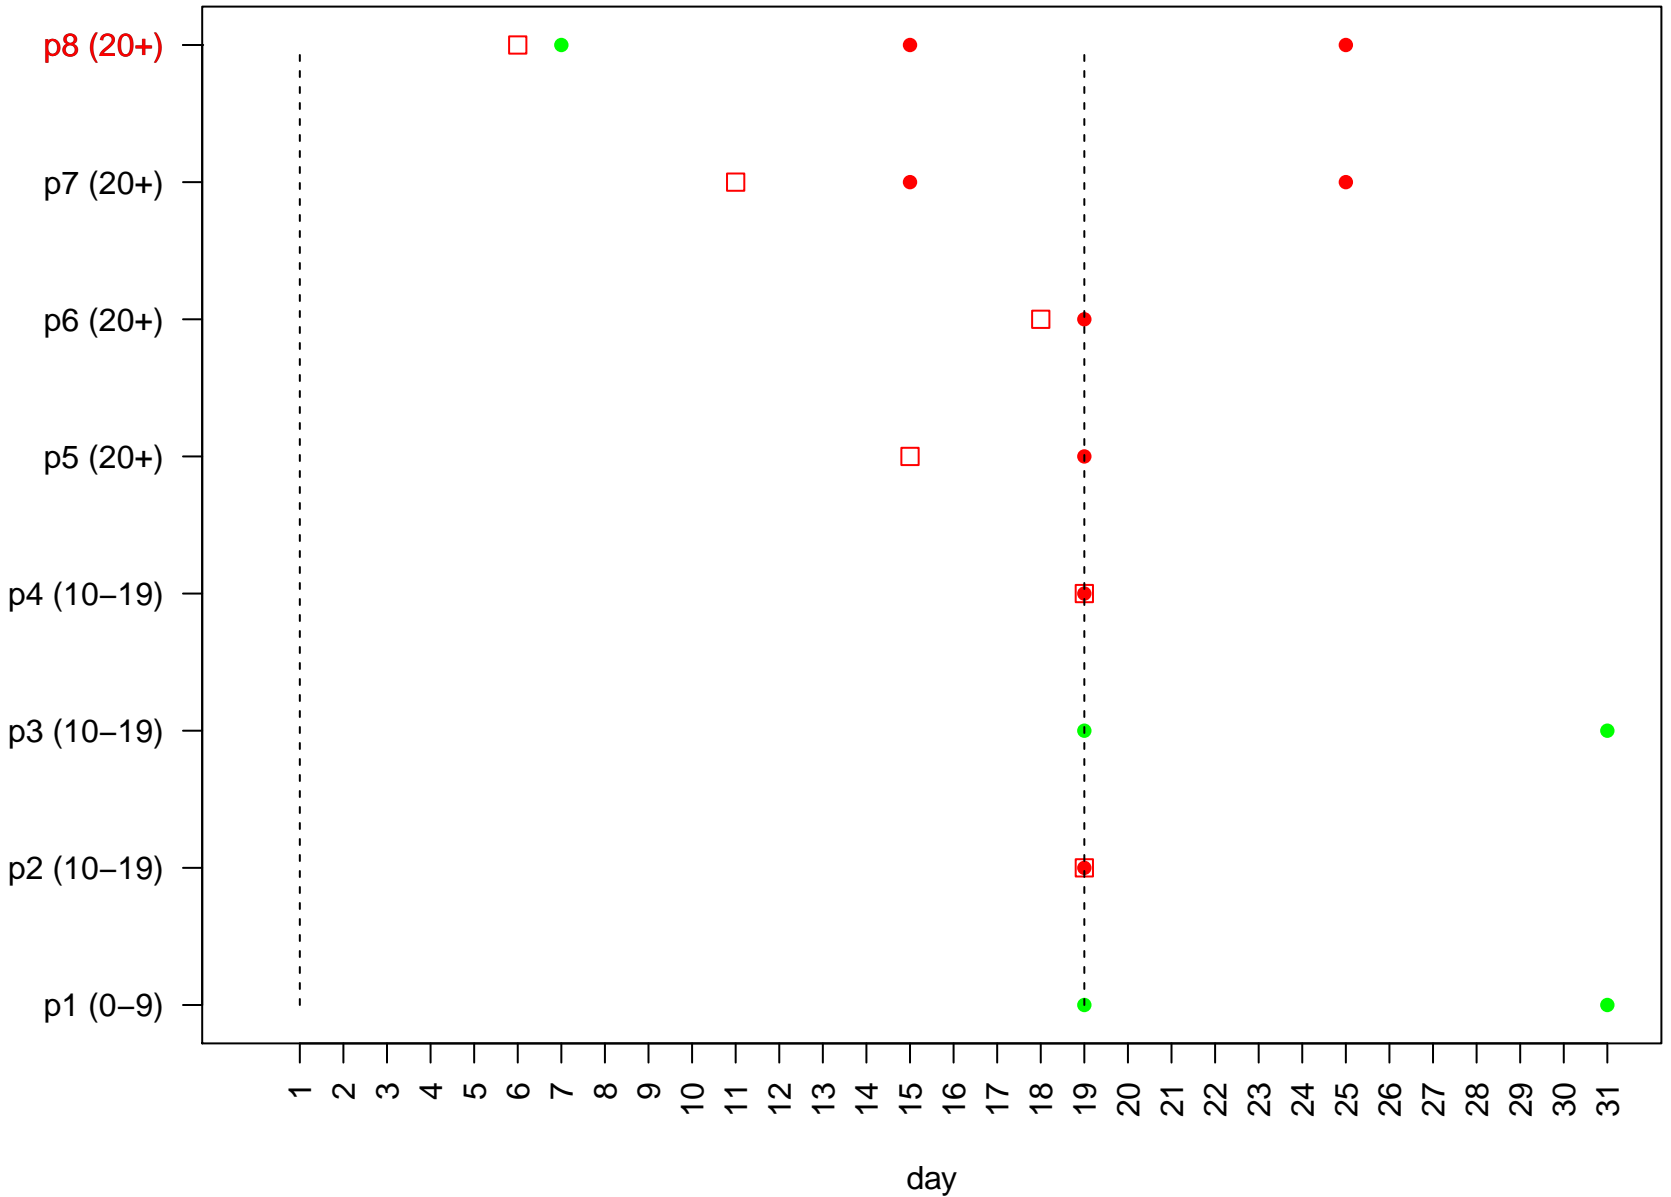

# Household 65

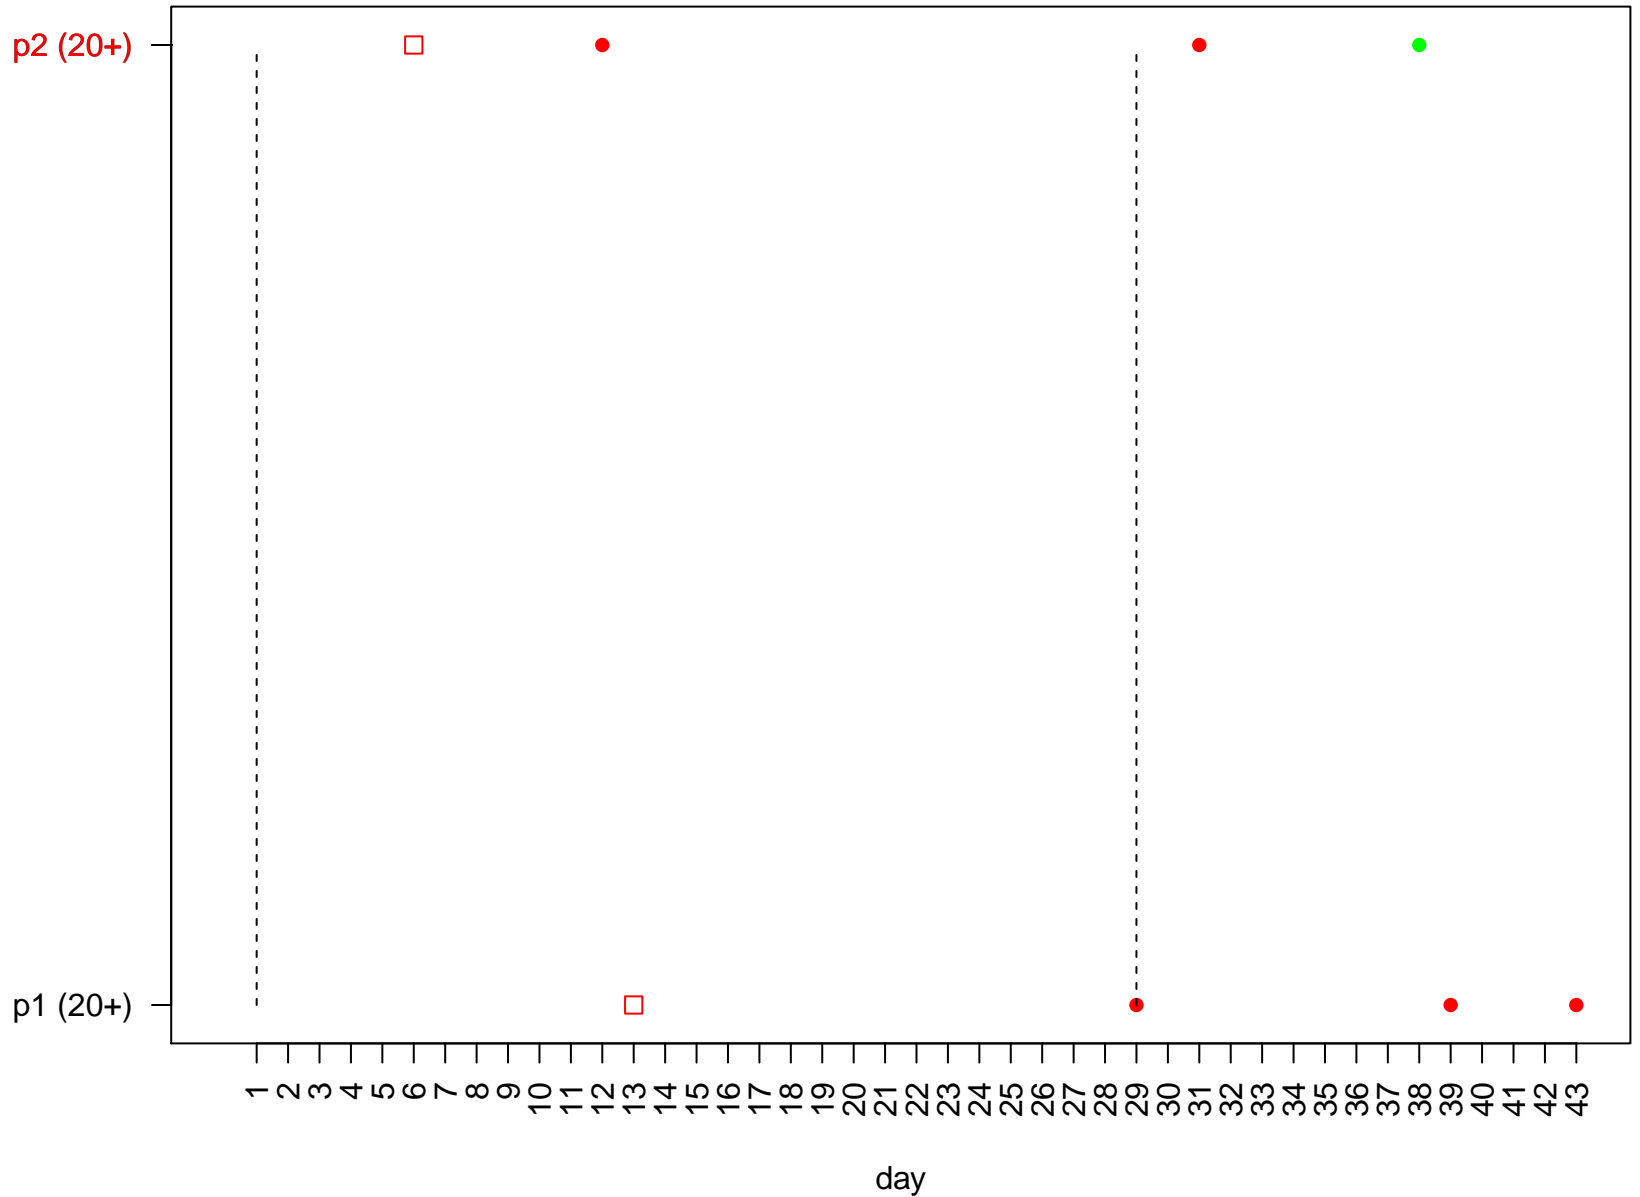





# Household 67

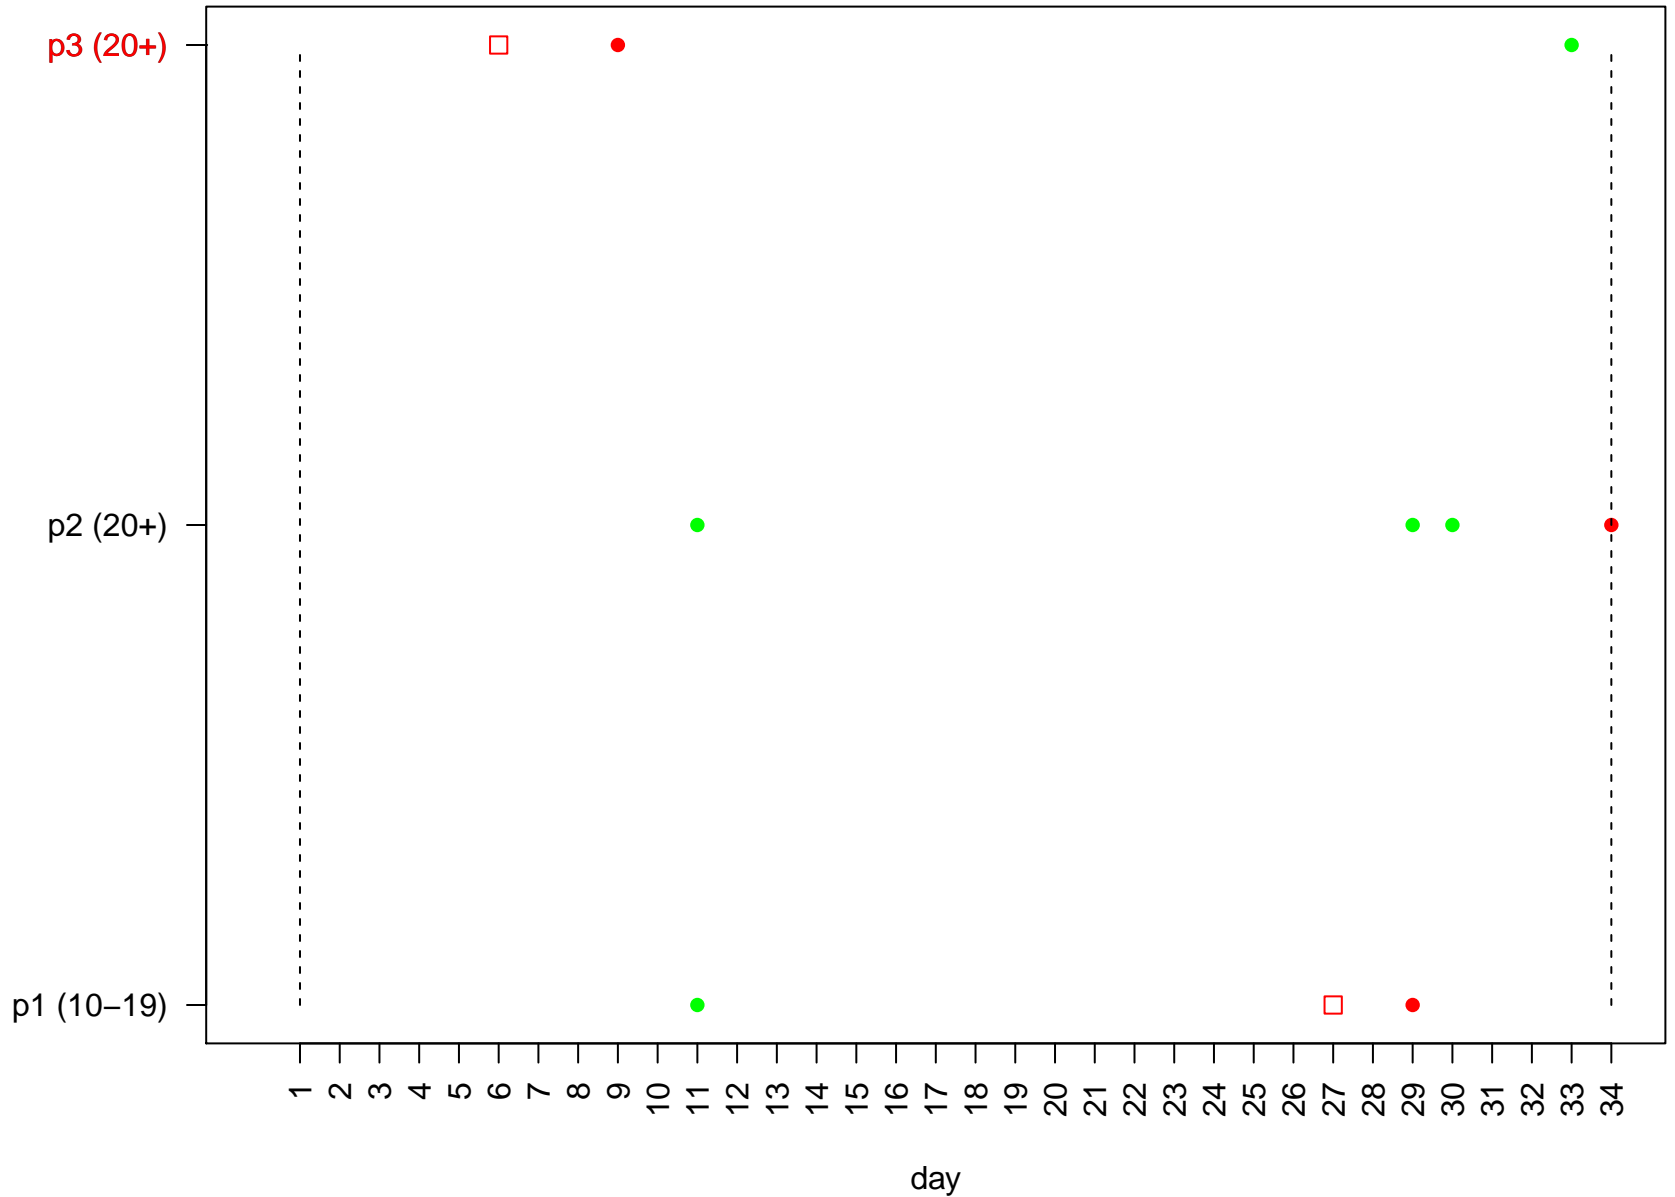

# Household 68

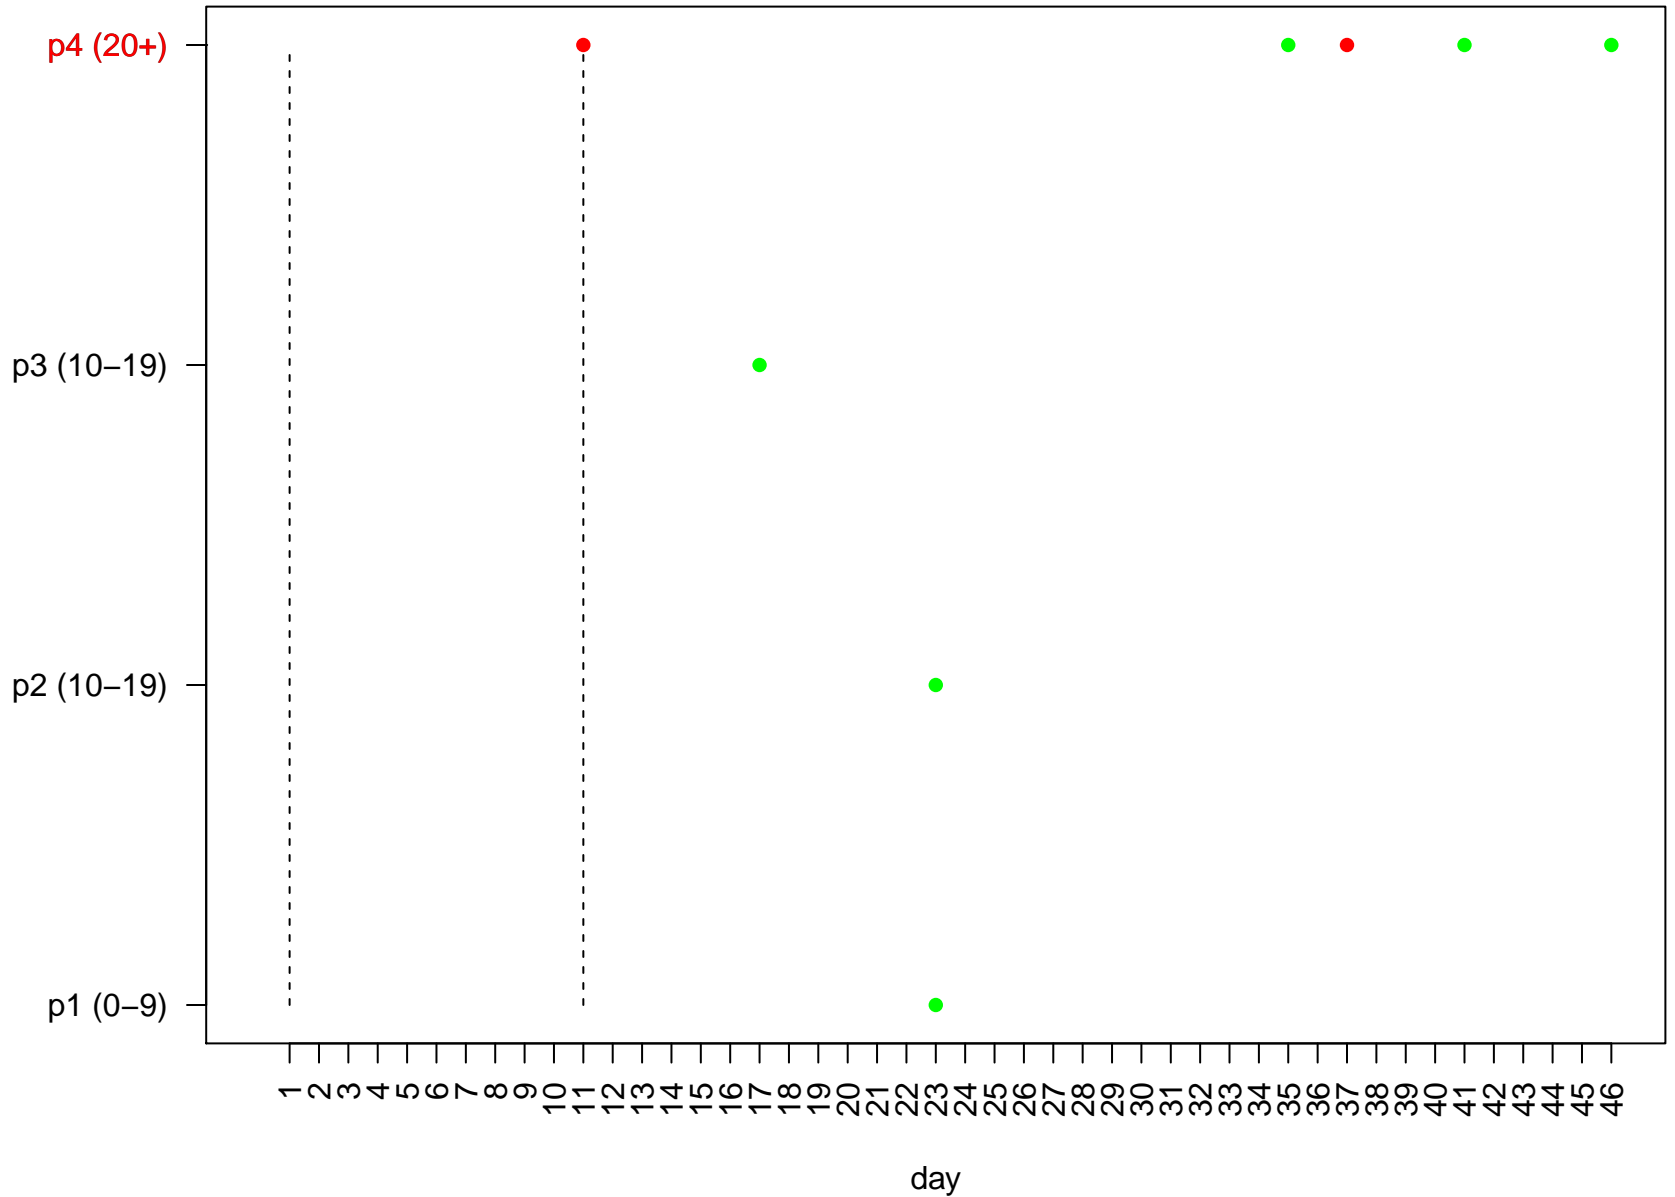

# Household 69

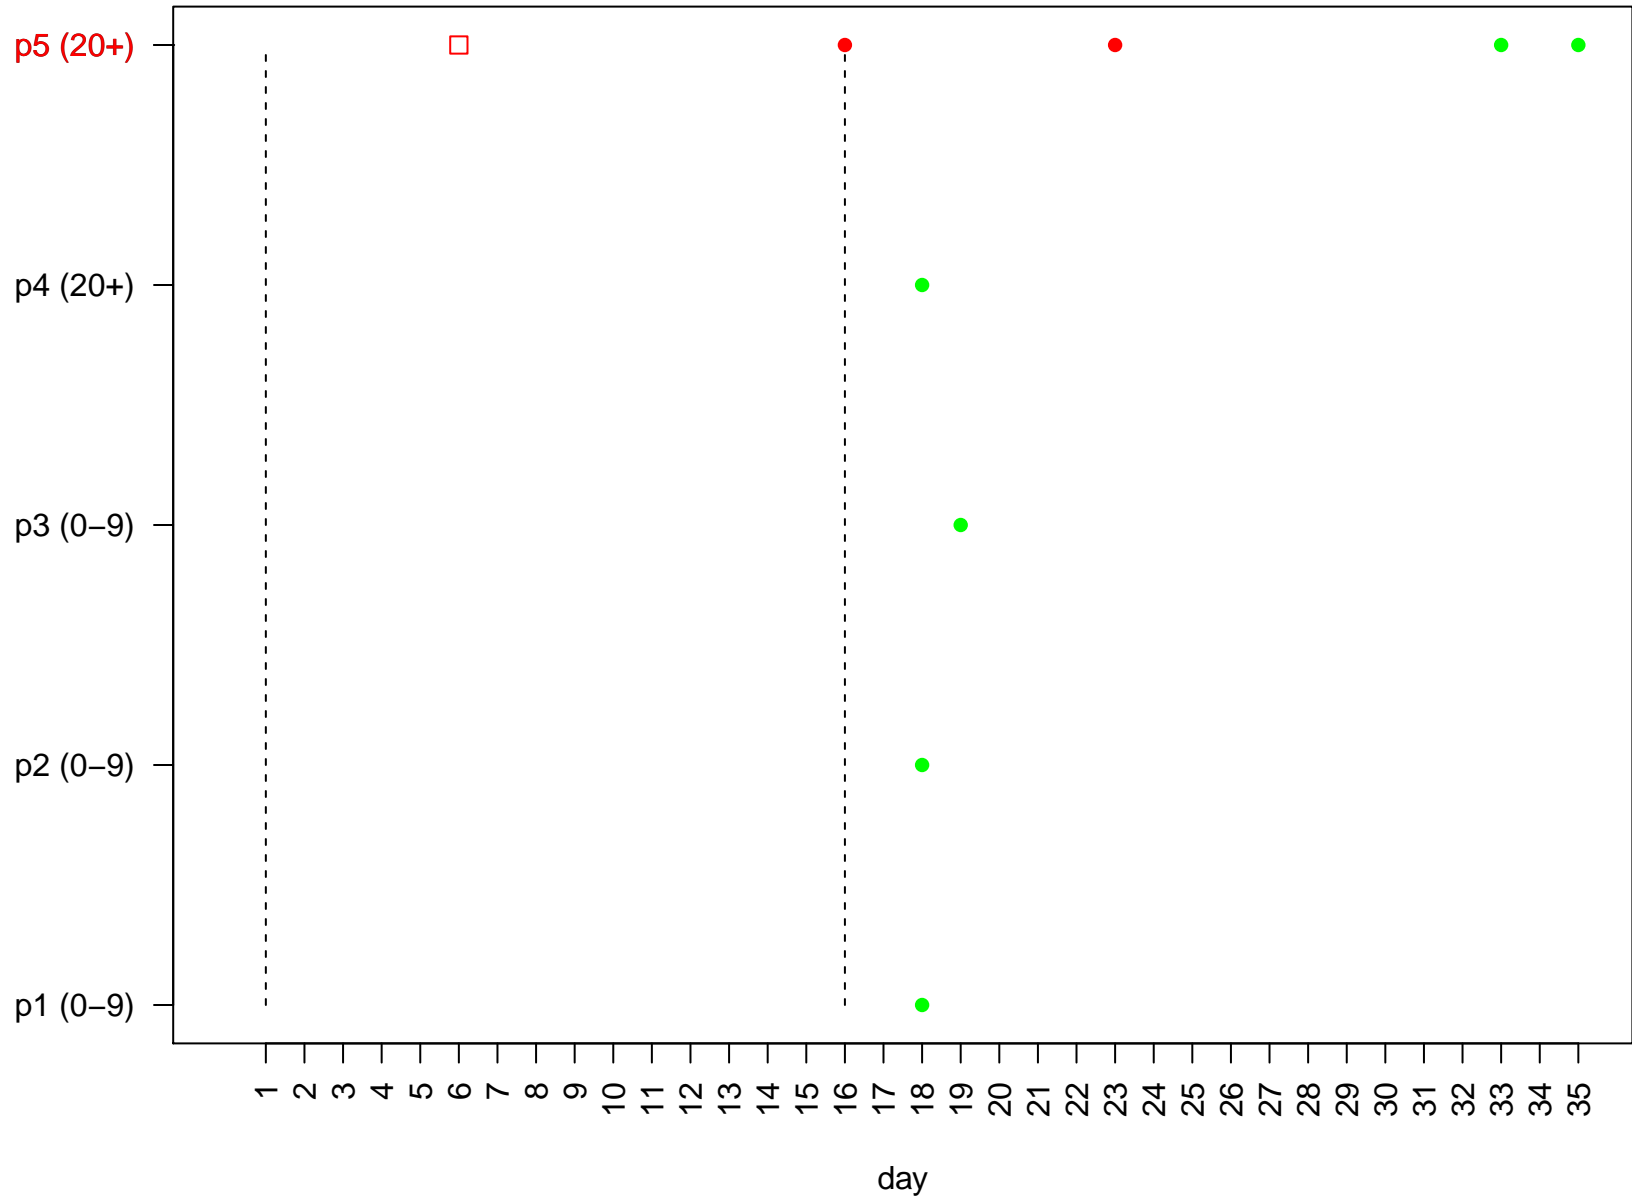

# Household 70

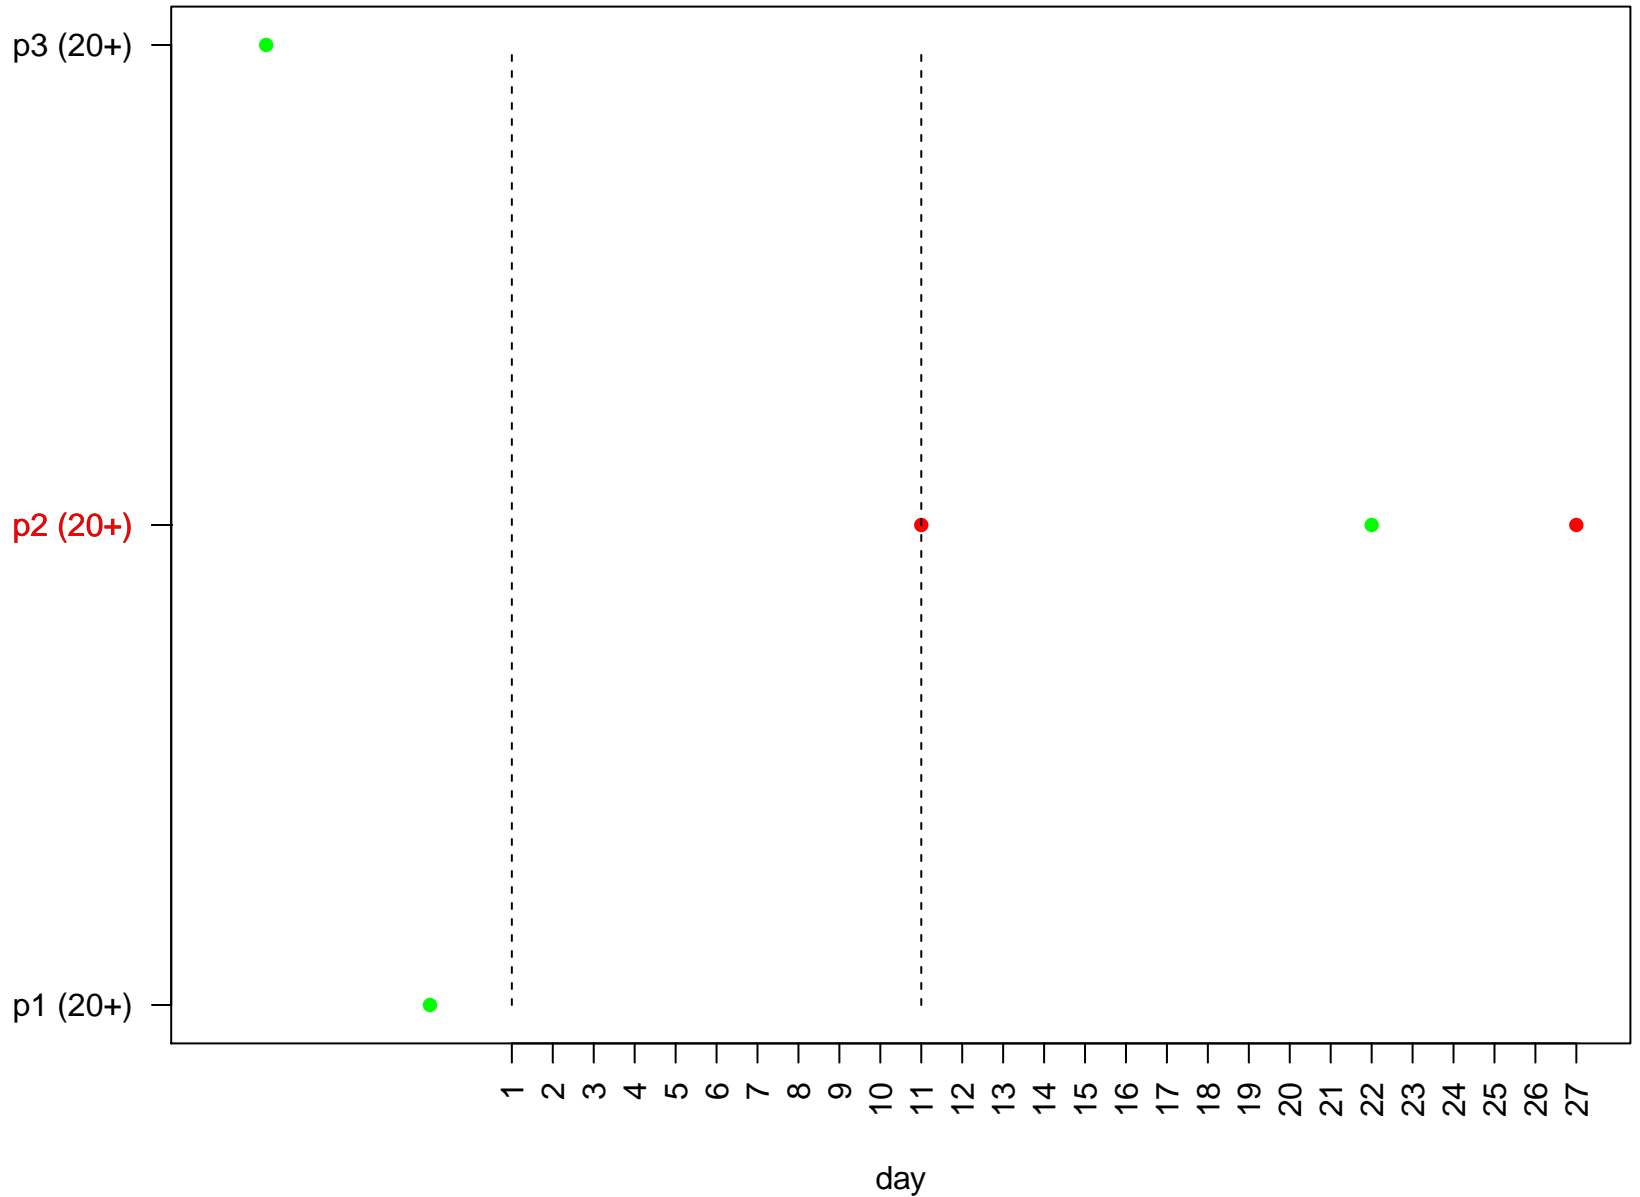

# Household 71

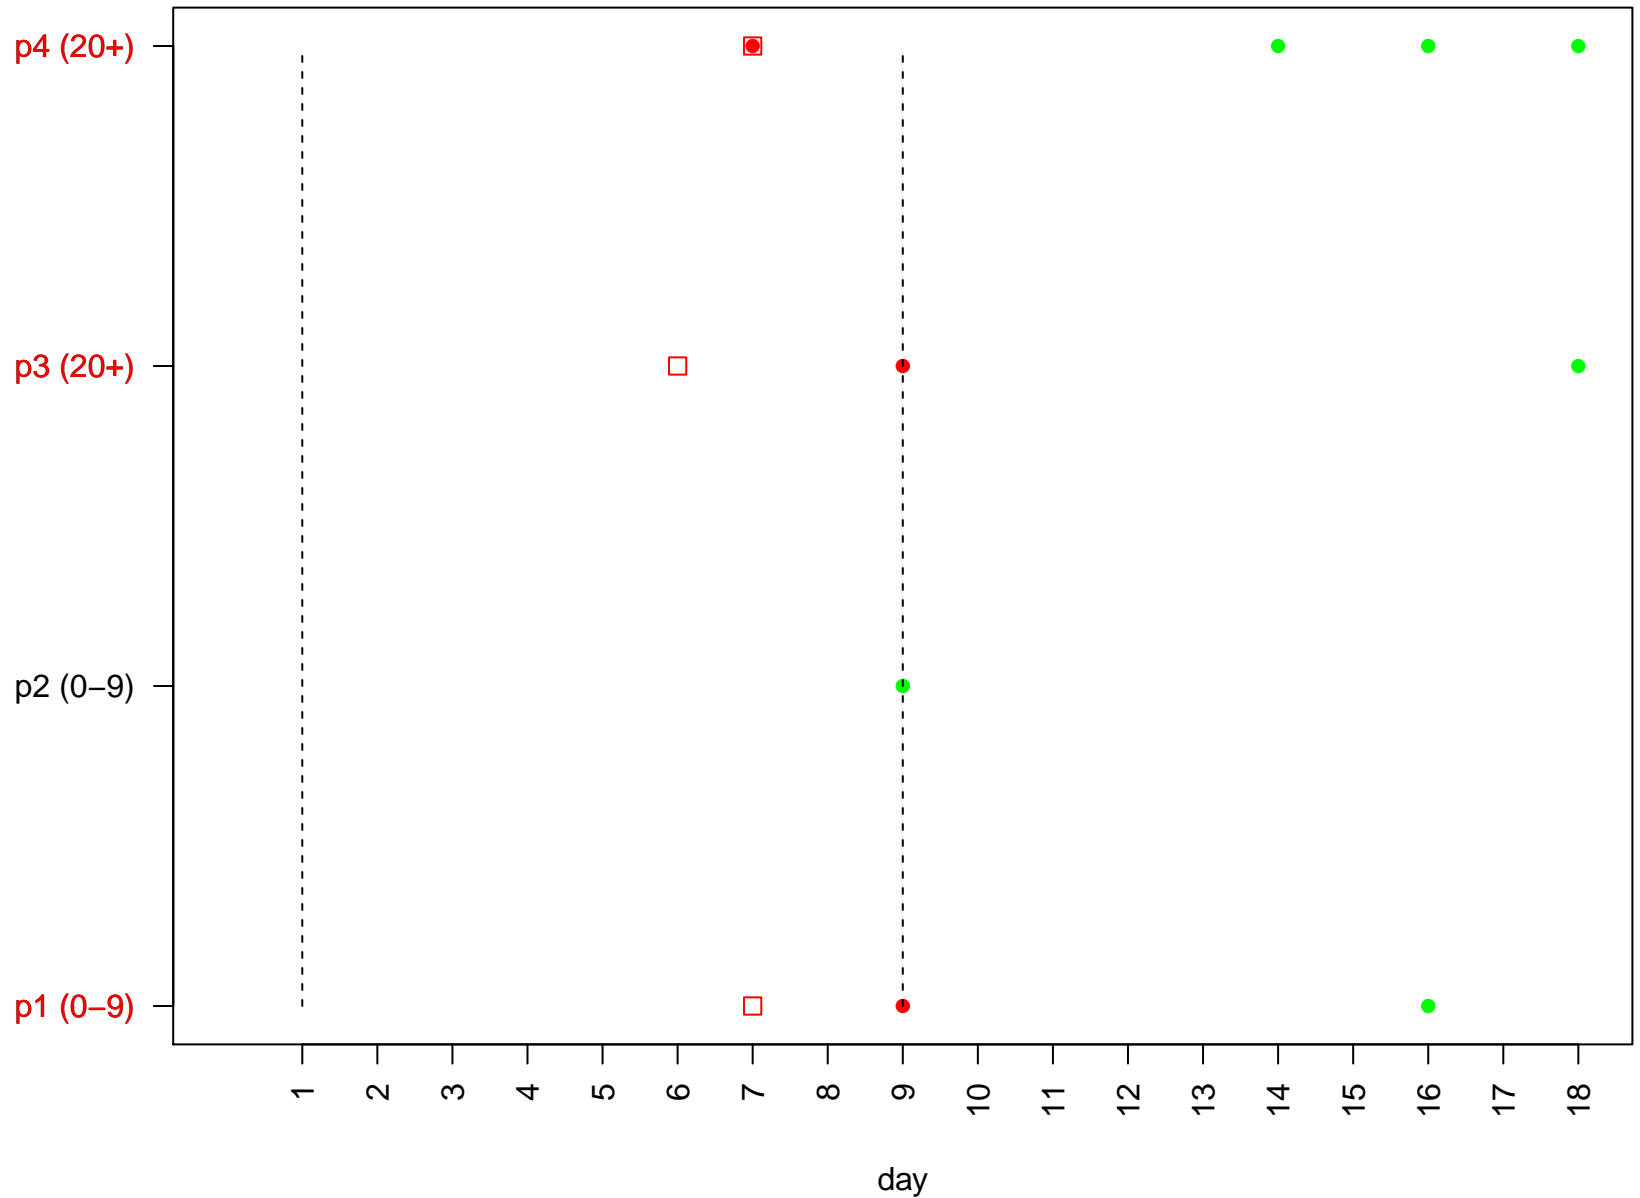

# Household 72

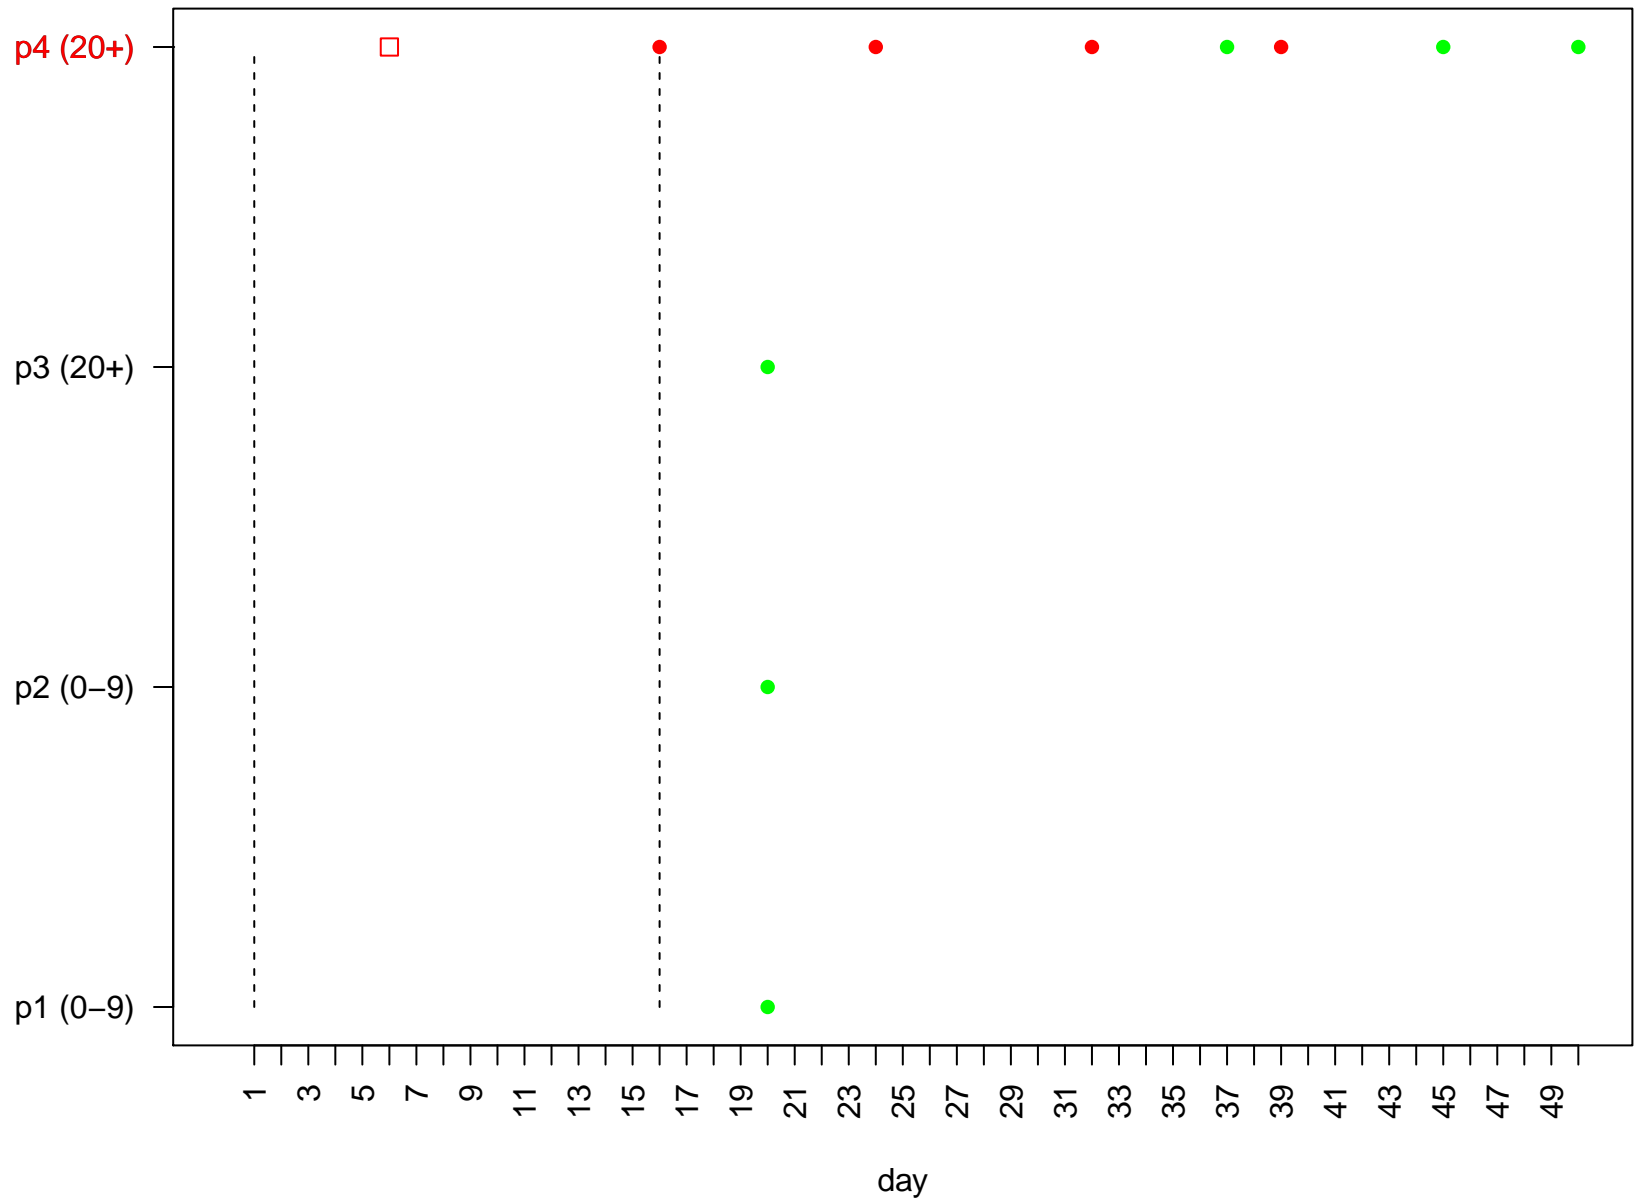

# Household 74

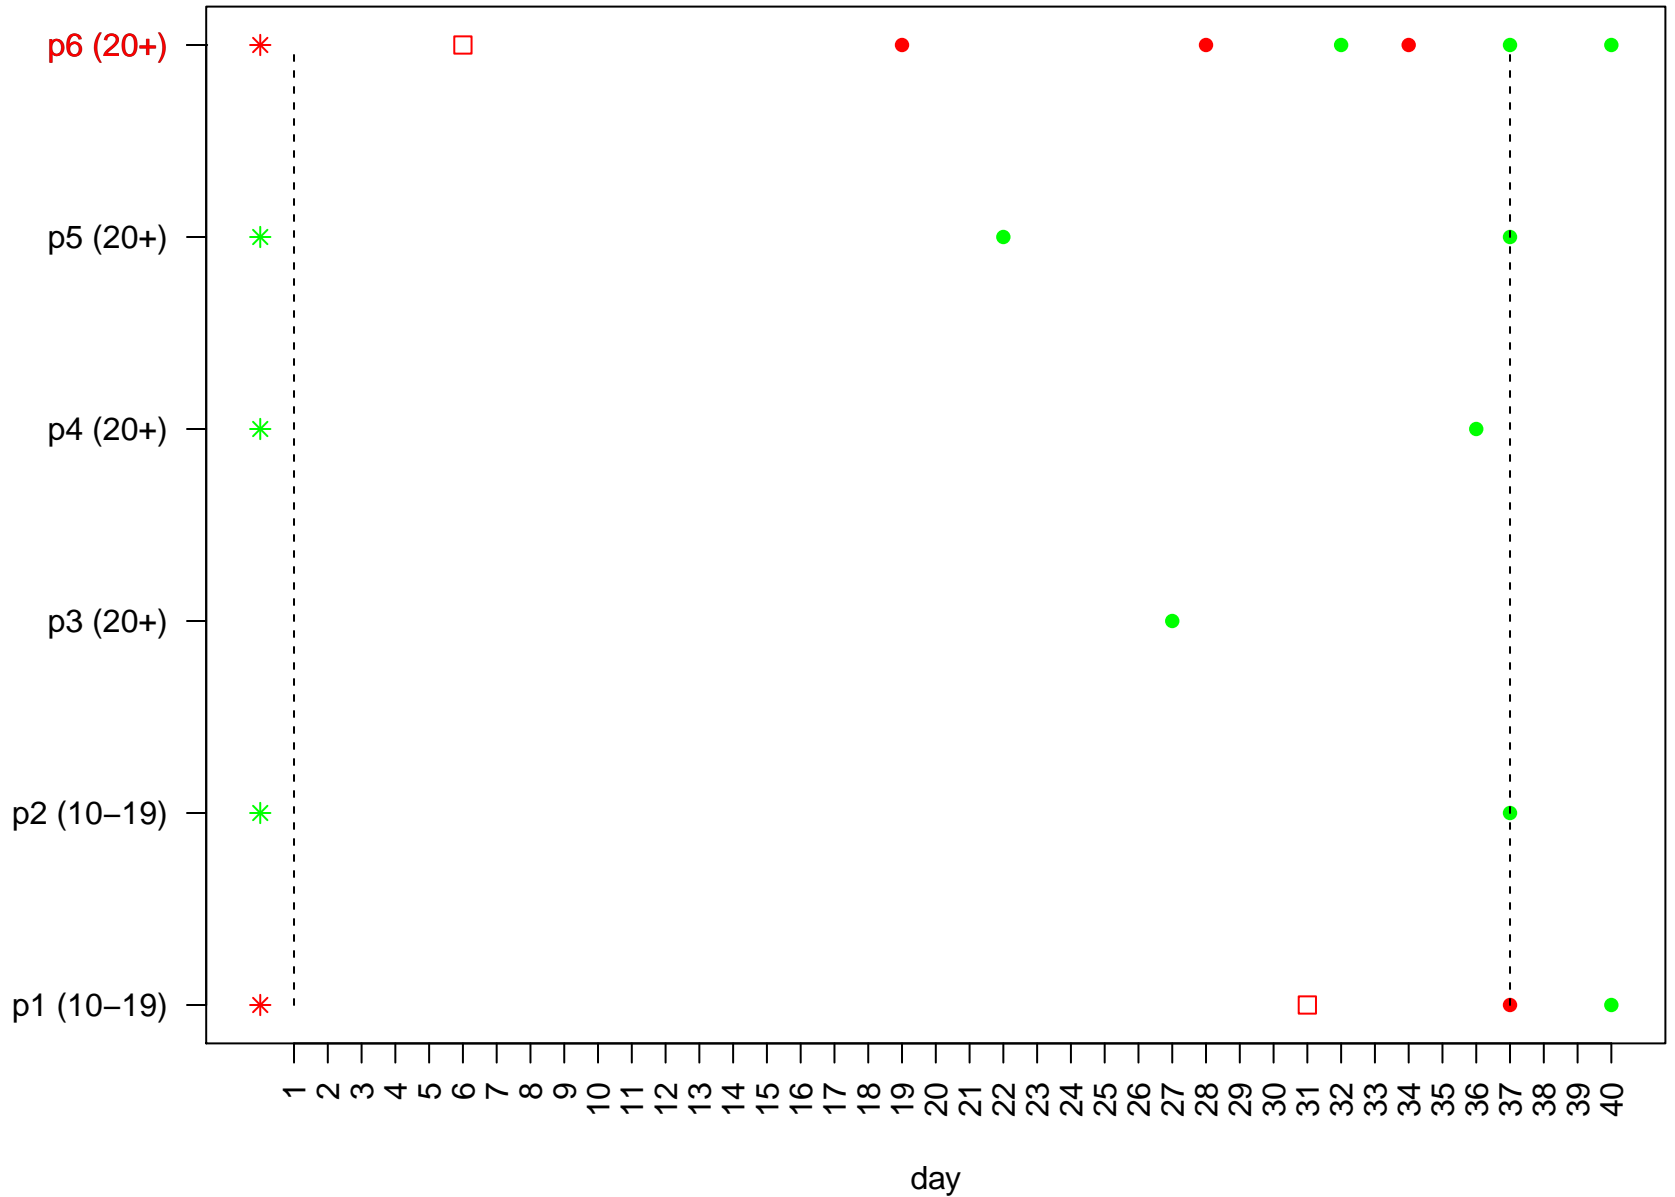





# Household 76

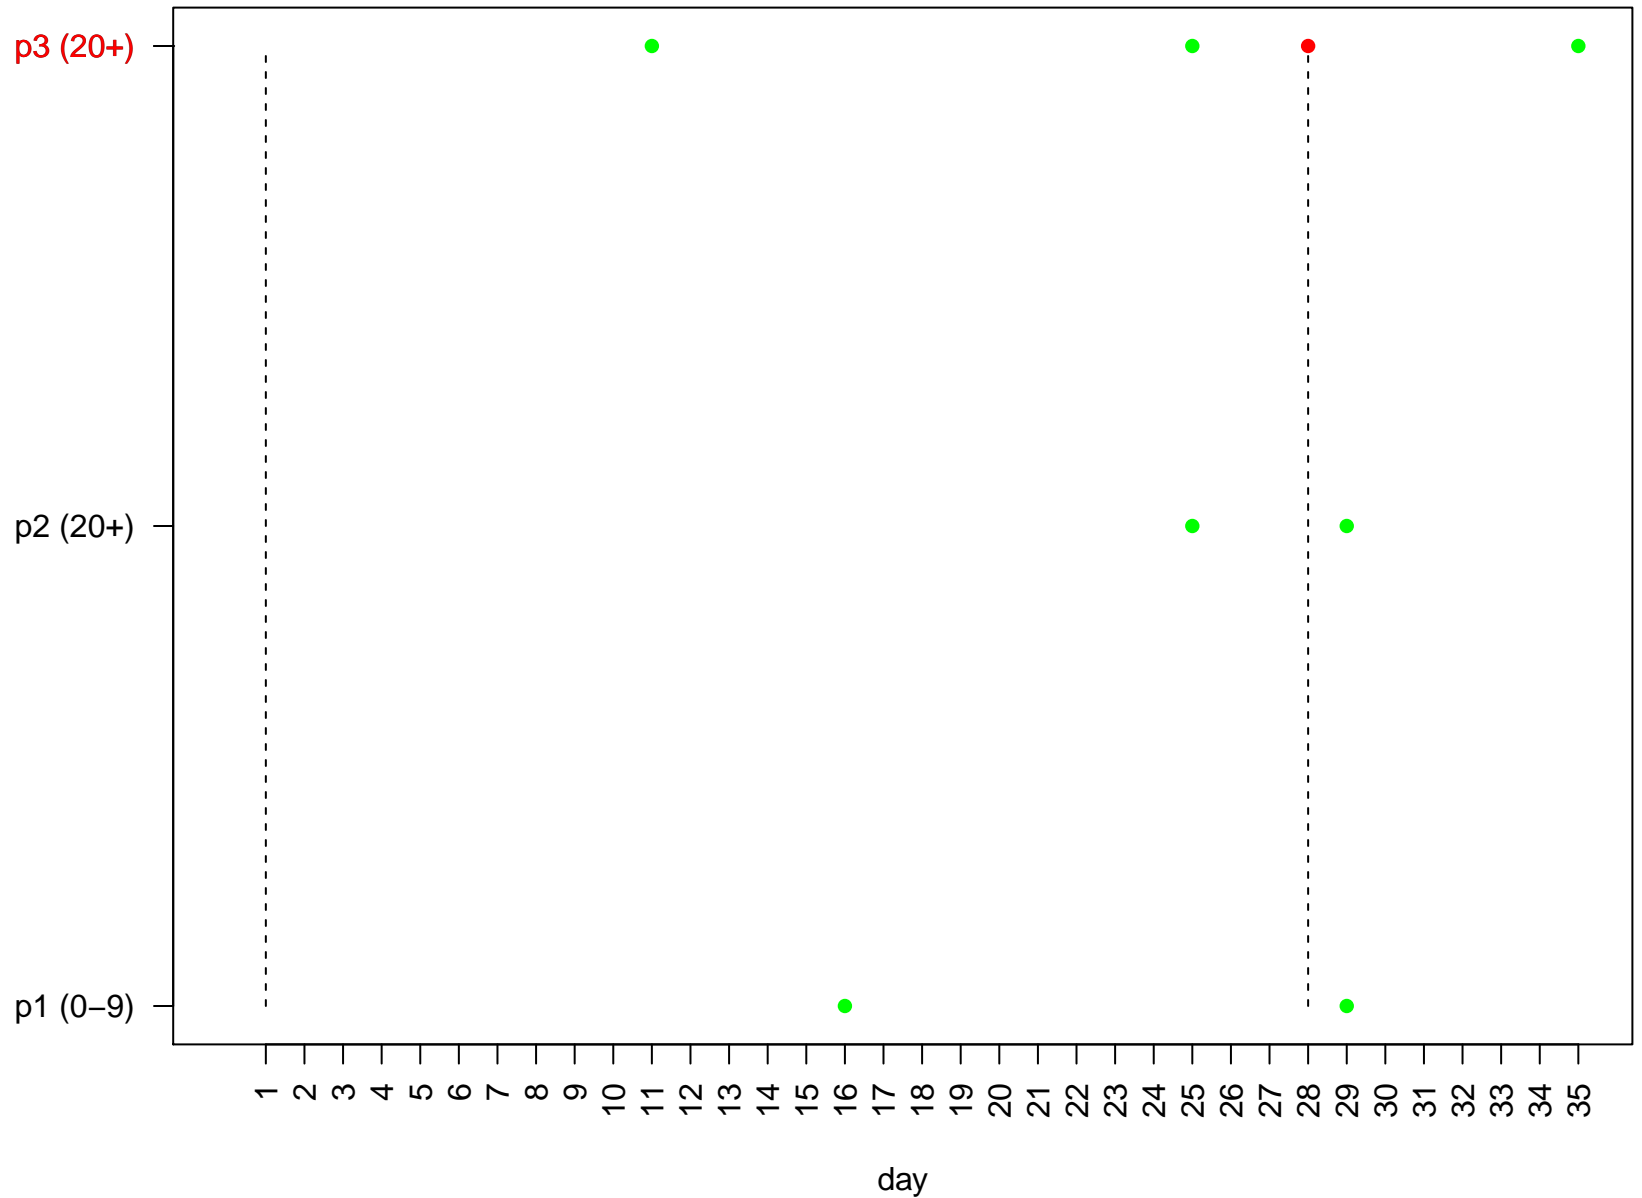

# Household 77

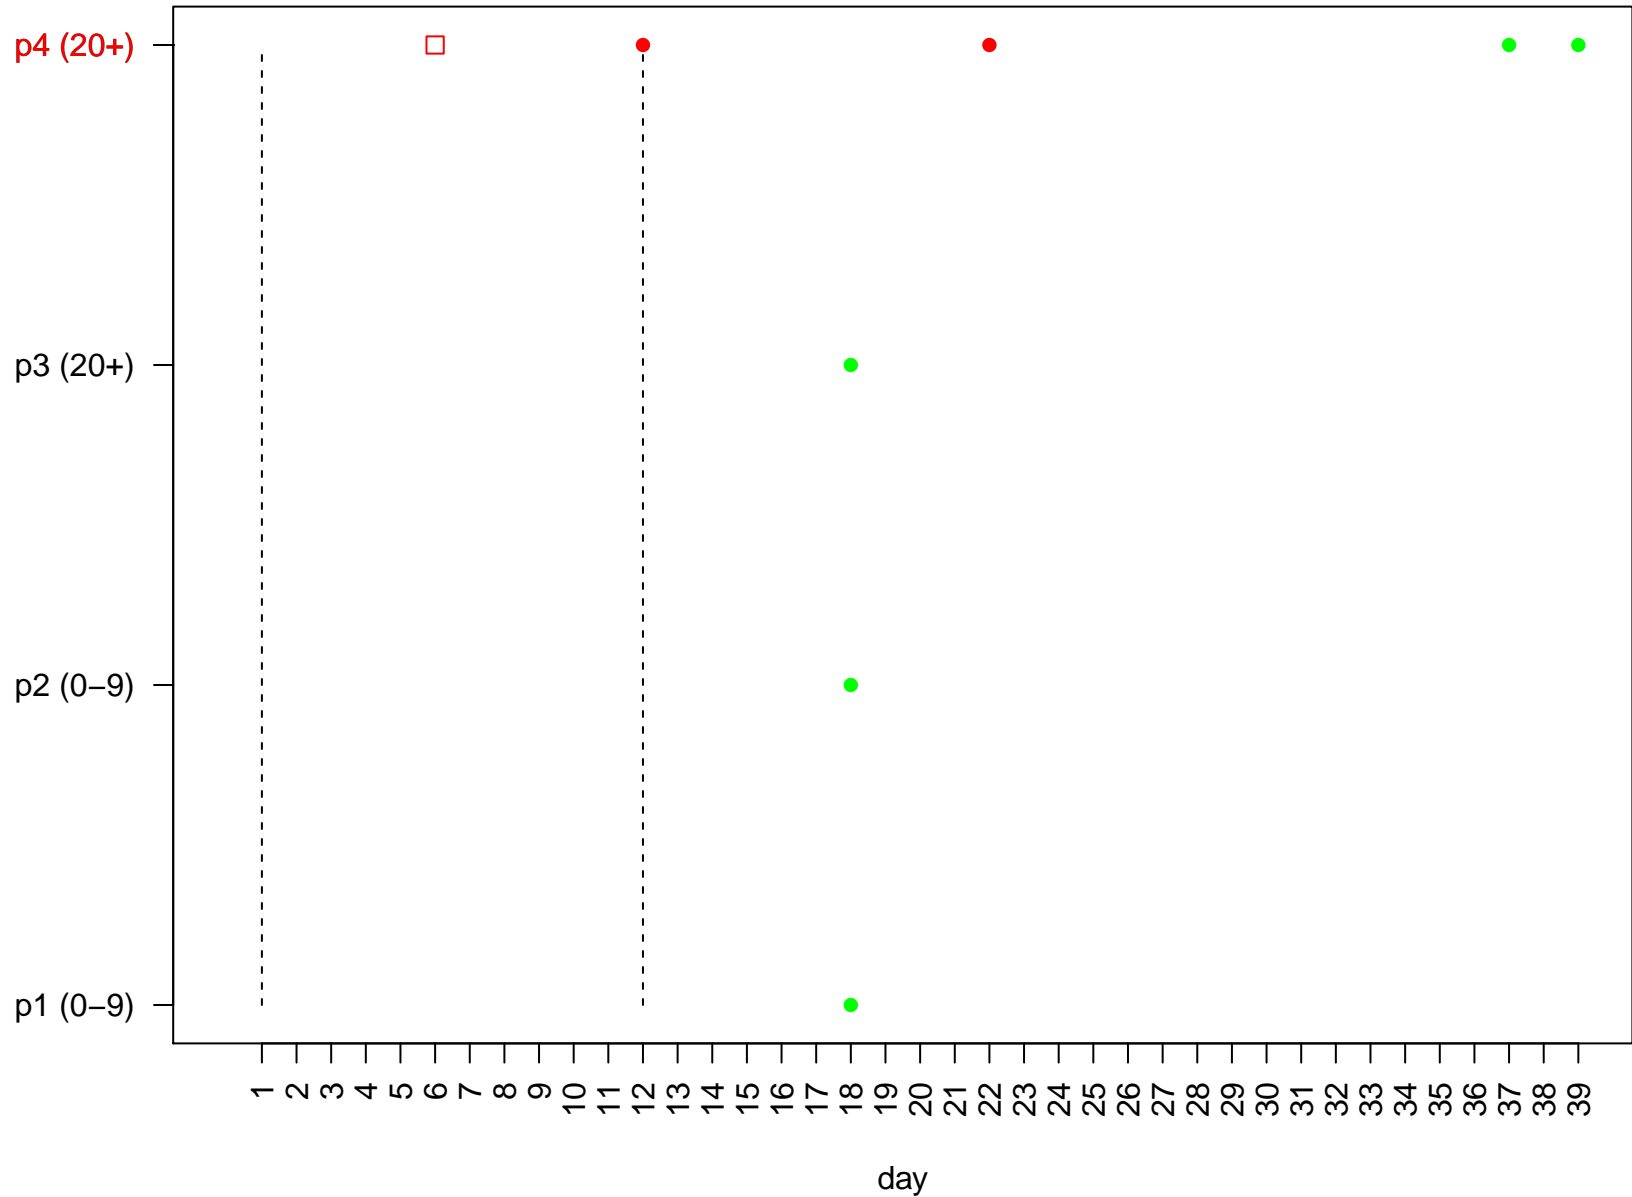

# Household 78

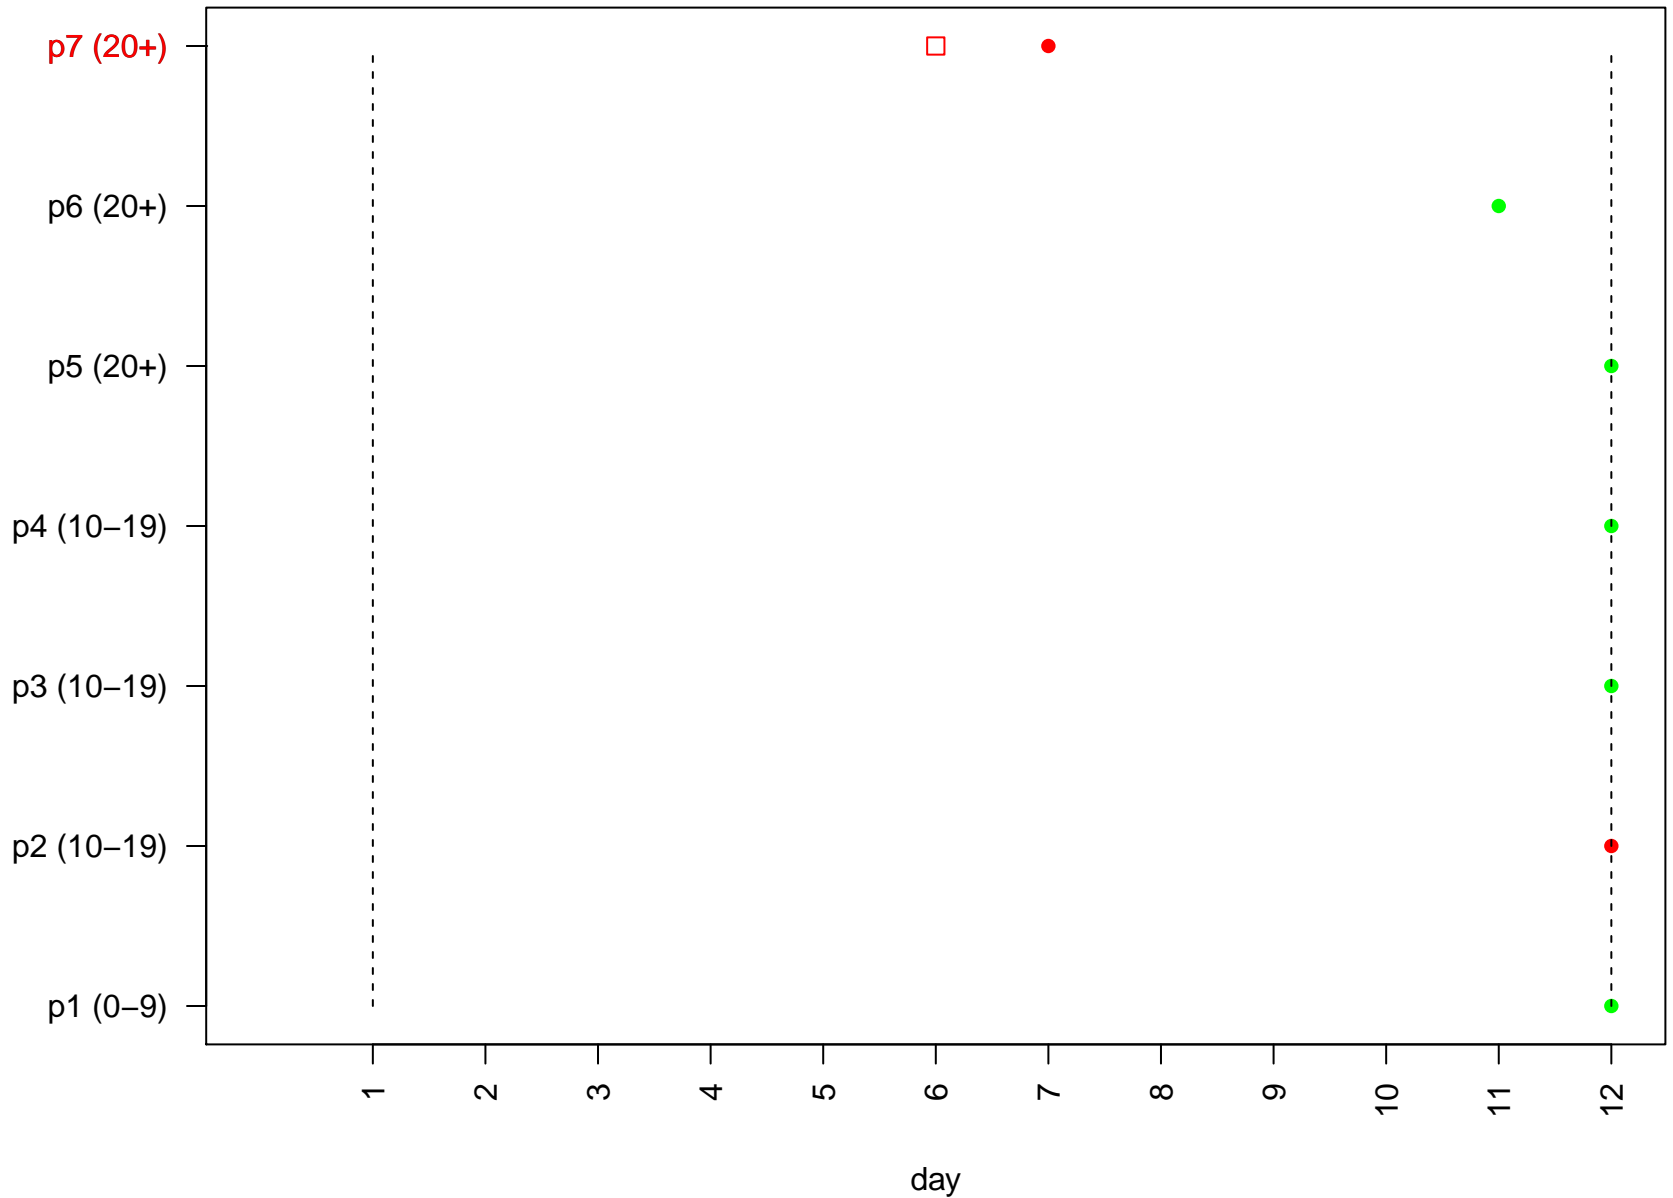

# Household 79

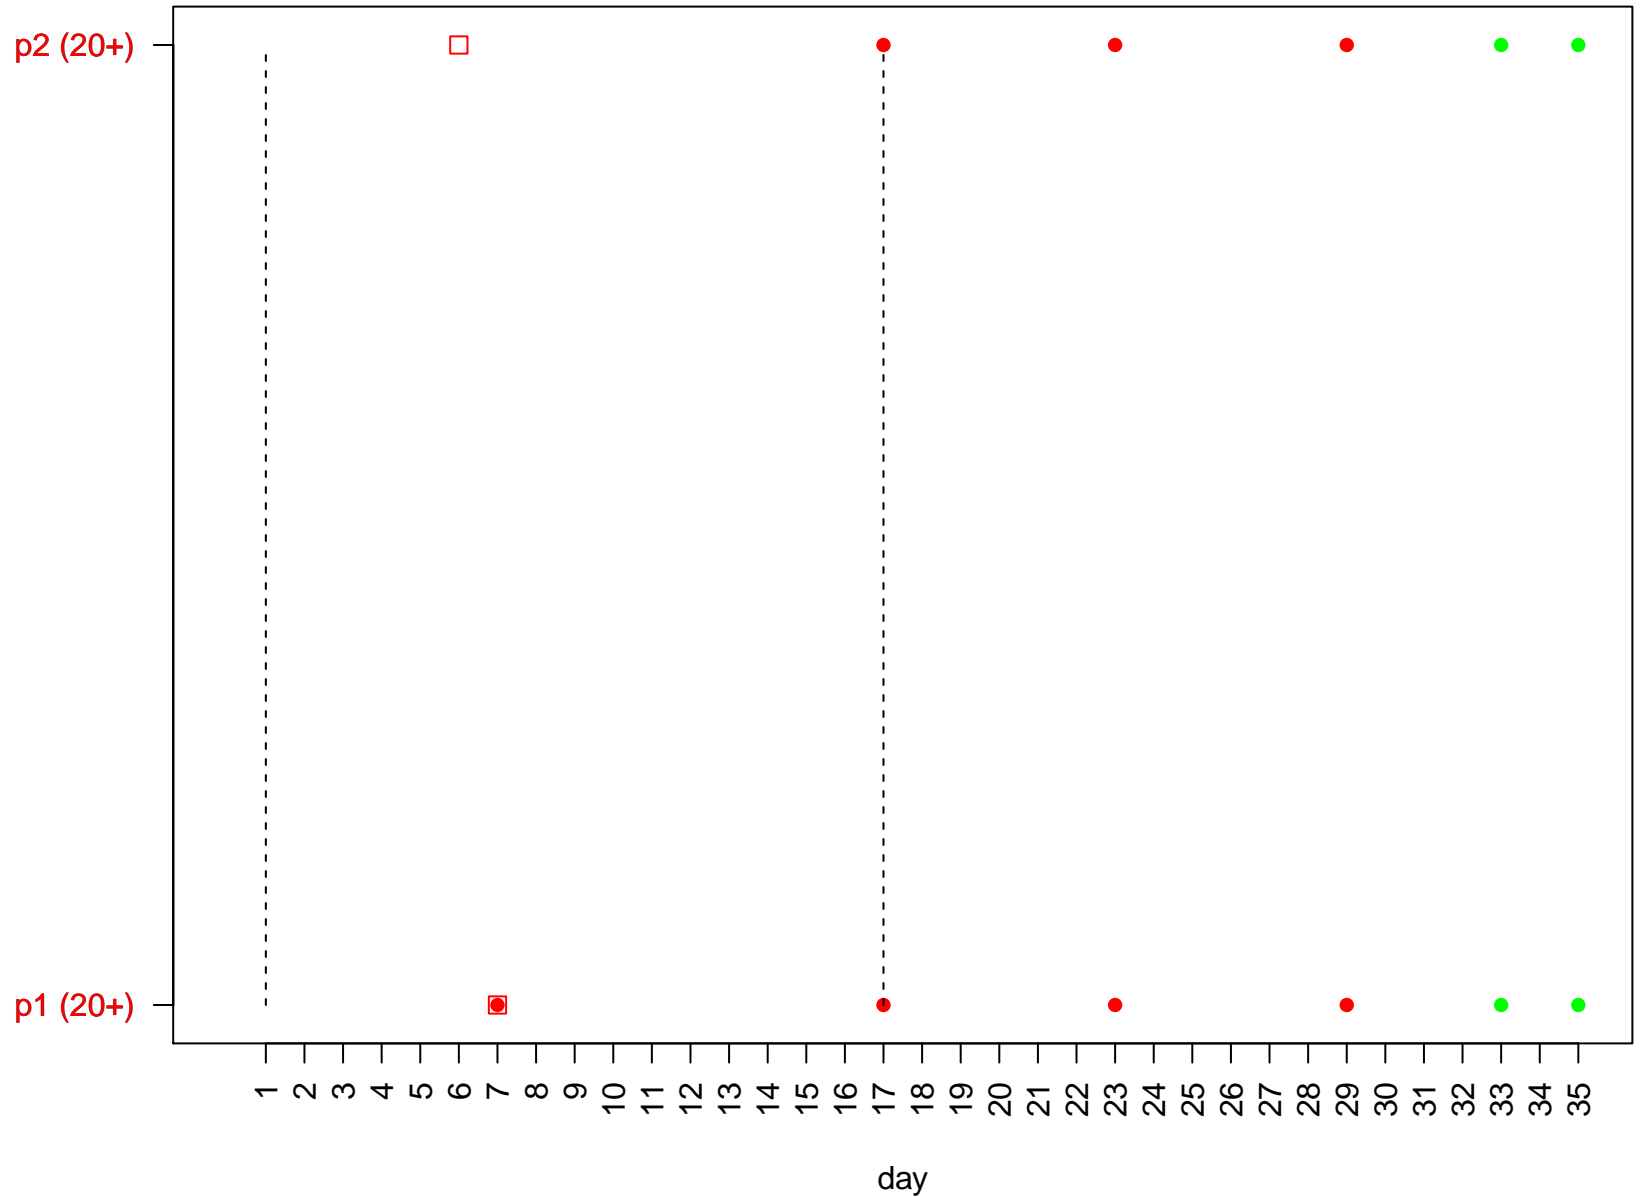

# Household 80

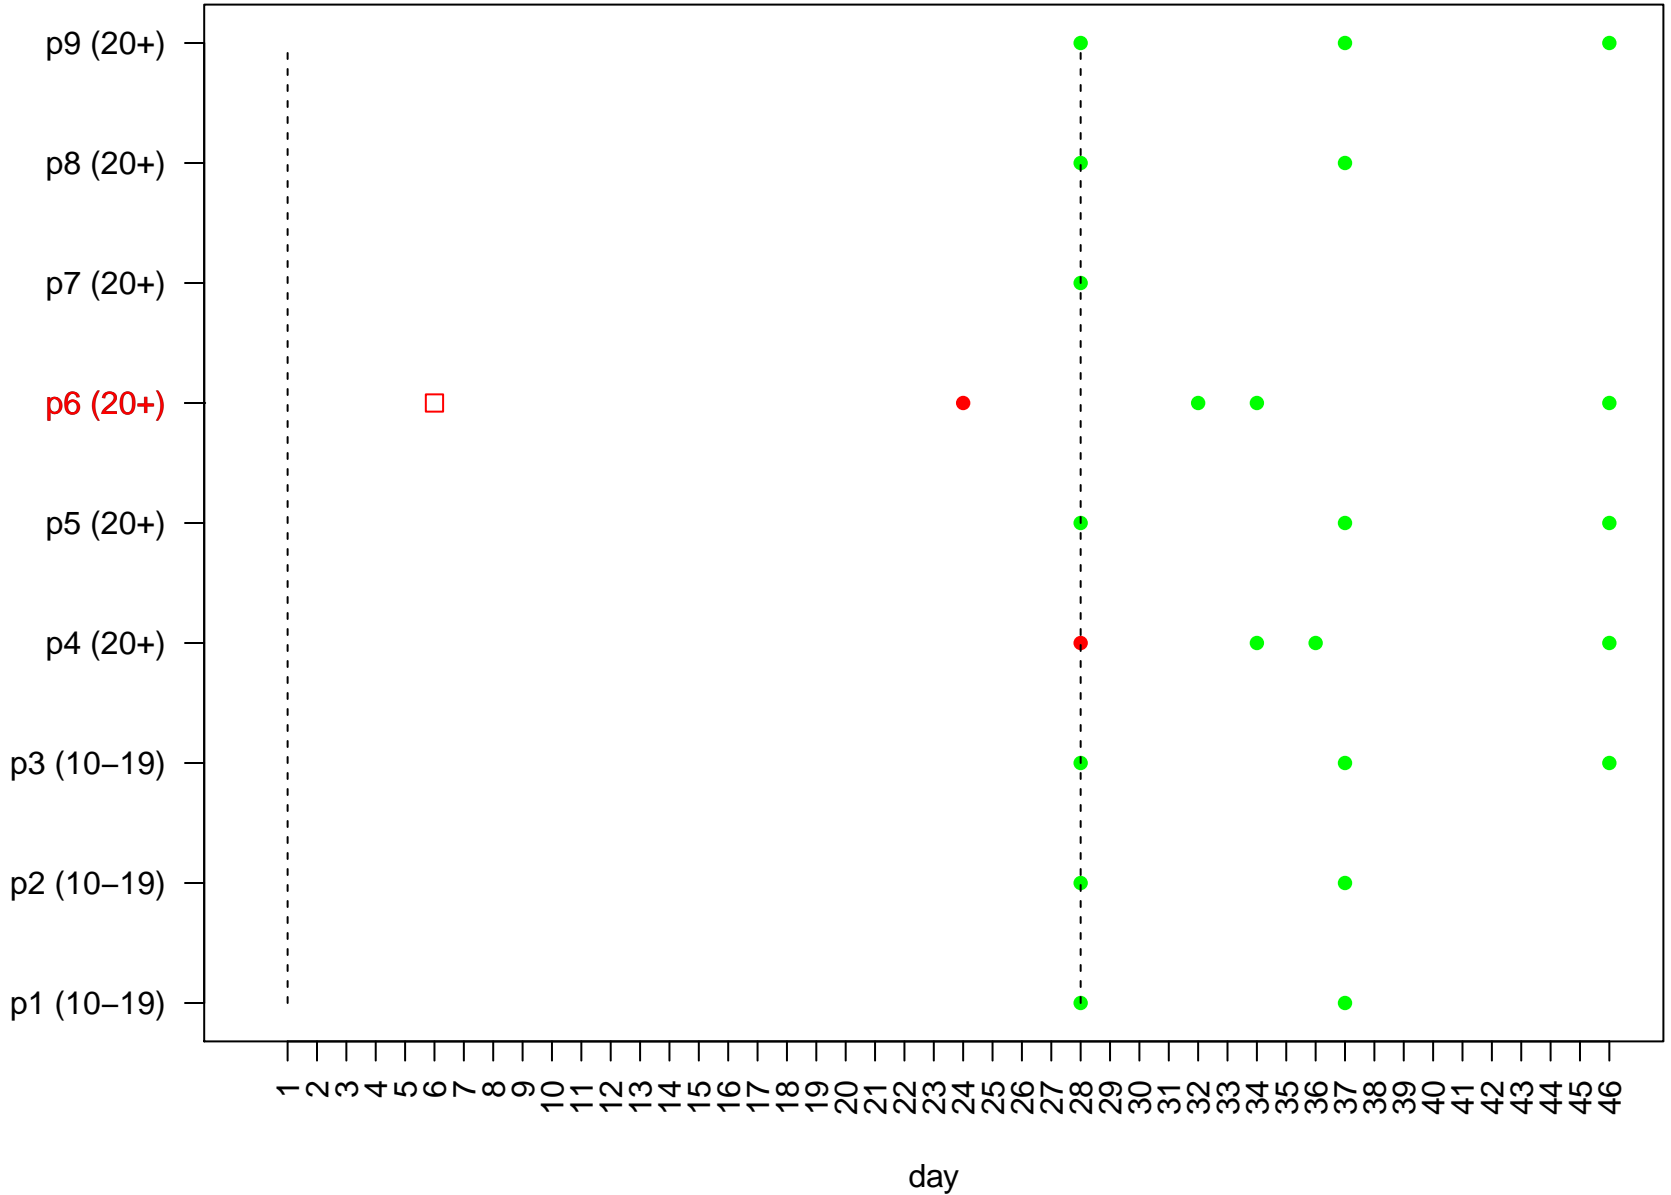

# Household 81

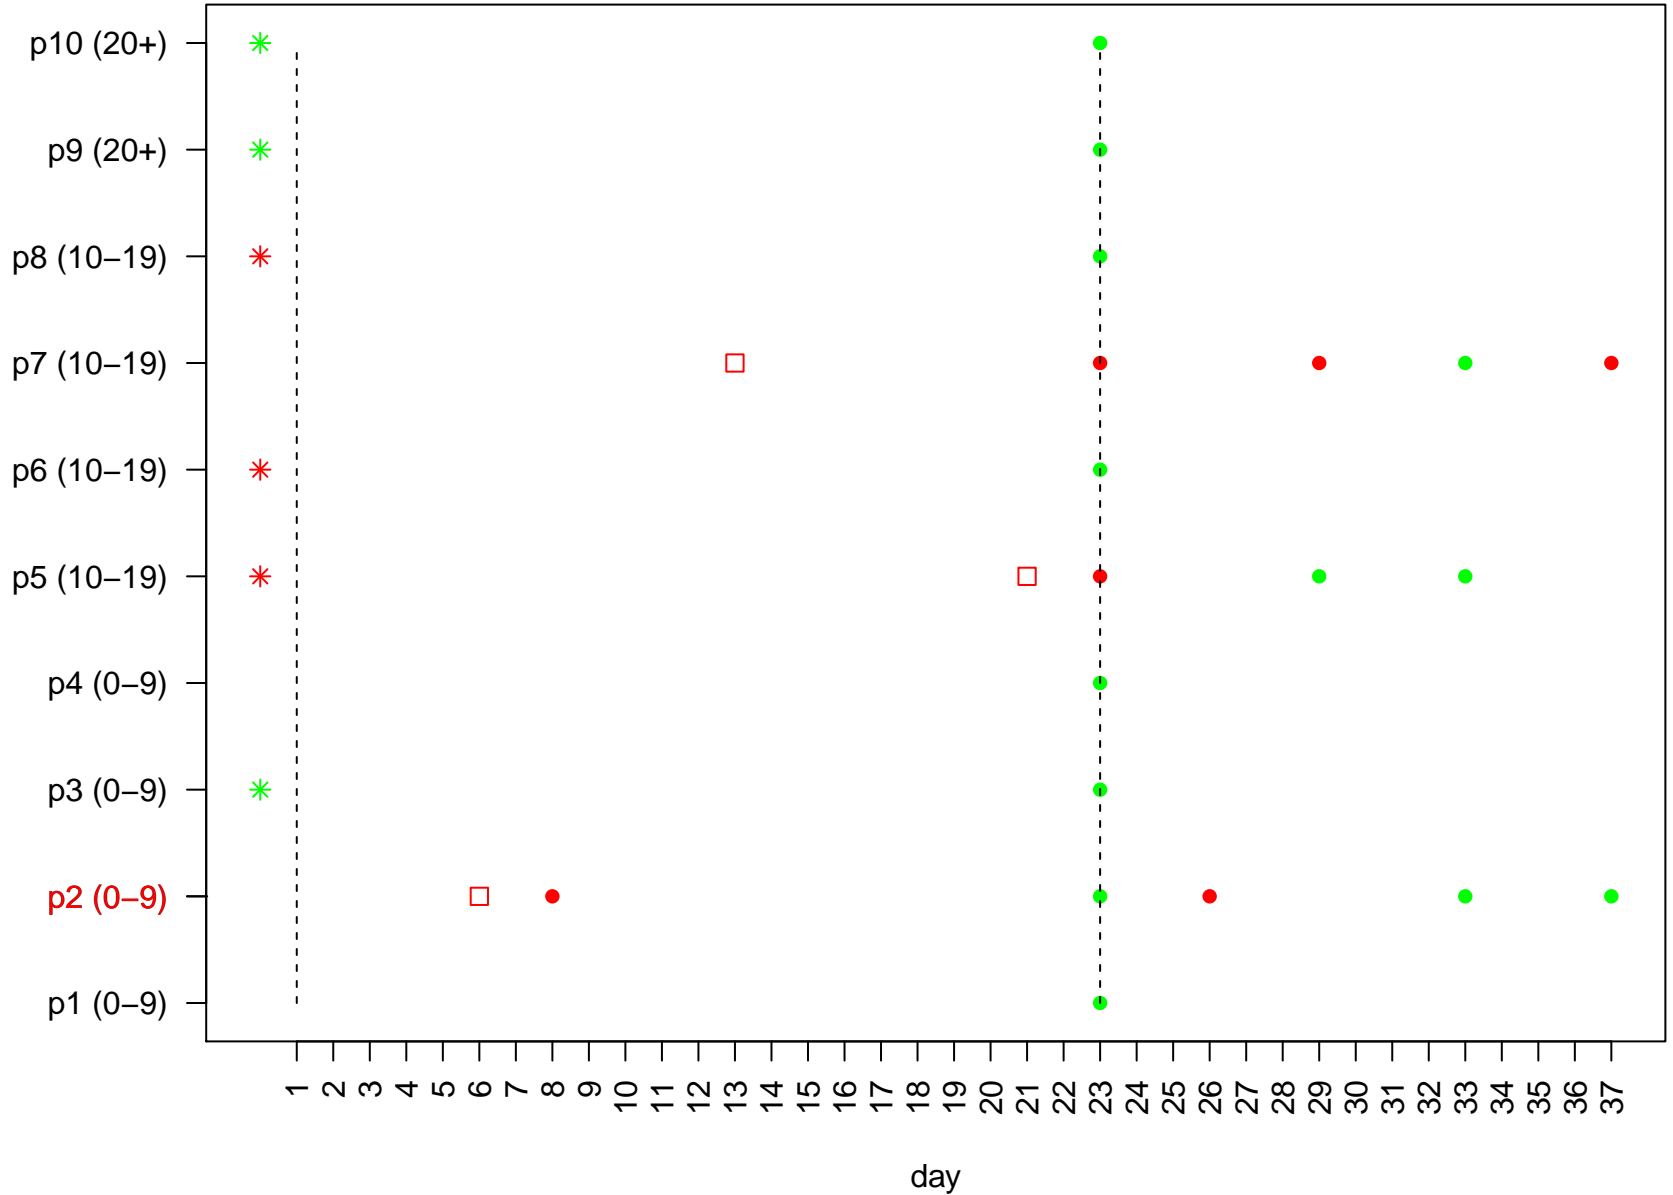

# Household 82

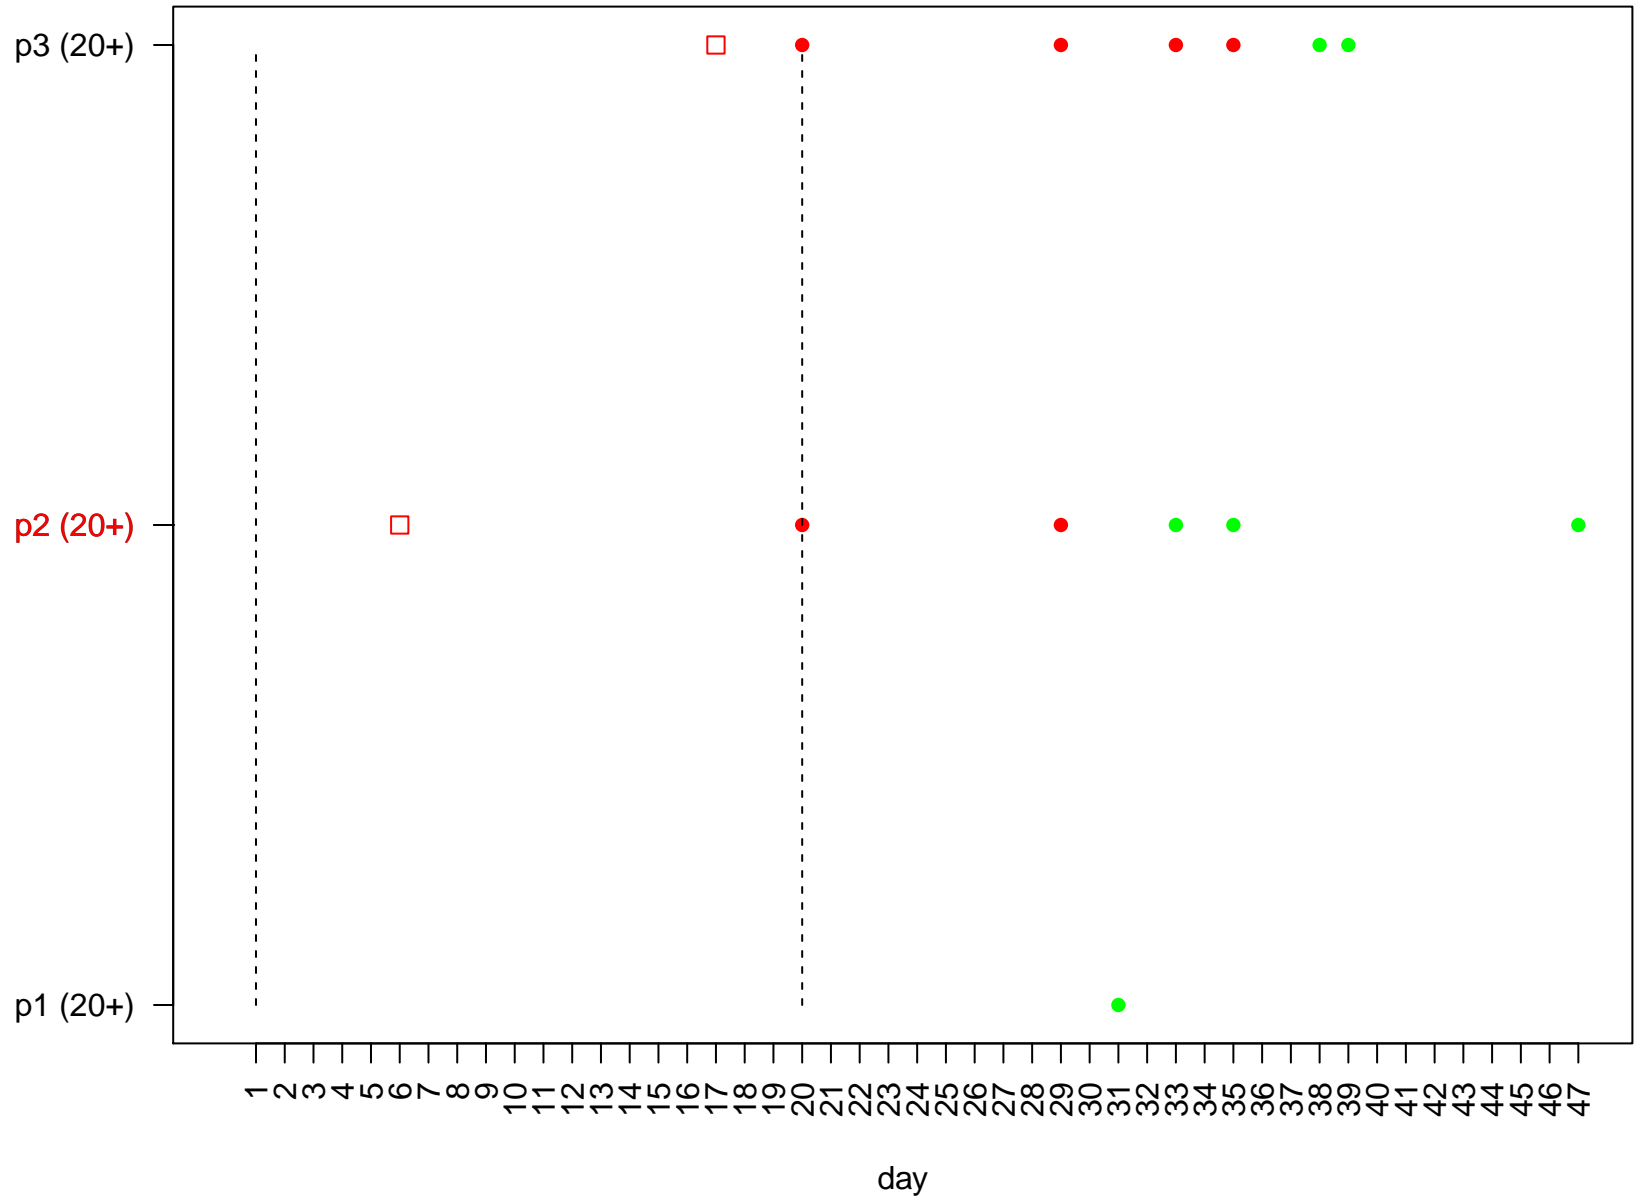

# Household 83

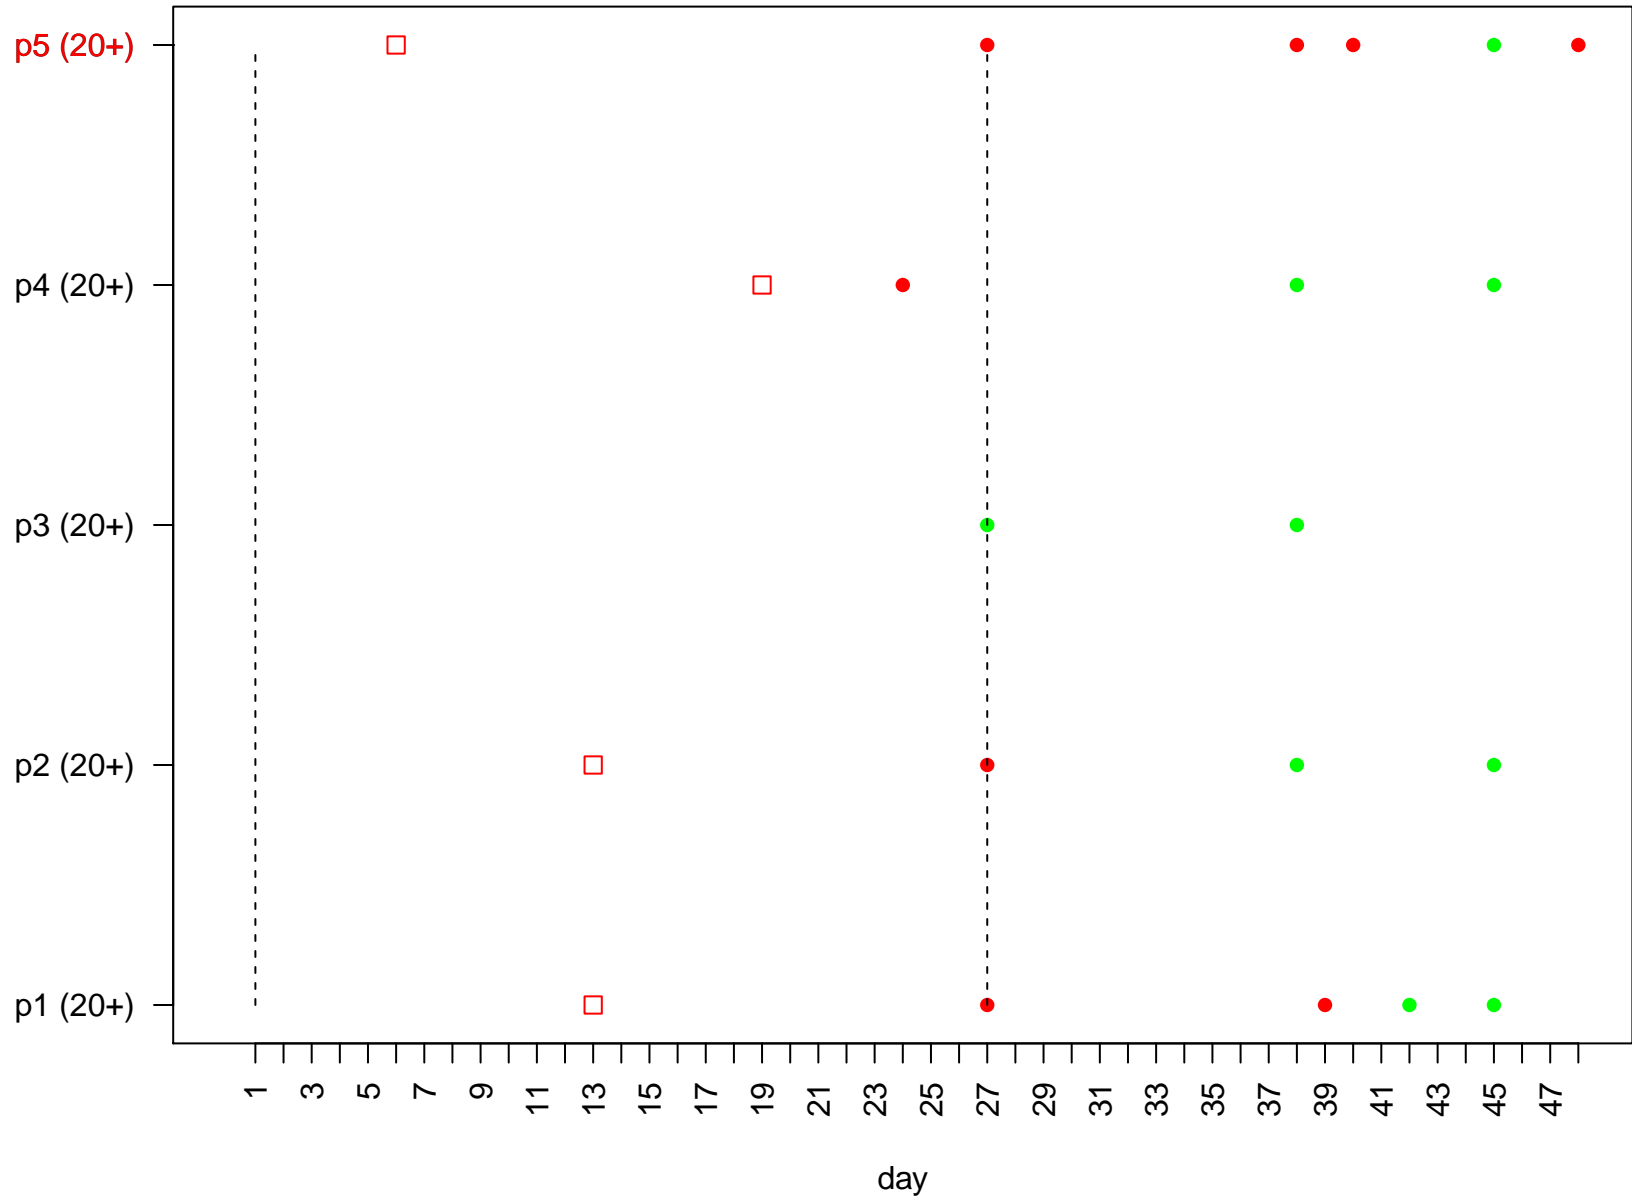



# Household 84

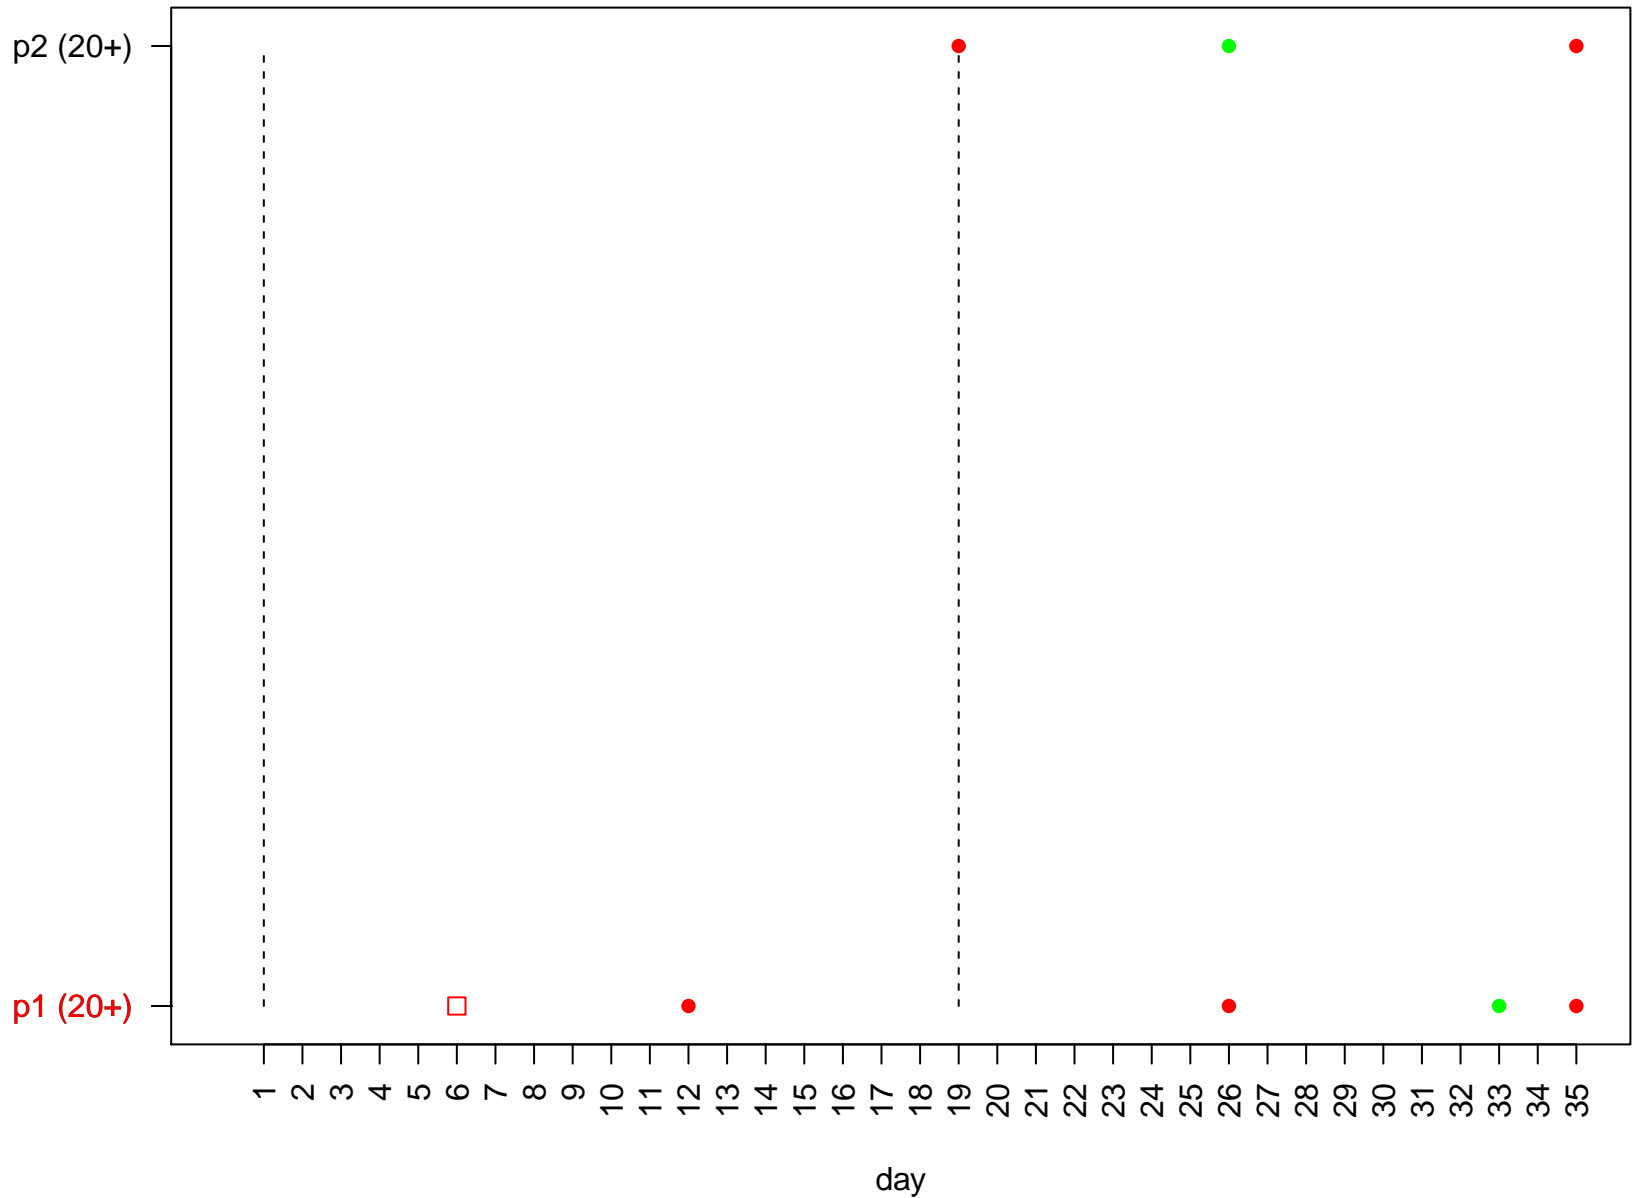

# Household 85

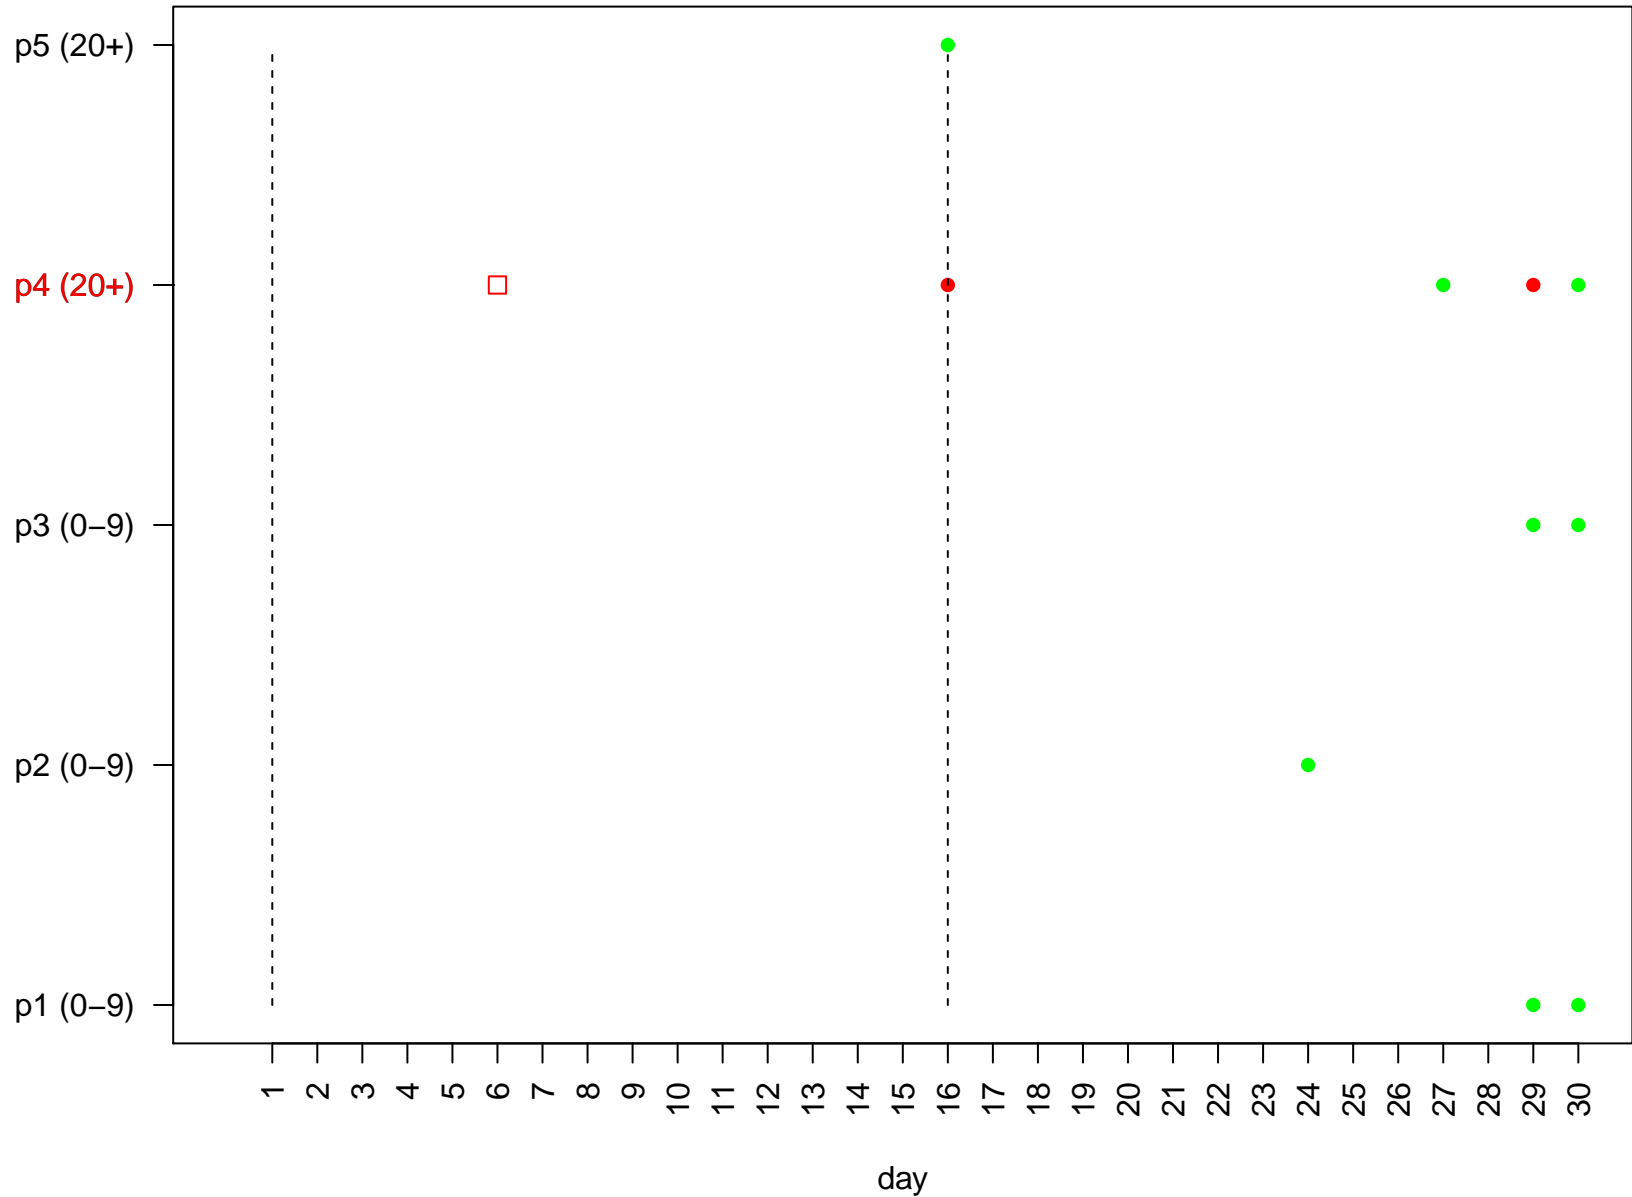

# Household 87

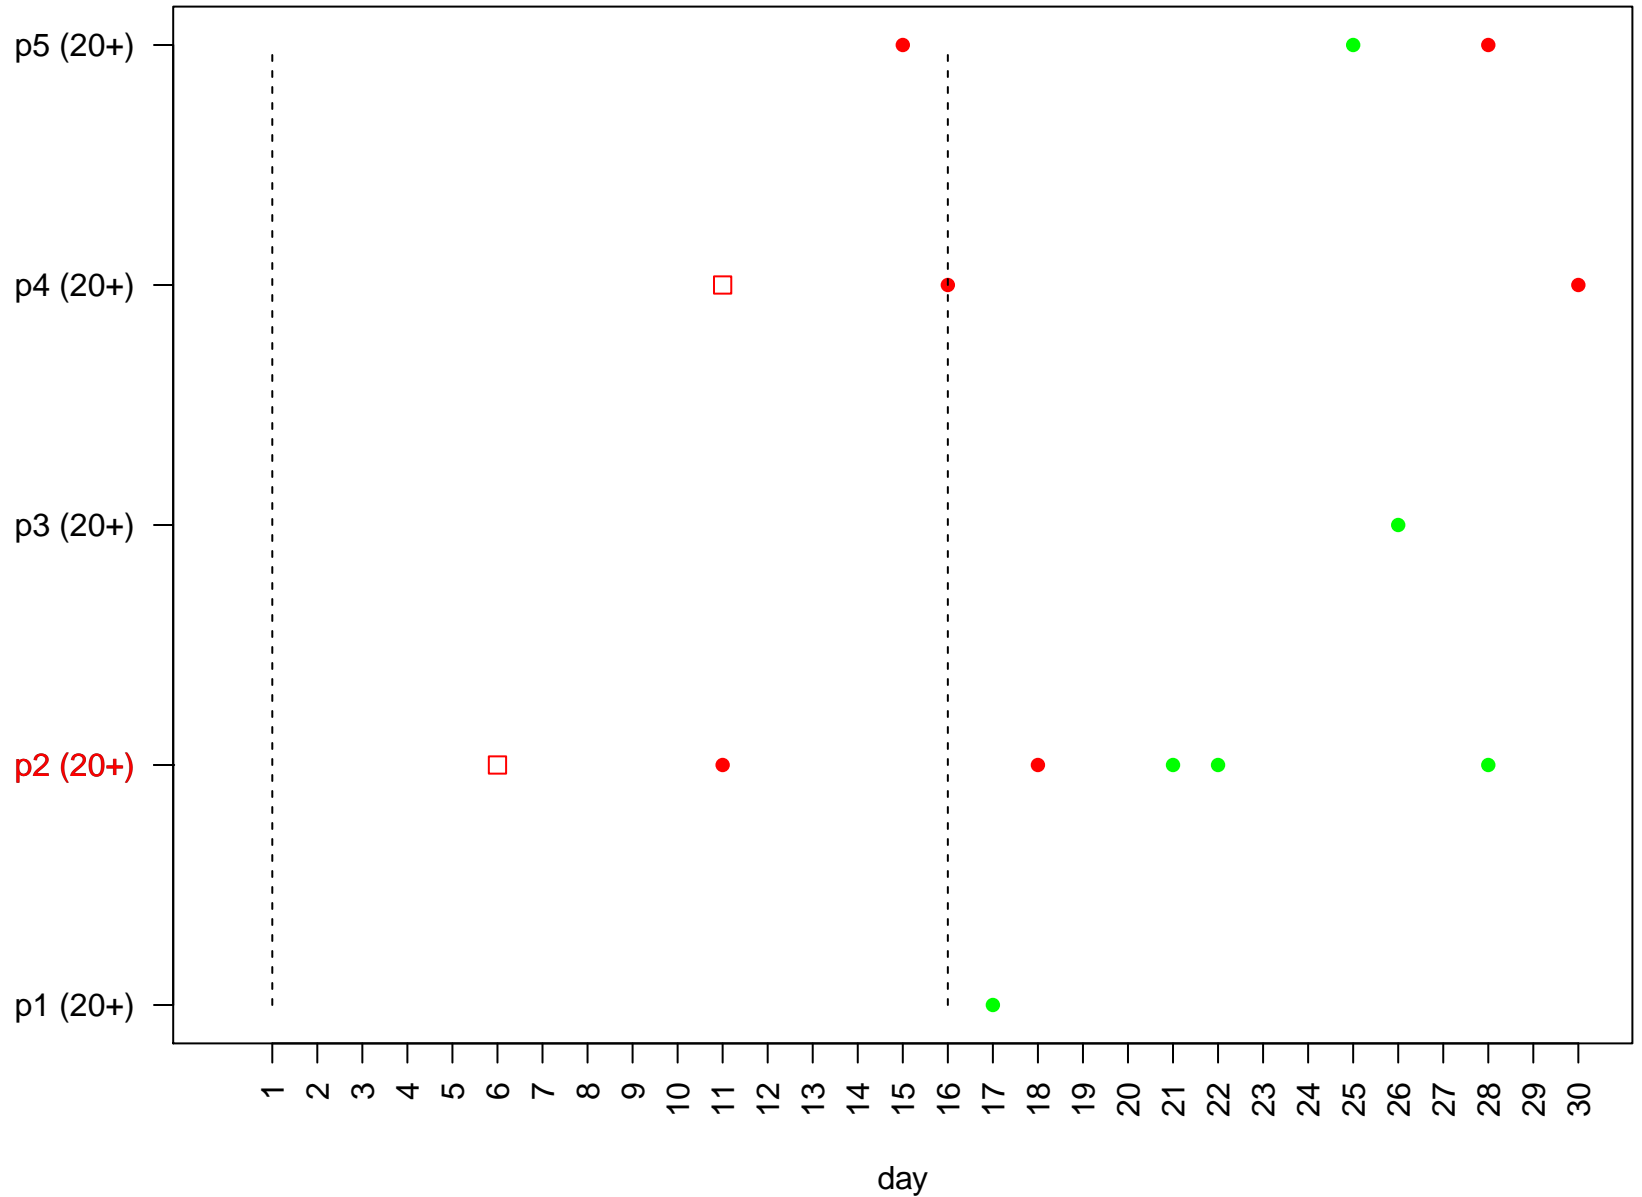



# Household 89

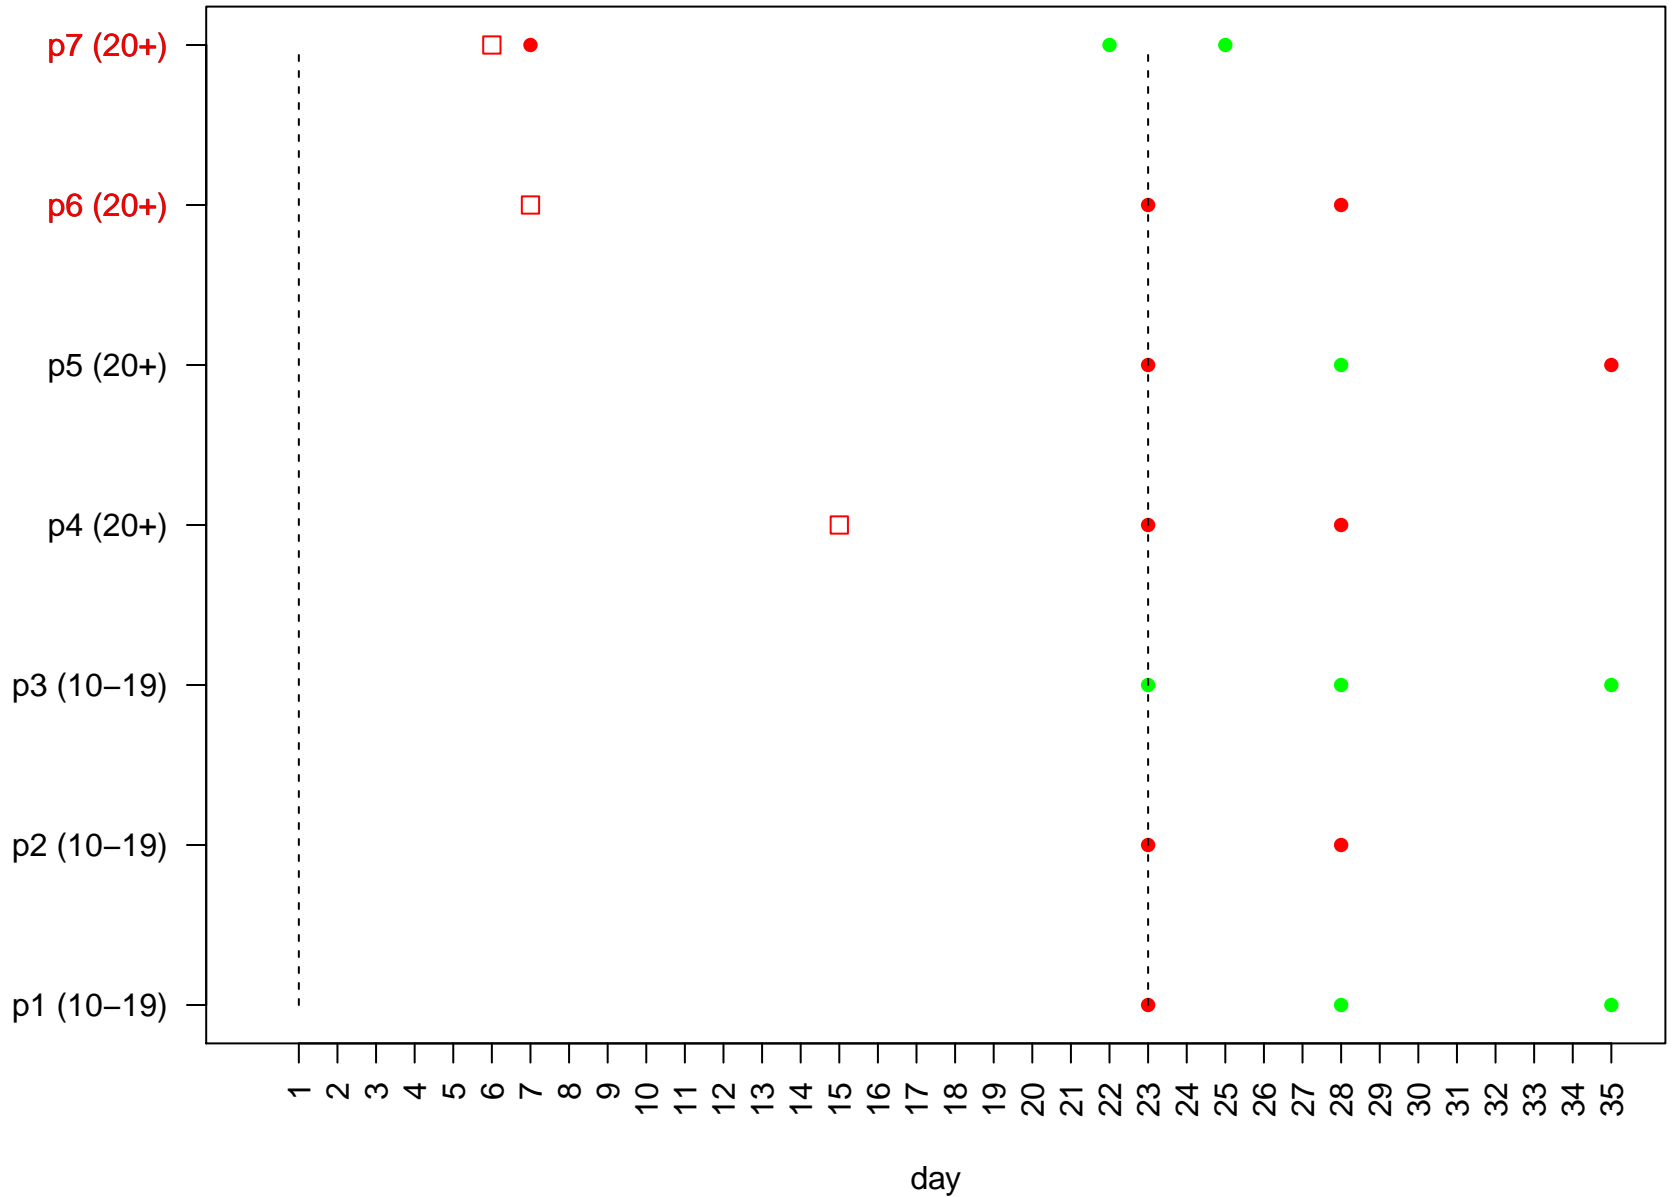

# Household 90

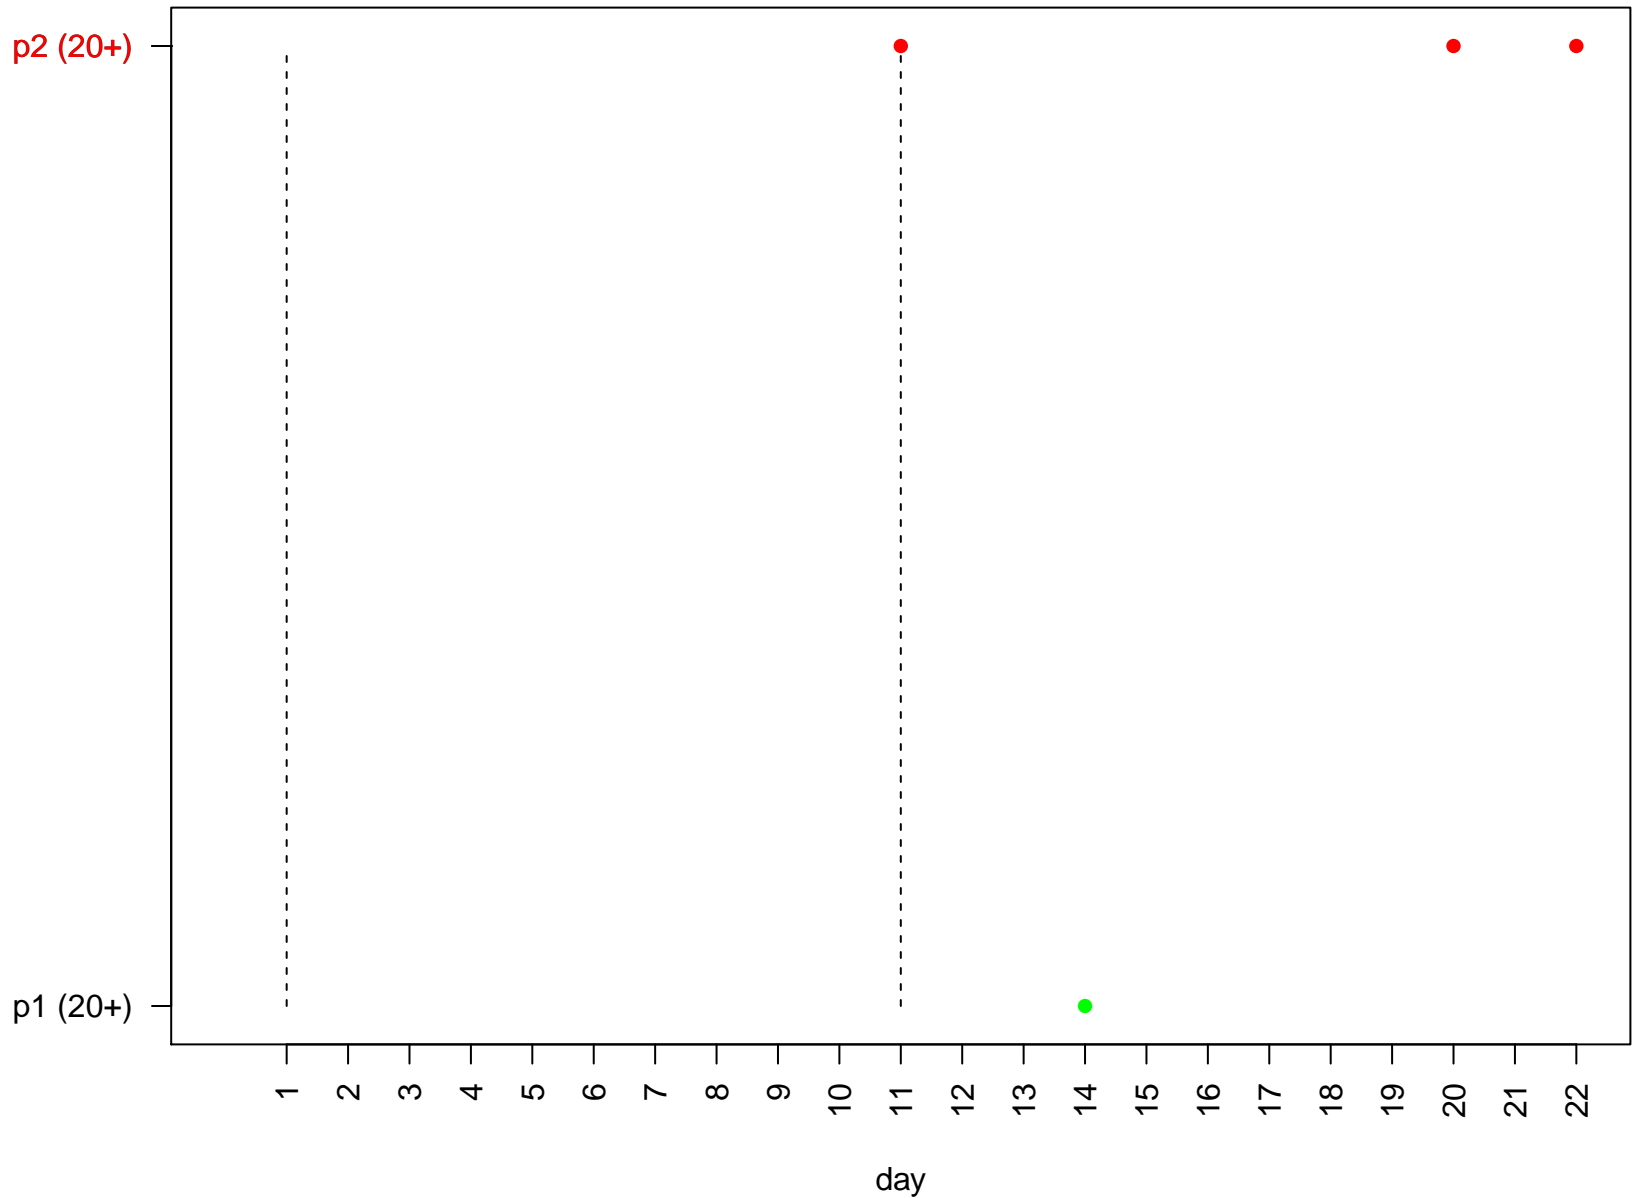

# Household 91

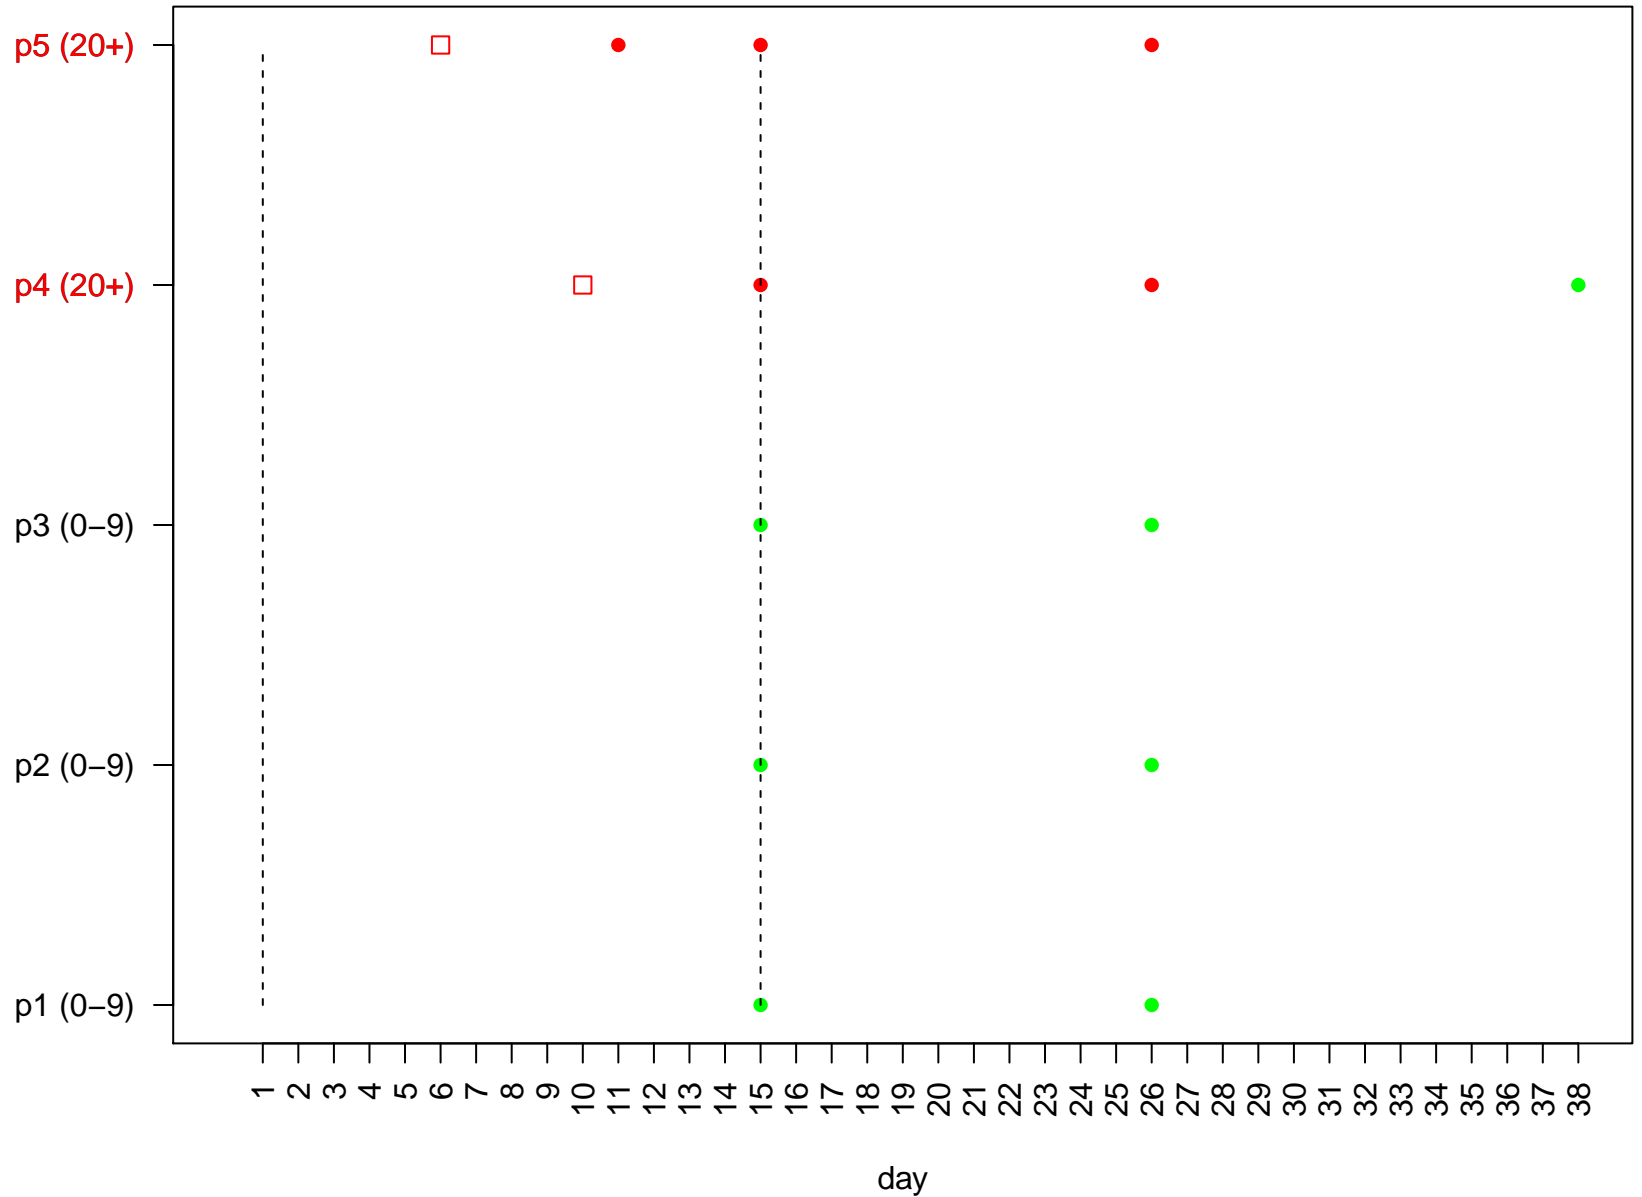

# Household 92

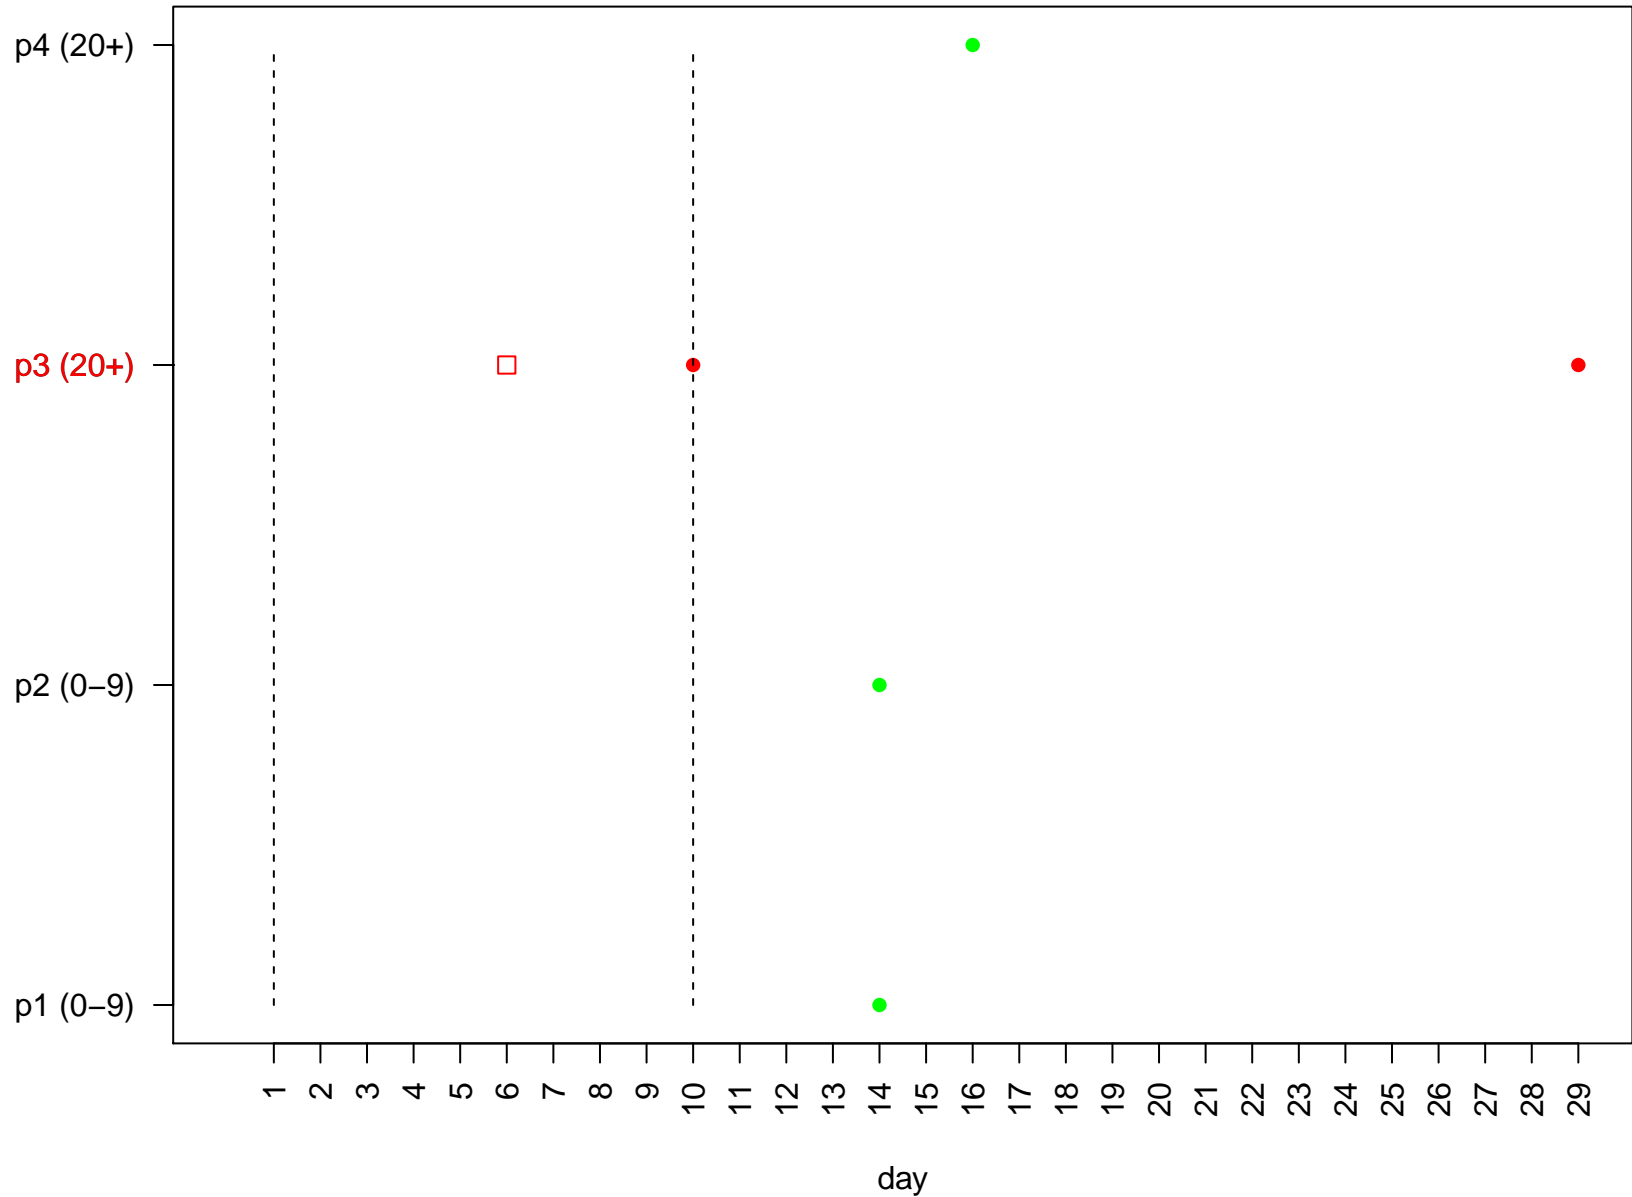



# Household 93

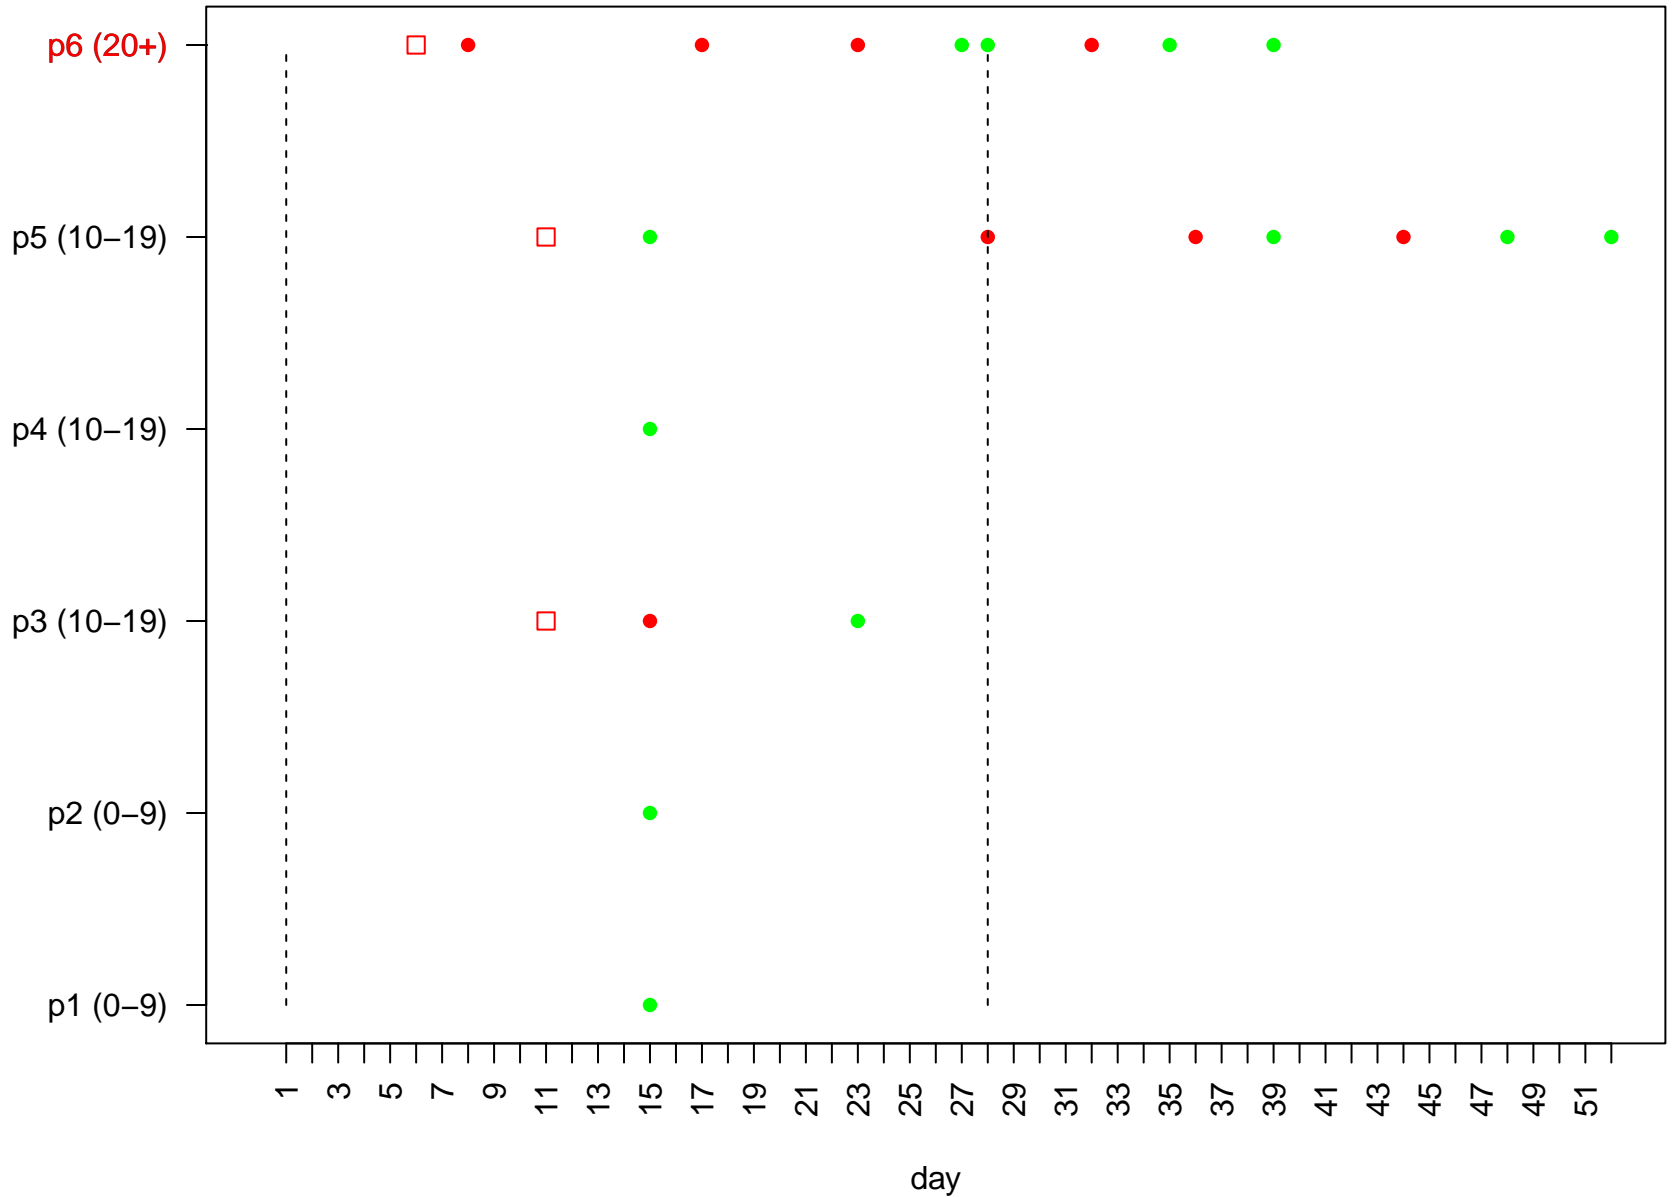



# Household 96

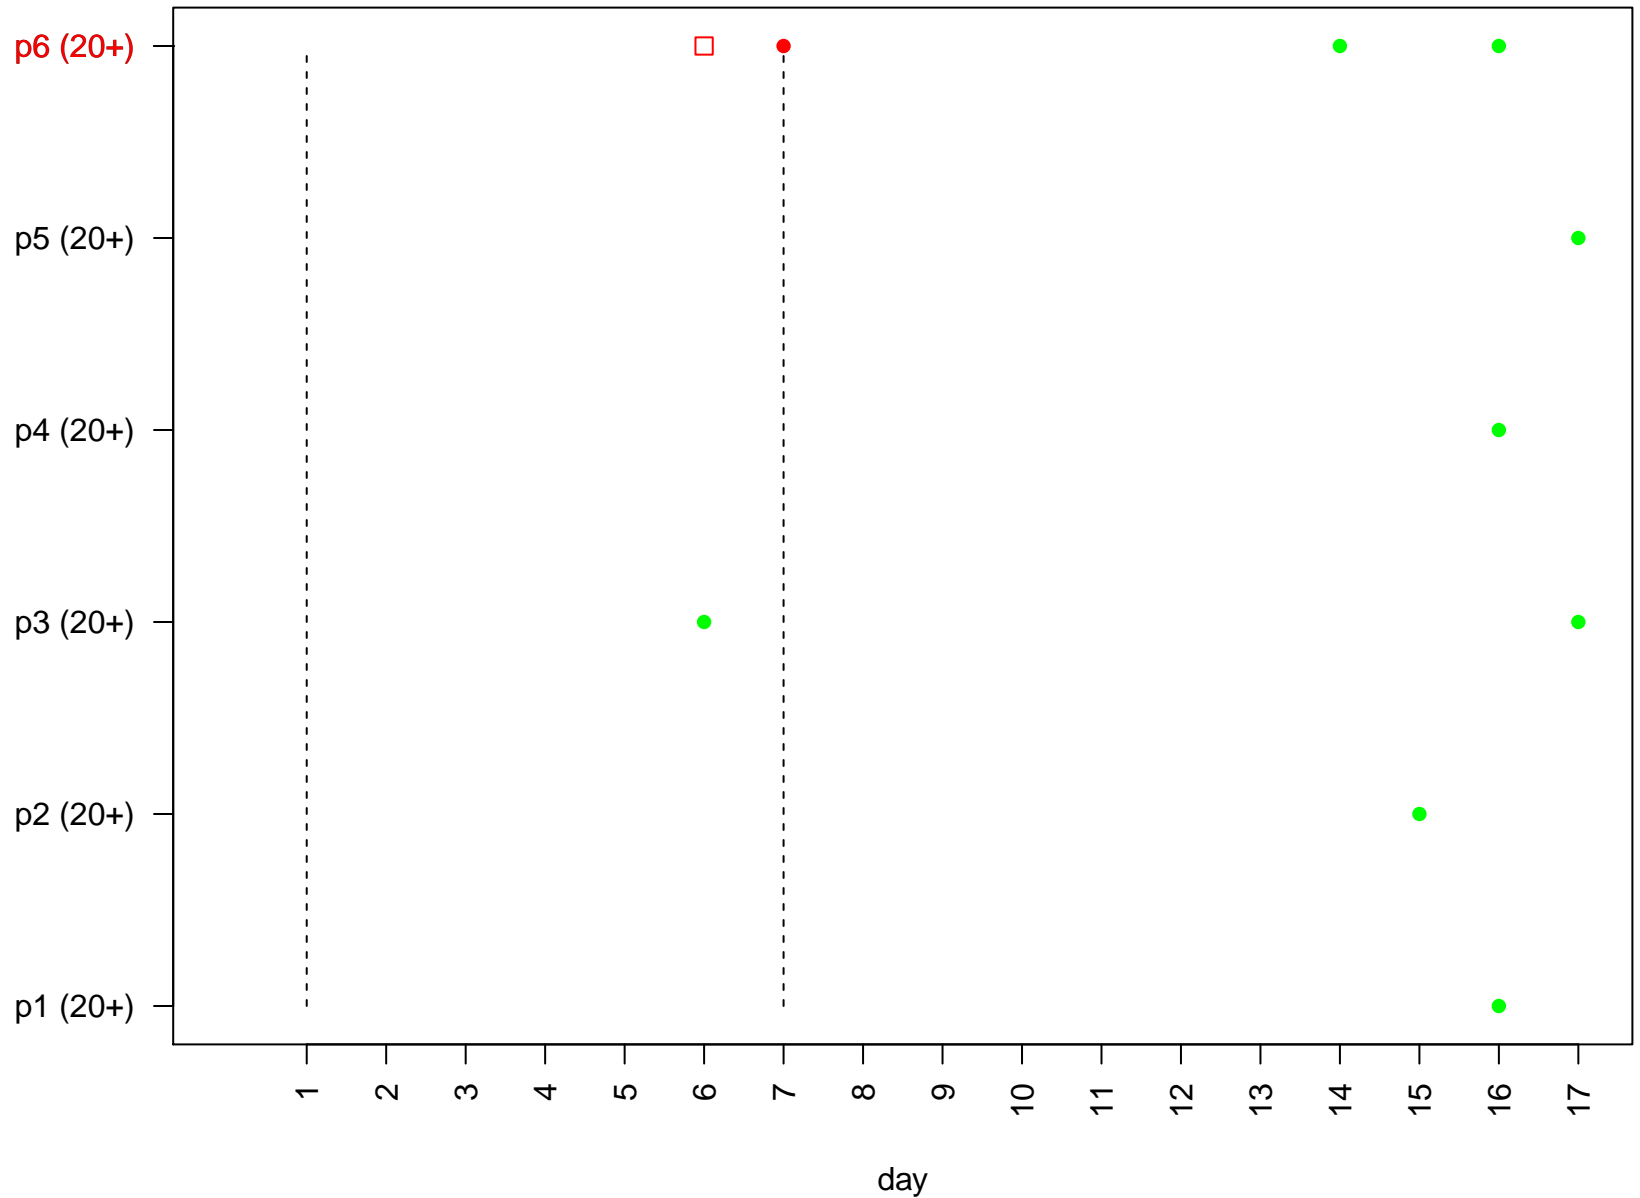

# Household 97

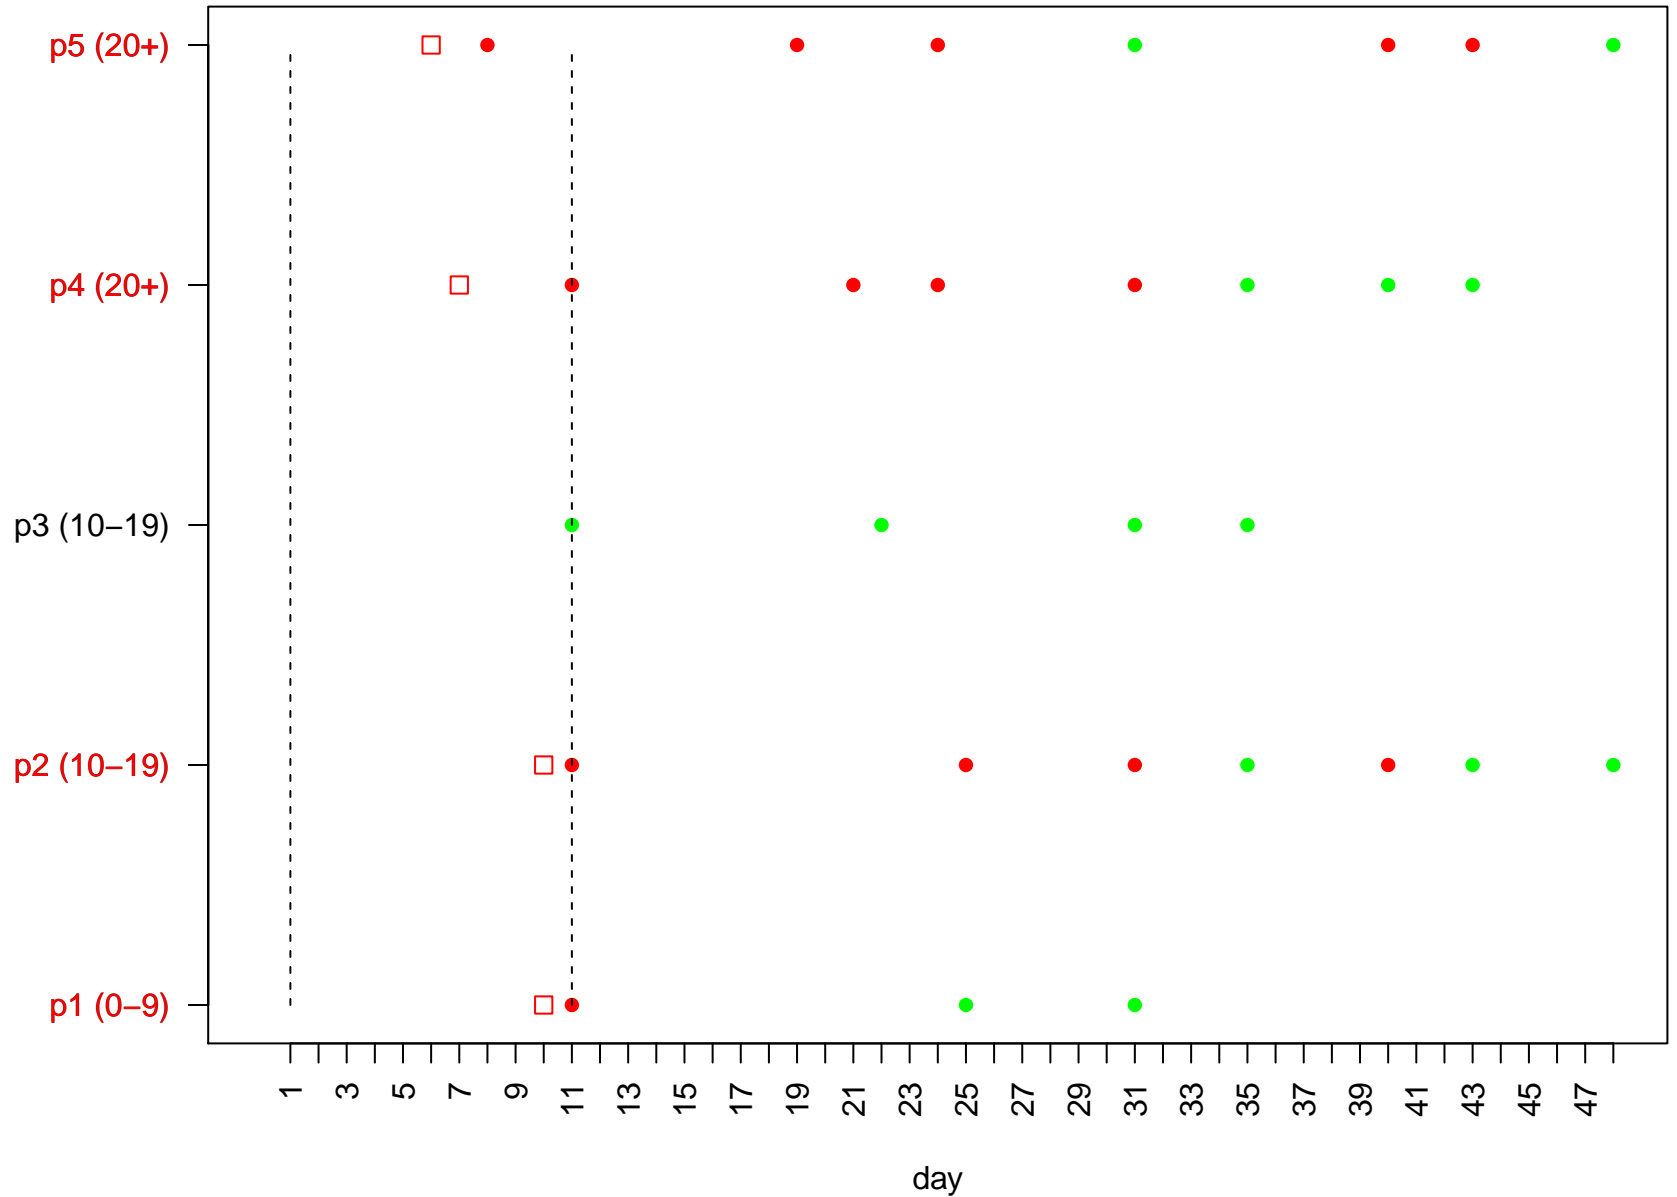

# Household 98

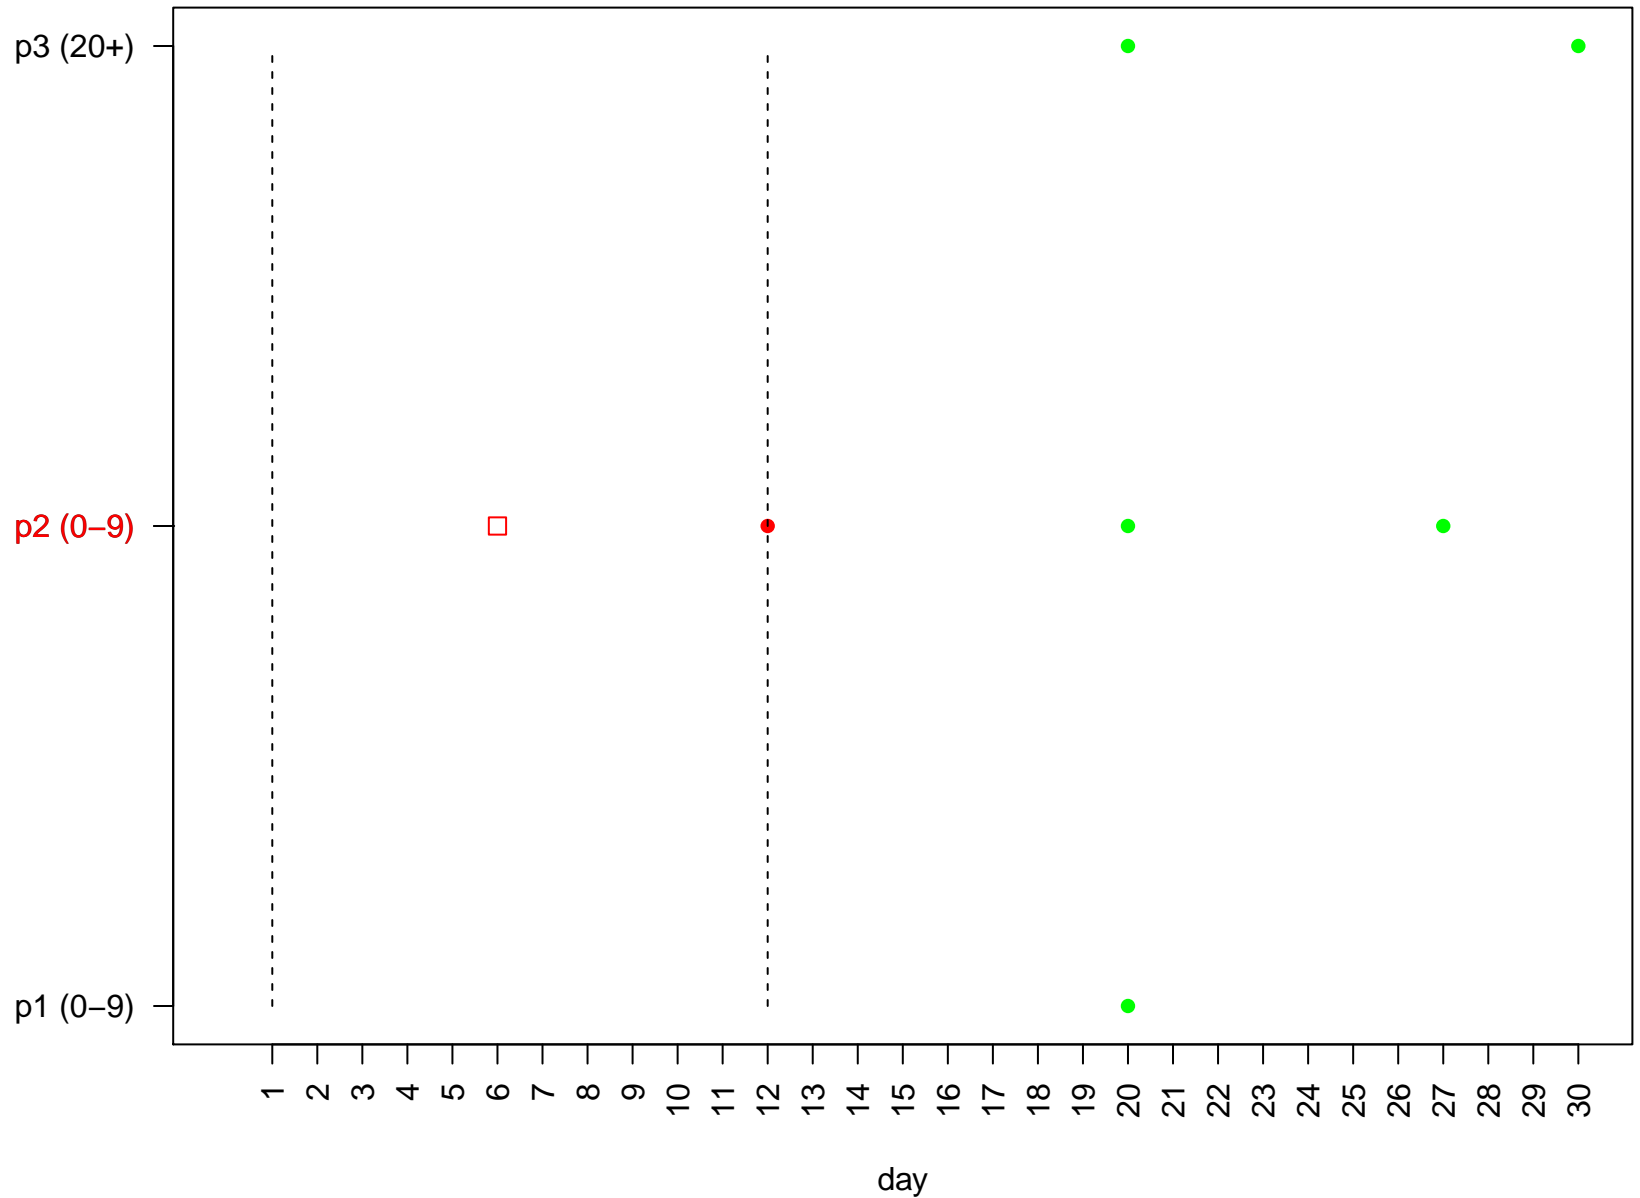

# Household 99

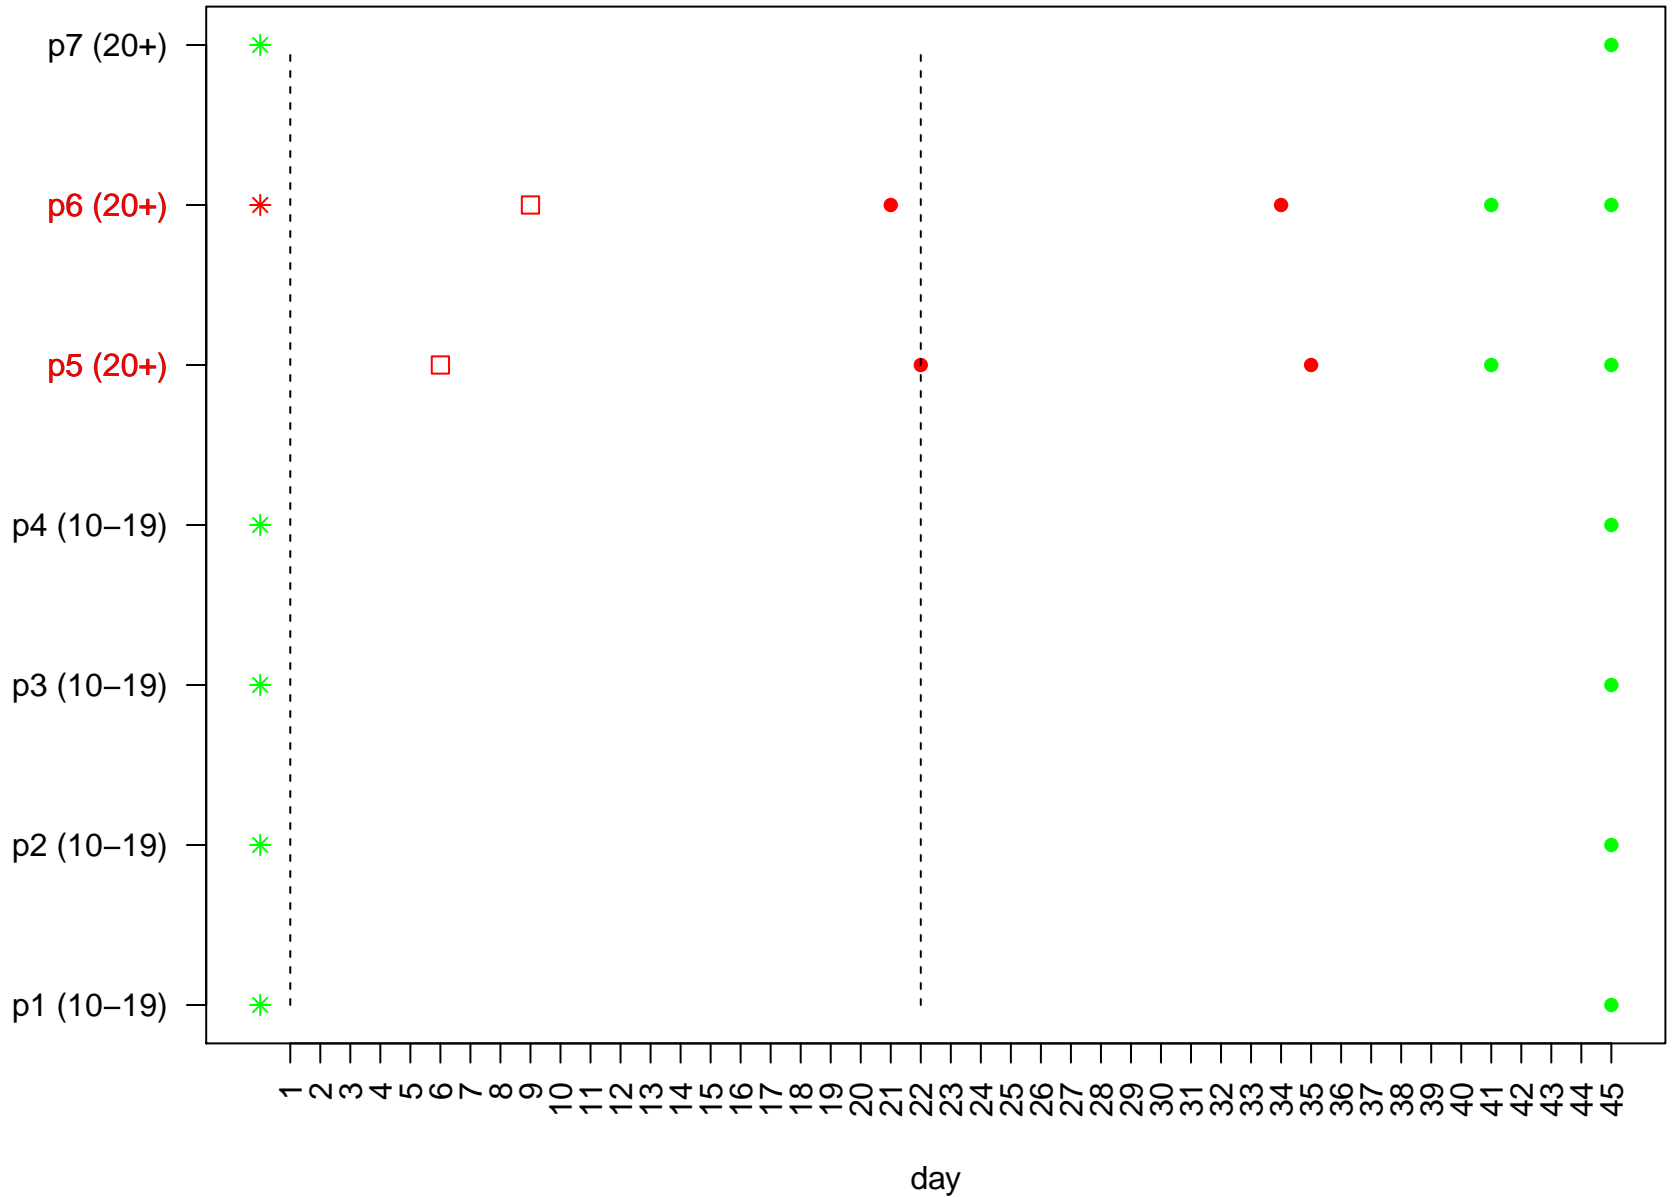

# Household 100

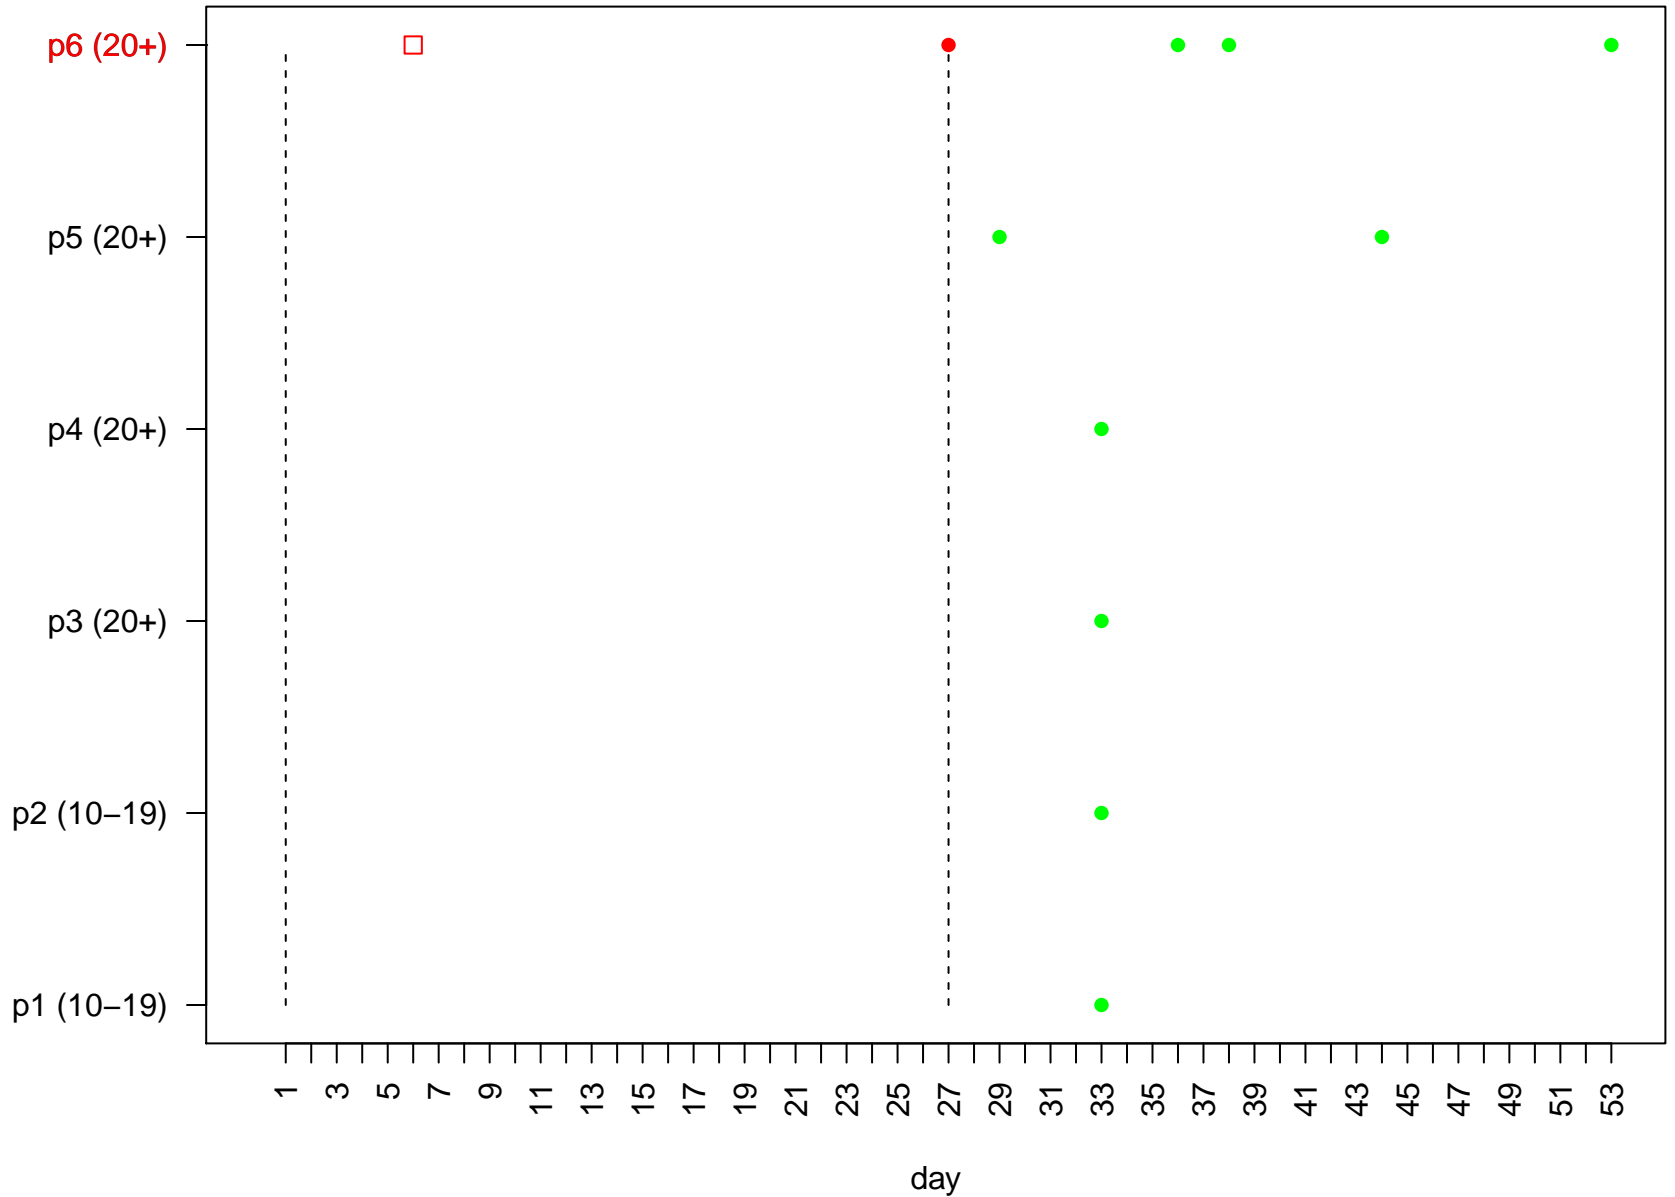

# Household 101

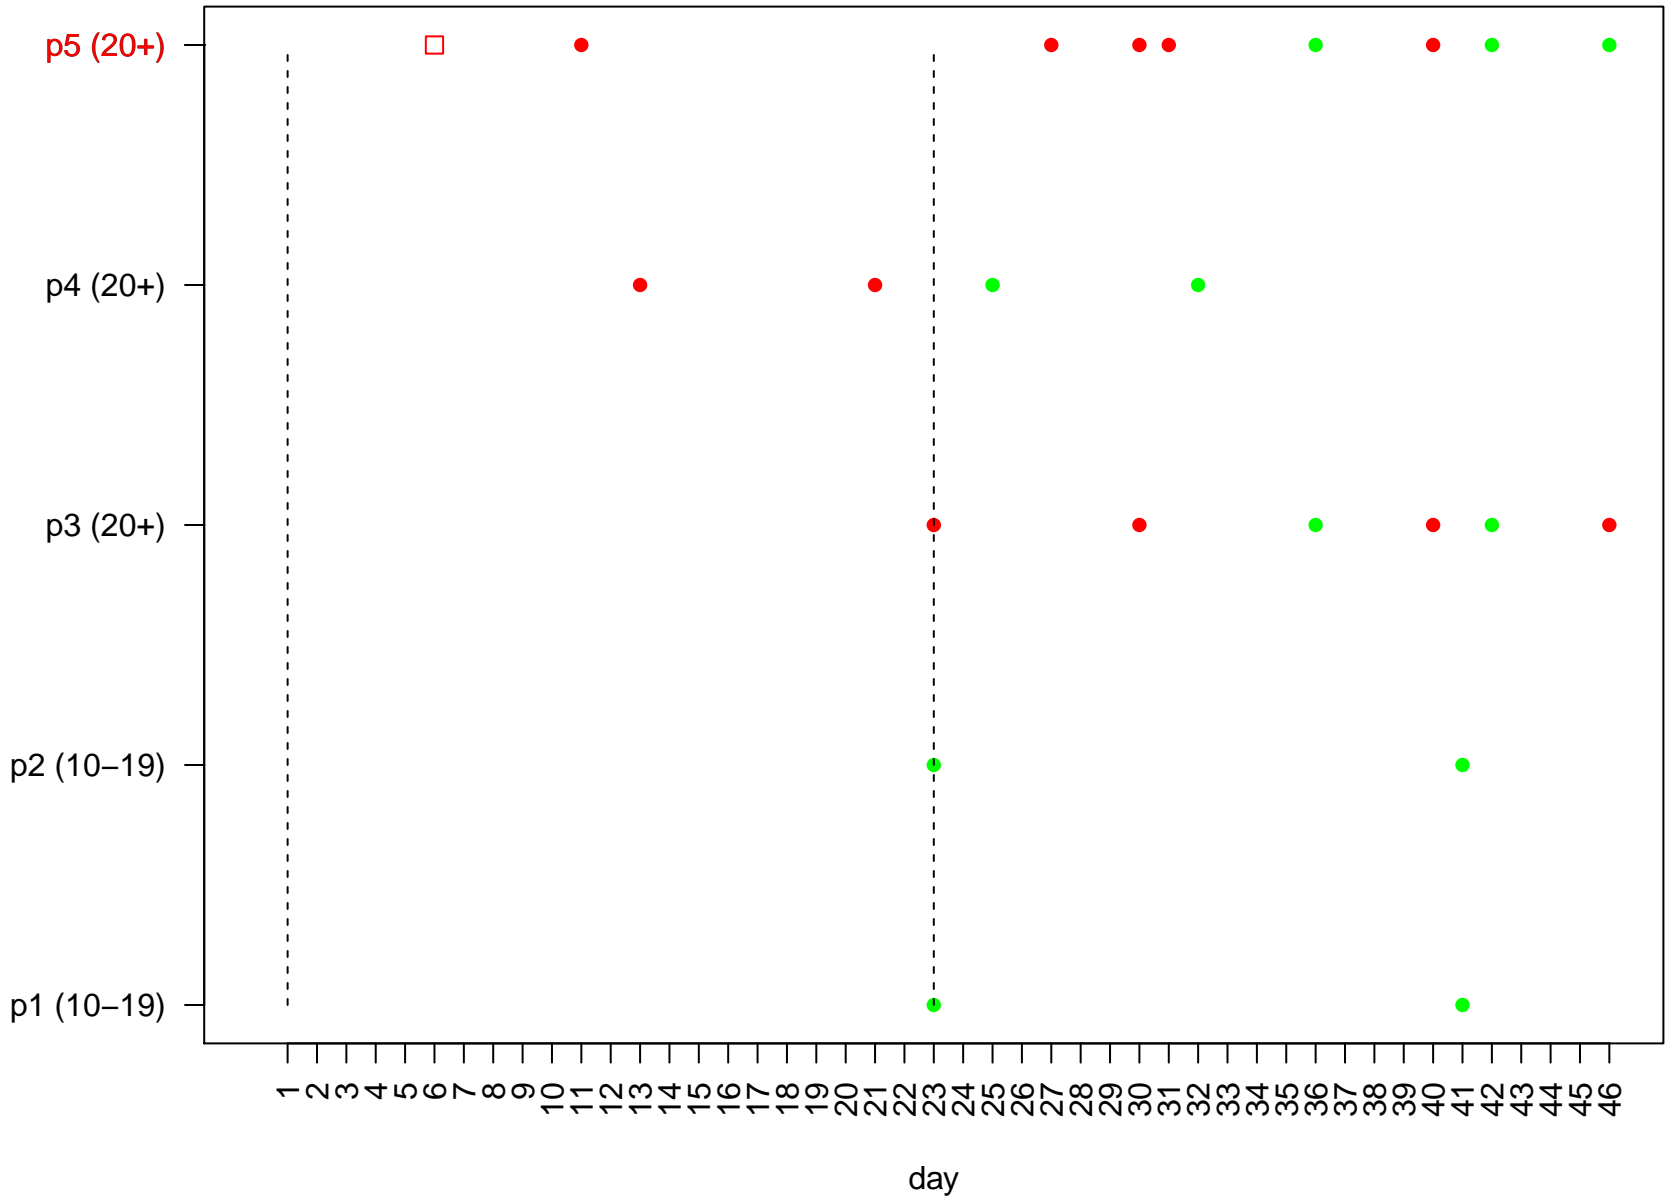



# Household 102

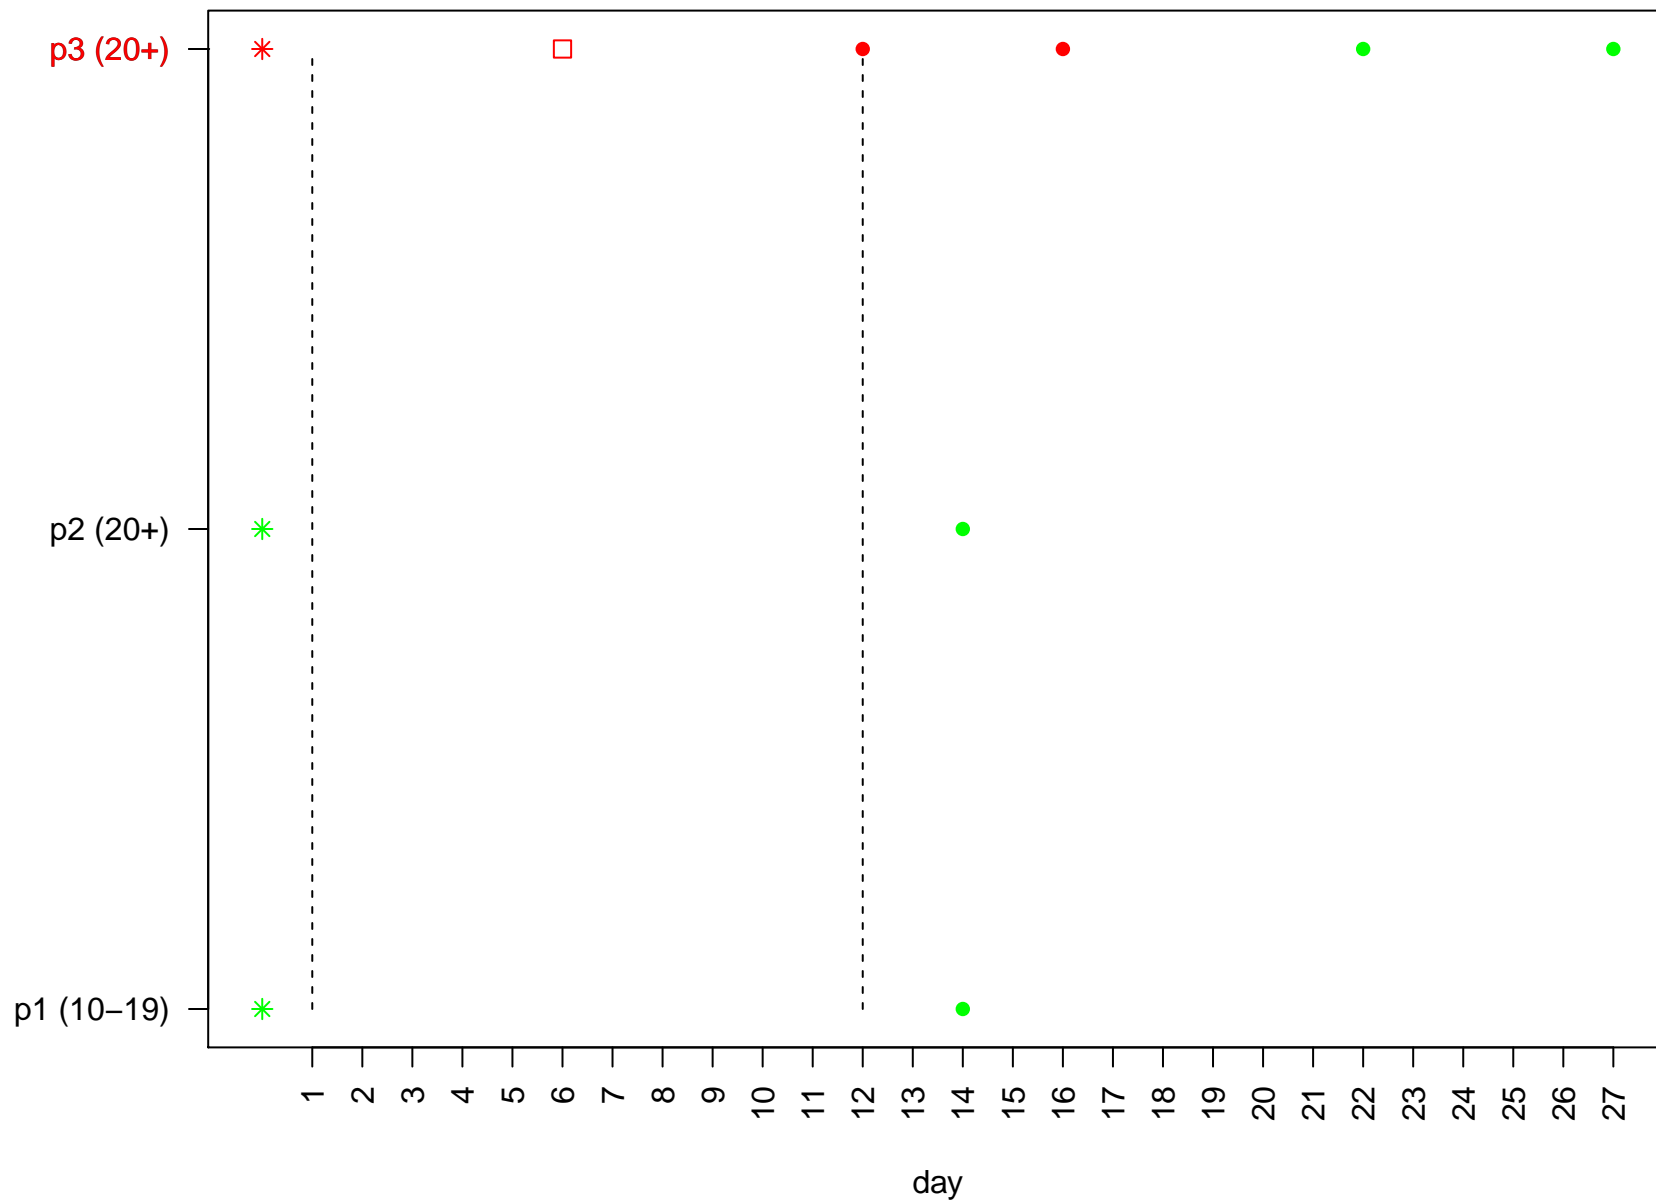

# Household 103

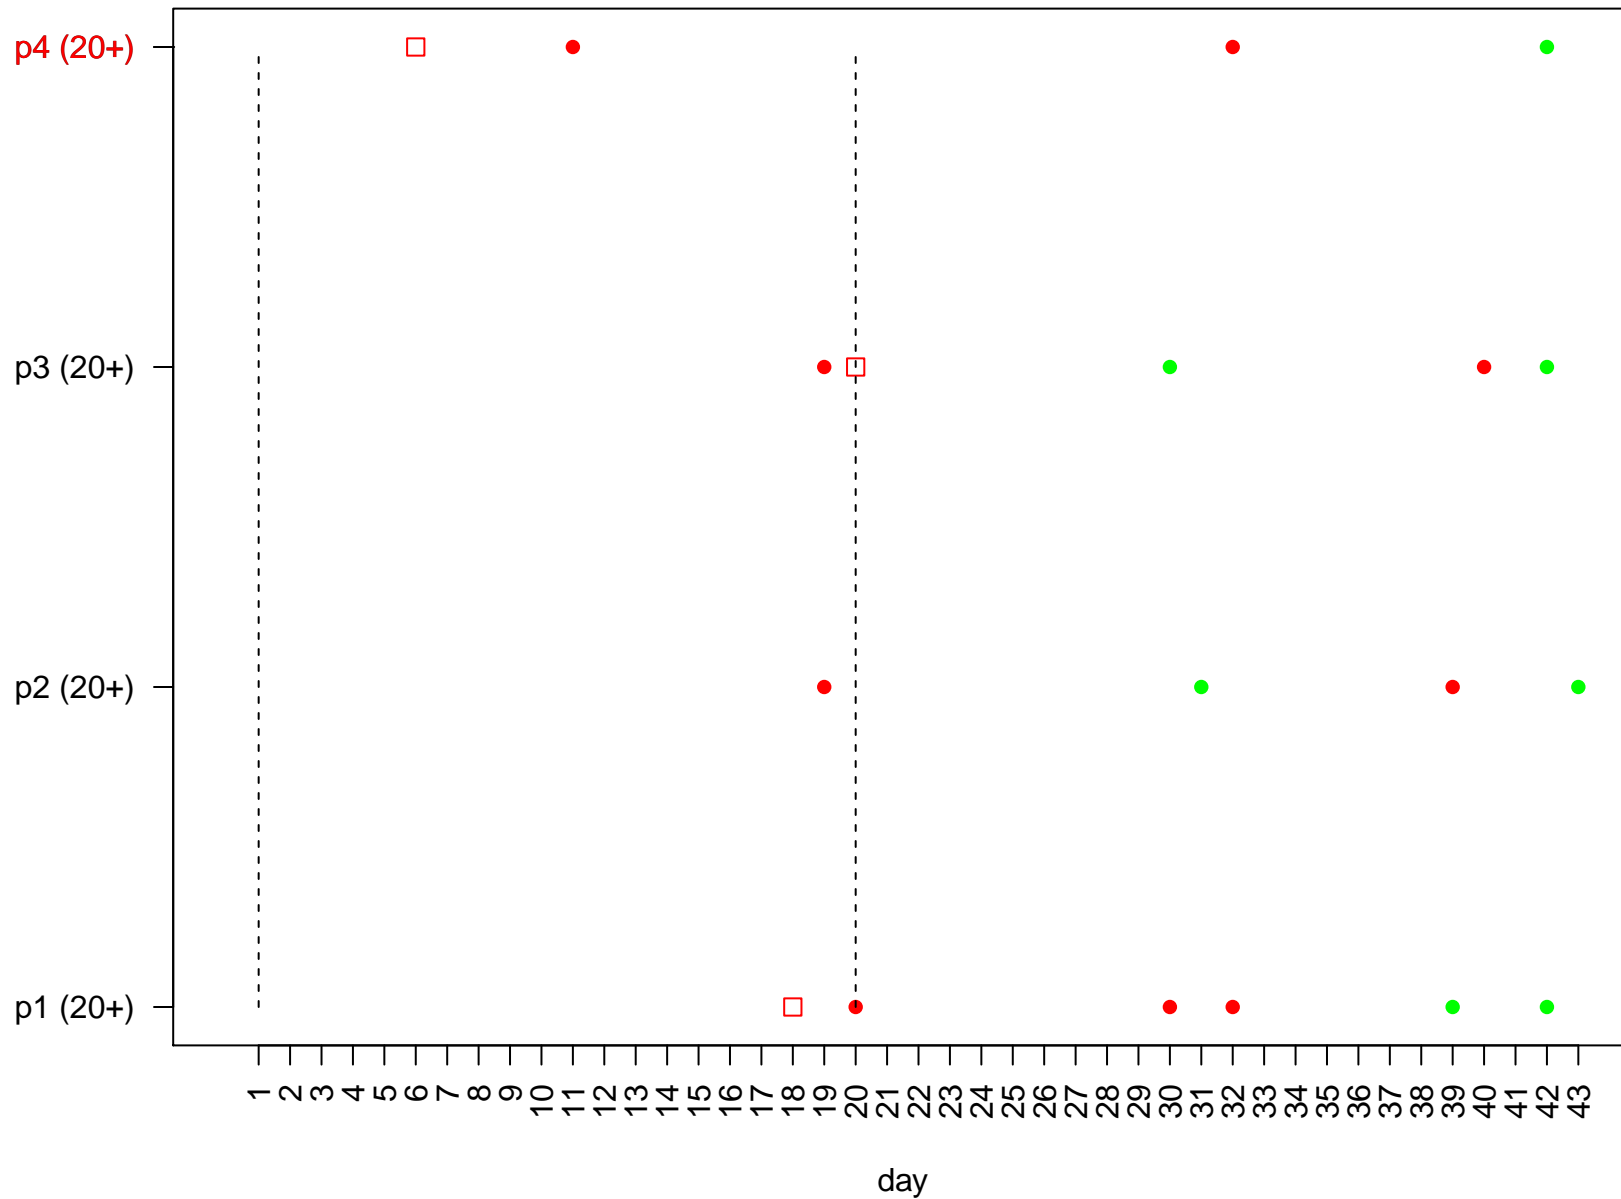

# Household 104

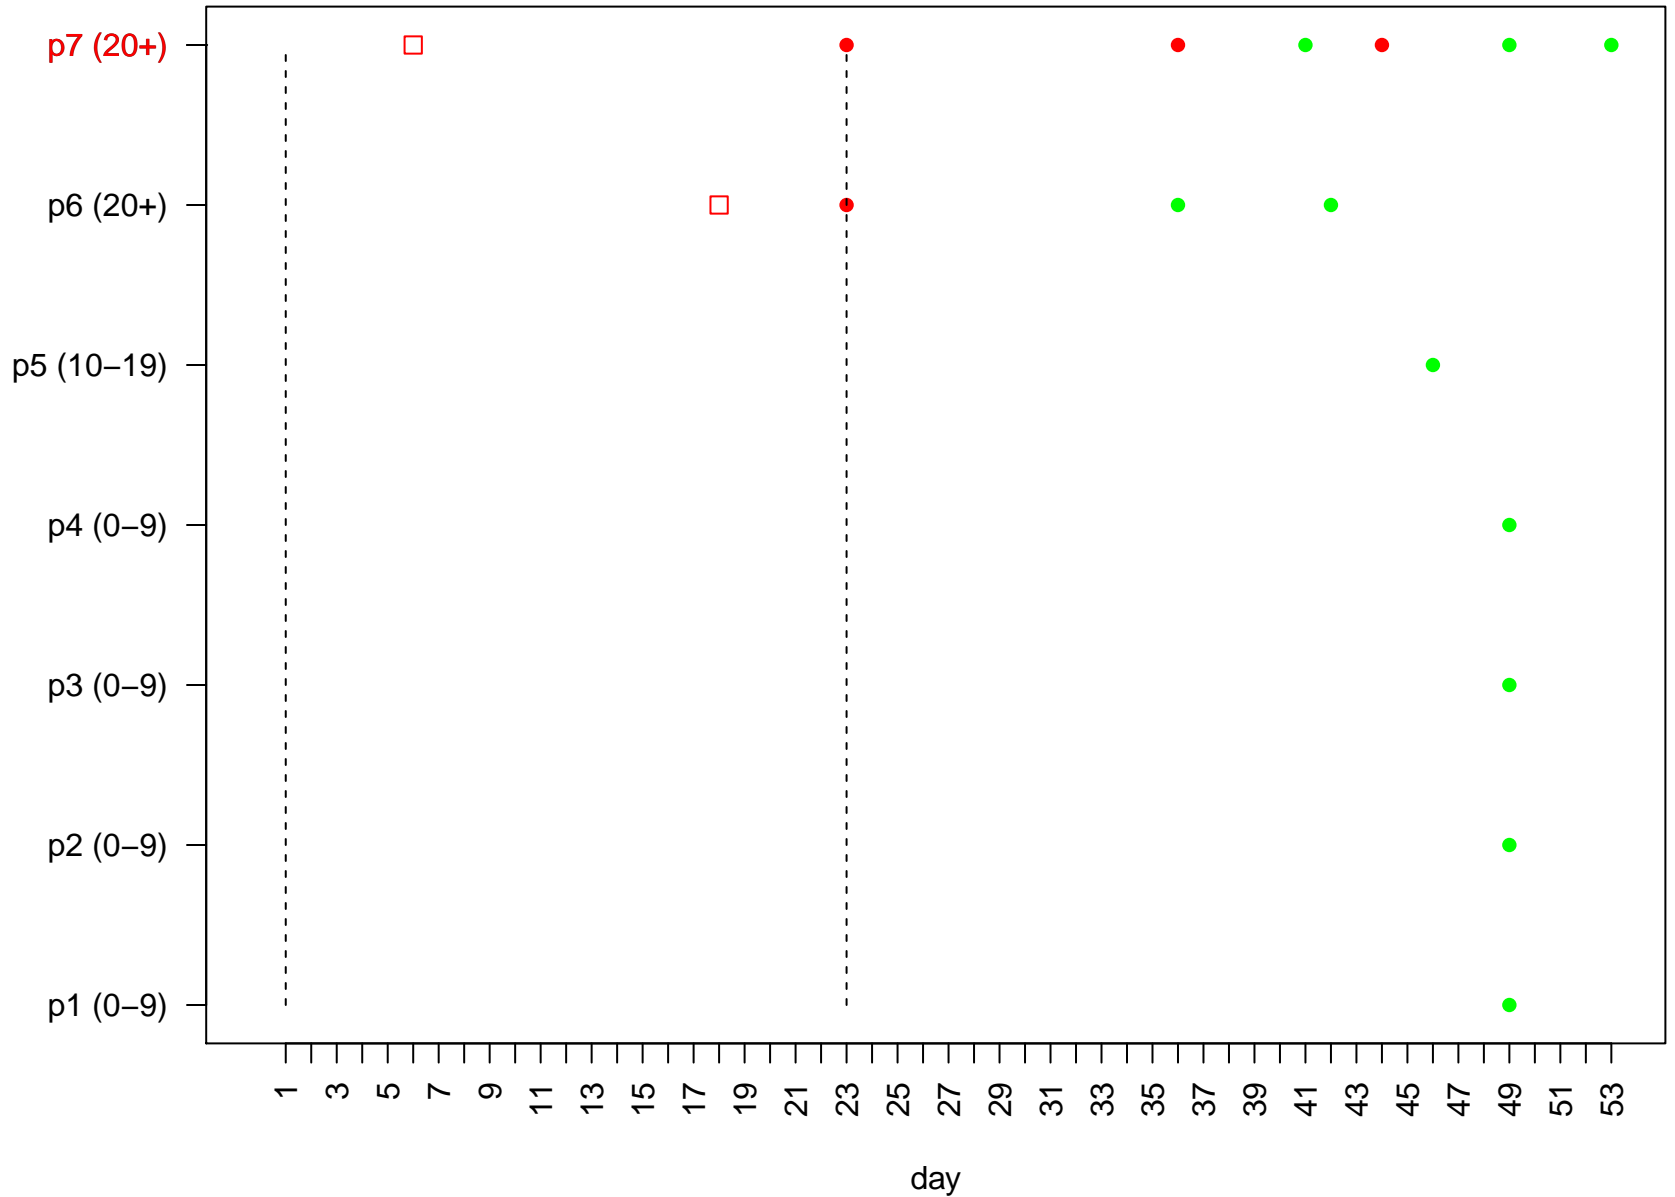

# Household 105

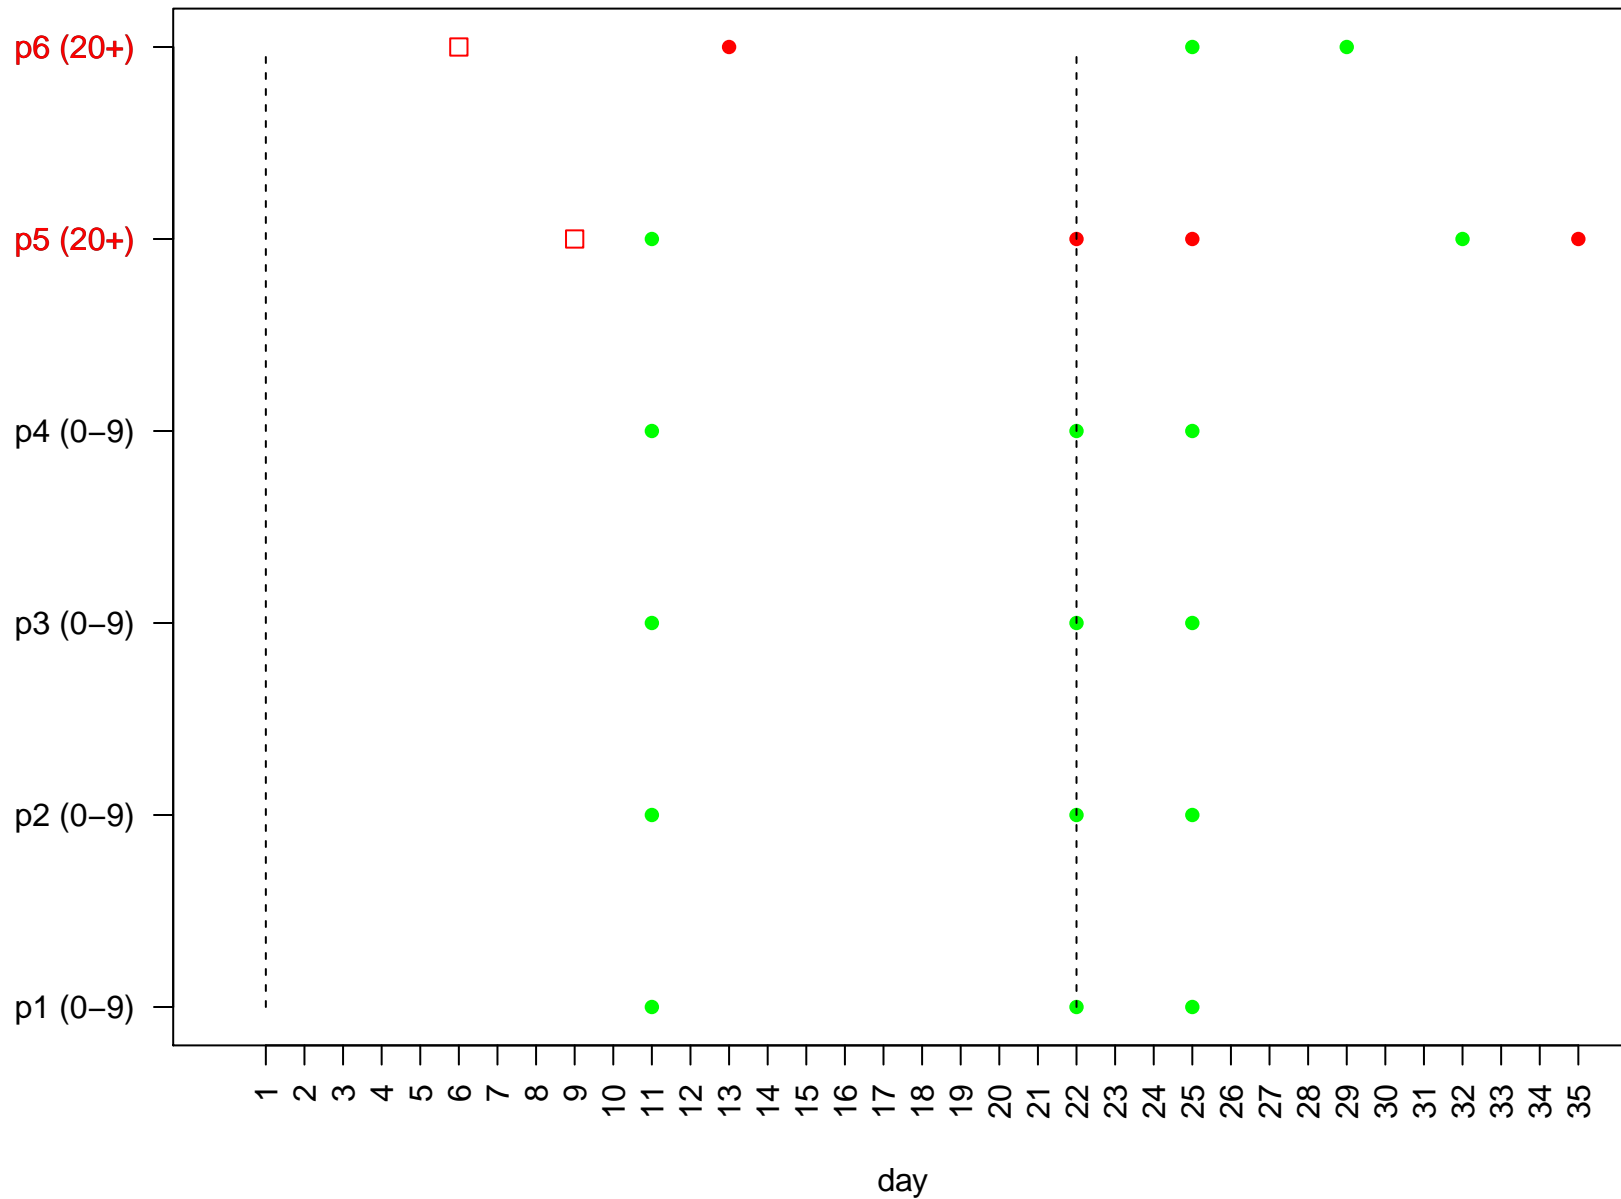

# Household 106

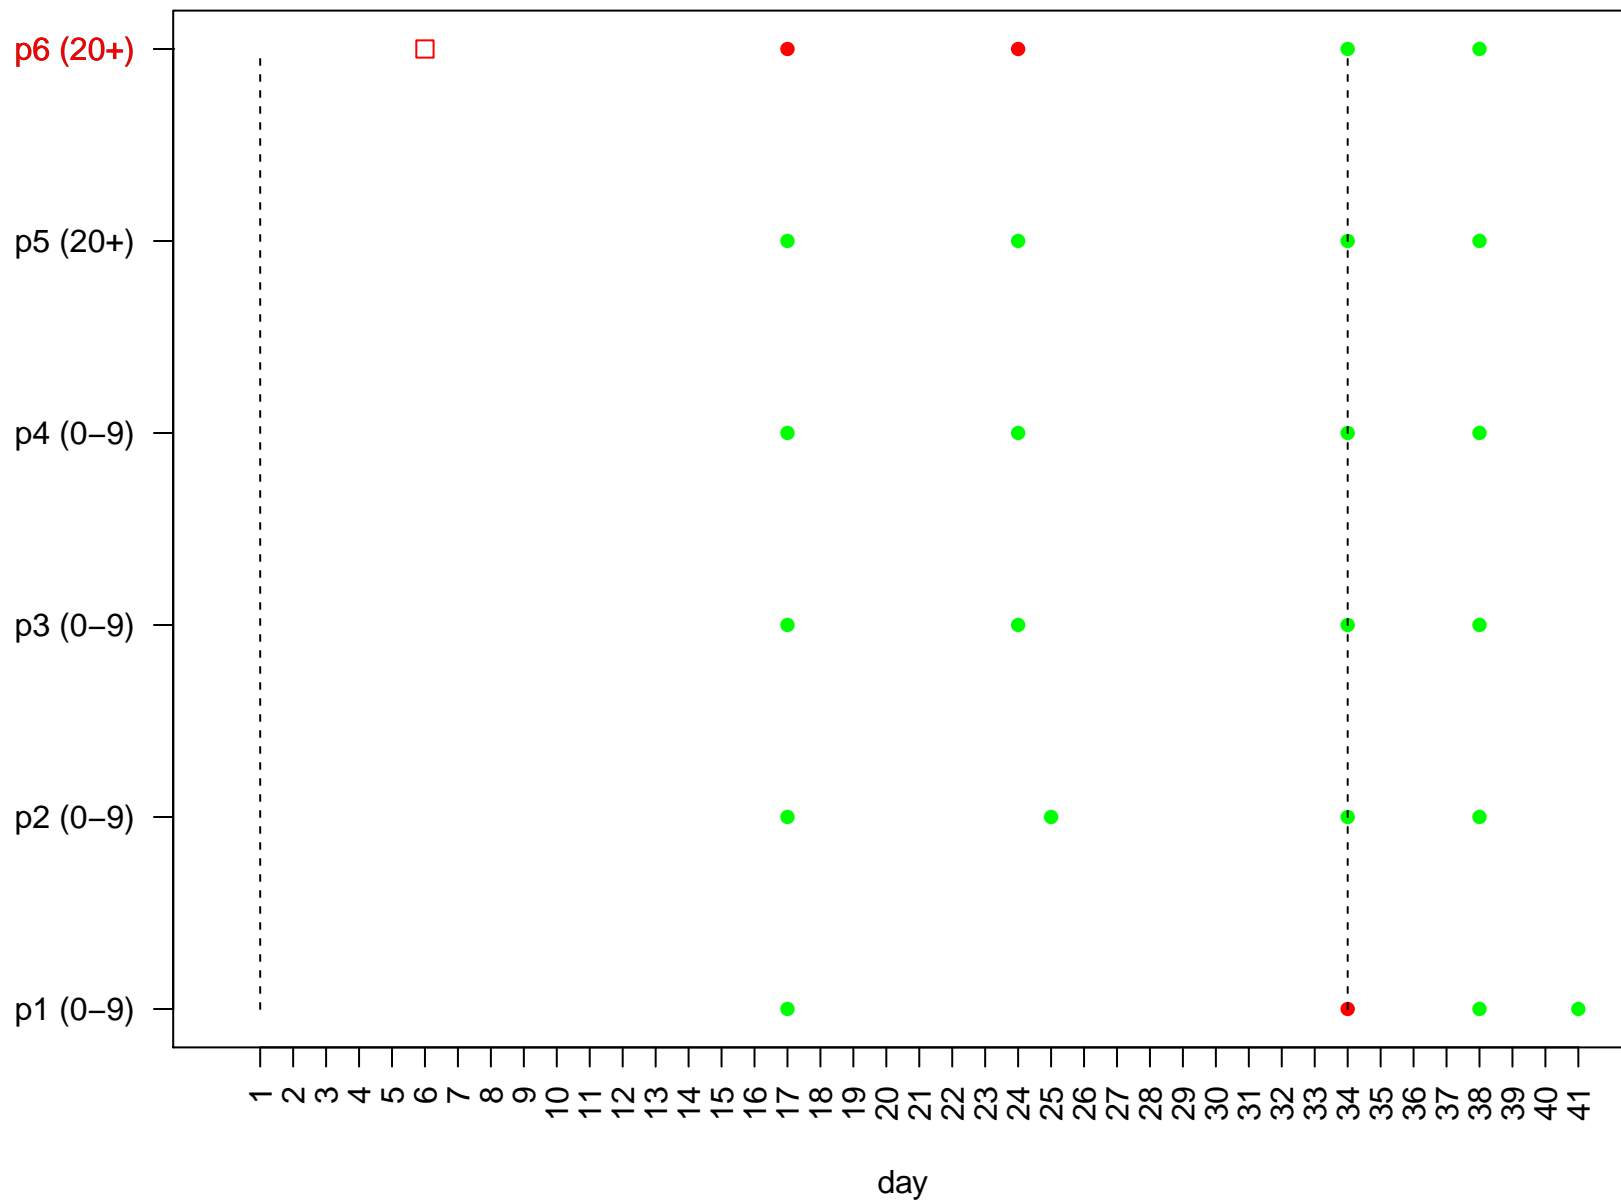

# Household 107

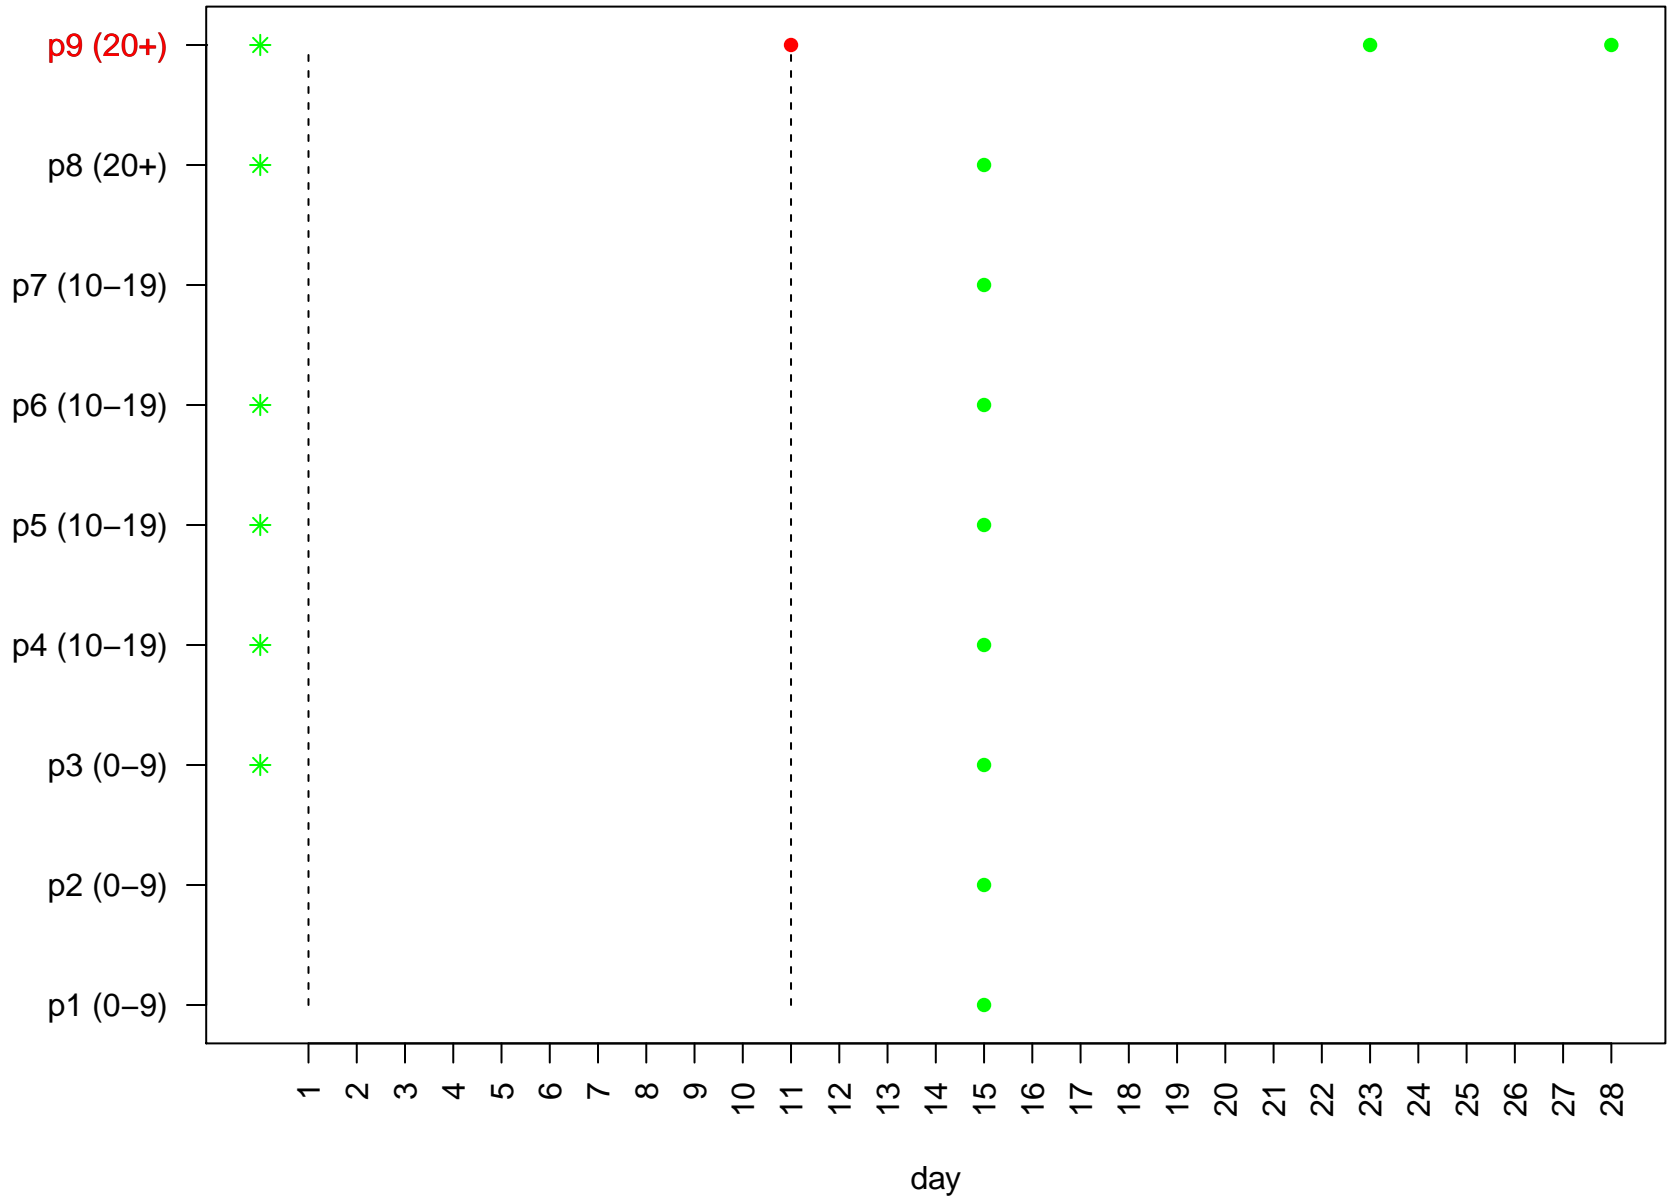

# Household 108

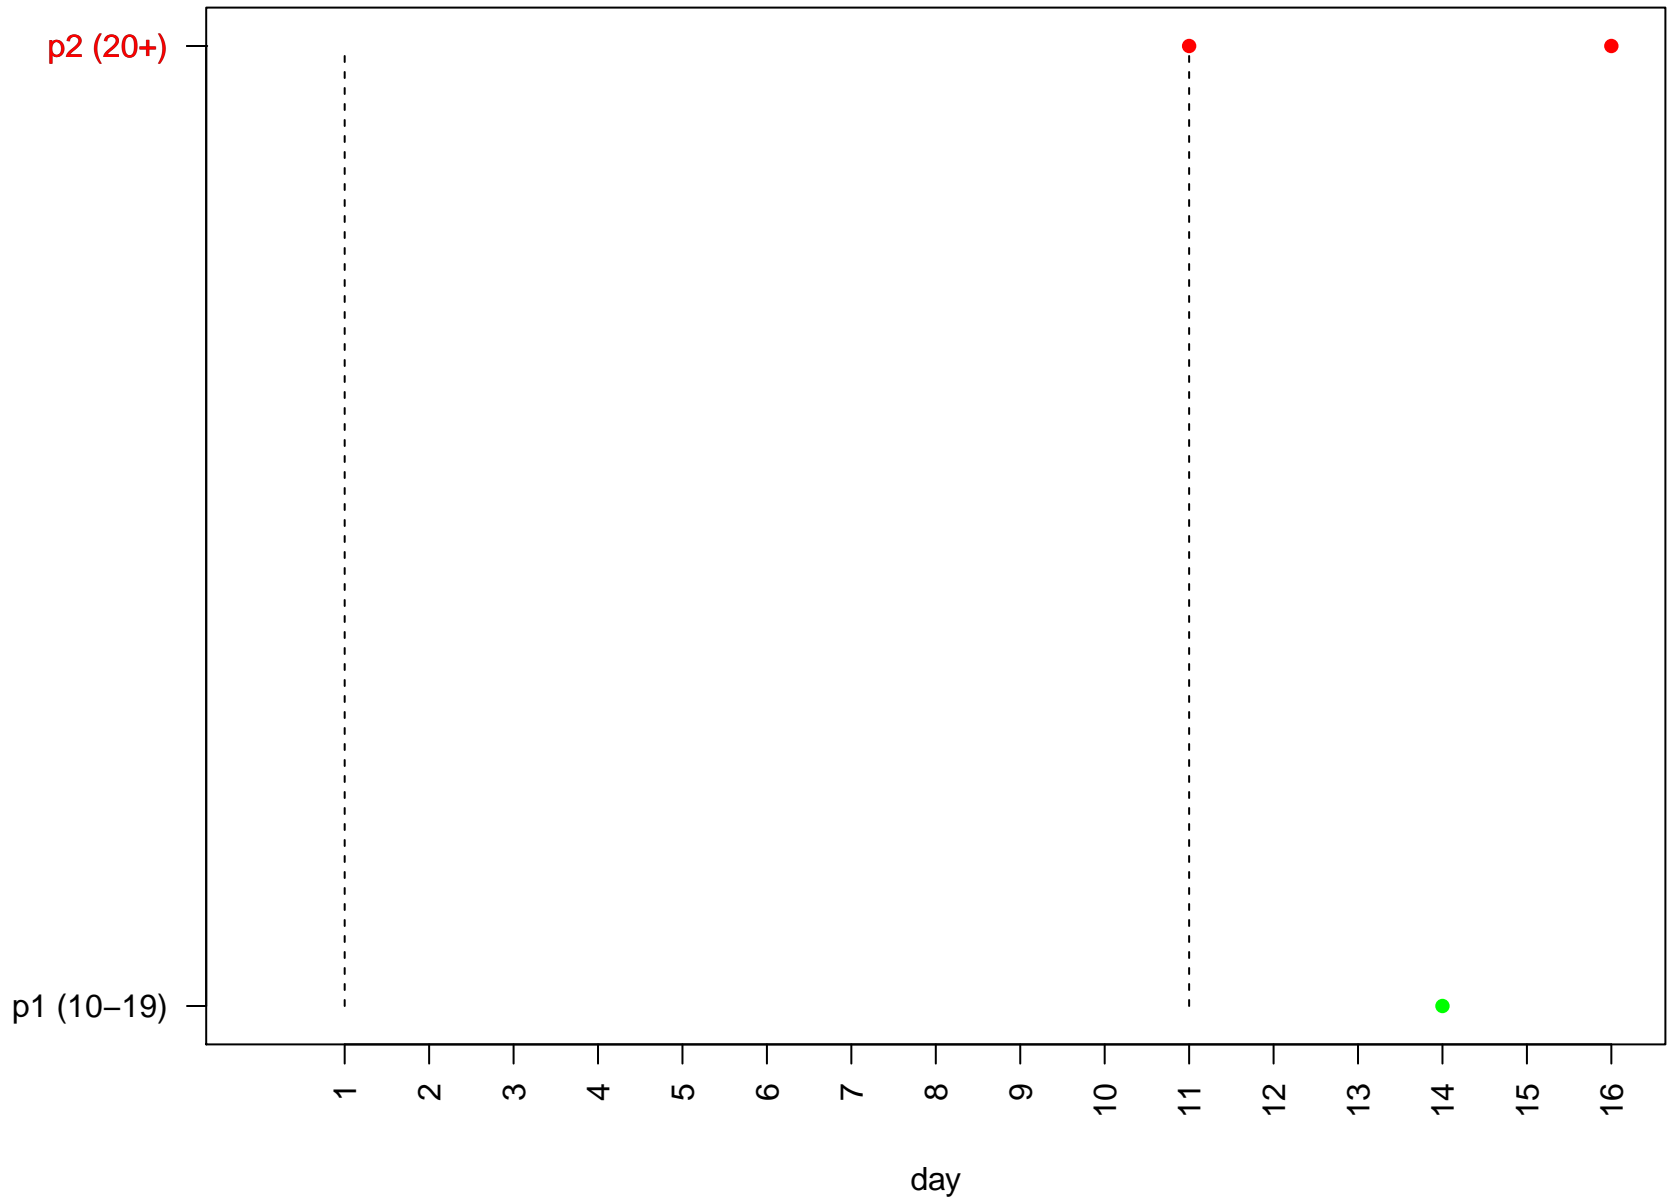

# Household 109

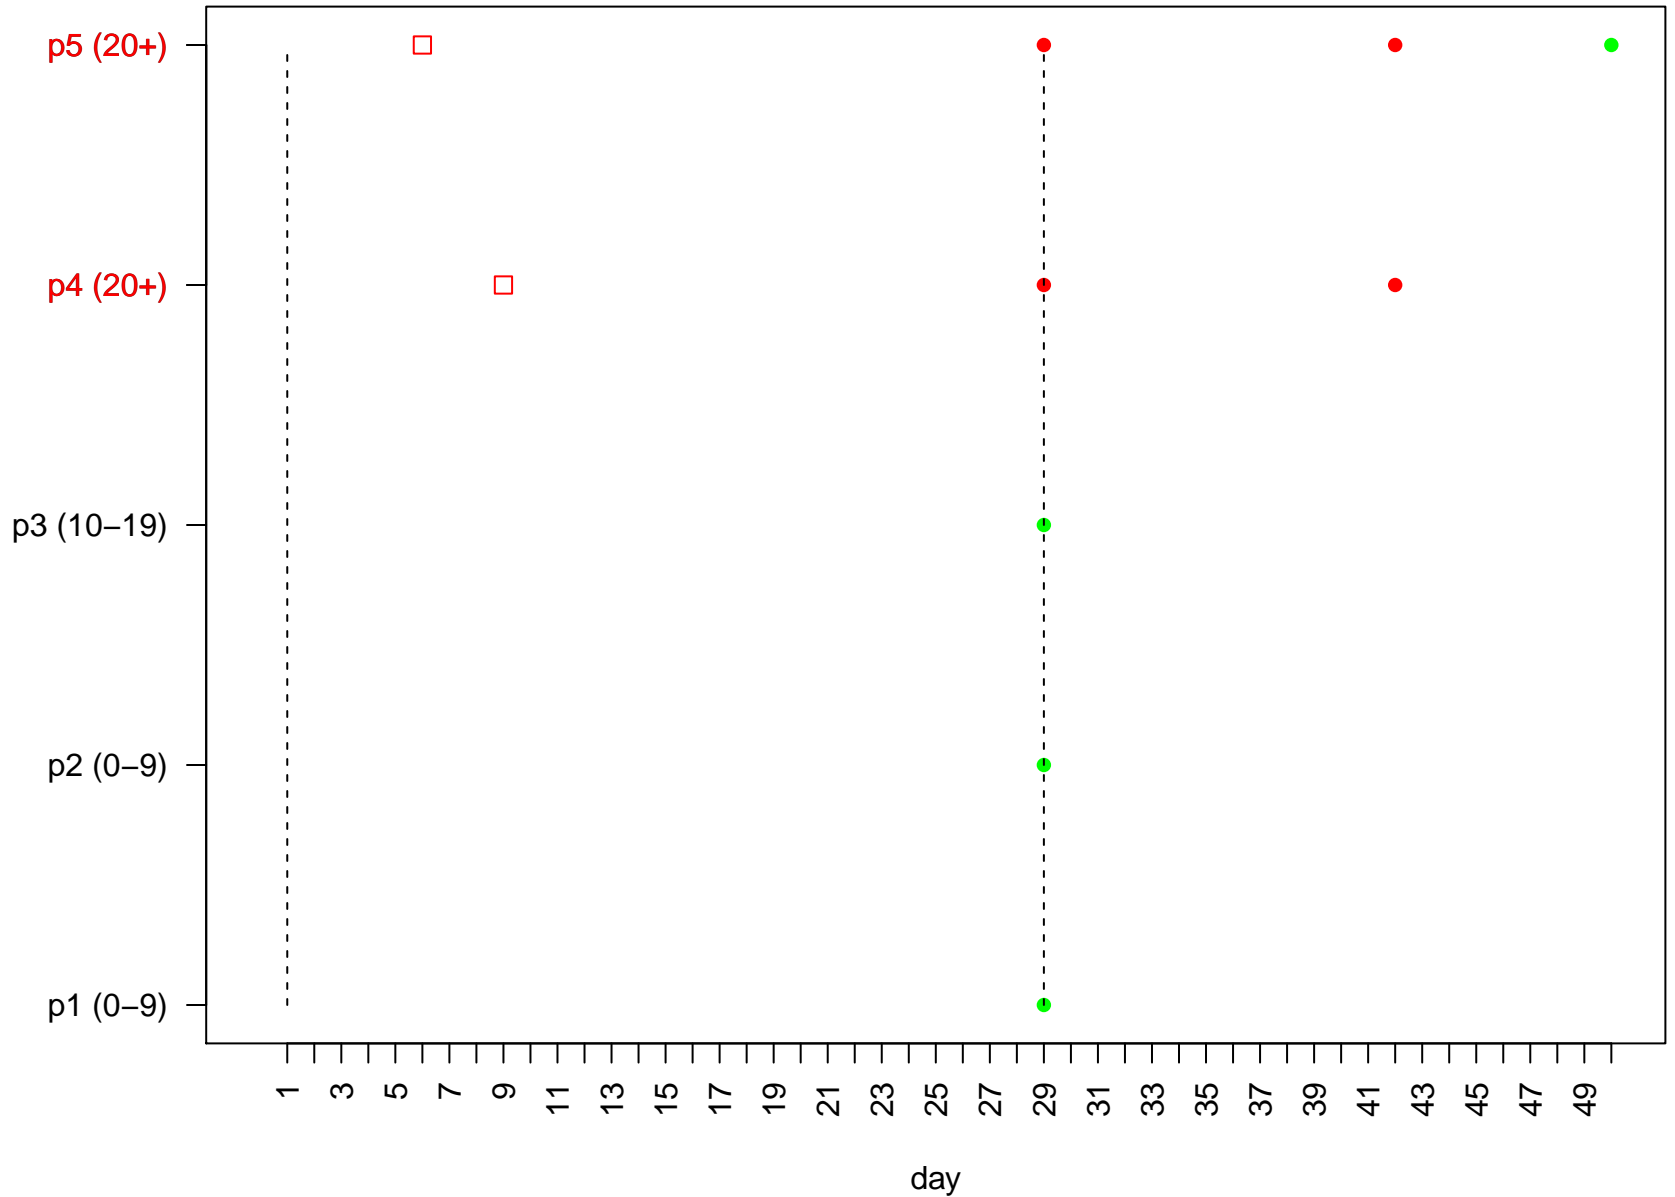



# Household 110

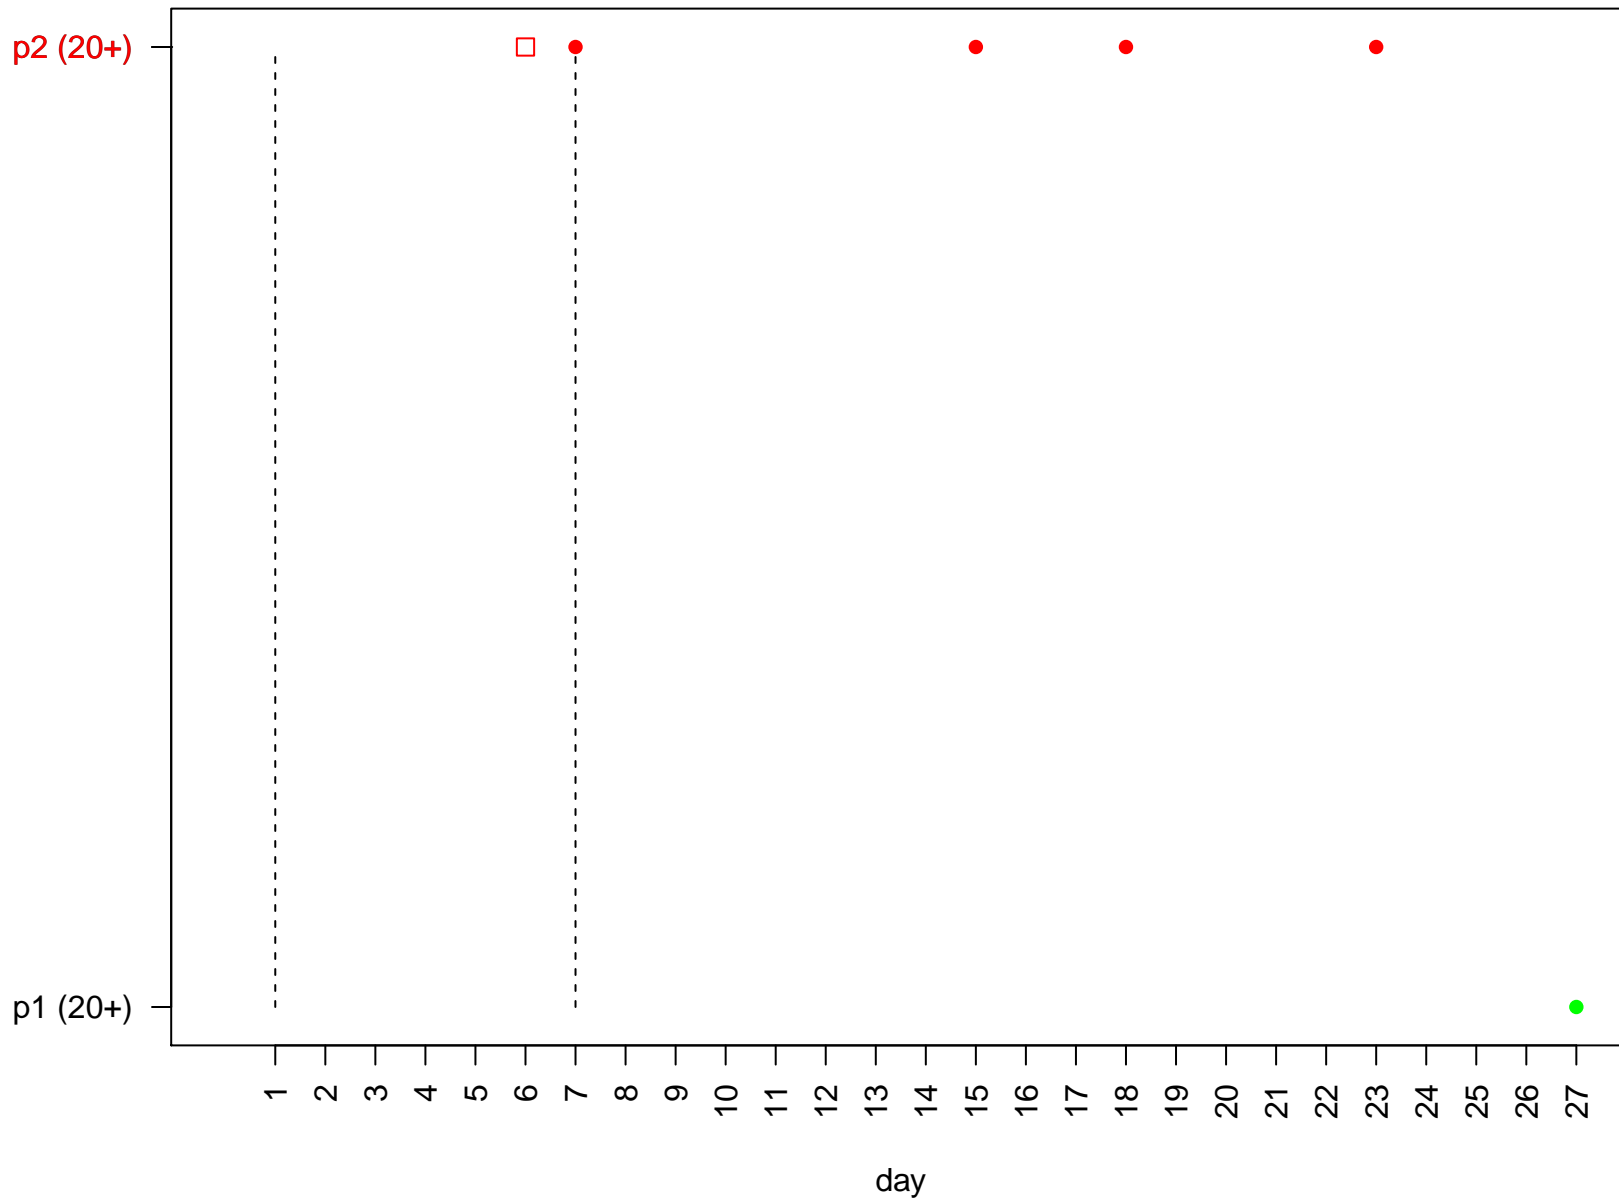

# Household 111

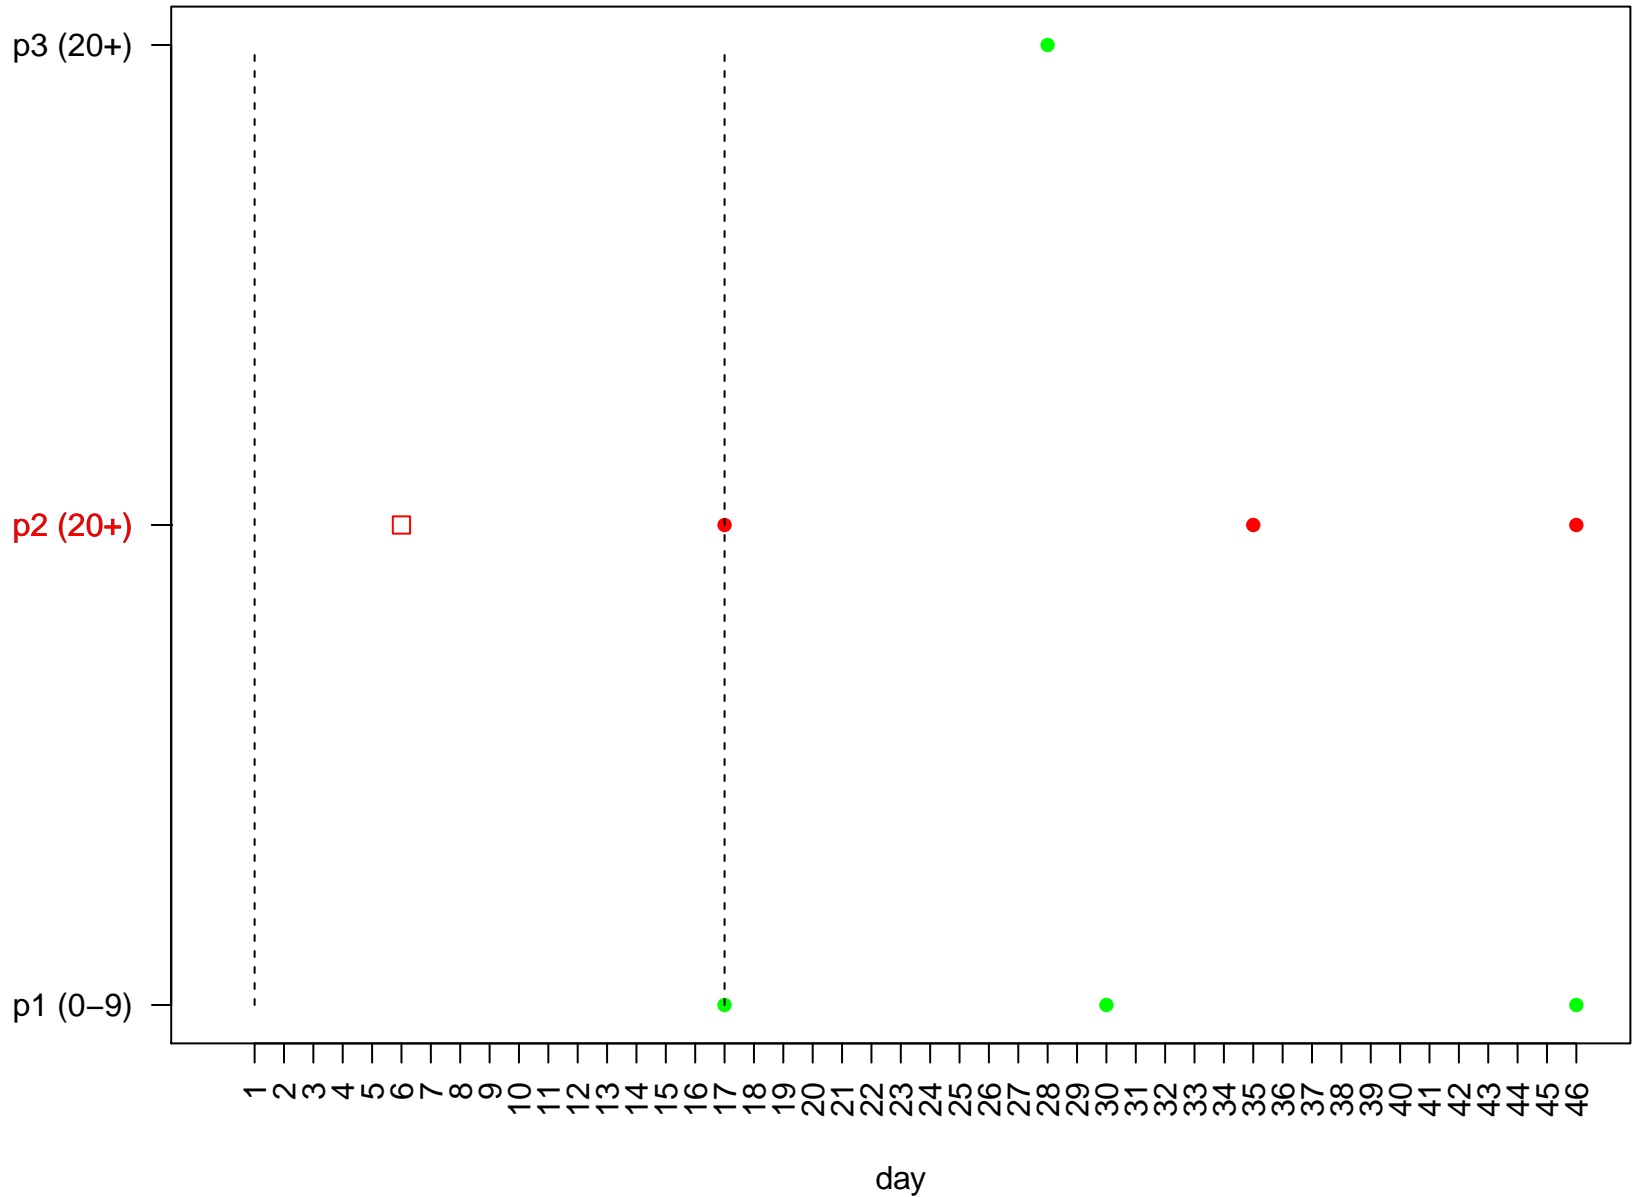

# Household 112

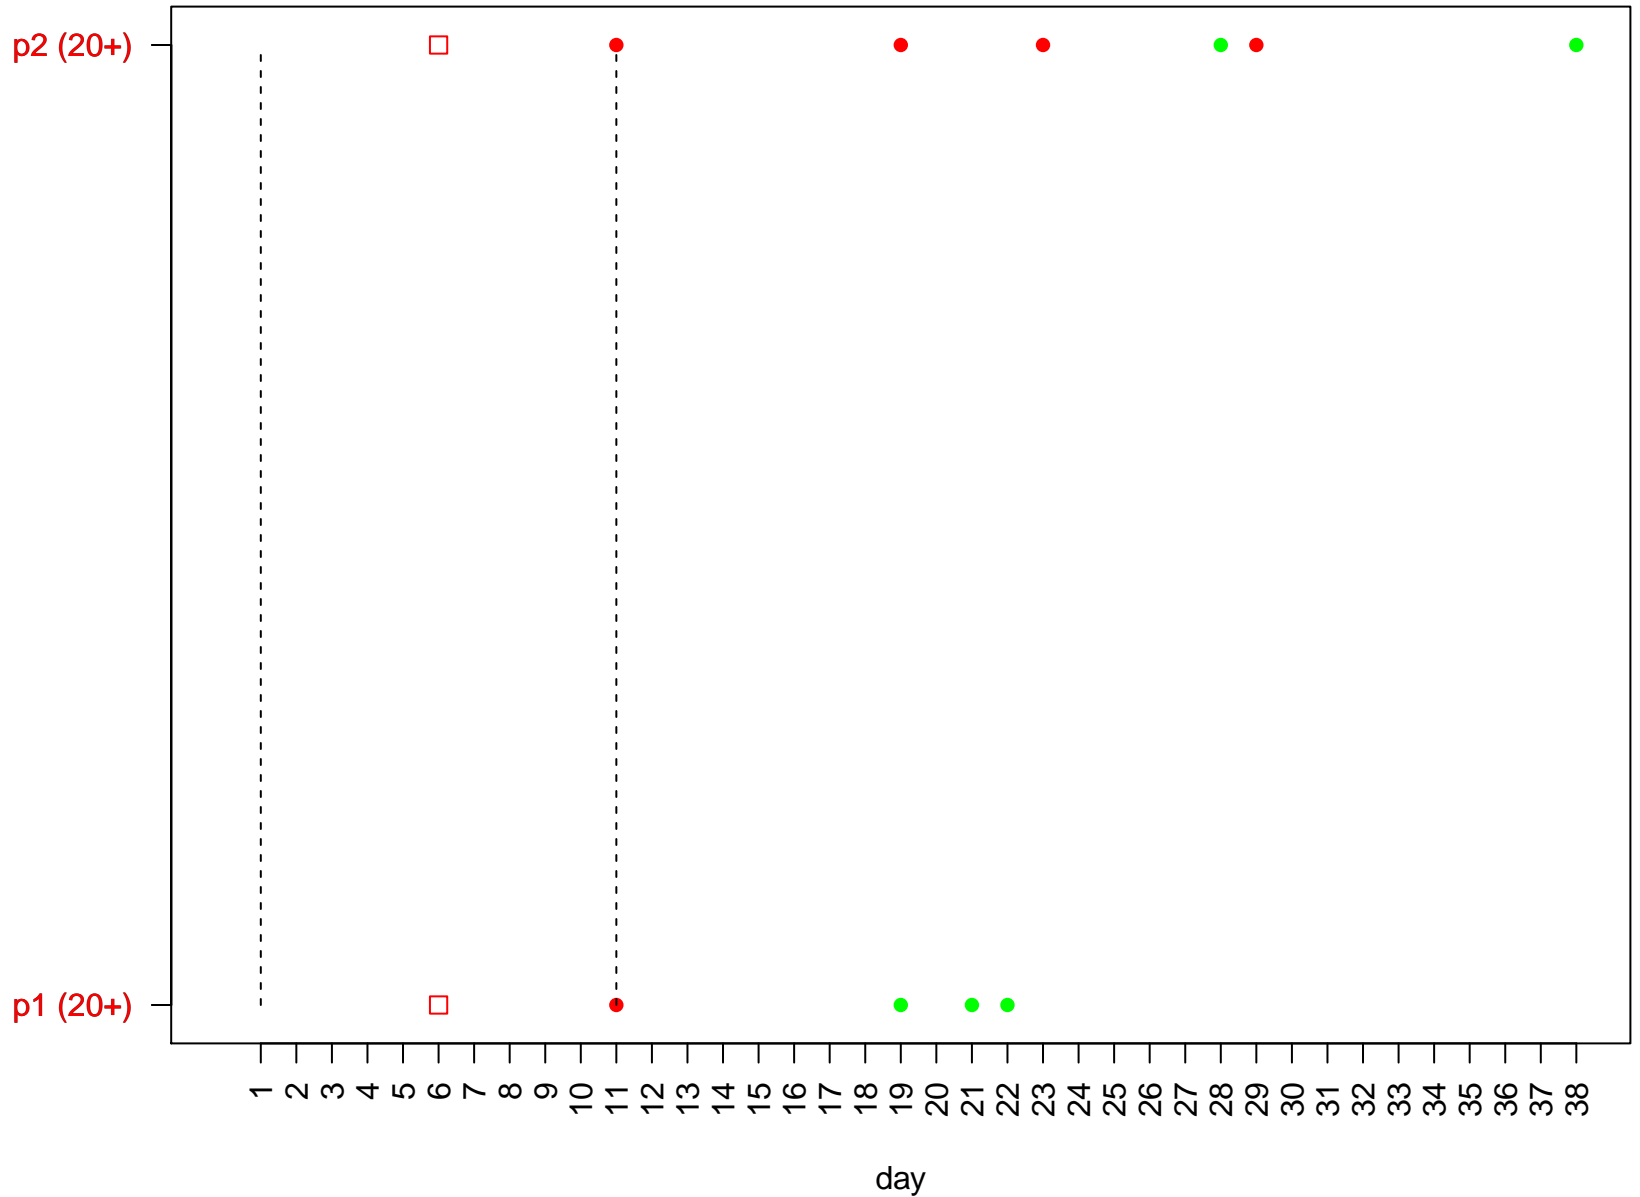

# Household 113

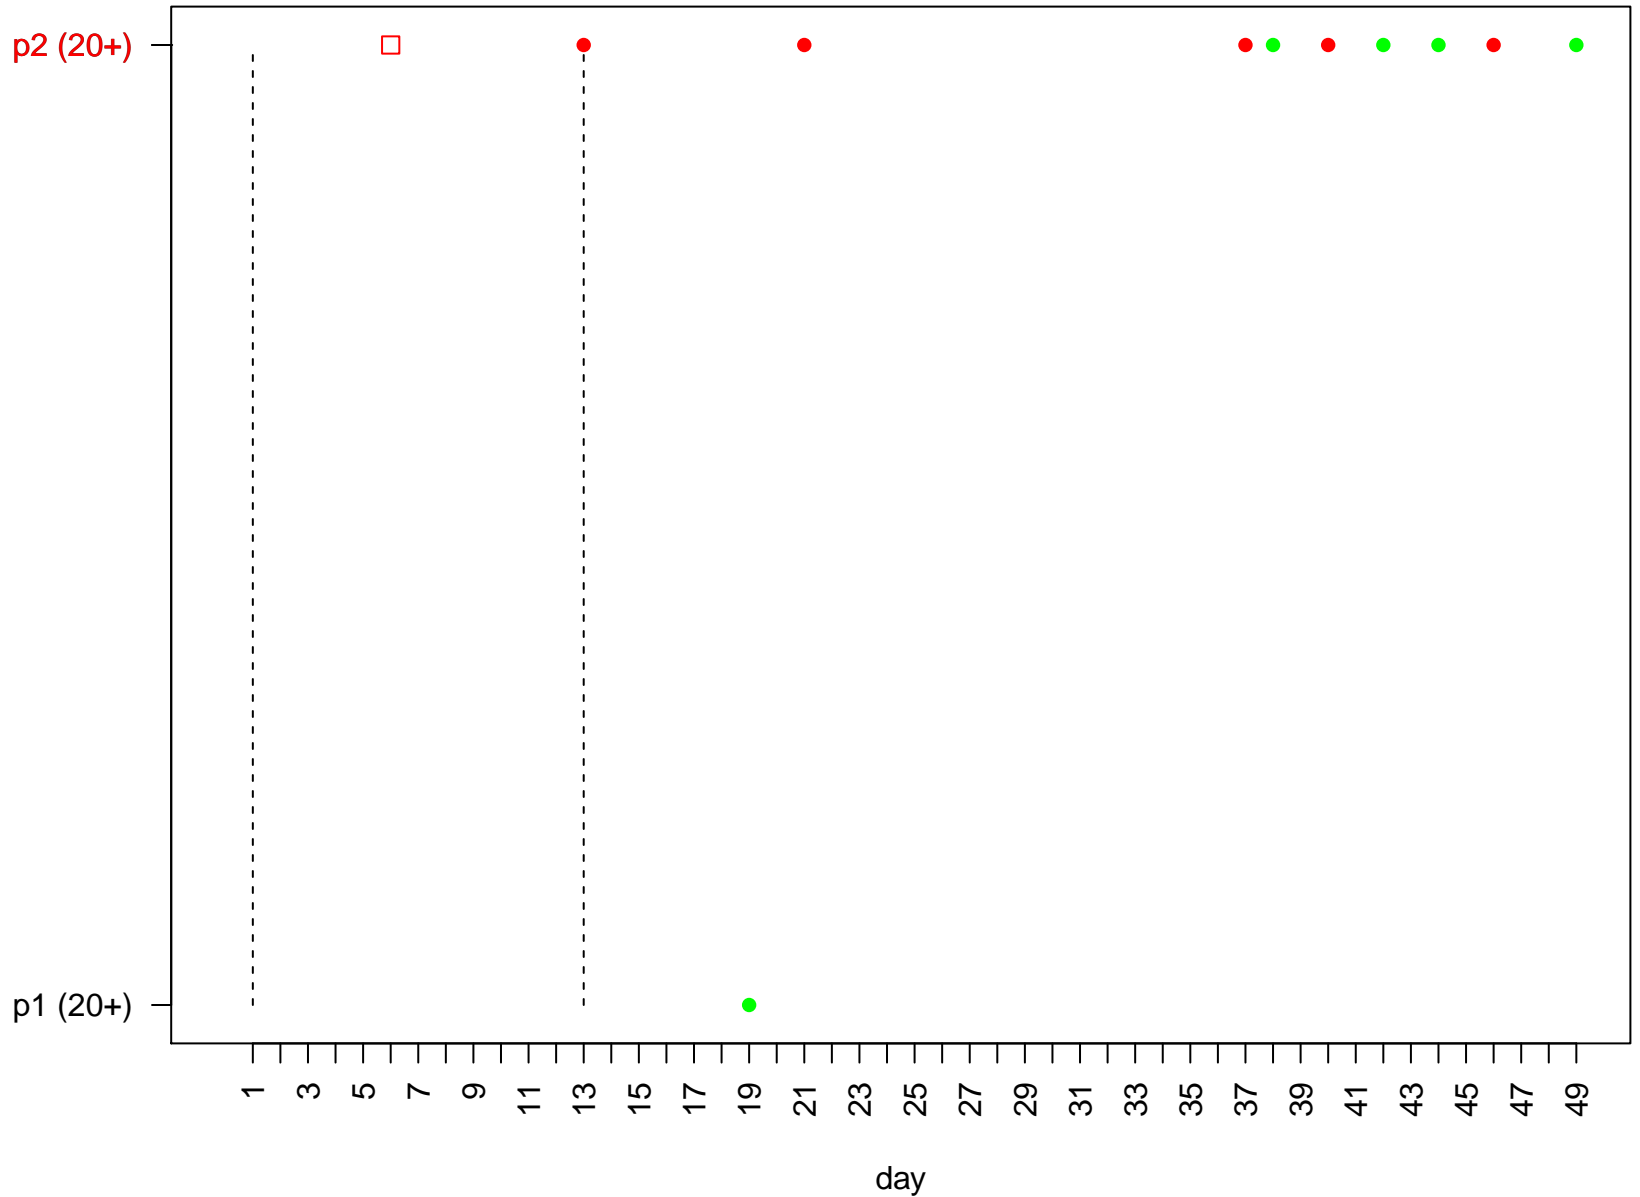

# Household 114

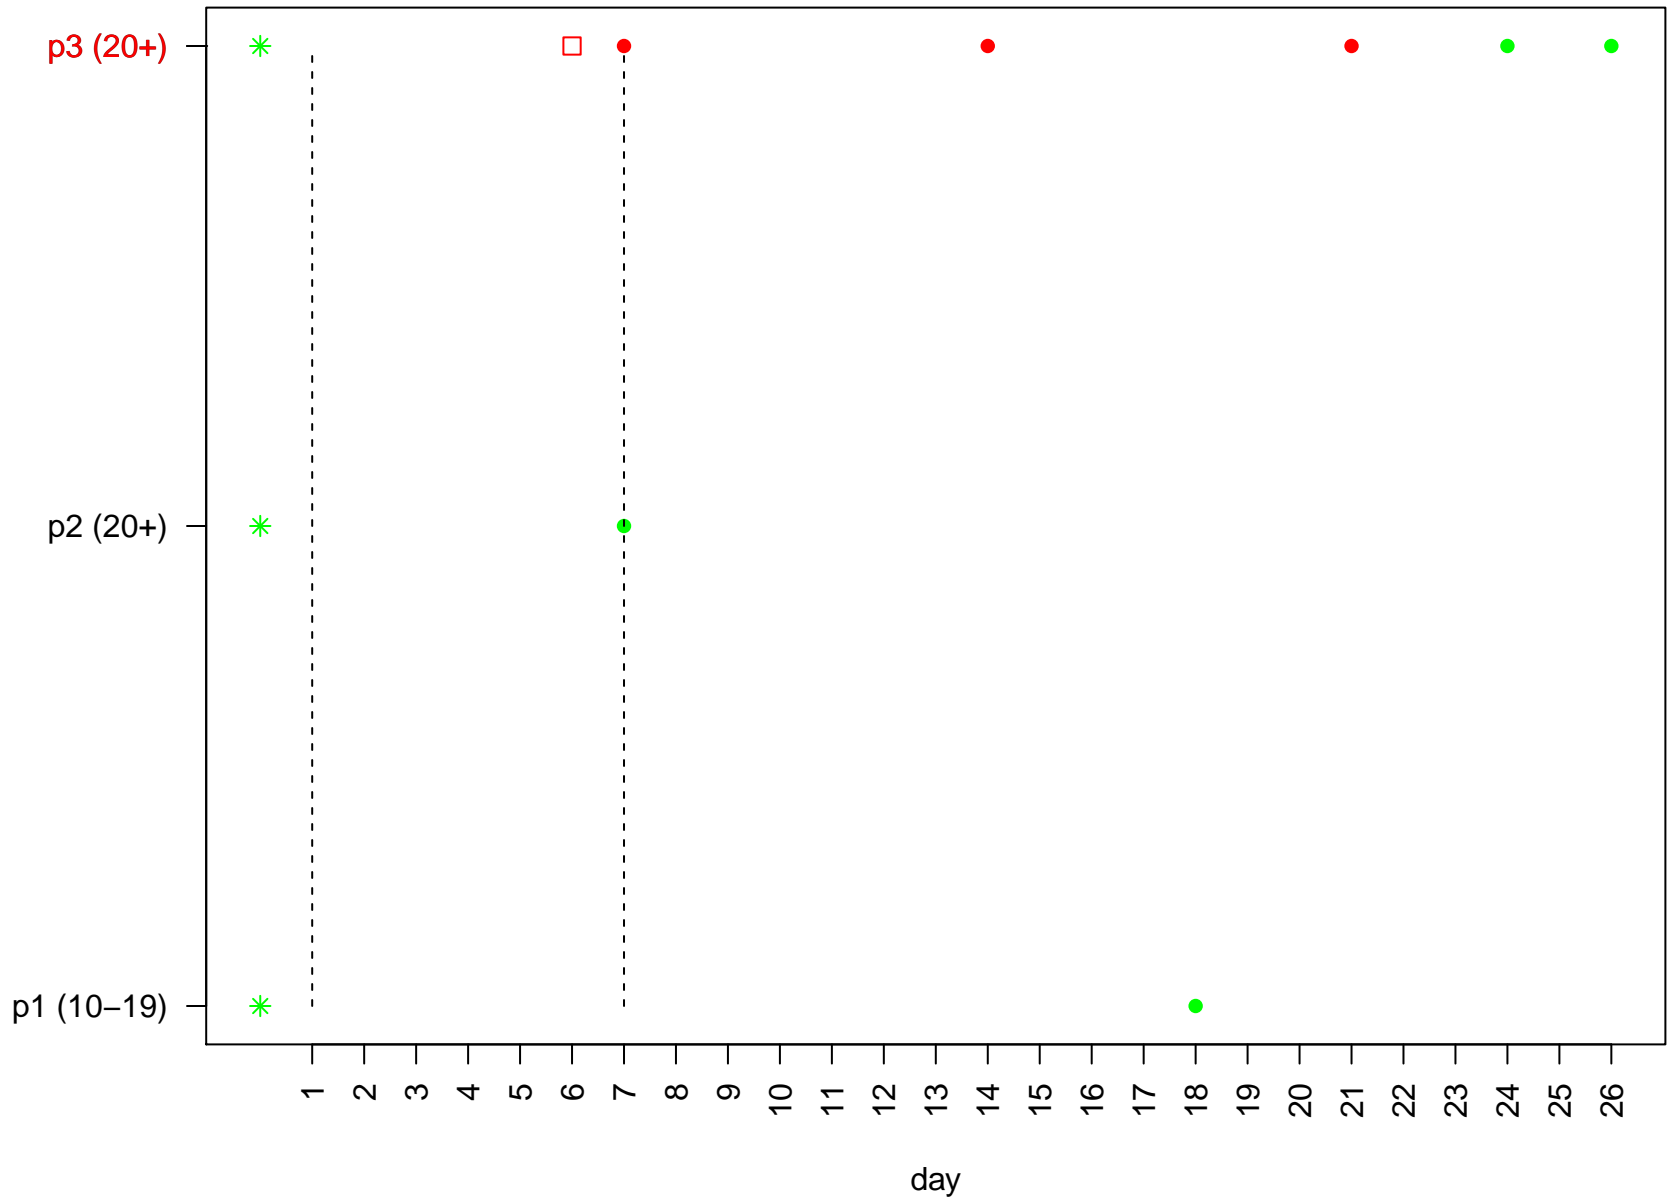

# Household 115

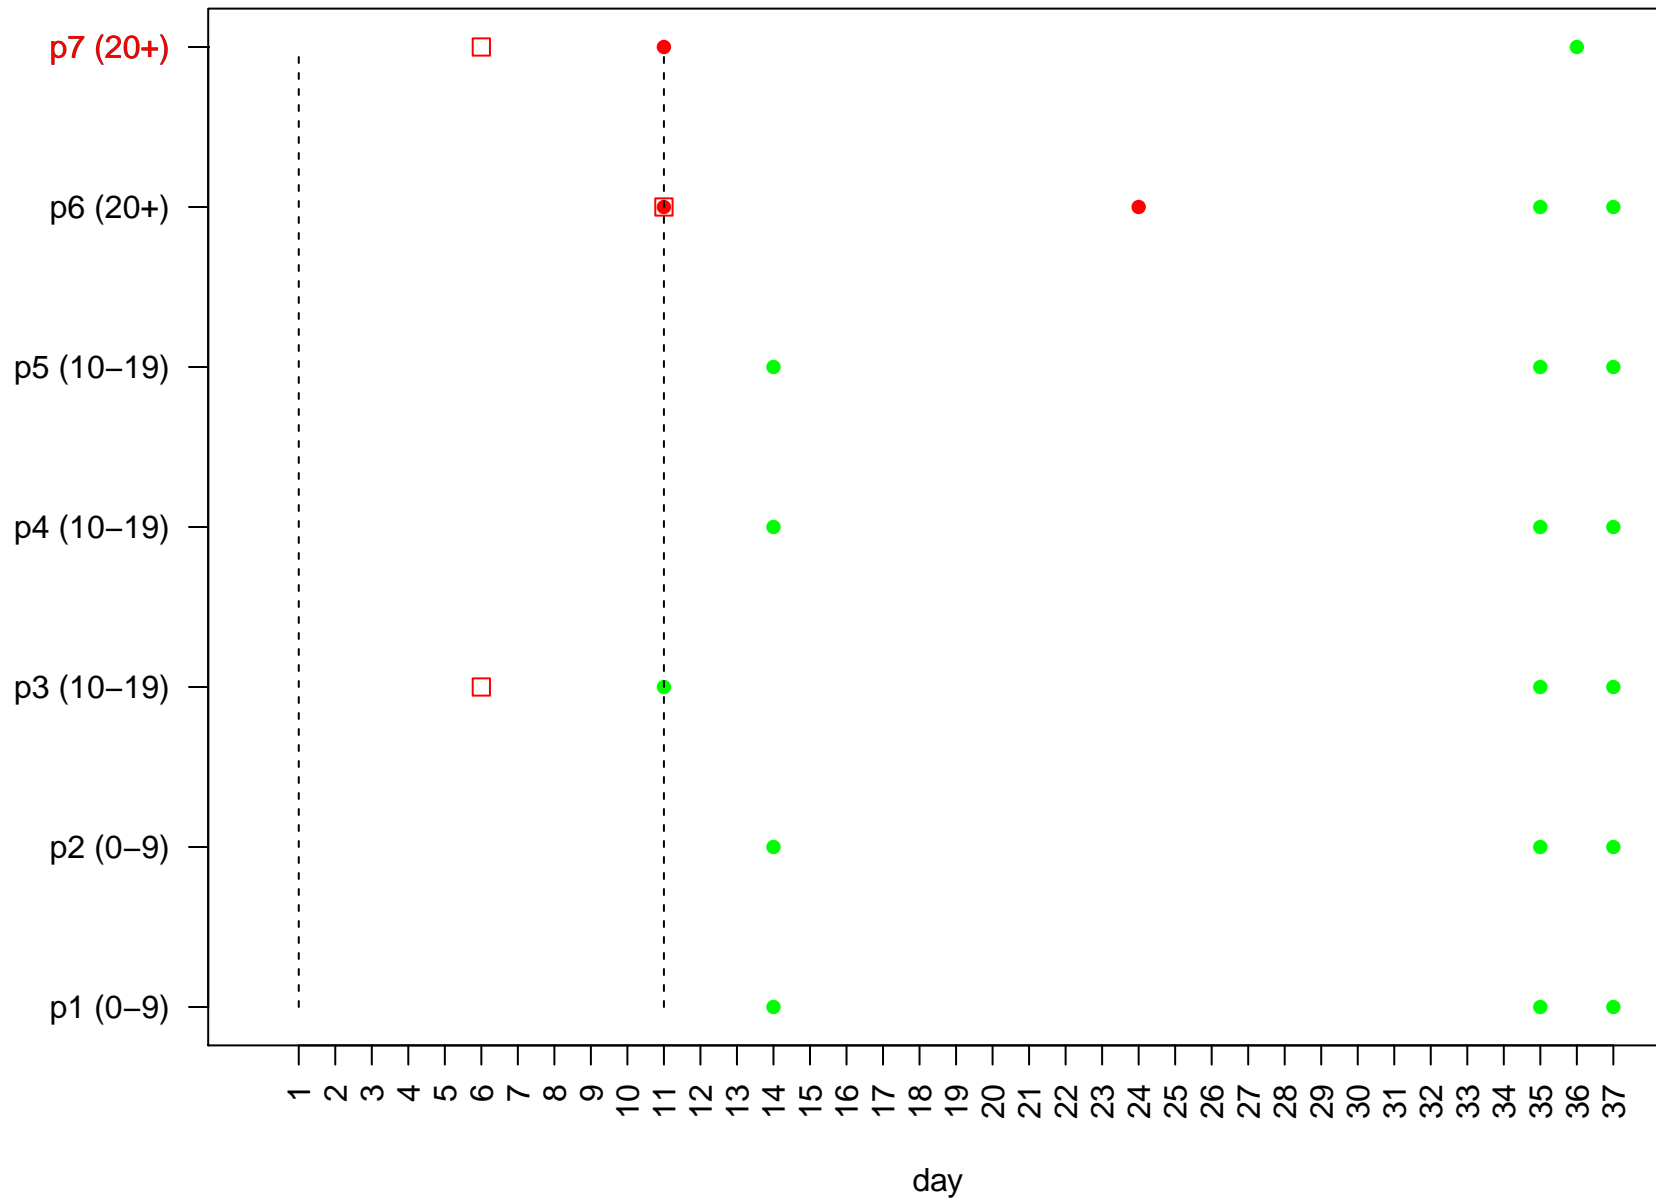

# Household 116

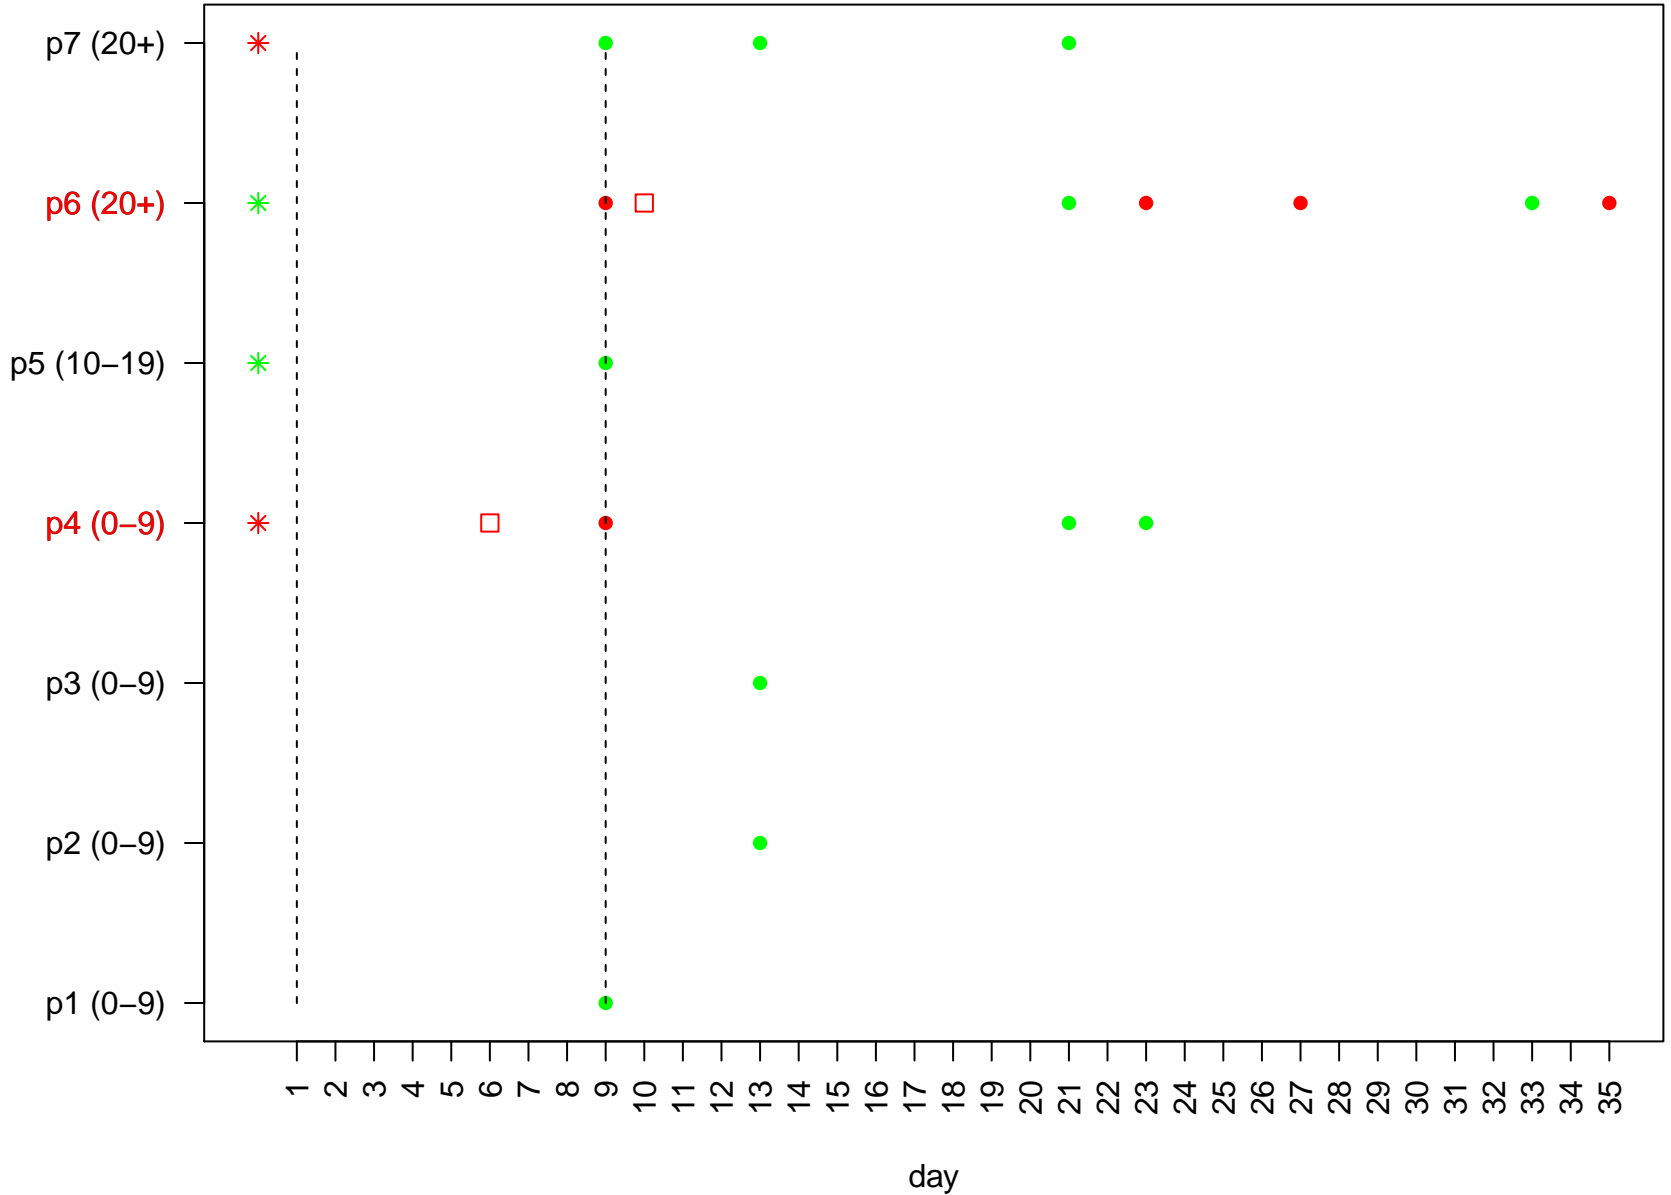

# Household 117

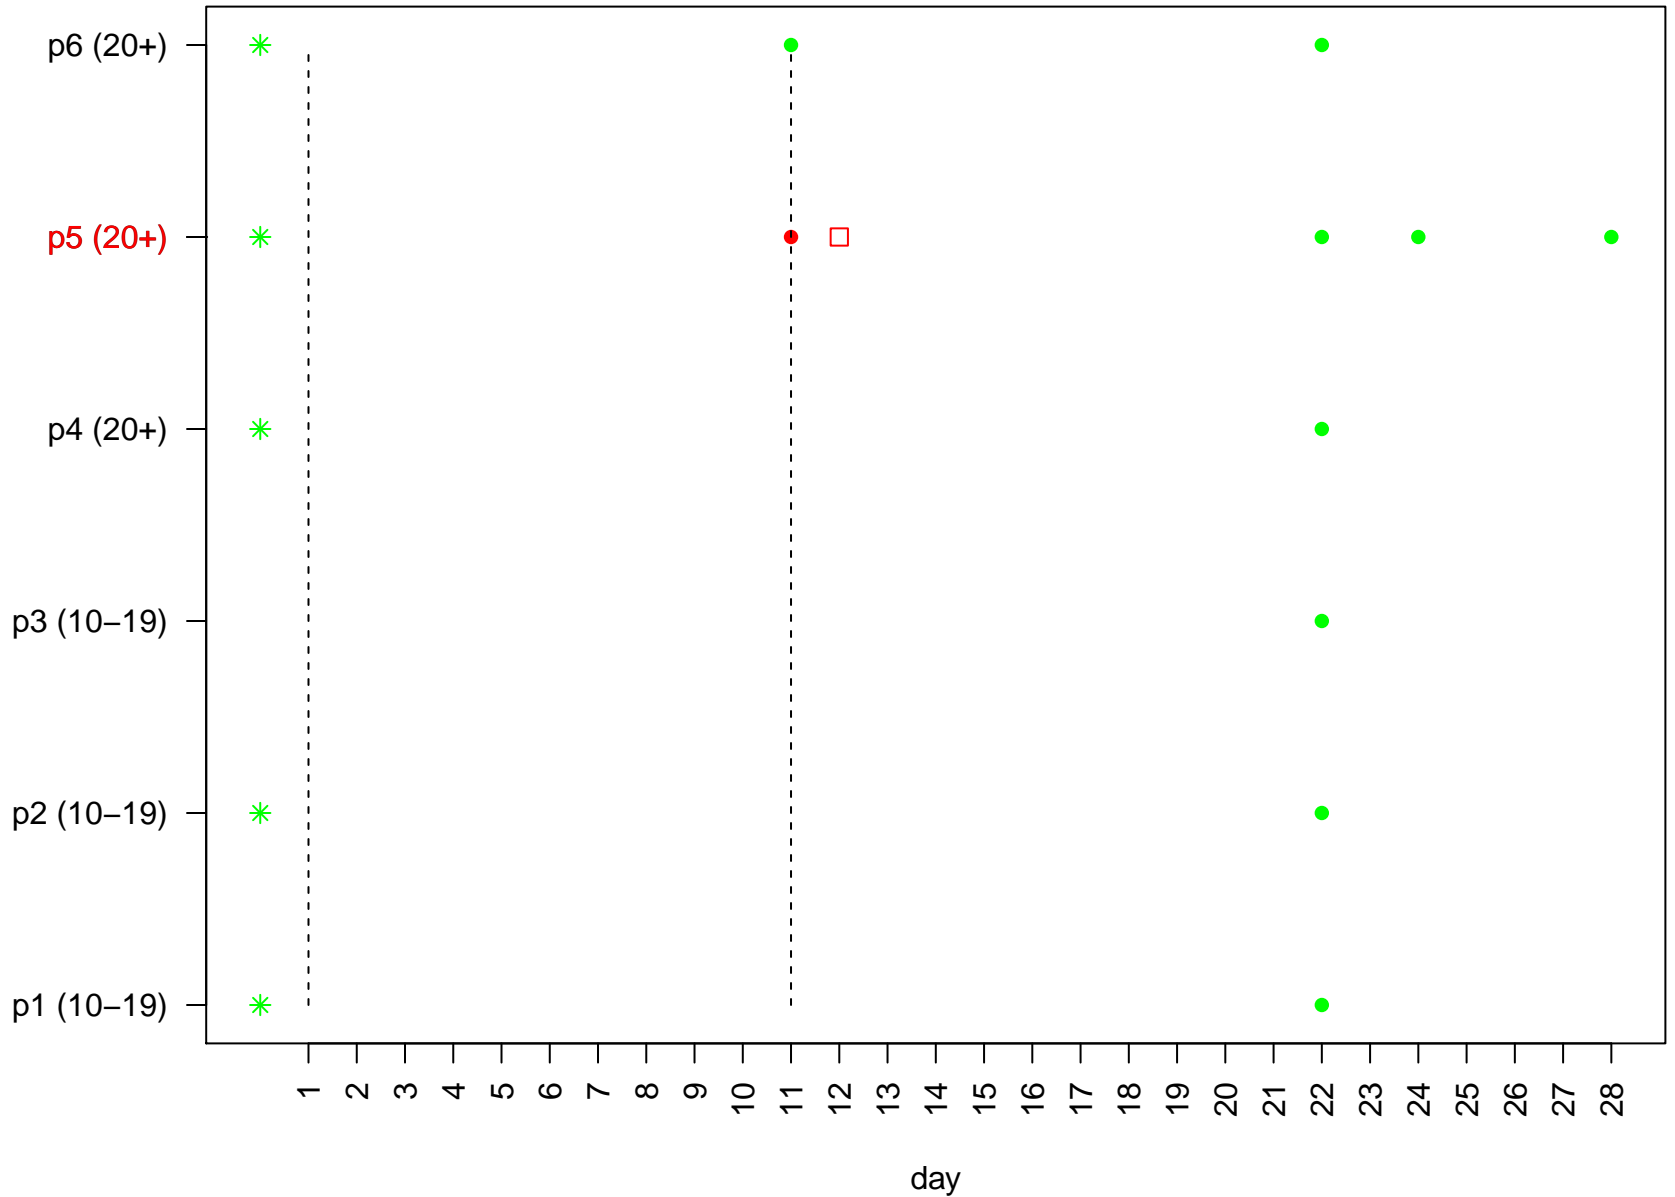



# Household 119

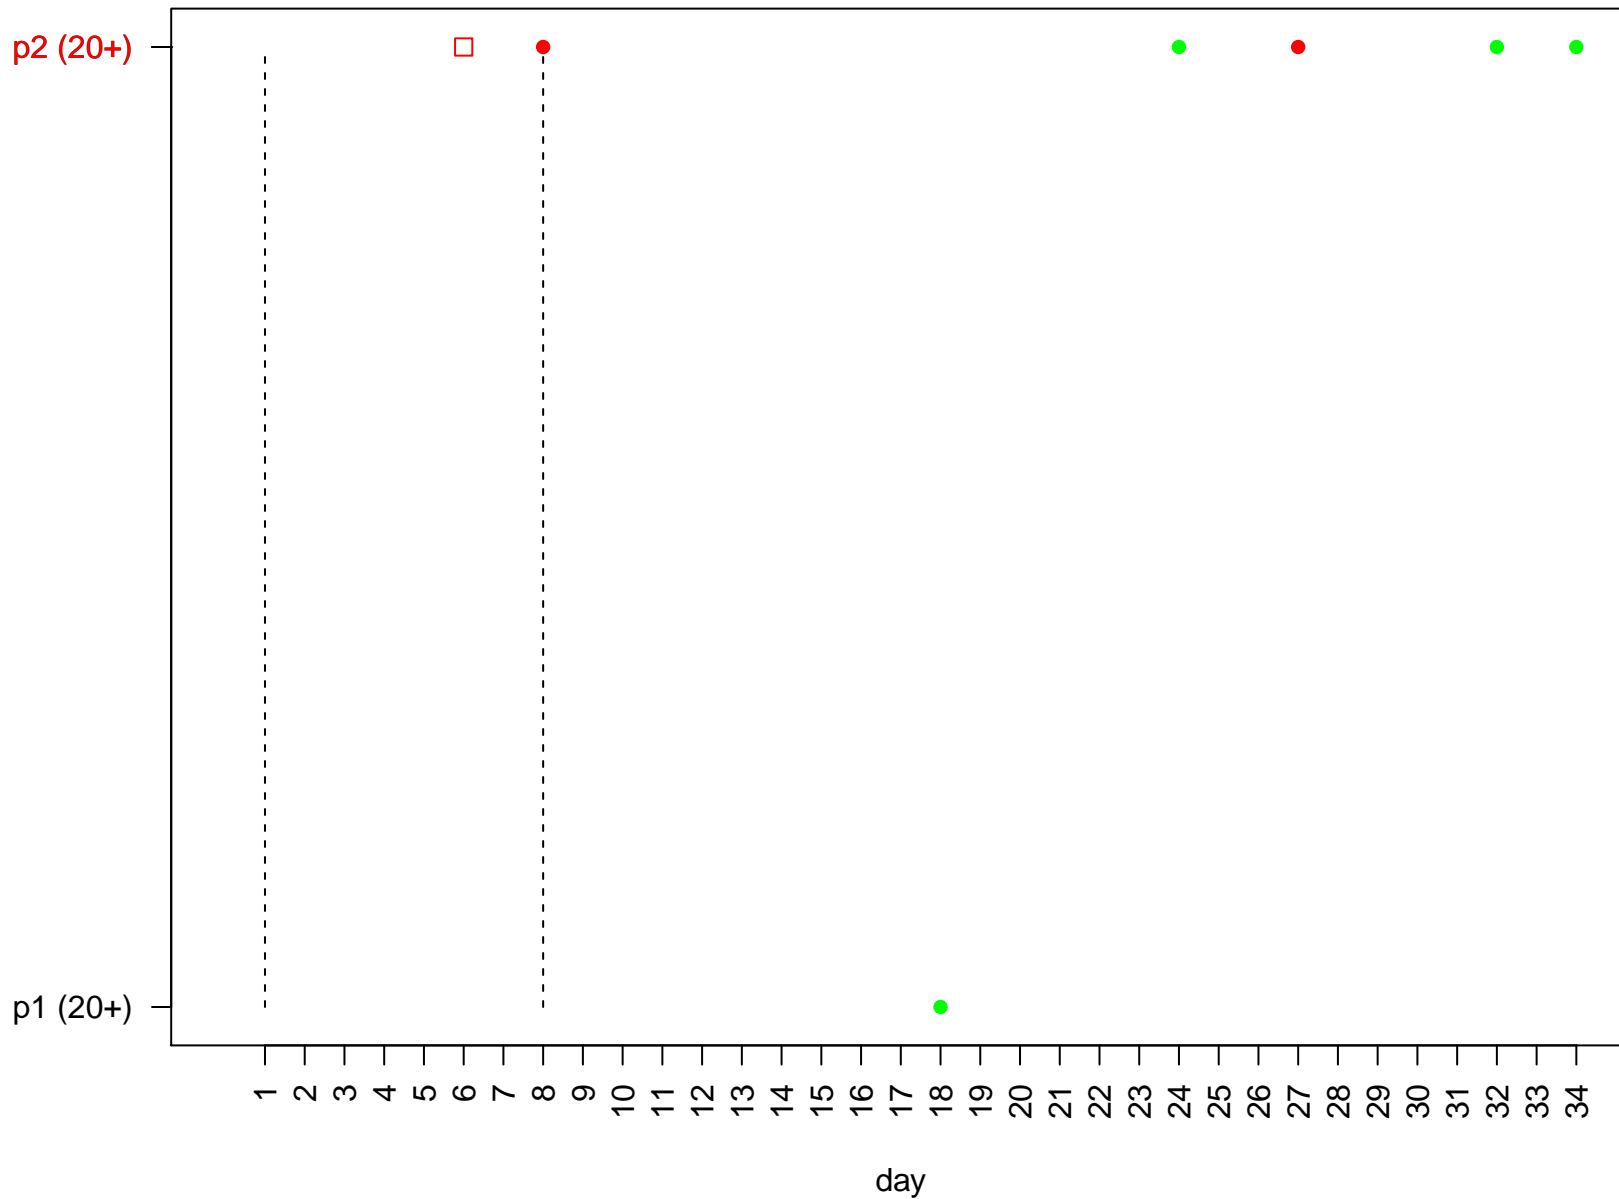

# Household 120

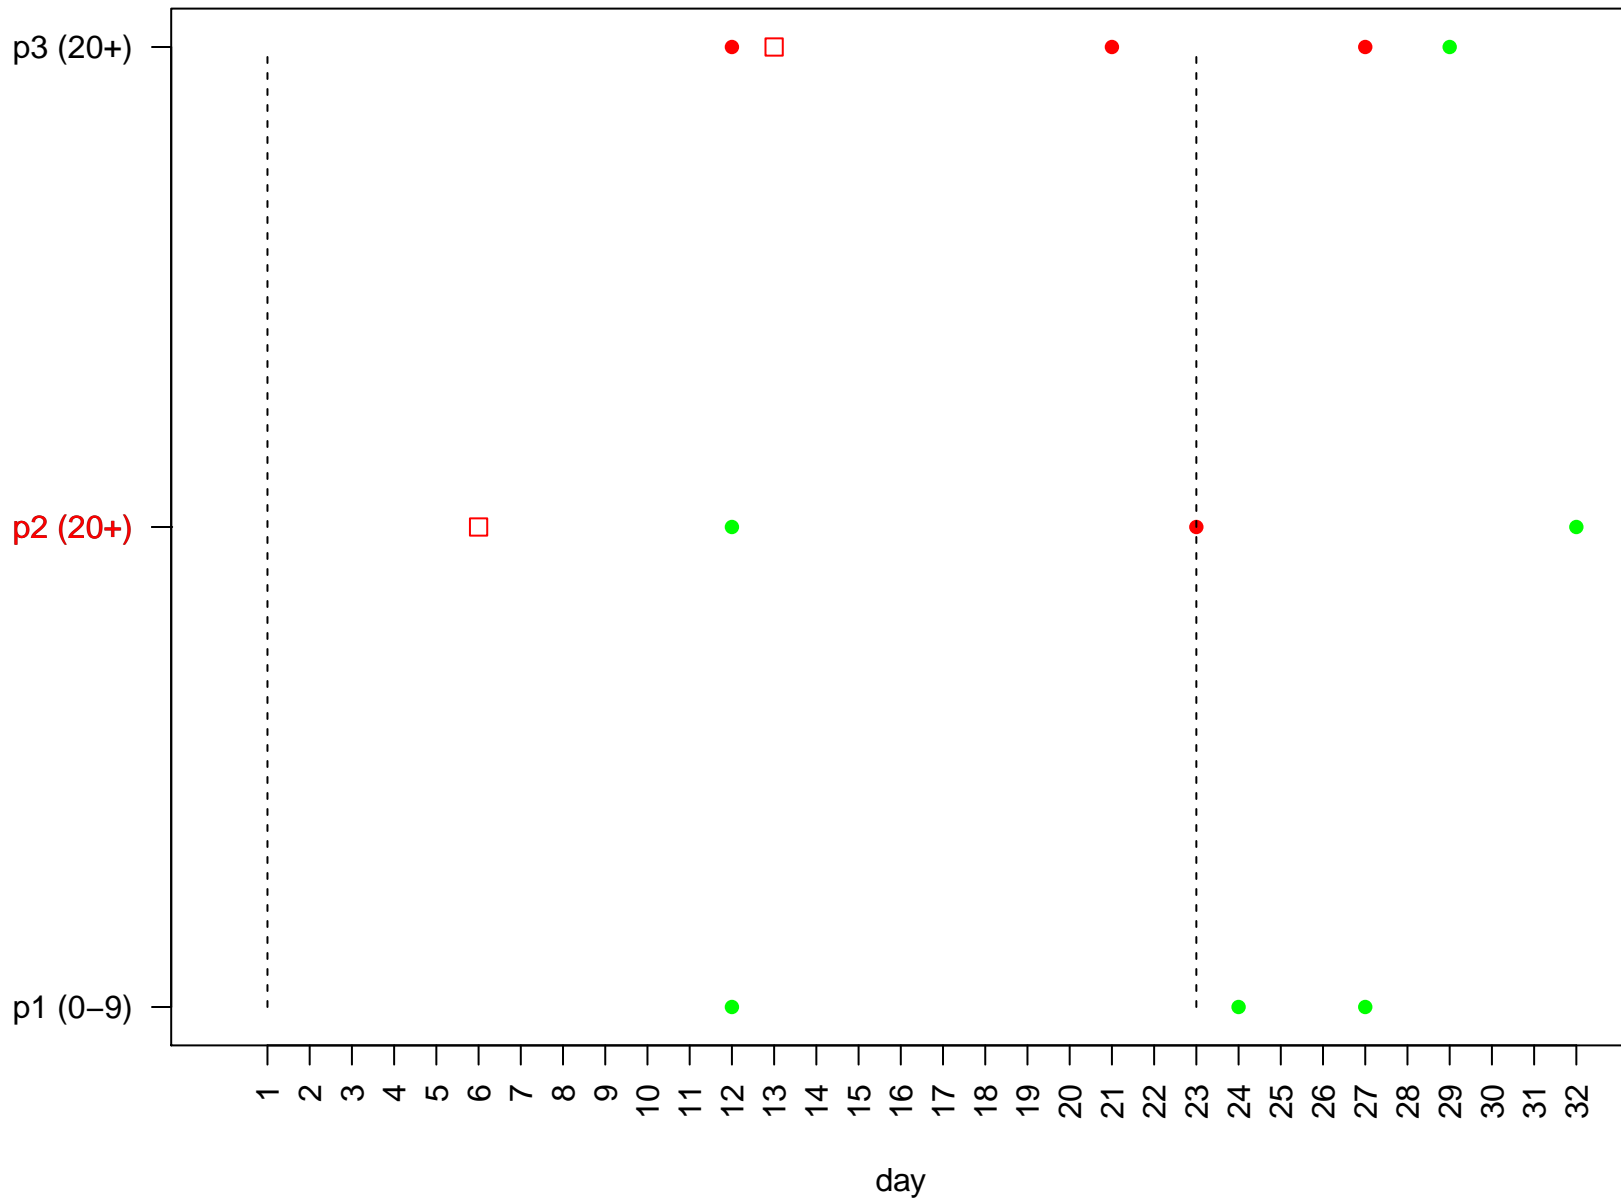

# Household 121

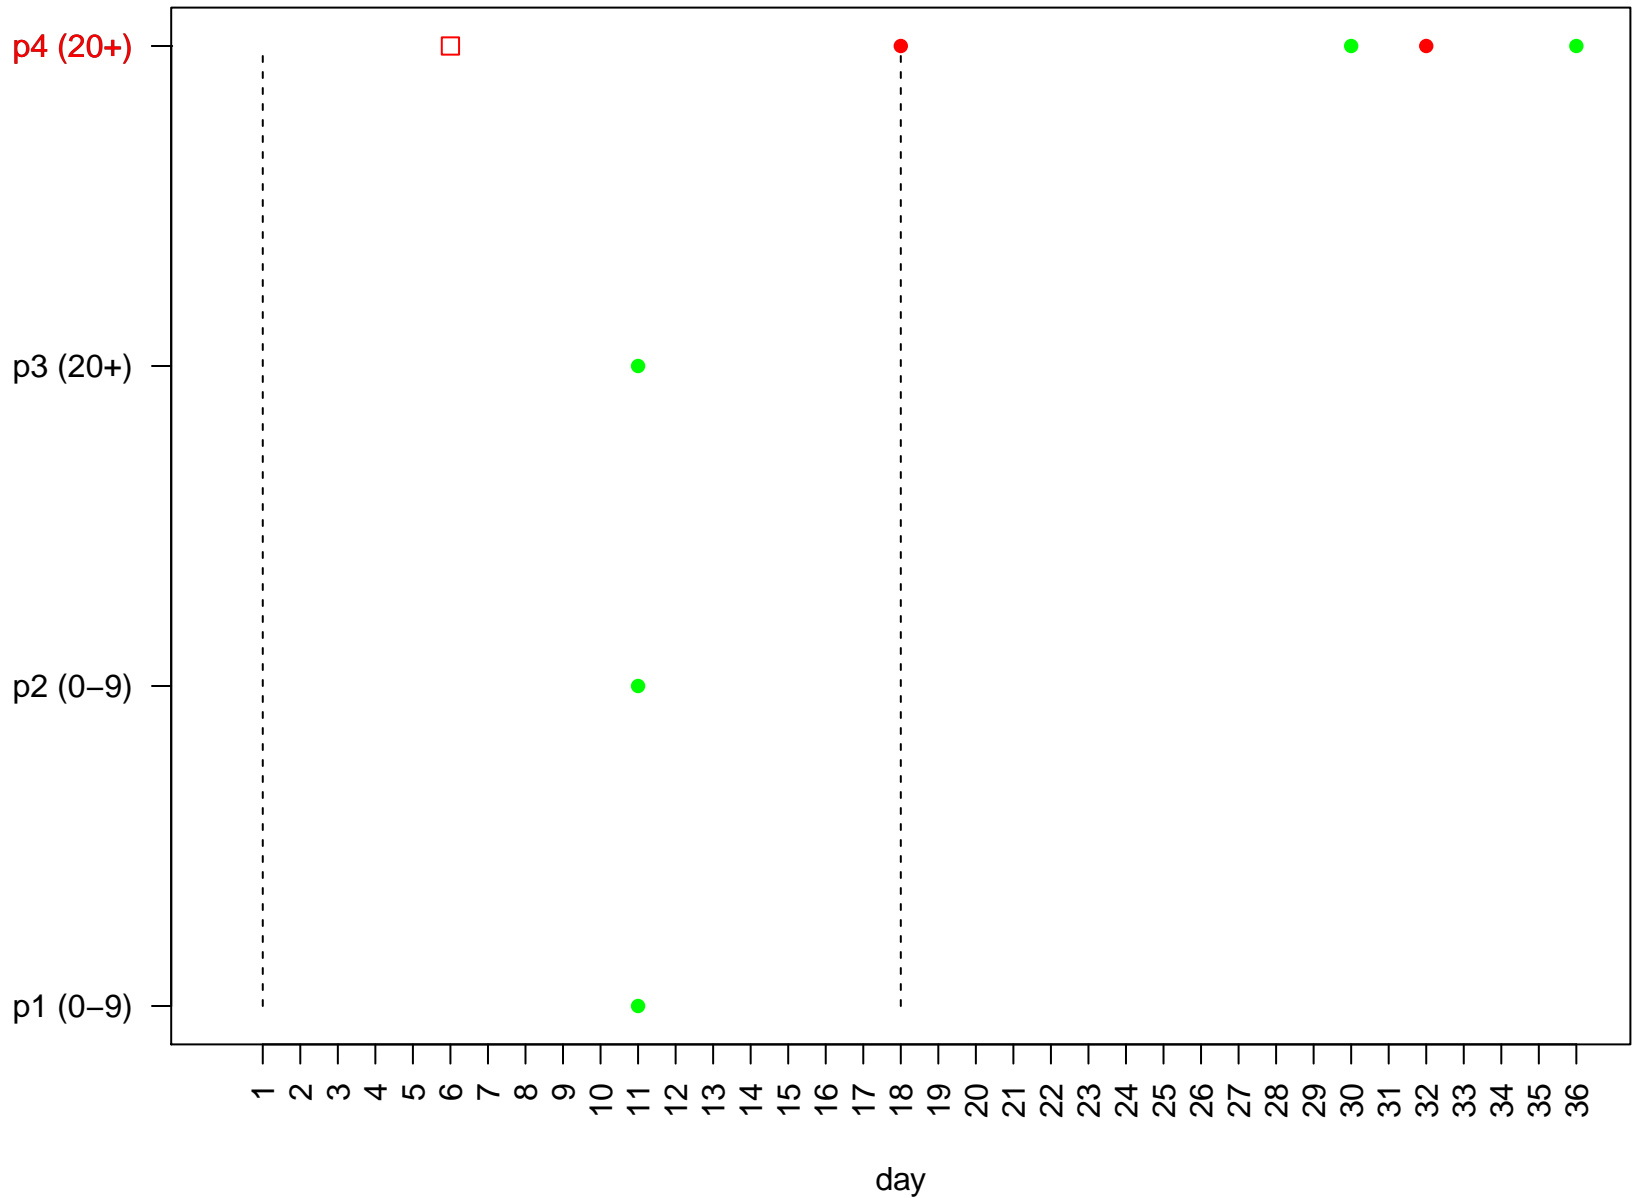

# Household 122

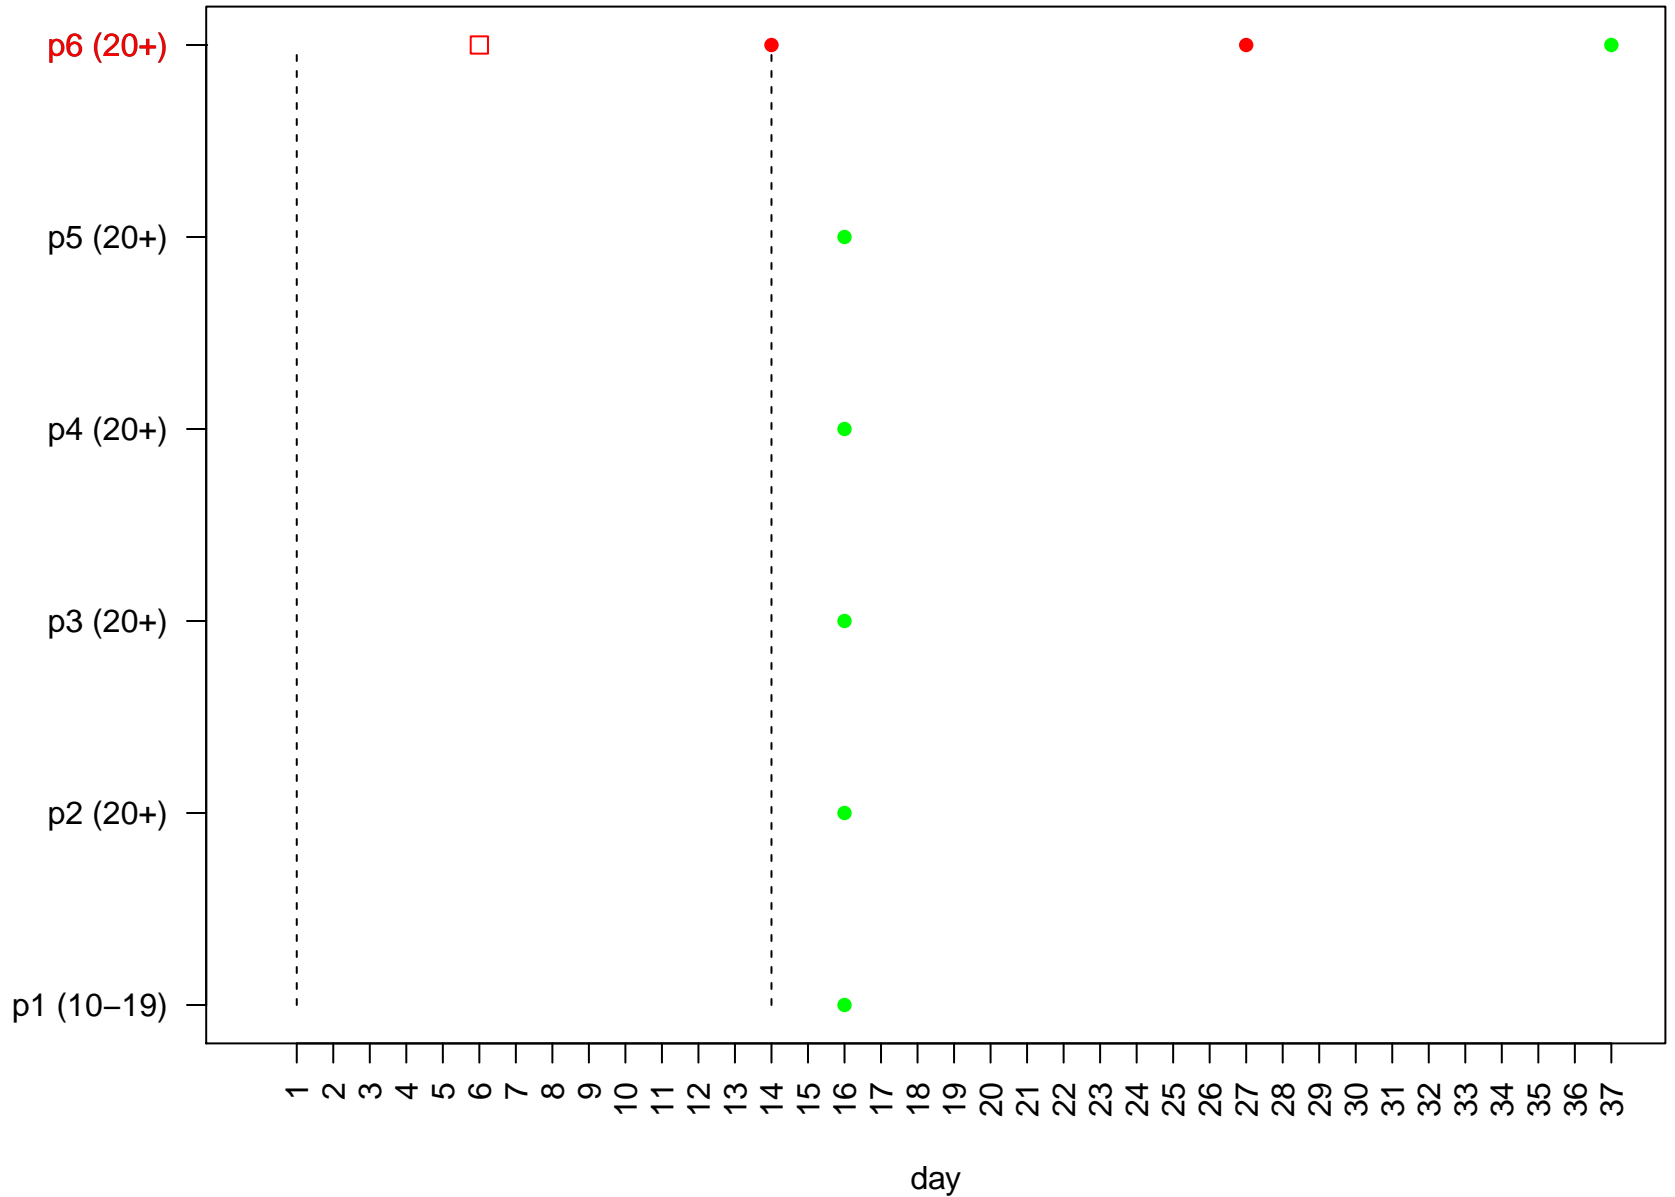

# Household 123

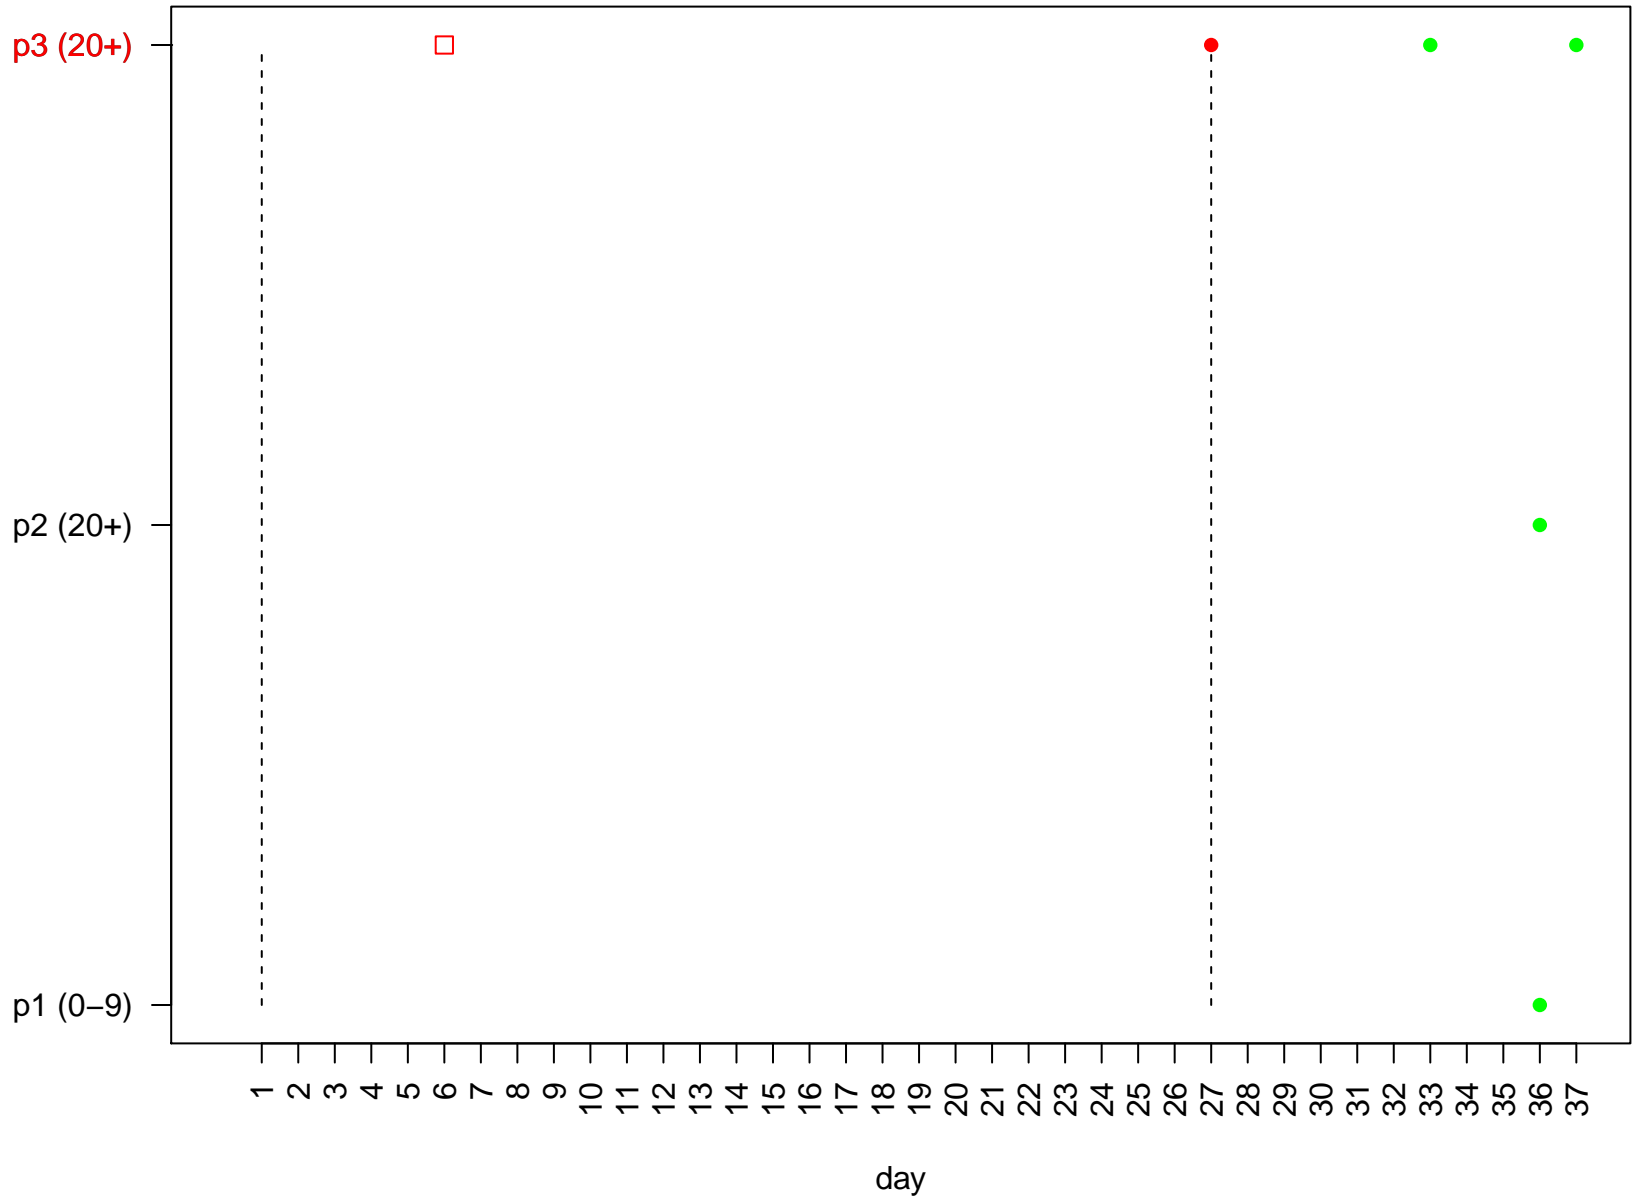

# Household 124

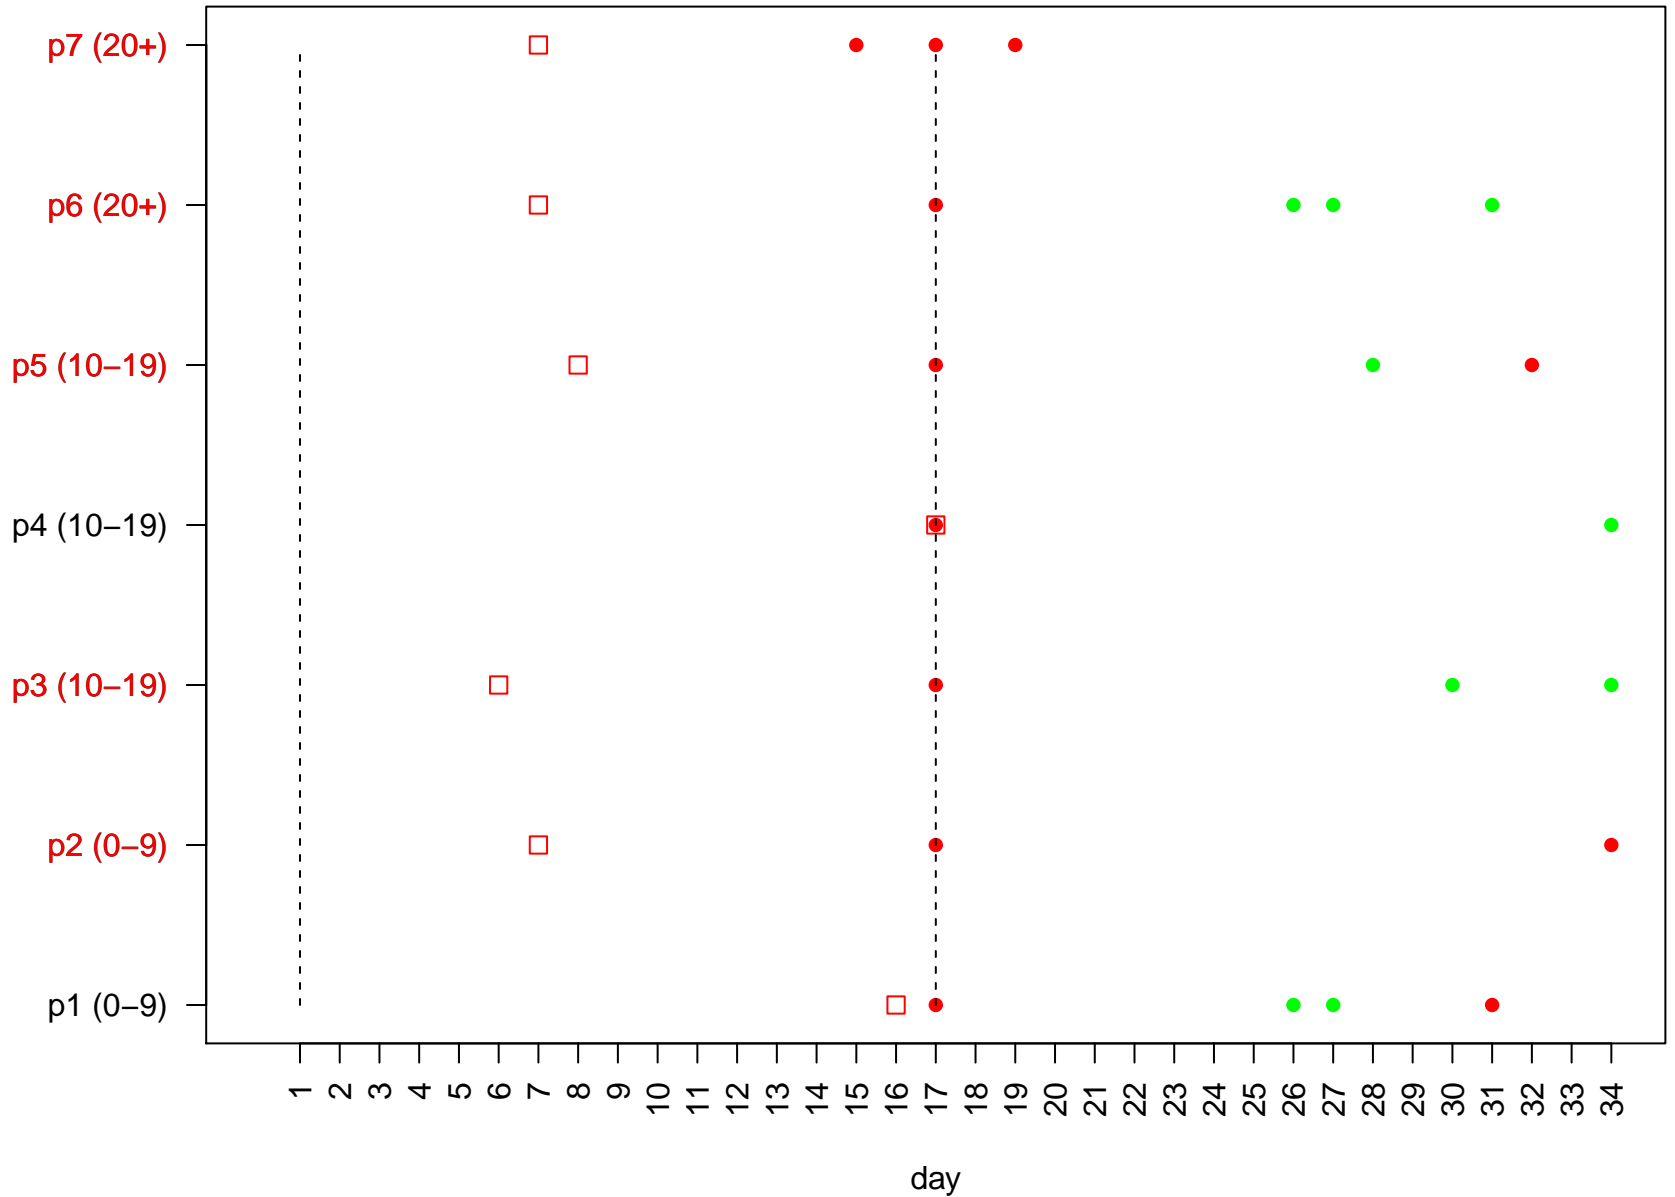

# Household 125

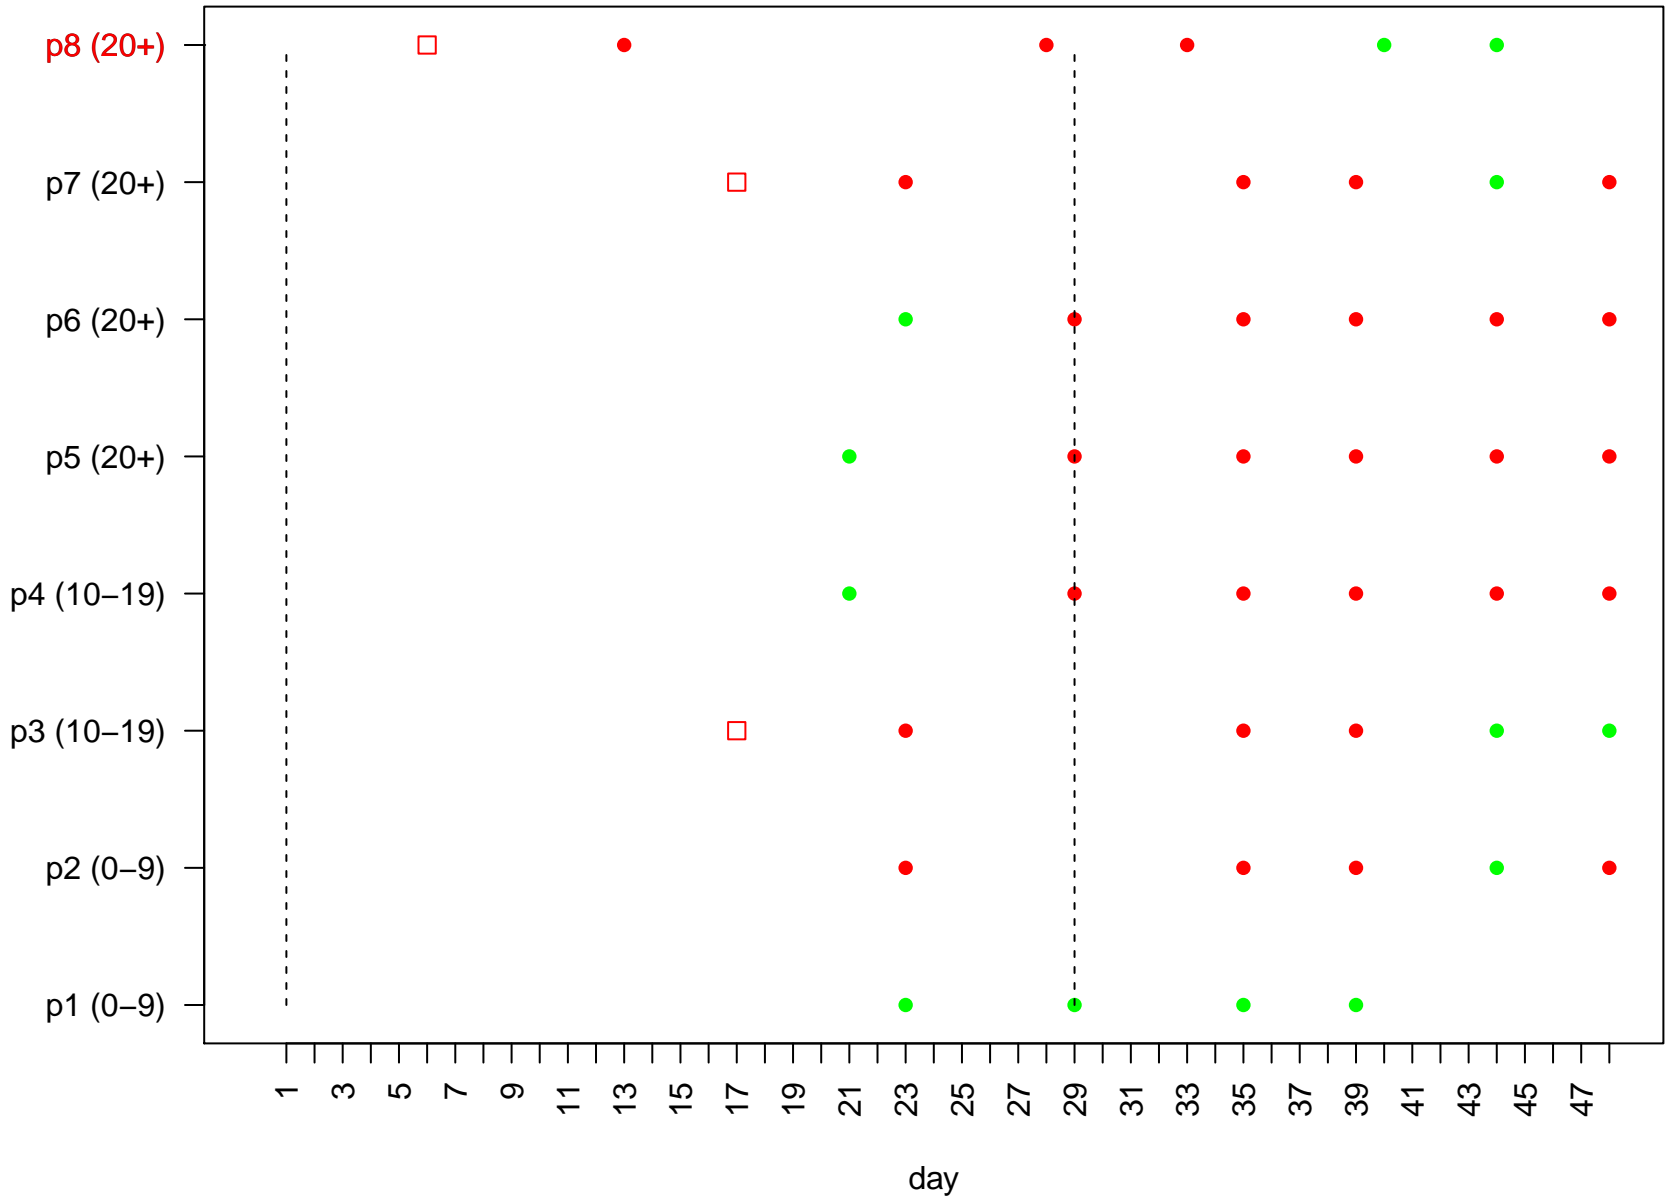

# Household 126

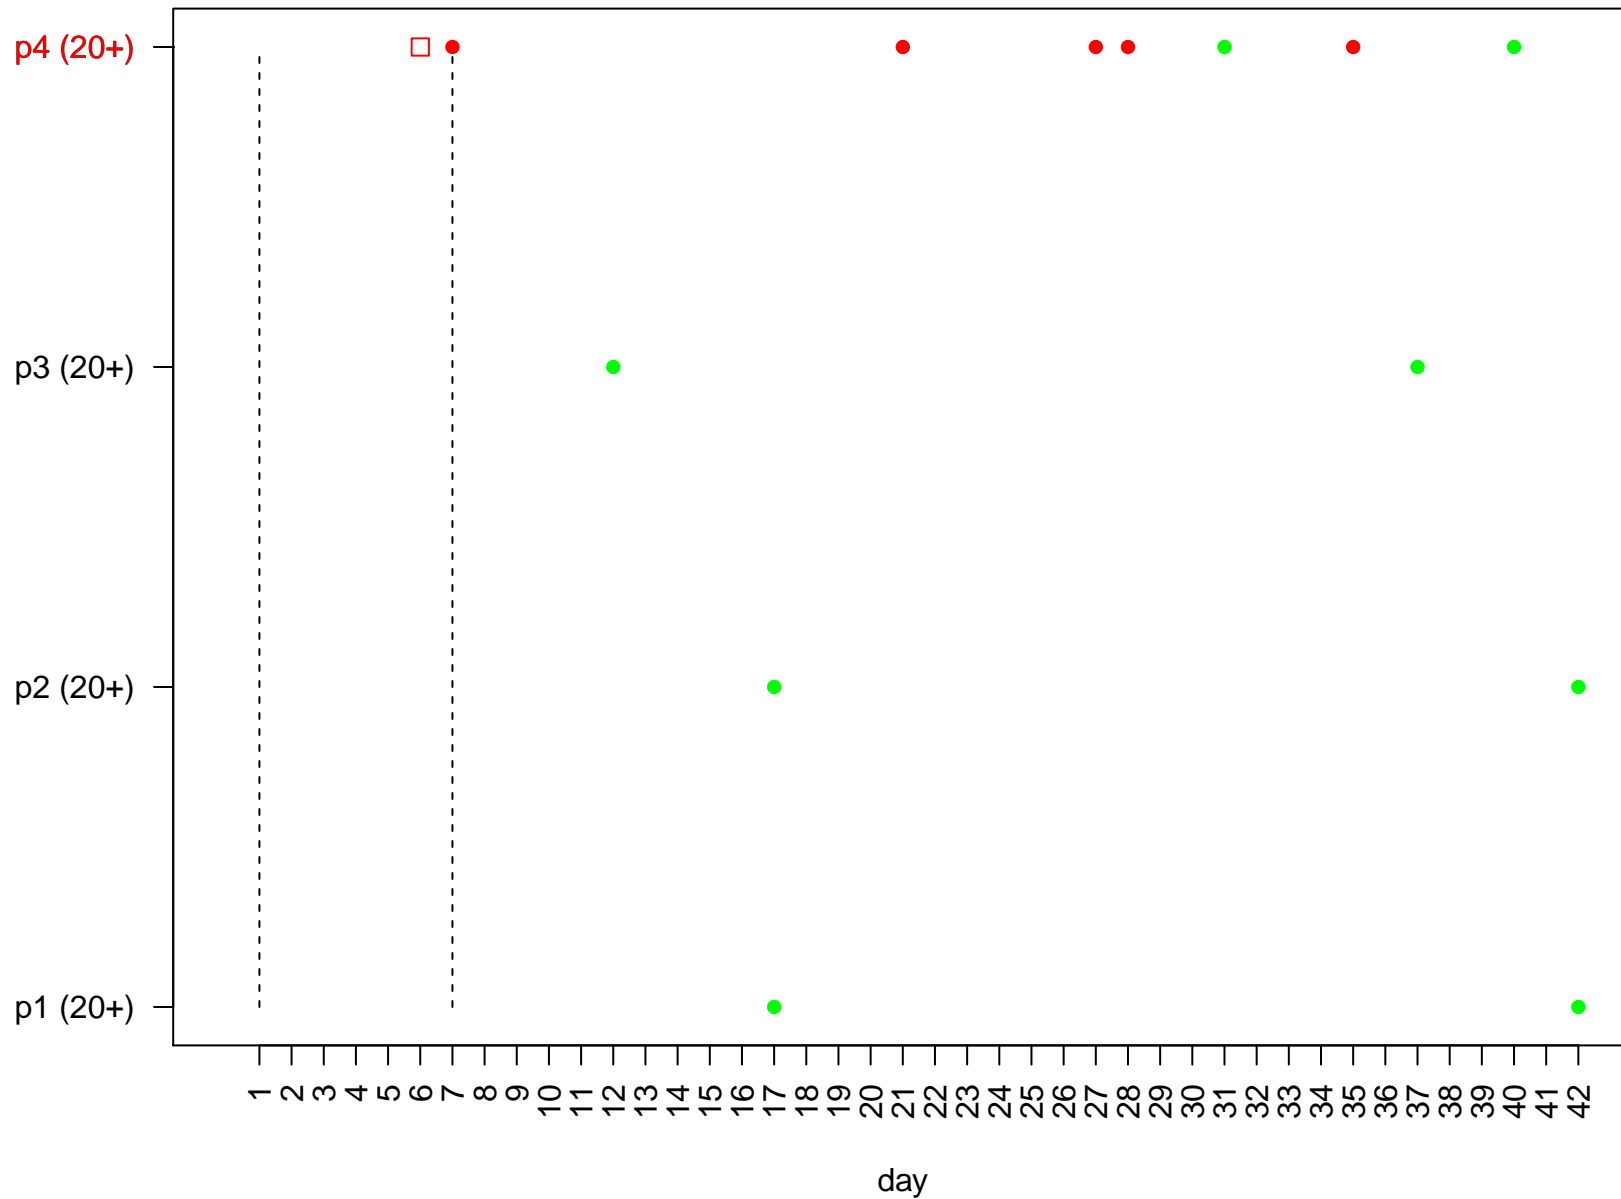



# Household 127

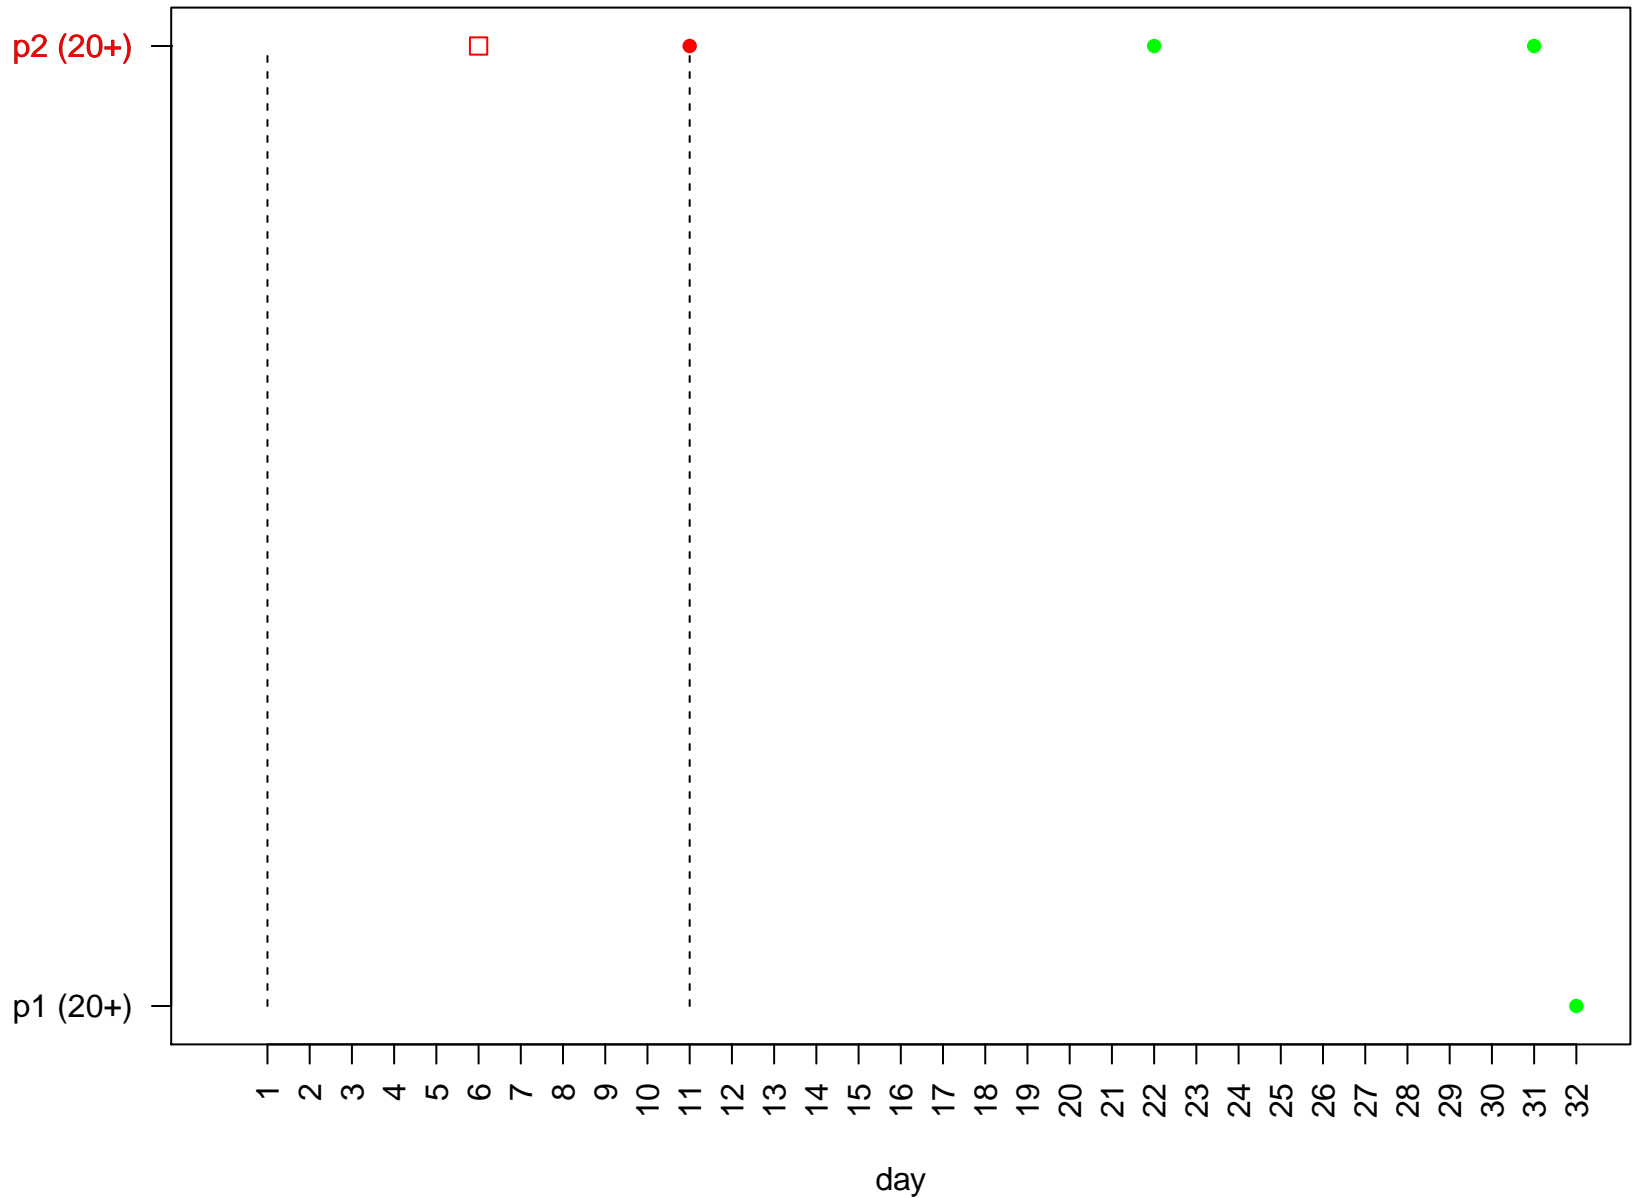

# Household 128

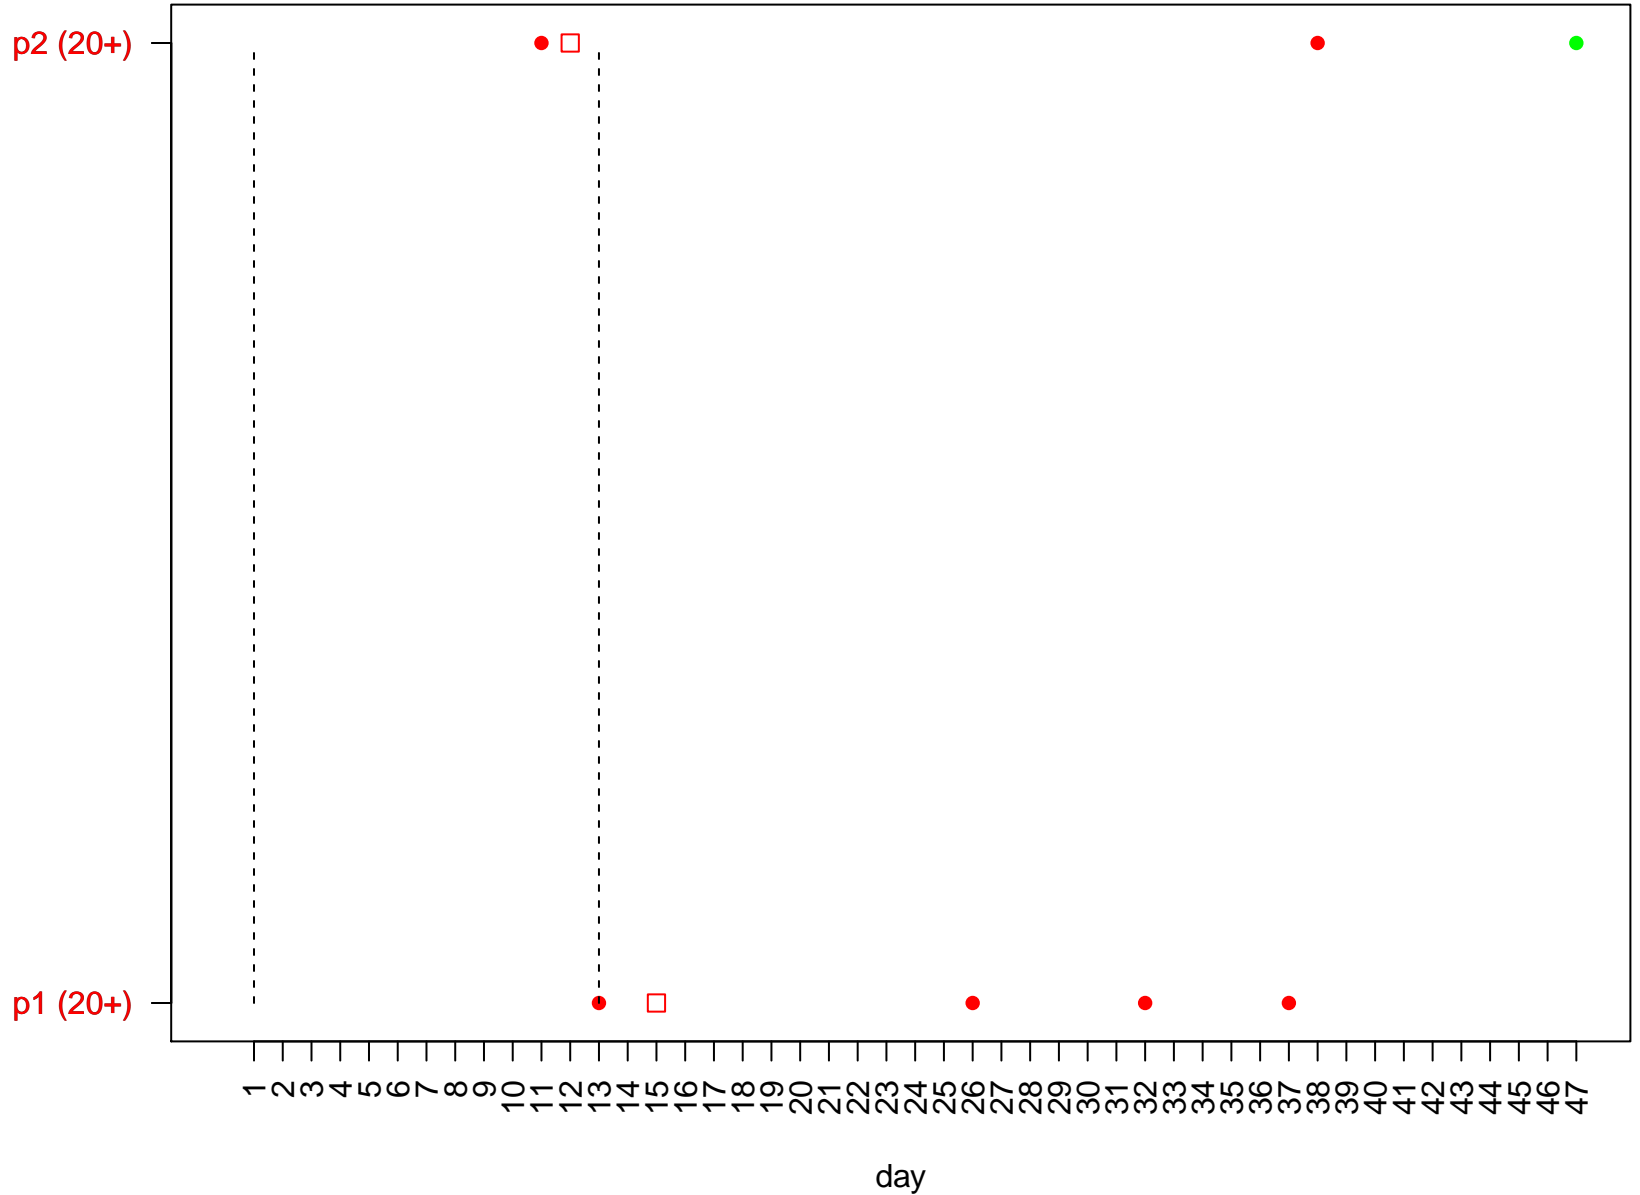

# Household 129

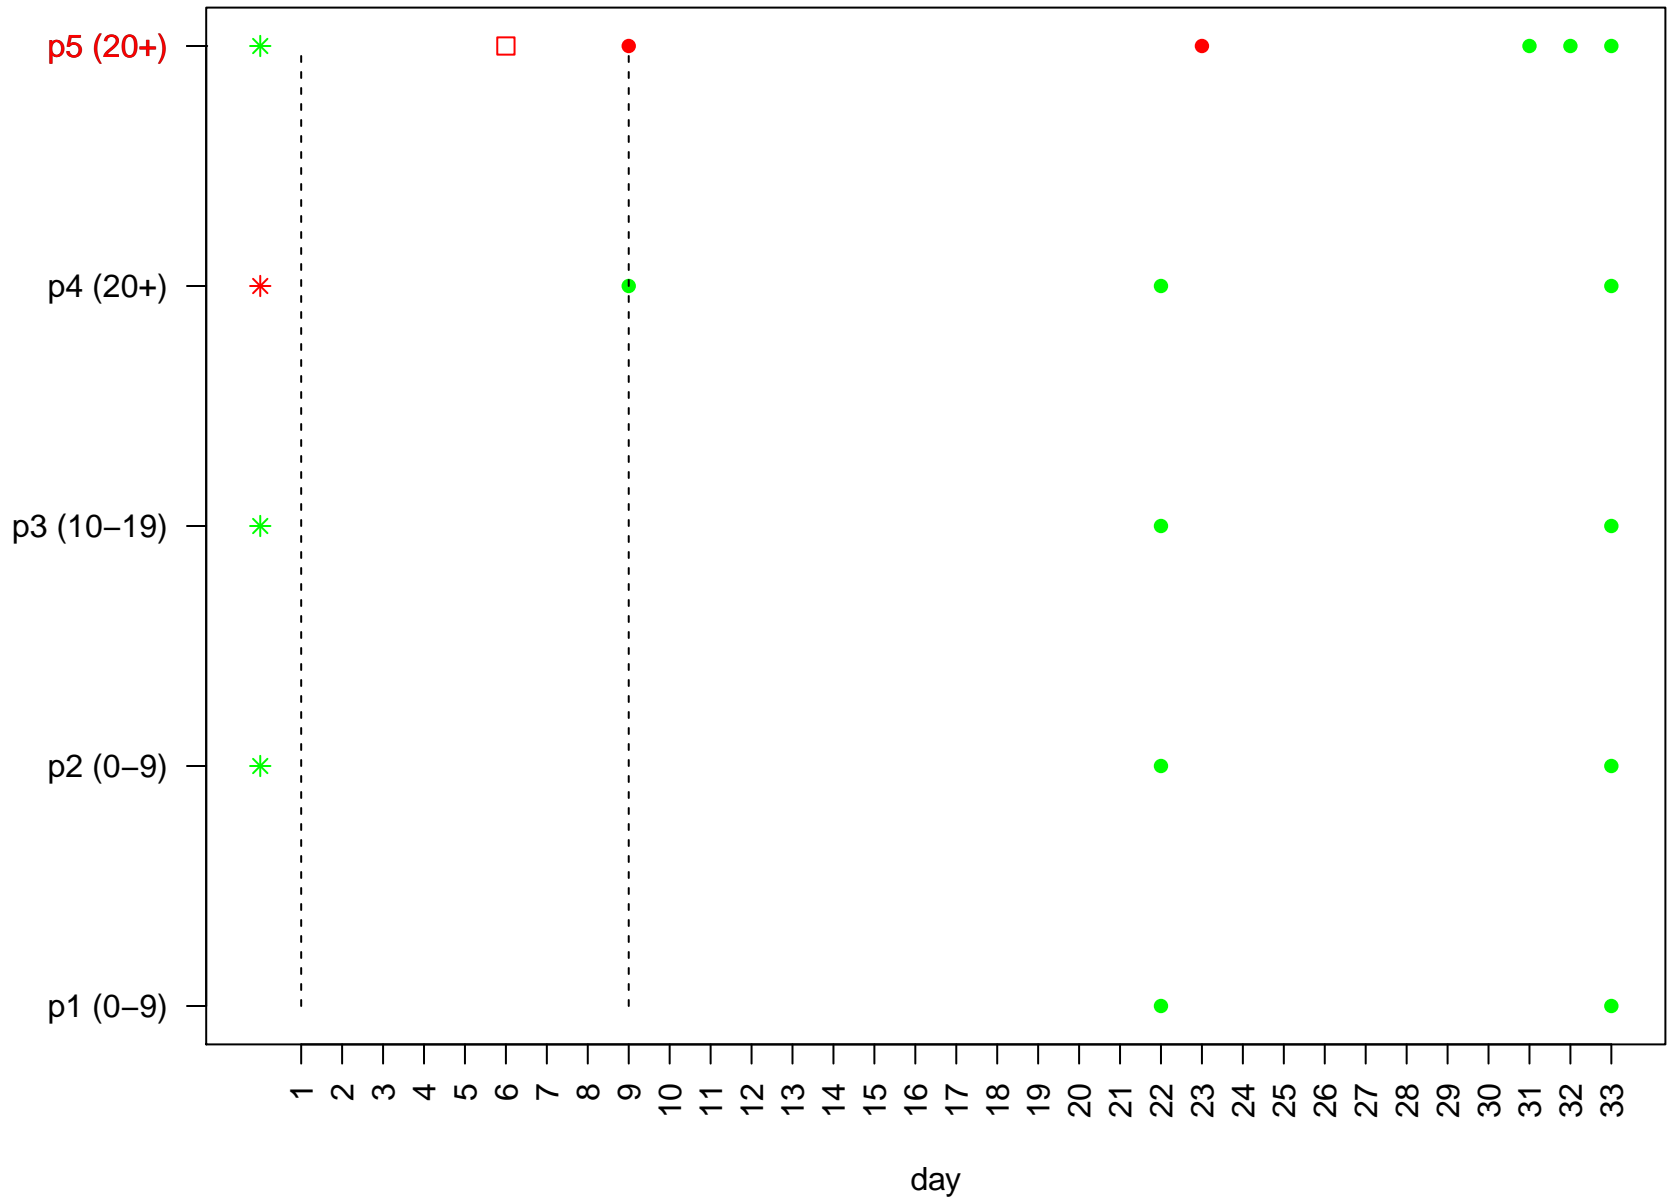

# Household 130

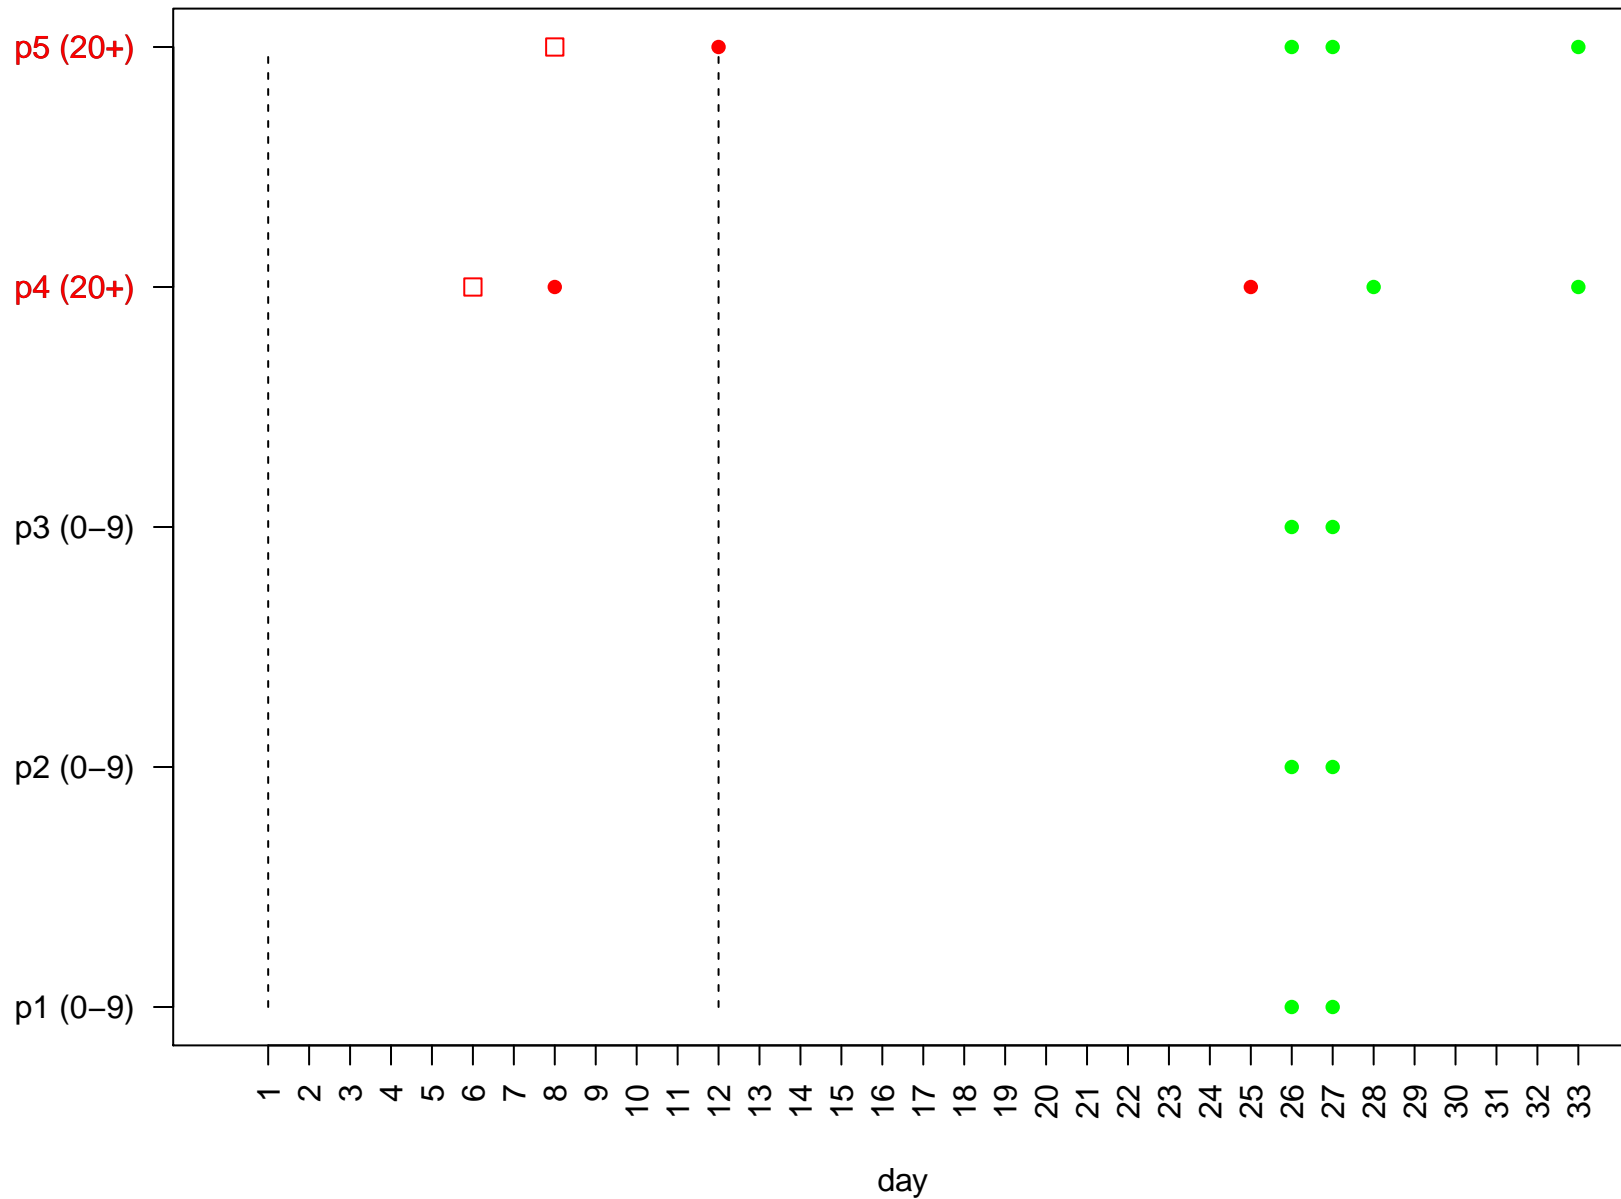

# Household 131

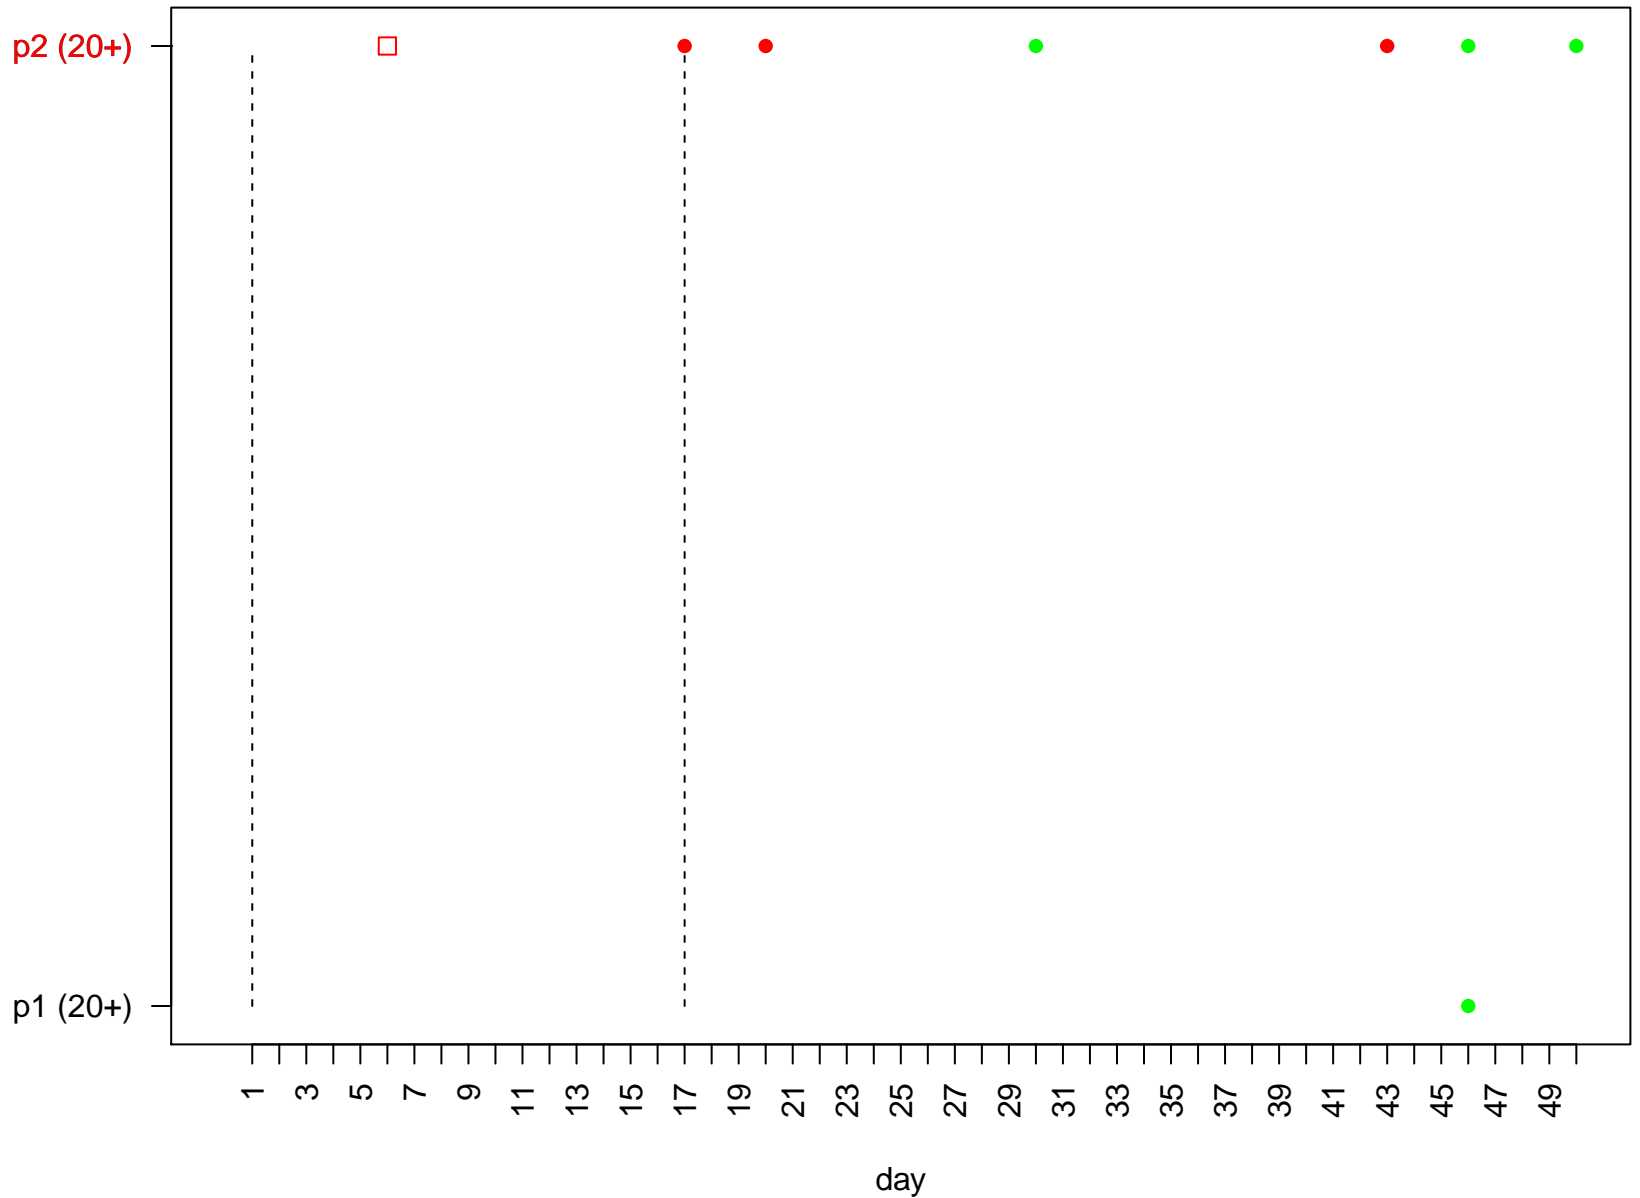

# Household 132

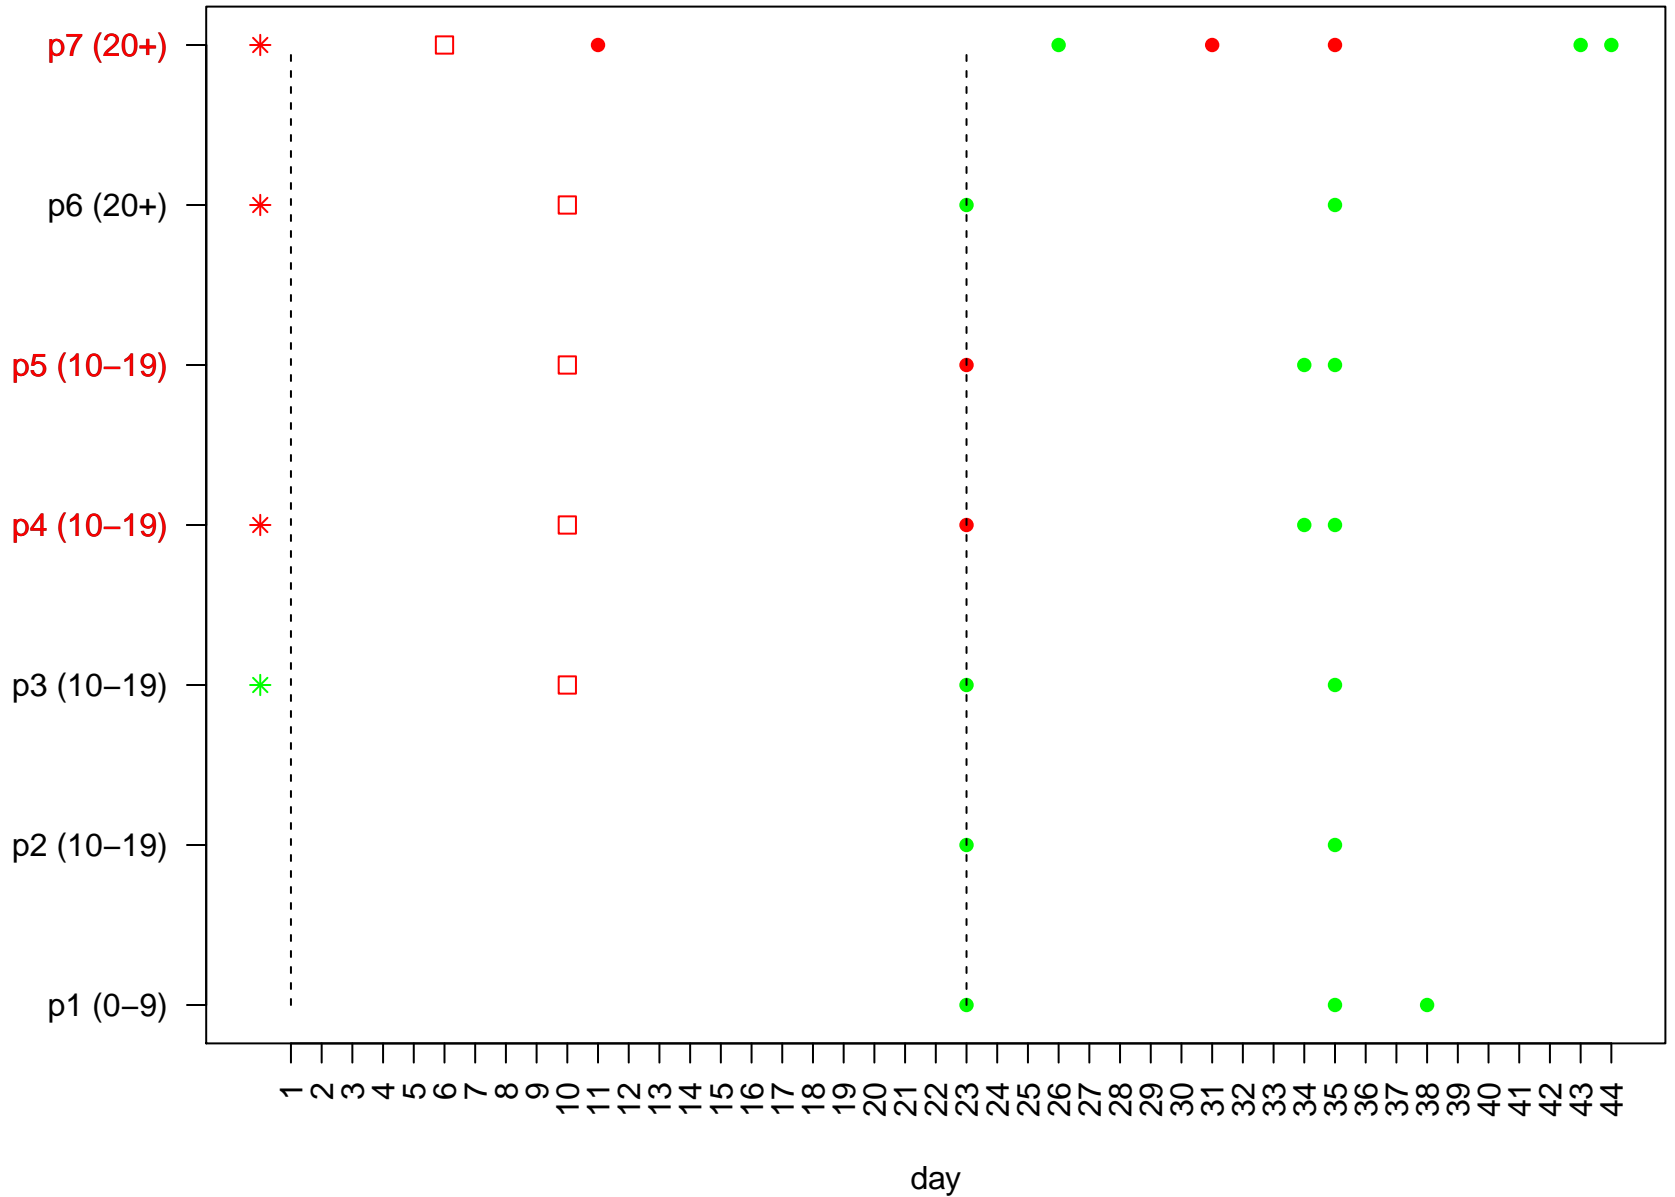

# Household 133

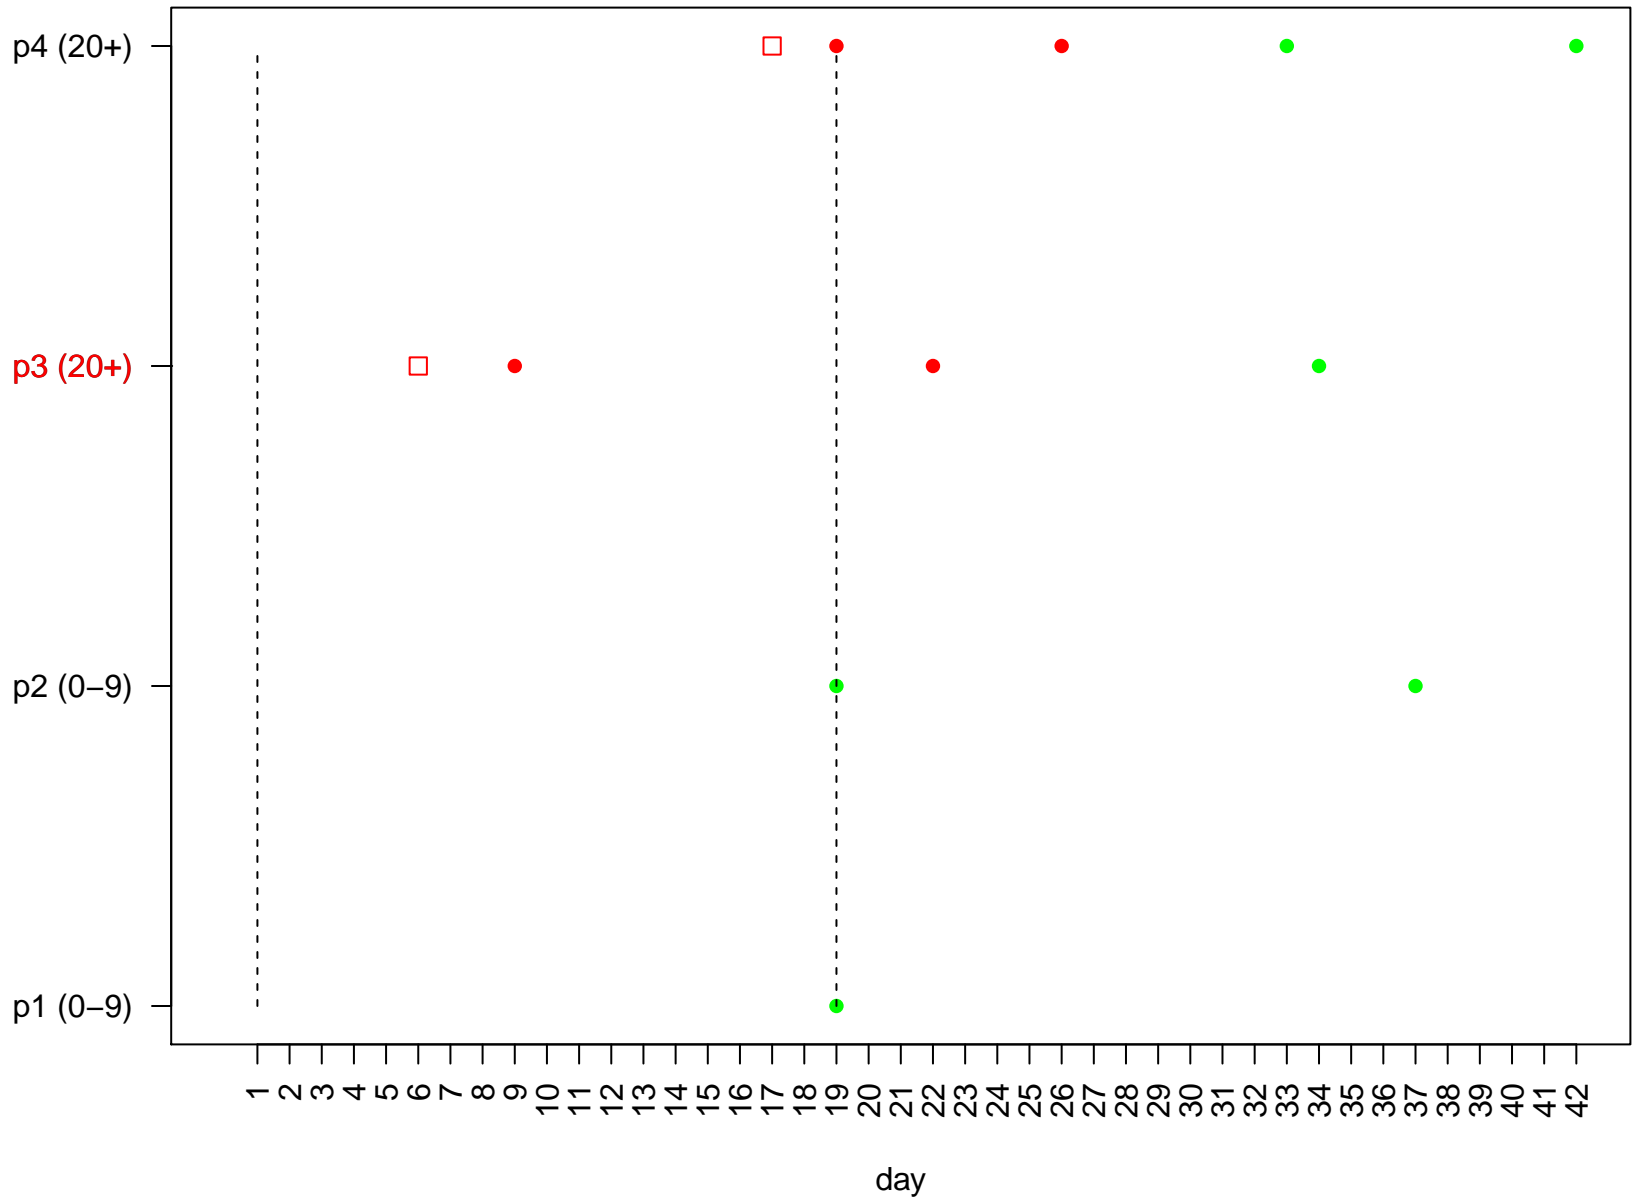

# Household 135

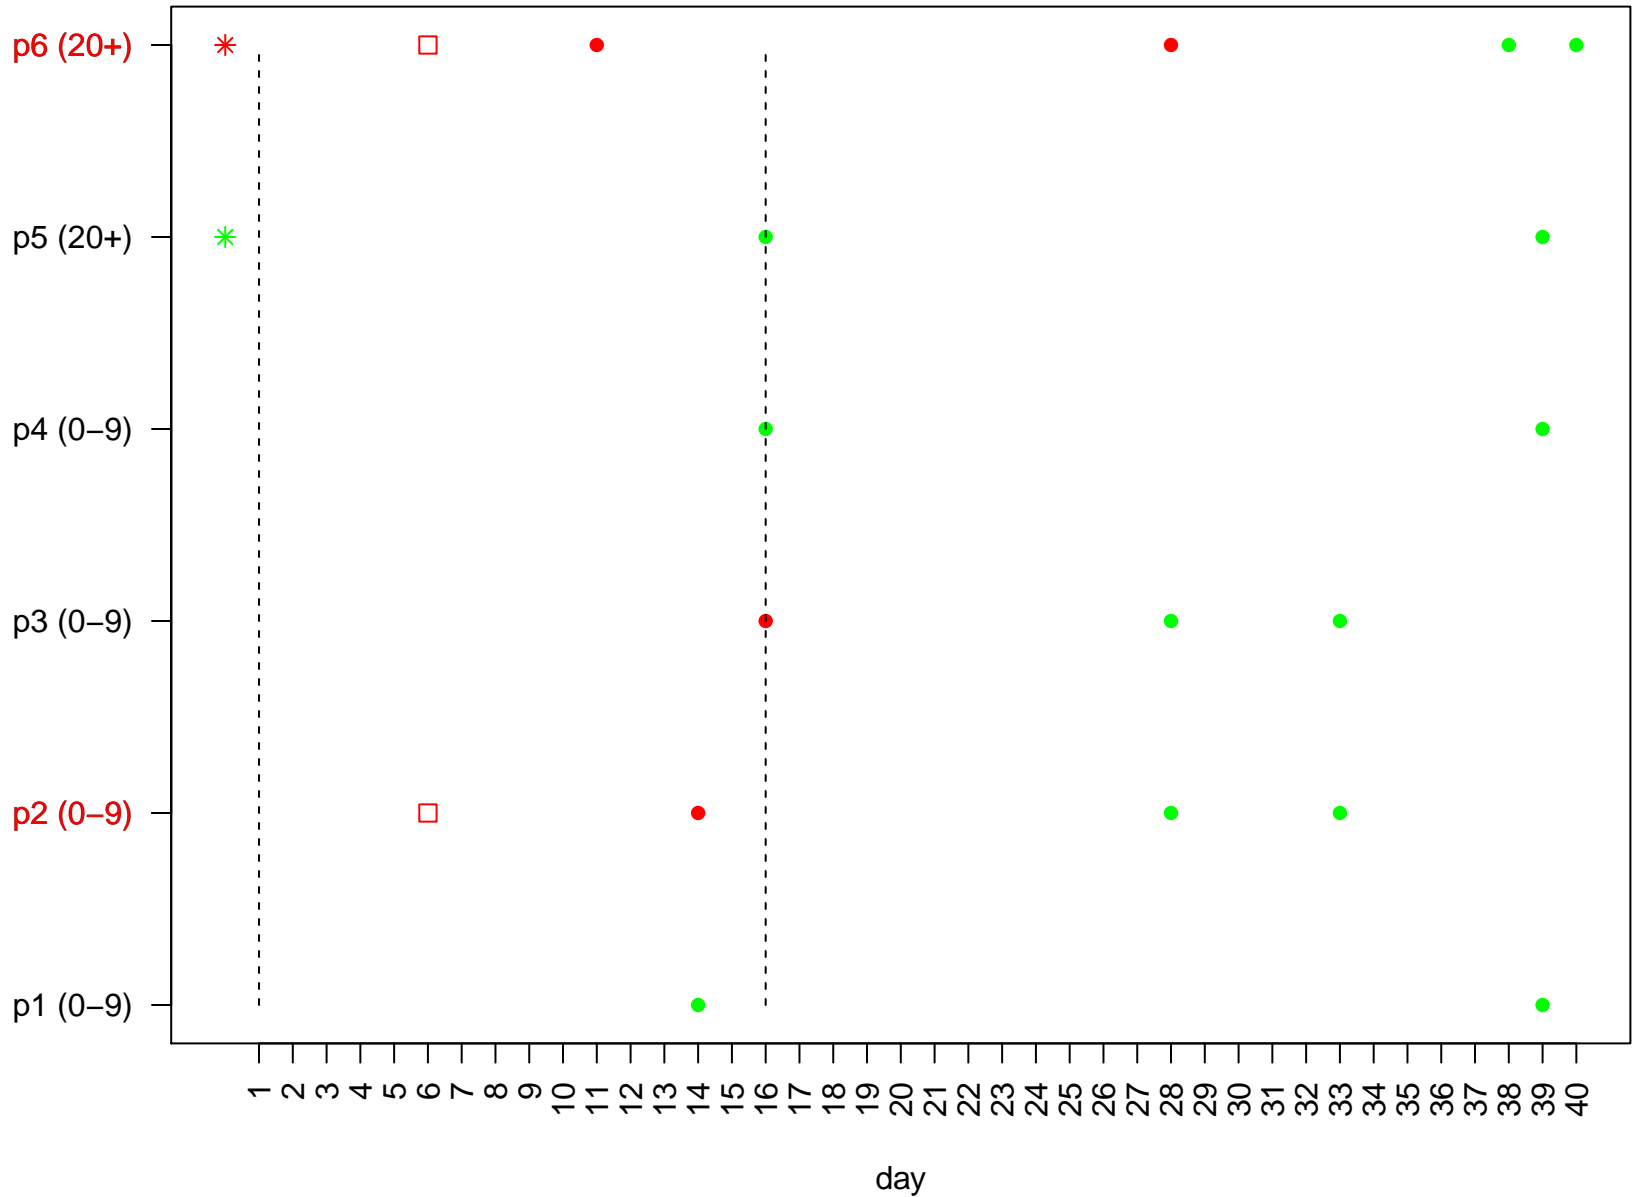



# Household 136

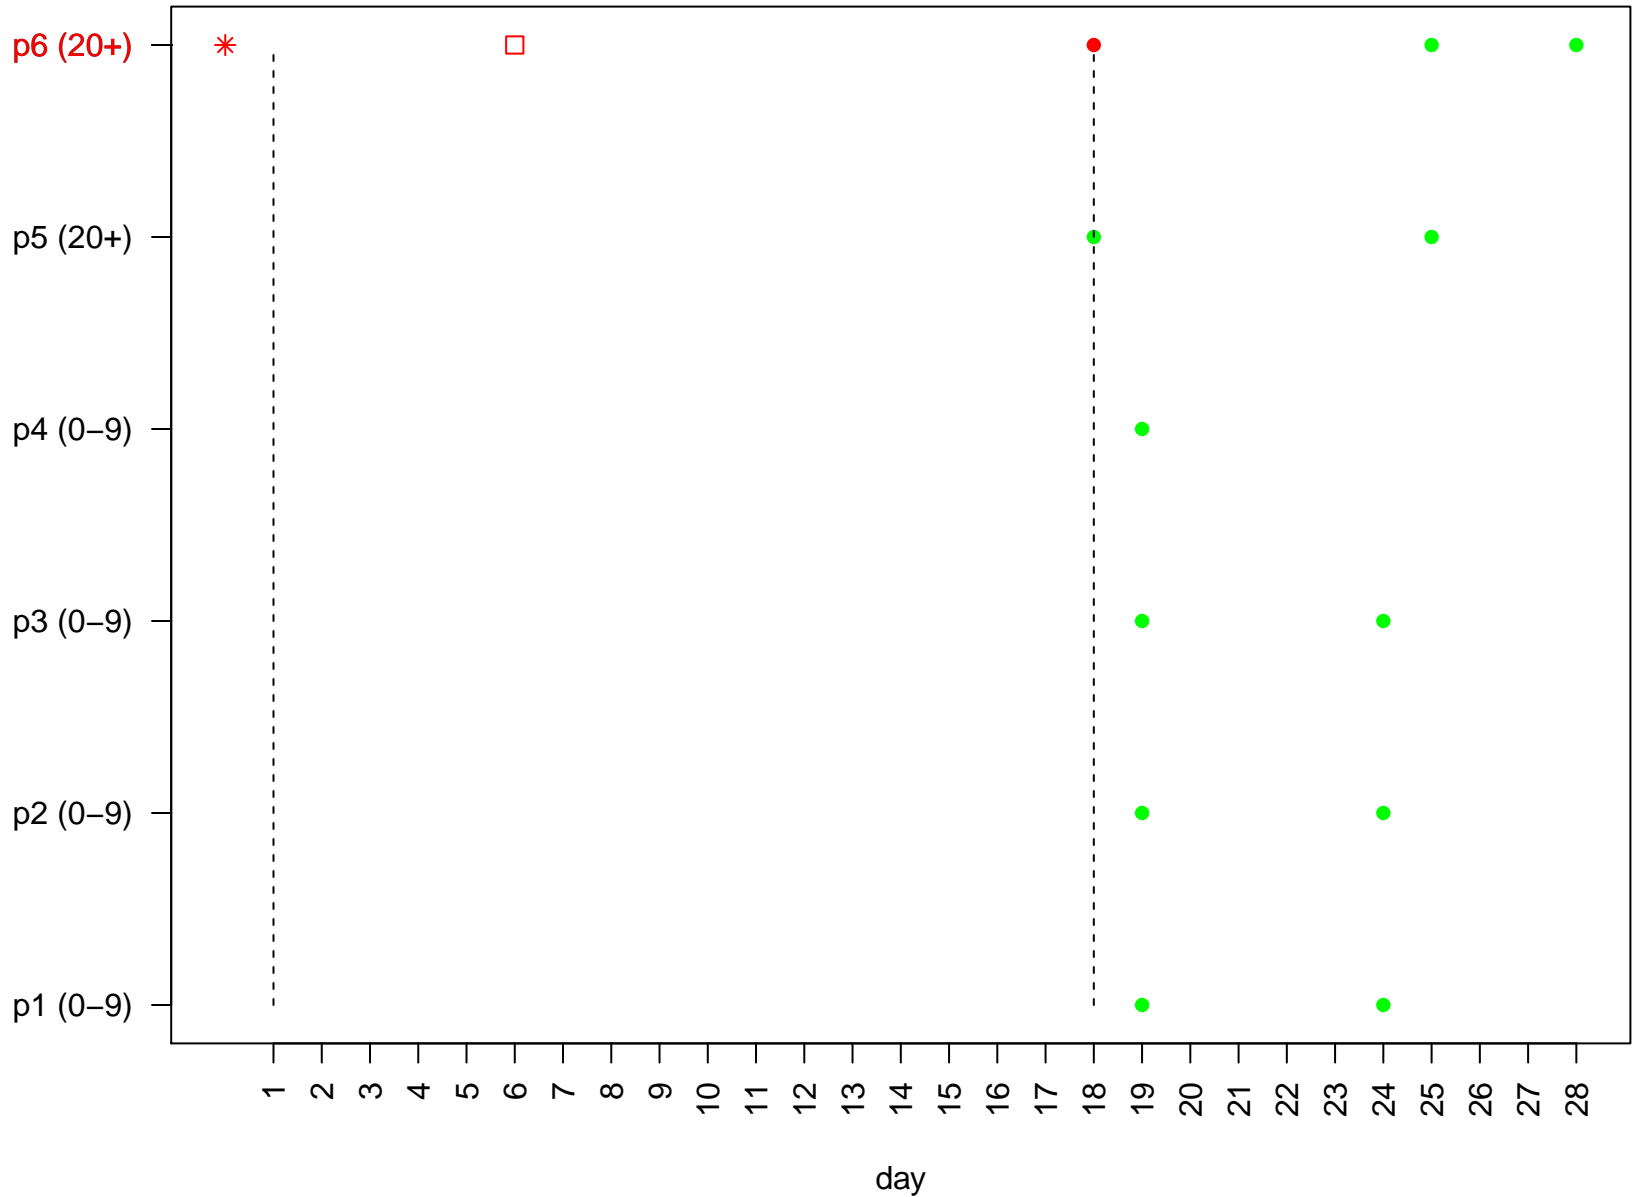

# Household 137

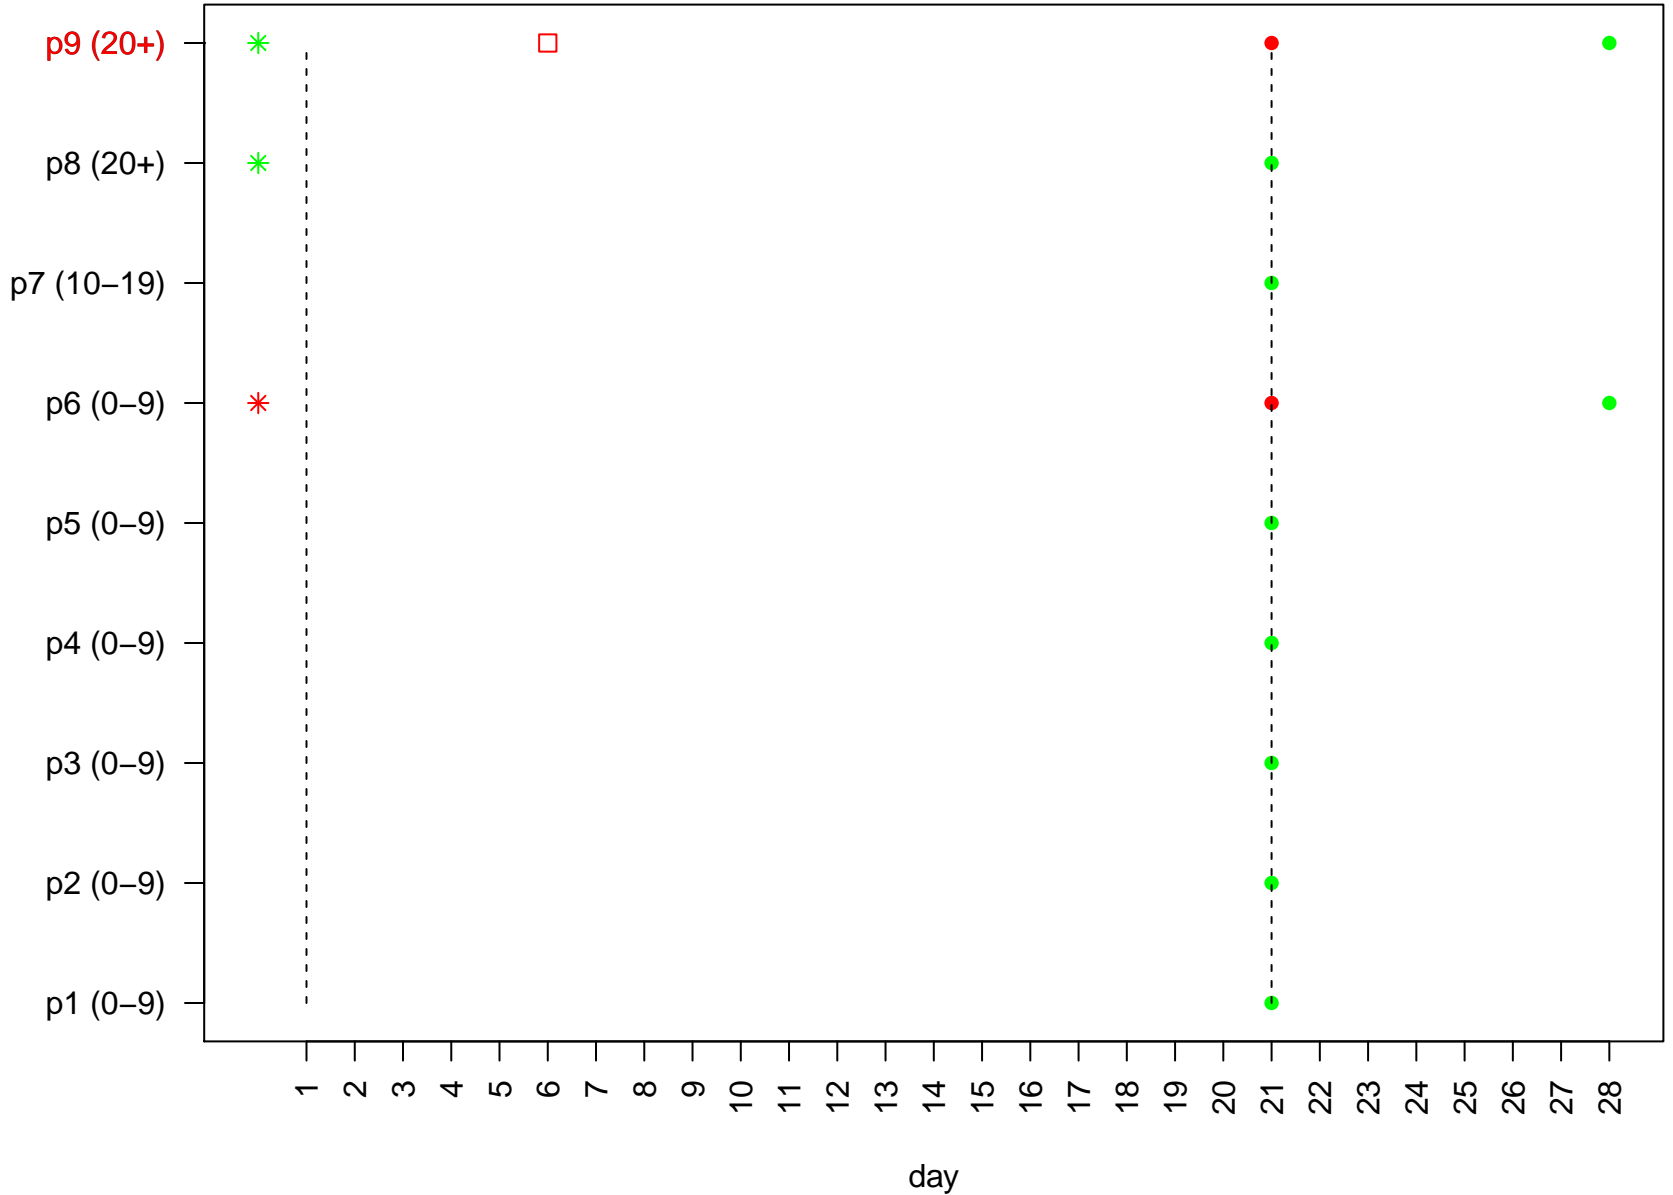

# Household 138

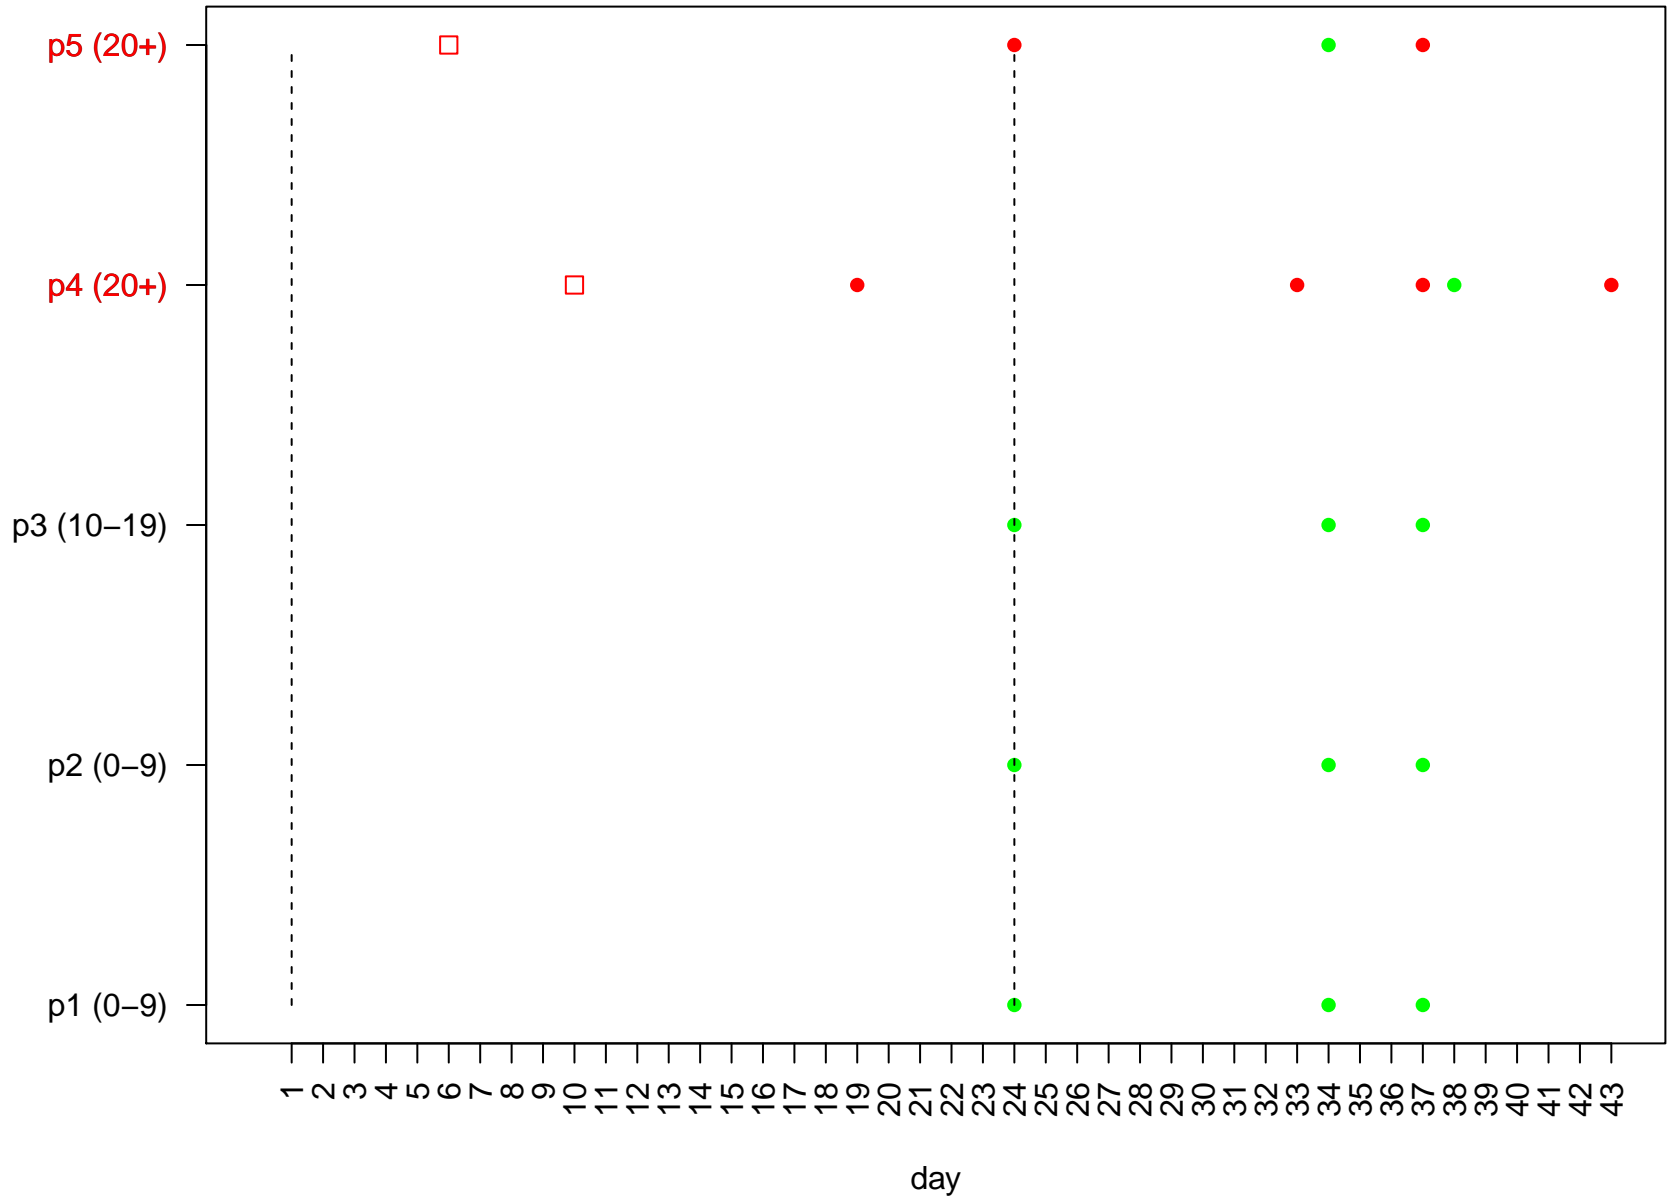



# Household 140

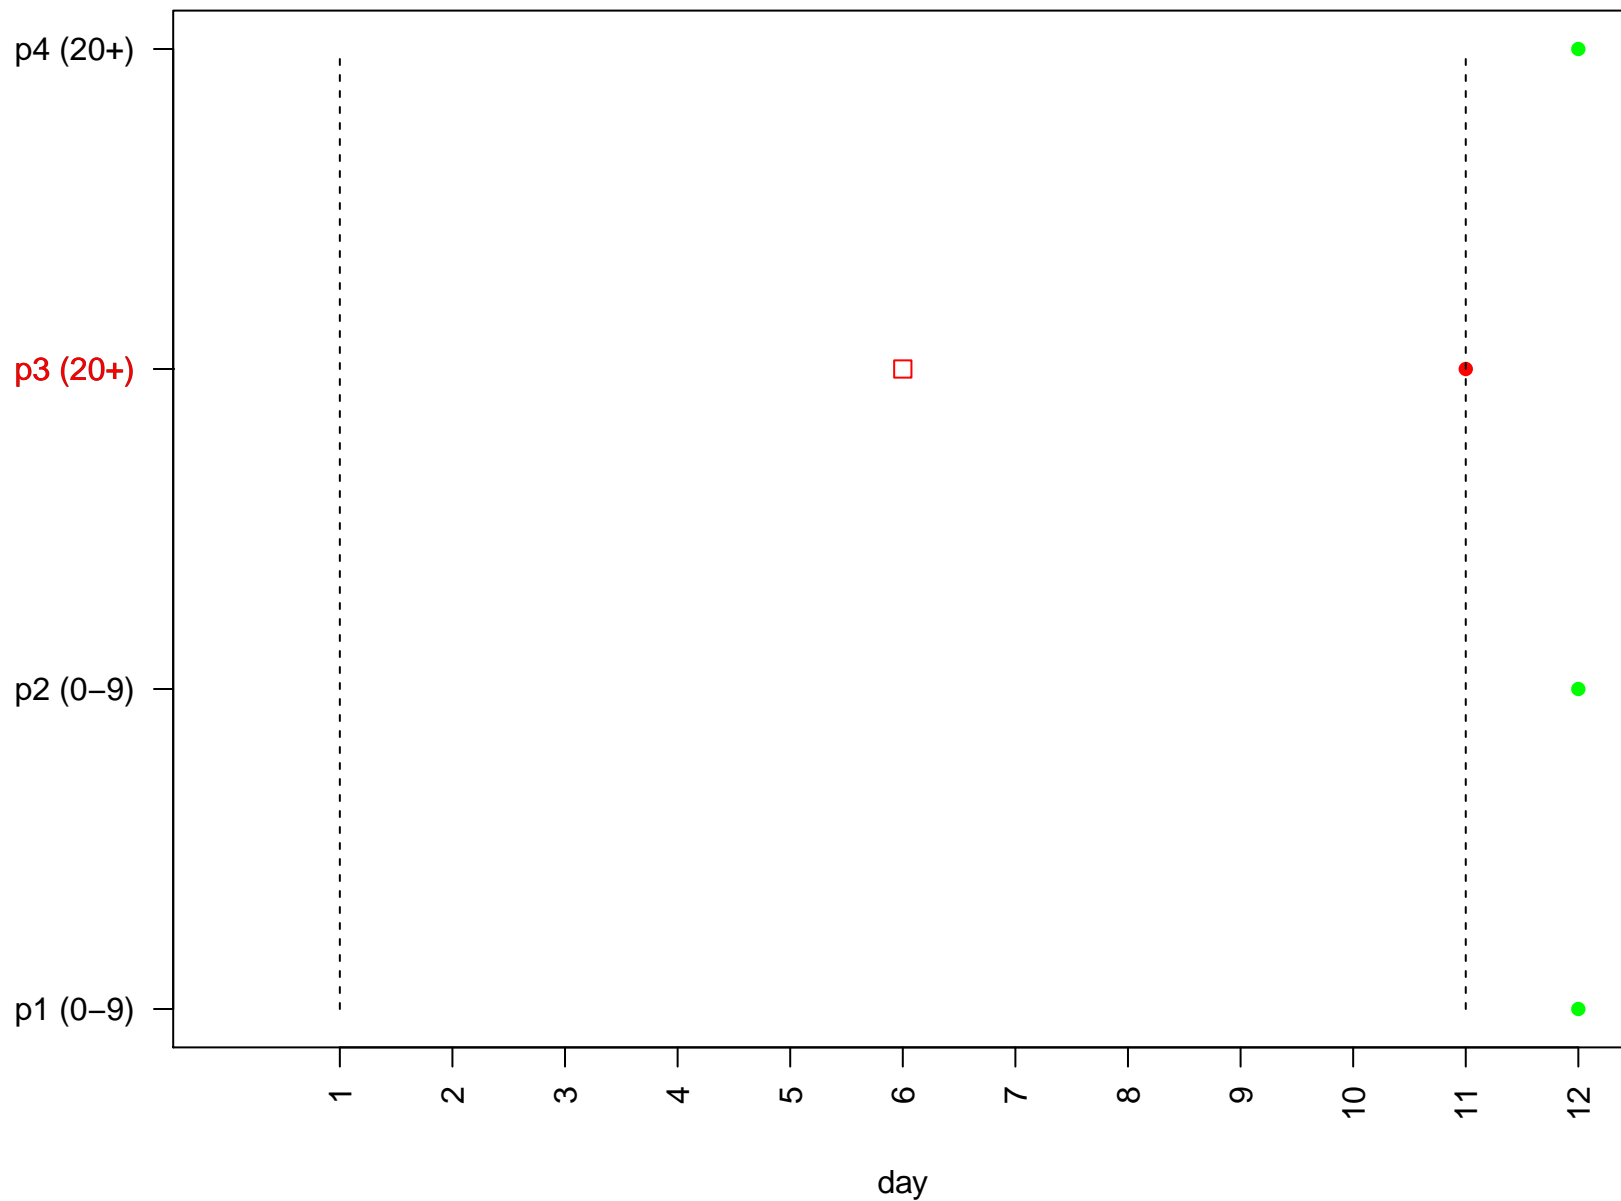

# Household 141

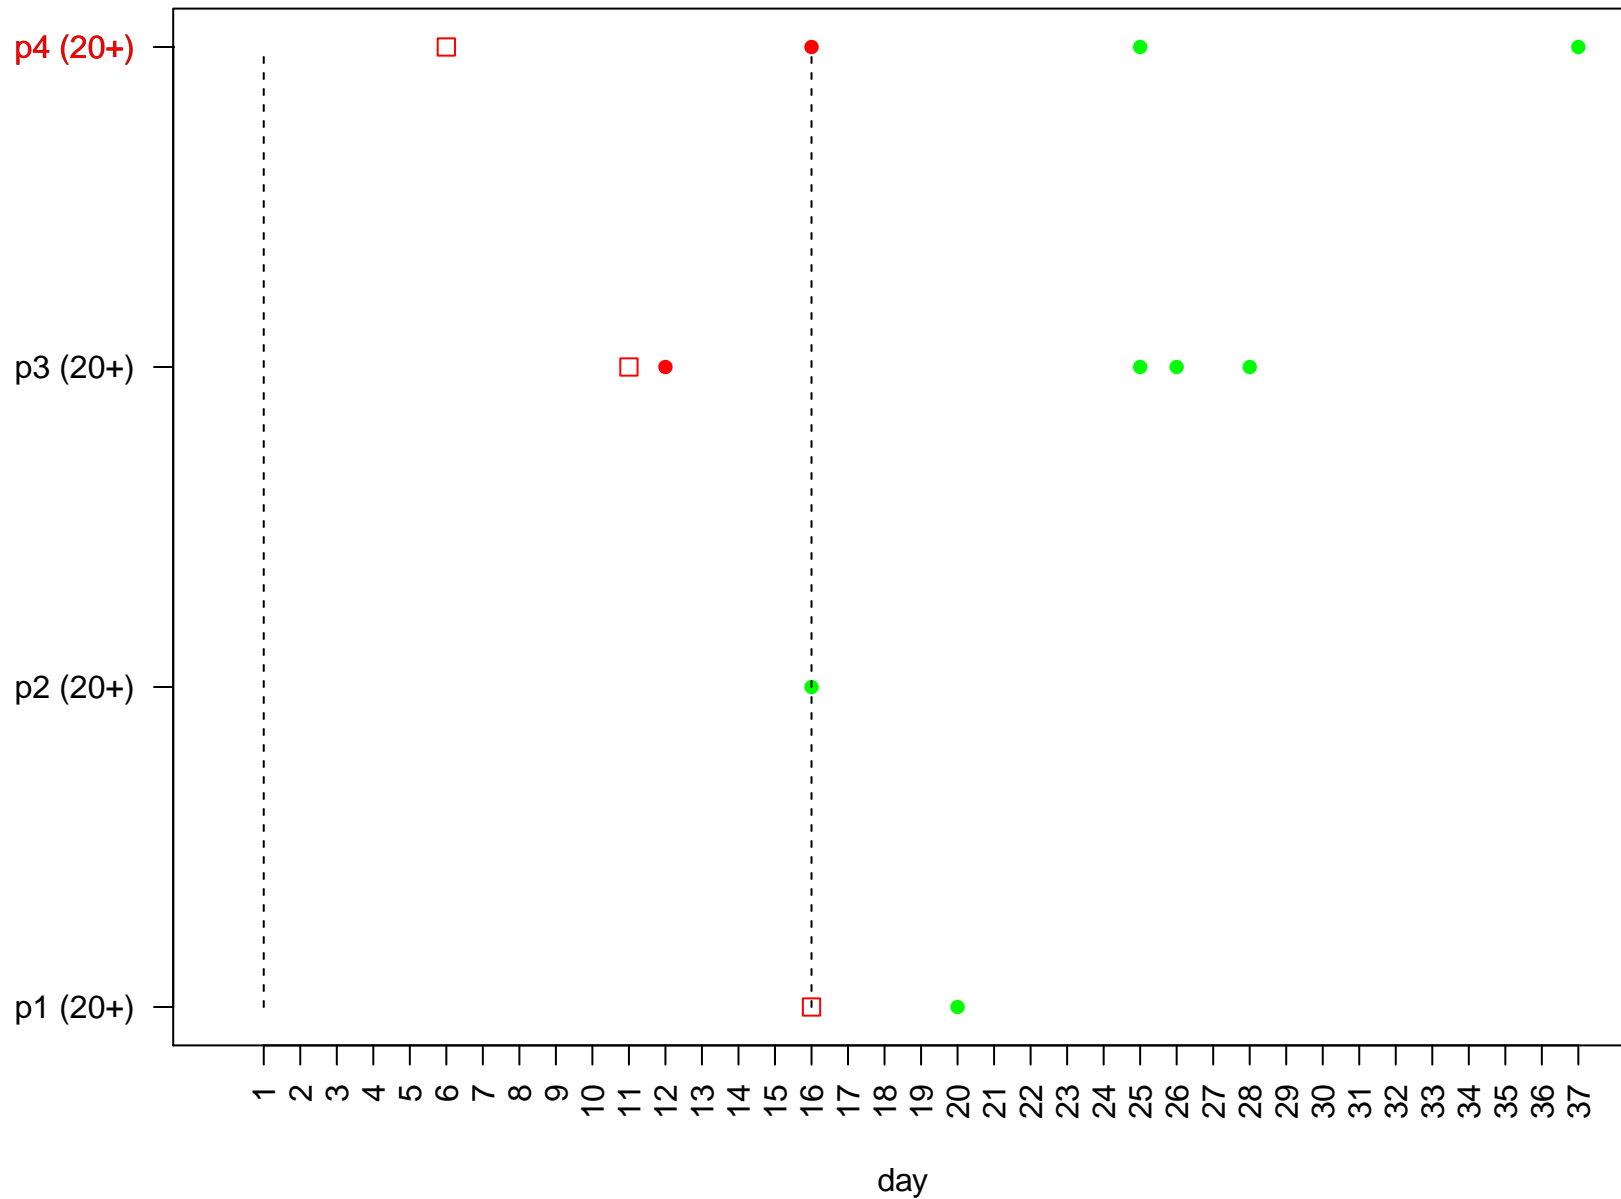

# Household 142

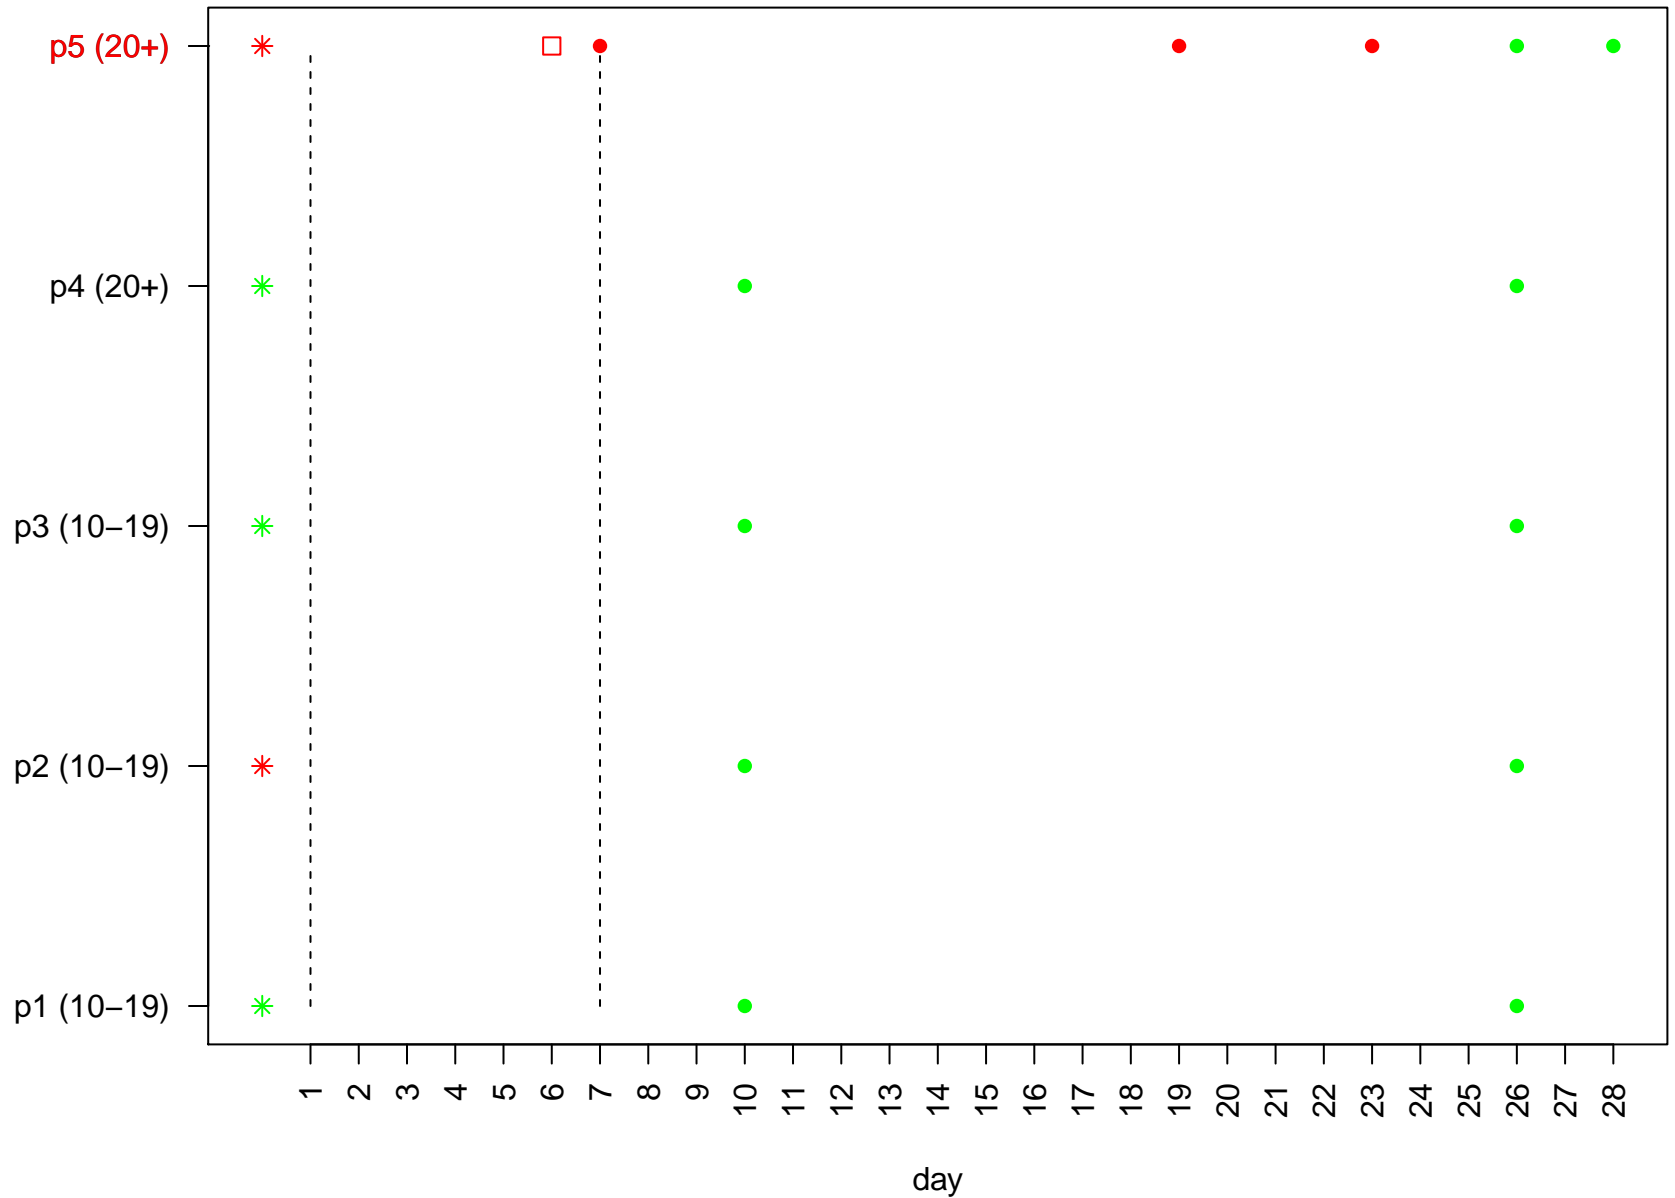

# Household 143

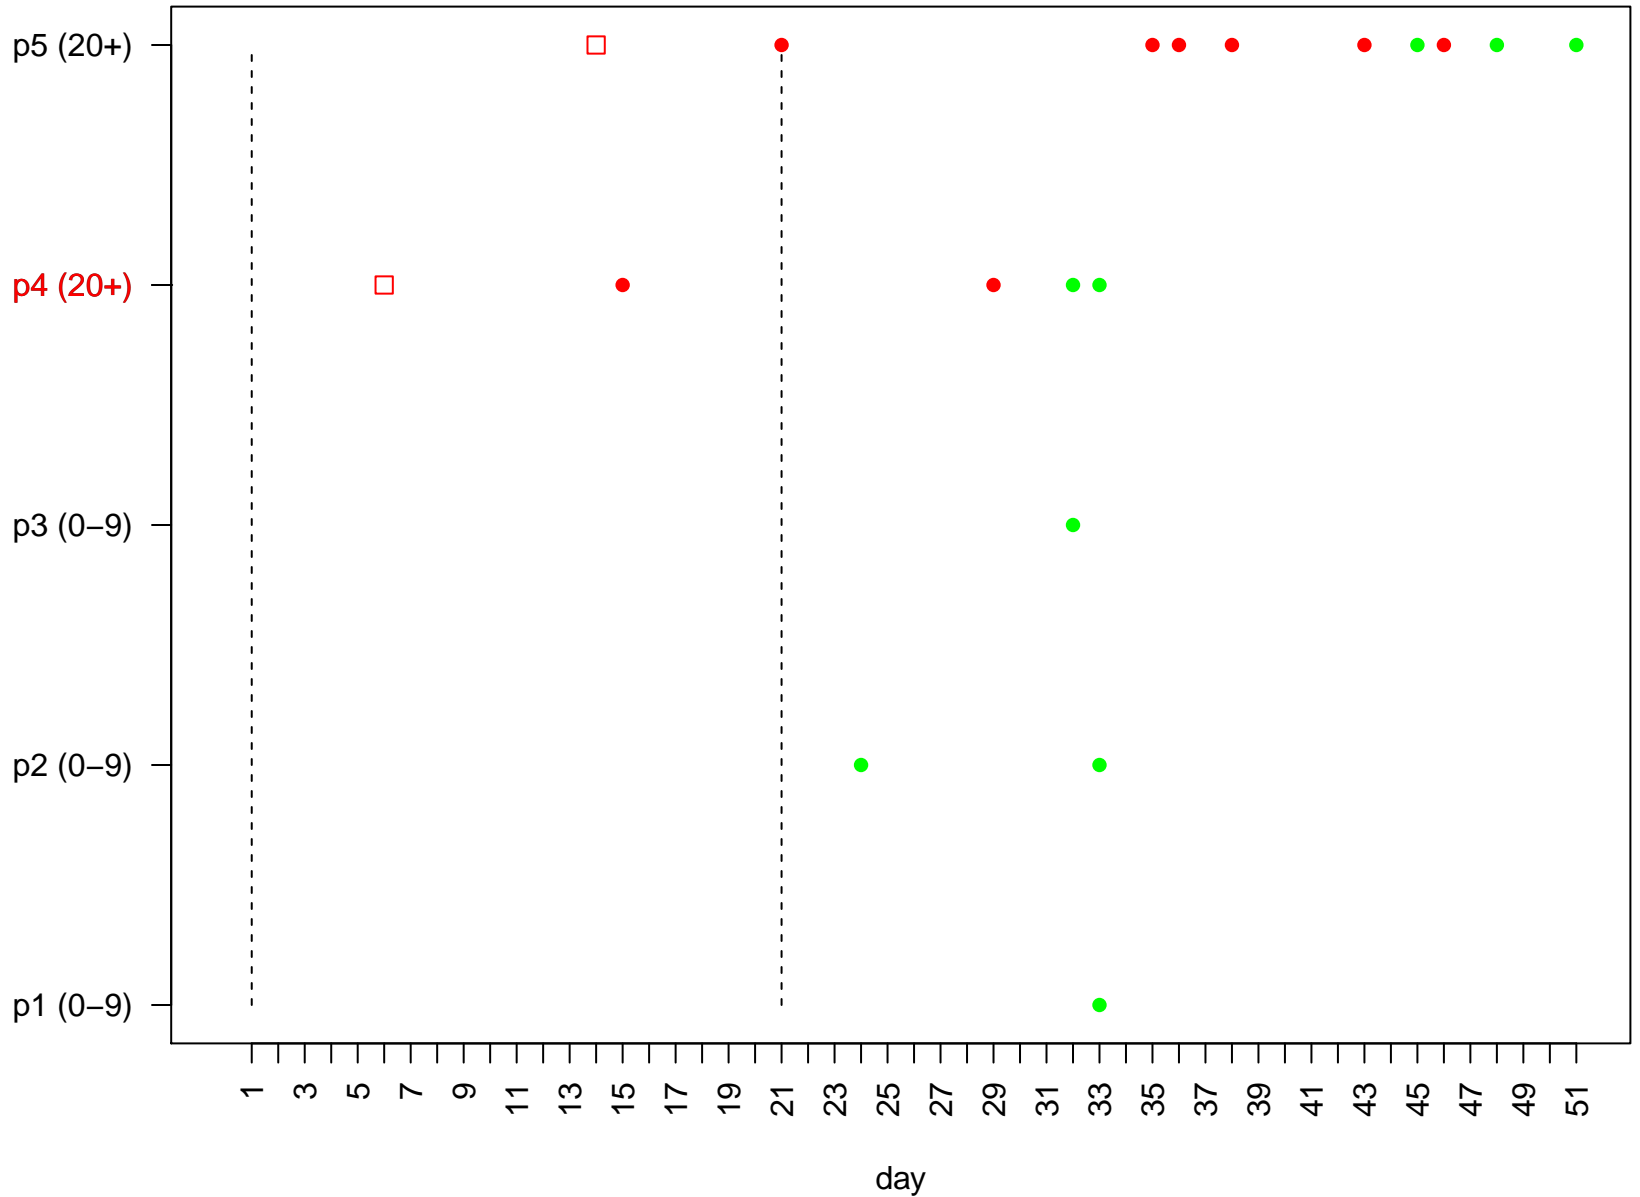



# Household 144

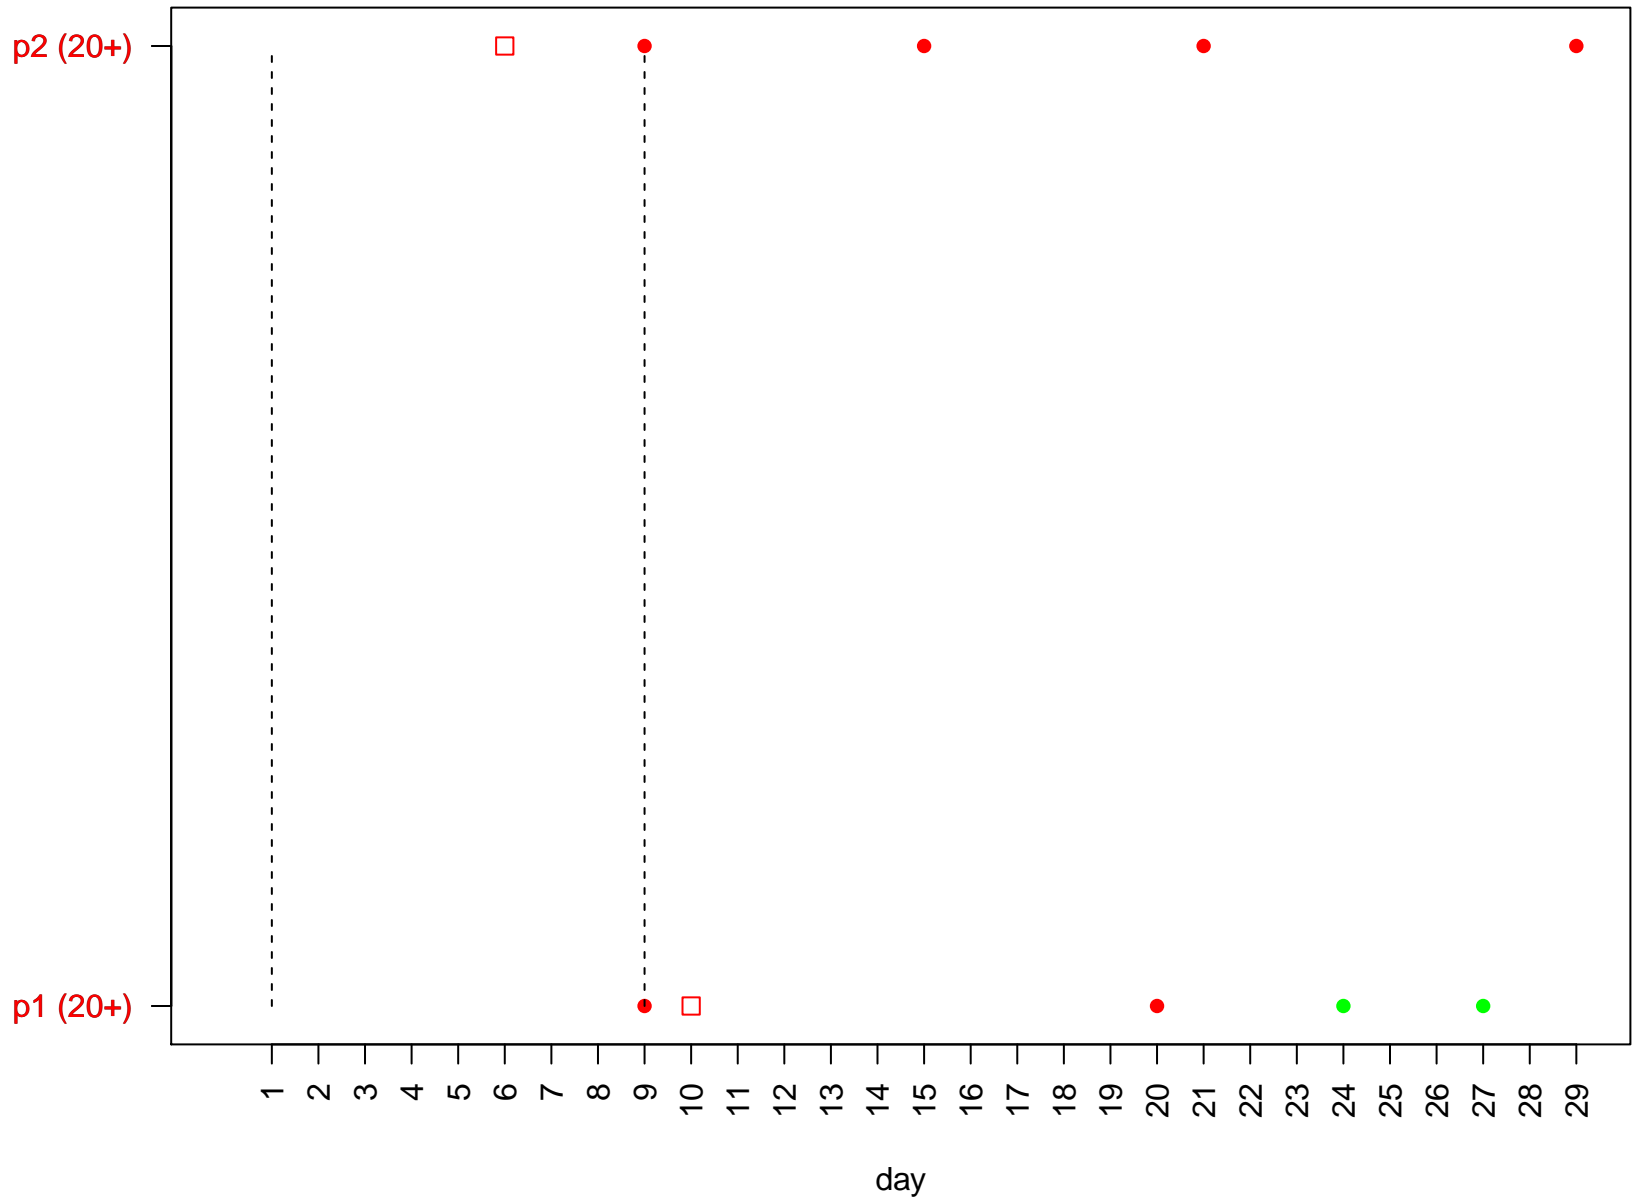

# Household 145

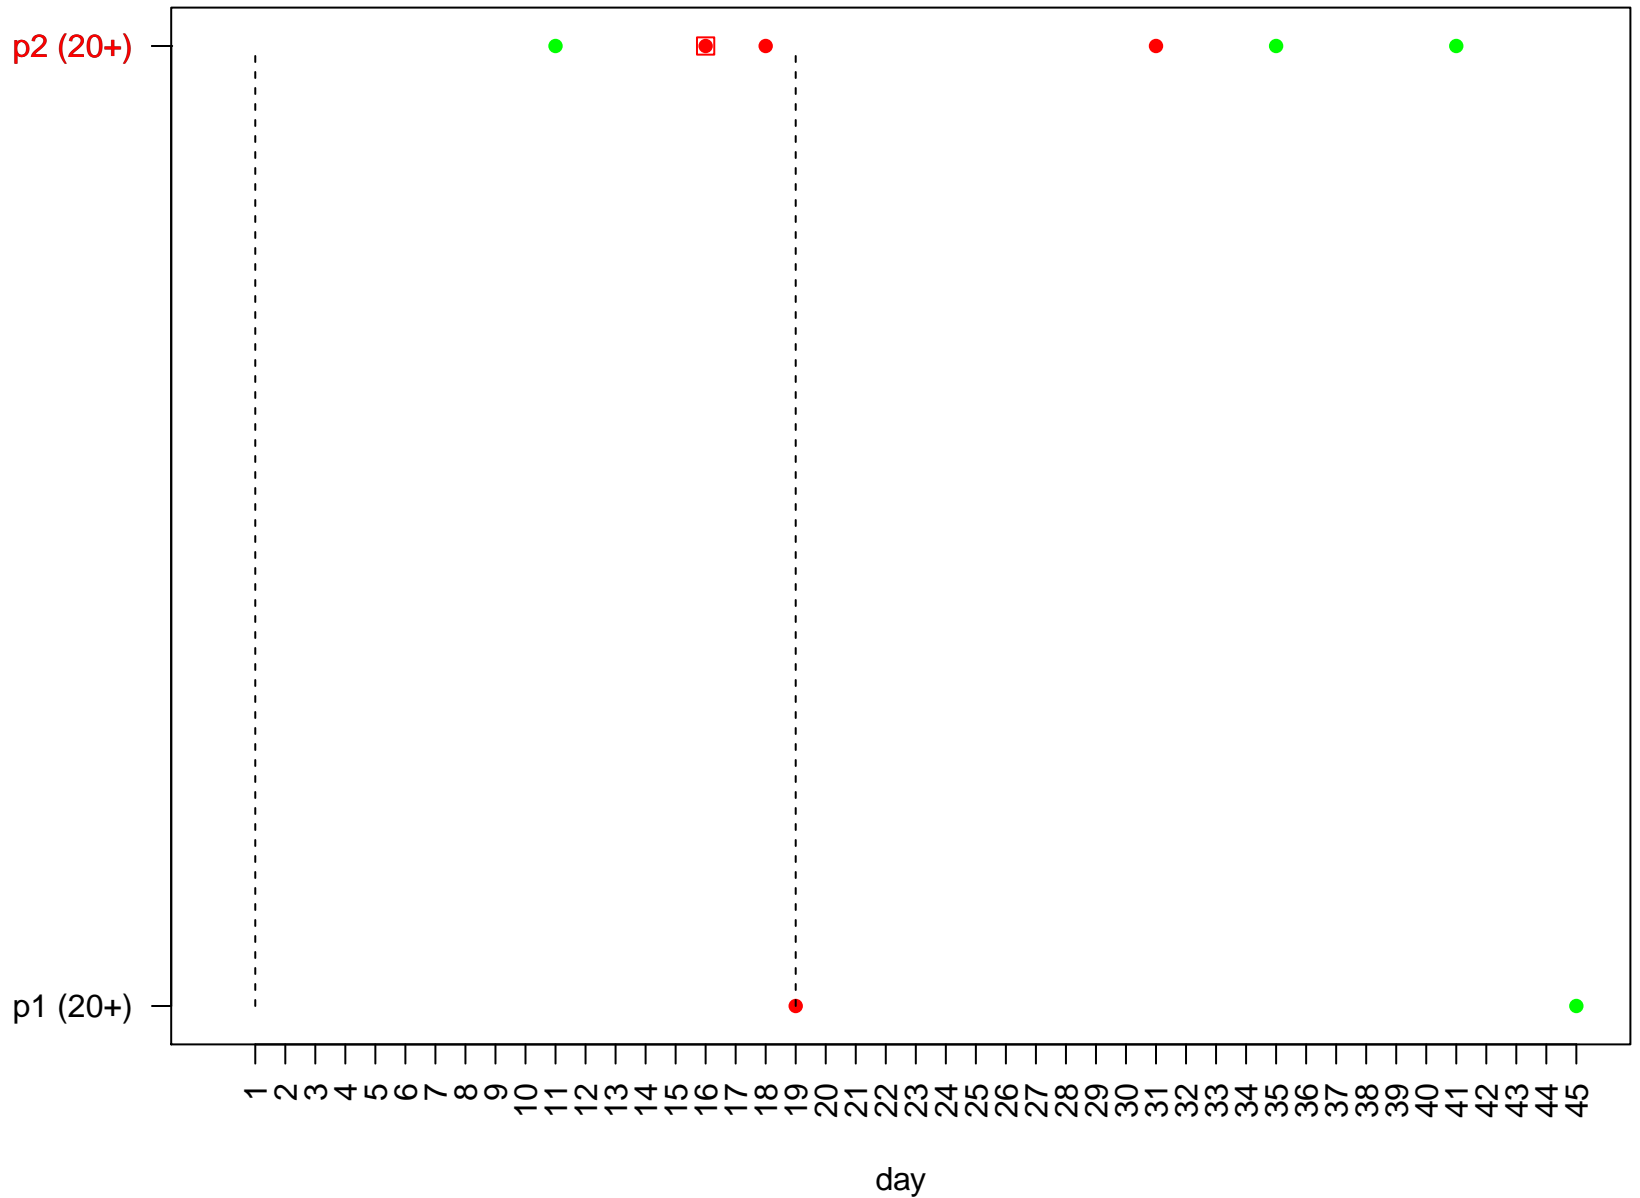

# Household 146

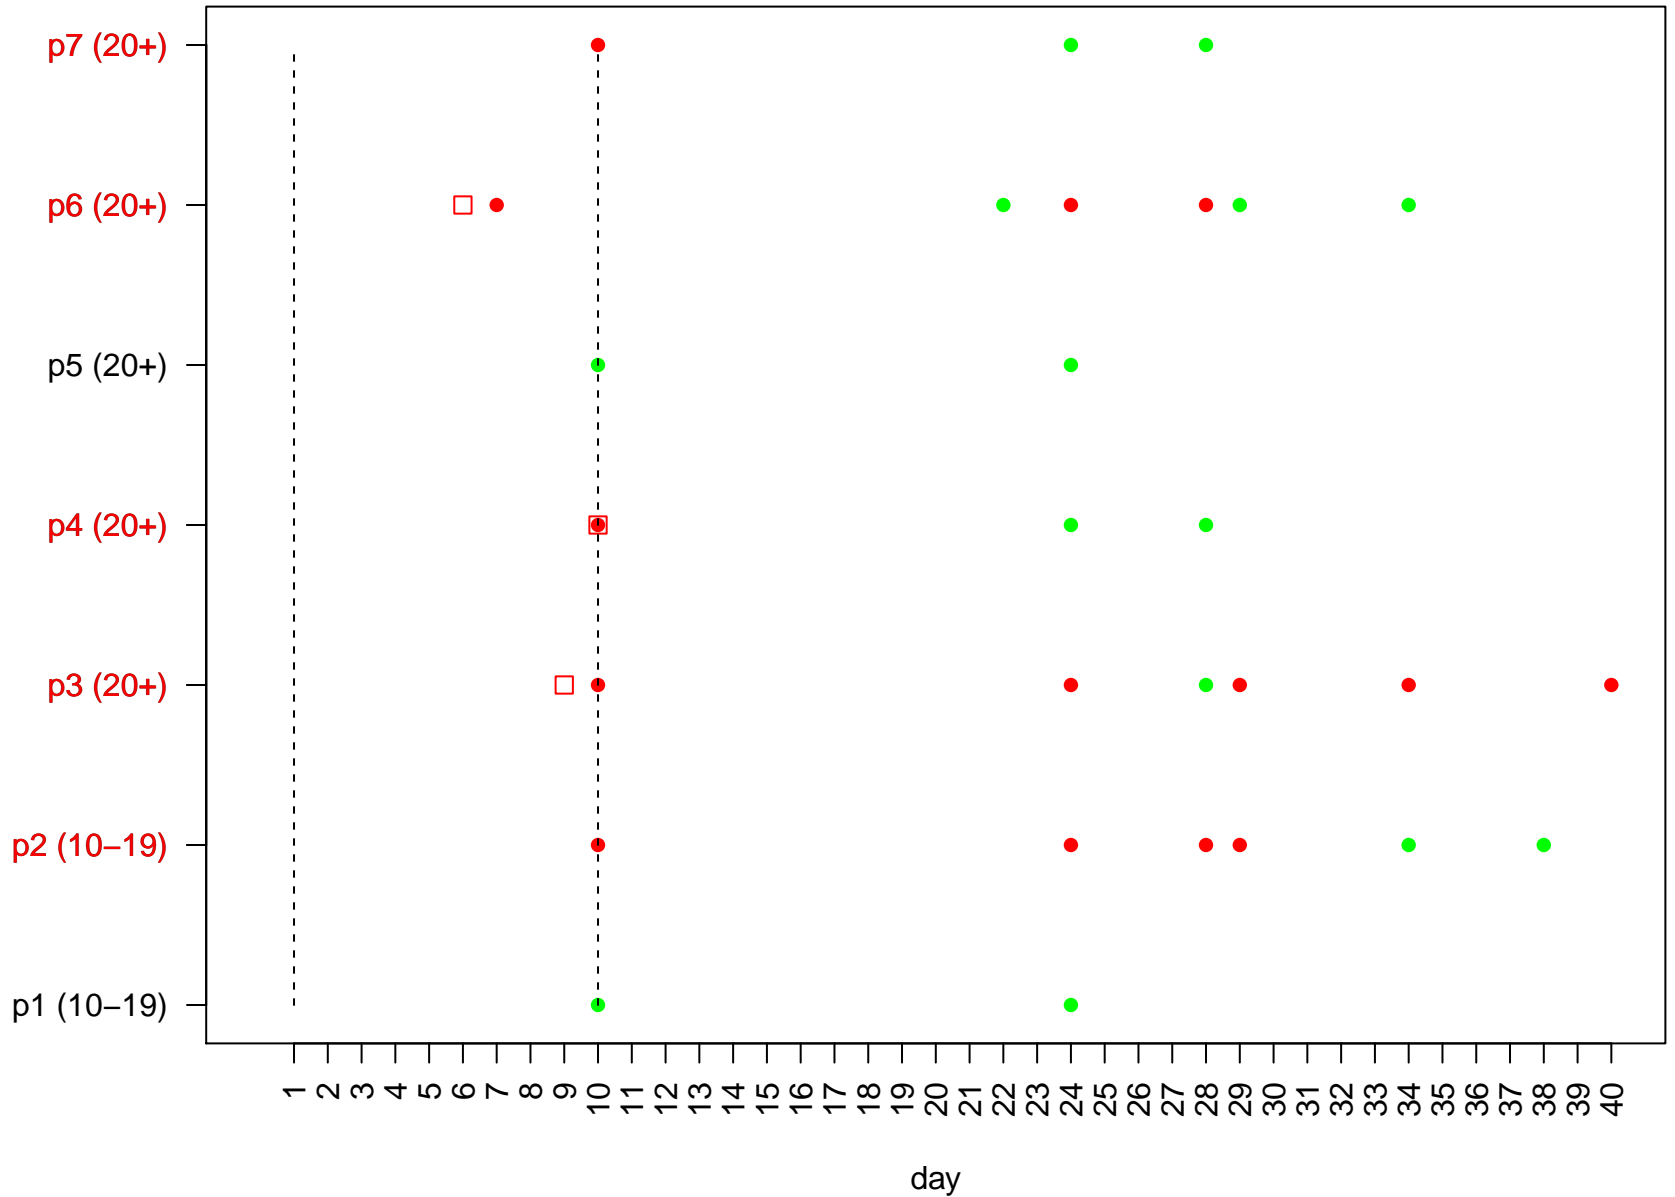

# Household 147

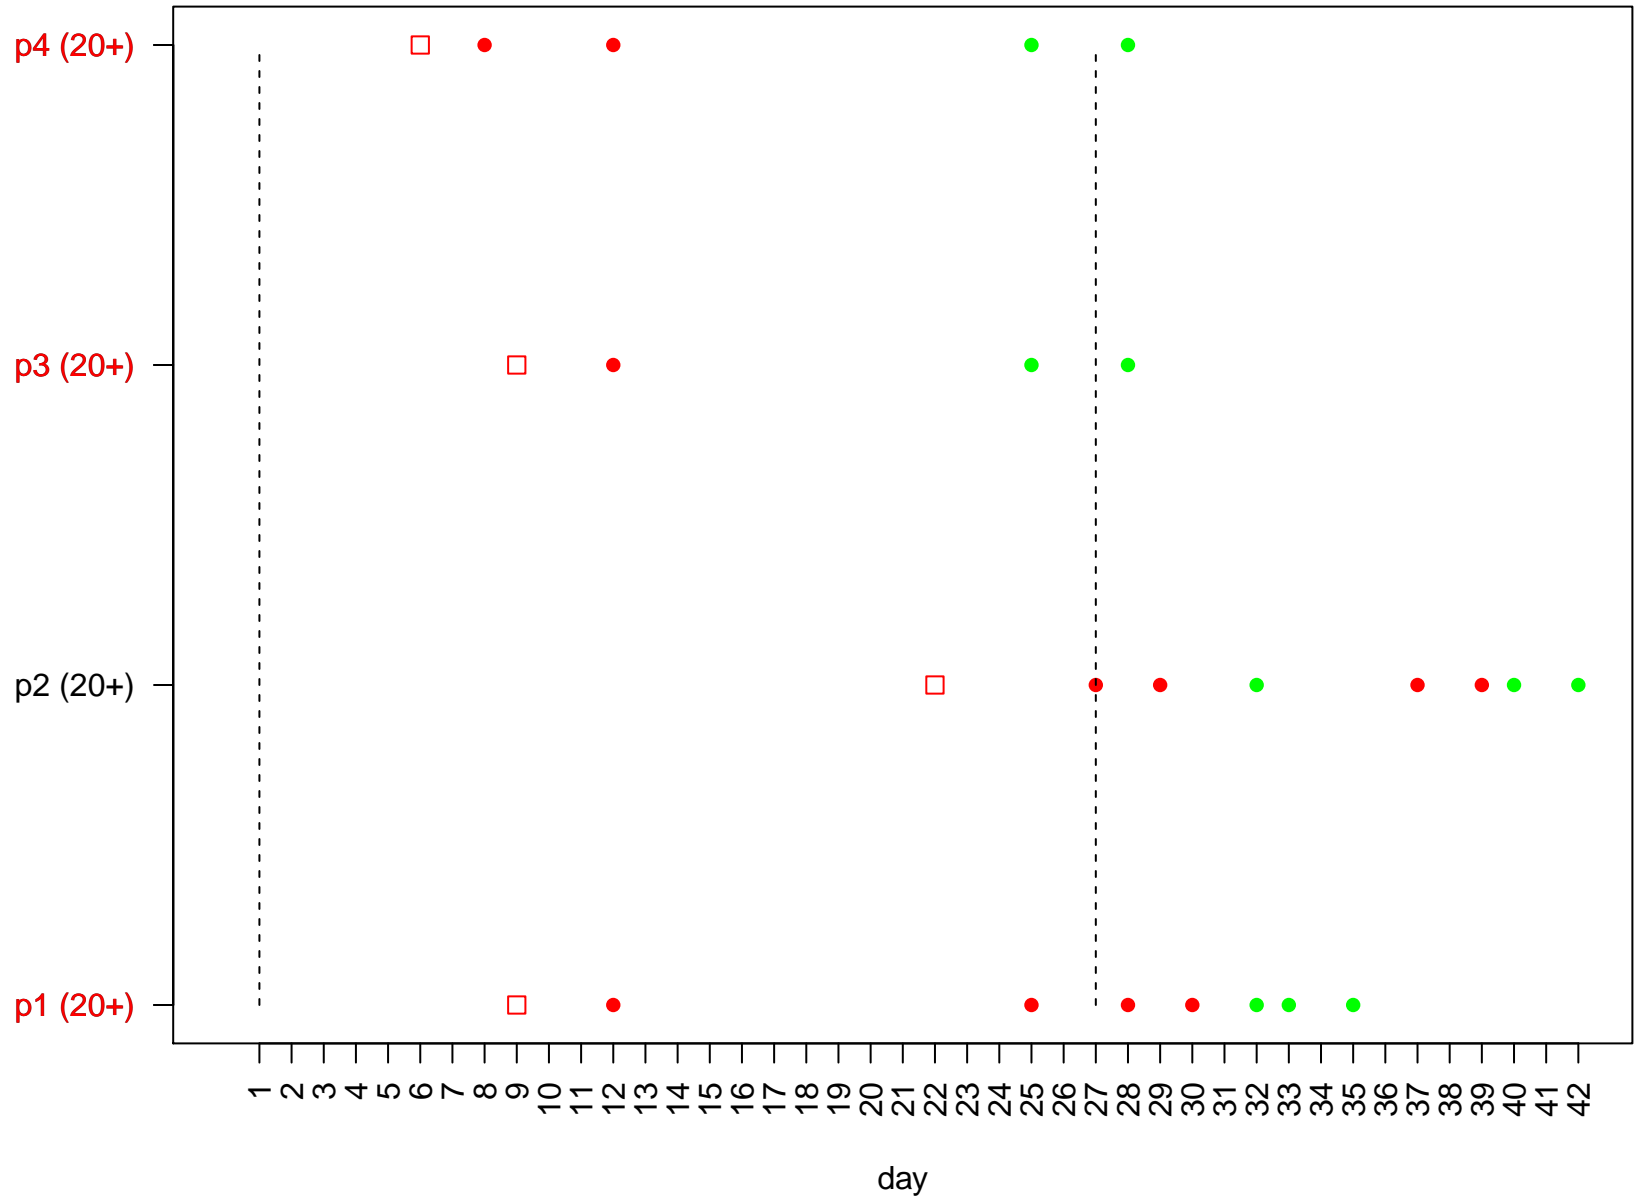

# Household 148

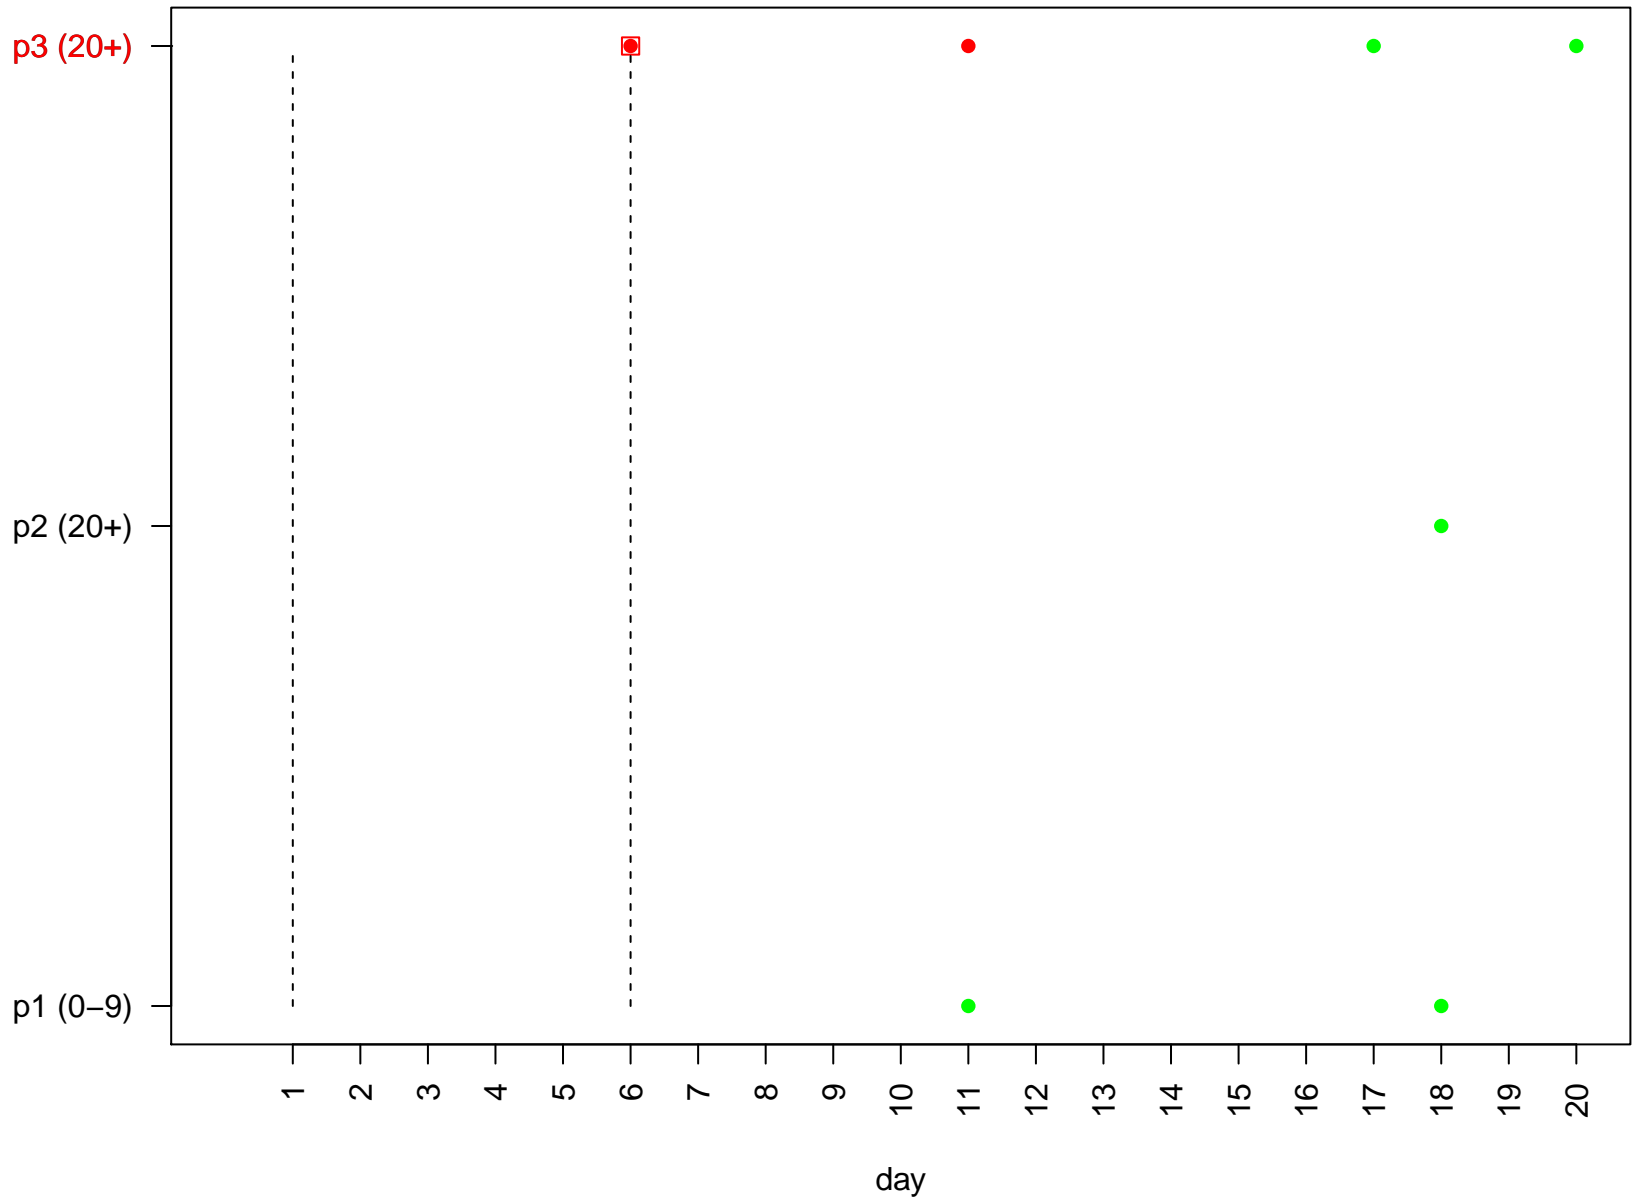

# Household 149

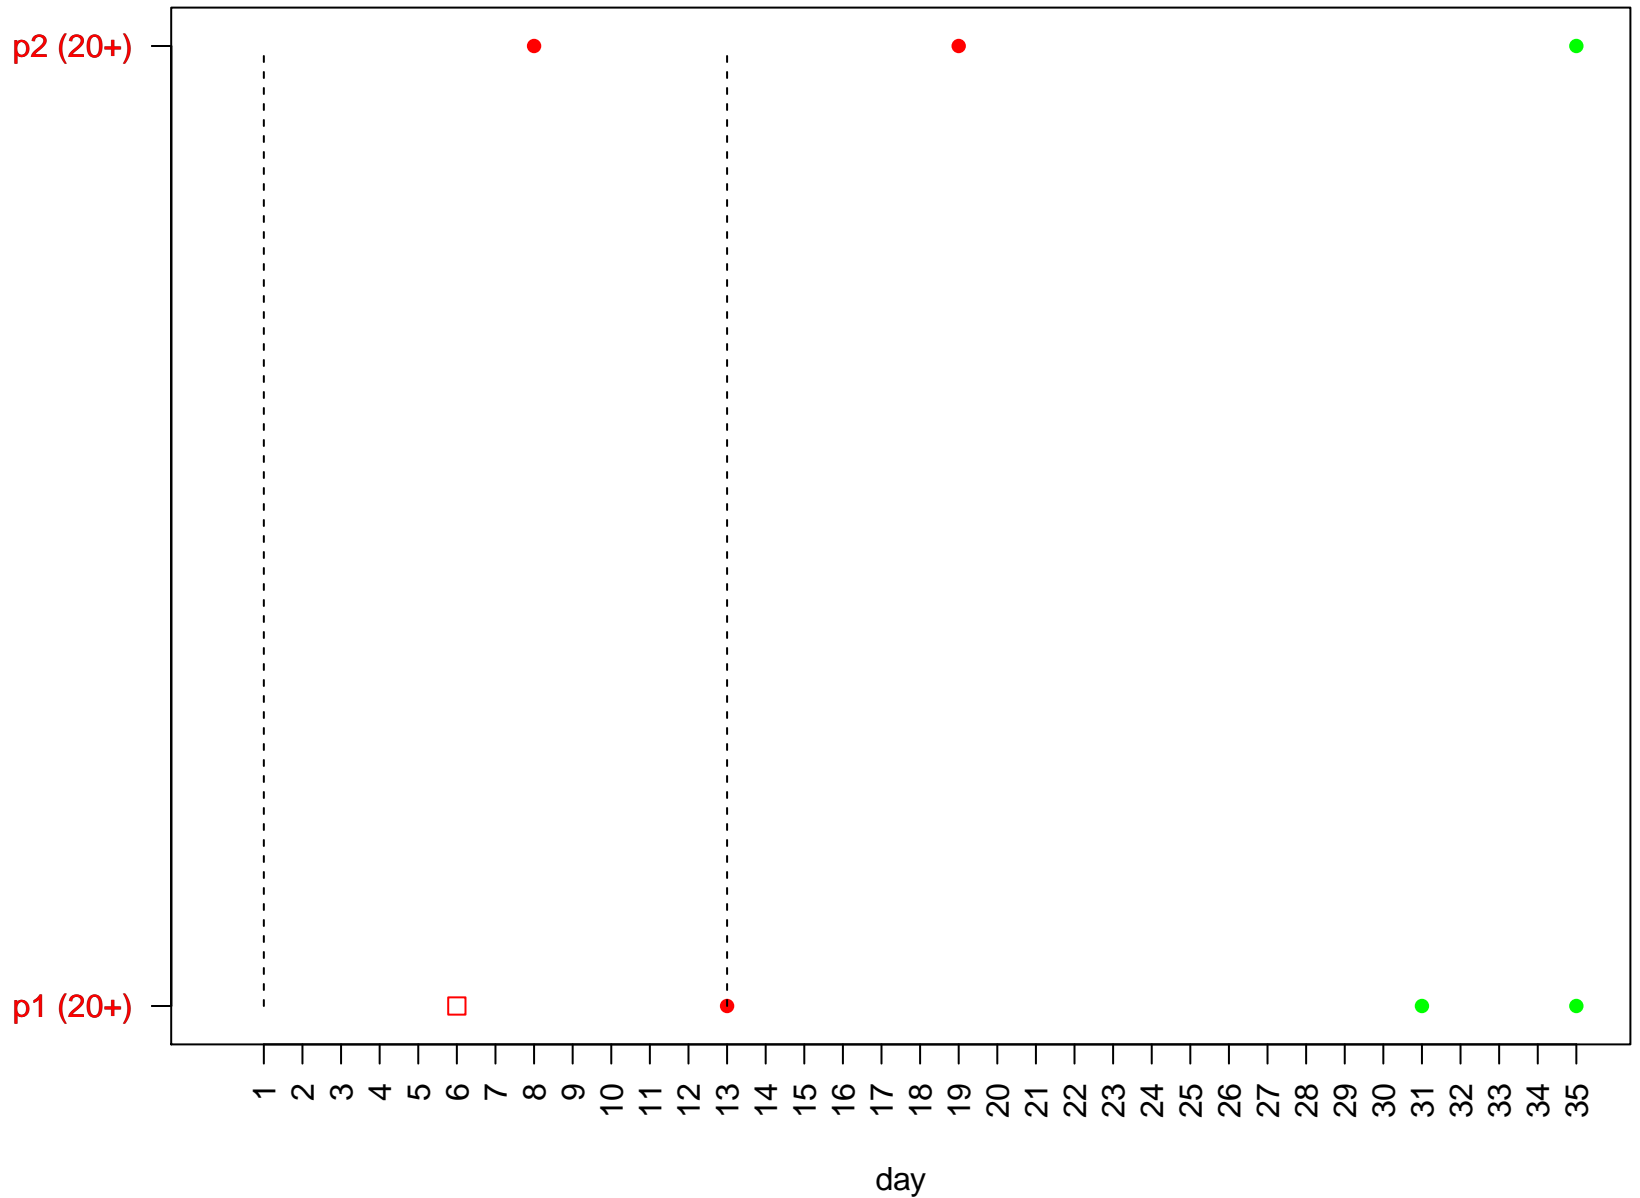

# Household 150

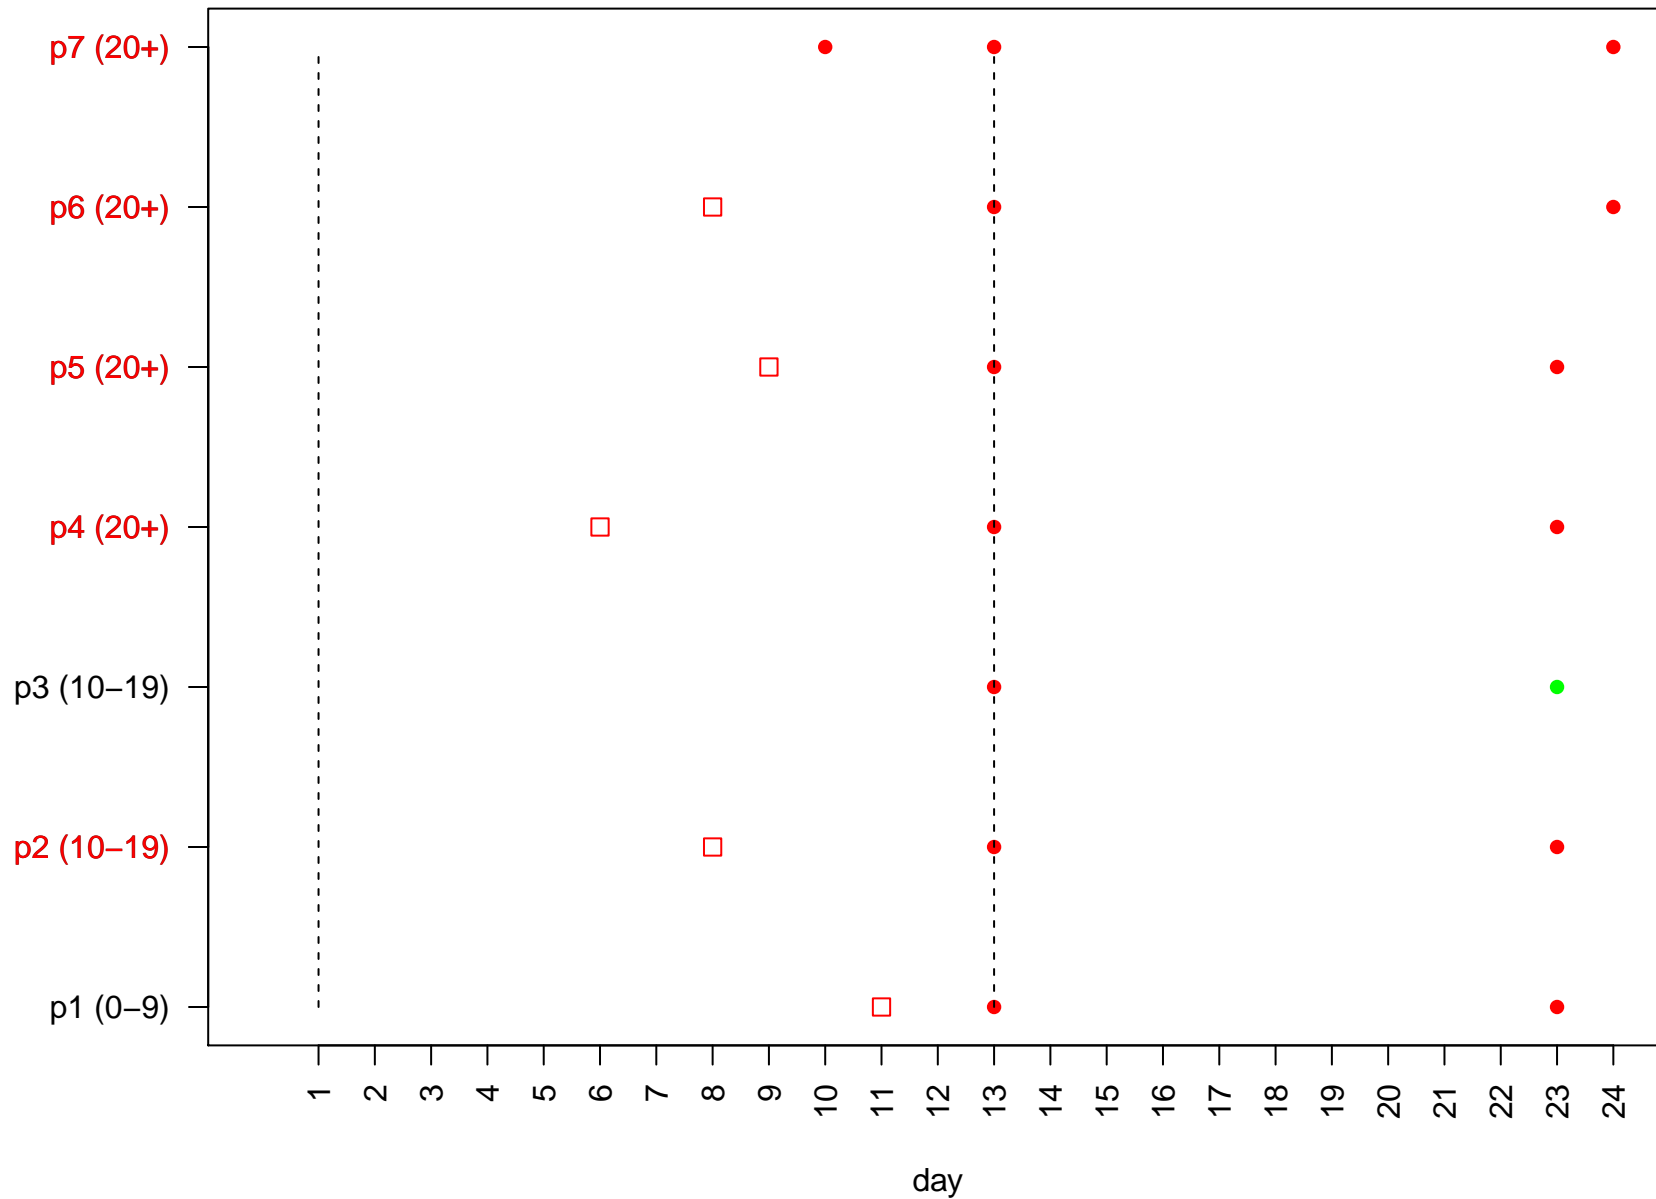

# Household 151

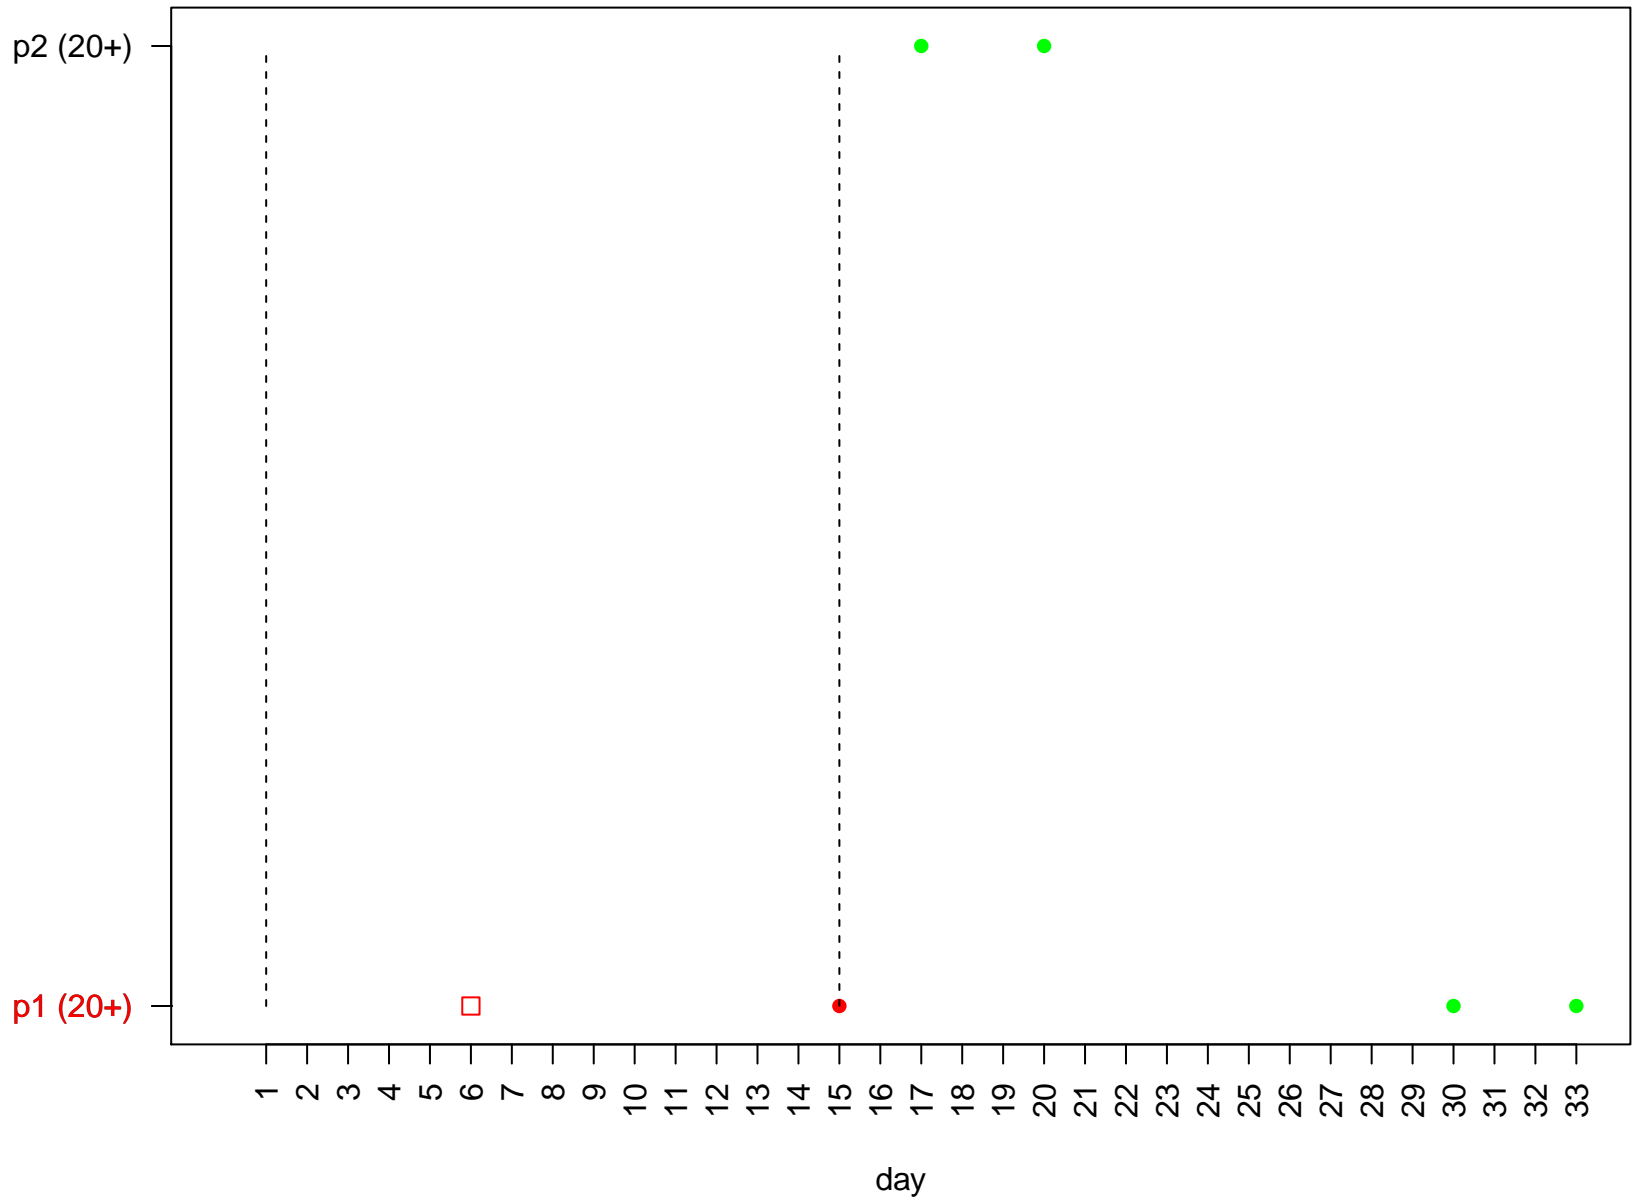



# Household 152

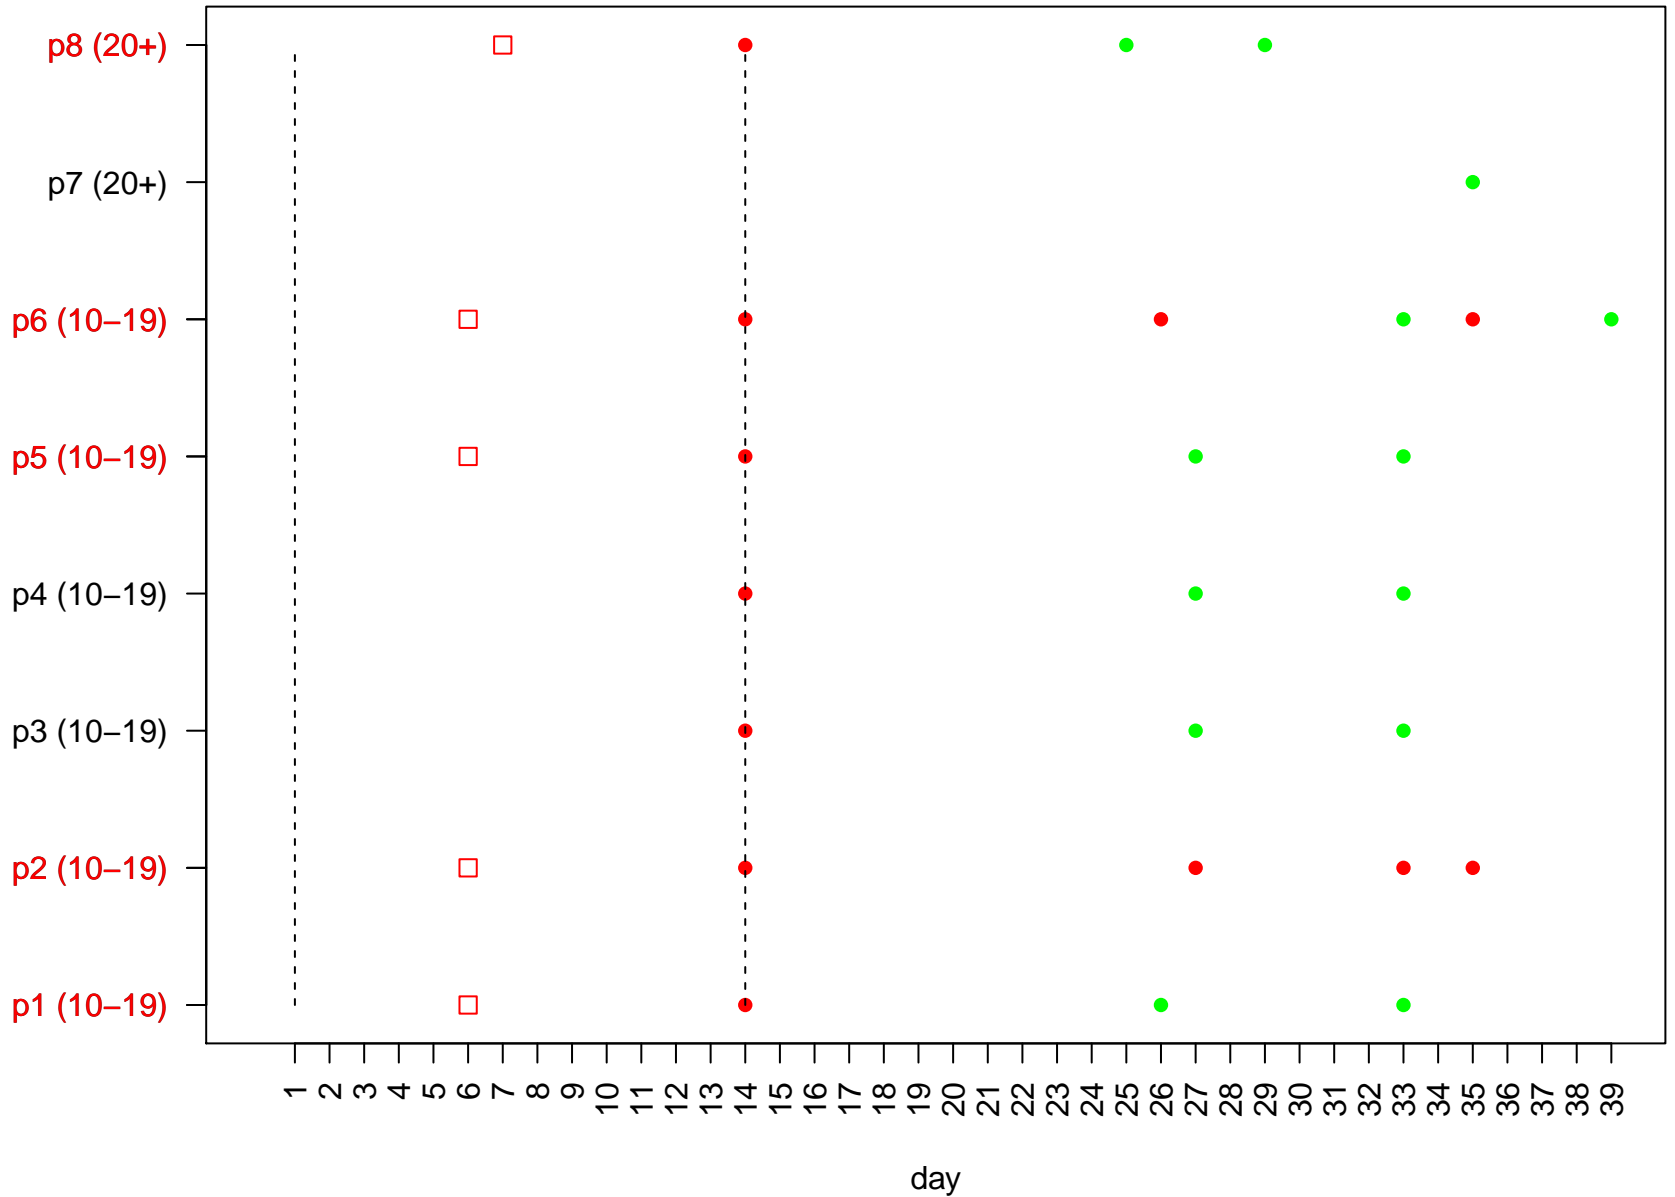

# Household 153

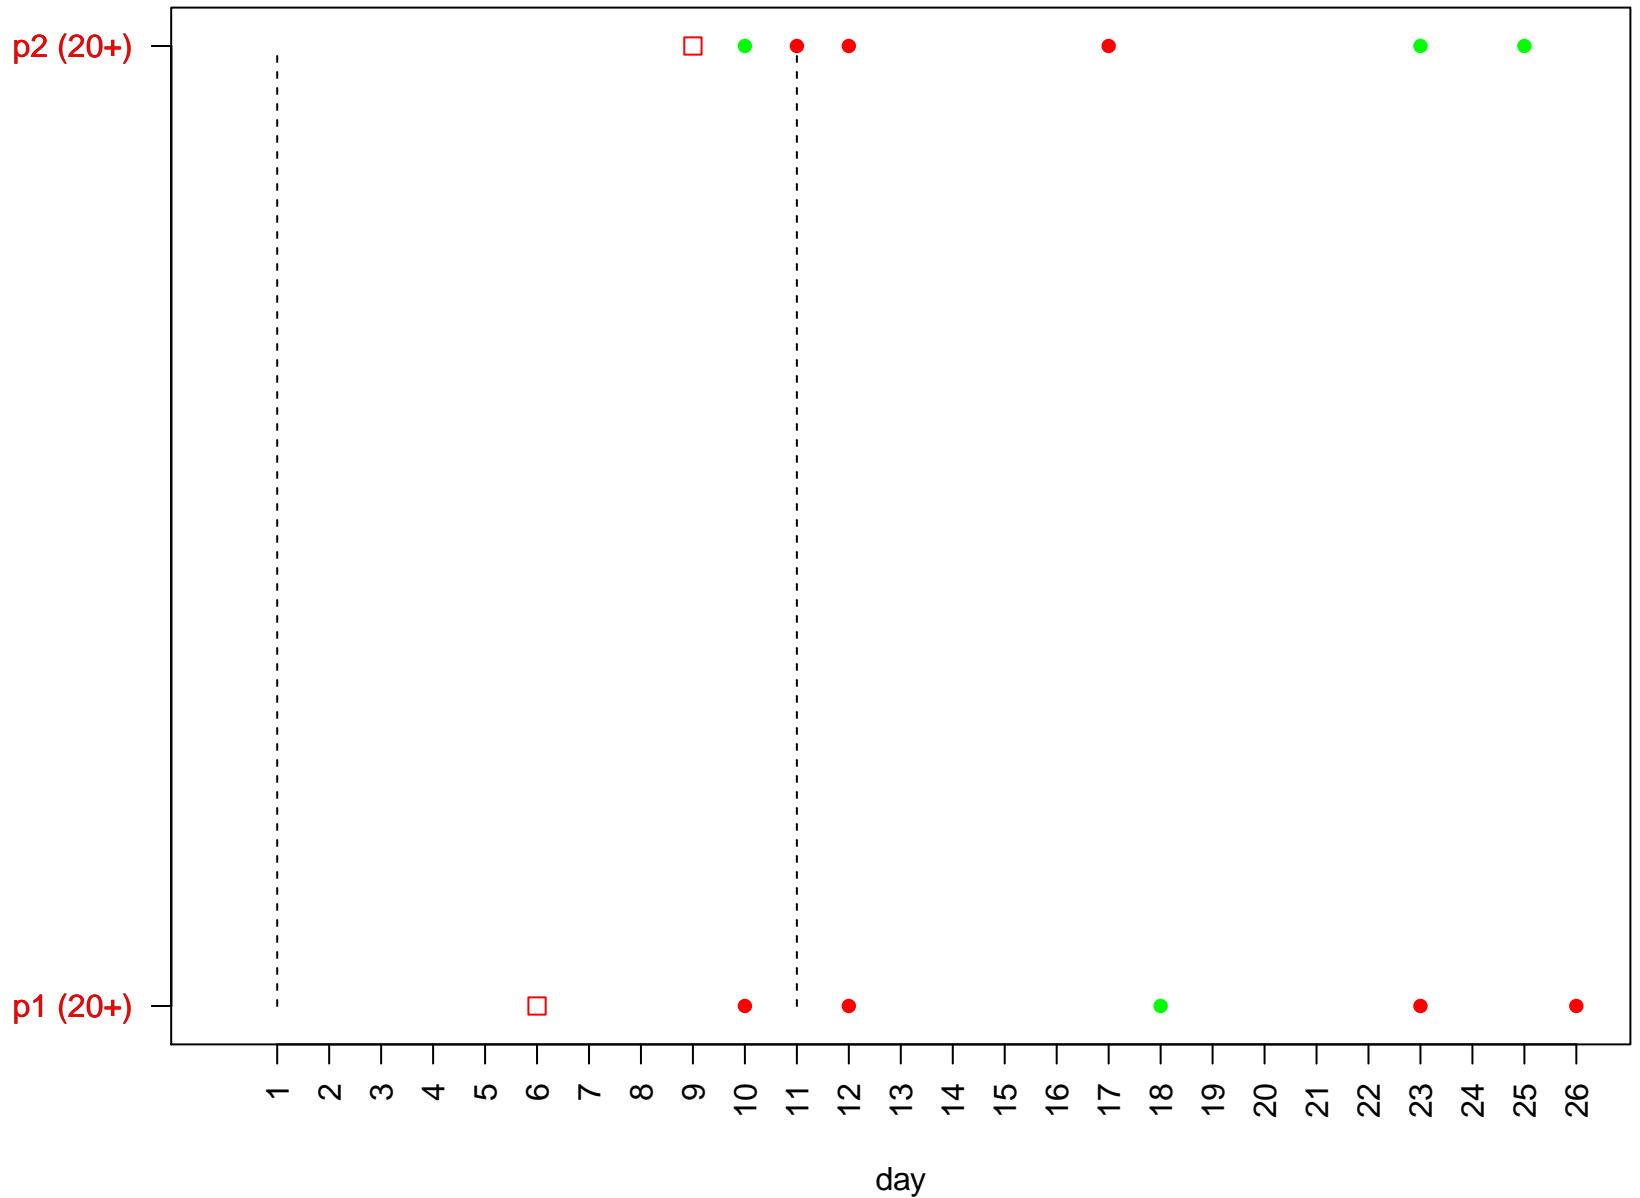

# Household 154

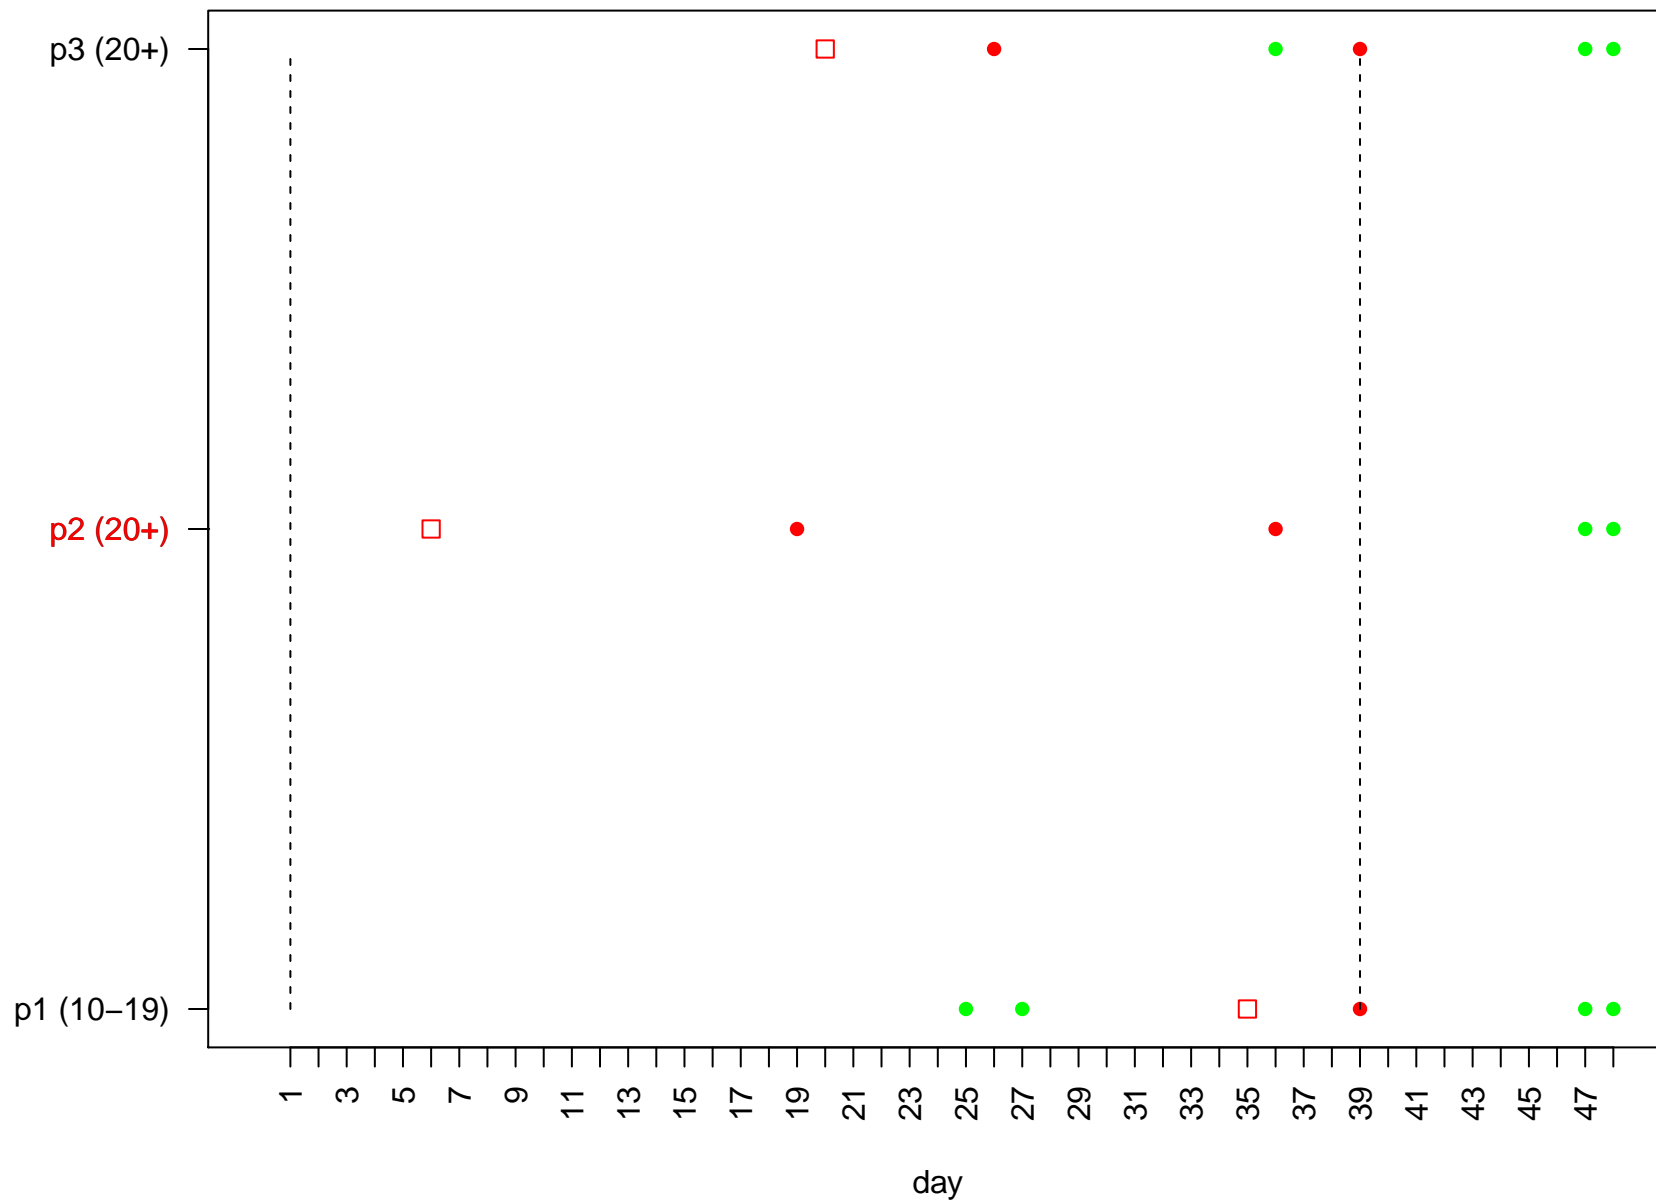

# Household 156

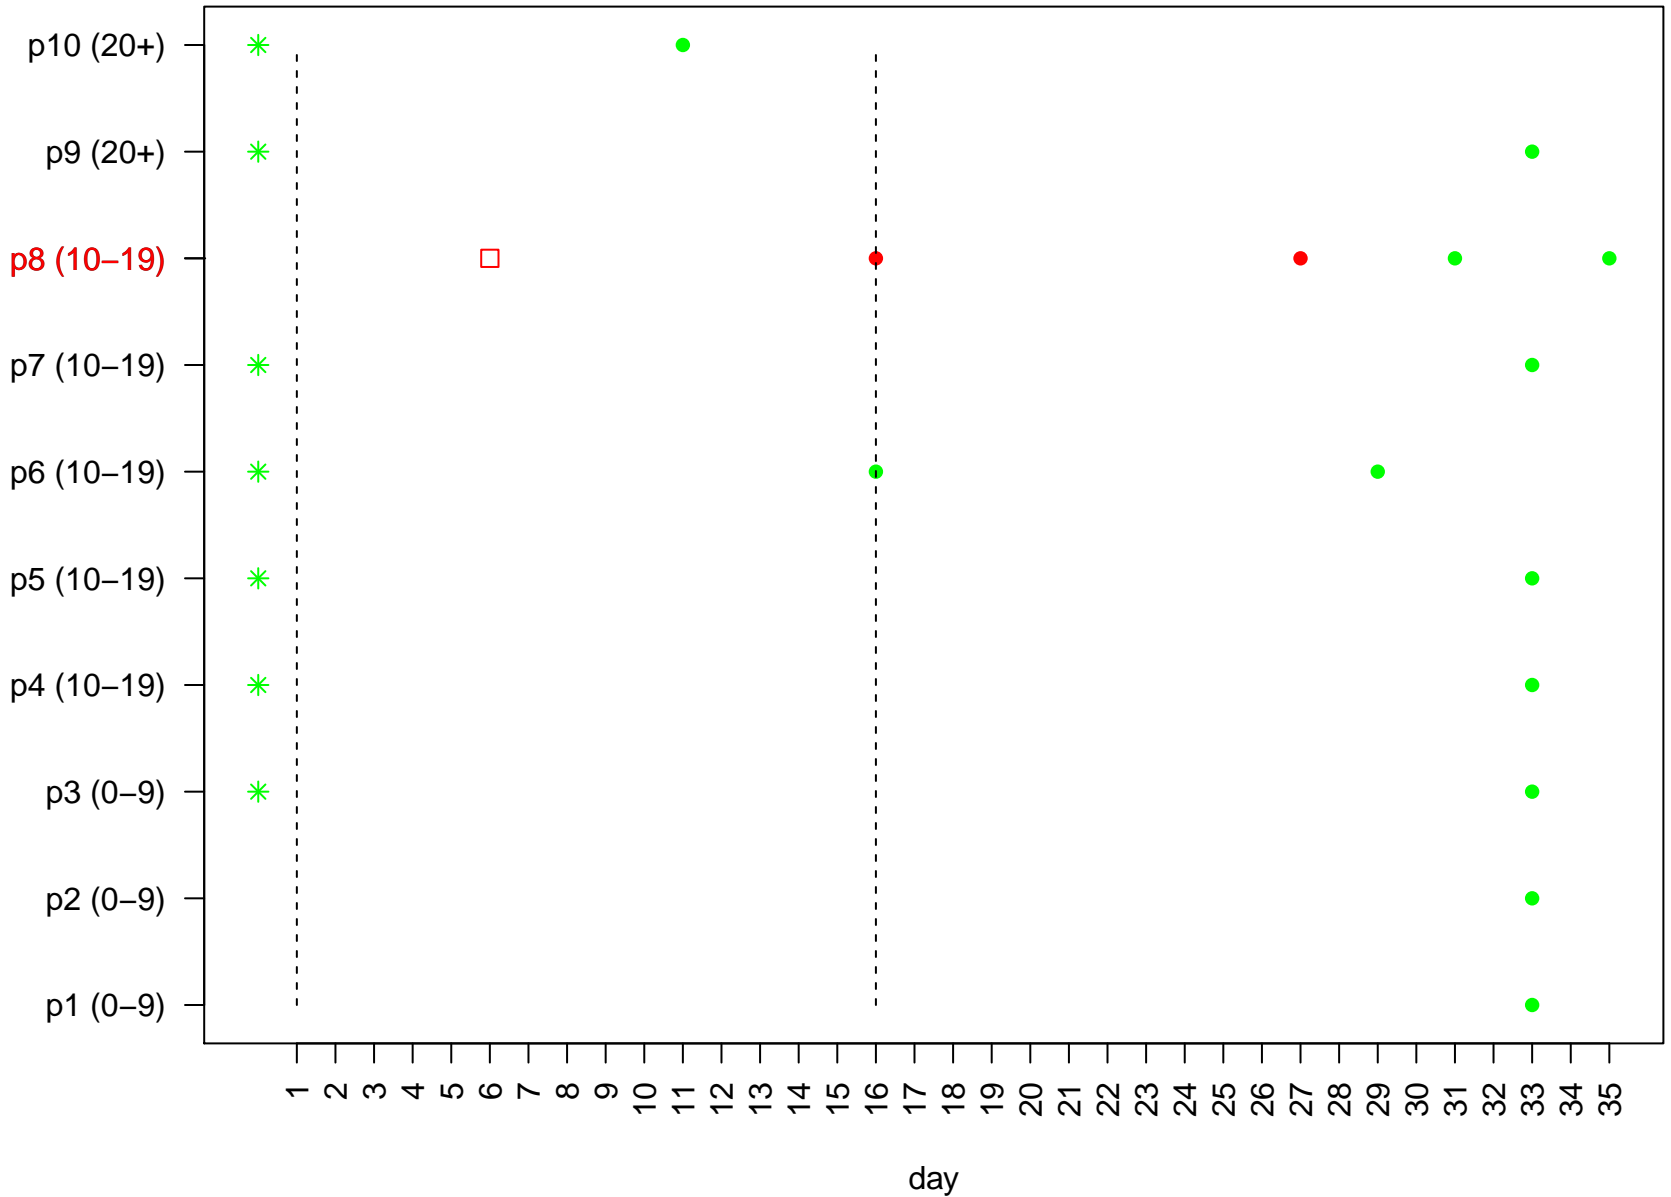

# Household 157

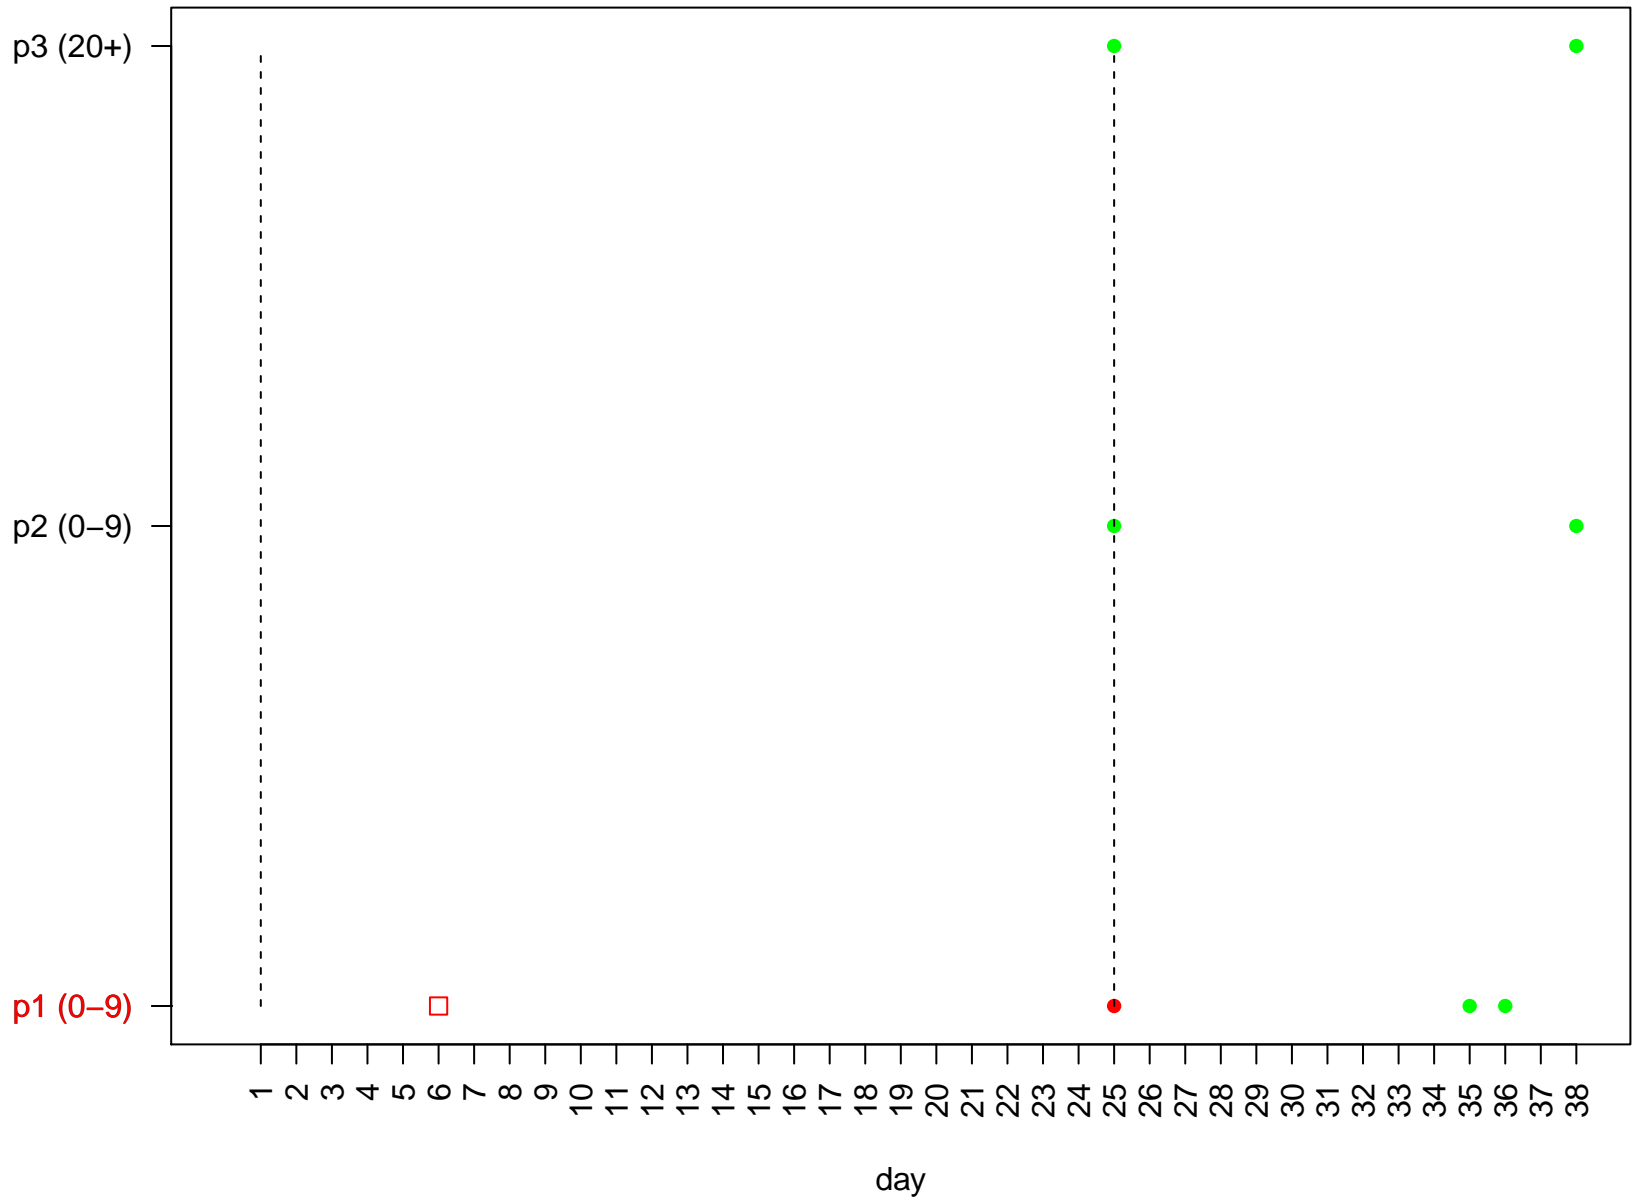

# Household 158

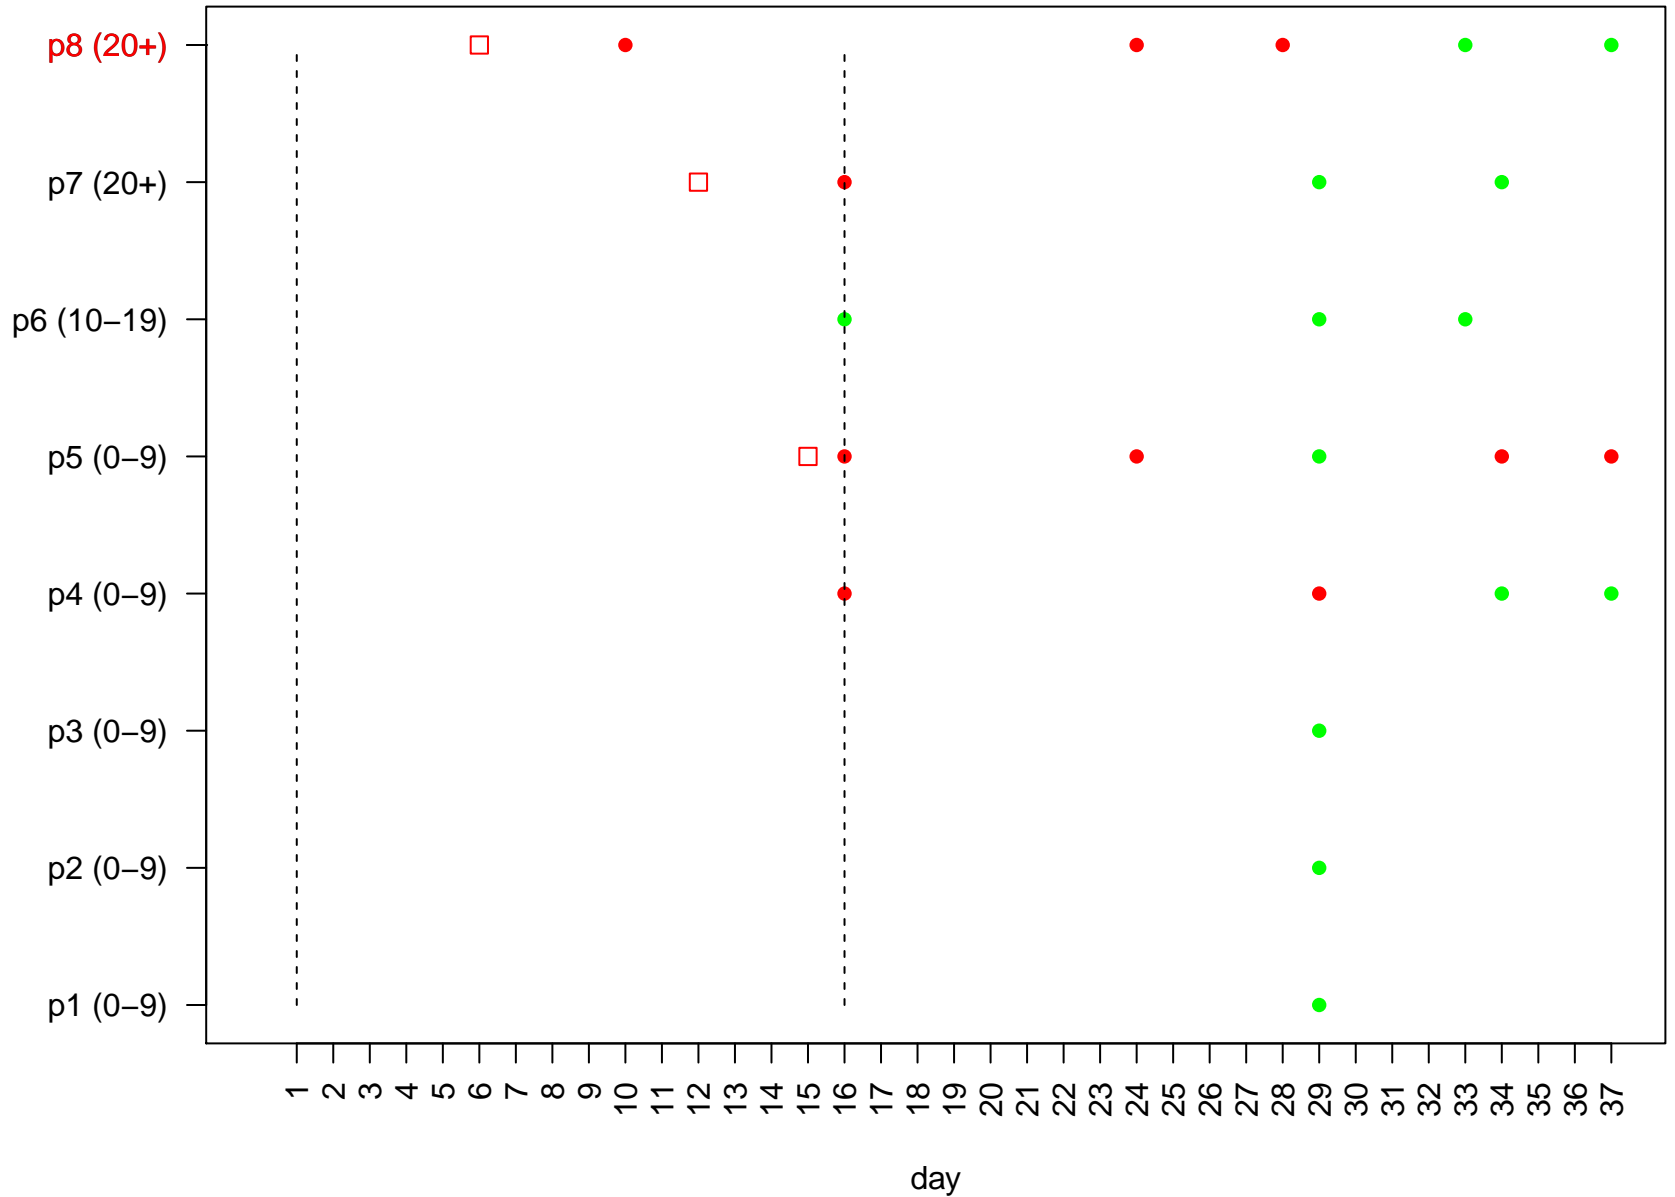

# Household 159

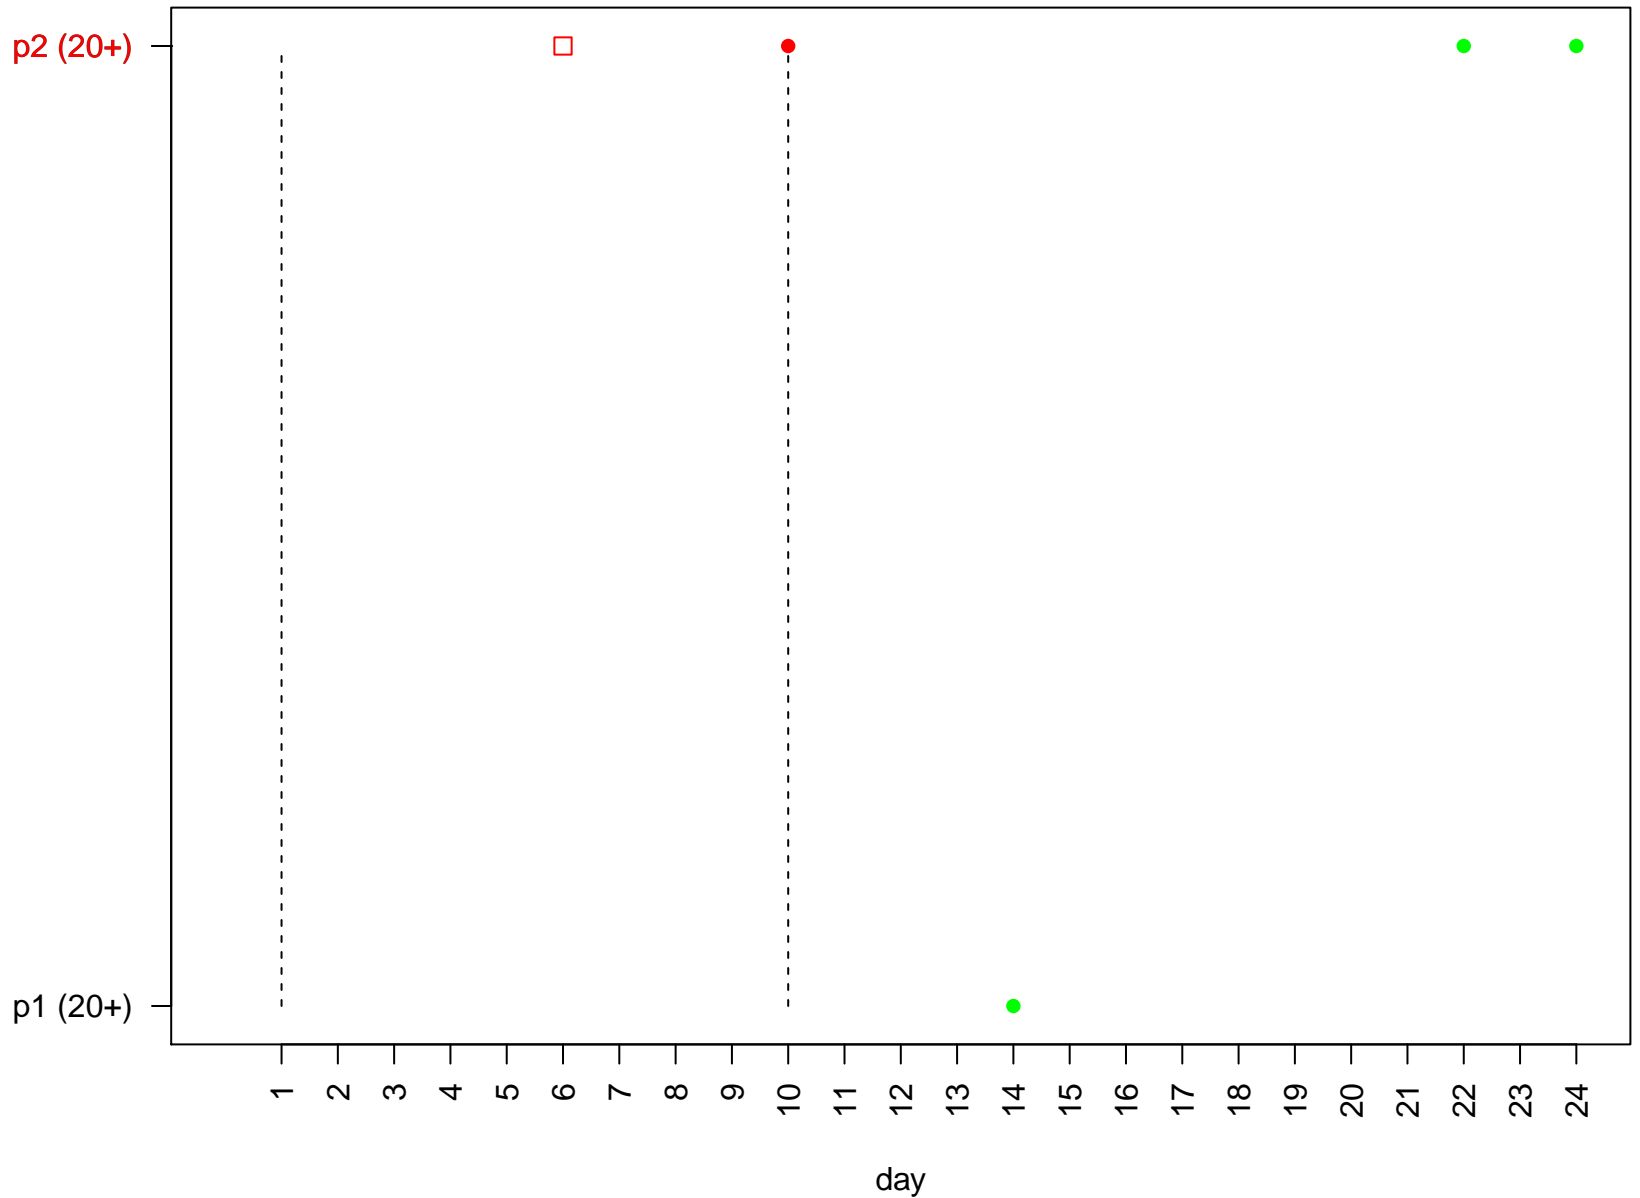

# Household 160

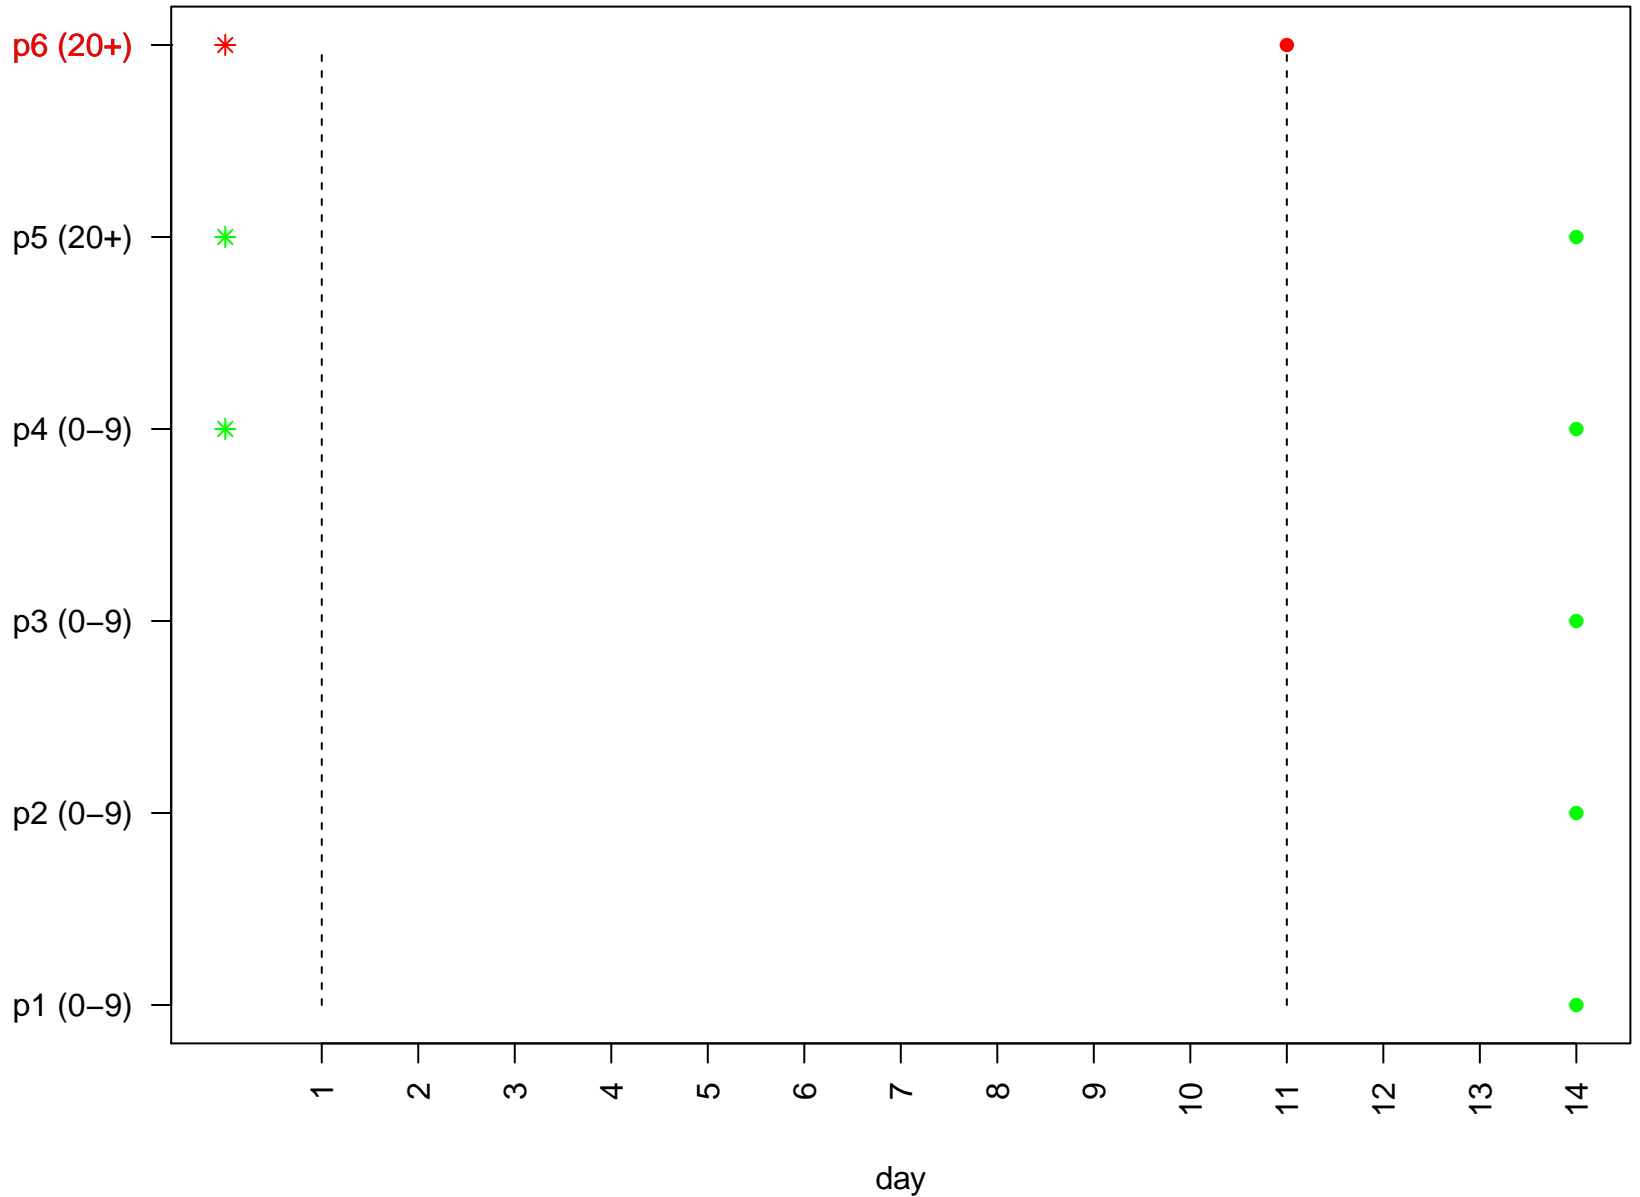



# Household 161

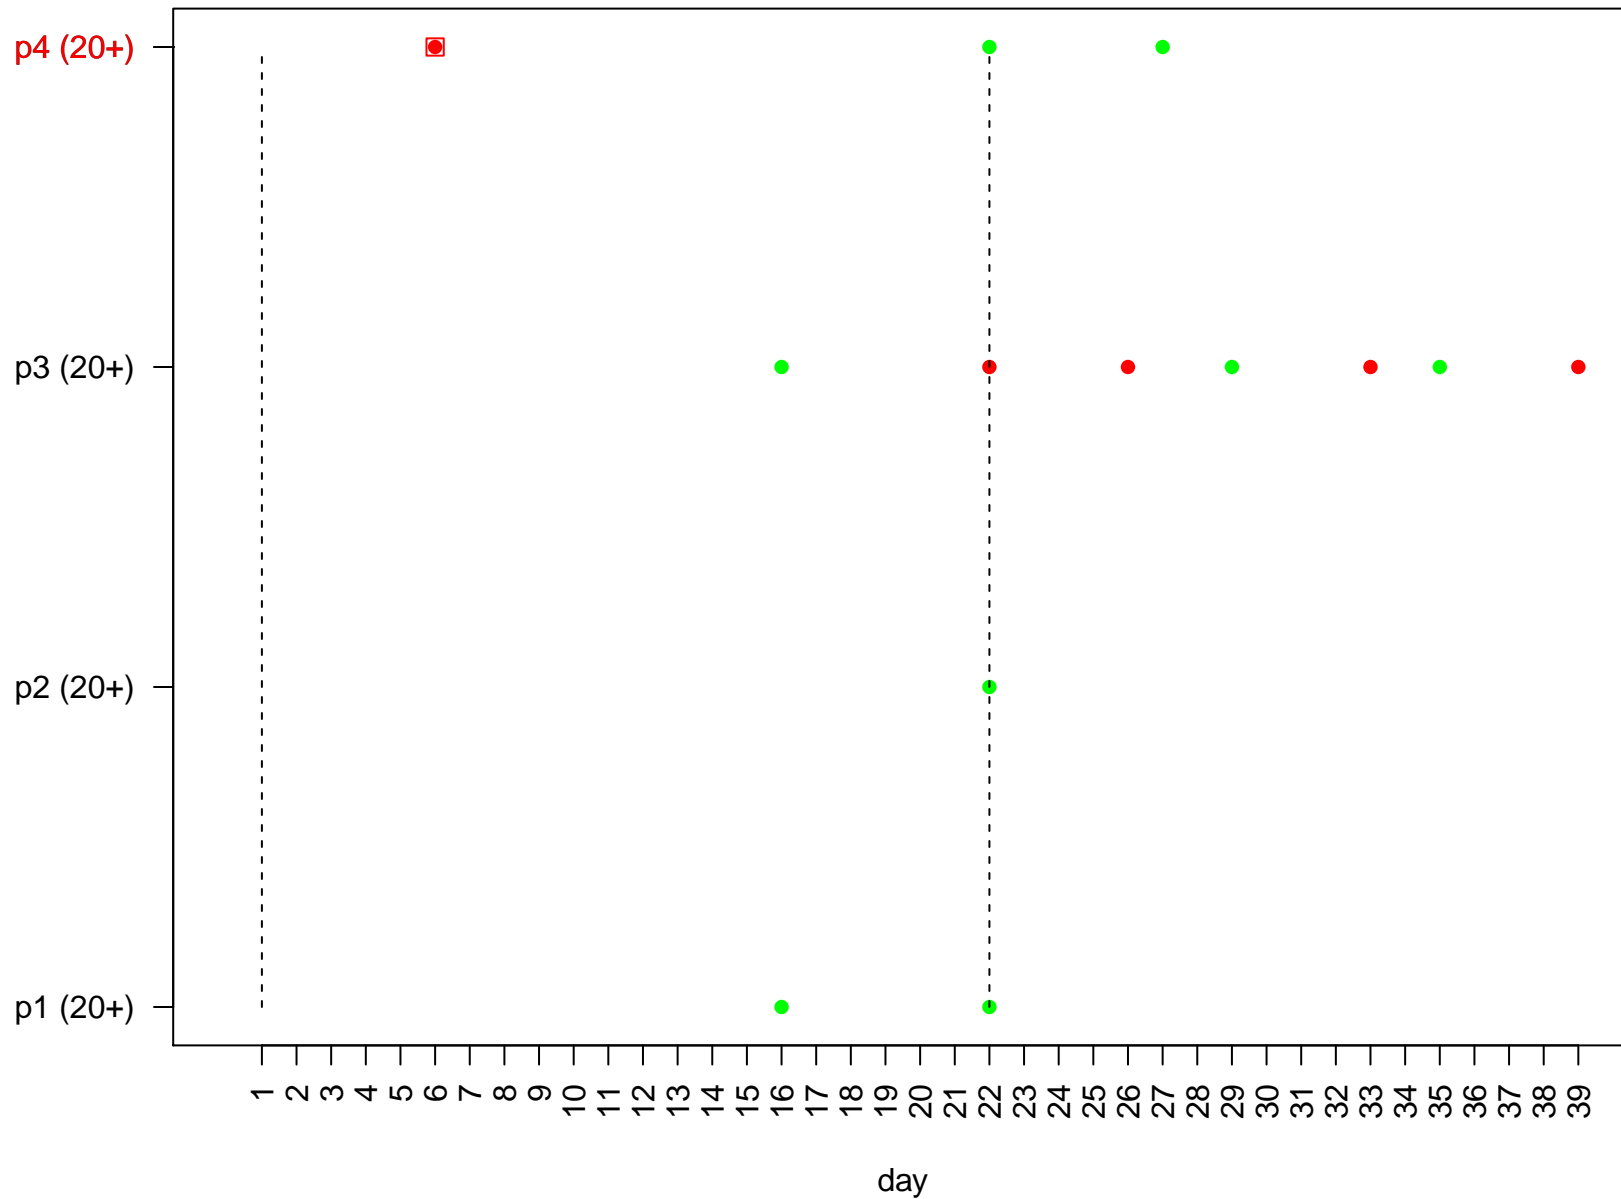

# Household 162

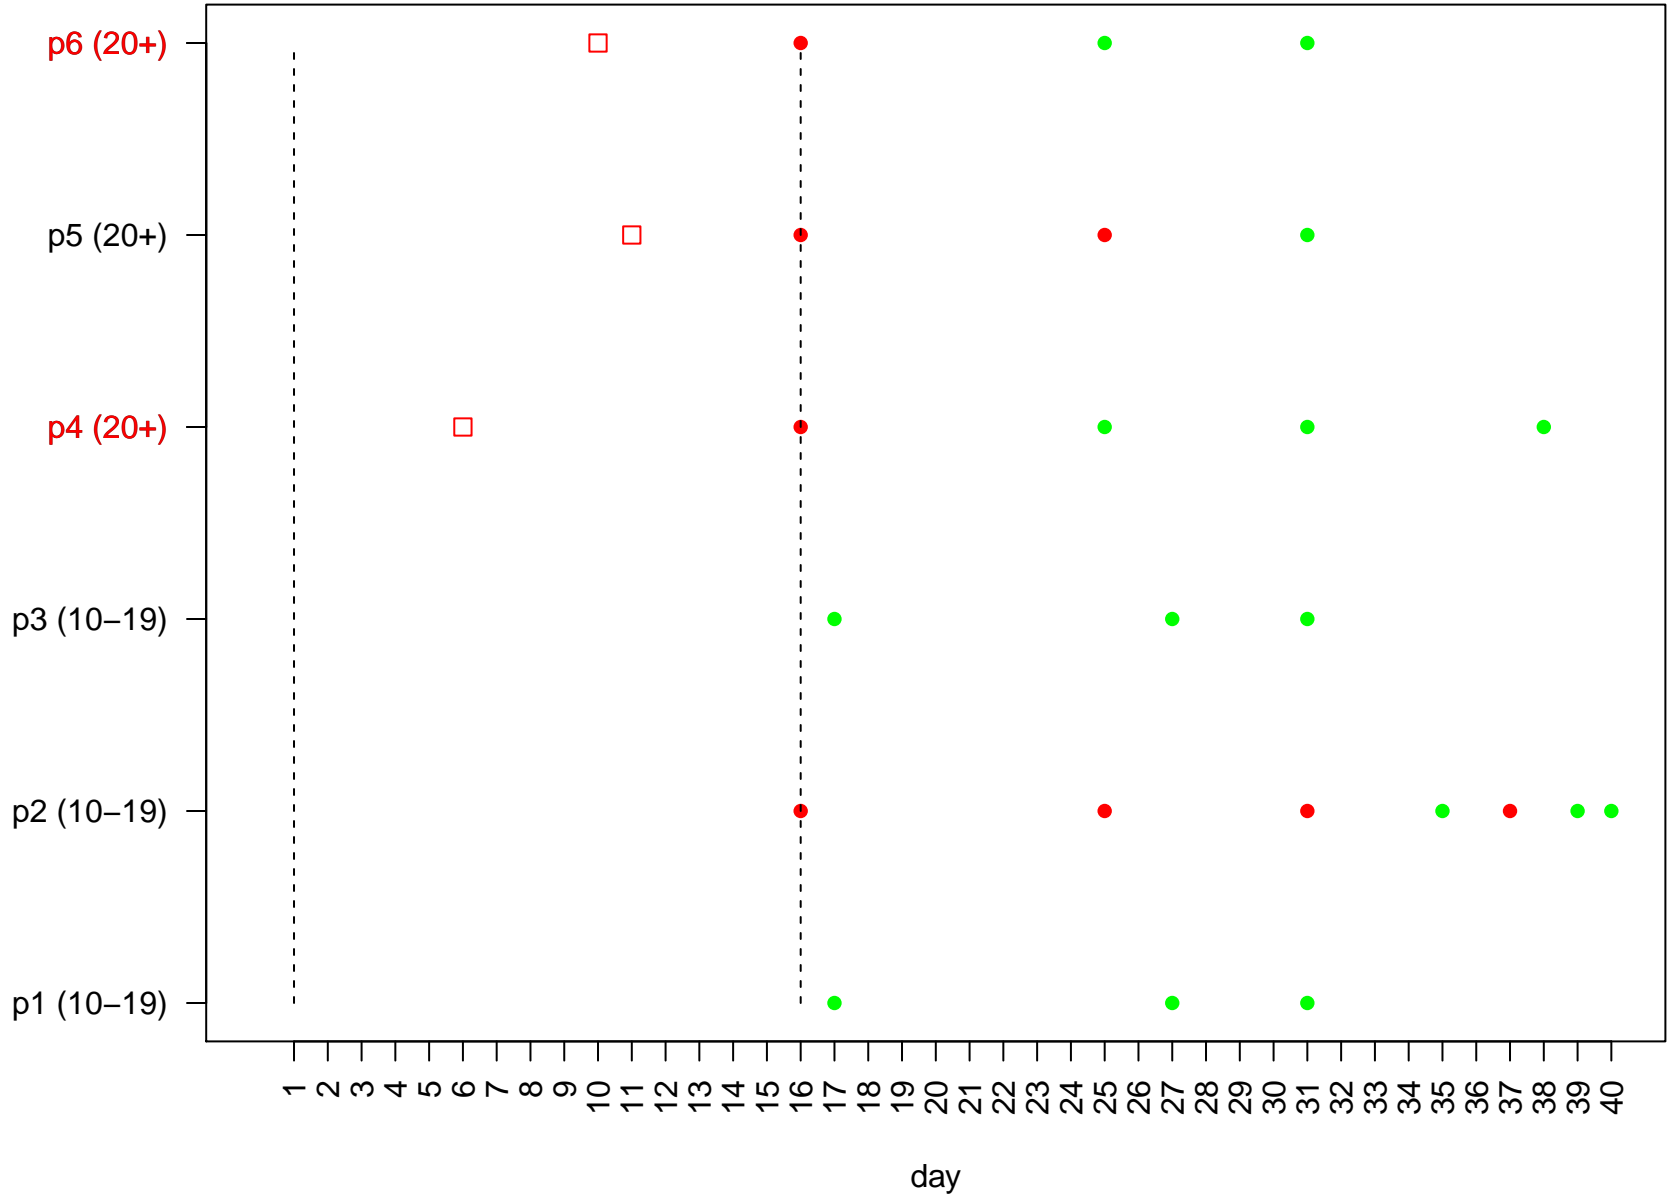

# Household 163

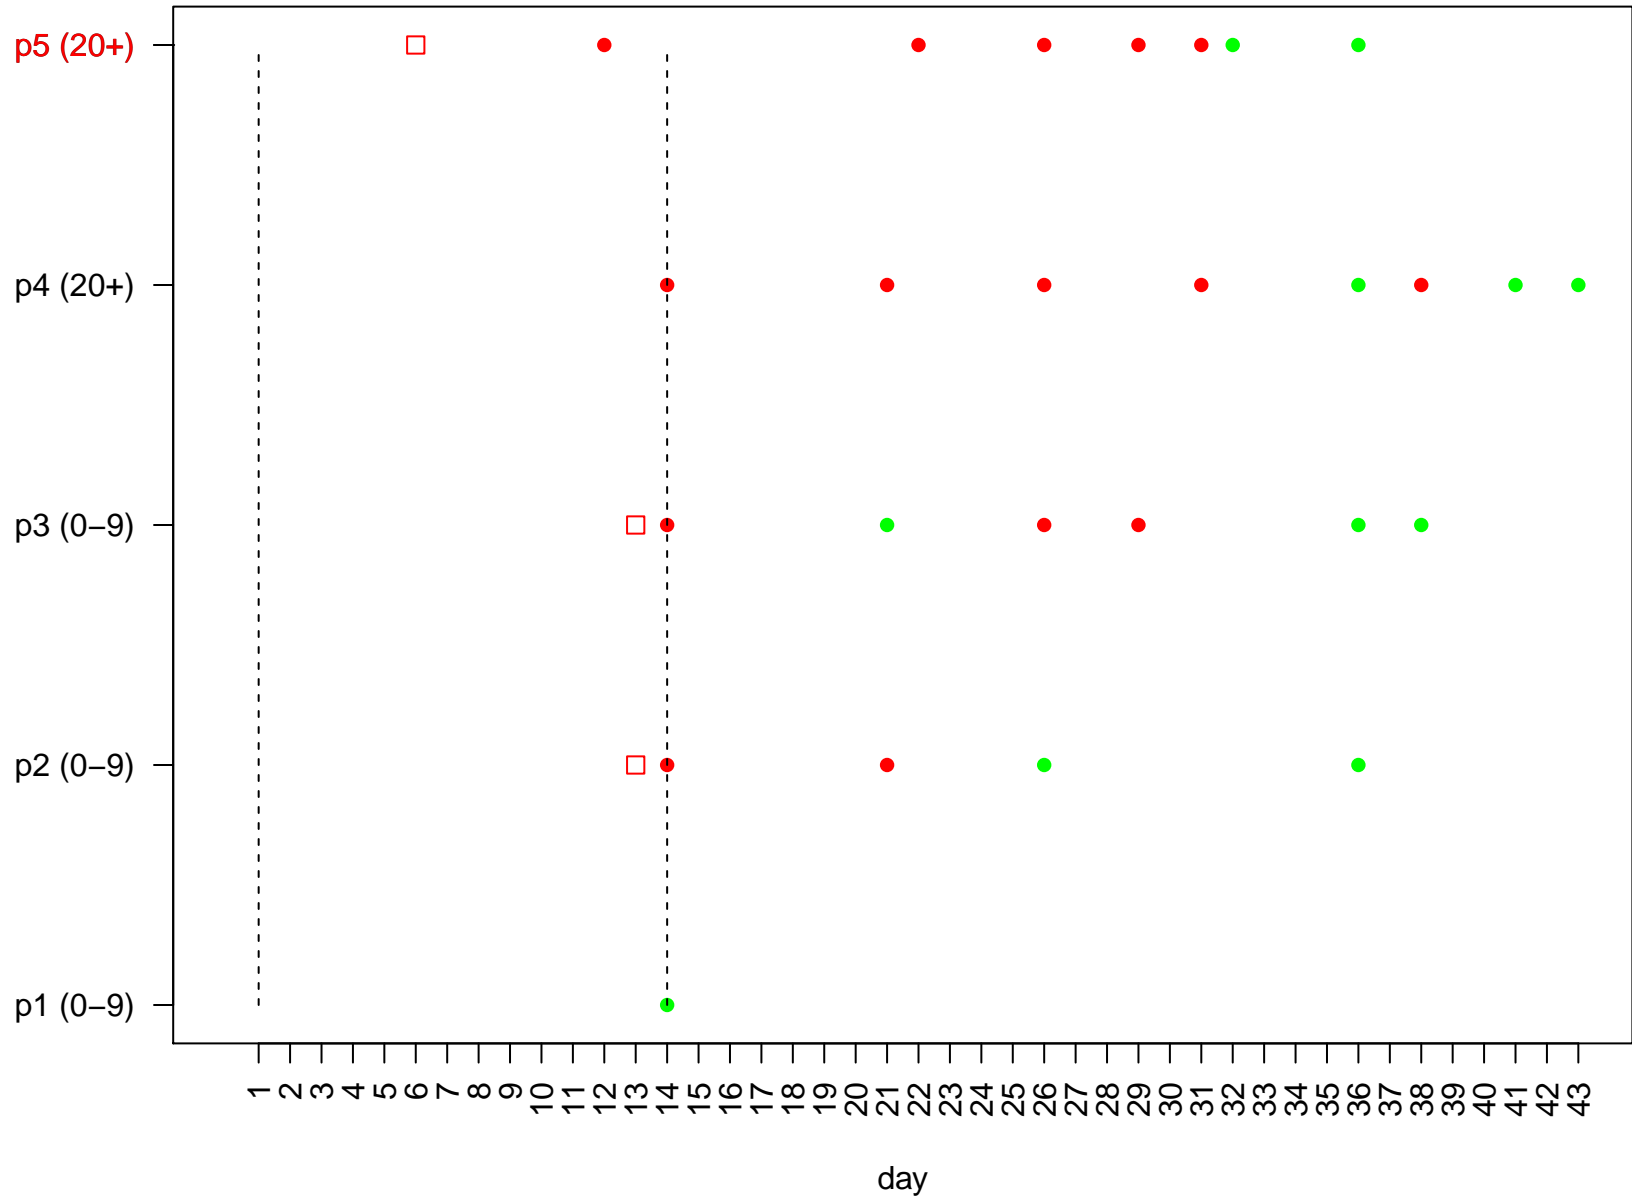

# Household 164

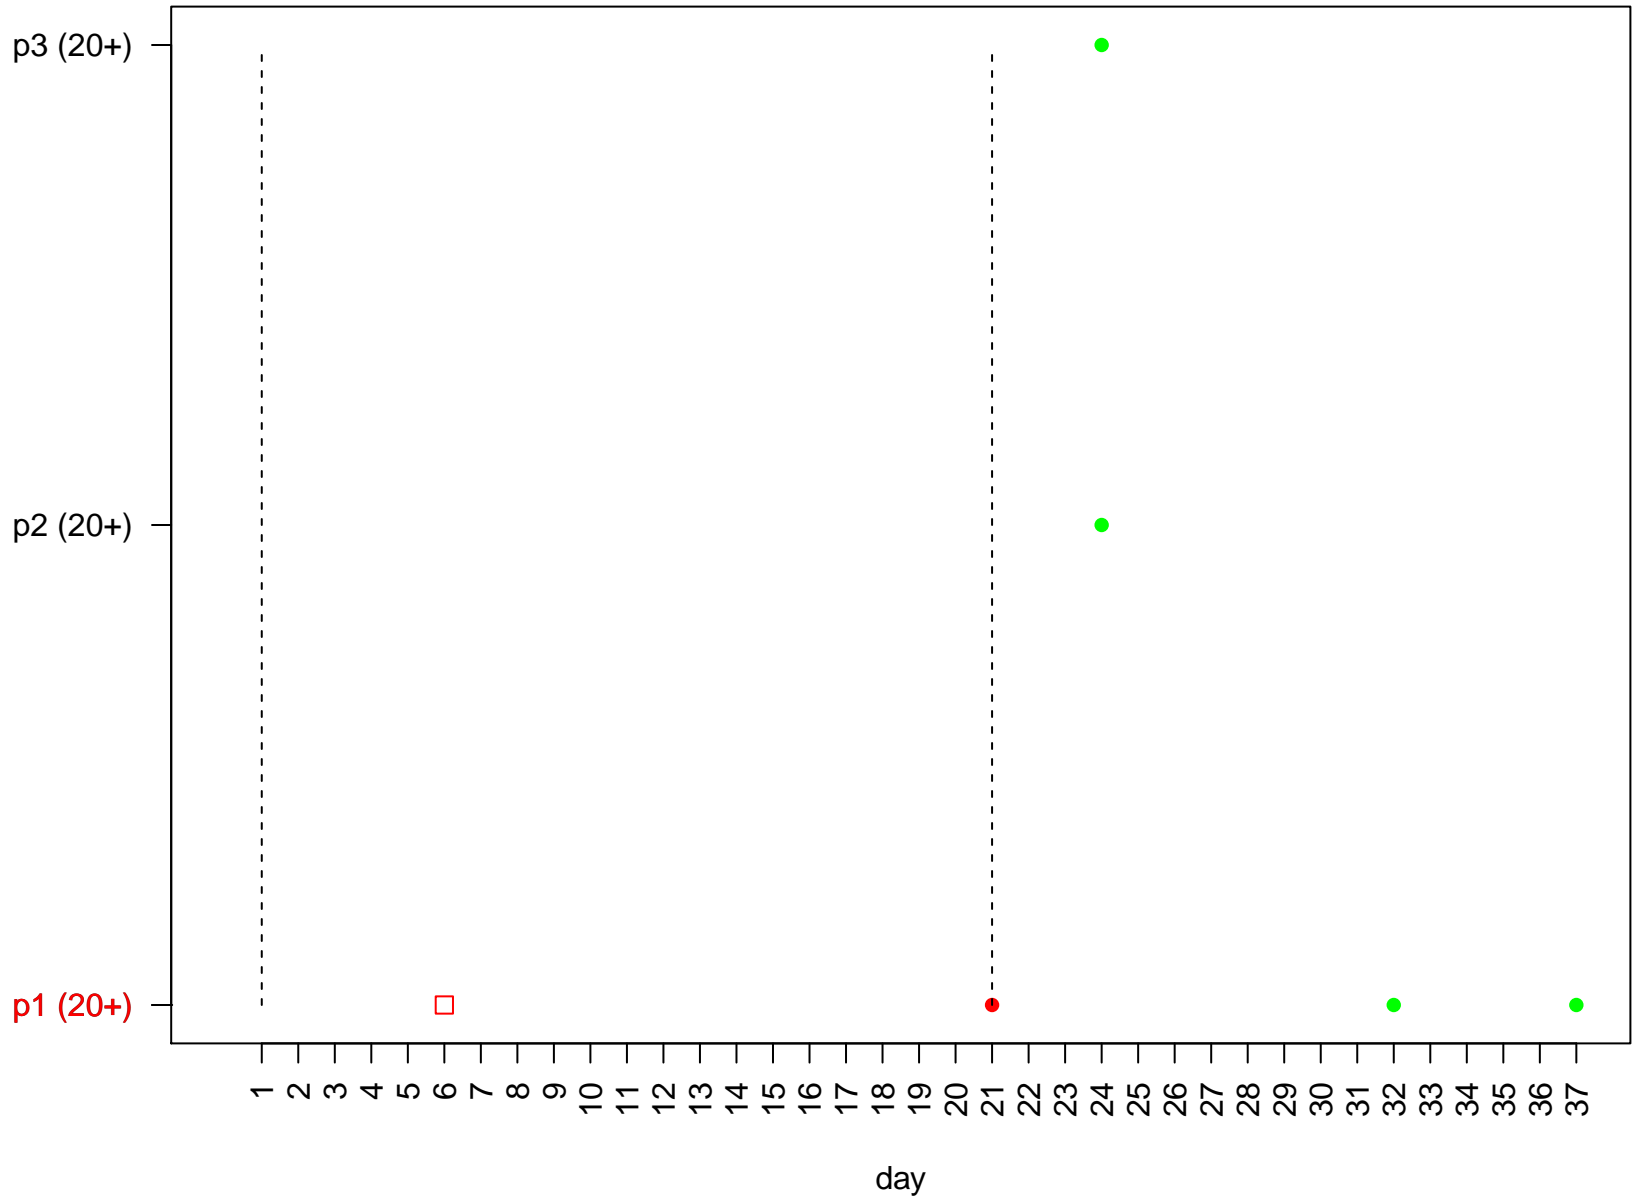

# Household 165

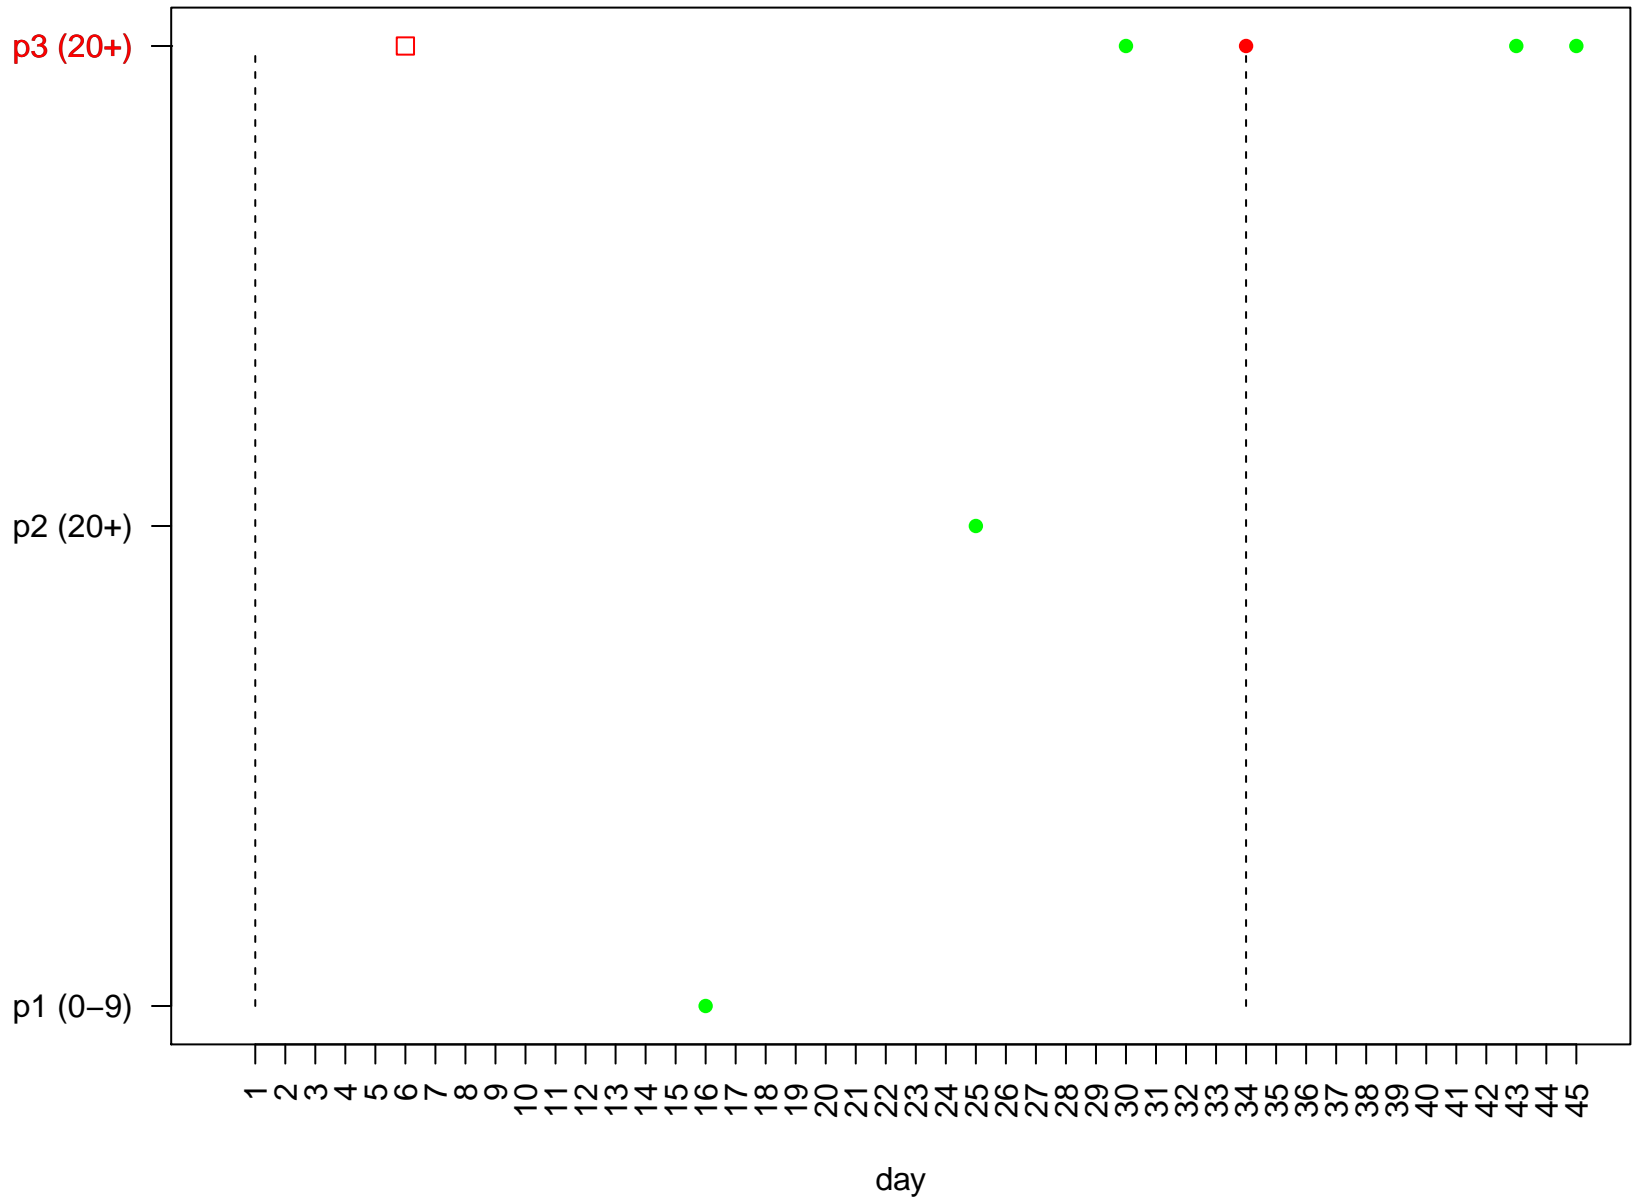

# Household 166

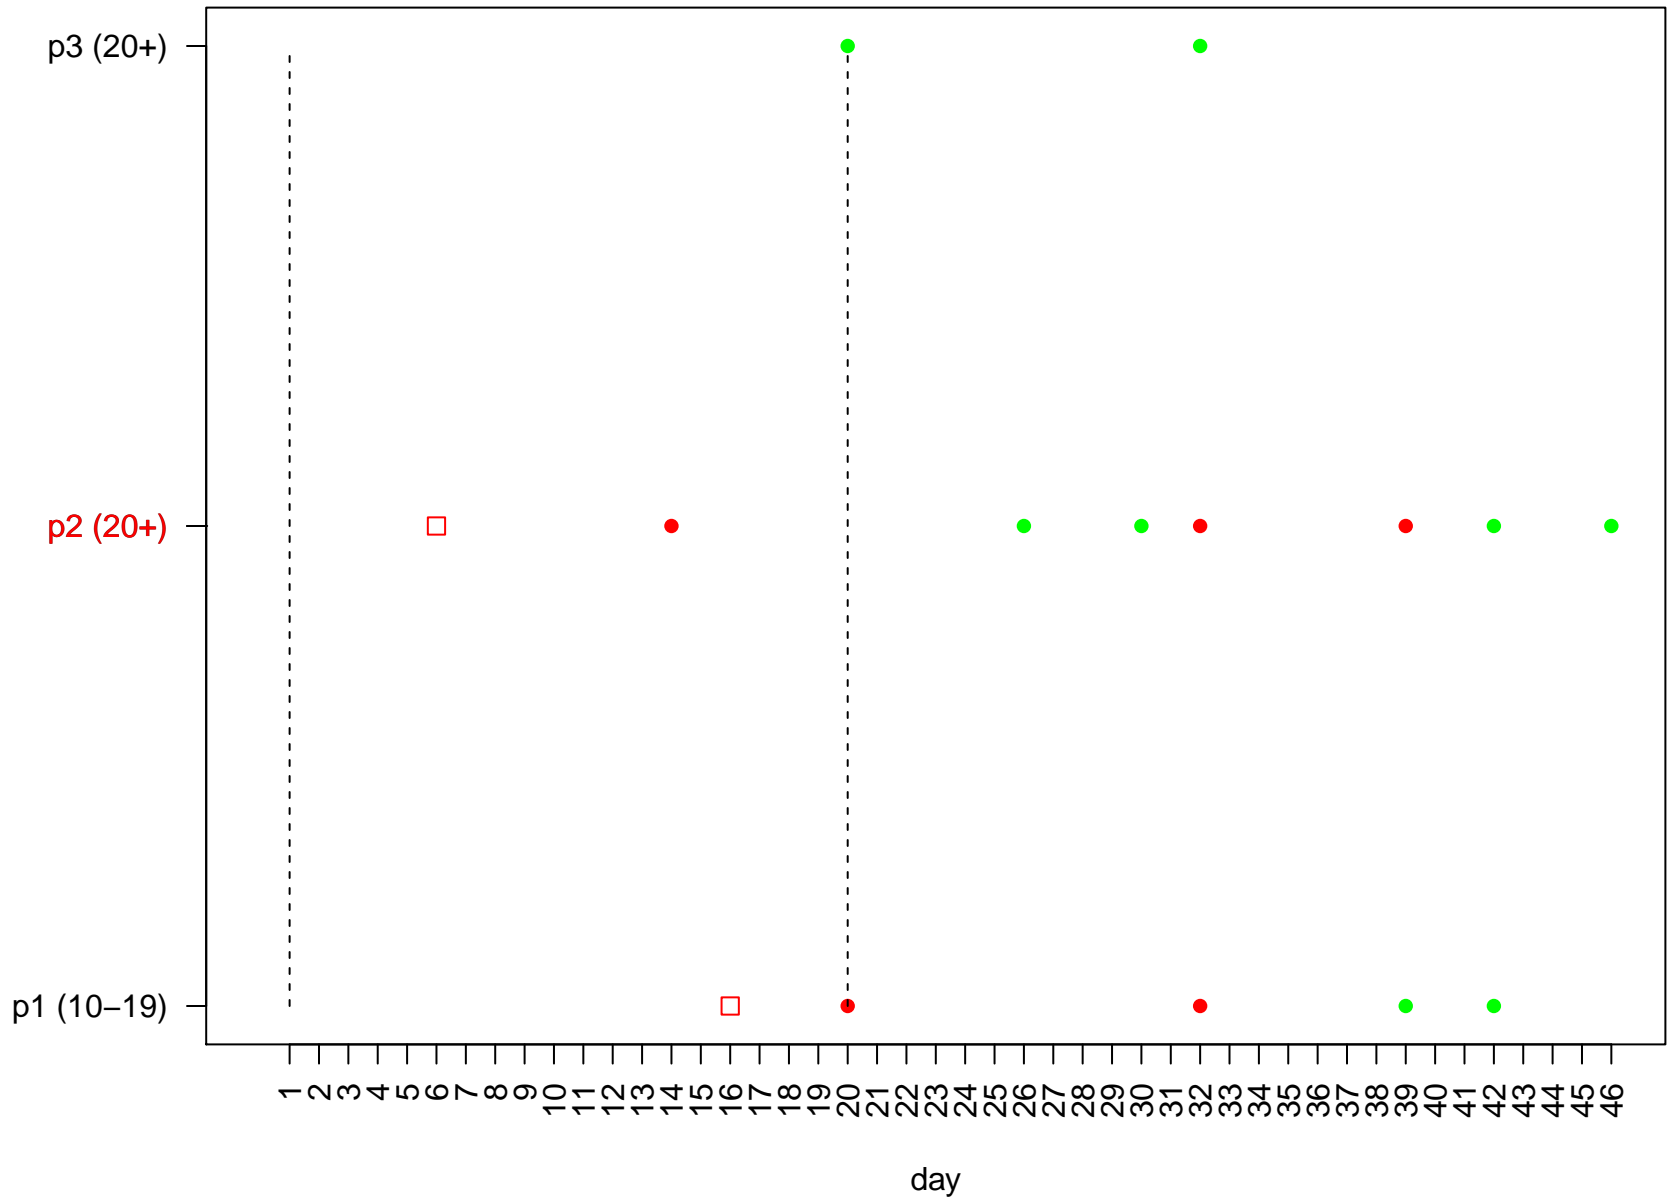

# Household 167

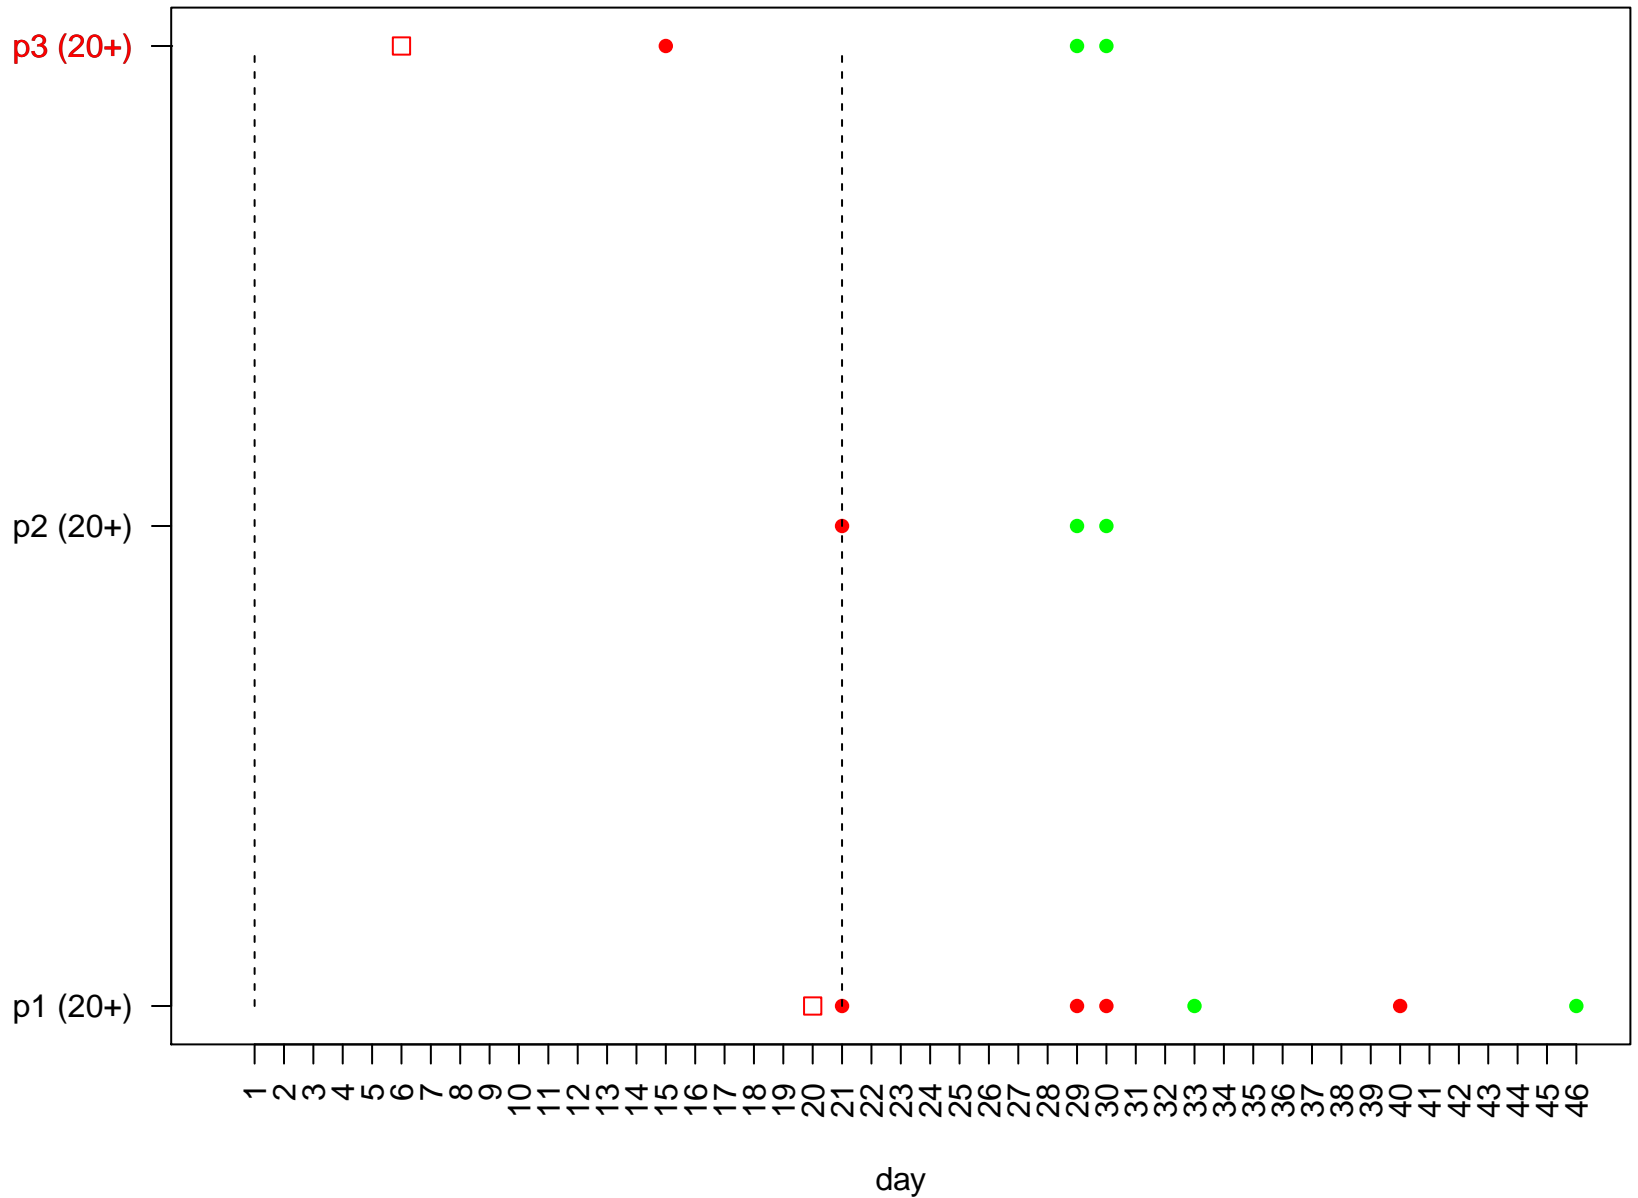

# Household 168

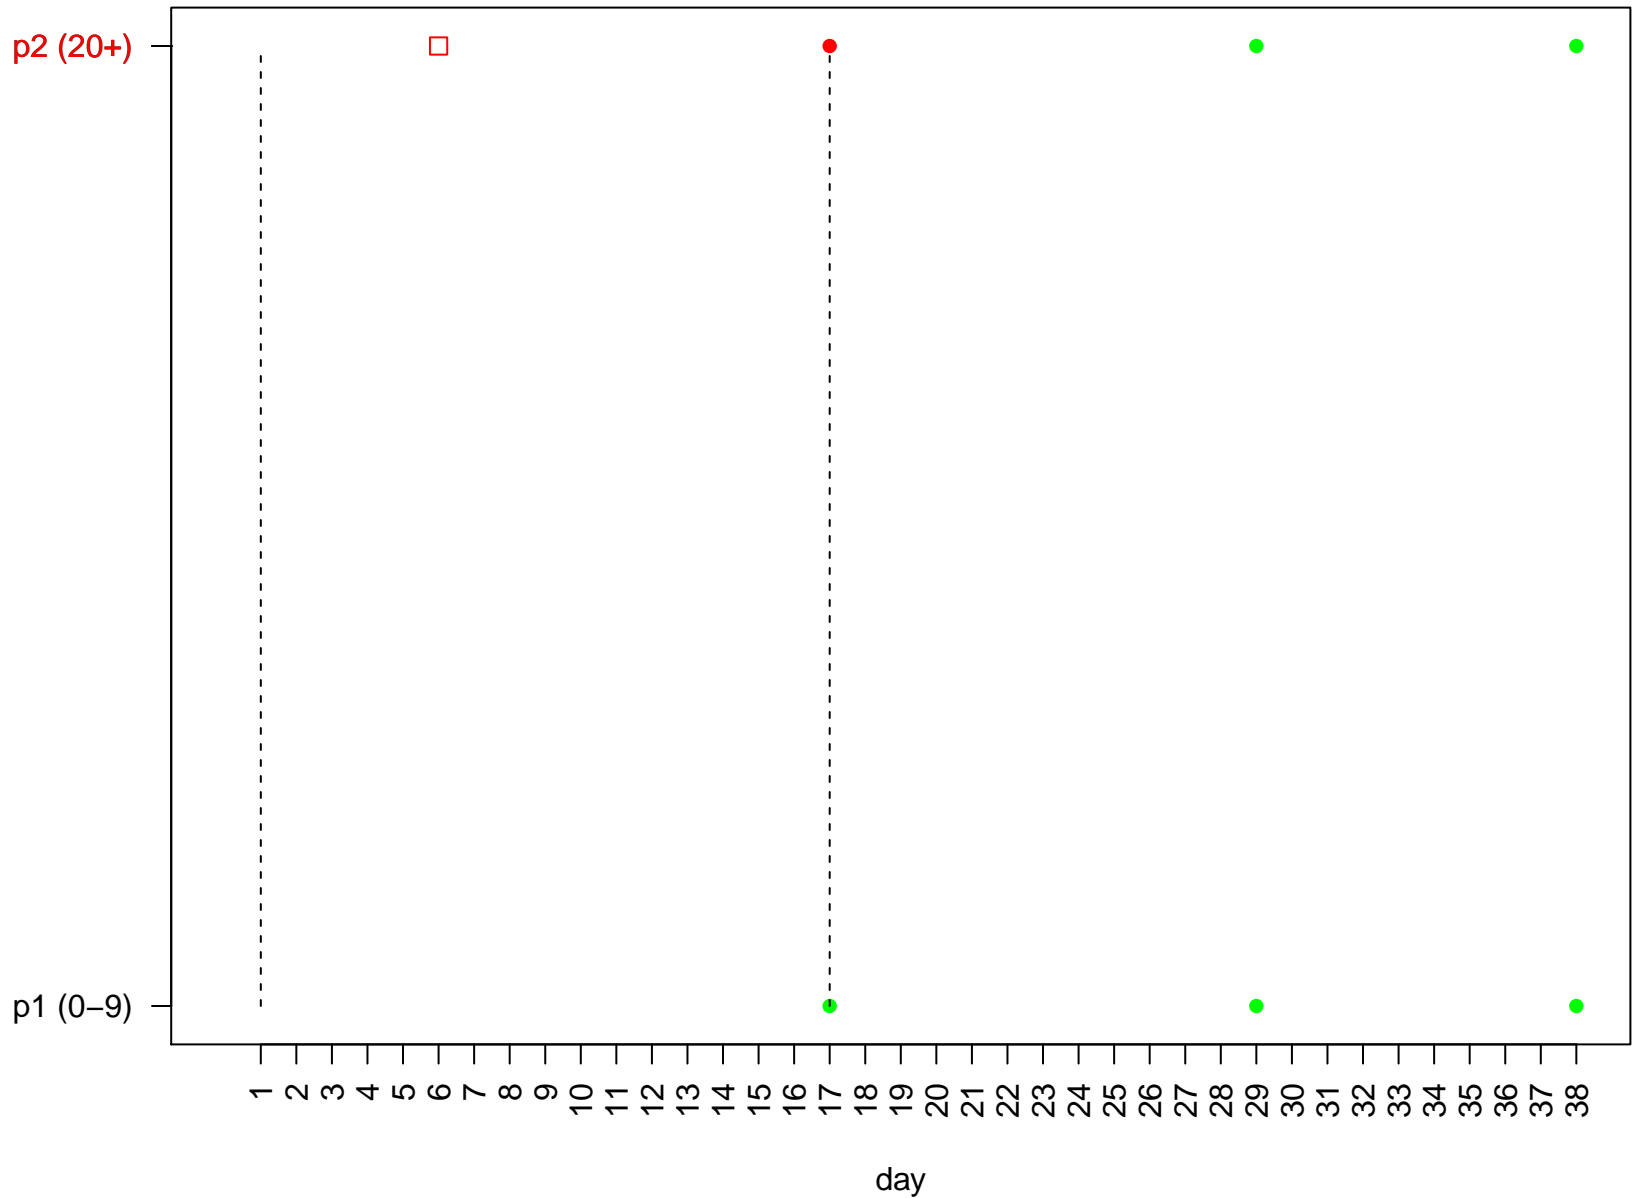



# Household 169

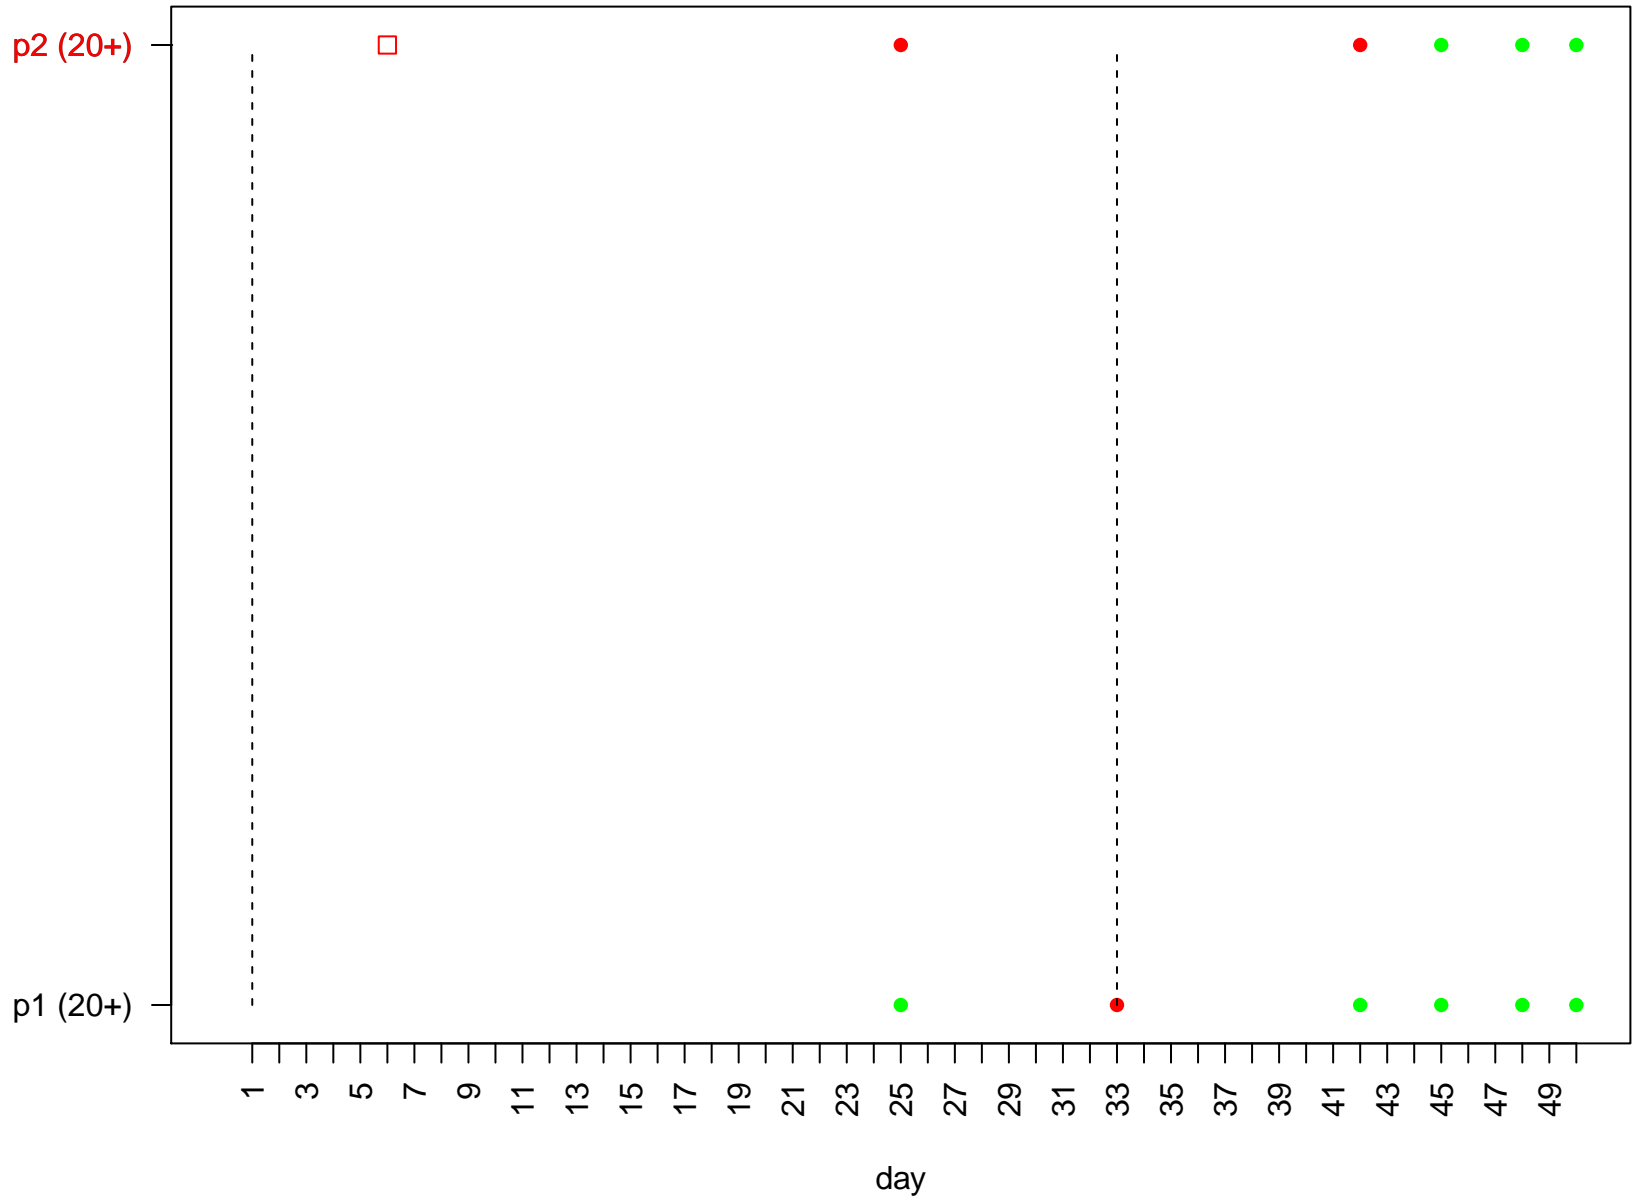

# Household 170

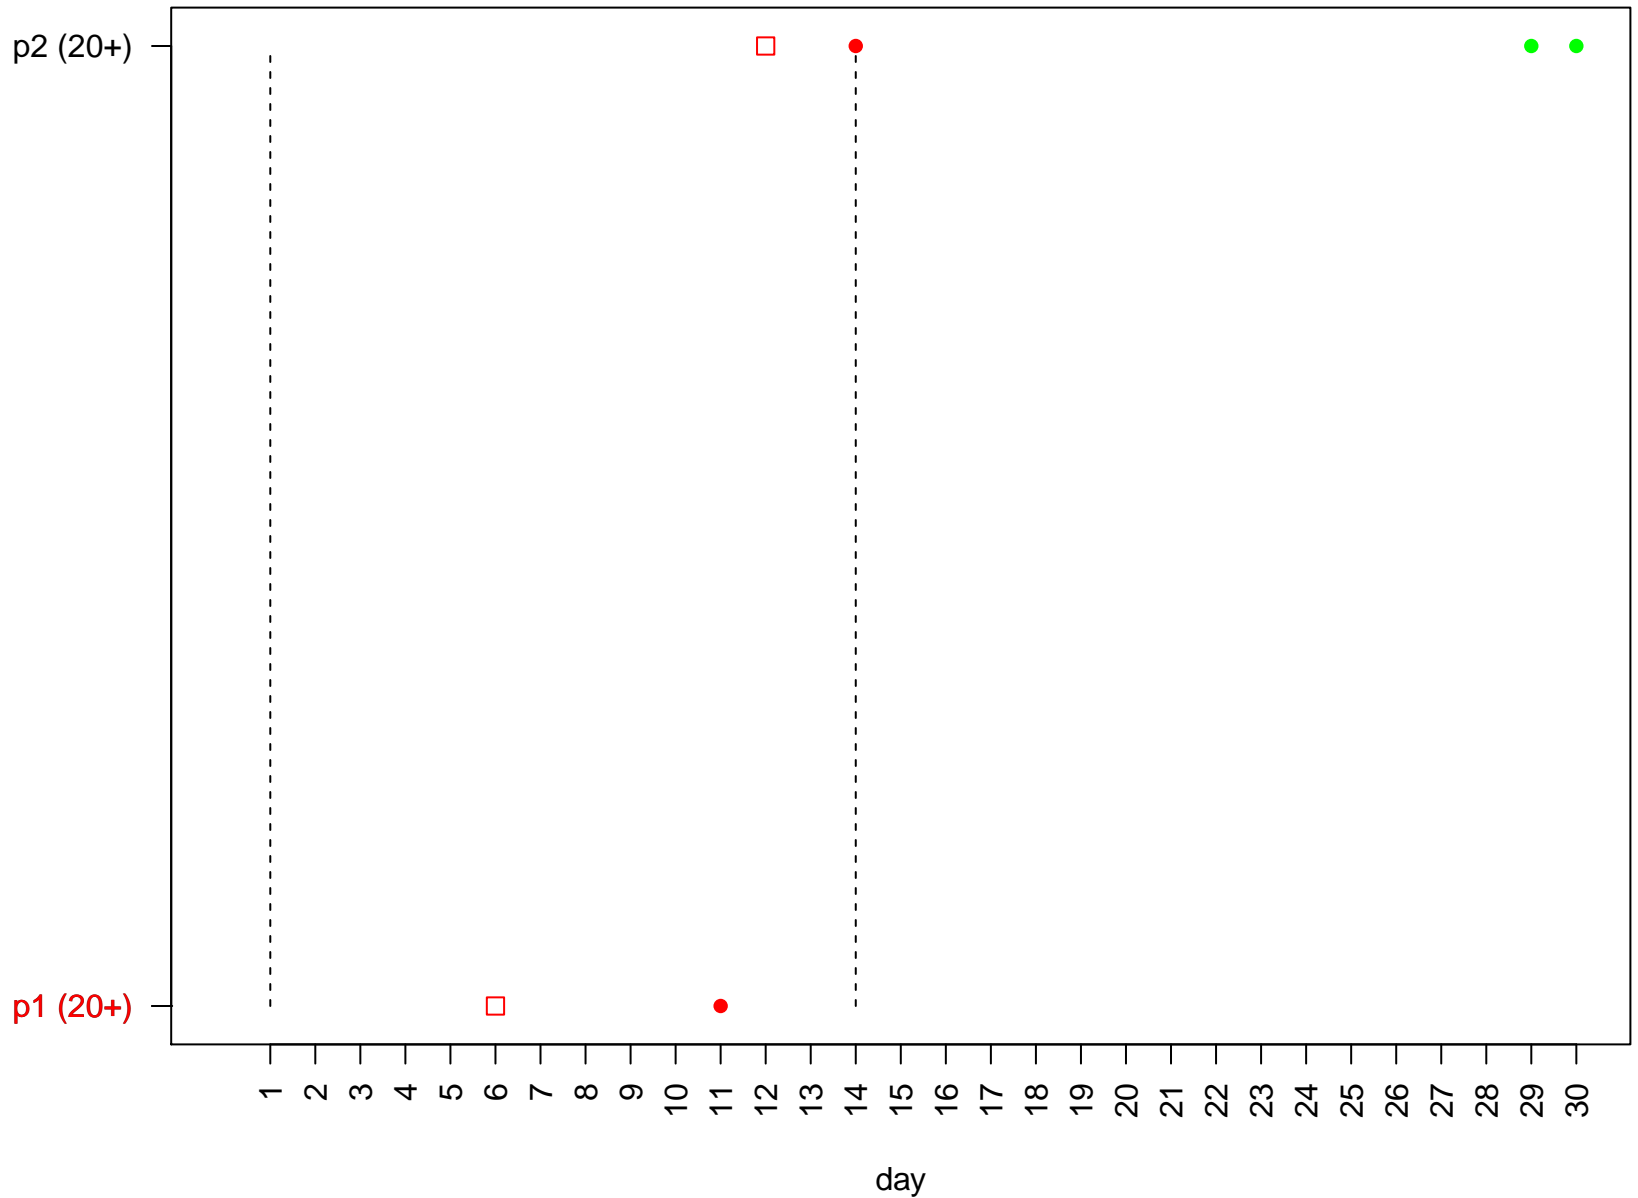

# Household 171

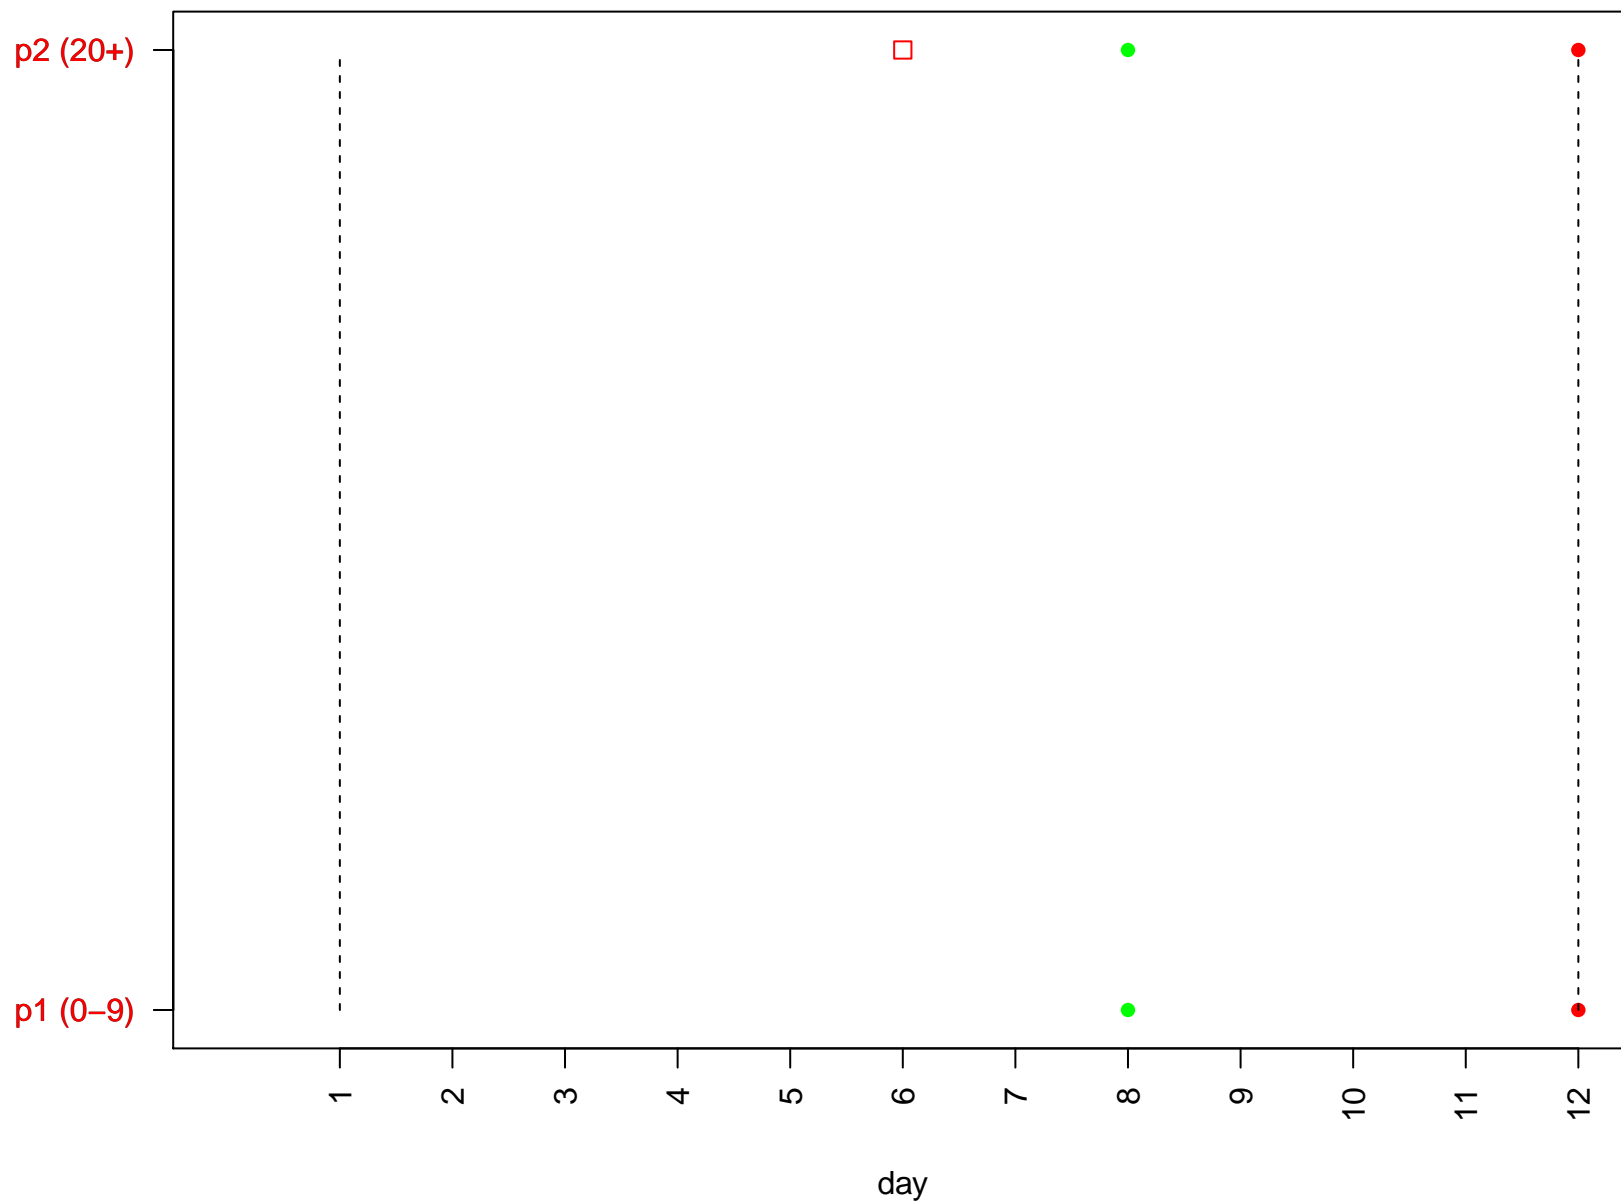

# Household 172

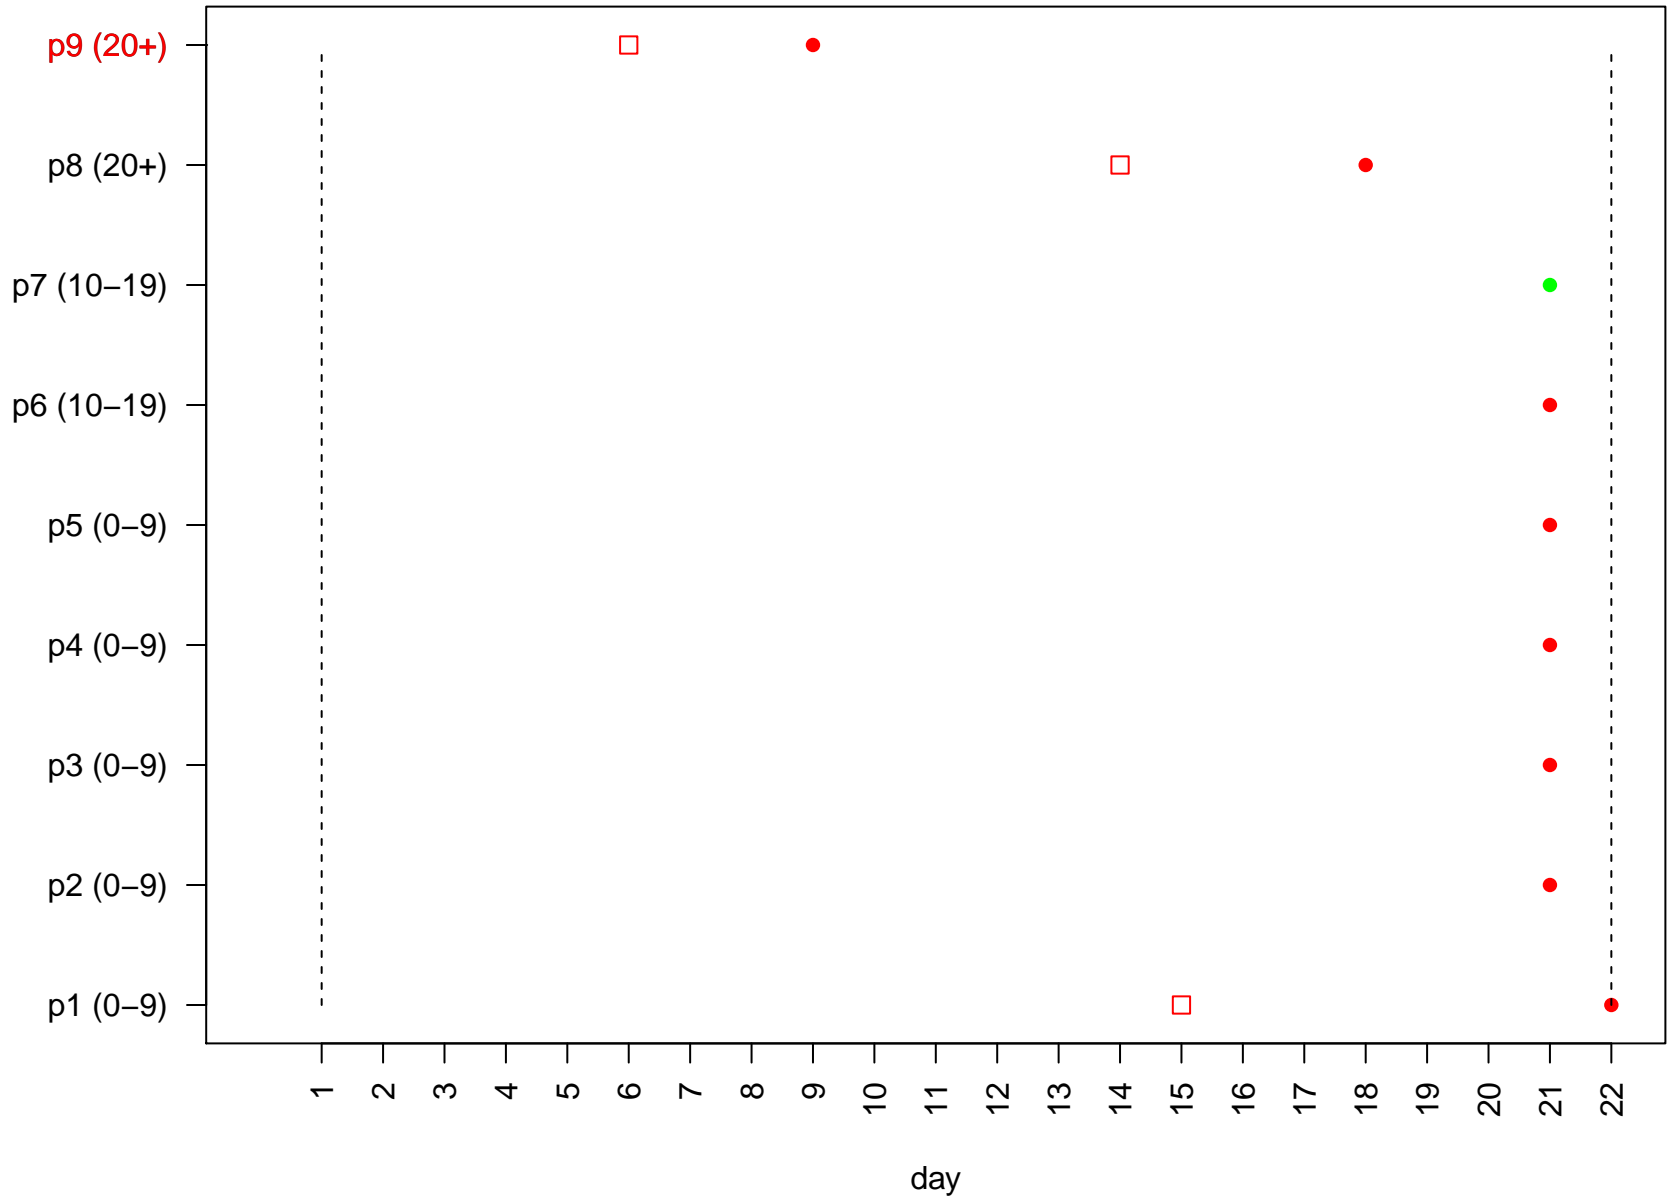

# Household 173

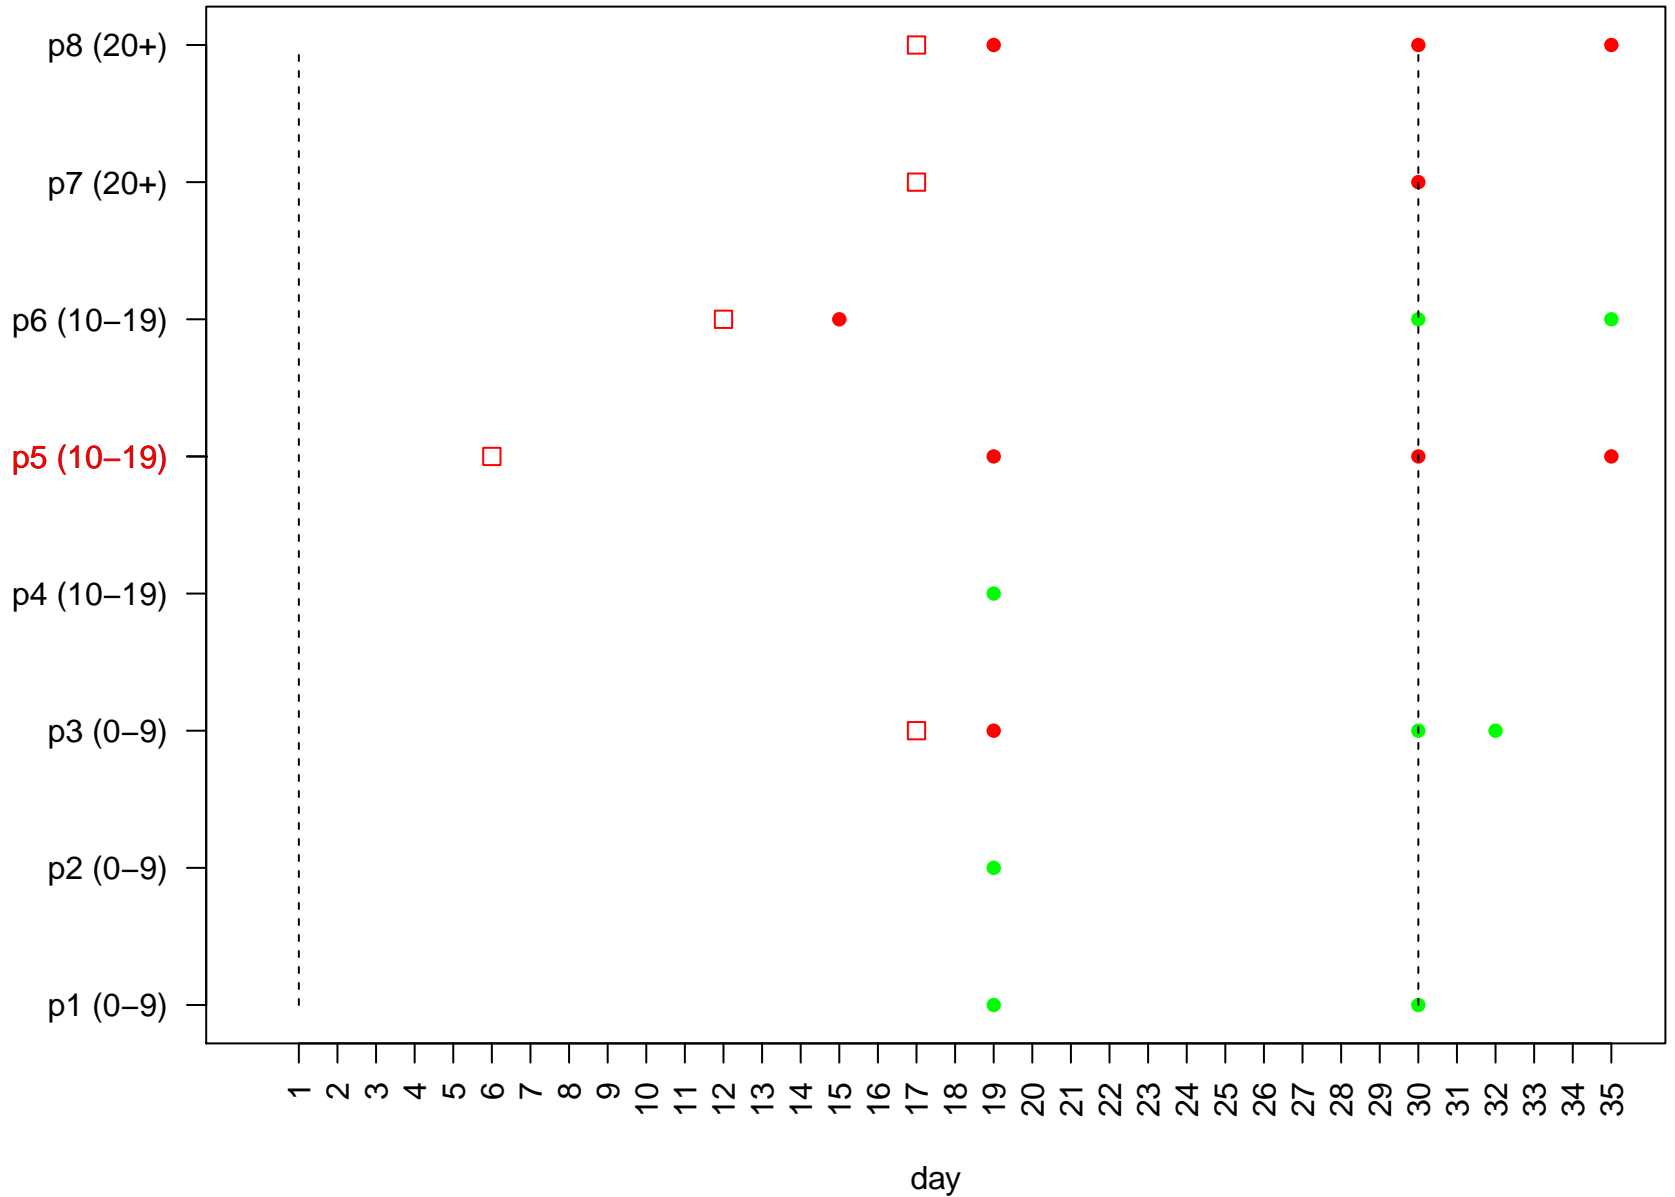

# Household 174

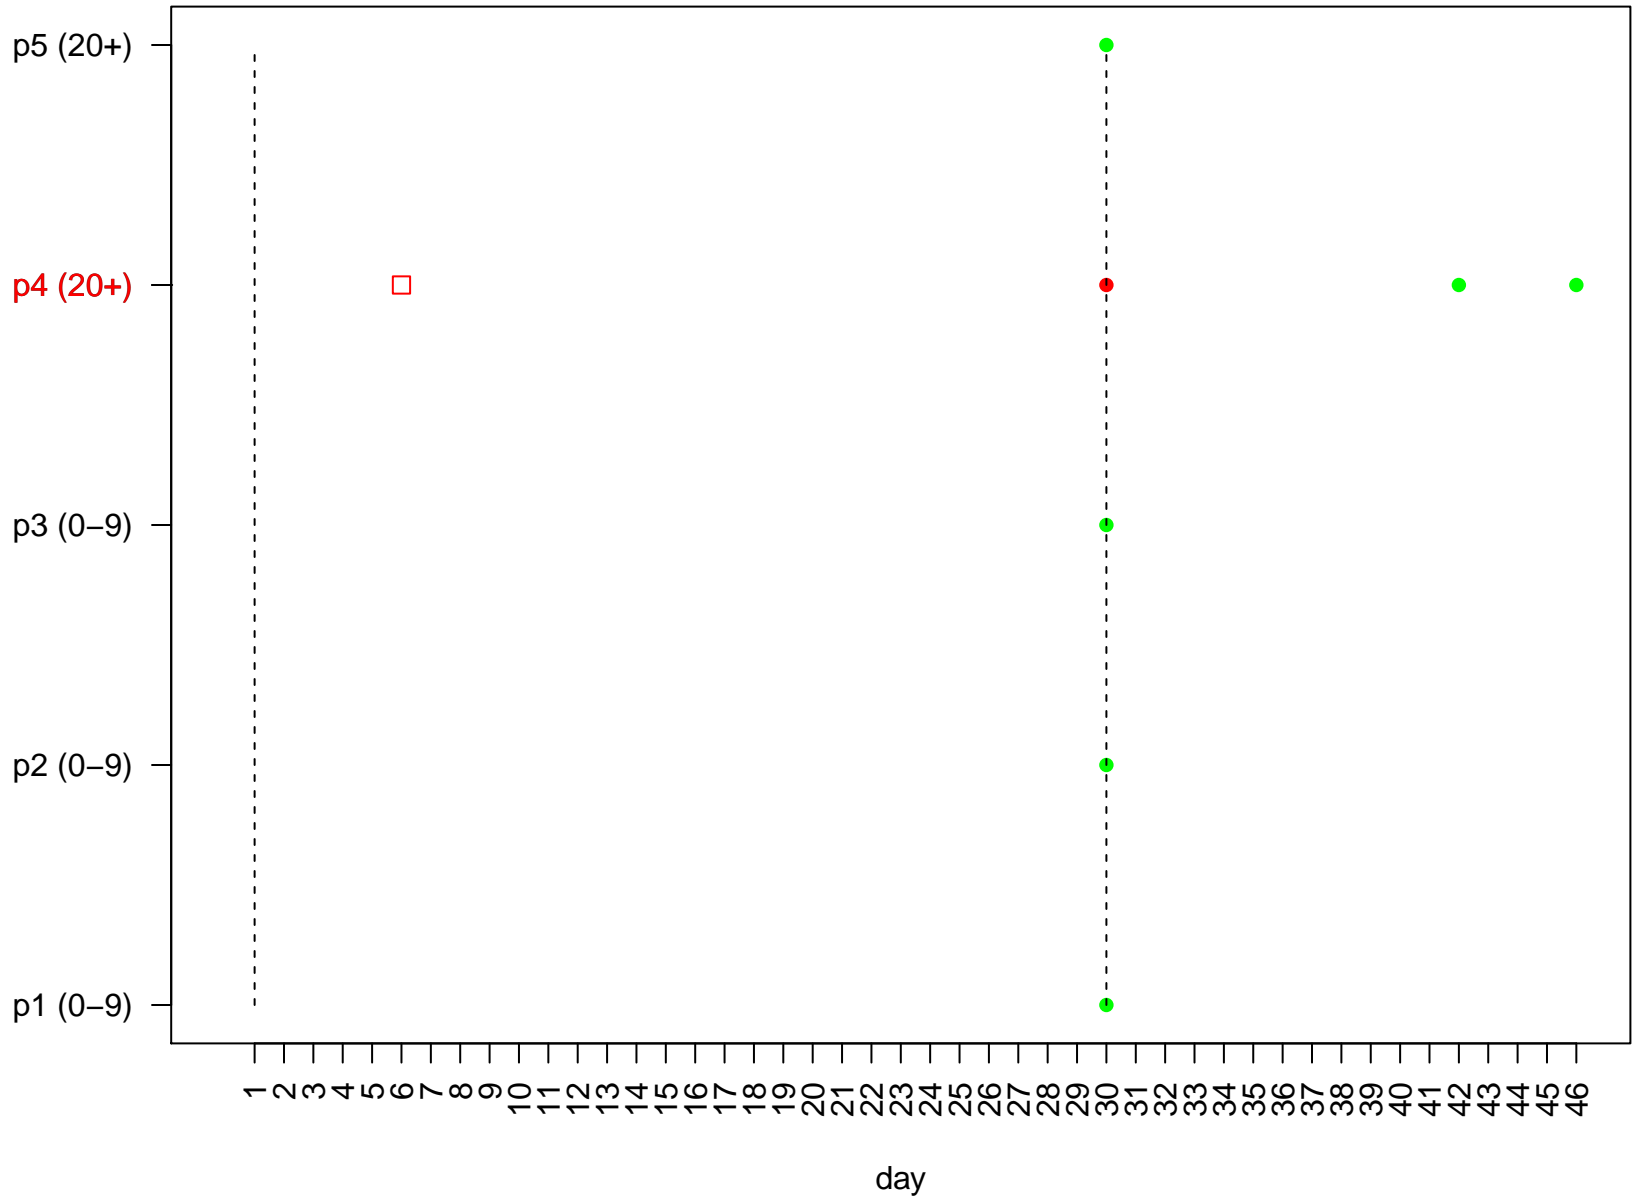

# Household 175

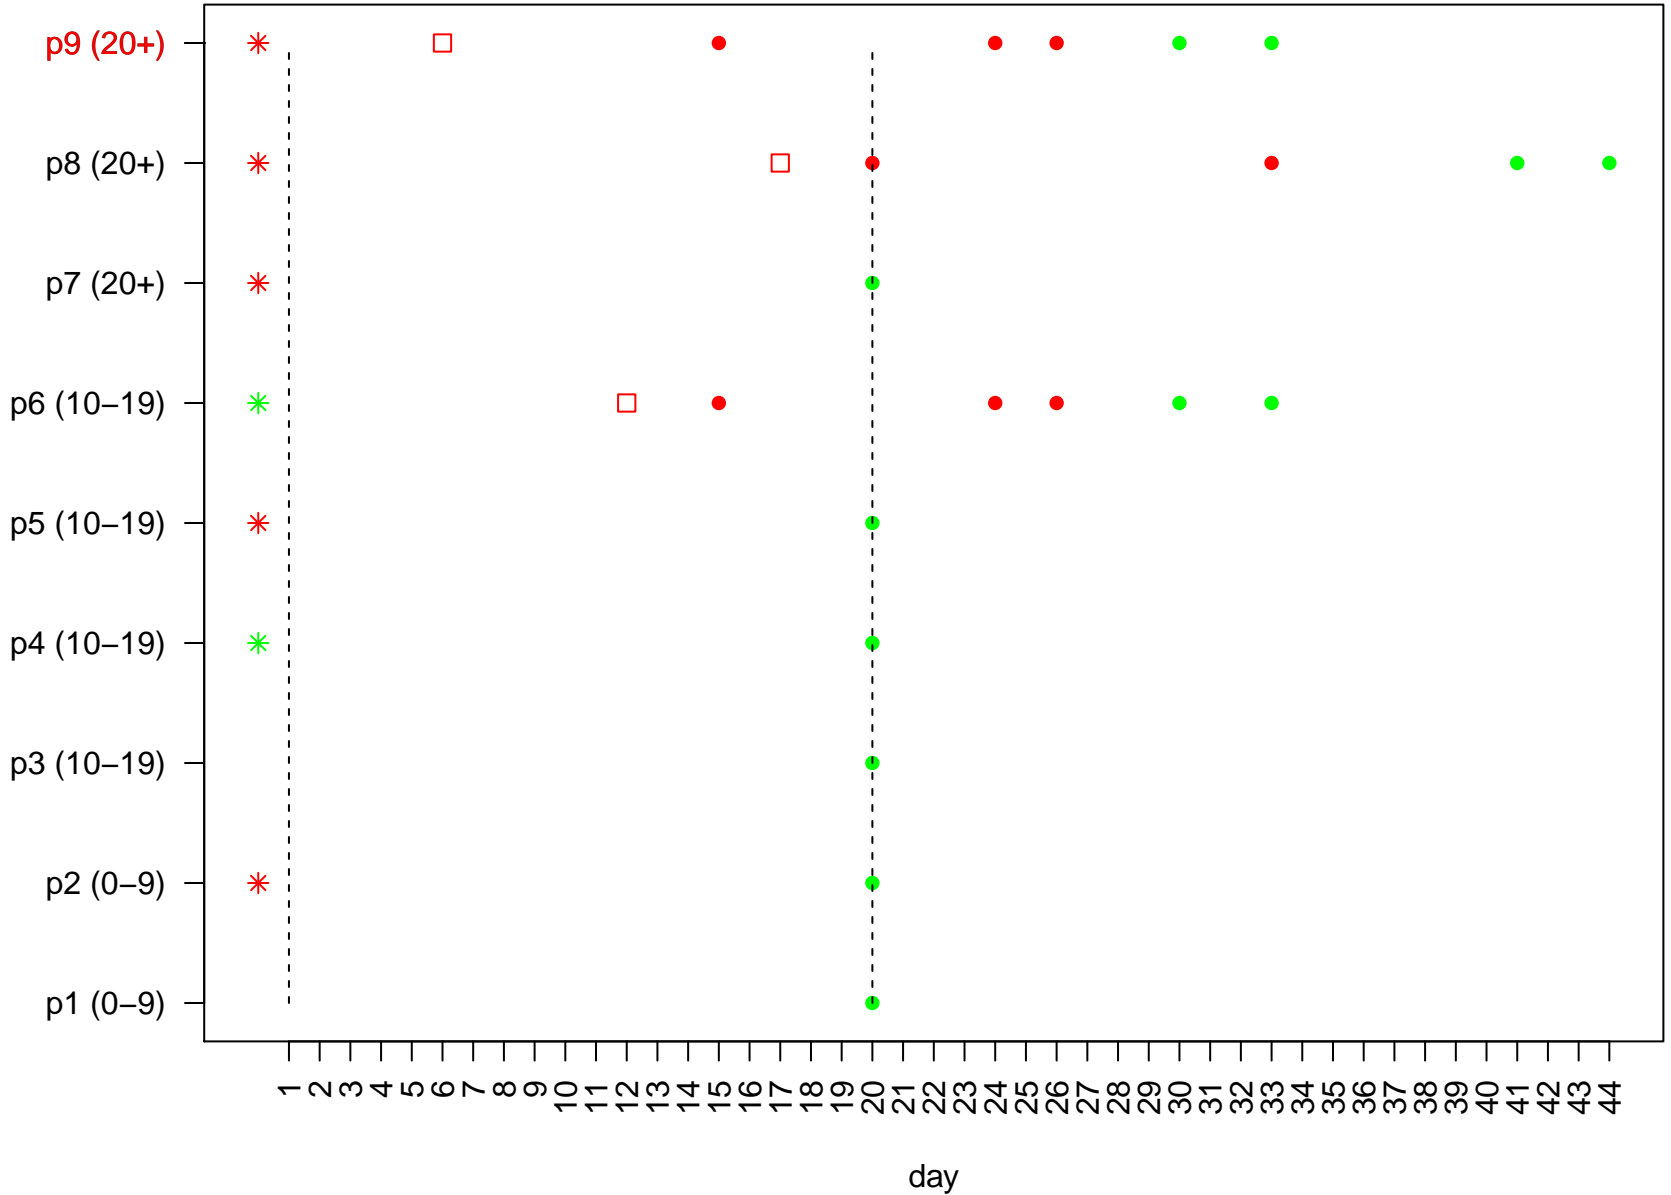

# Household 176

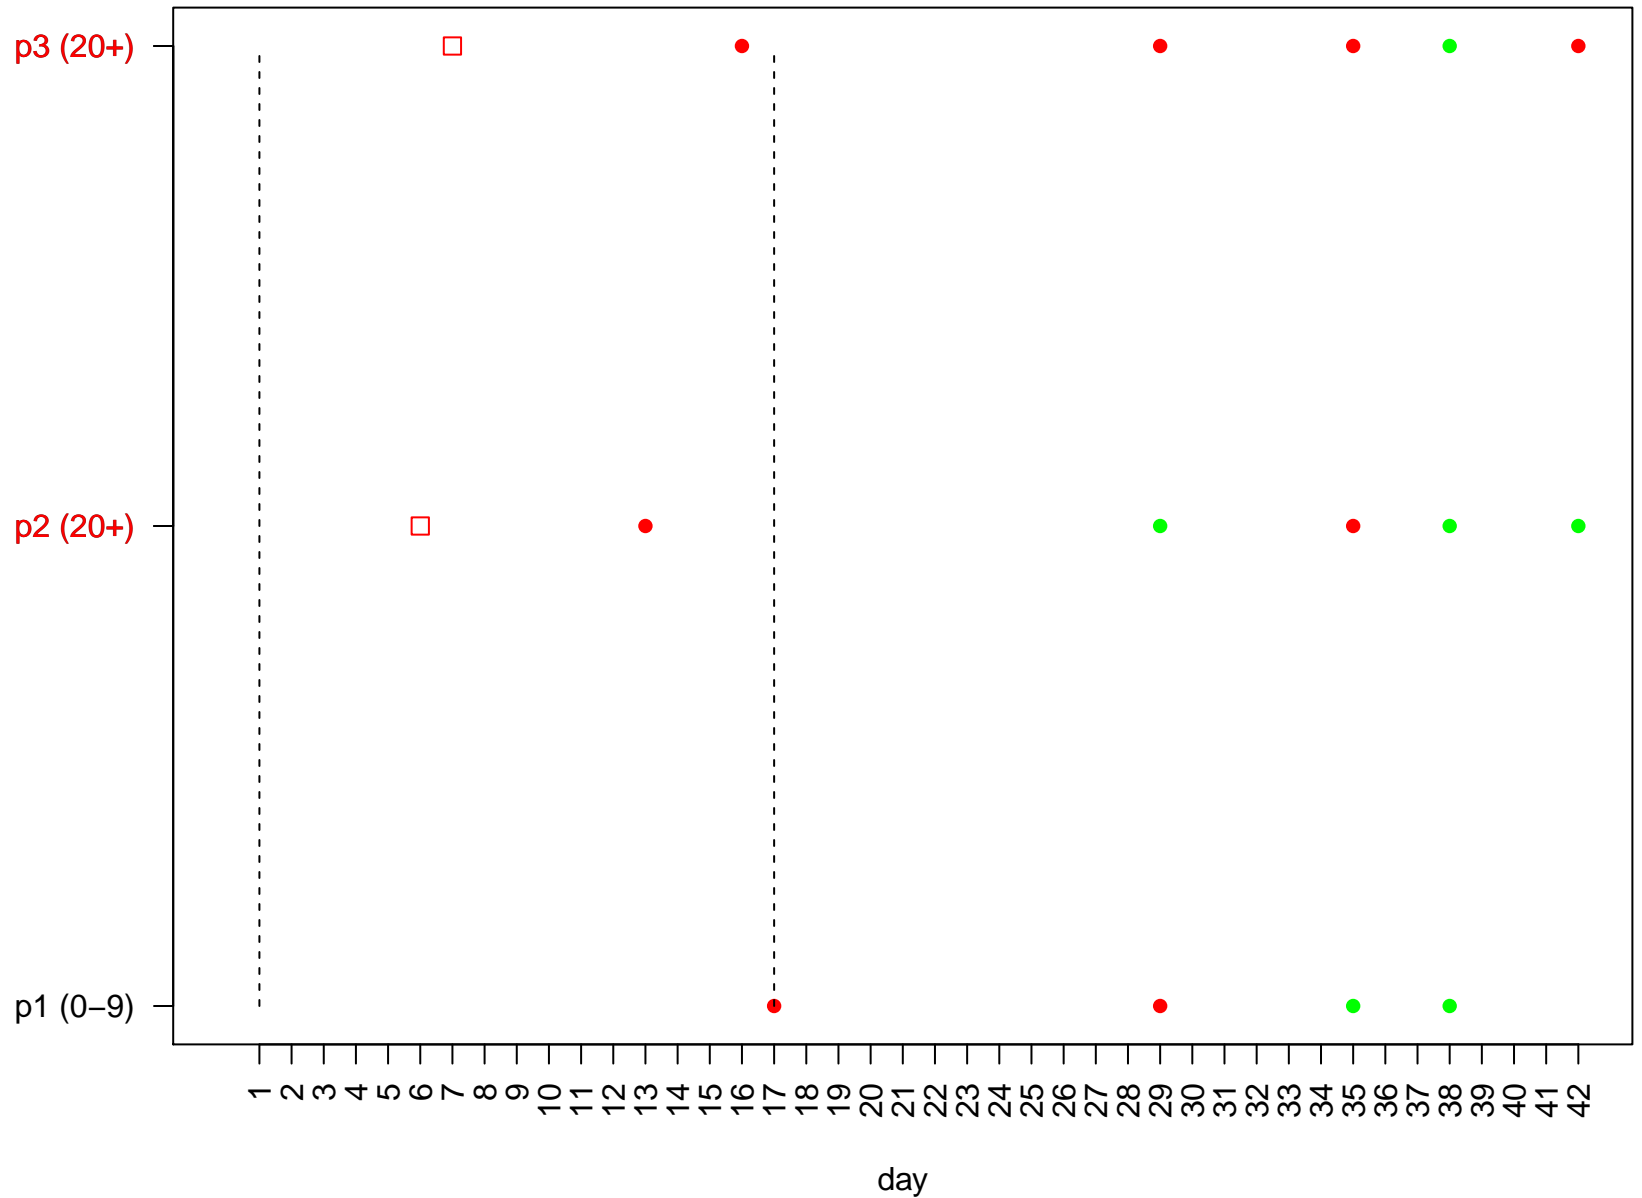





# Household 178

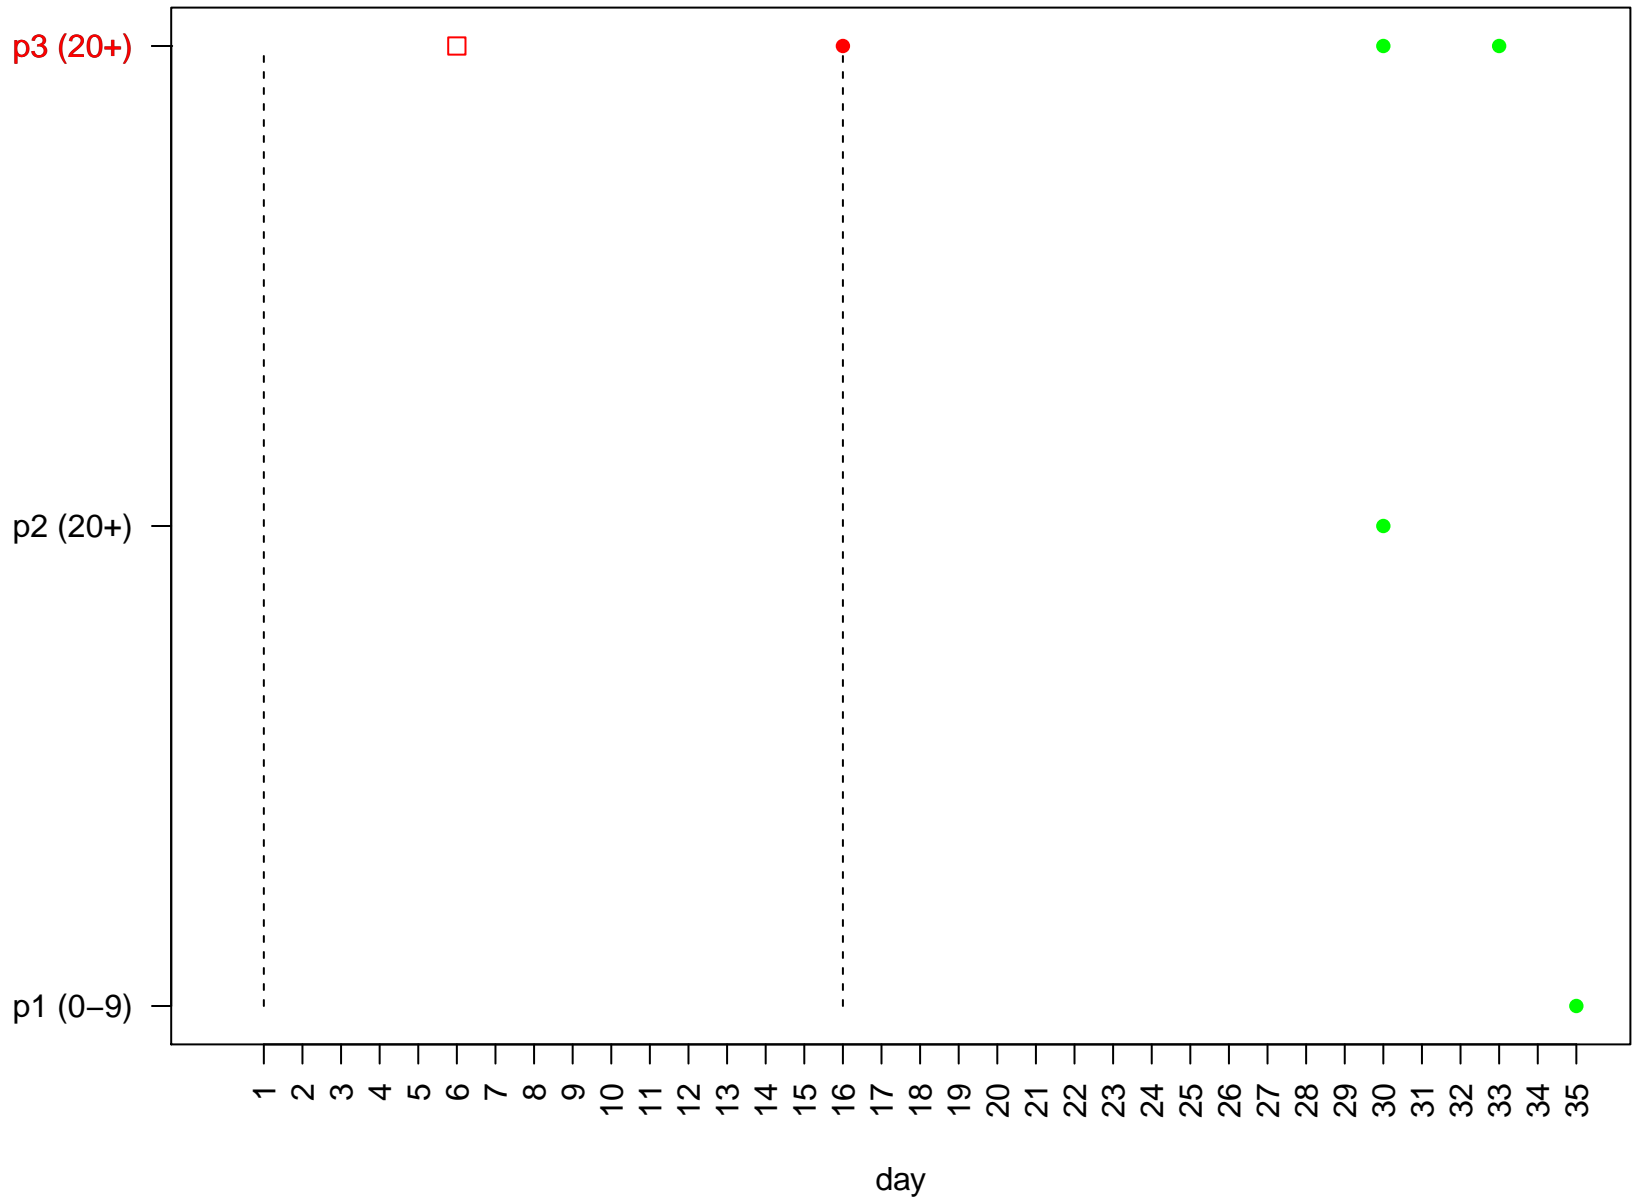

# Household 179

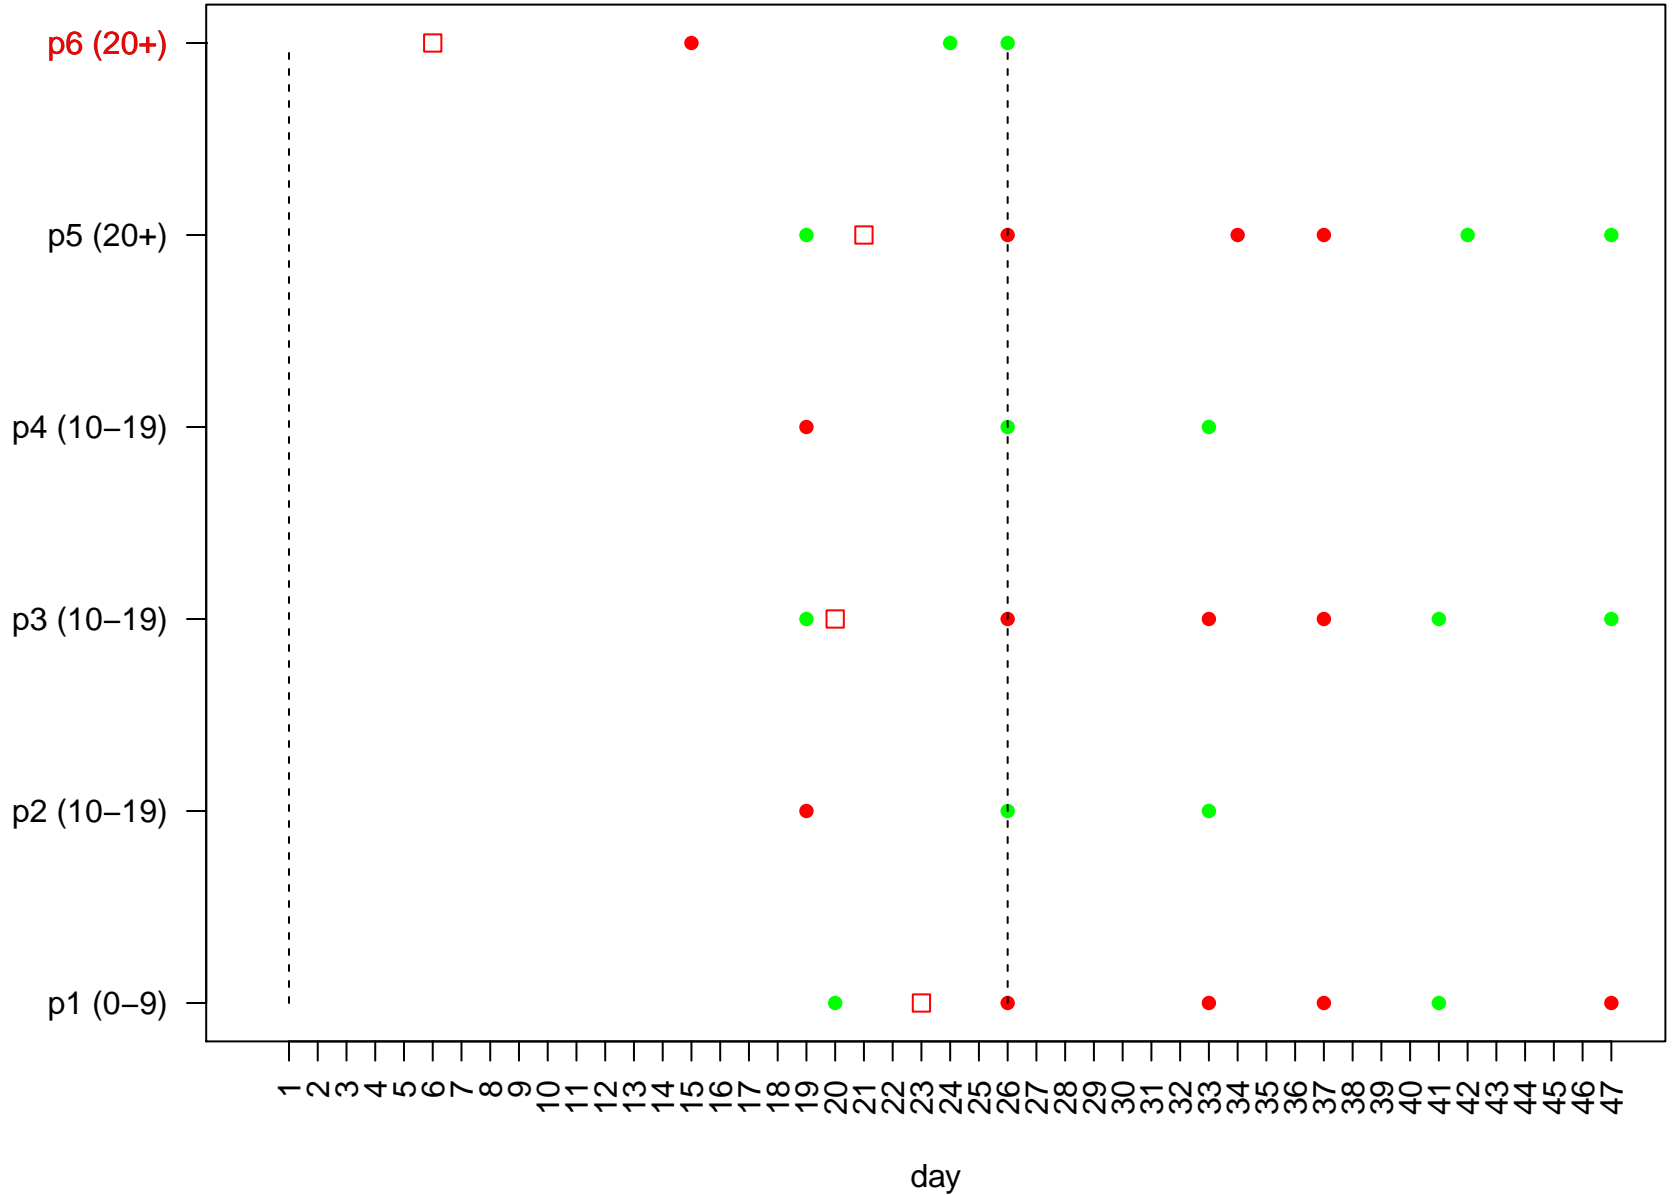

# Household 180

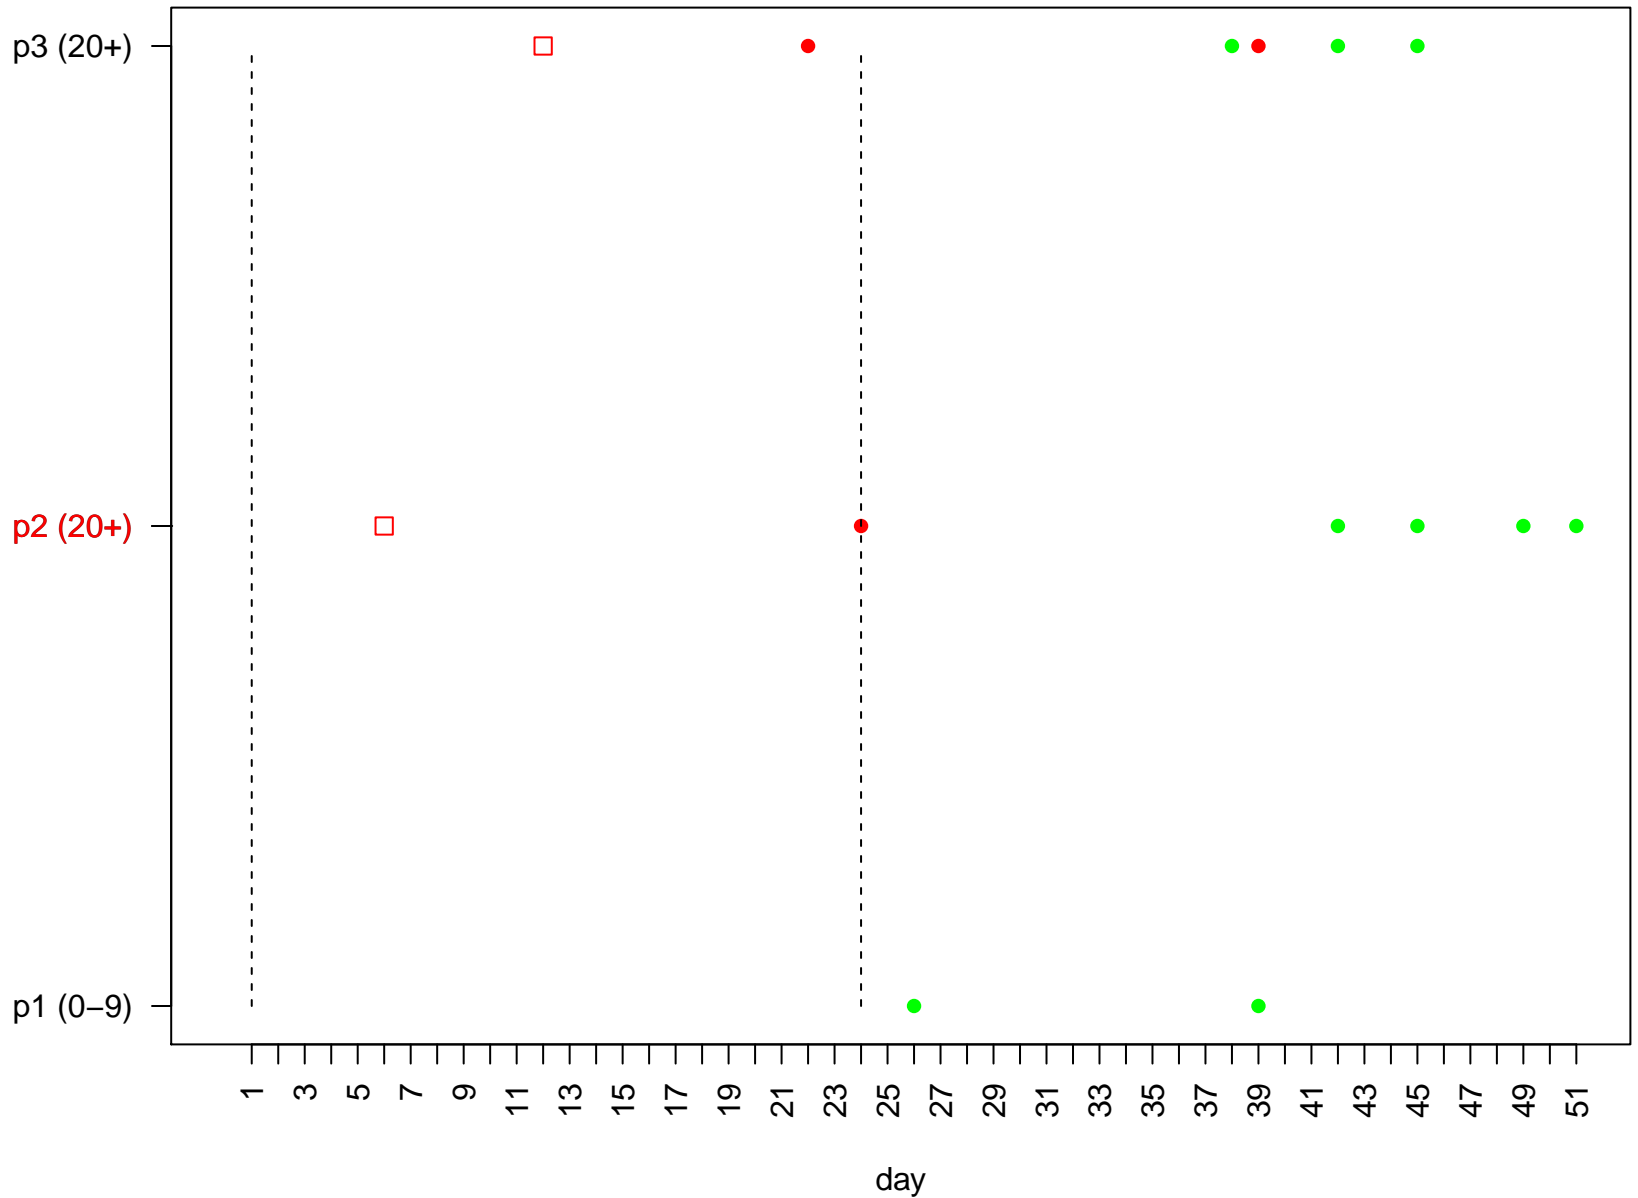

# Household 181

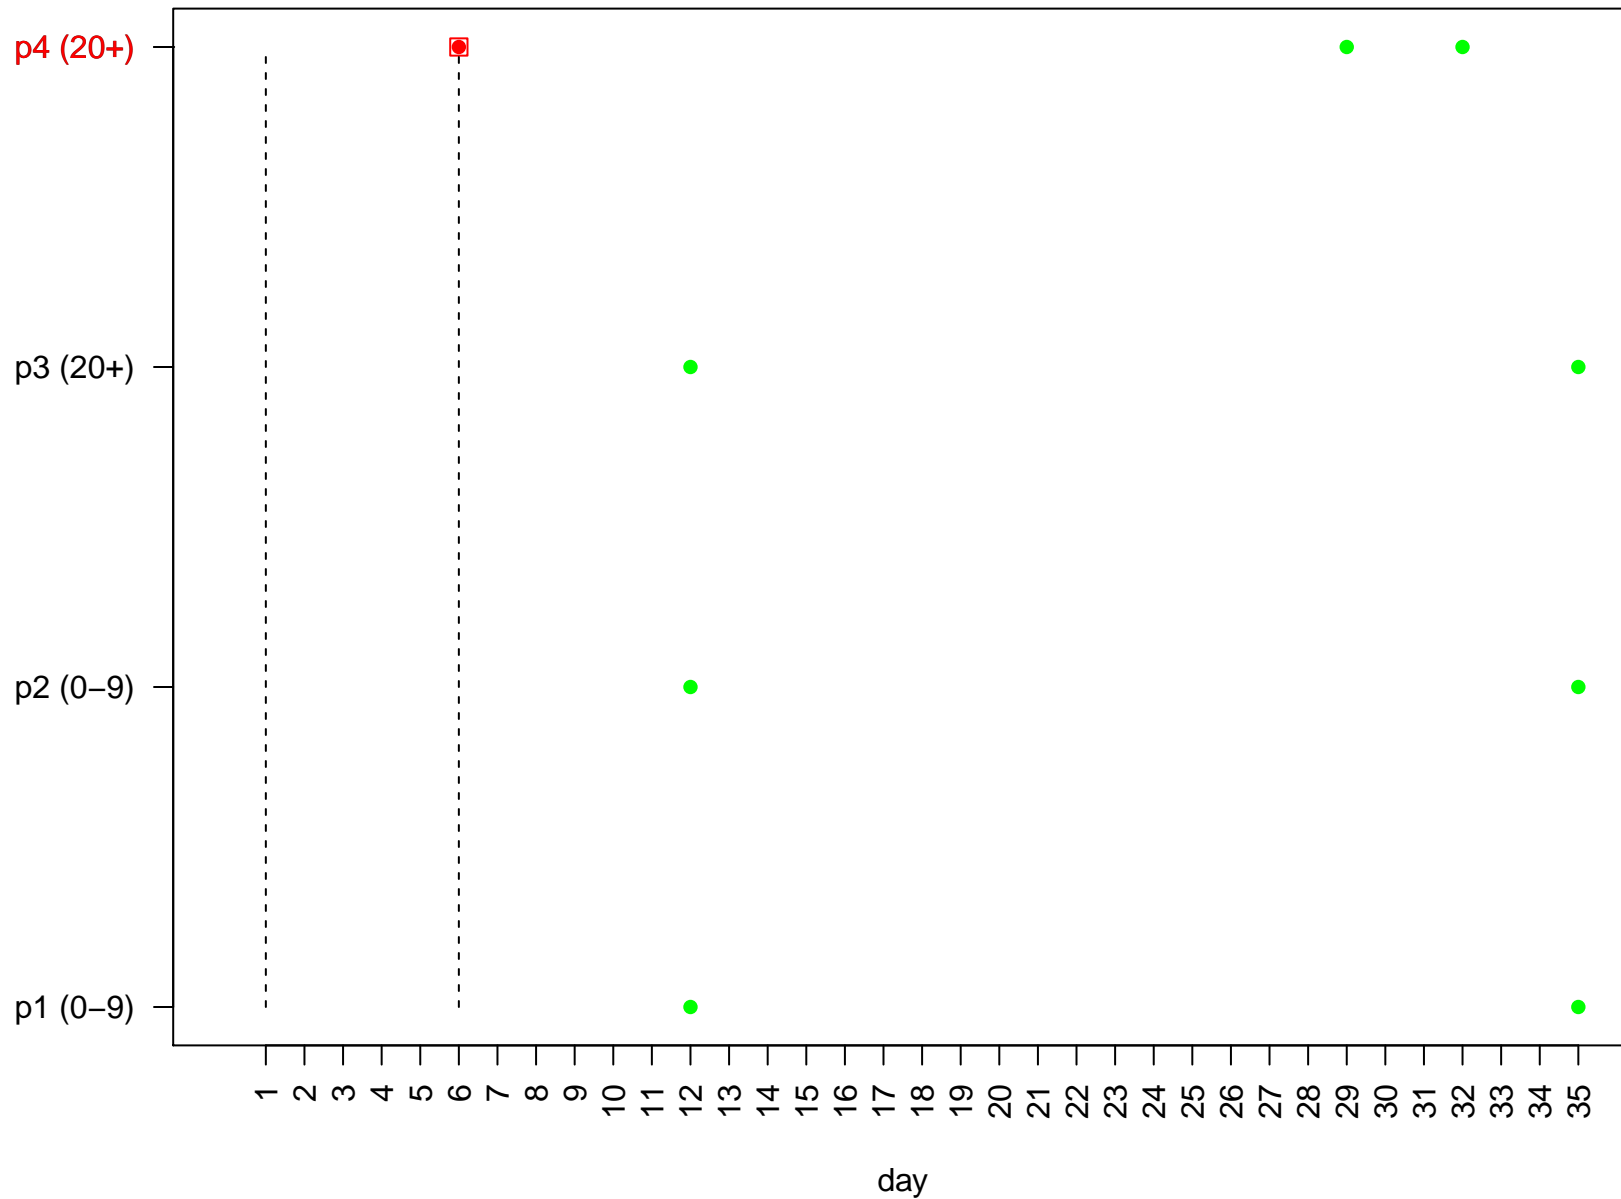

# Household 182

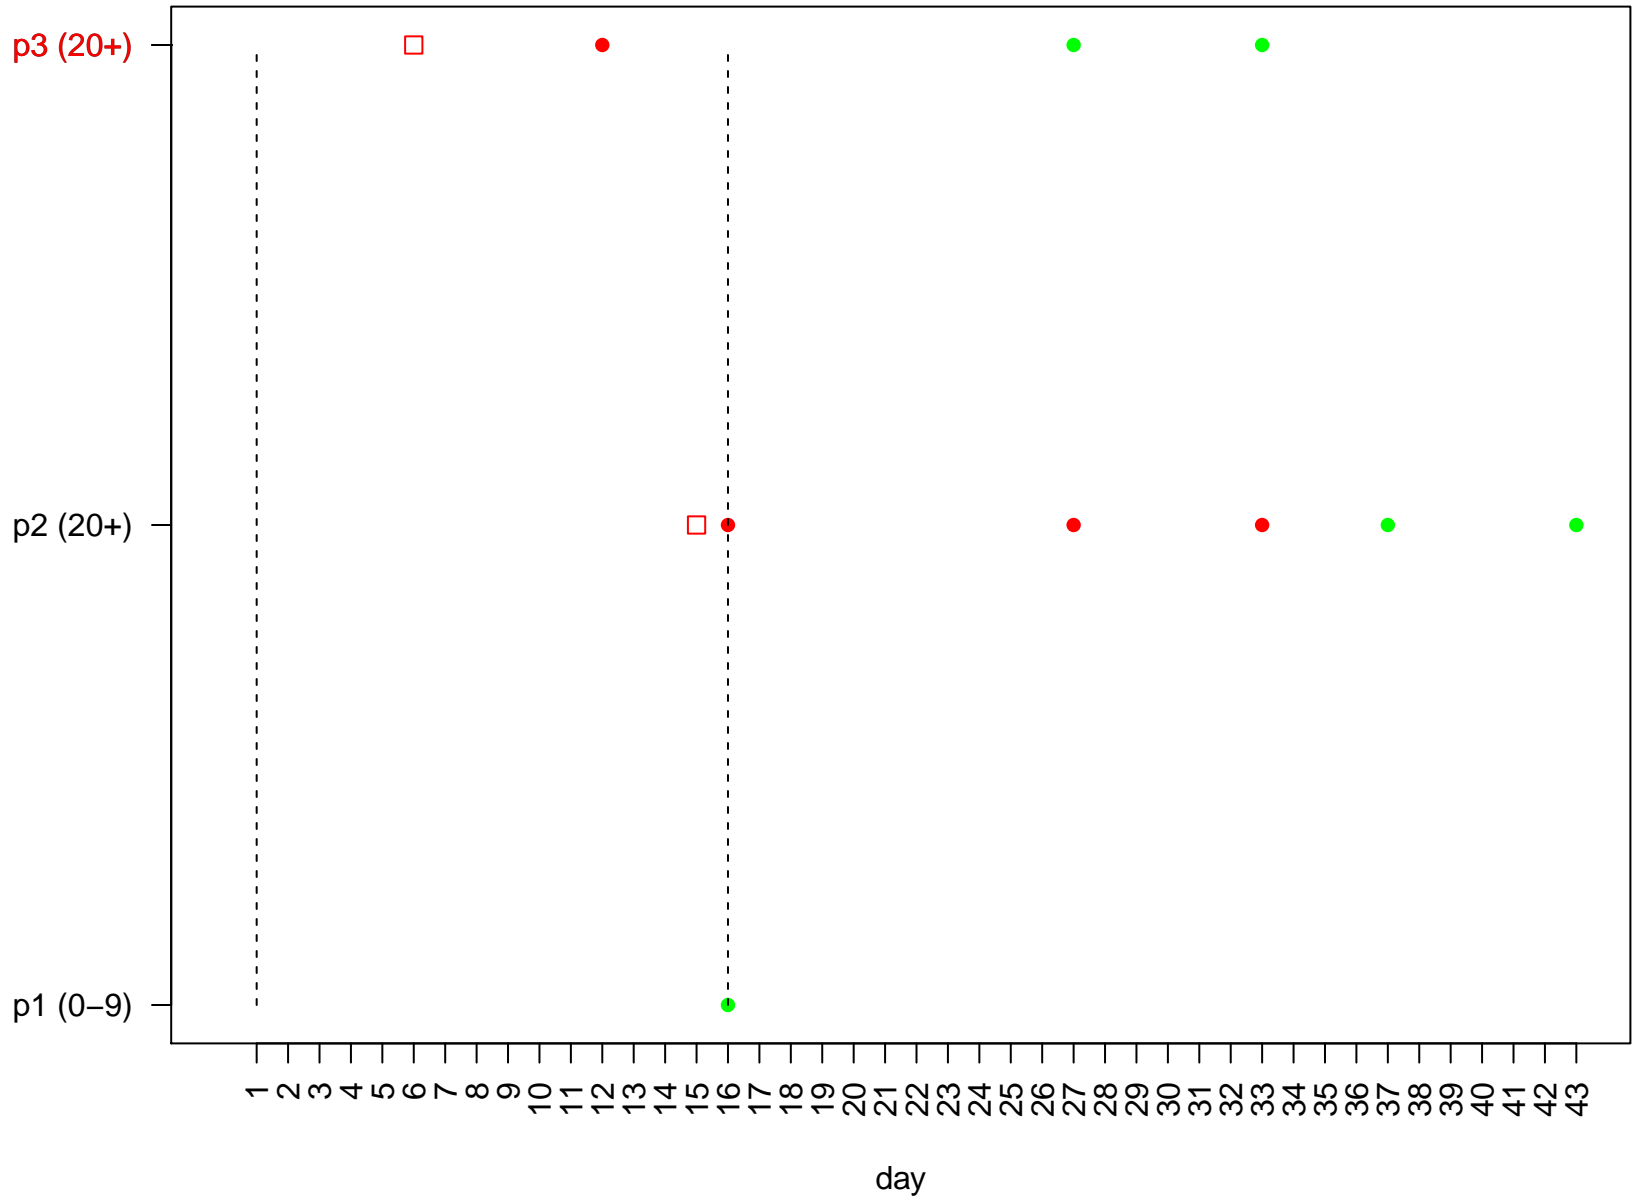

# Household 183

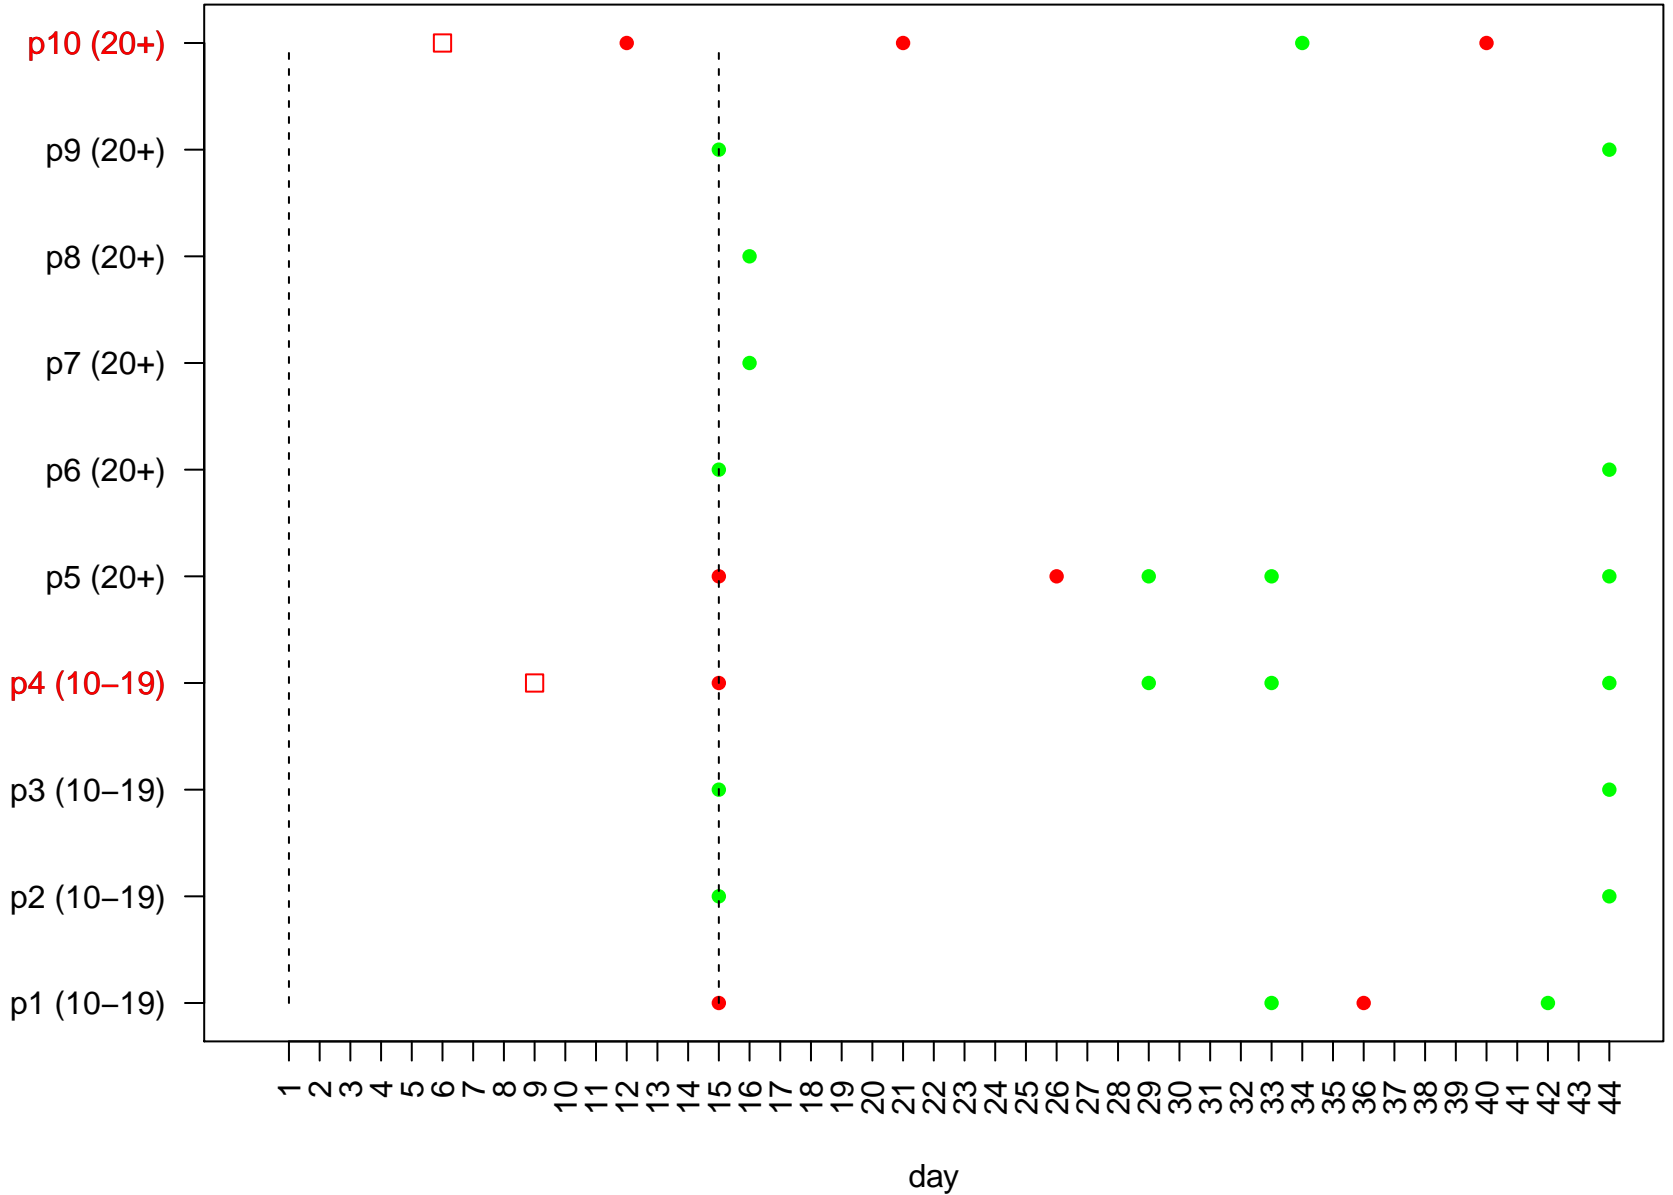

# Household 184

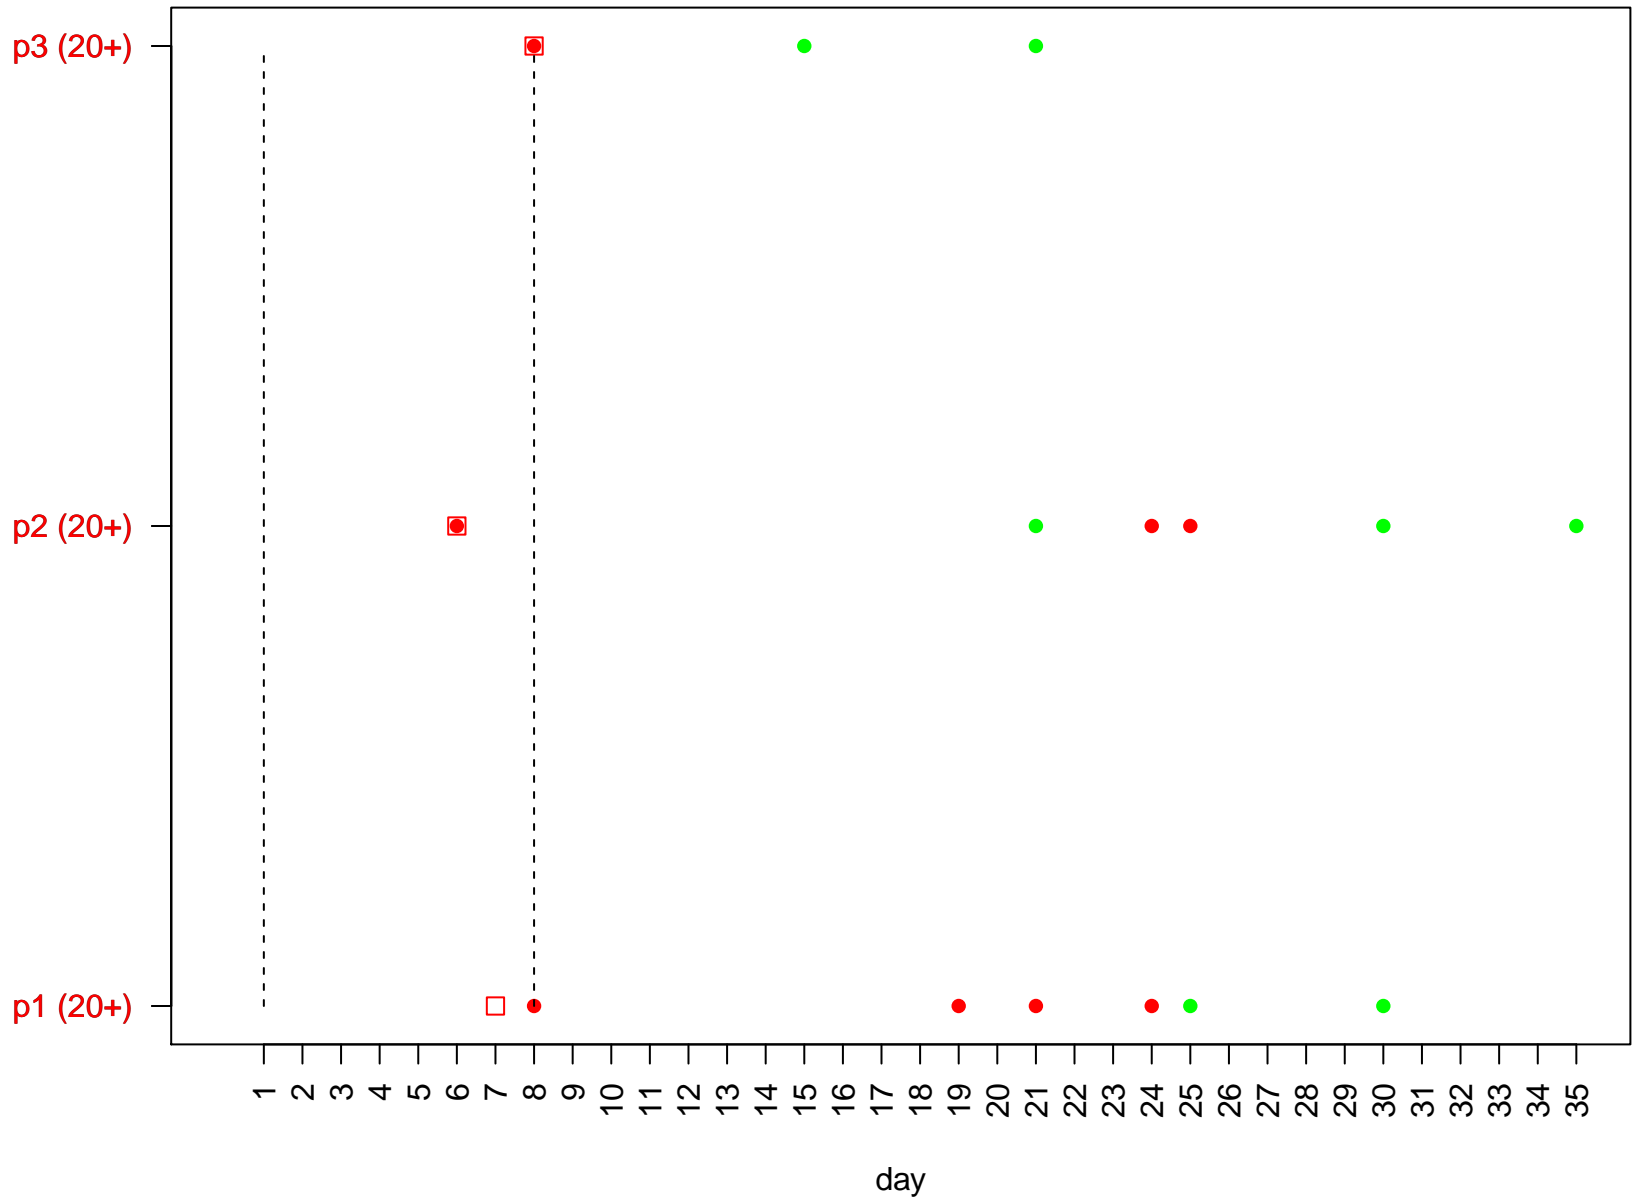



# Household 185

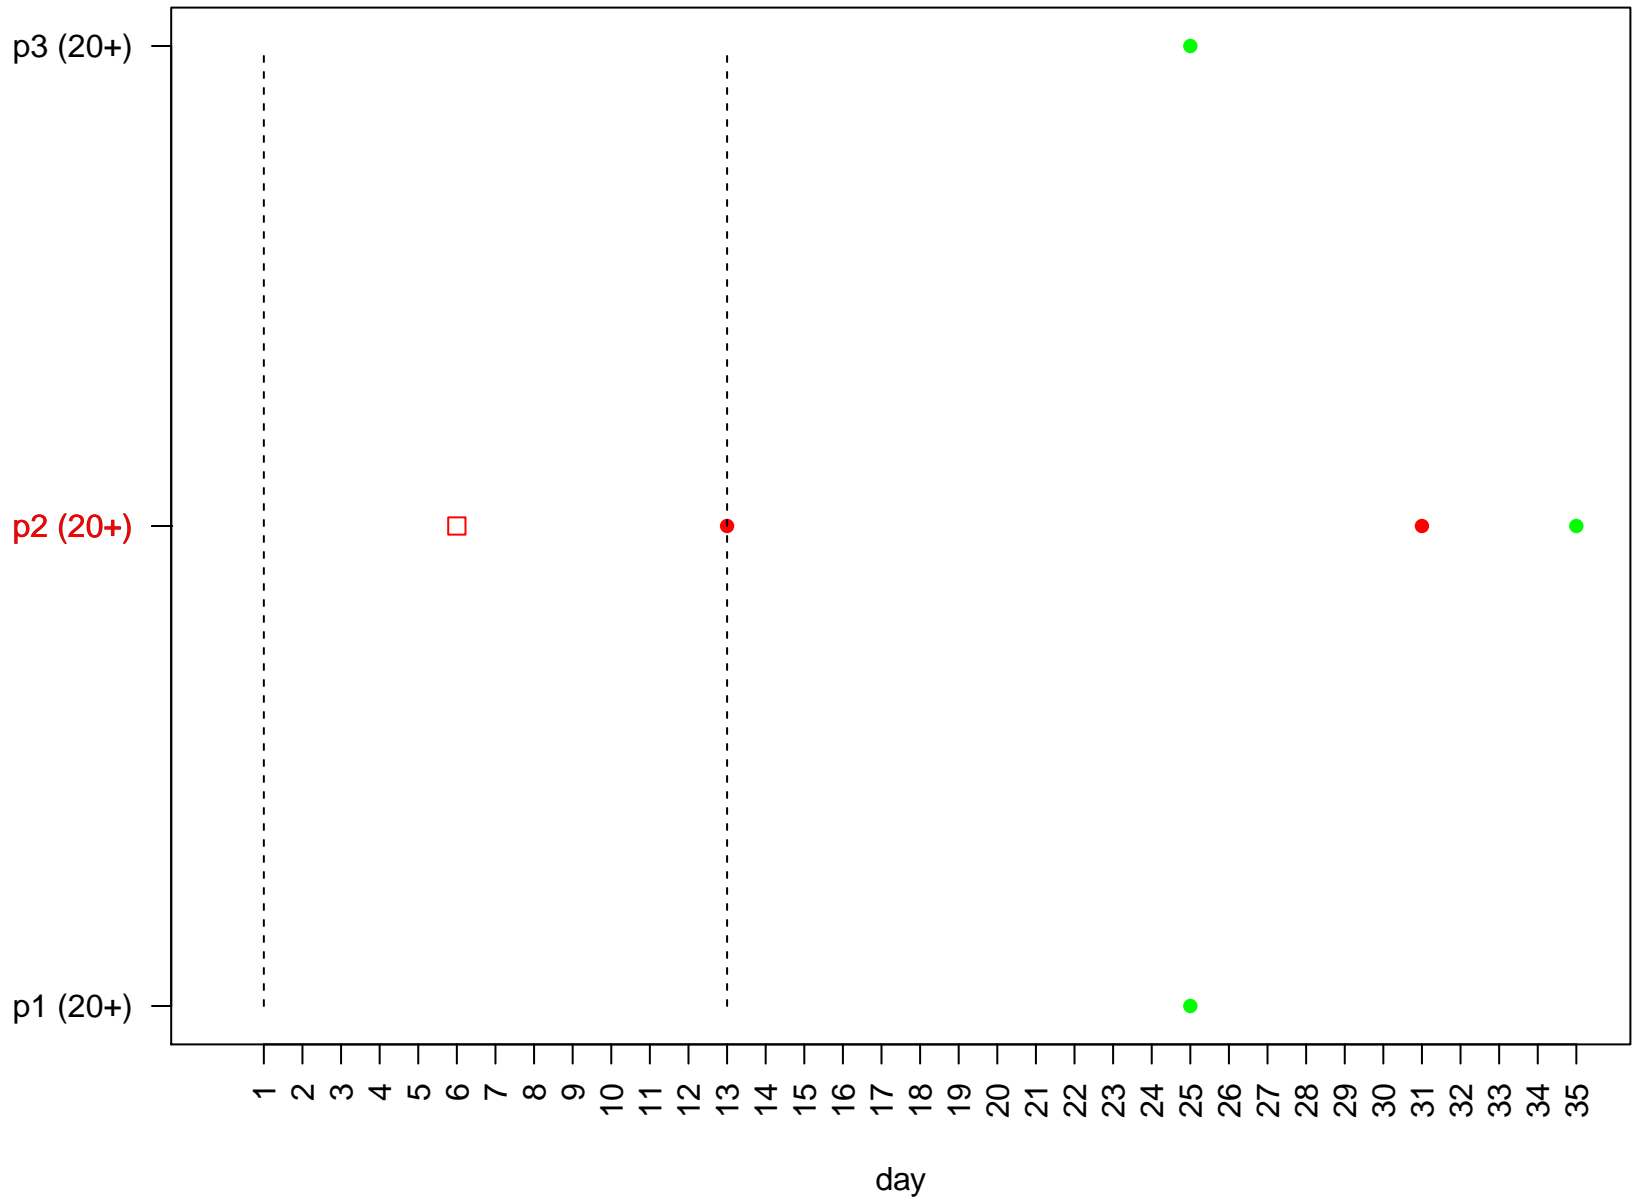

# Household 186

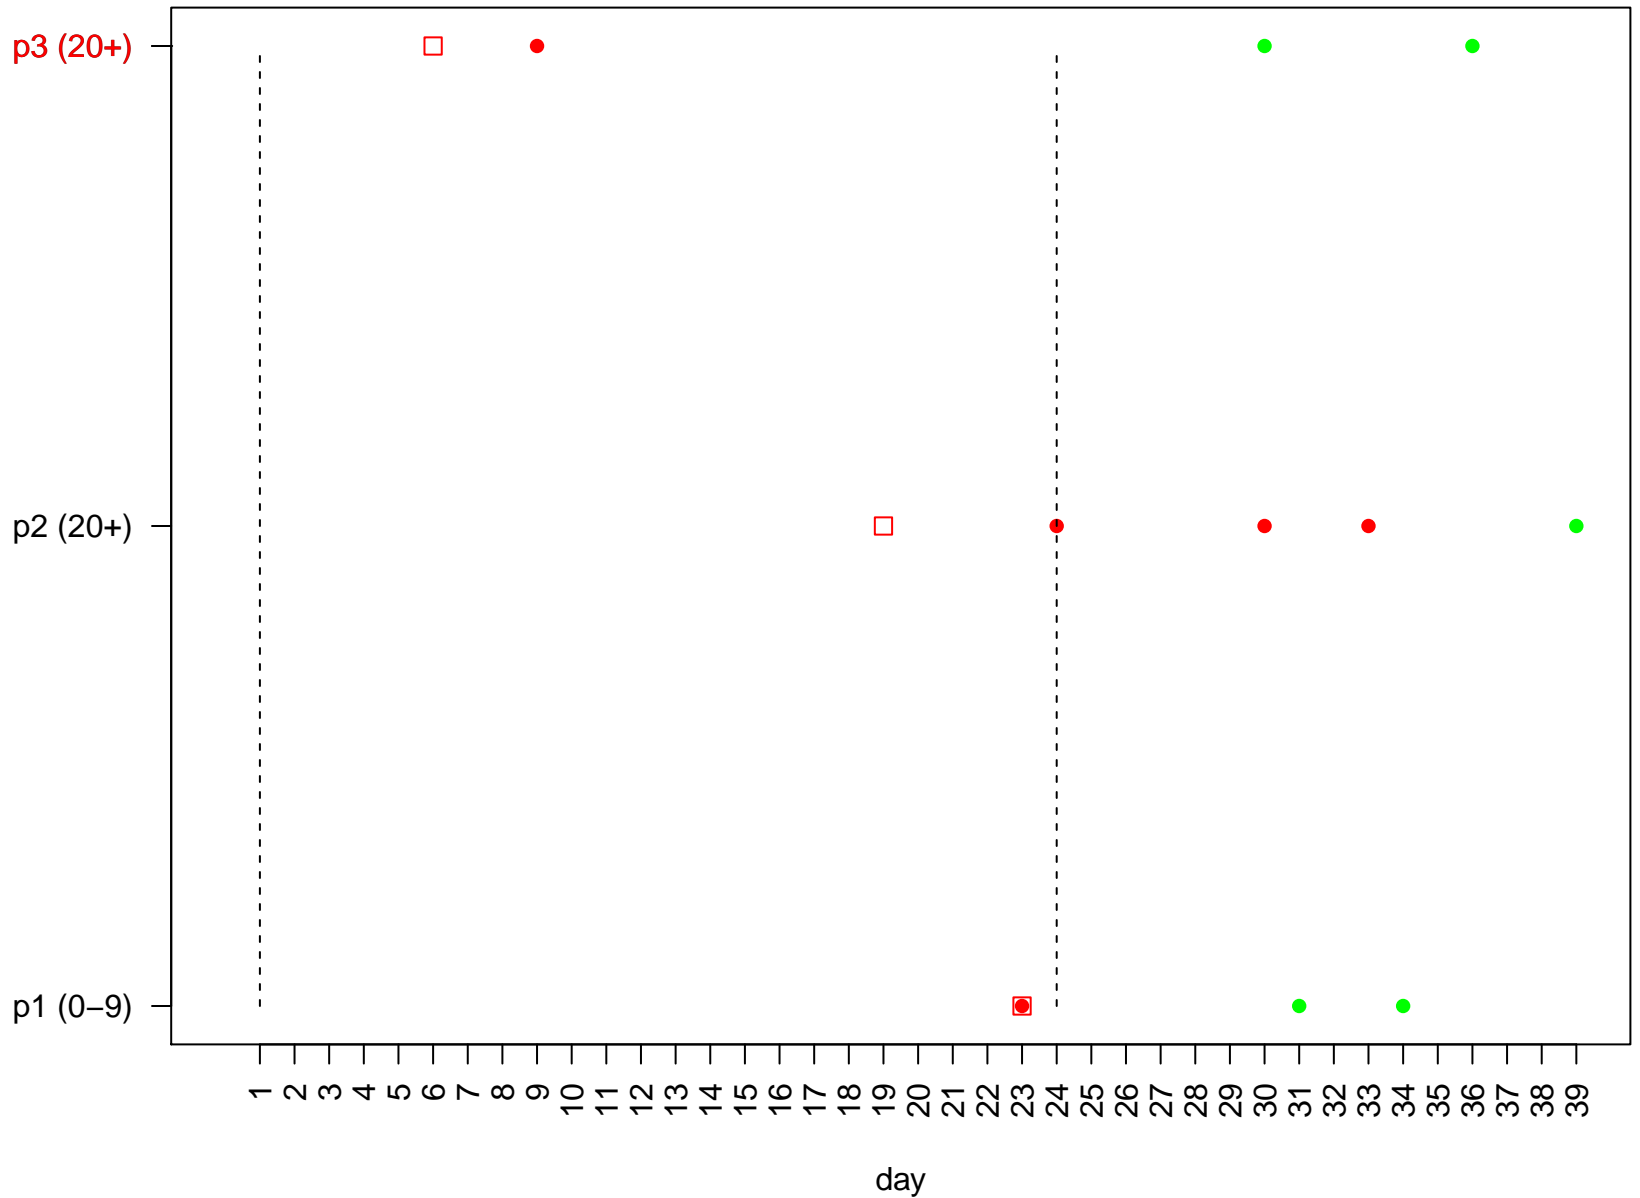

# Household 187

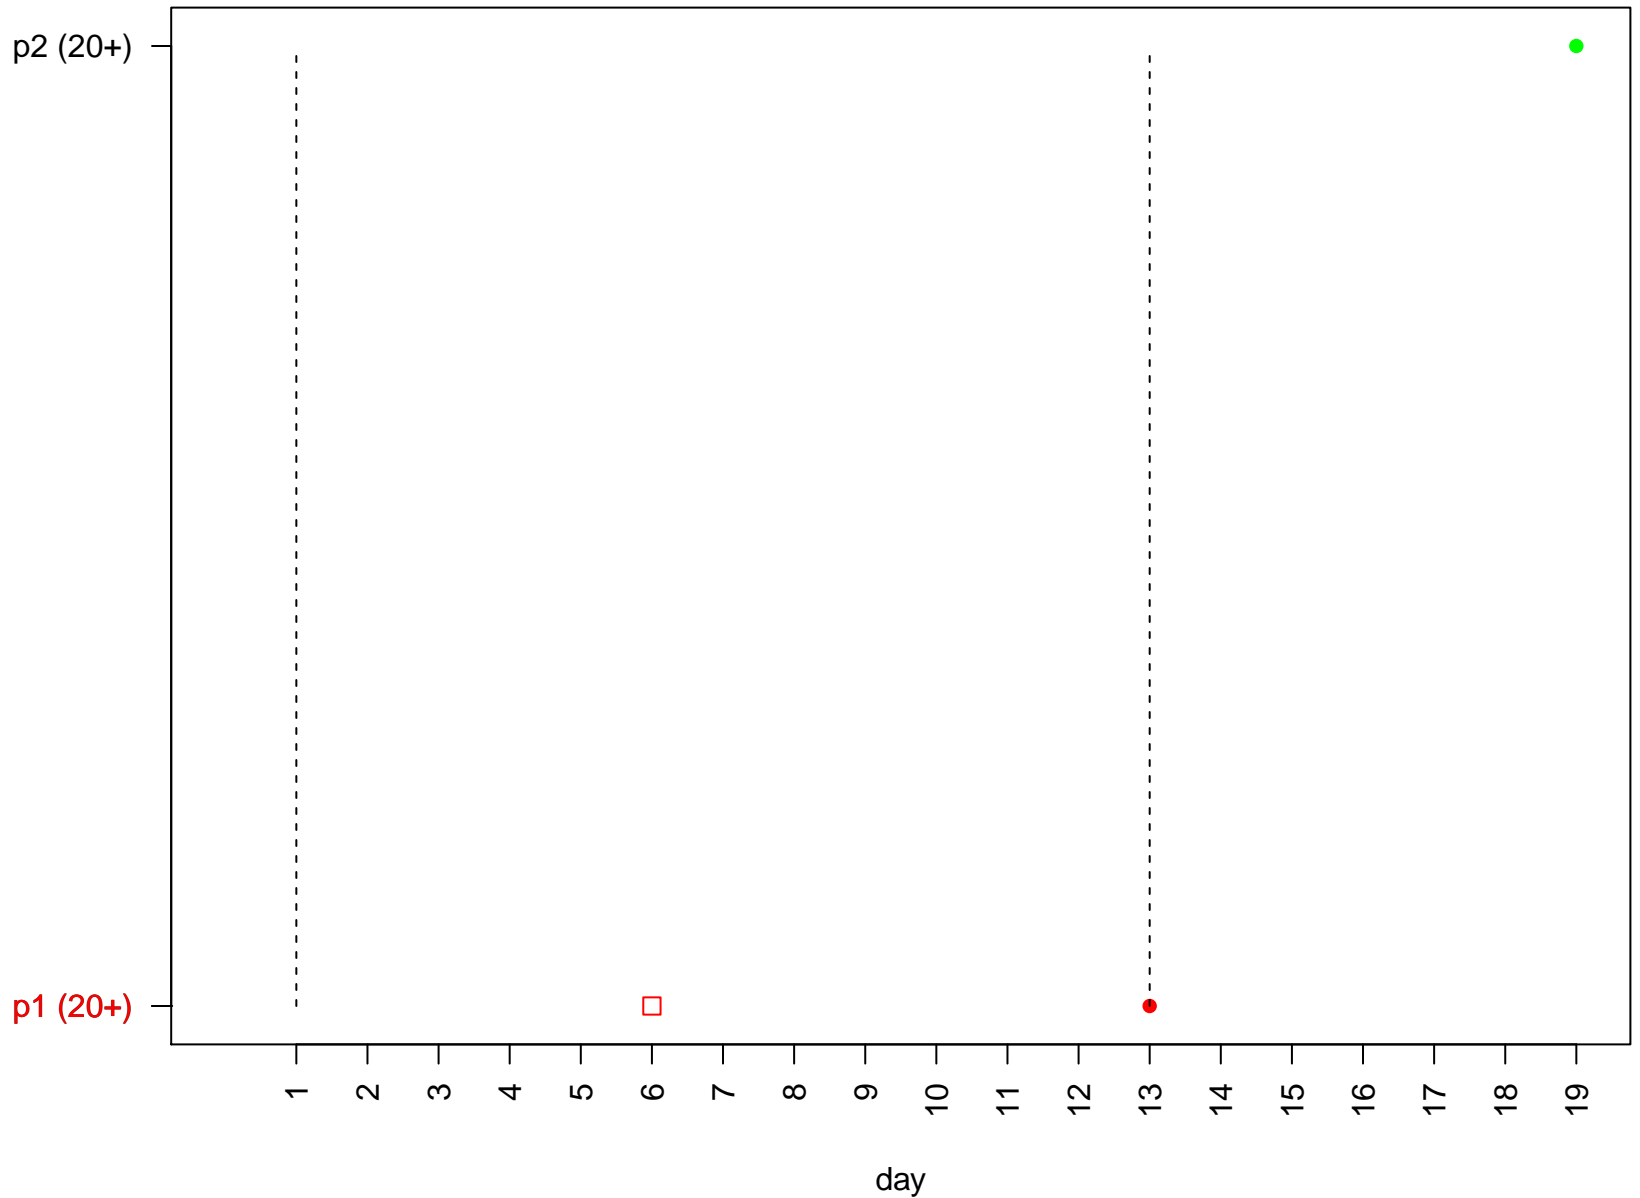

# Household 188

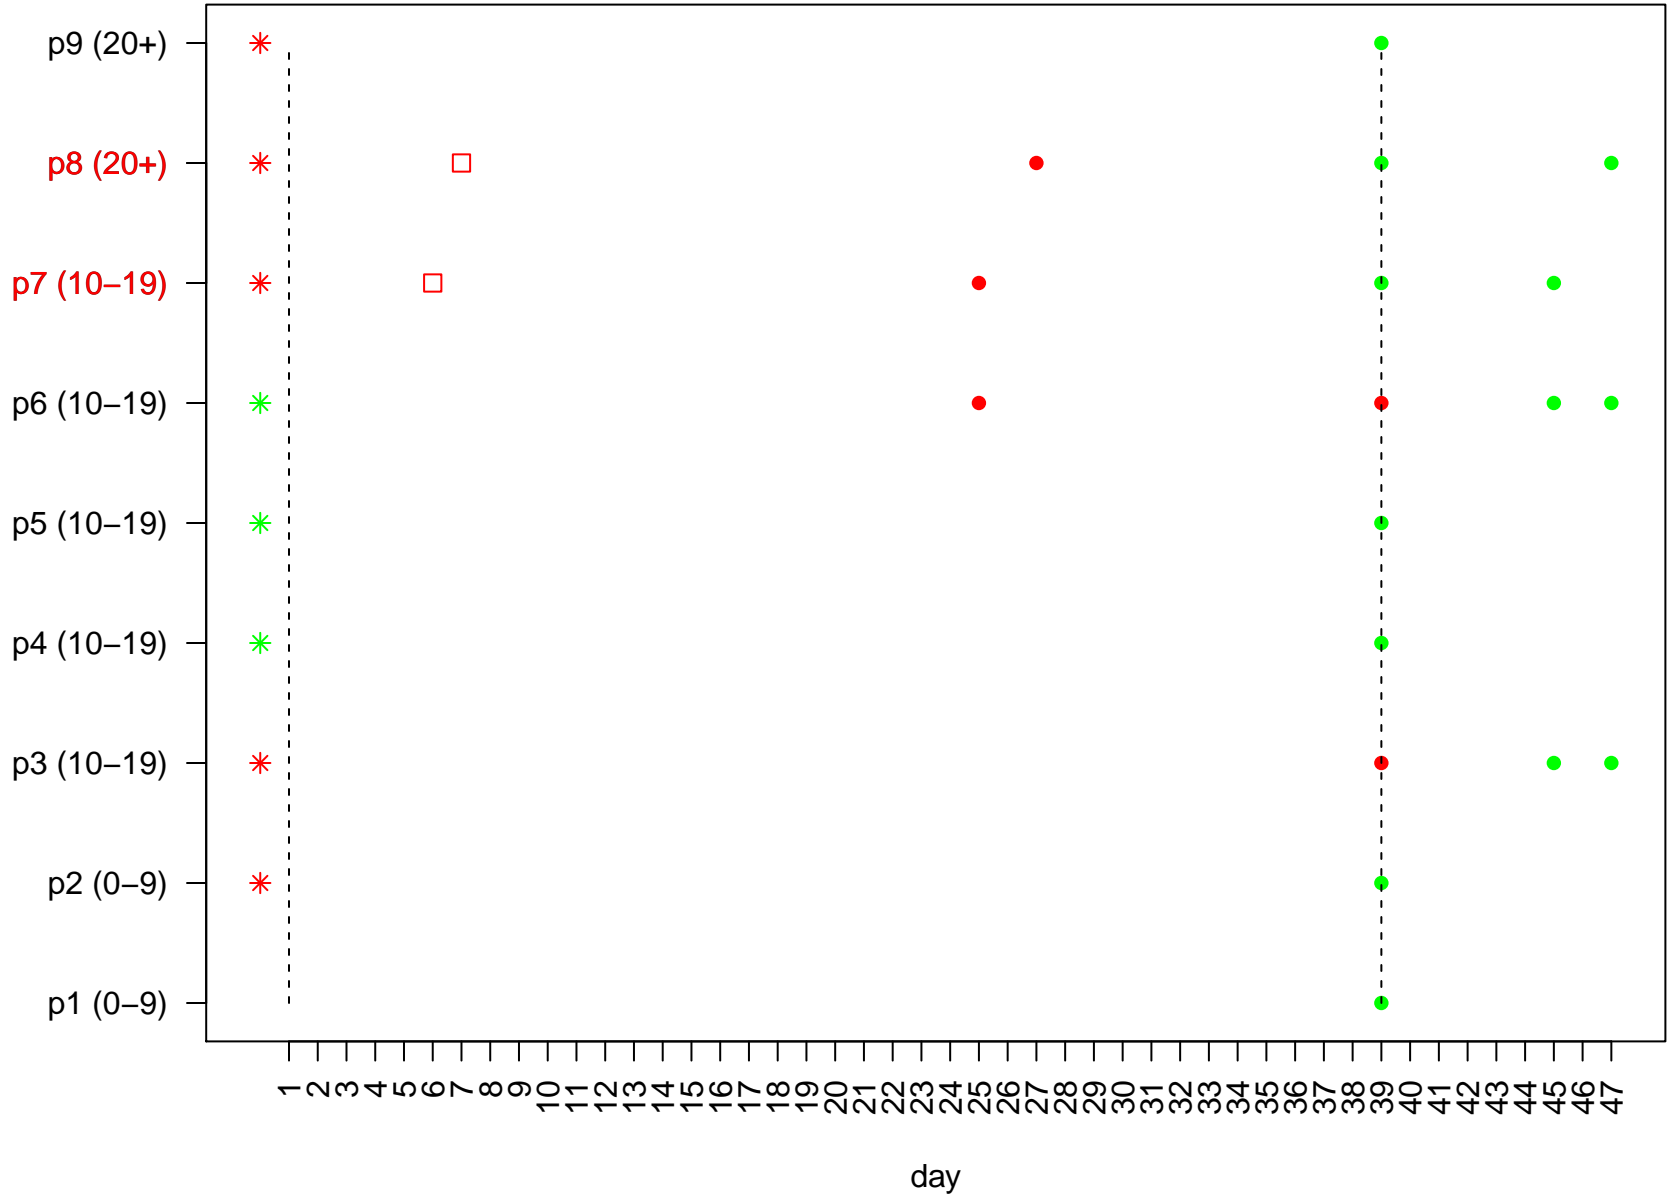

# Household 190

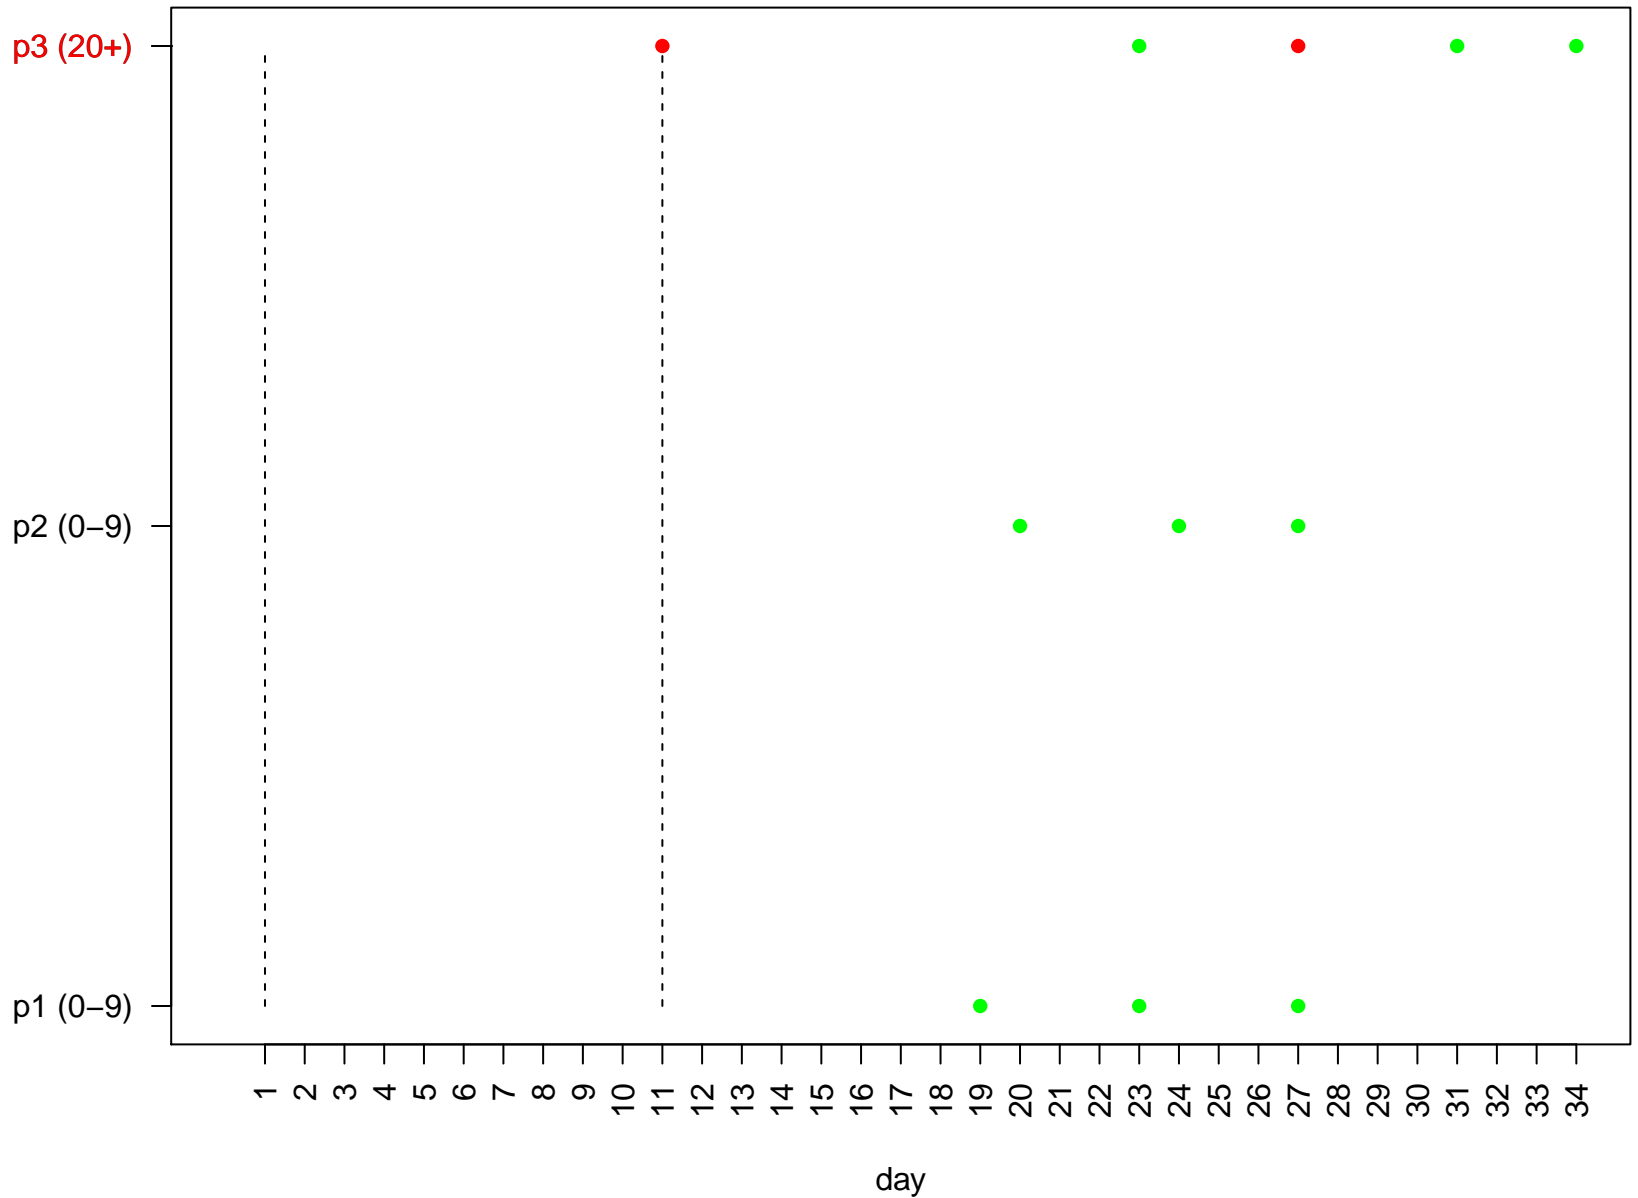

# Household 192

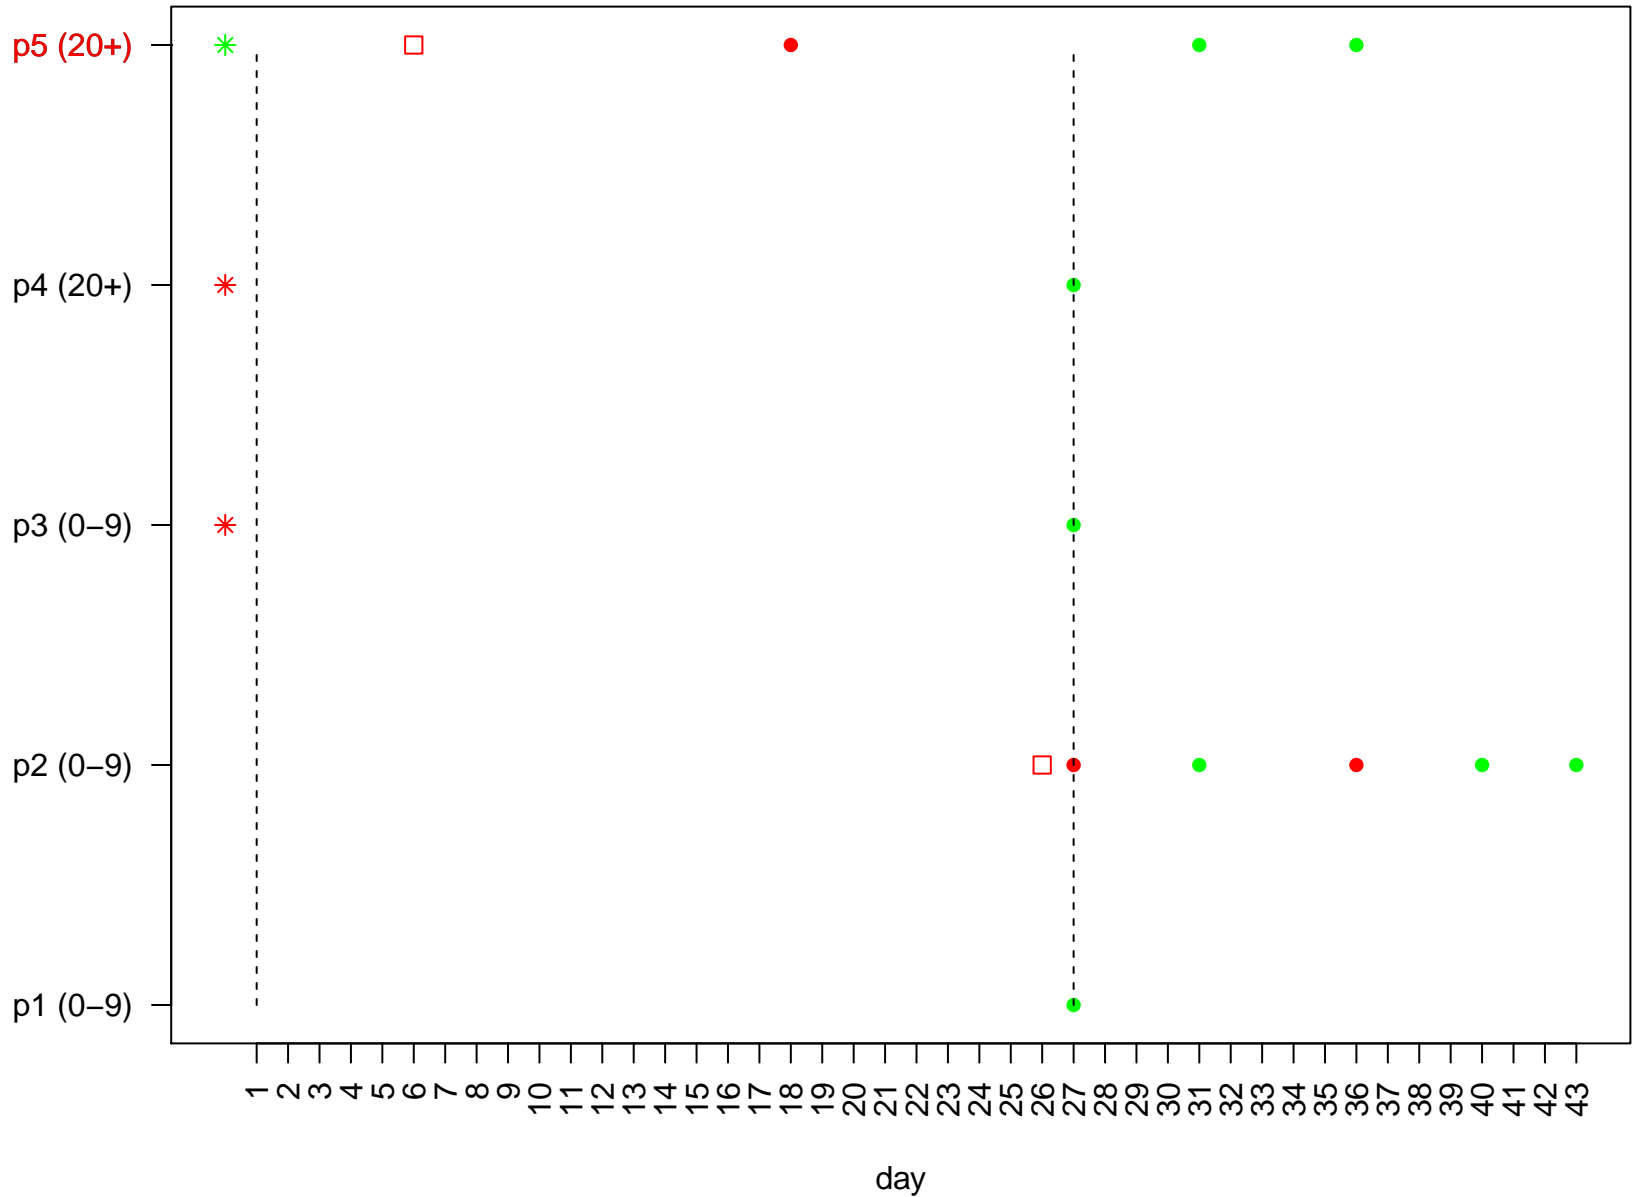

# Household 193

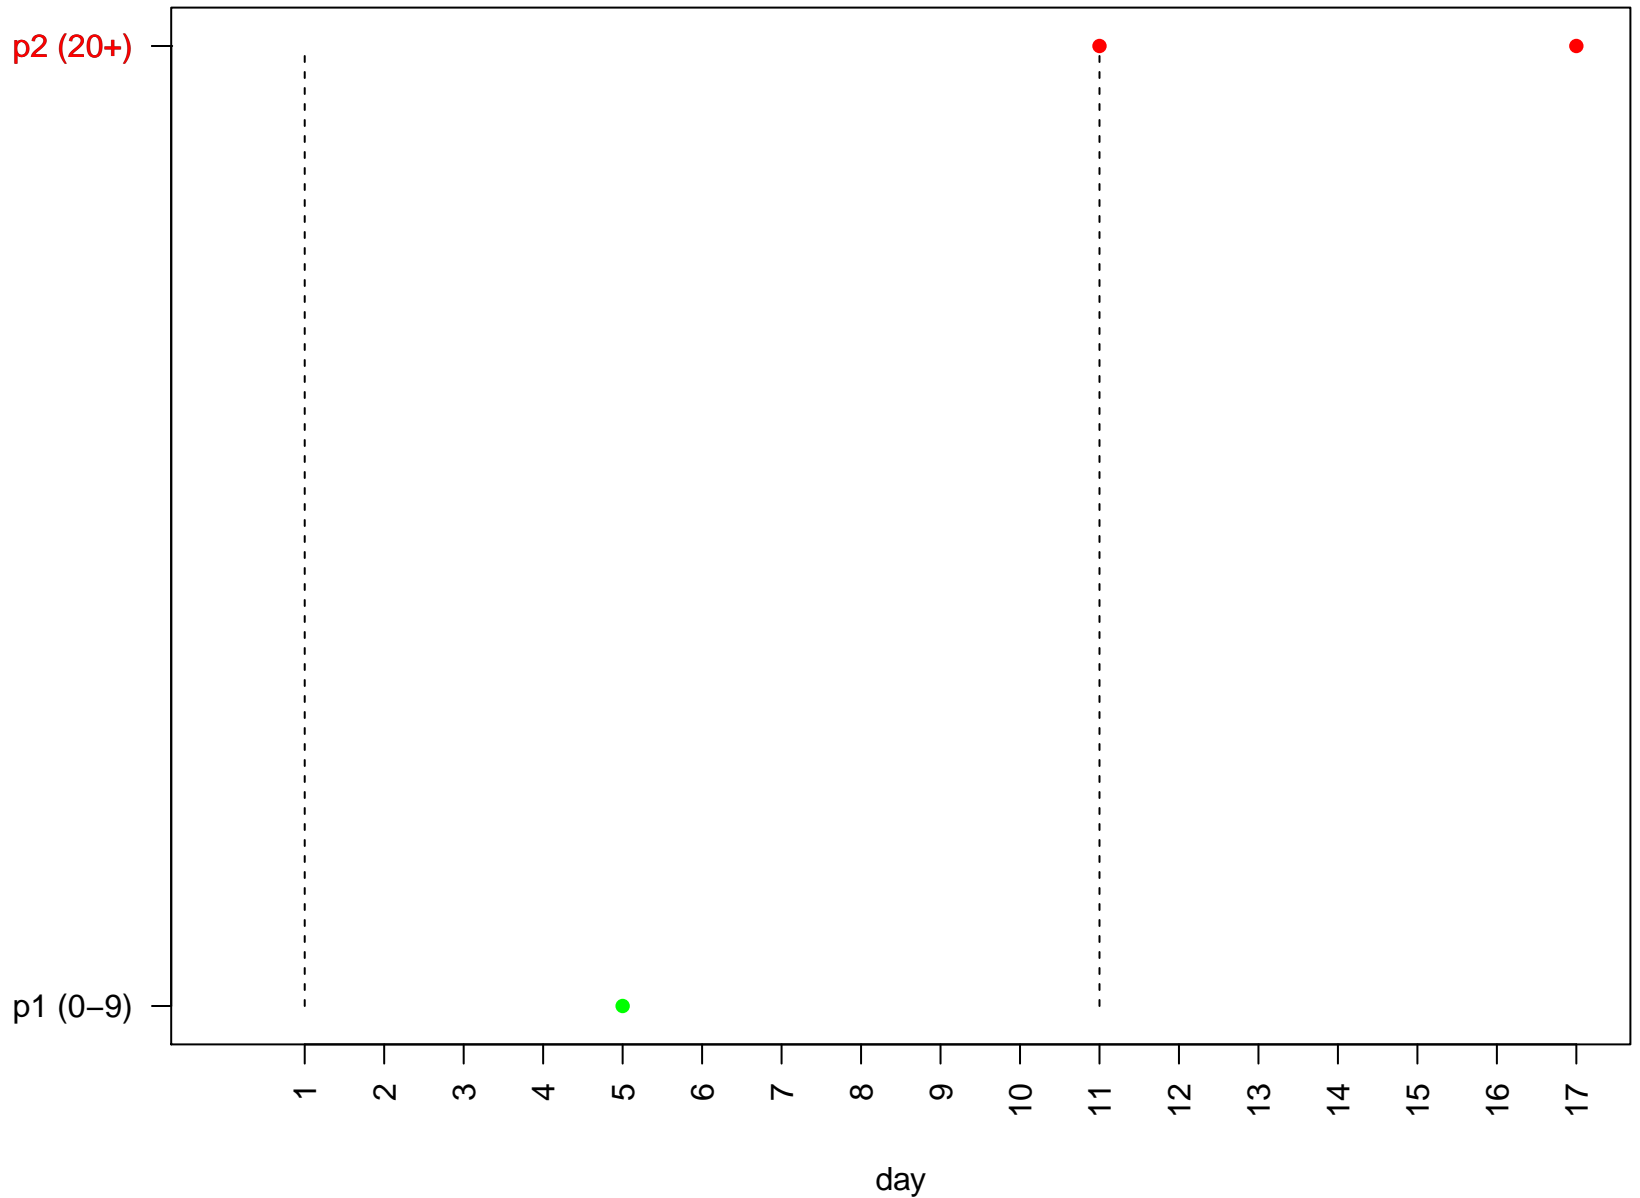

# Household 194

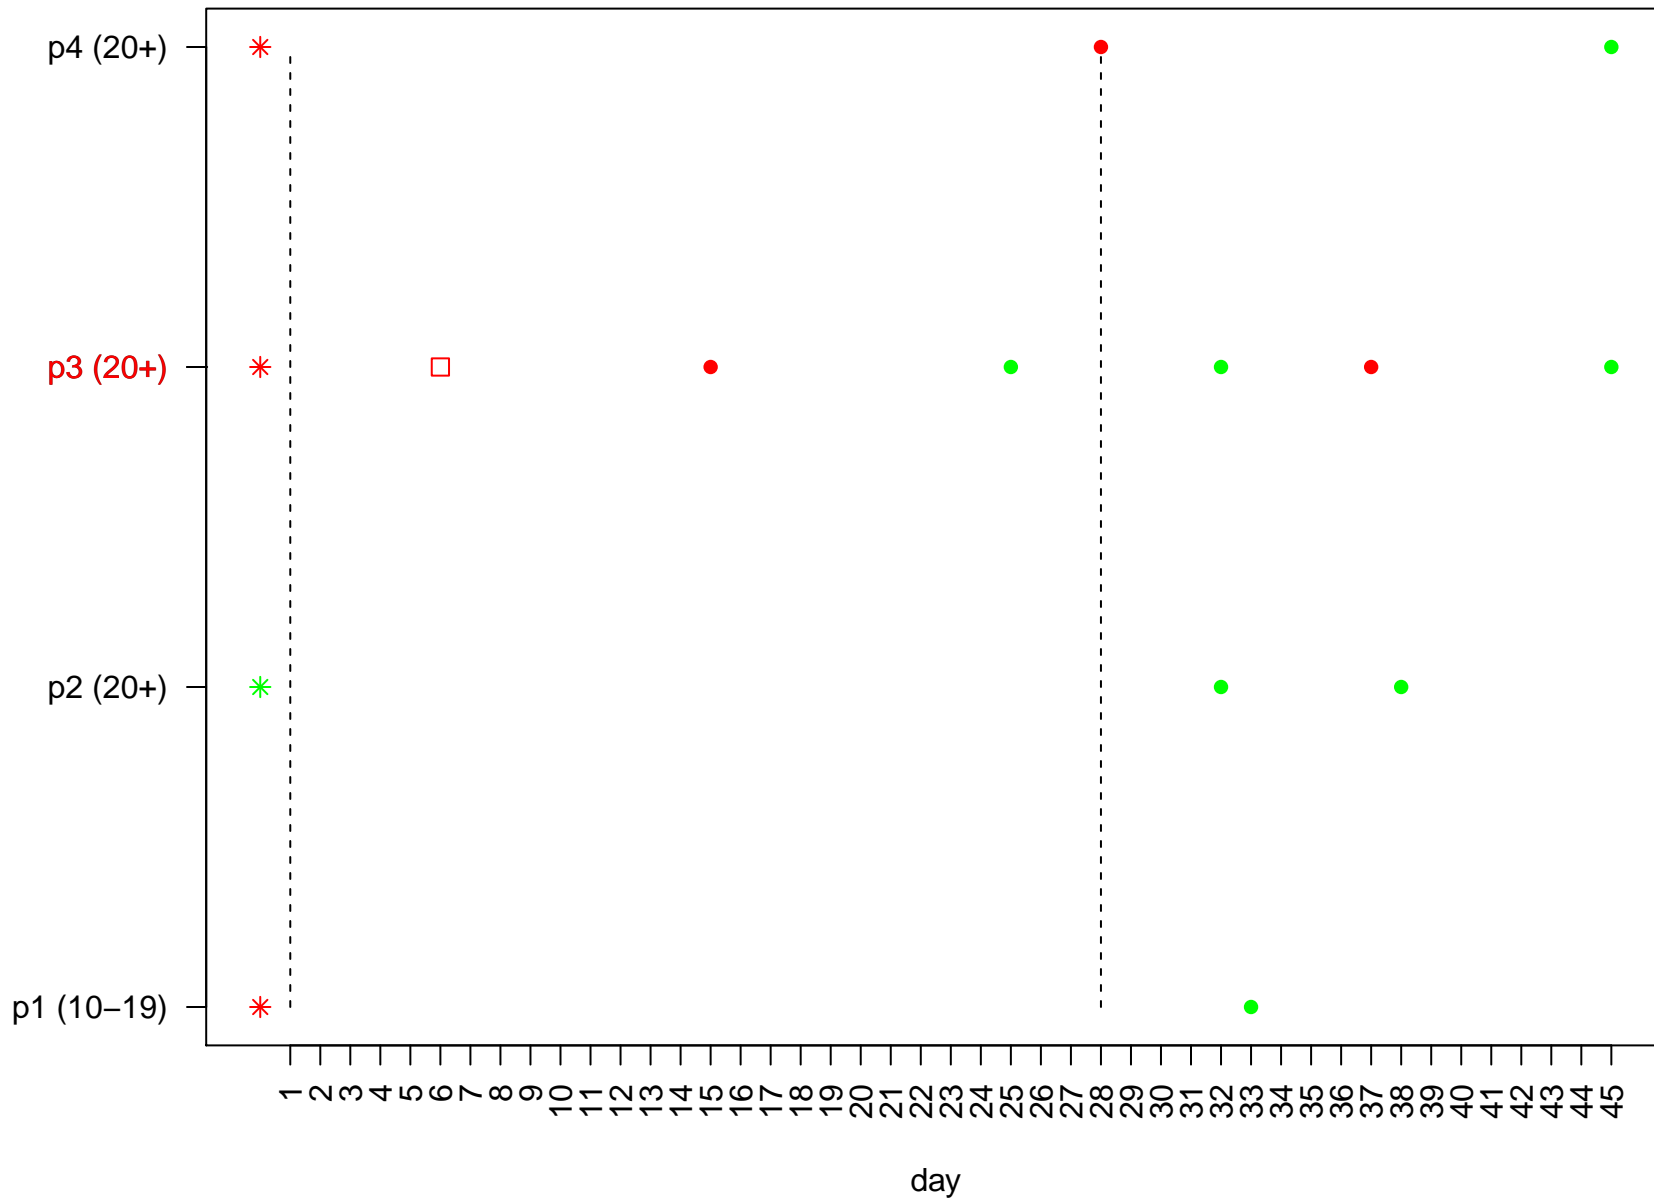



# Household 195

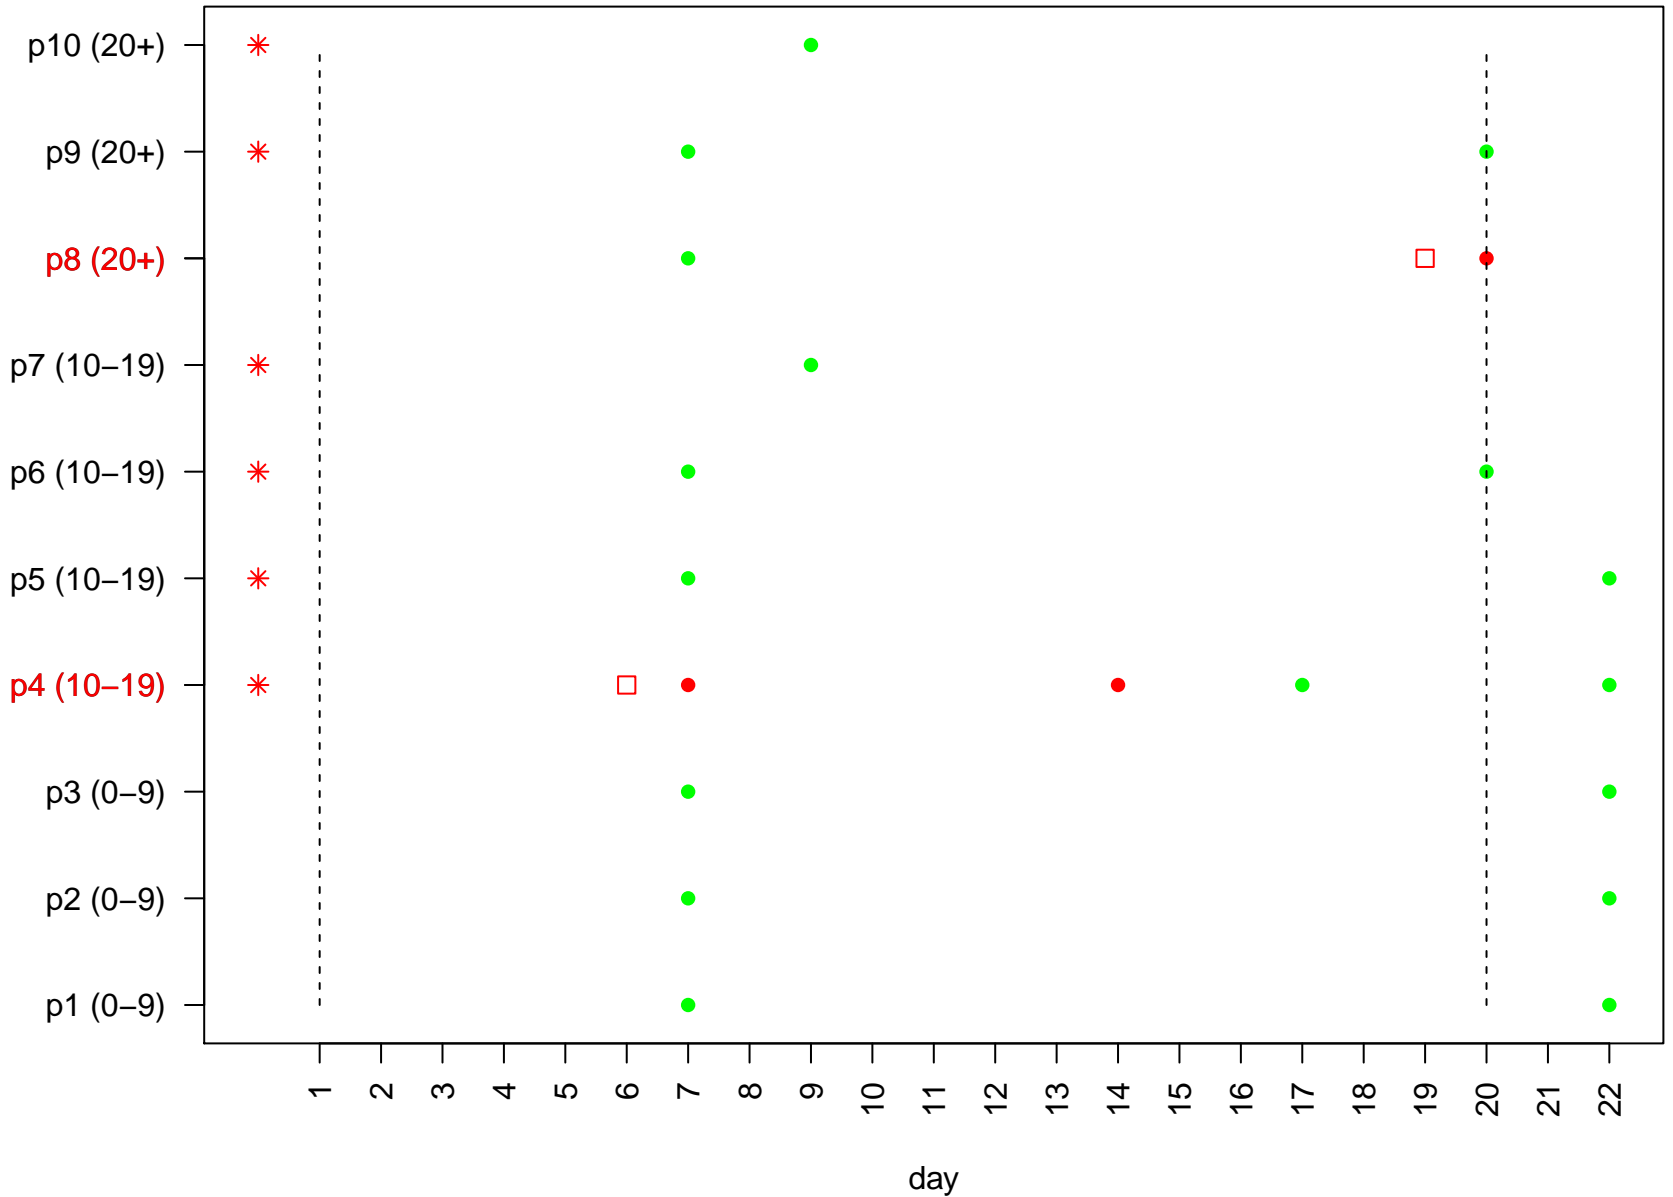

# Household 196

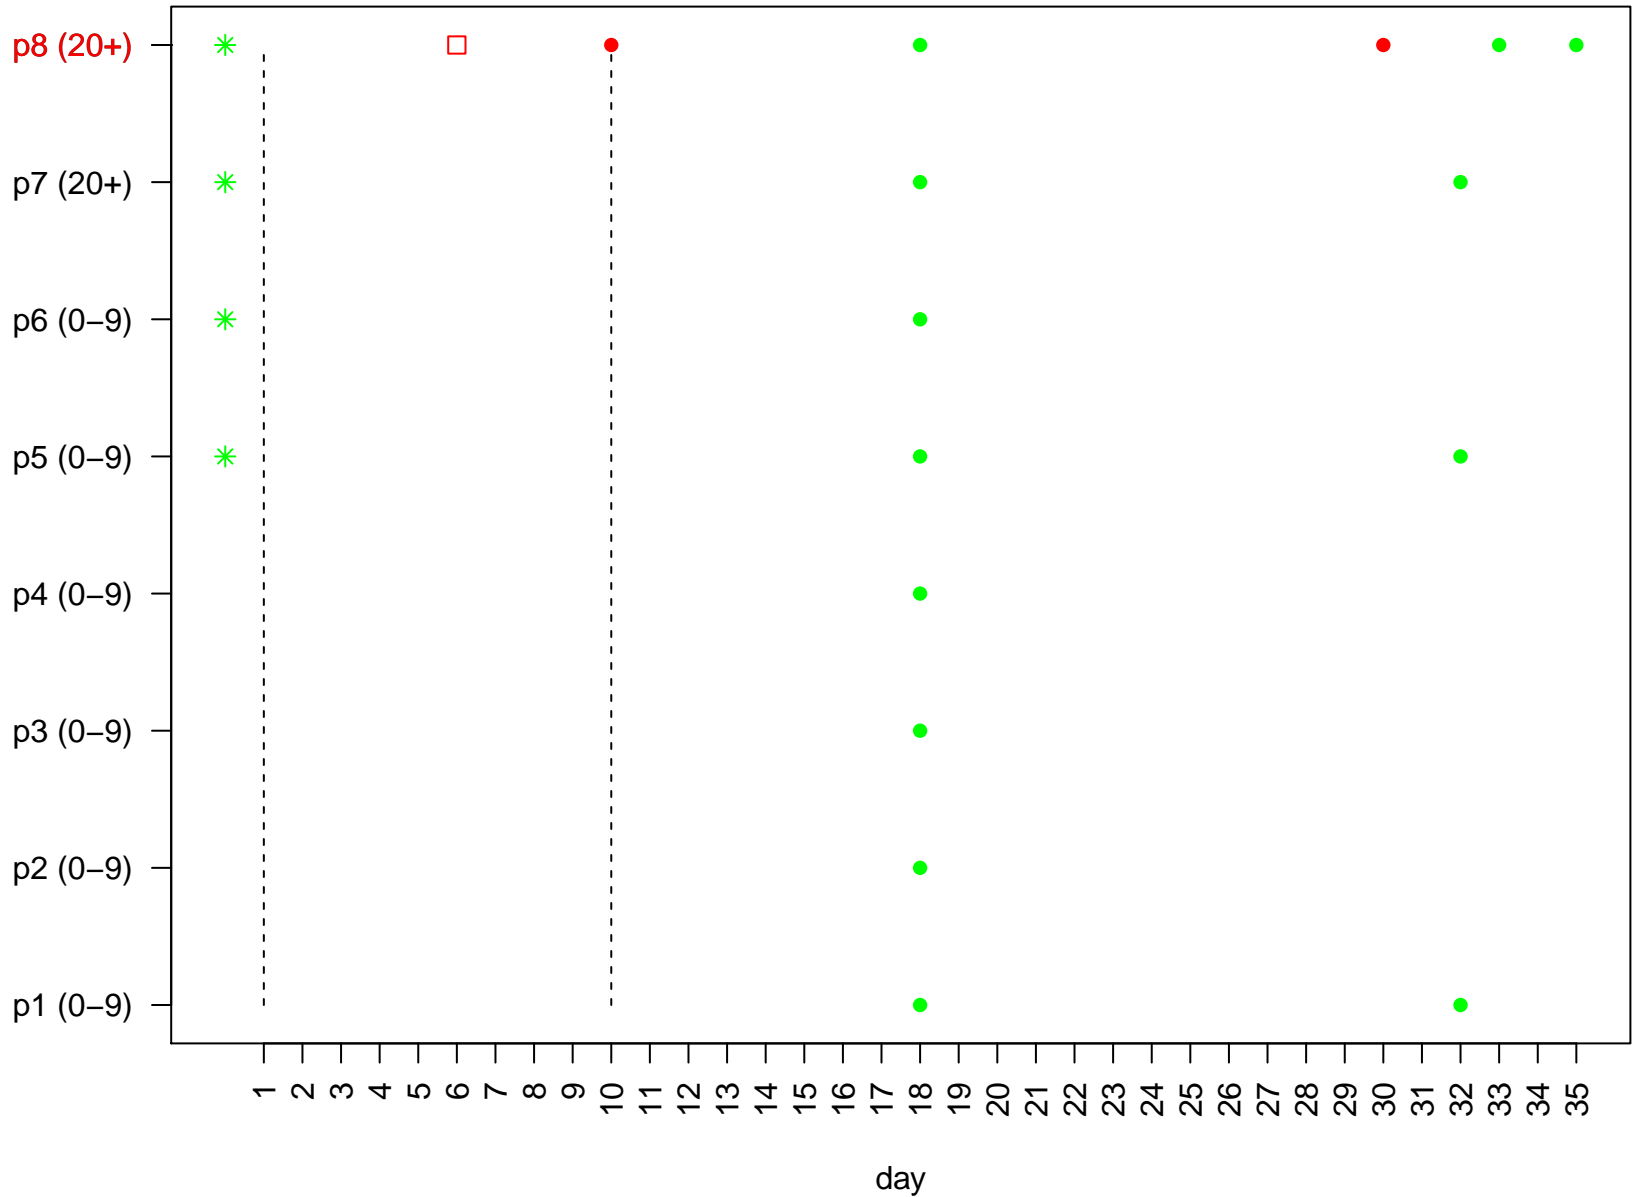

# Household 197

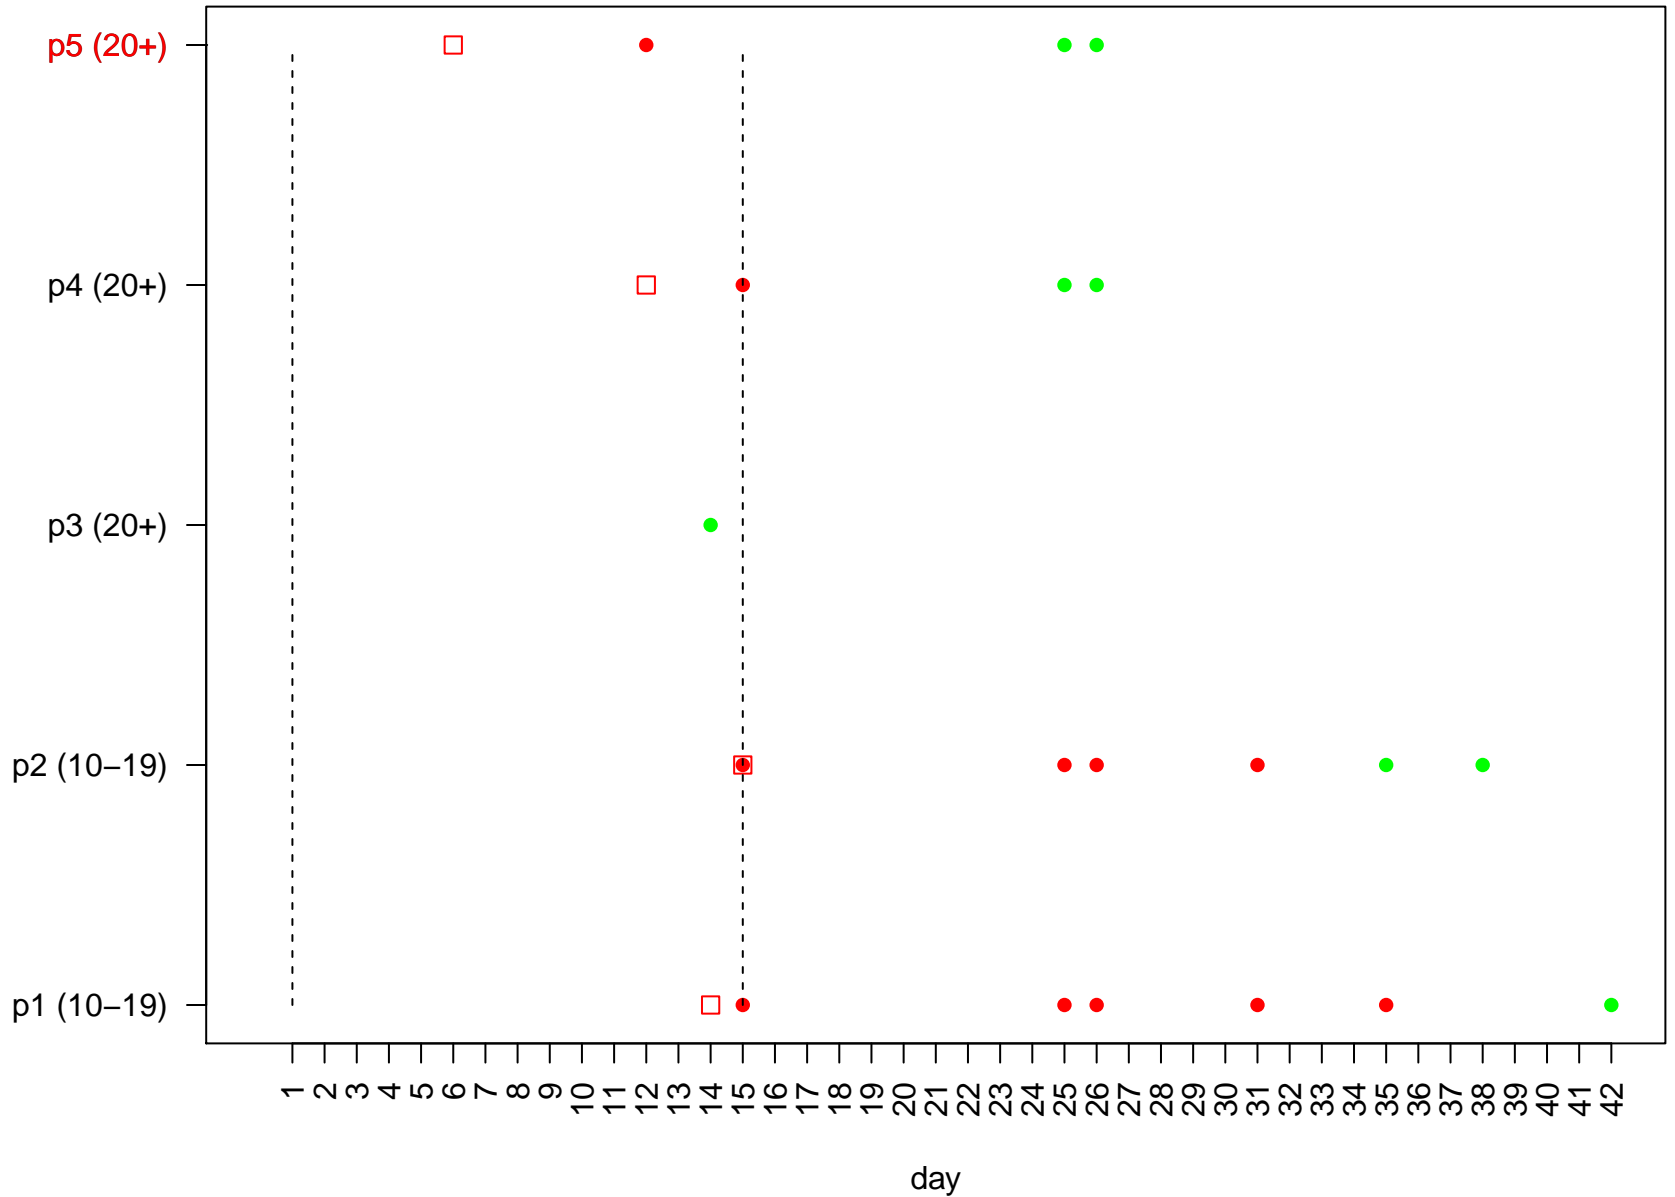

# Household 198

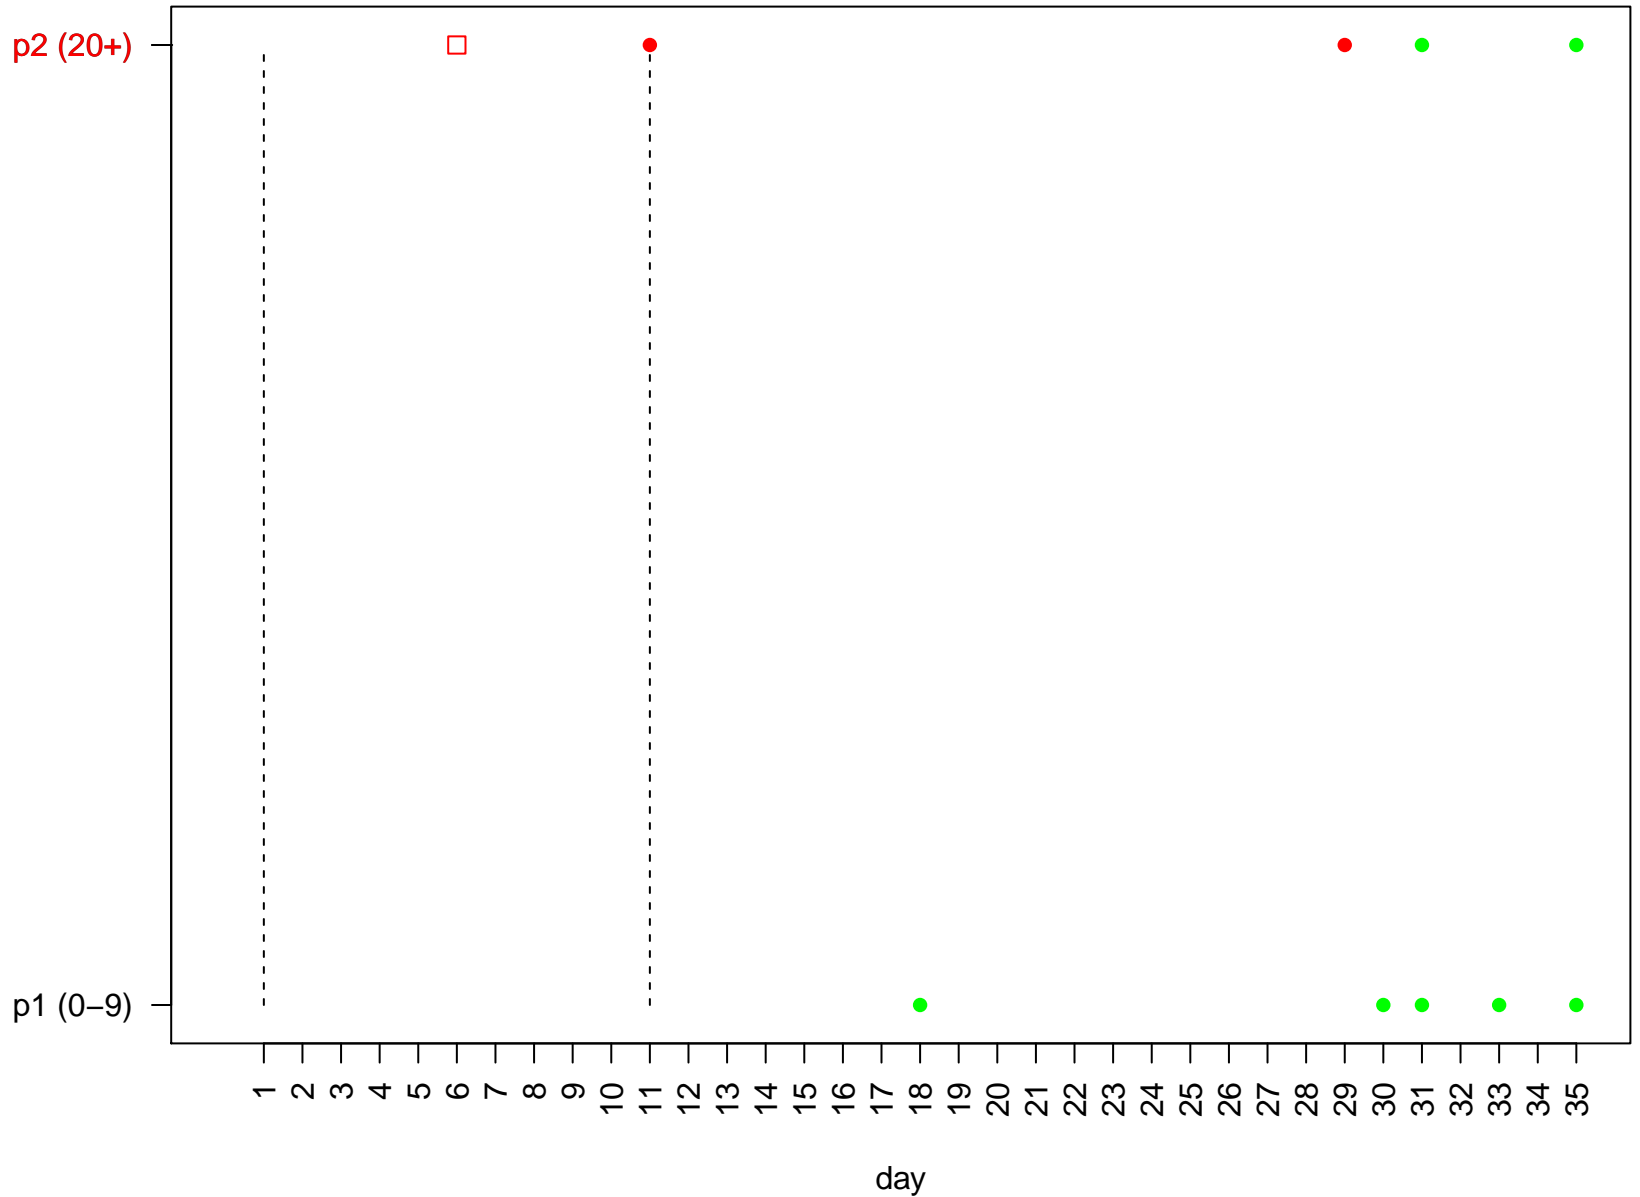

# Household 199

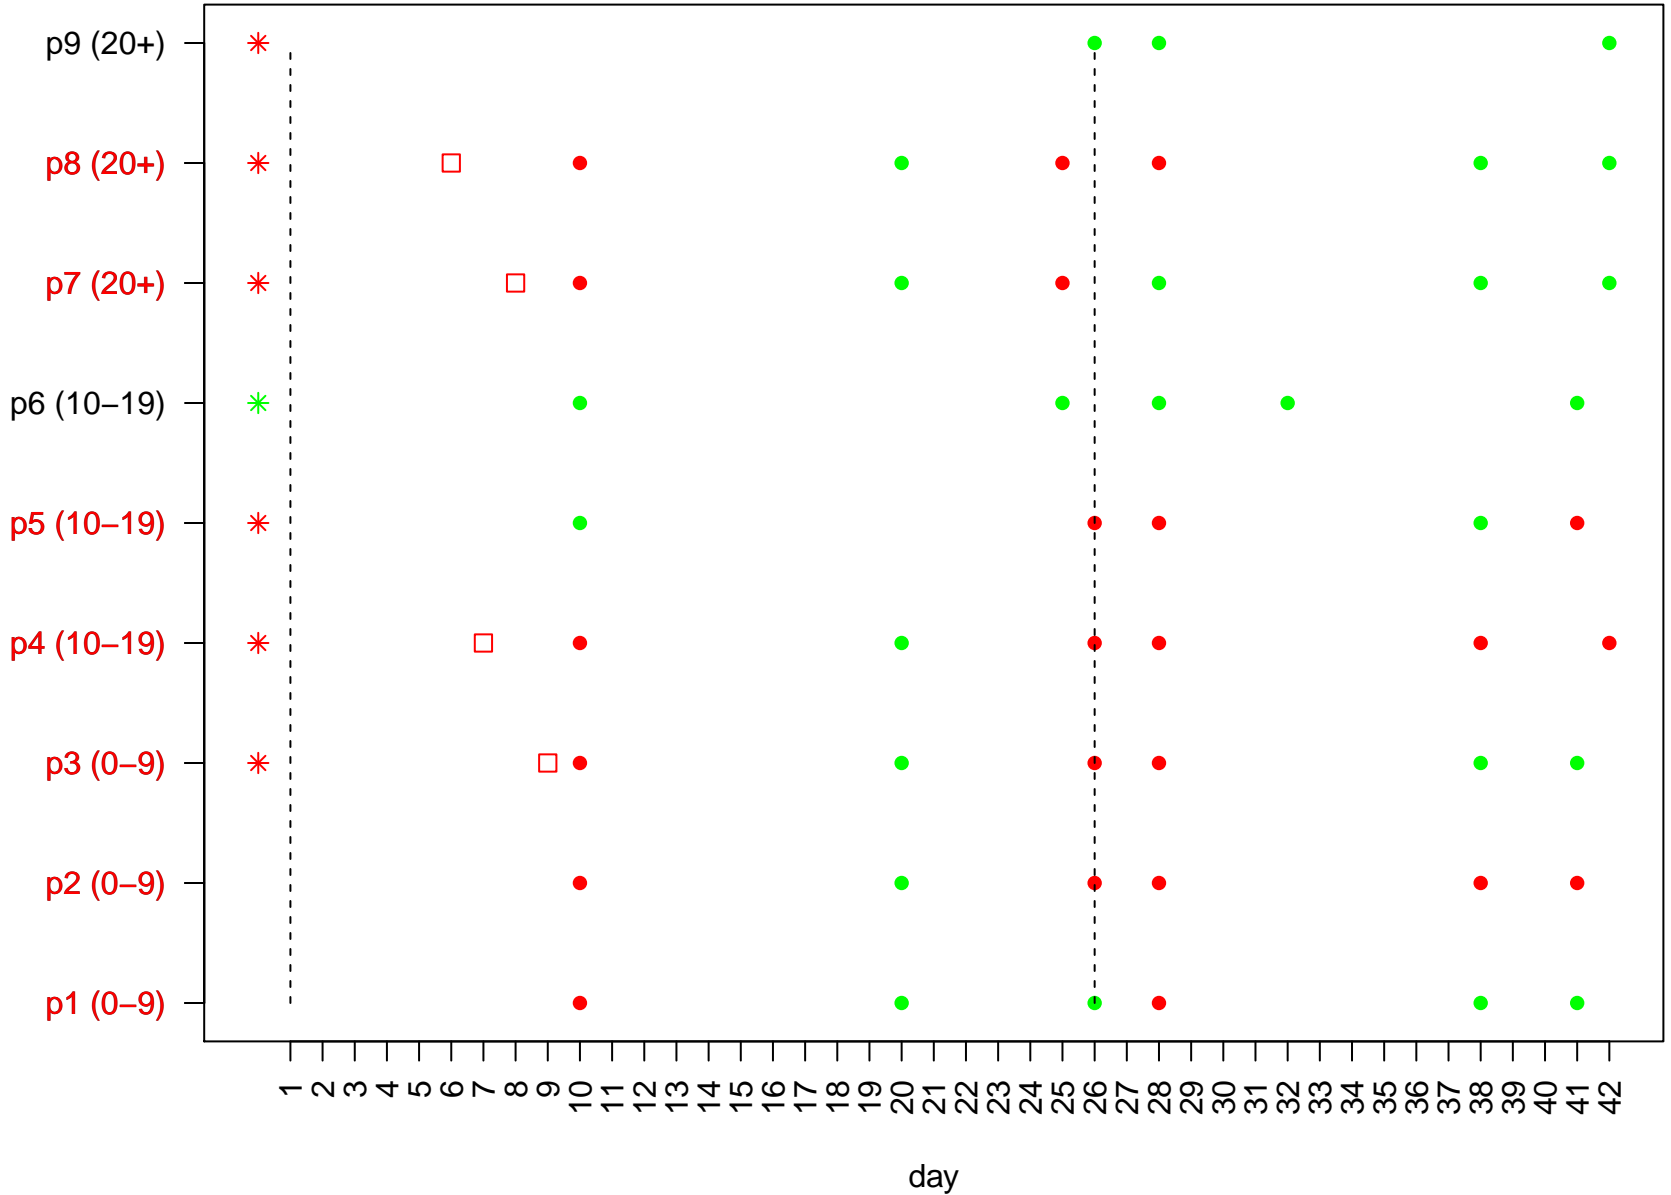

# Household 200

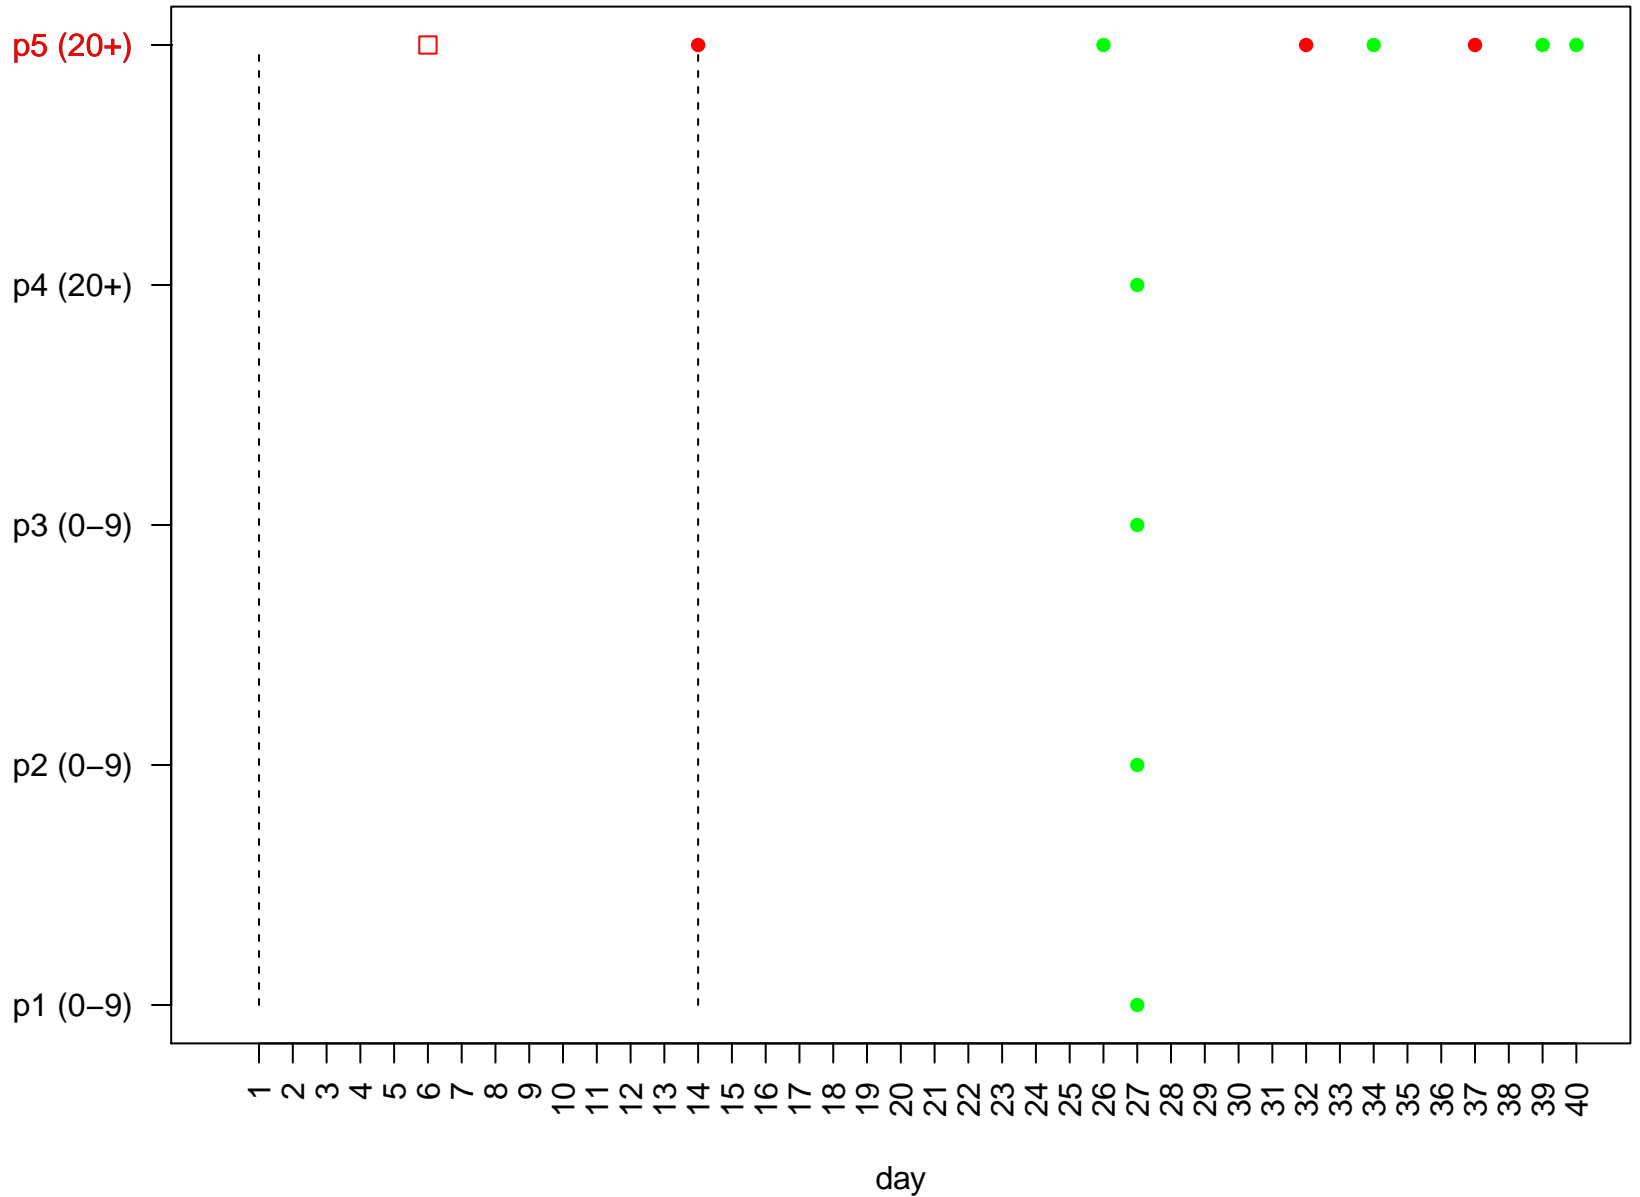



# Household 202

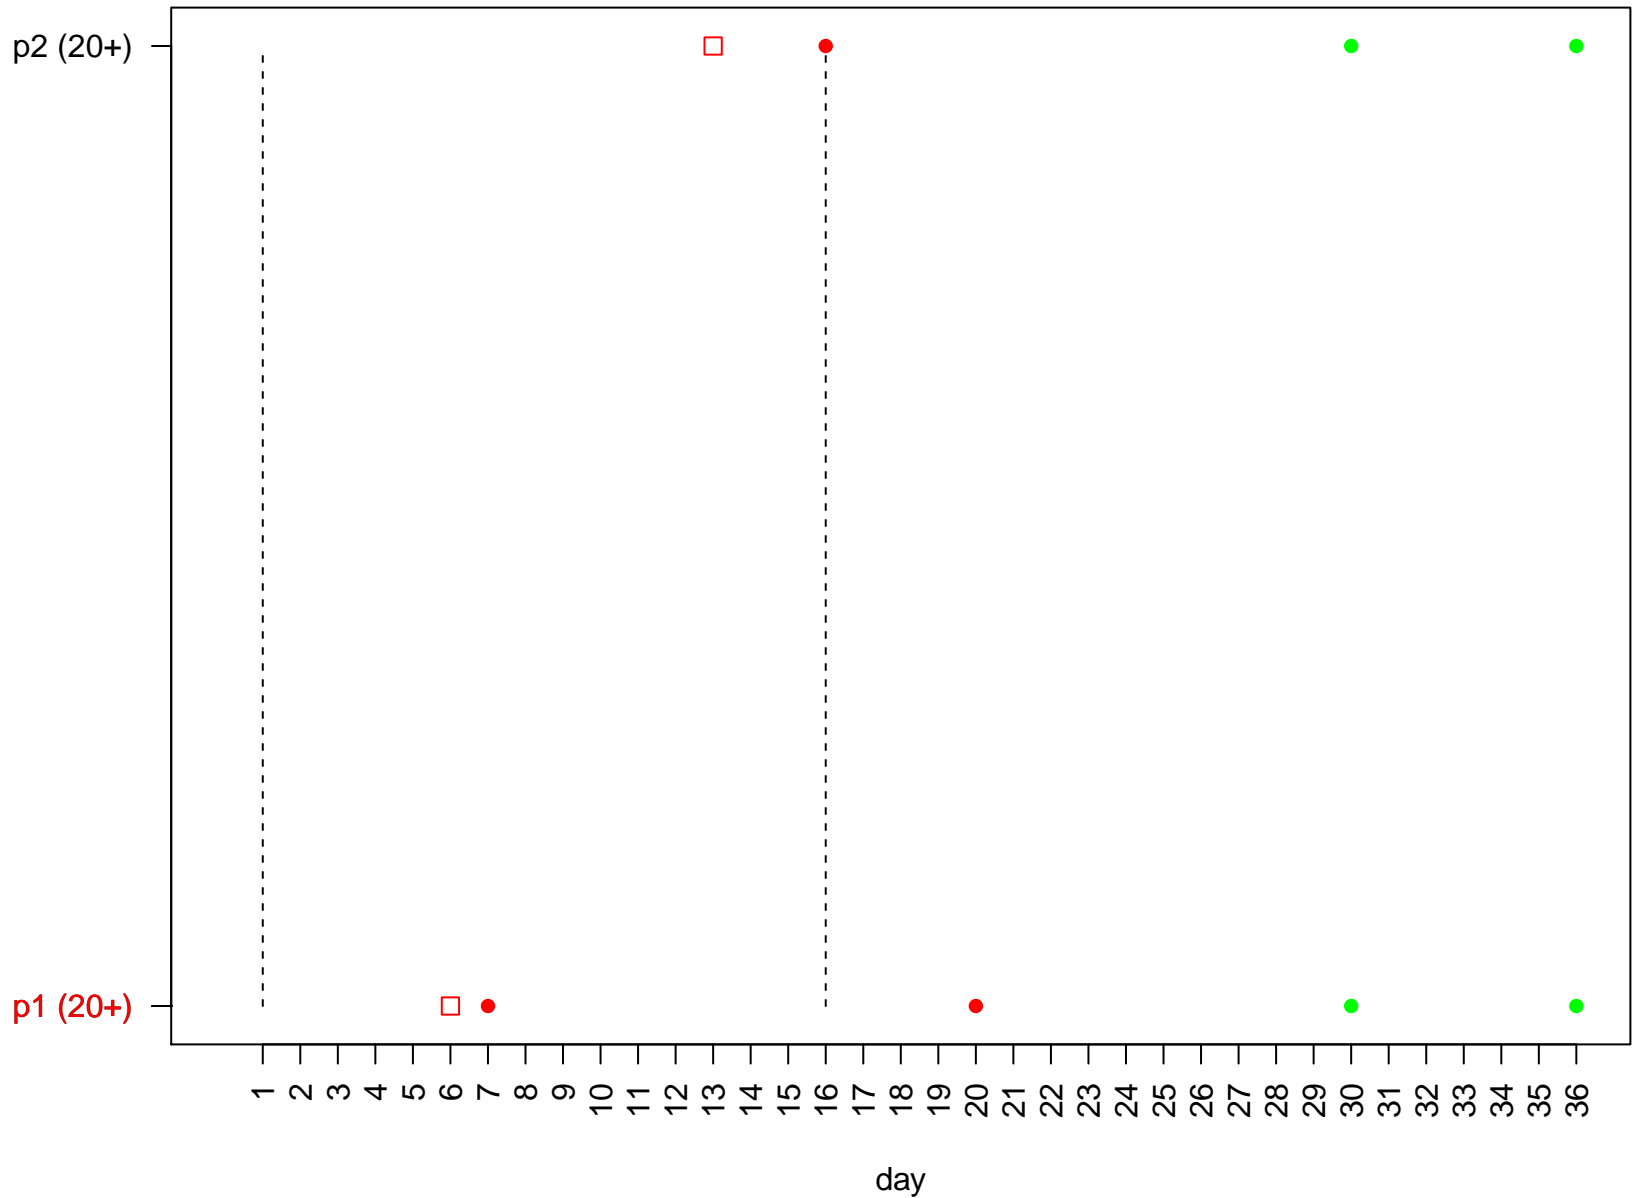



# Household 203

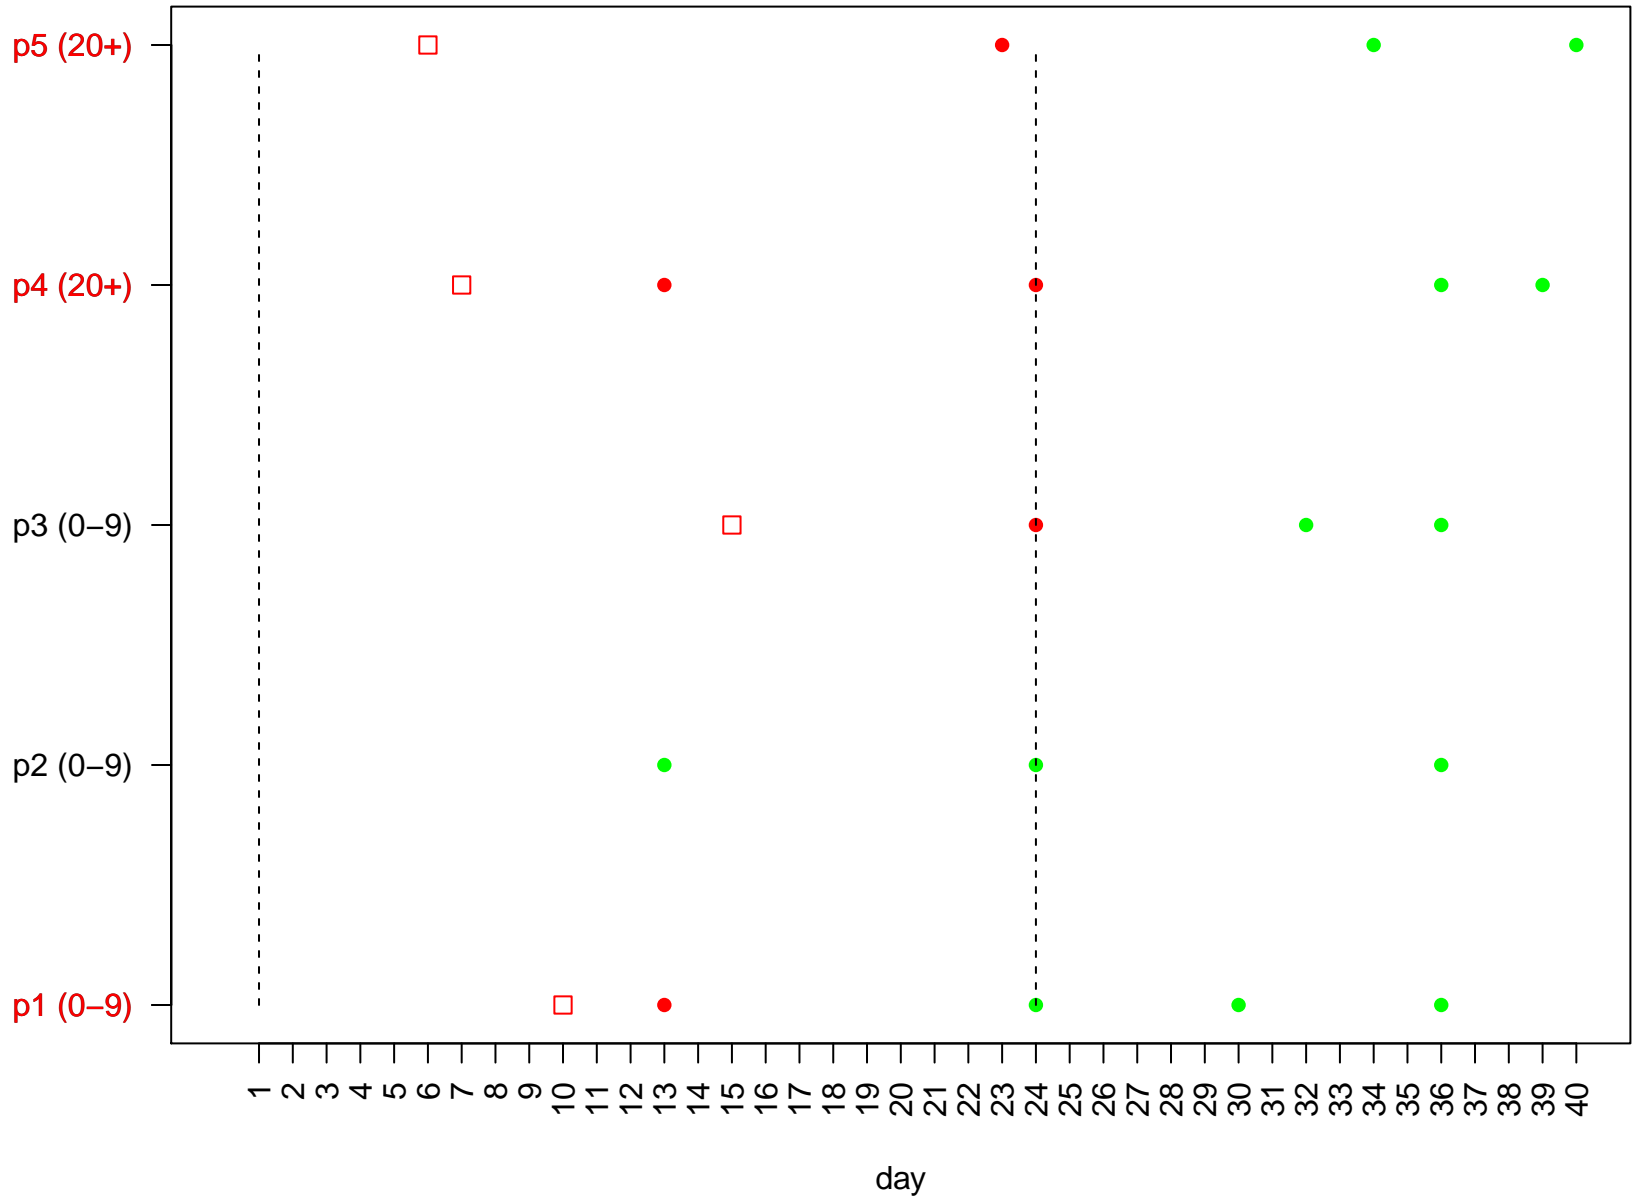

# Household 204

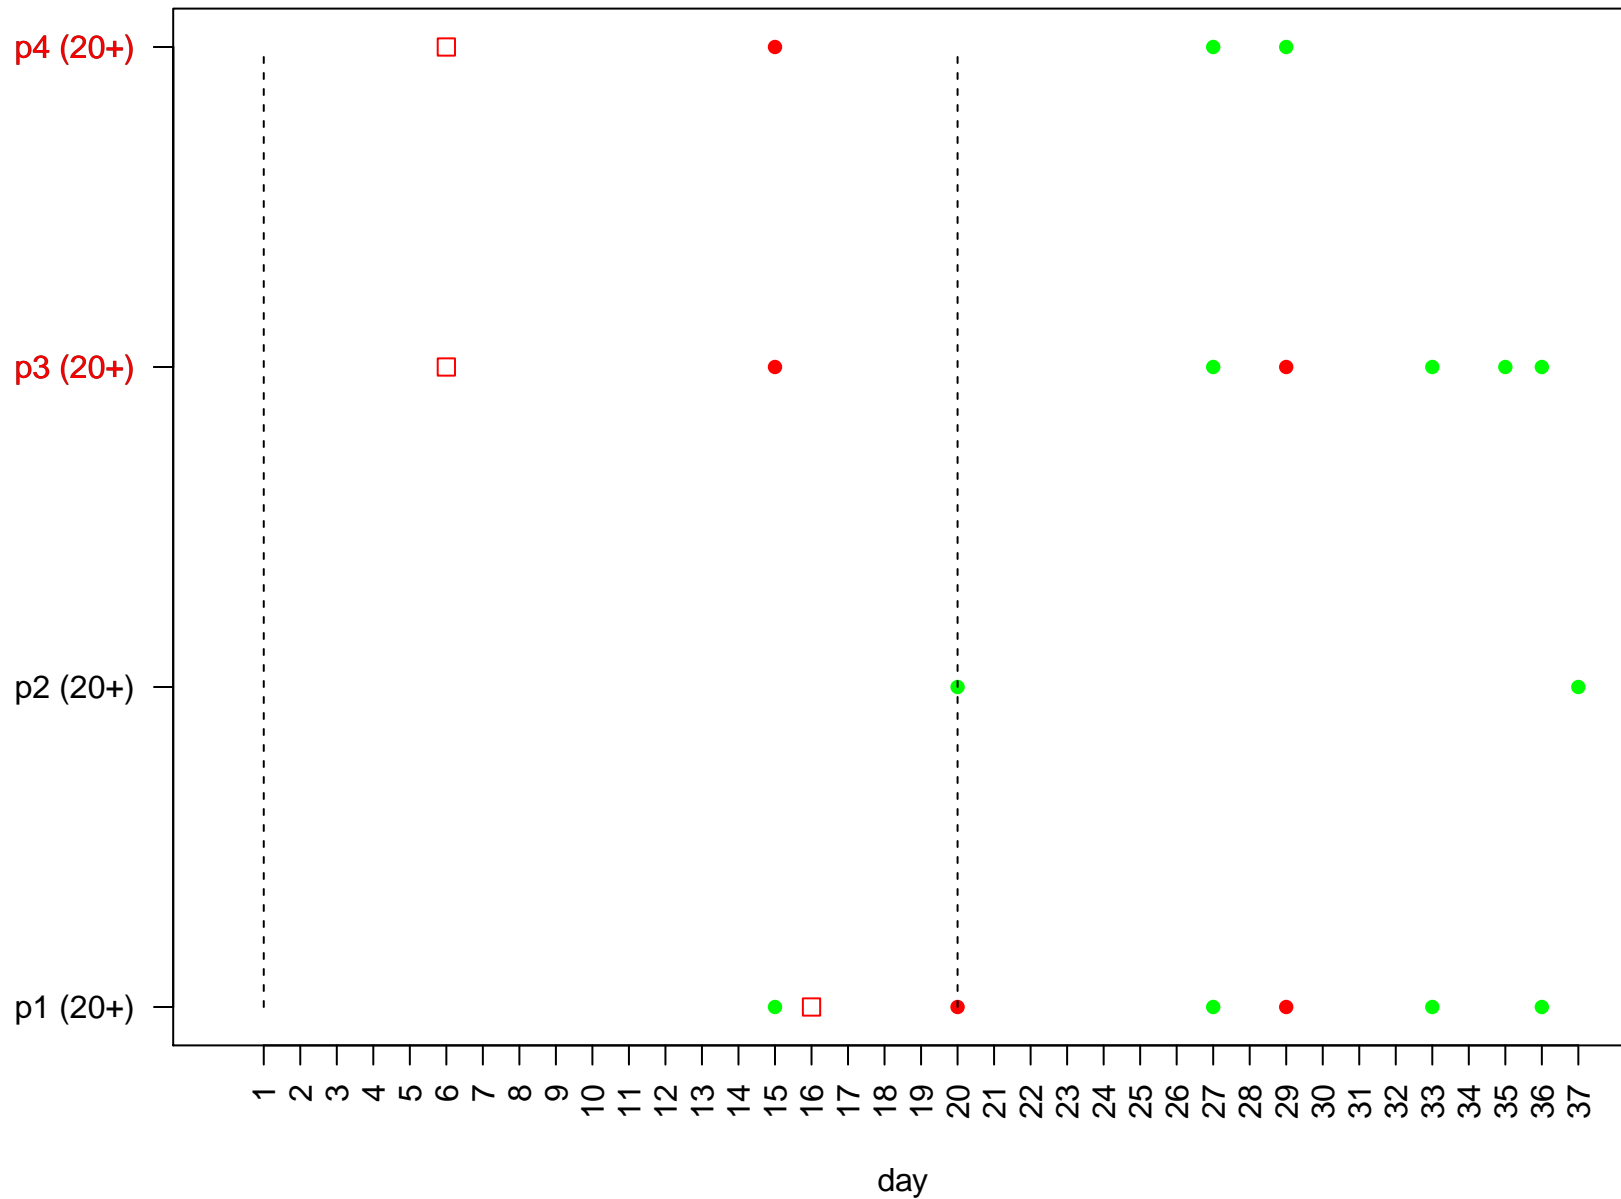

# Household 205

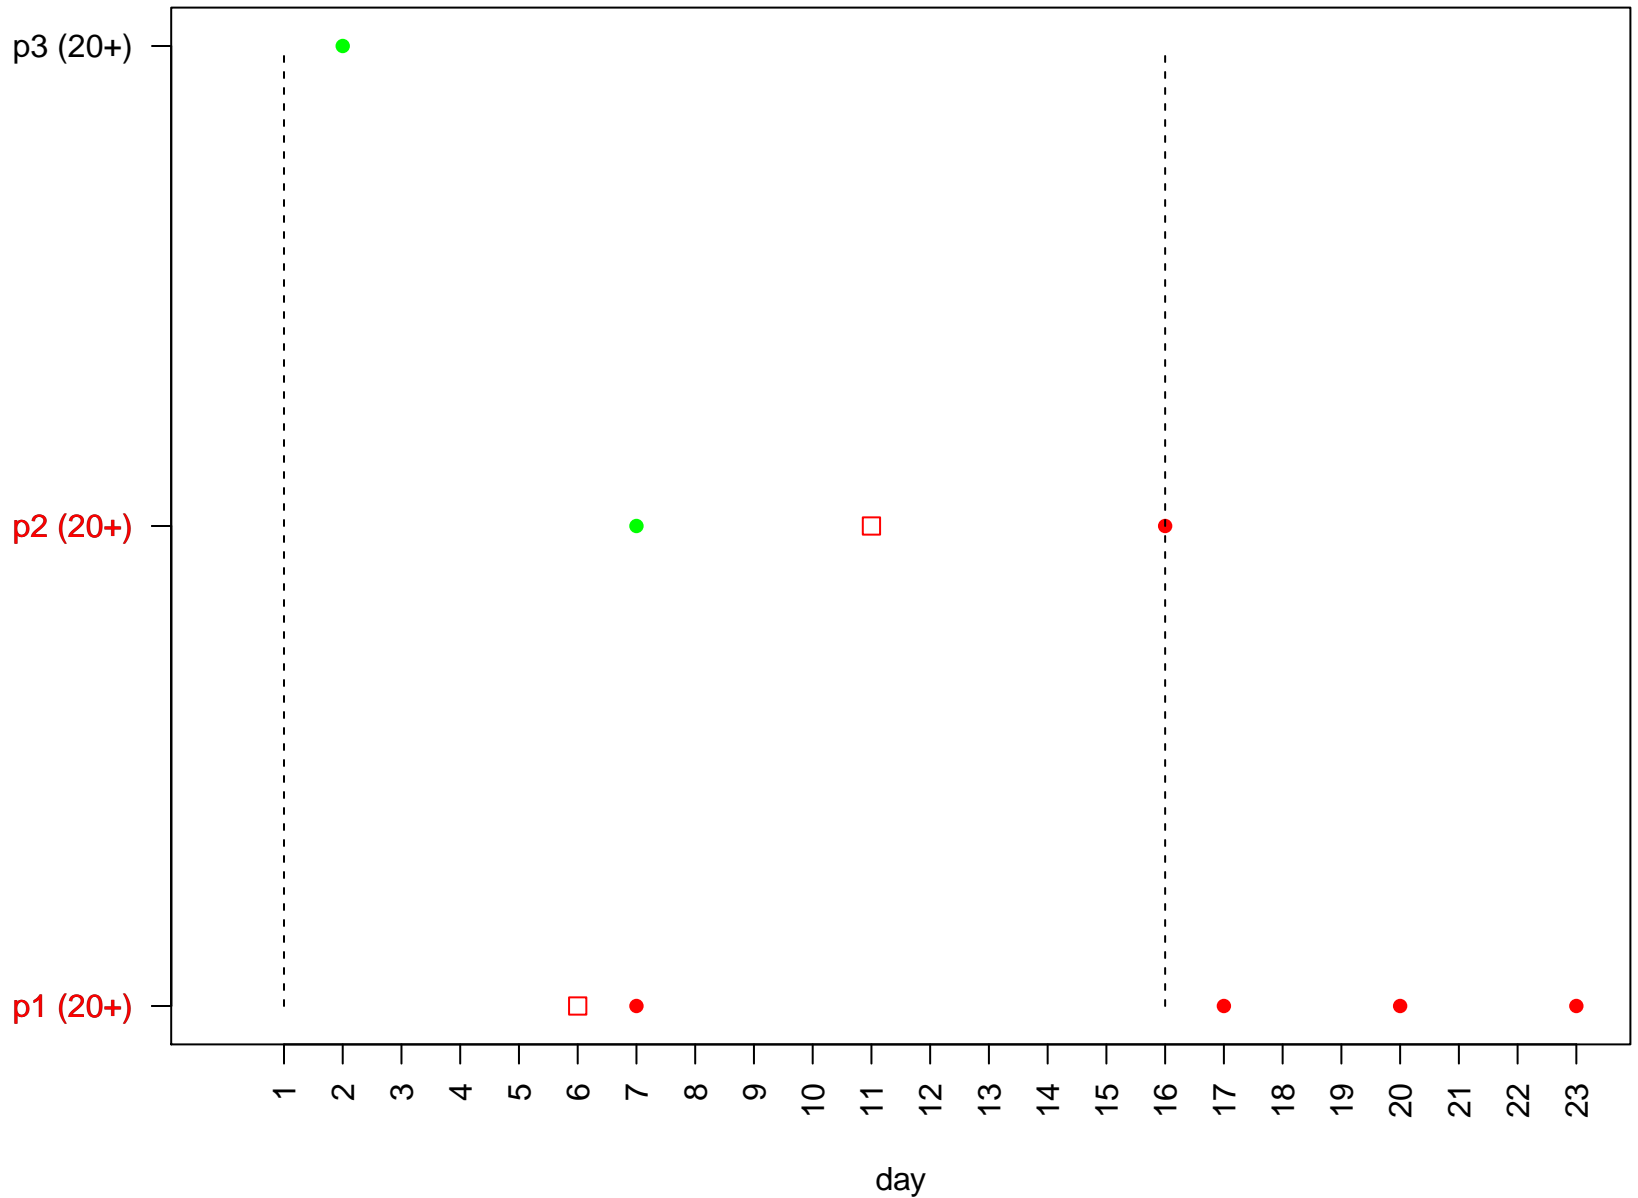

# Household 206

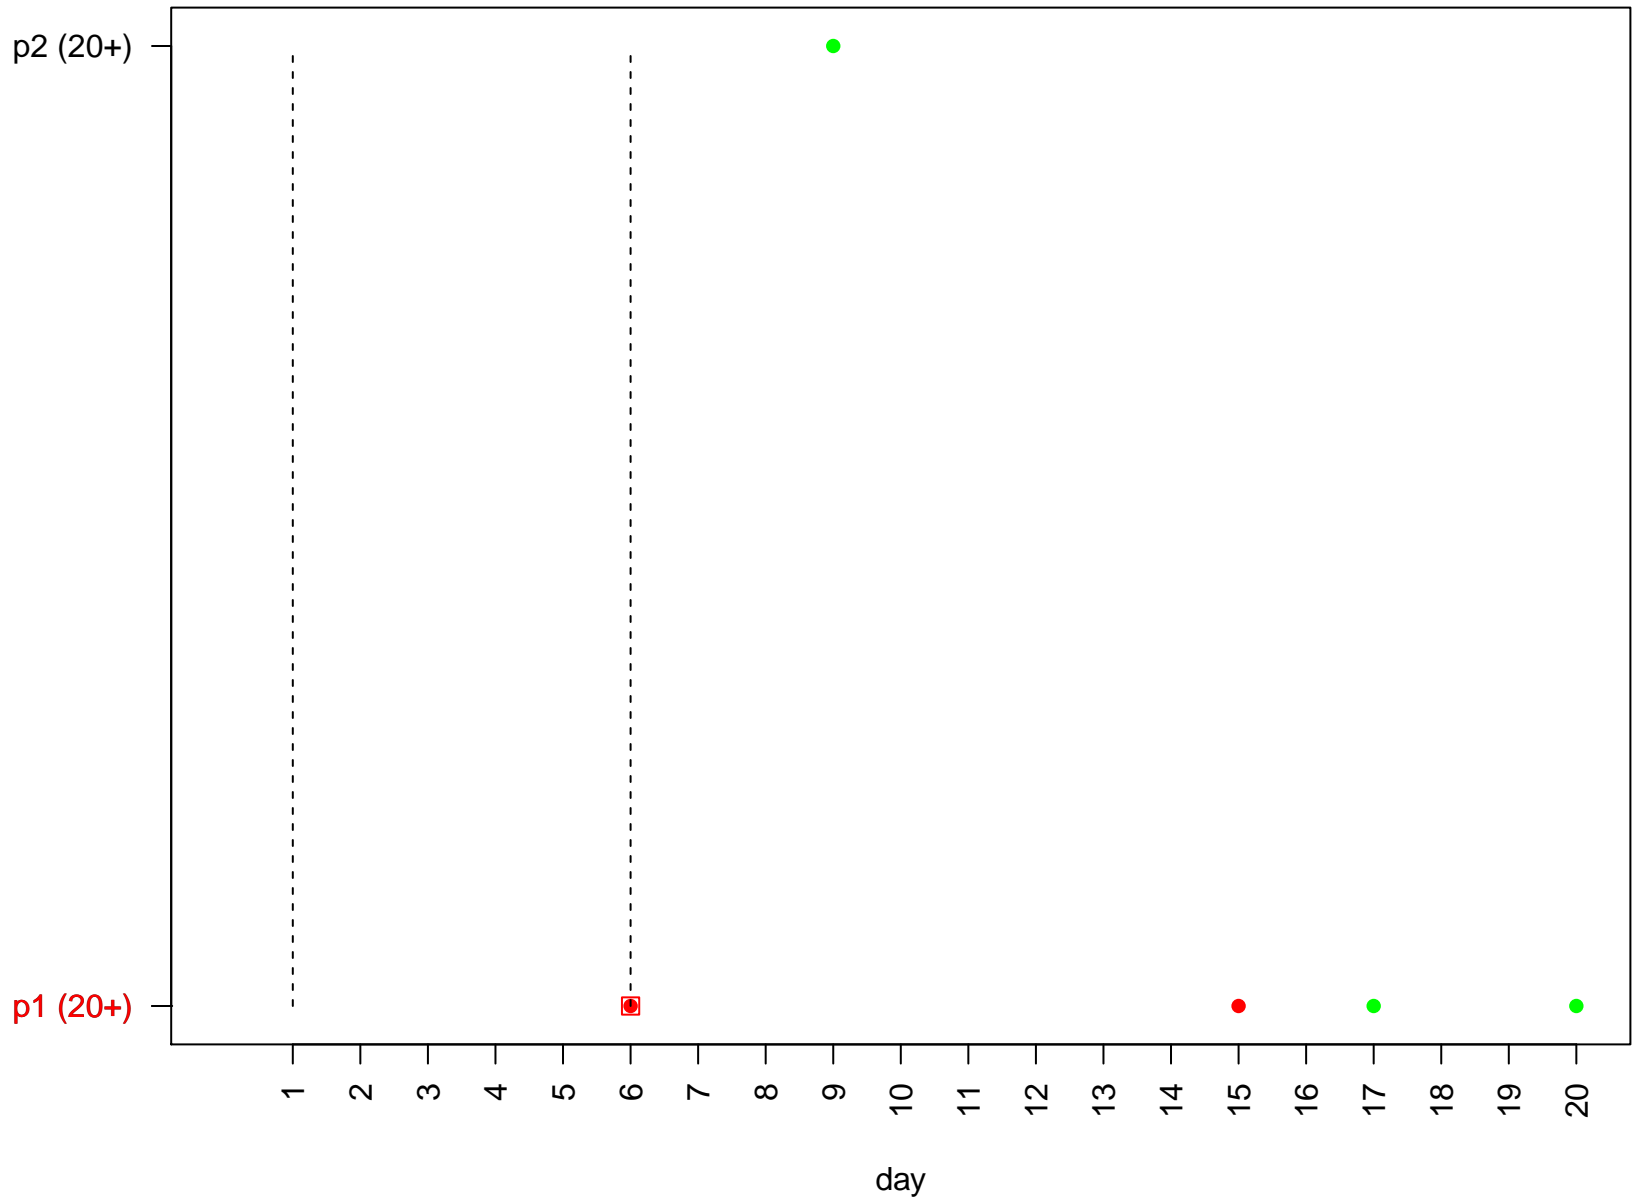

# Household 207

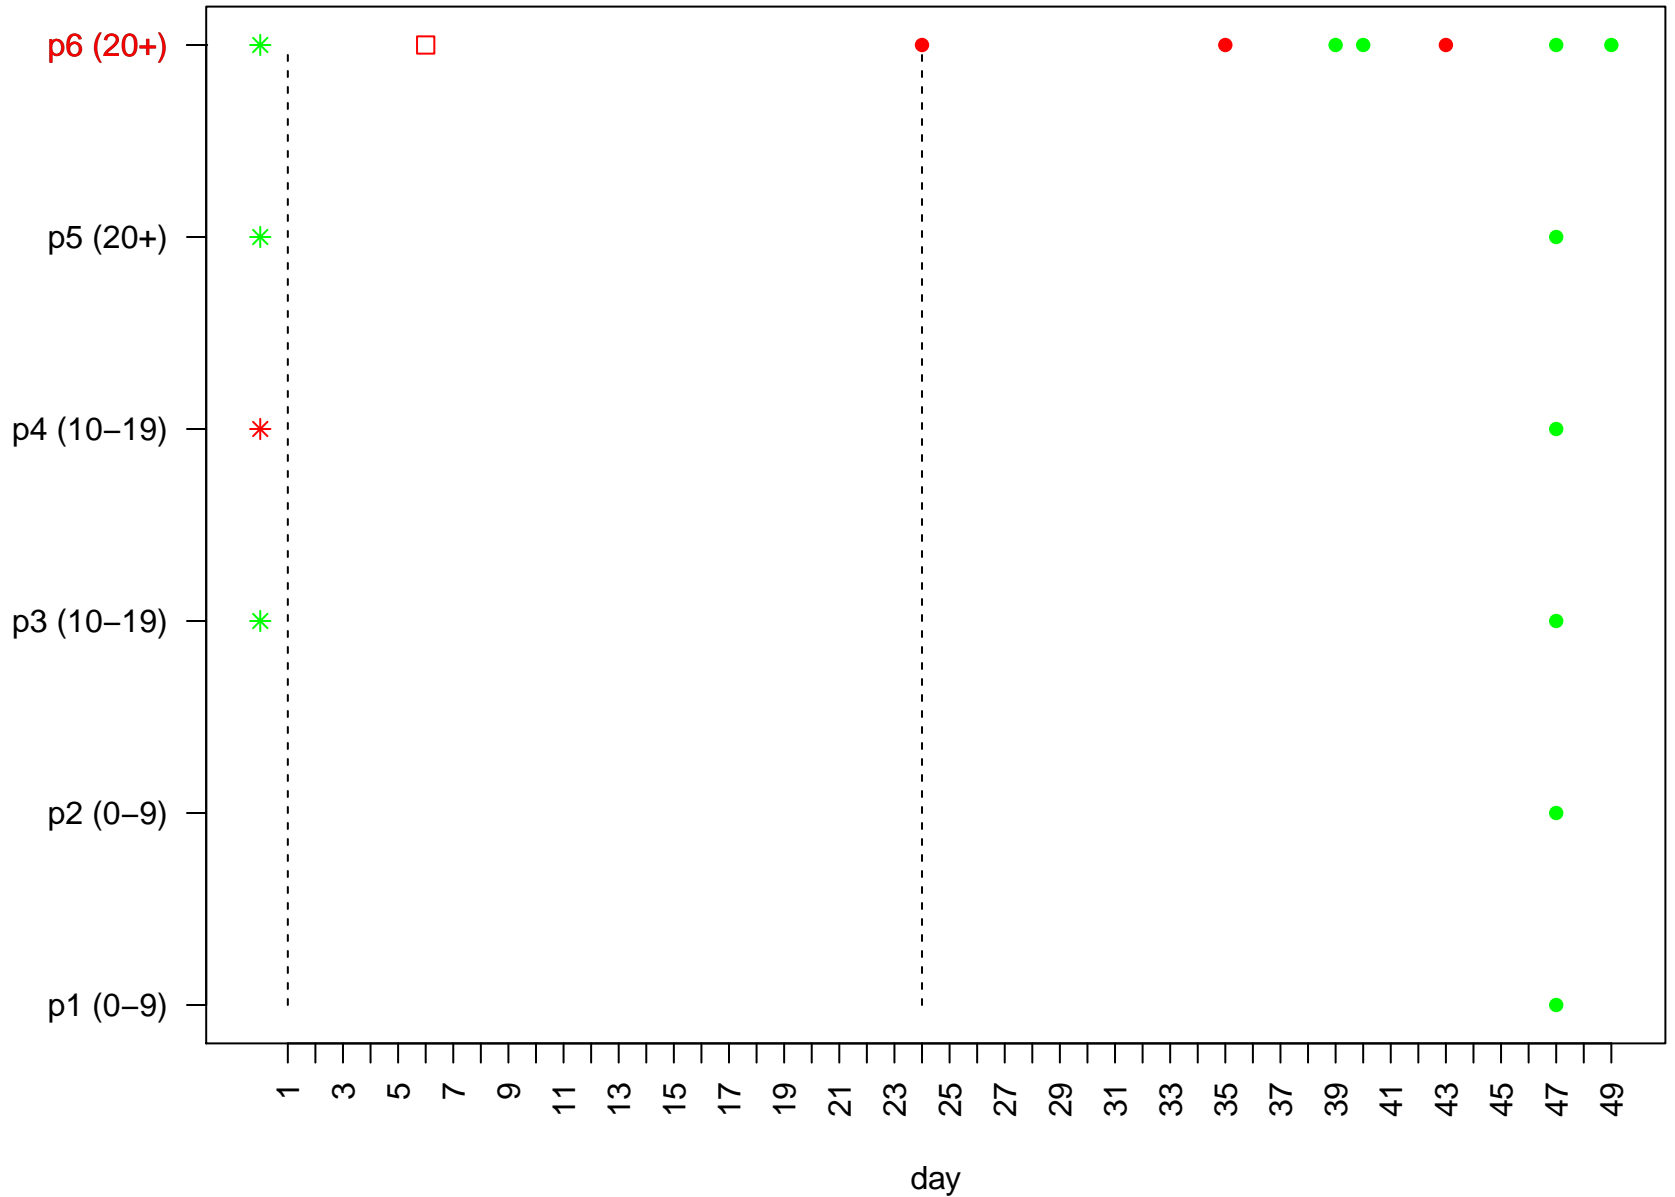

# Household 208

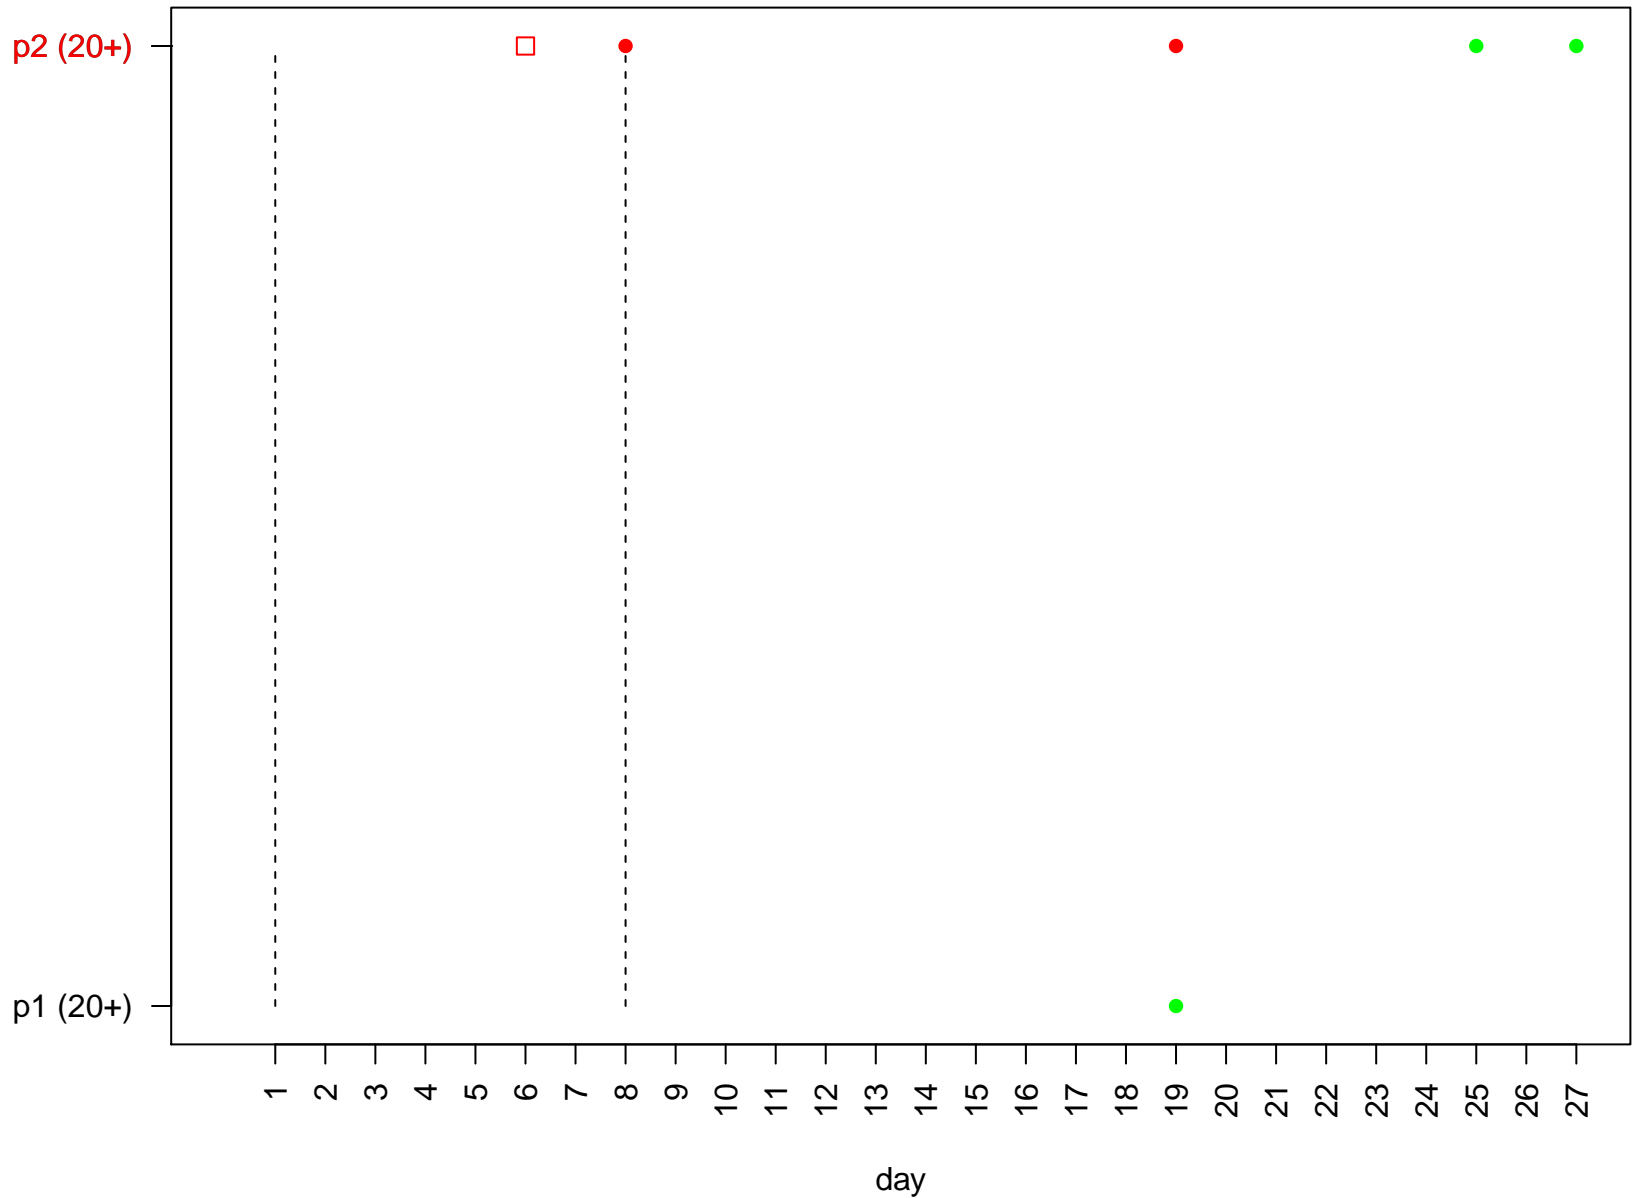

# Household 209

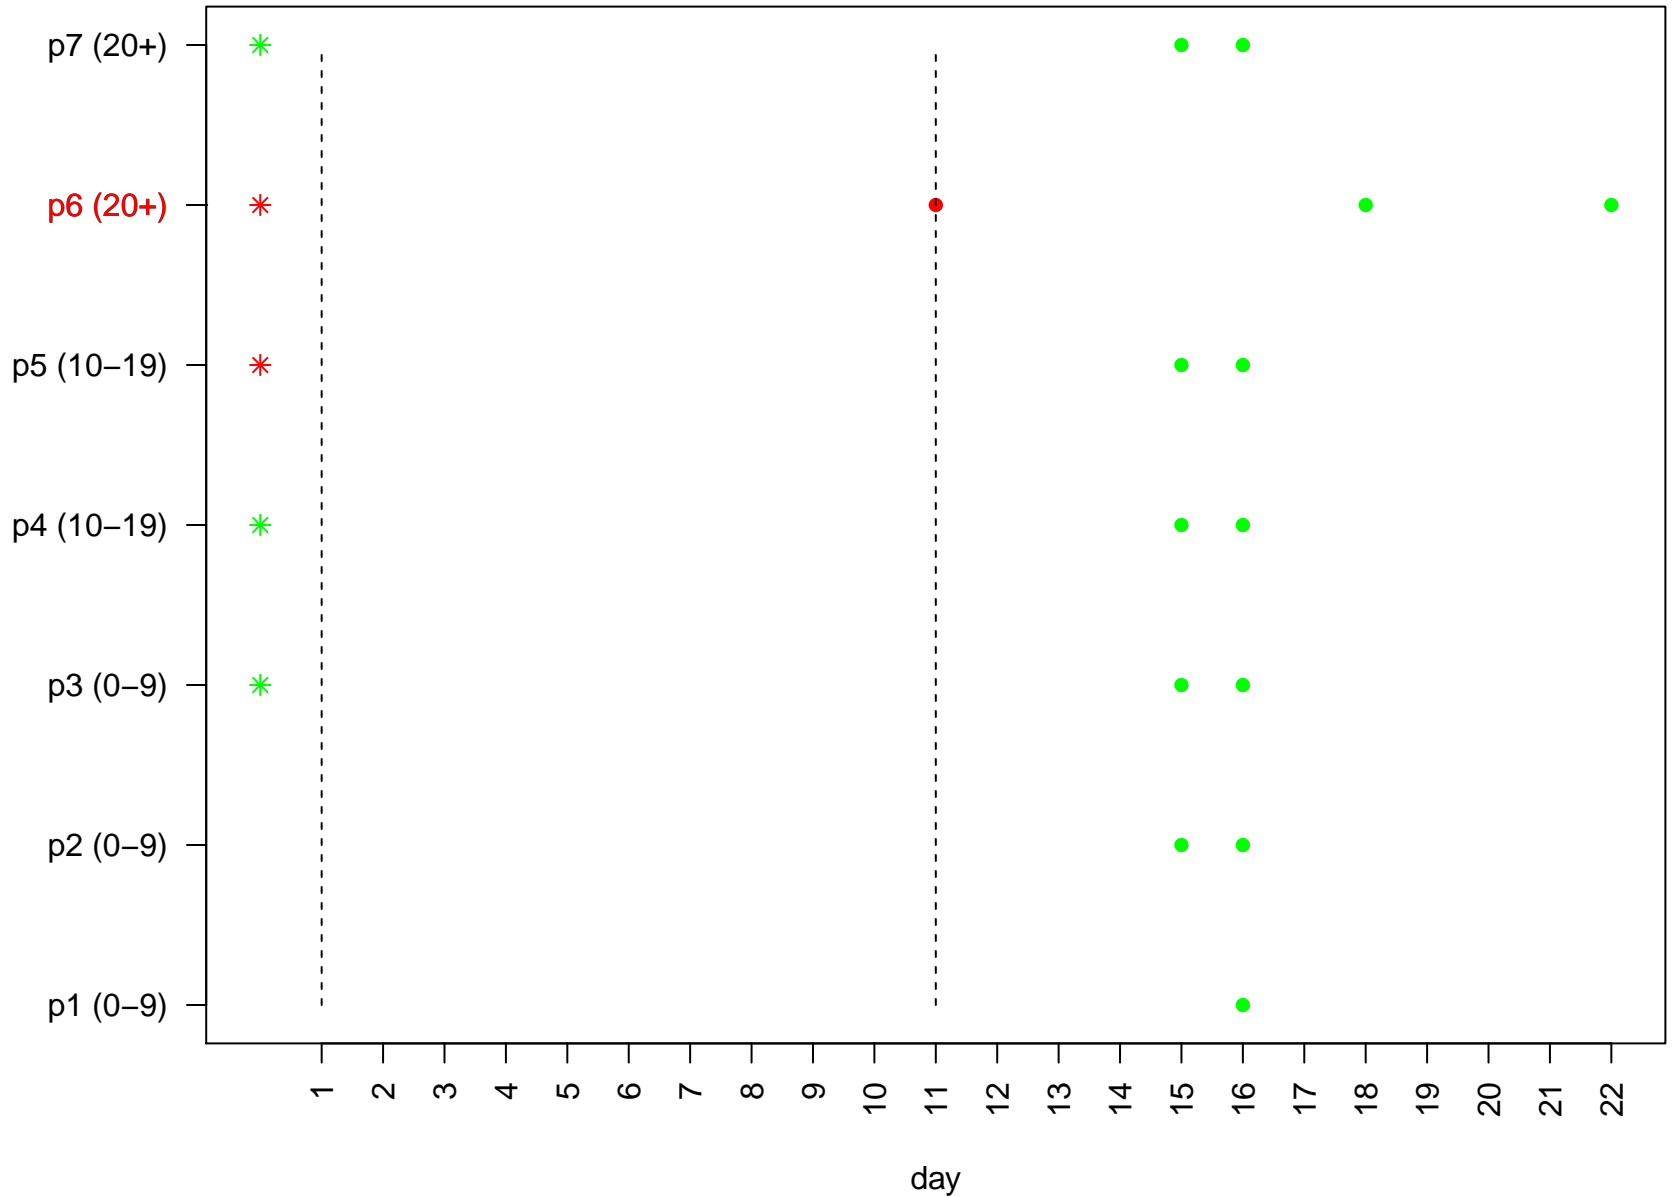

# Household 210

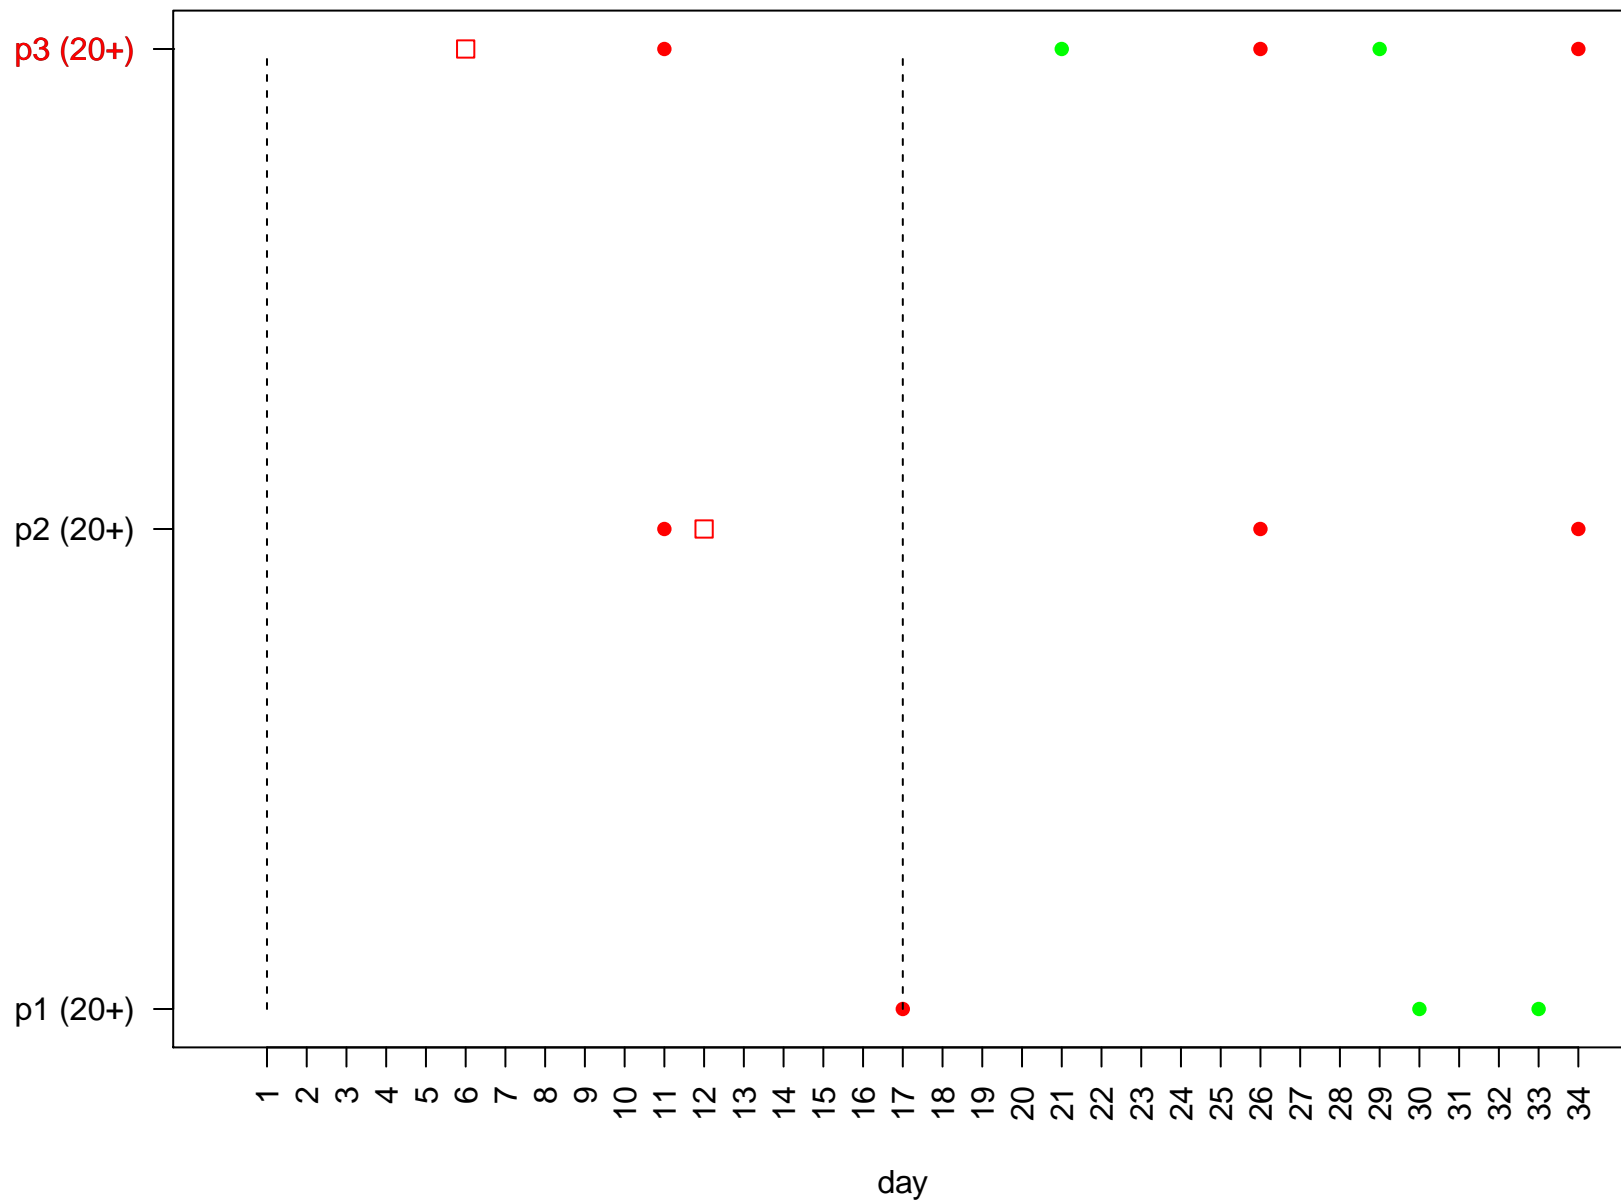



# Household 211

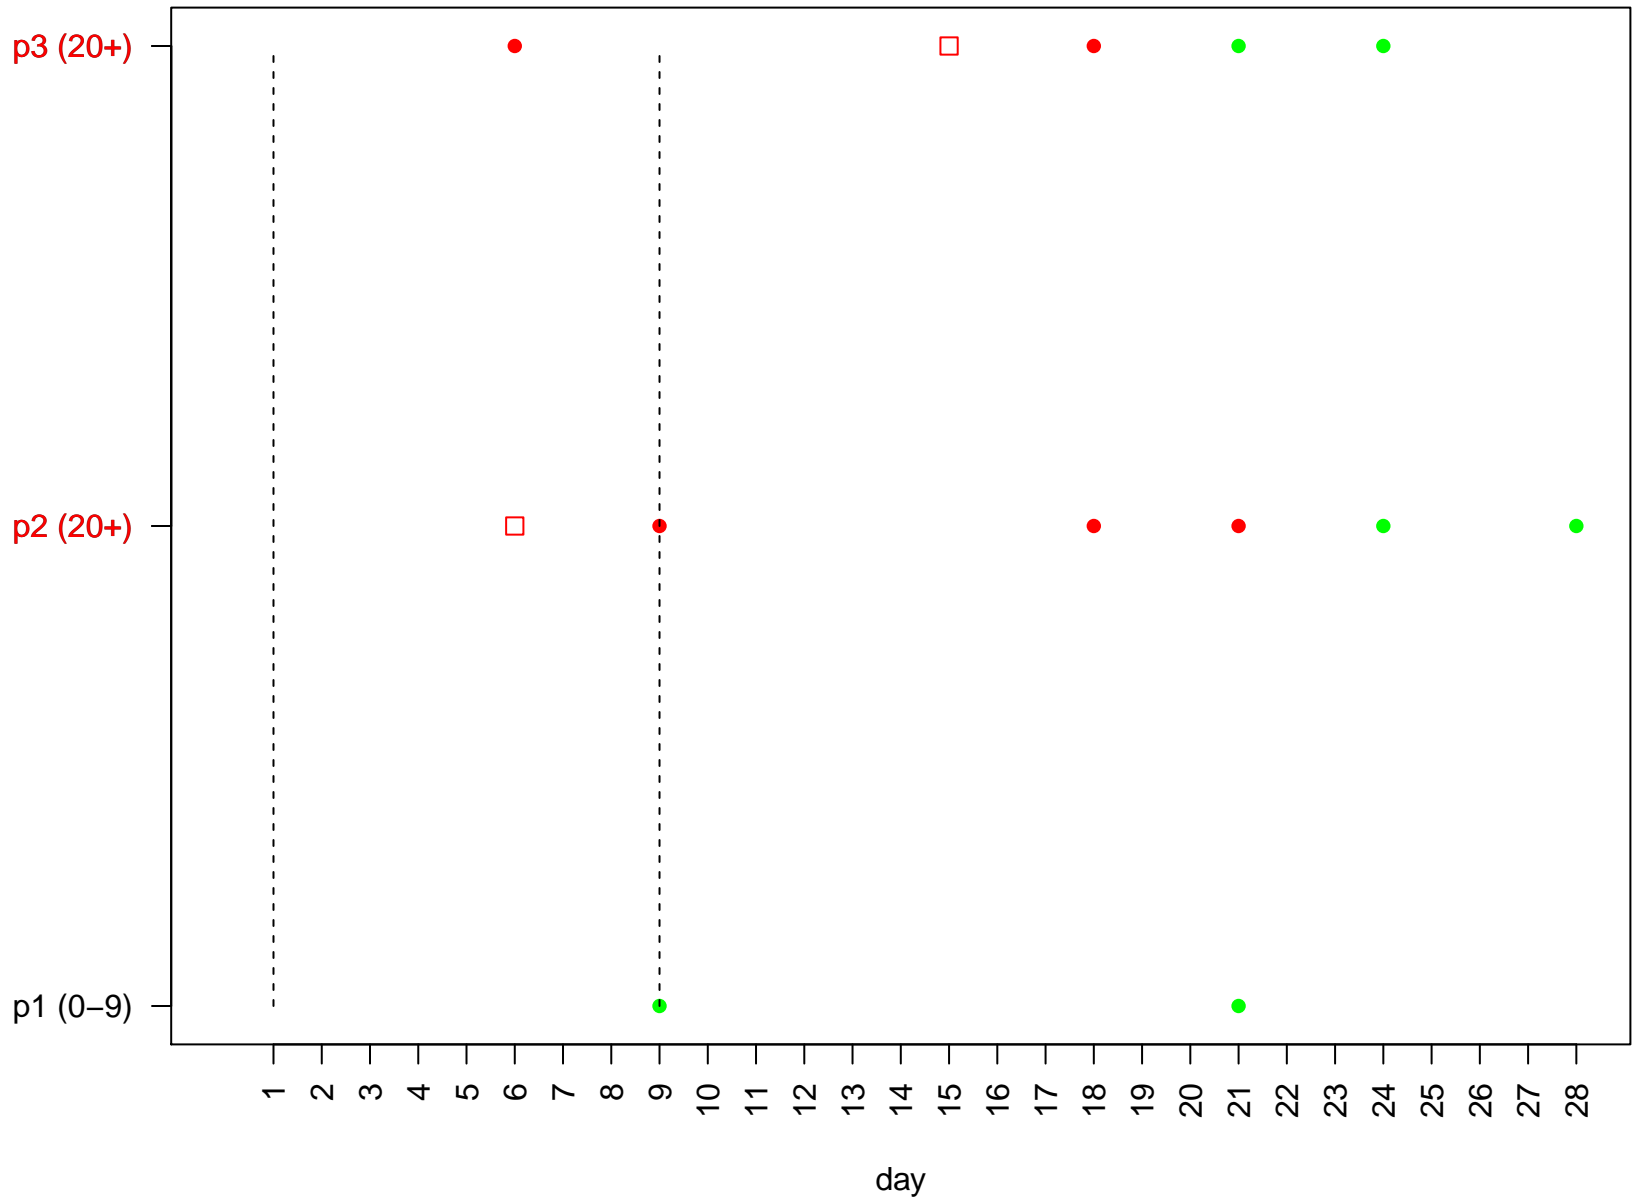

# Household 214

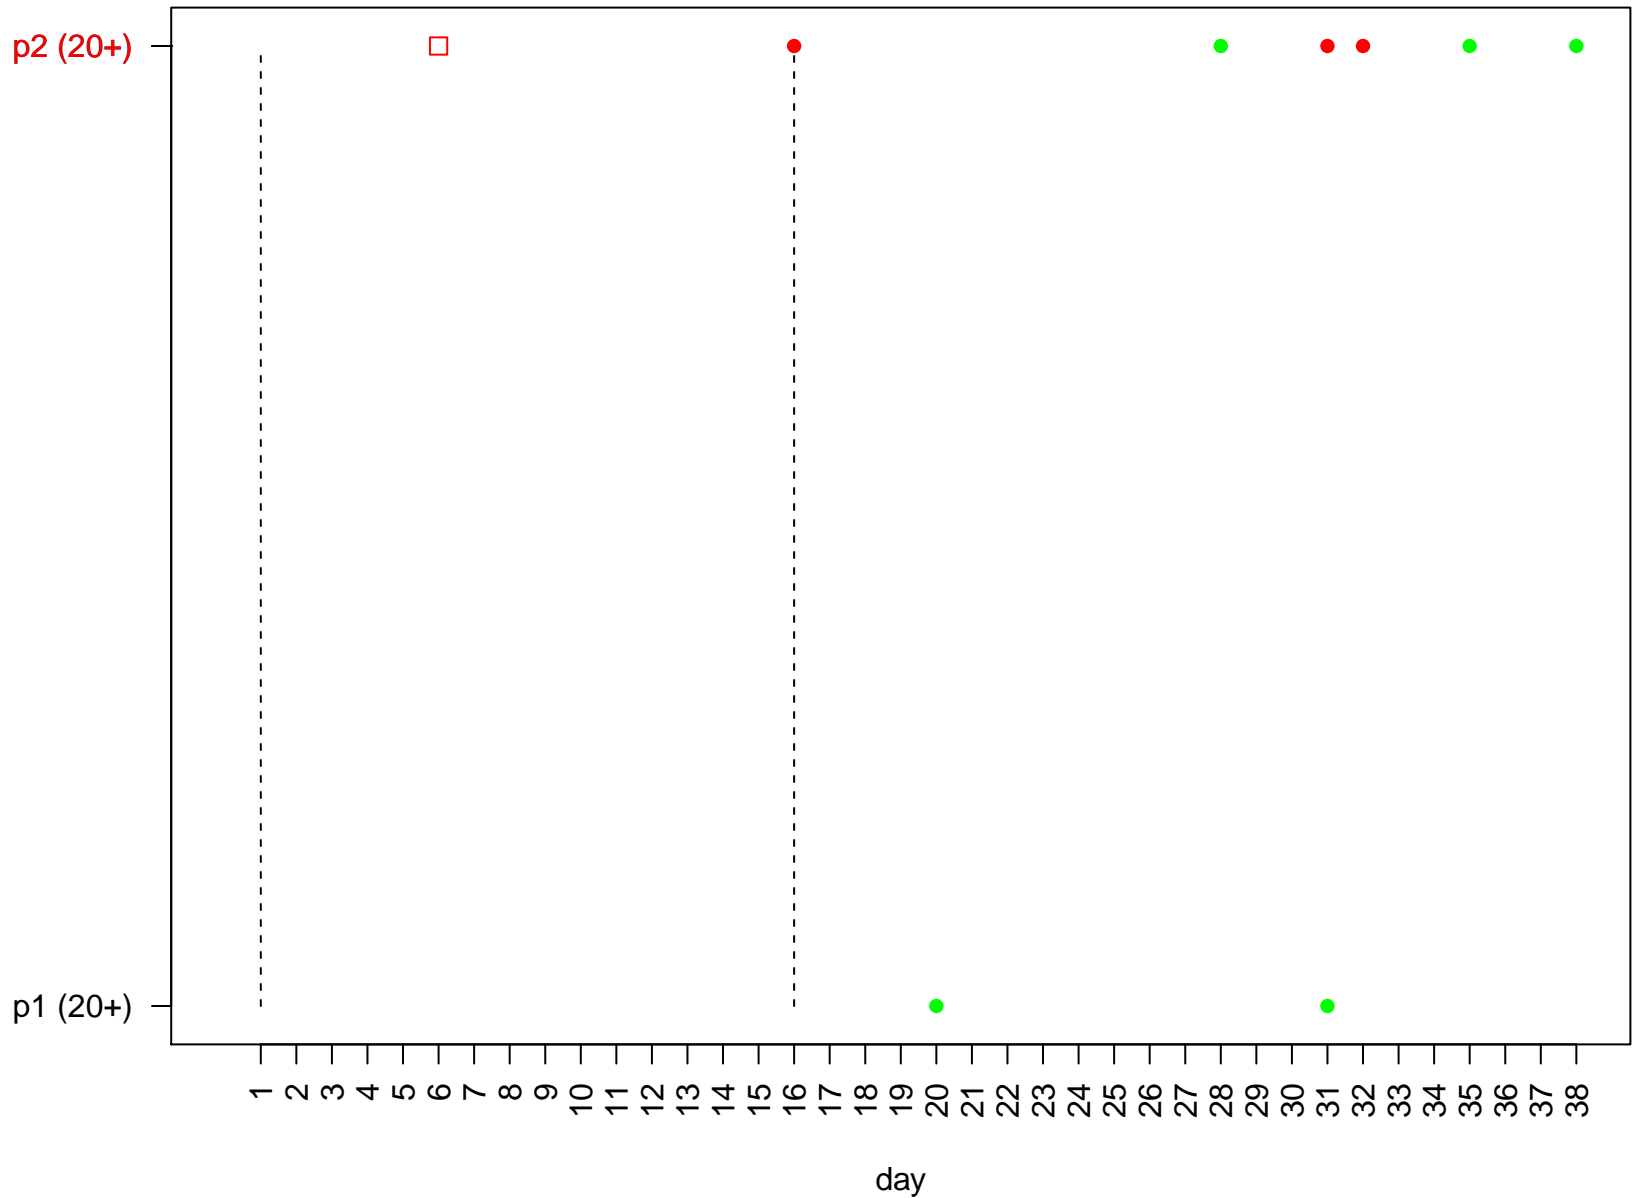

# Household 216

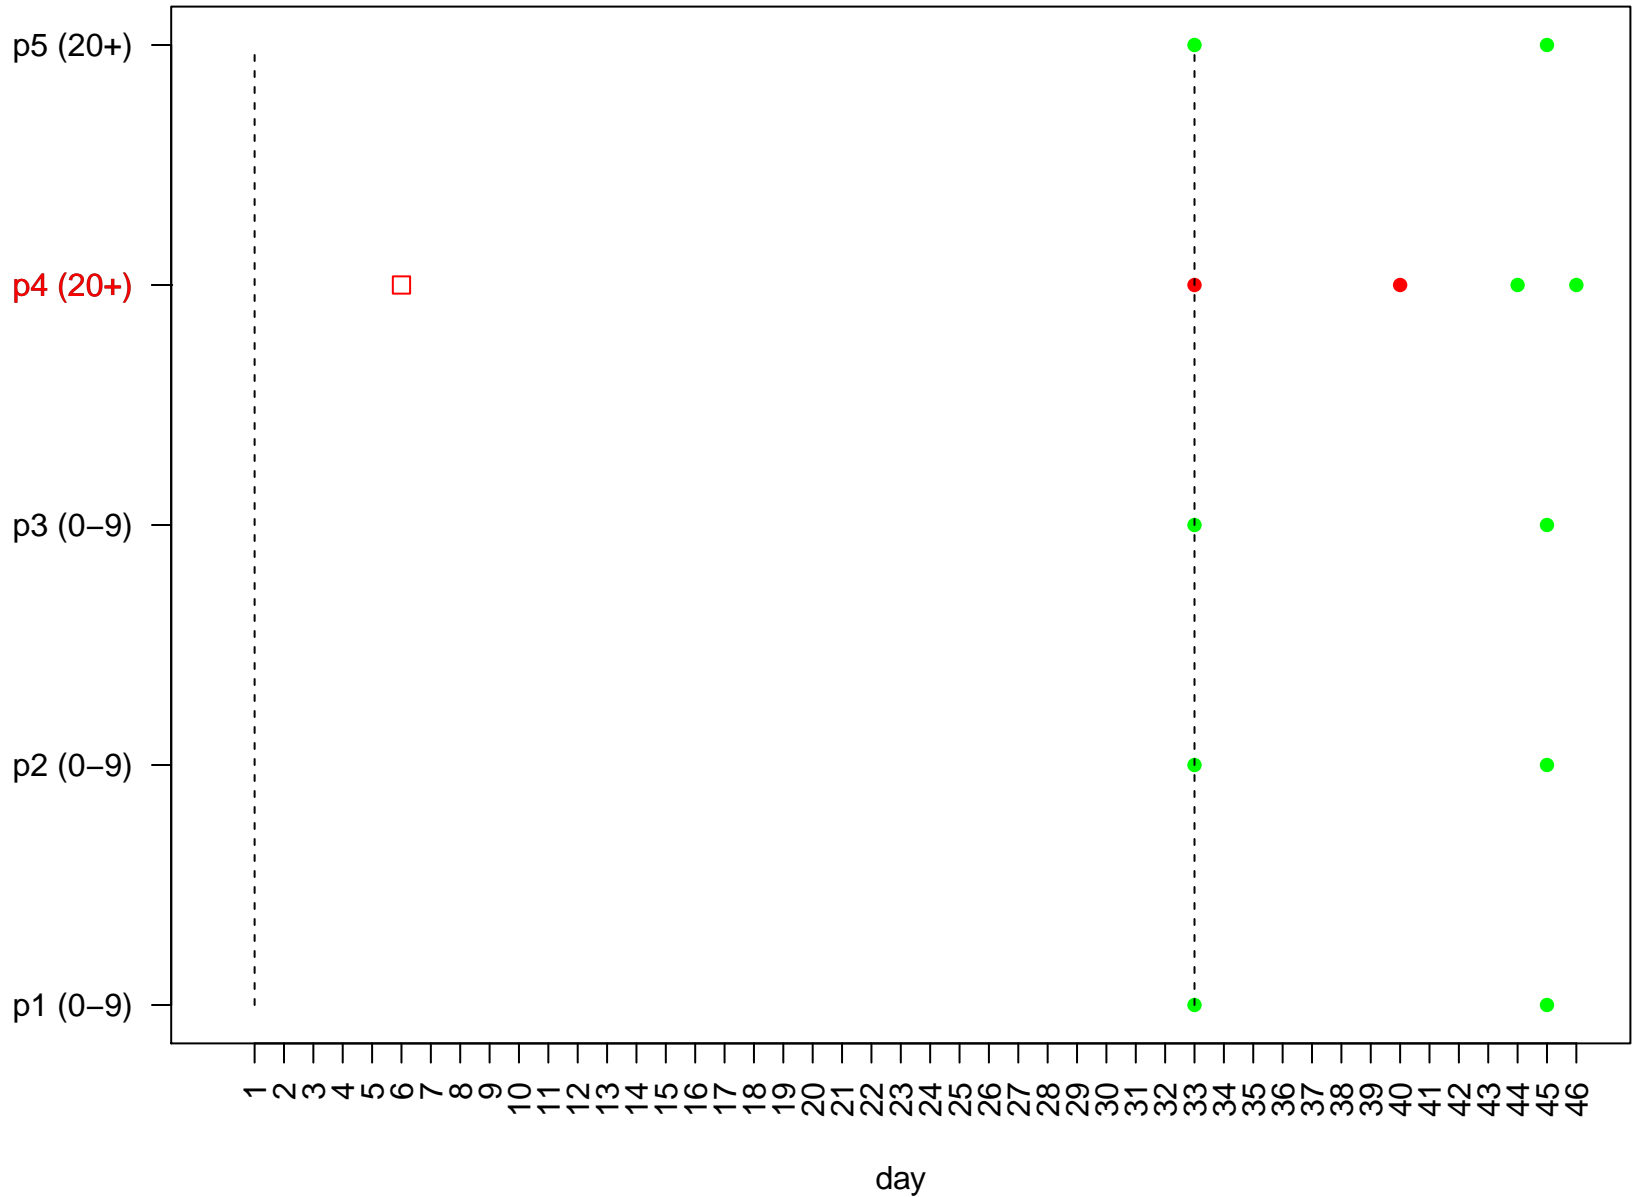

# Household 217

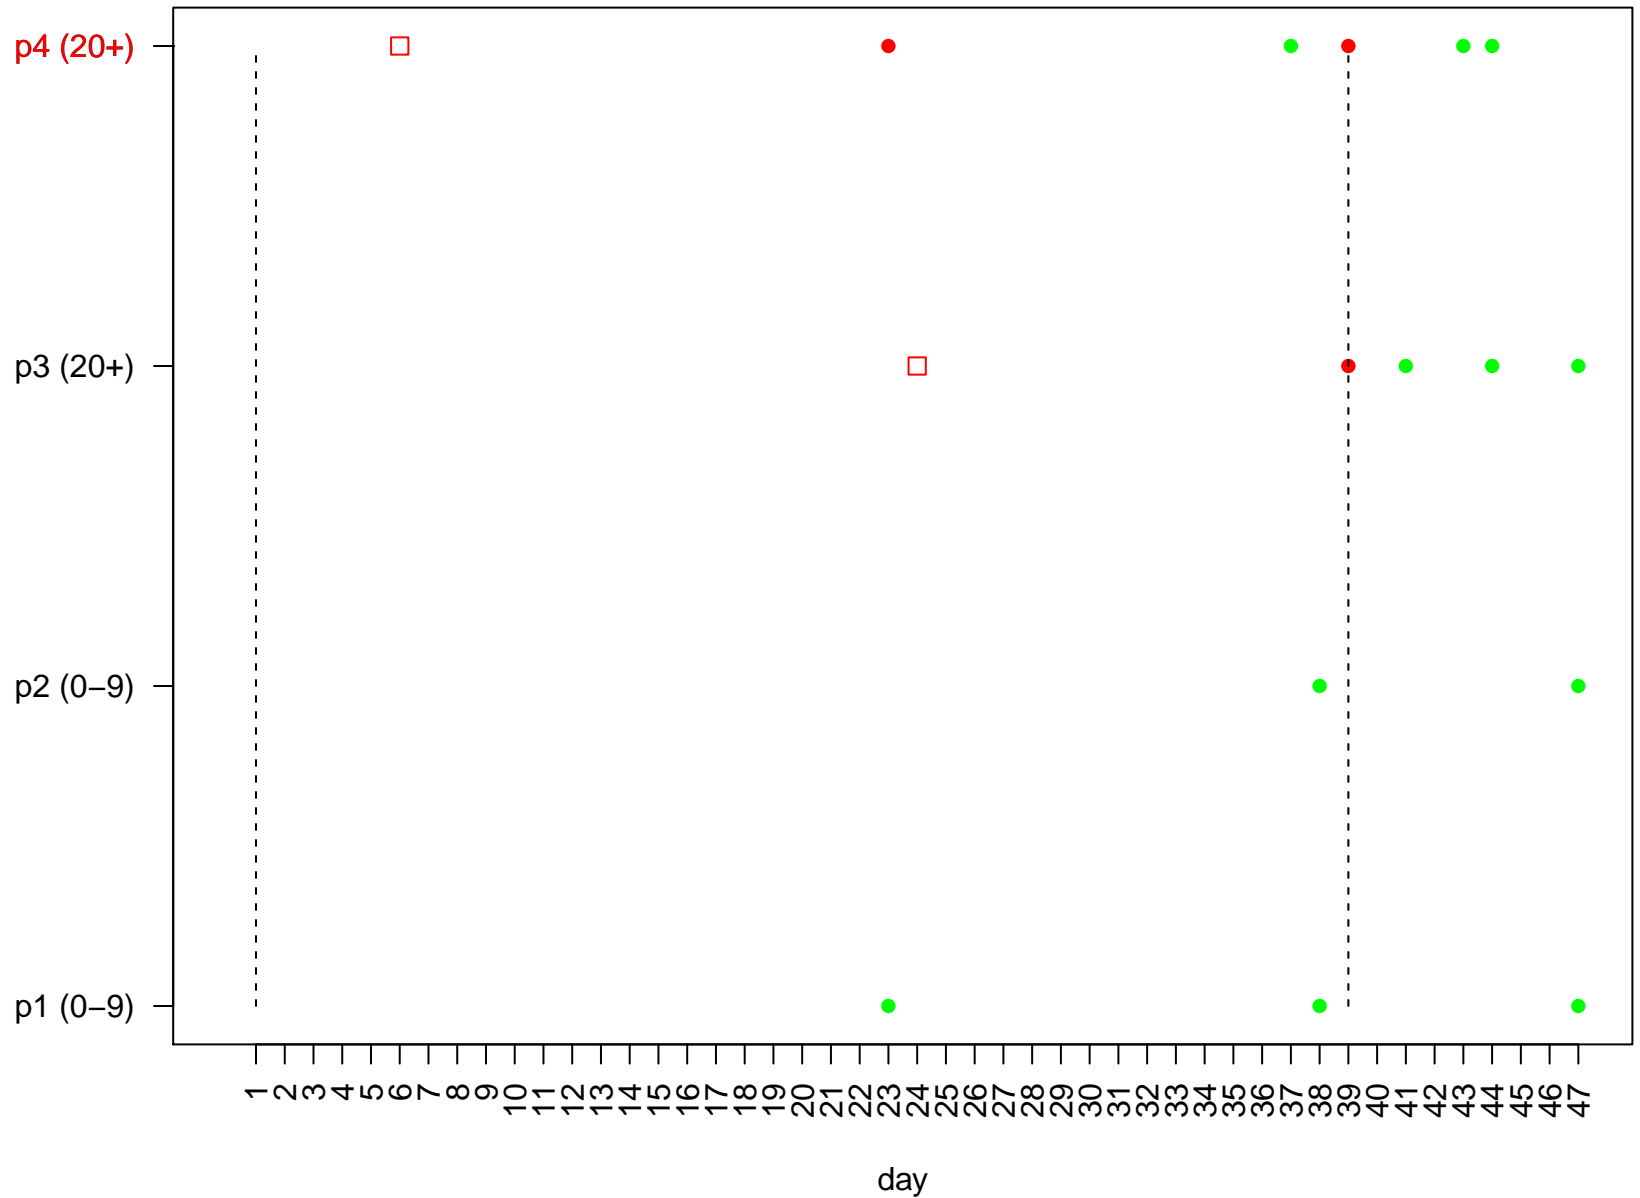

# Household 219

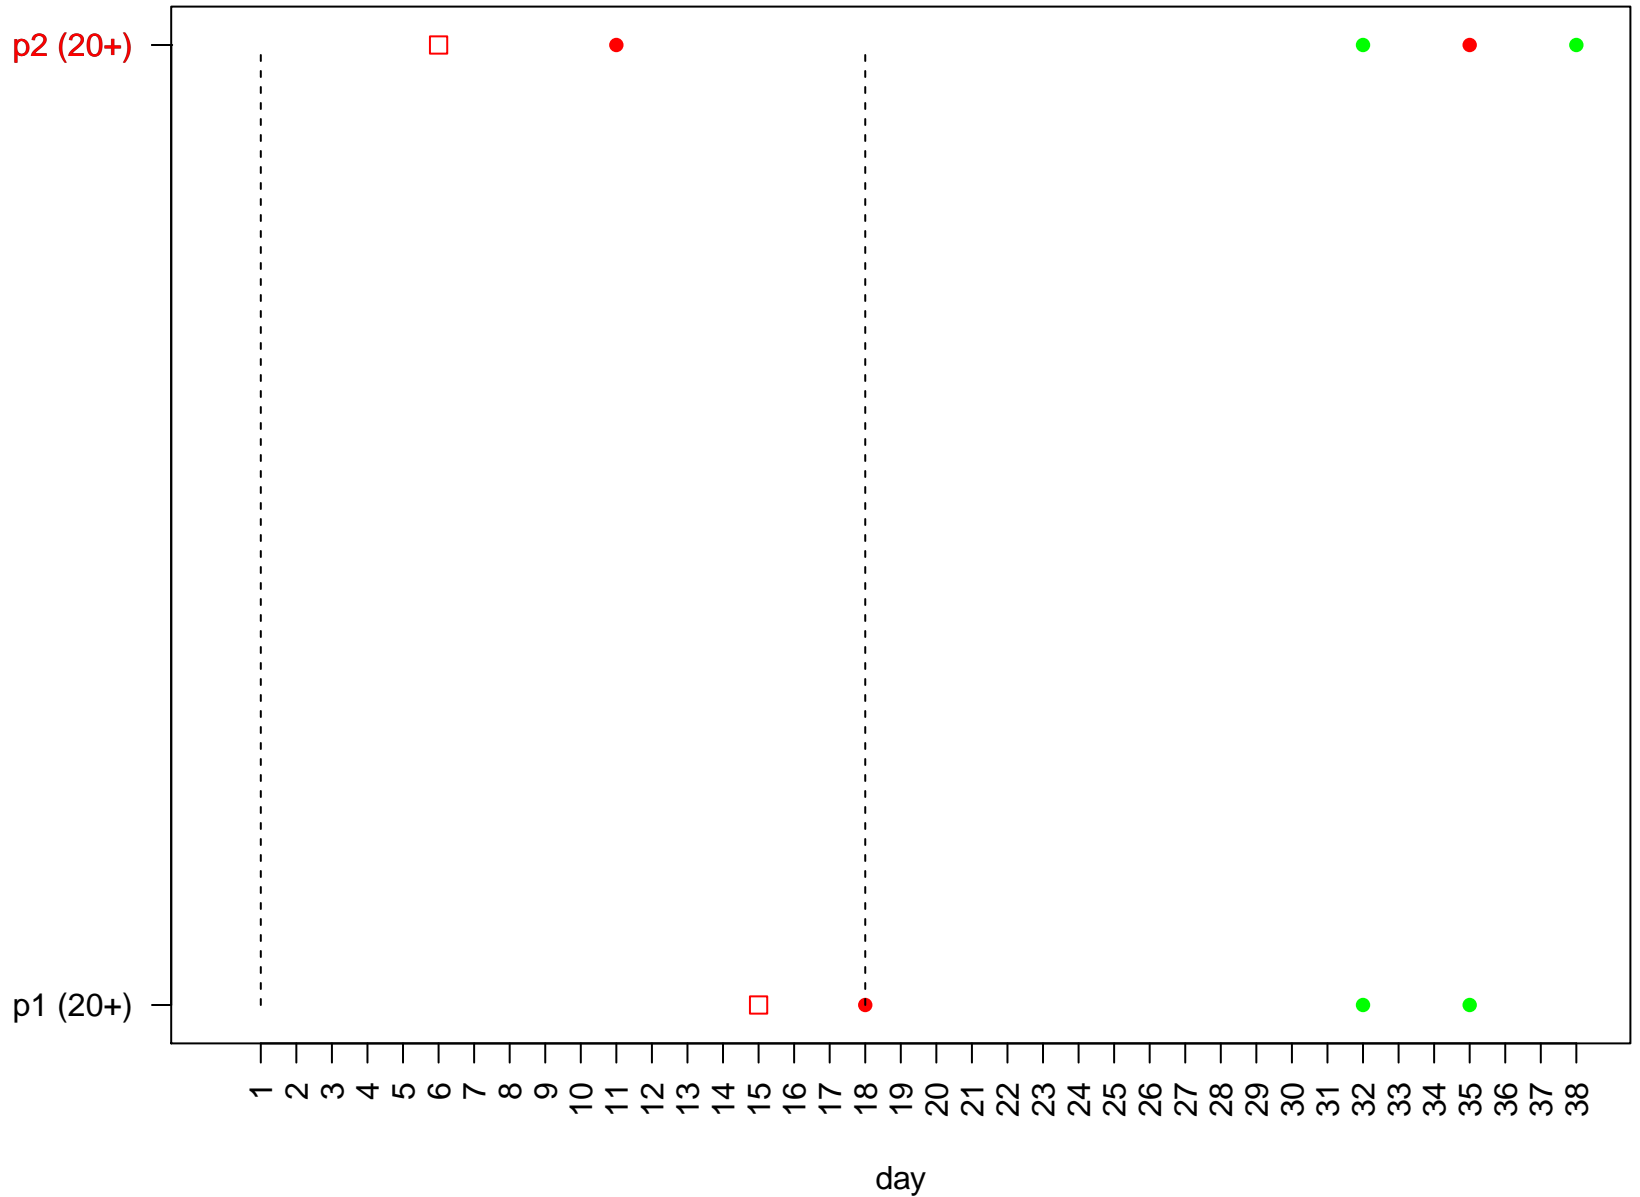

# Household 220

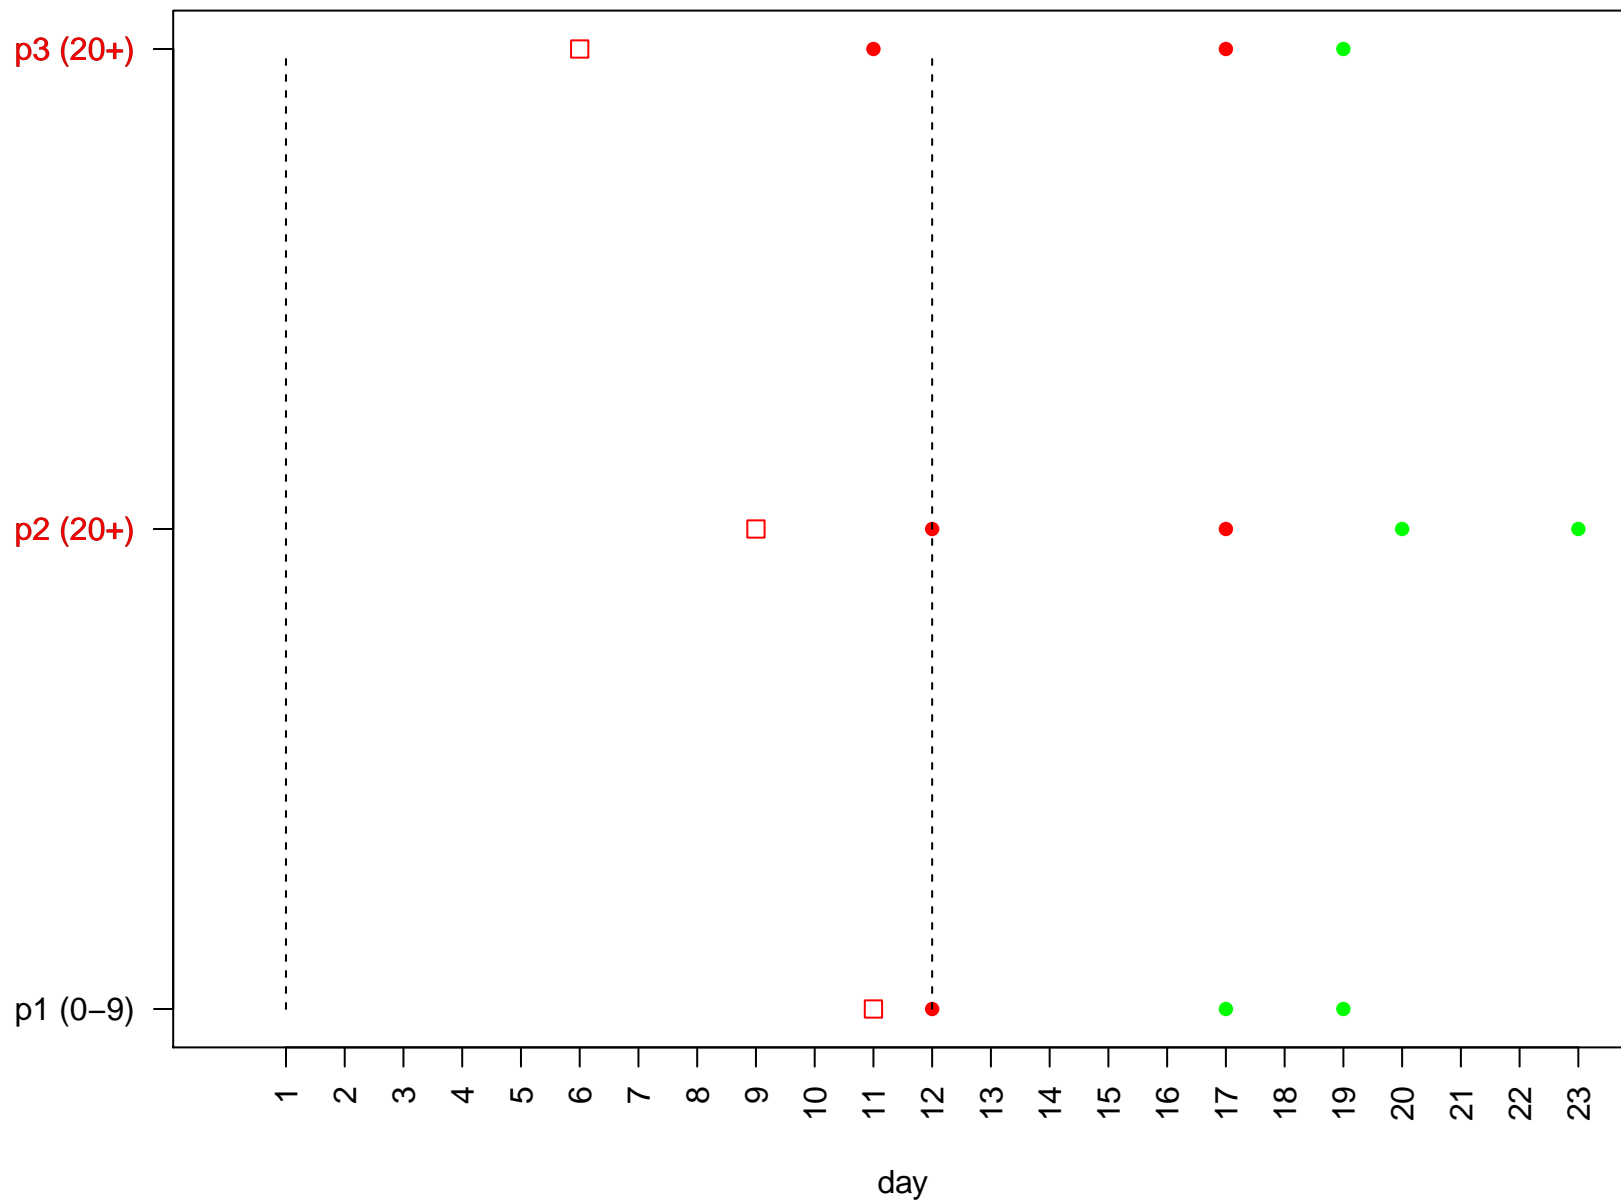

# Household 221

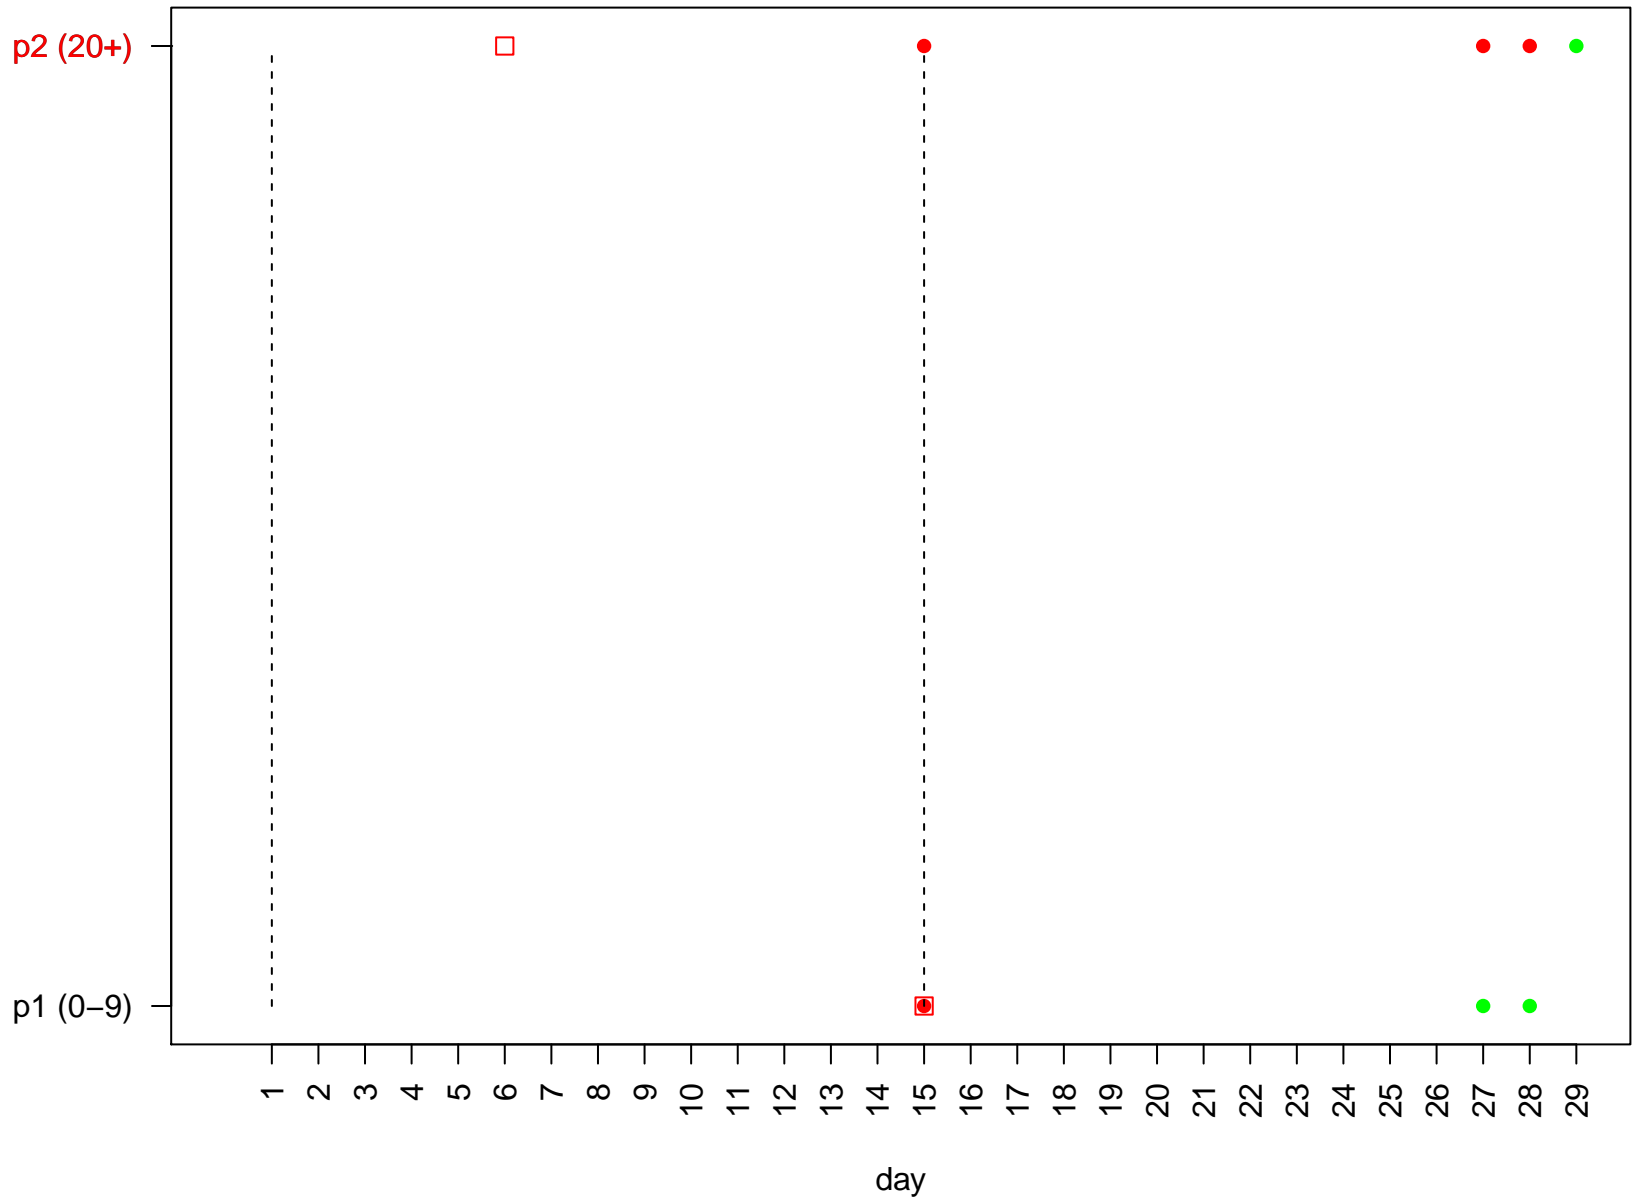

# Household 222

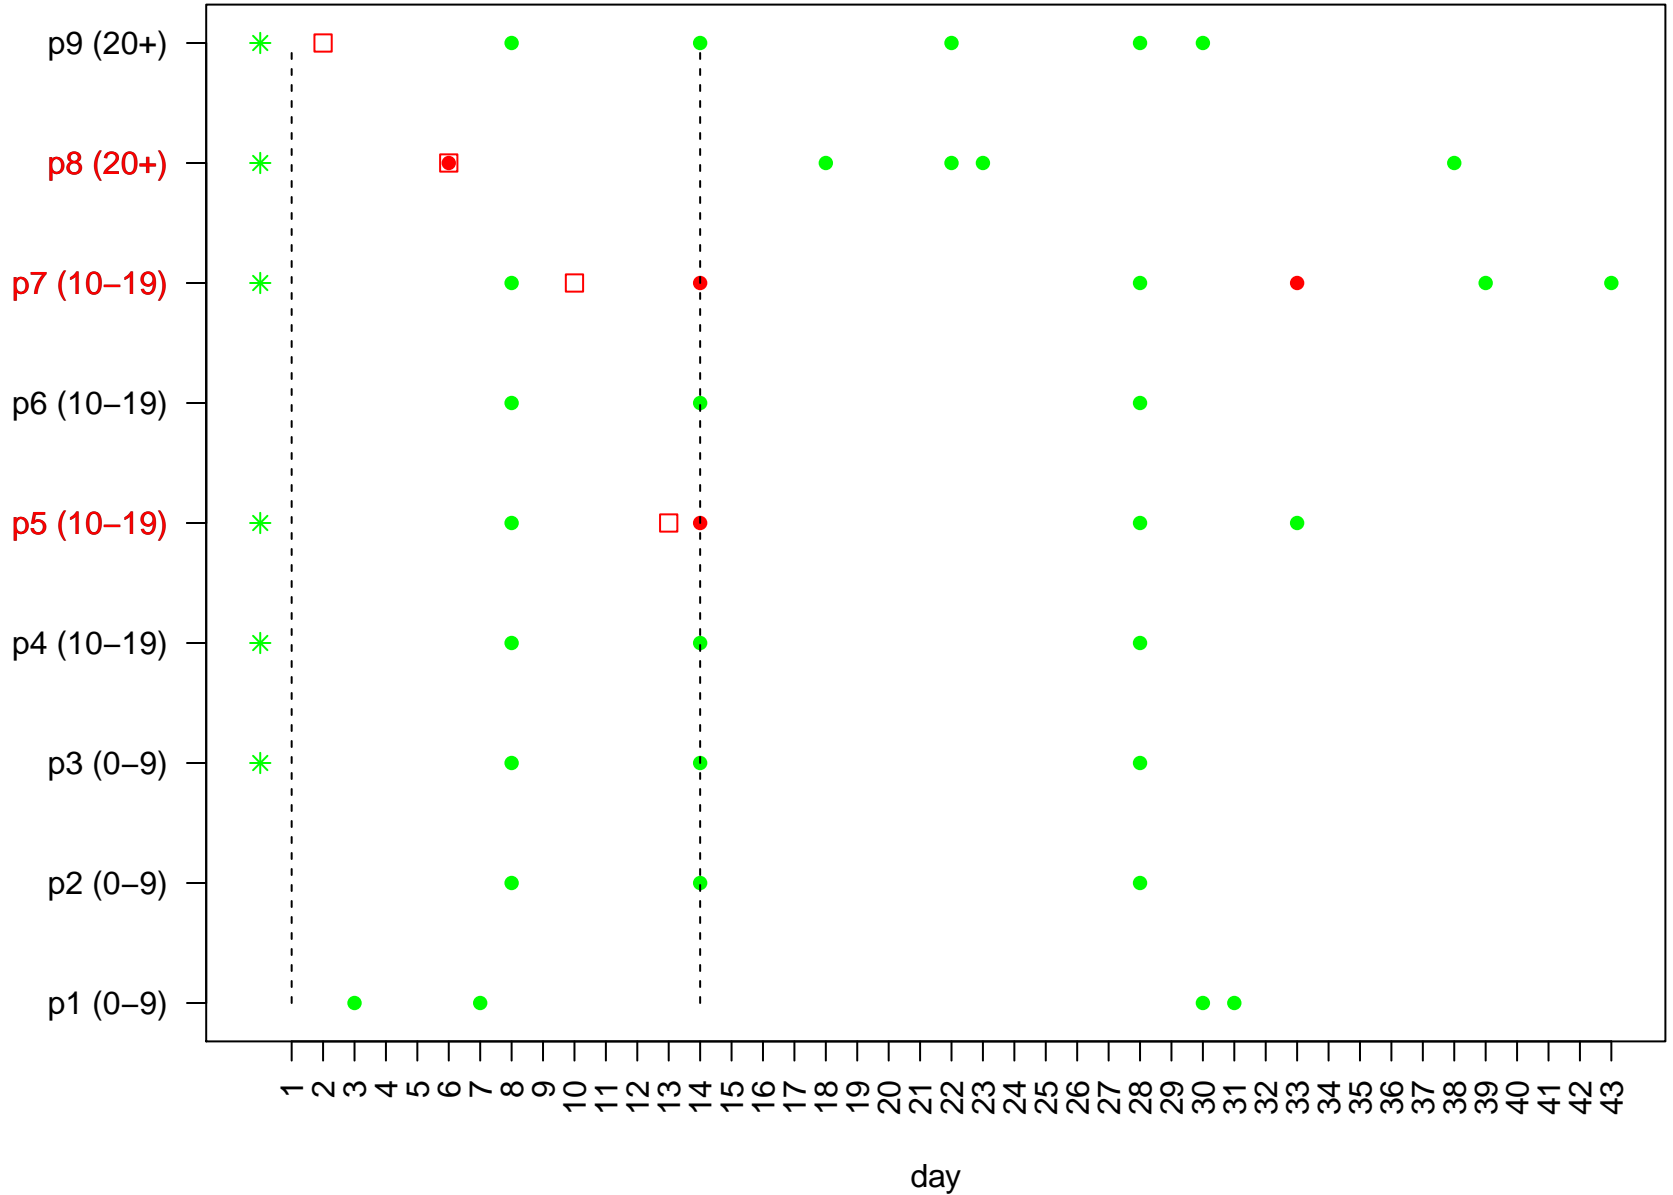



# Household 223

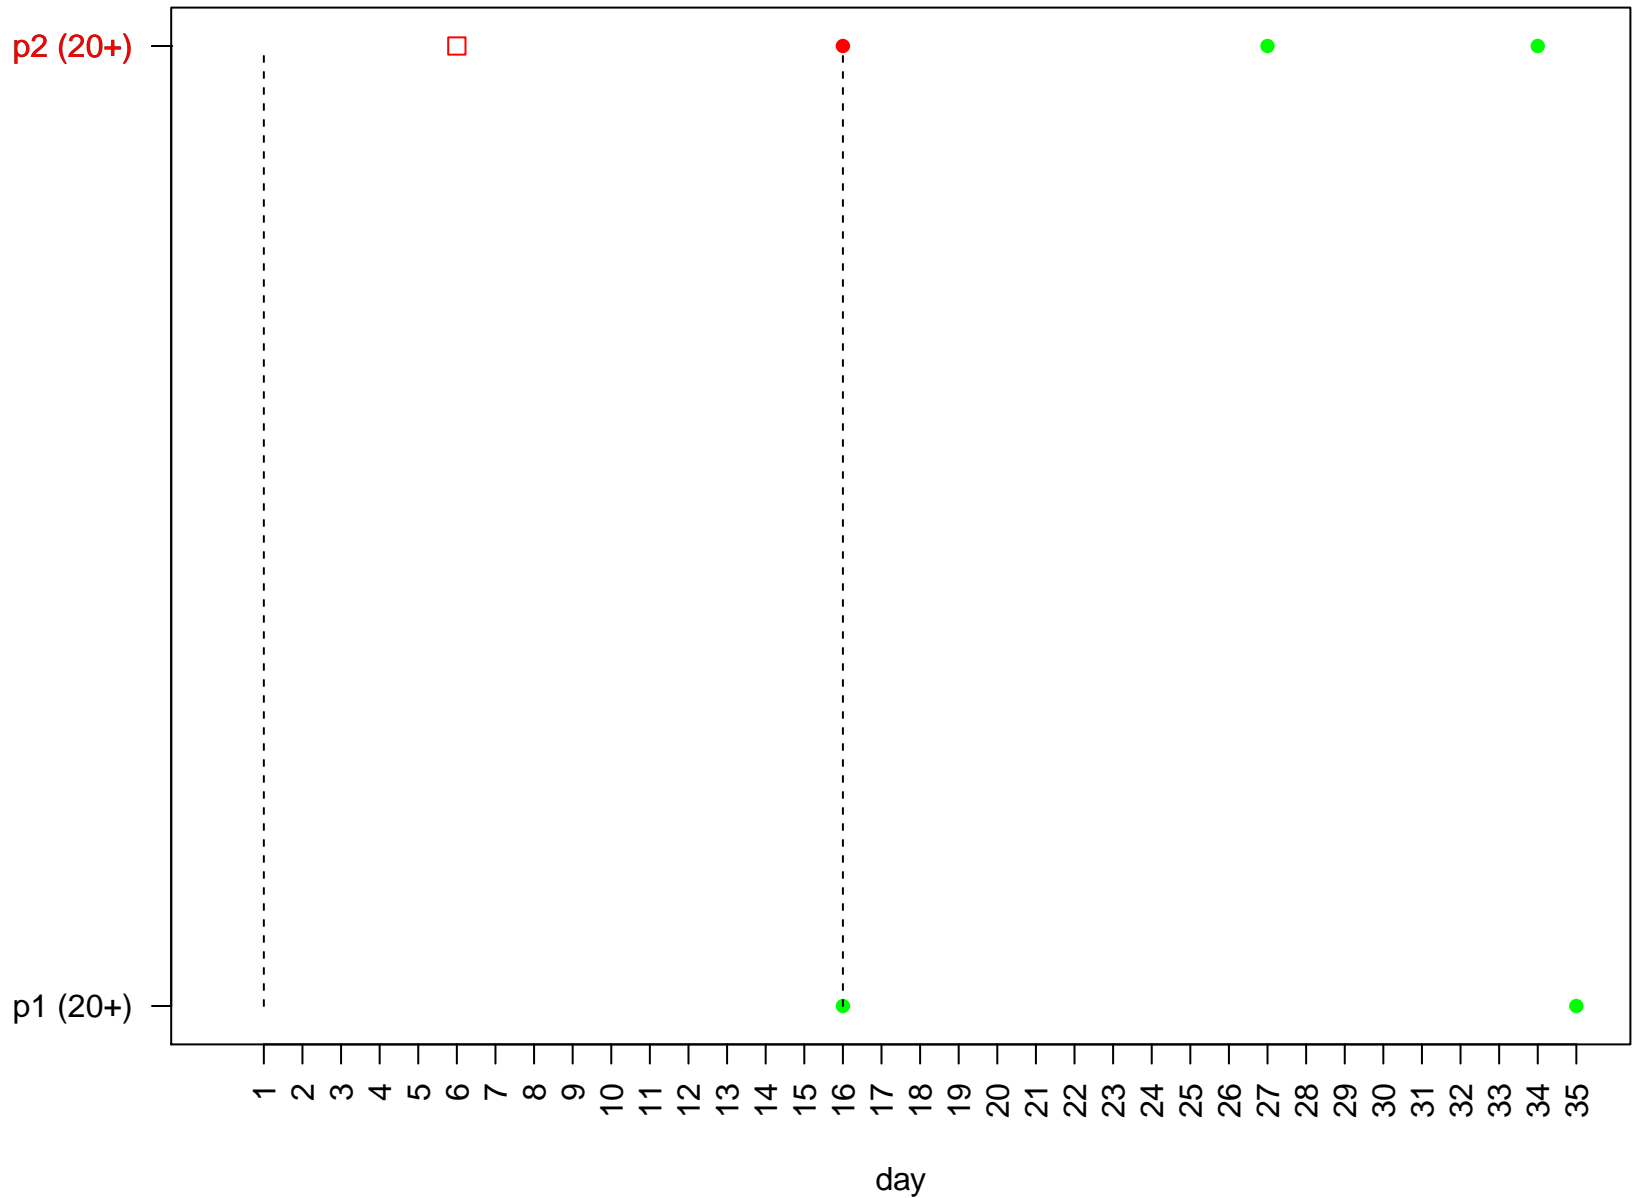

# Household 224

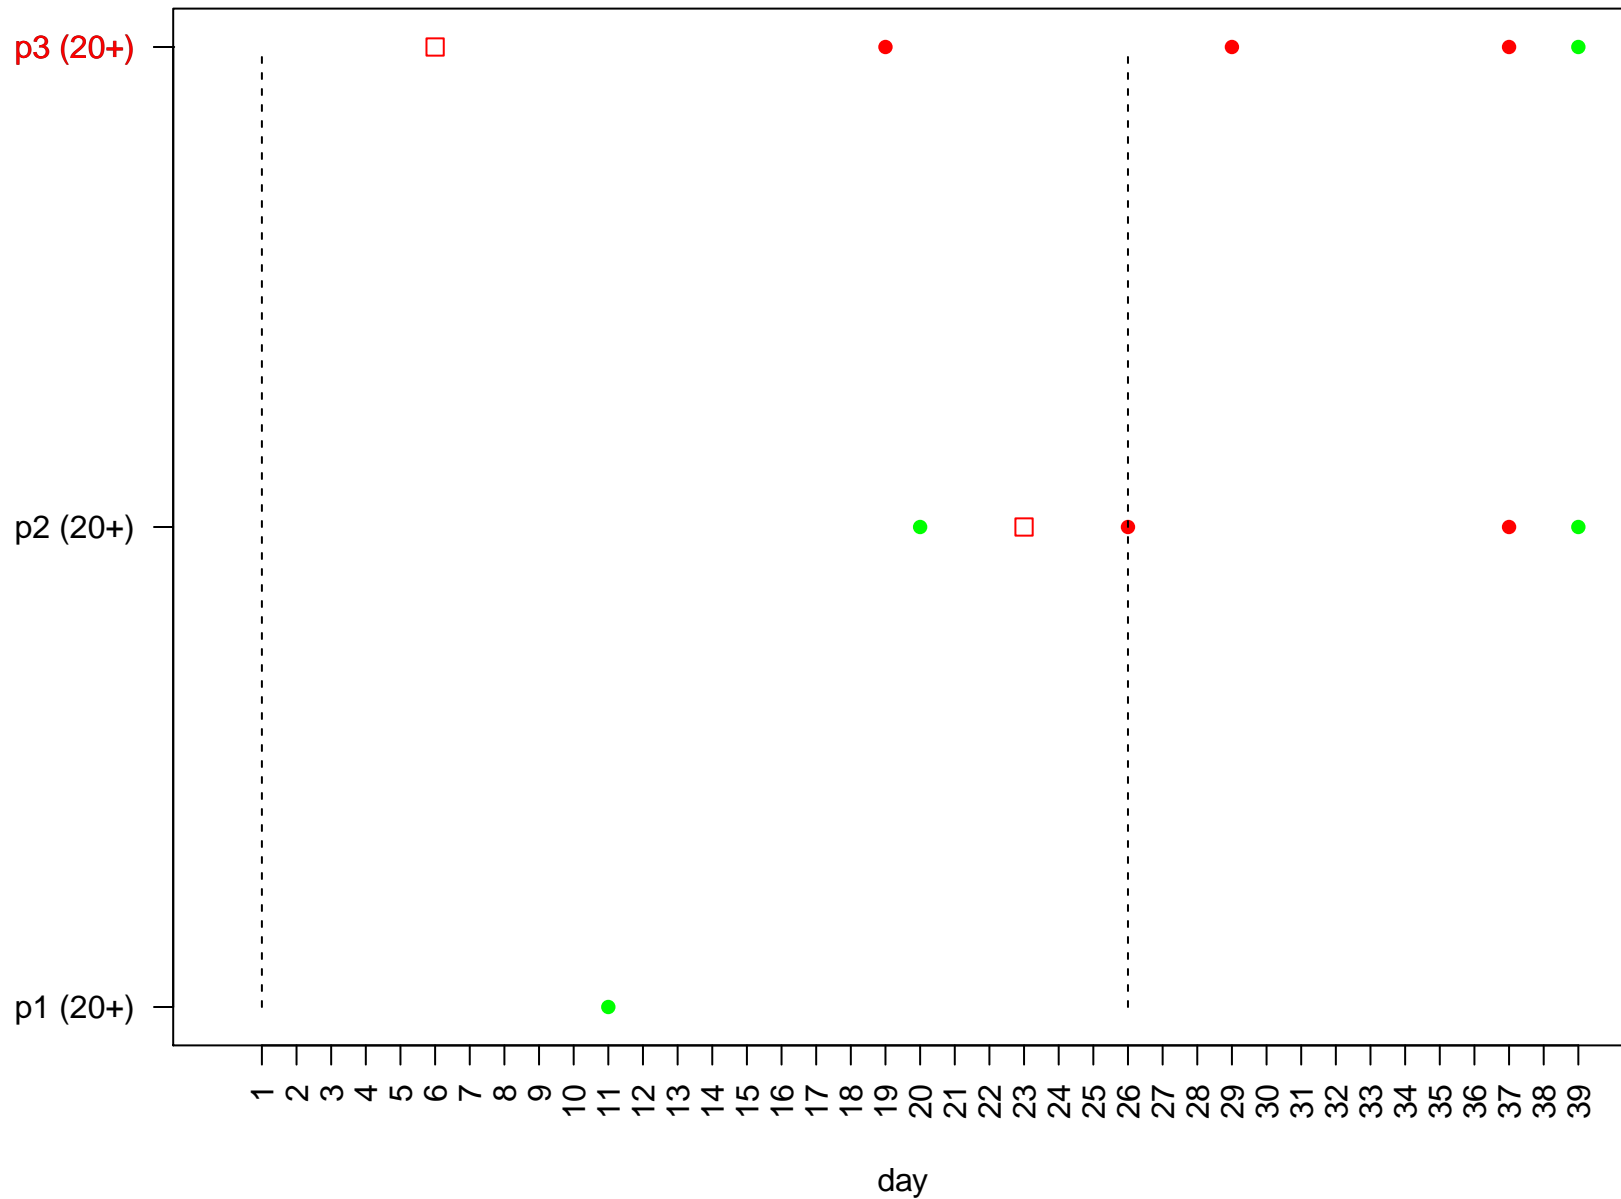

# Household 225

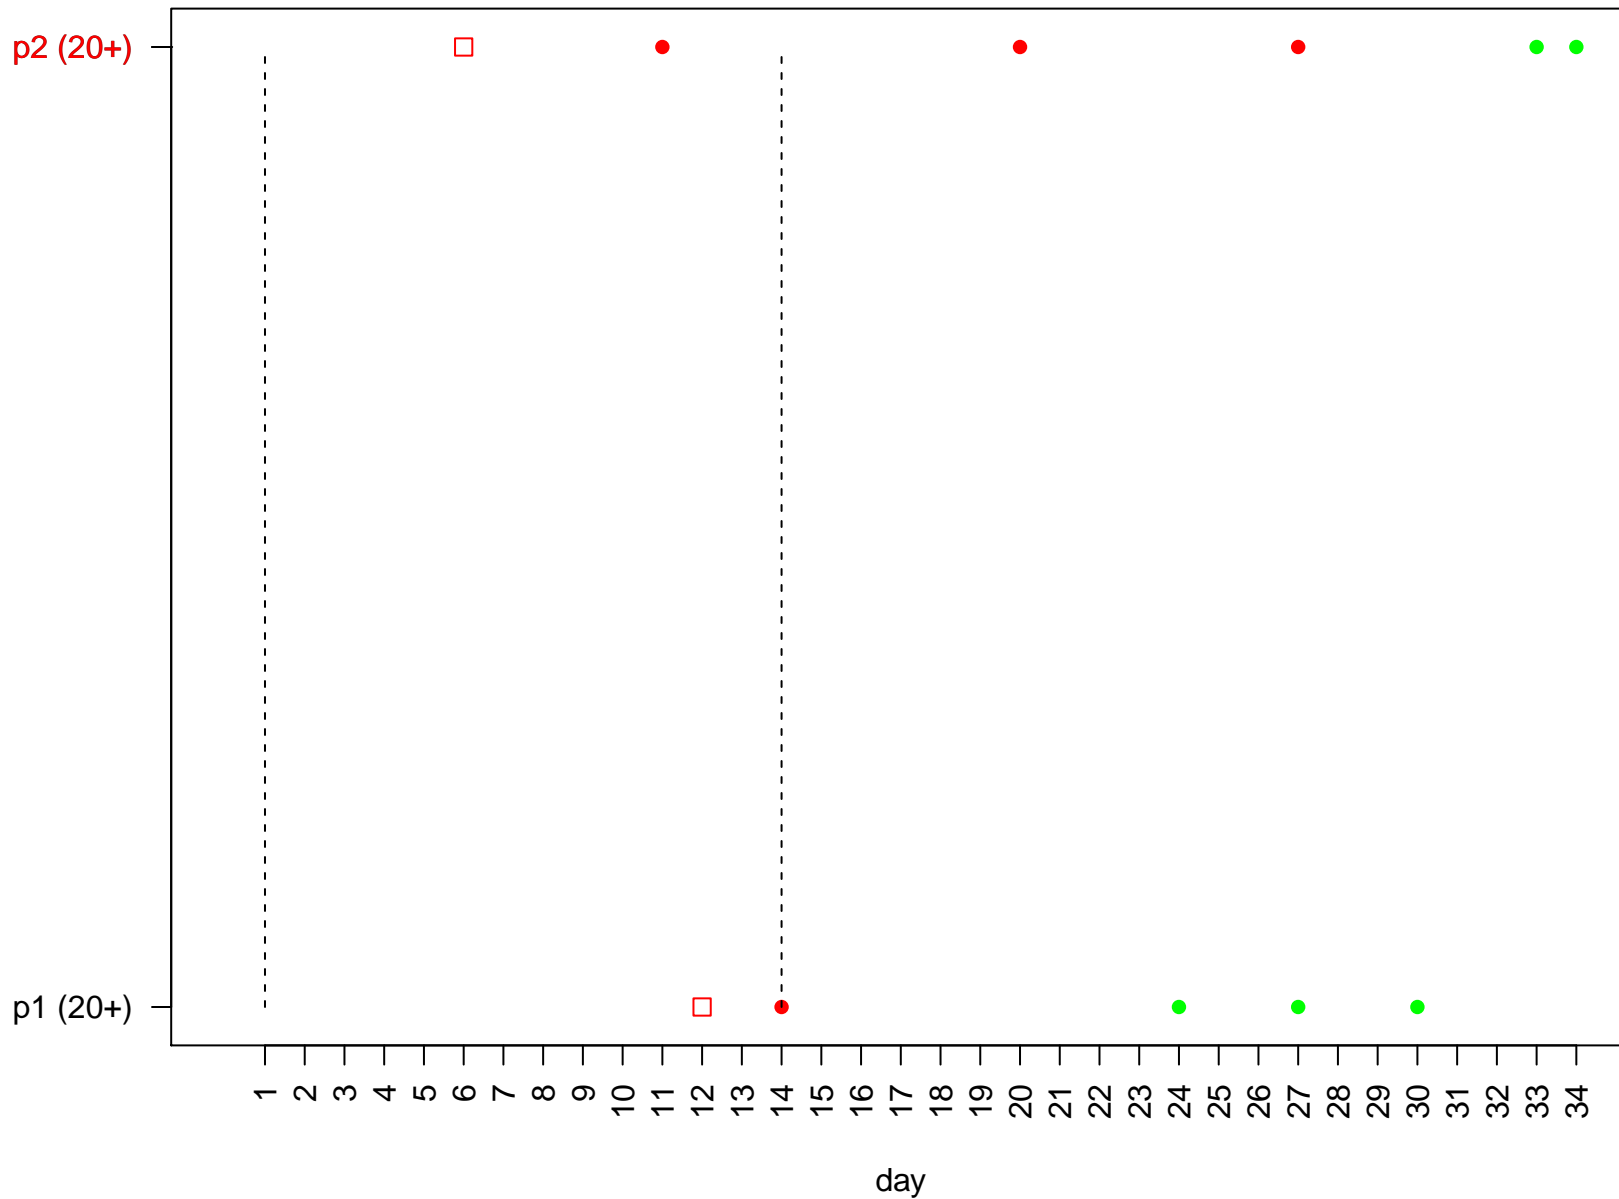

# Household 226

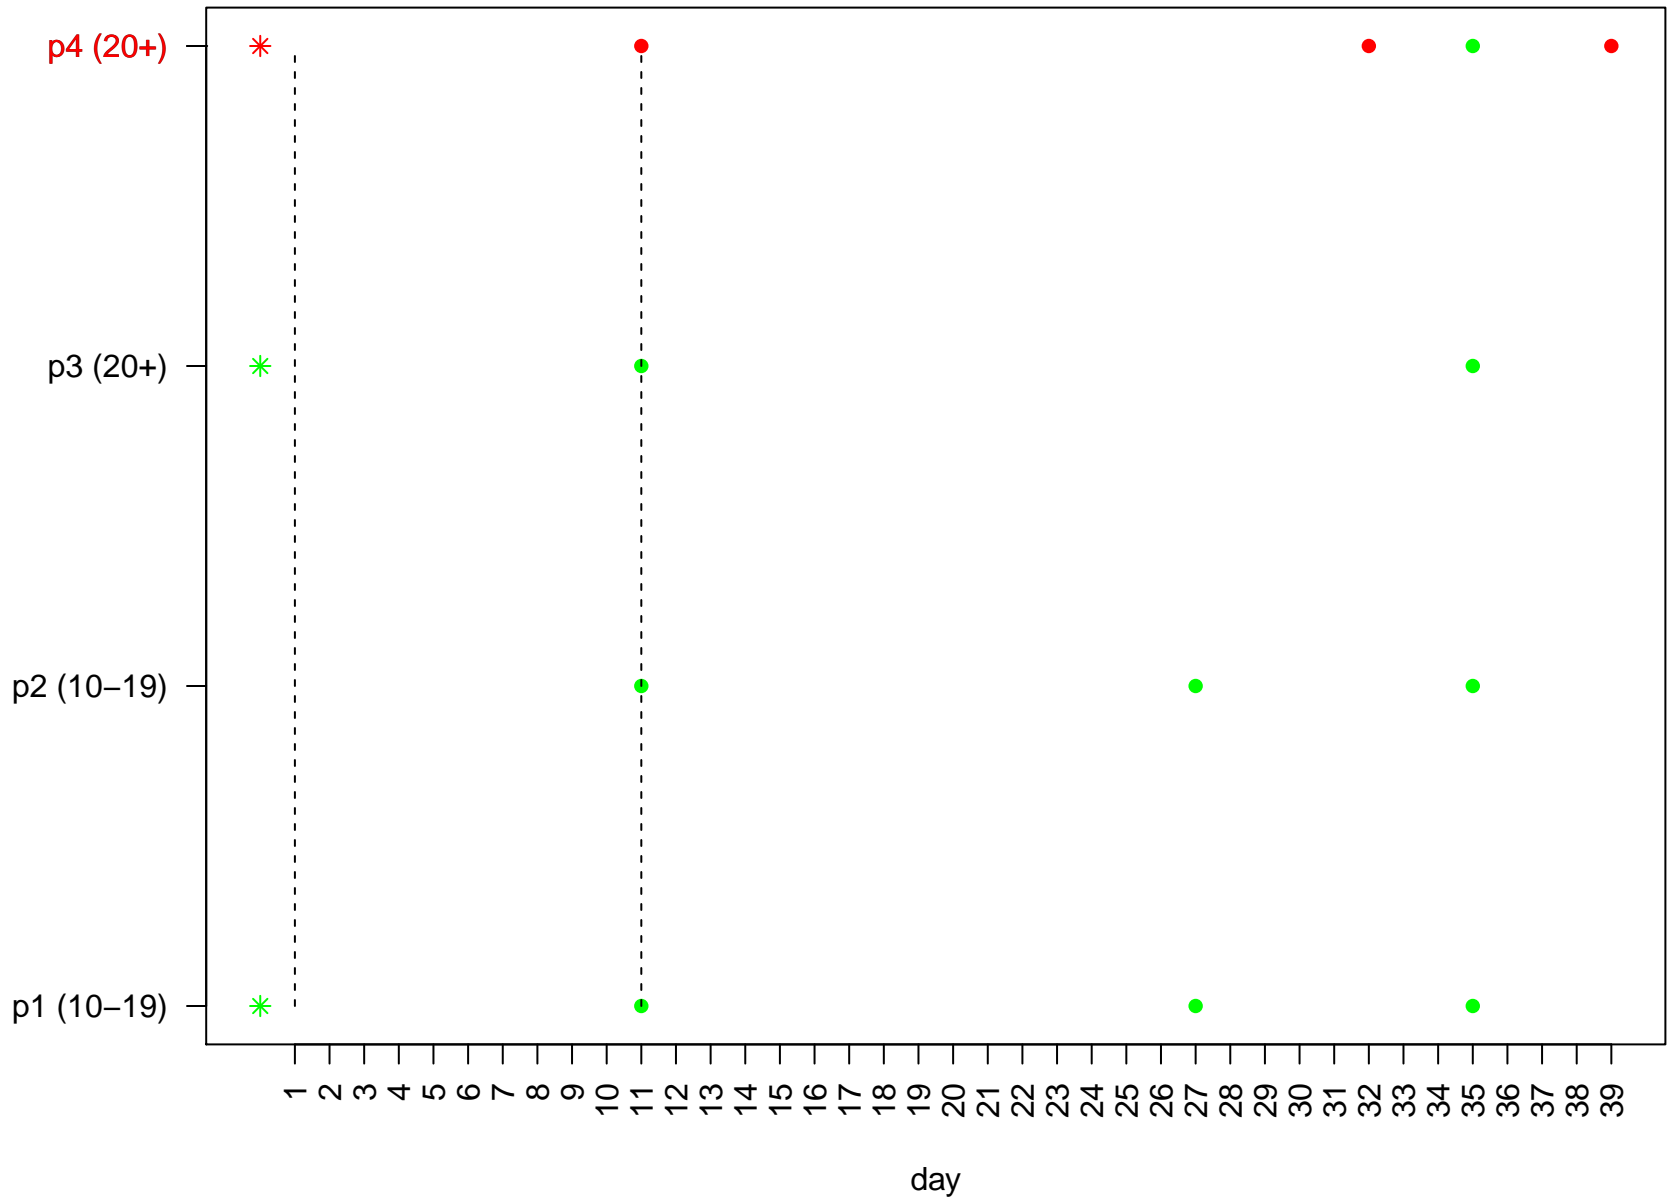

# Household 227

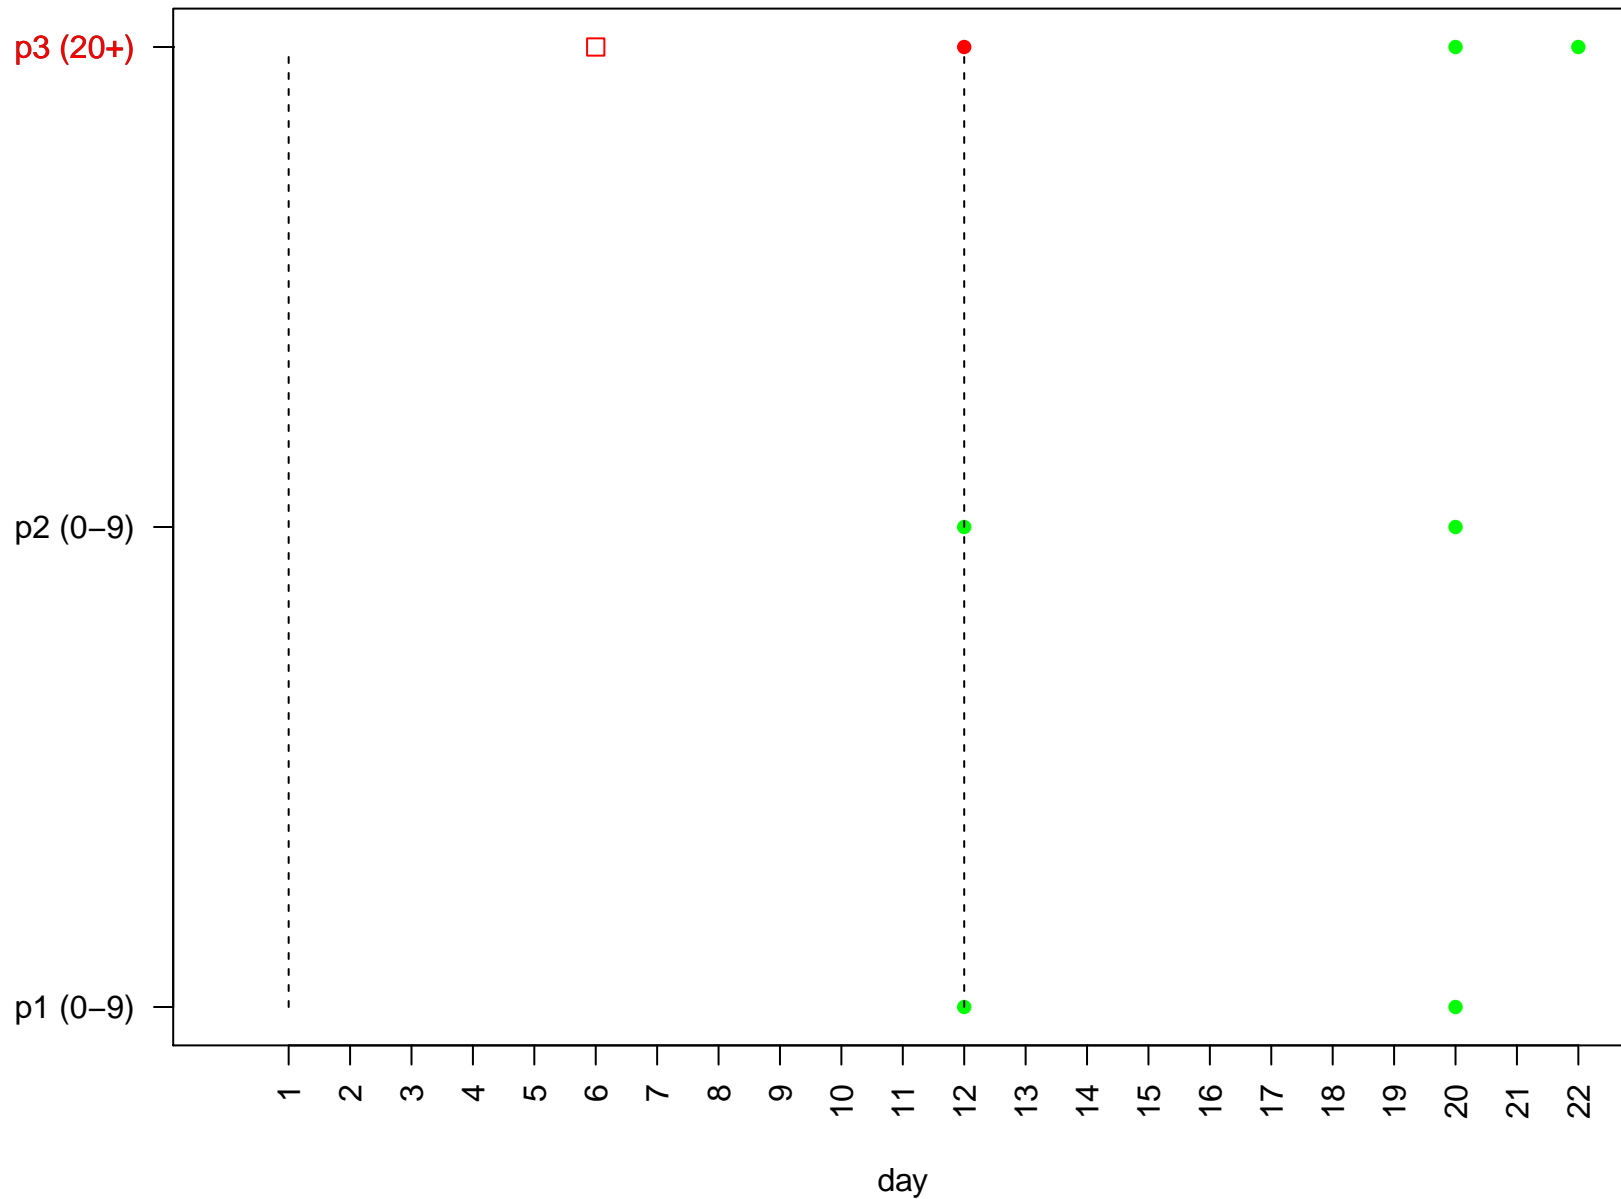

# Household 228

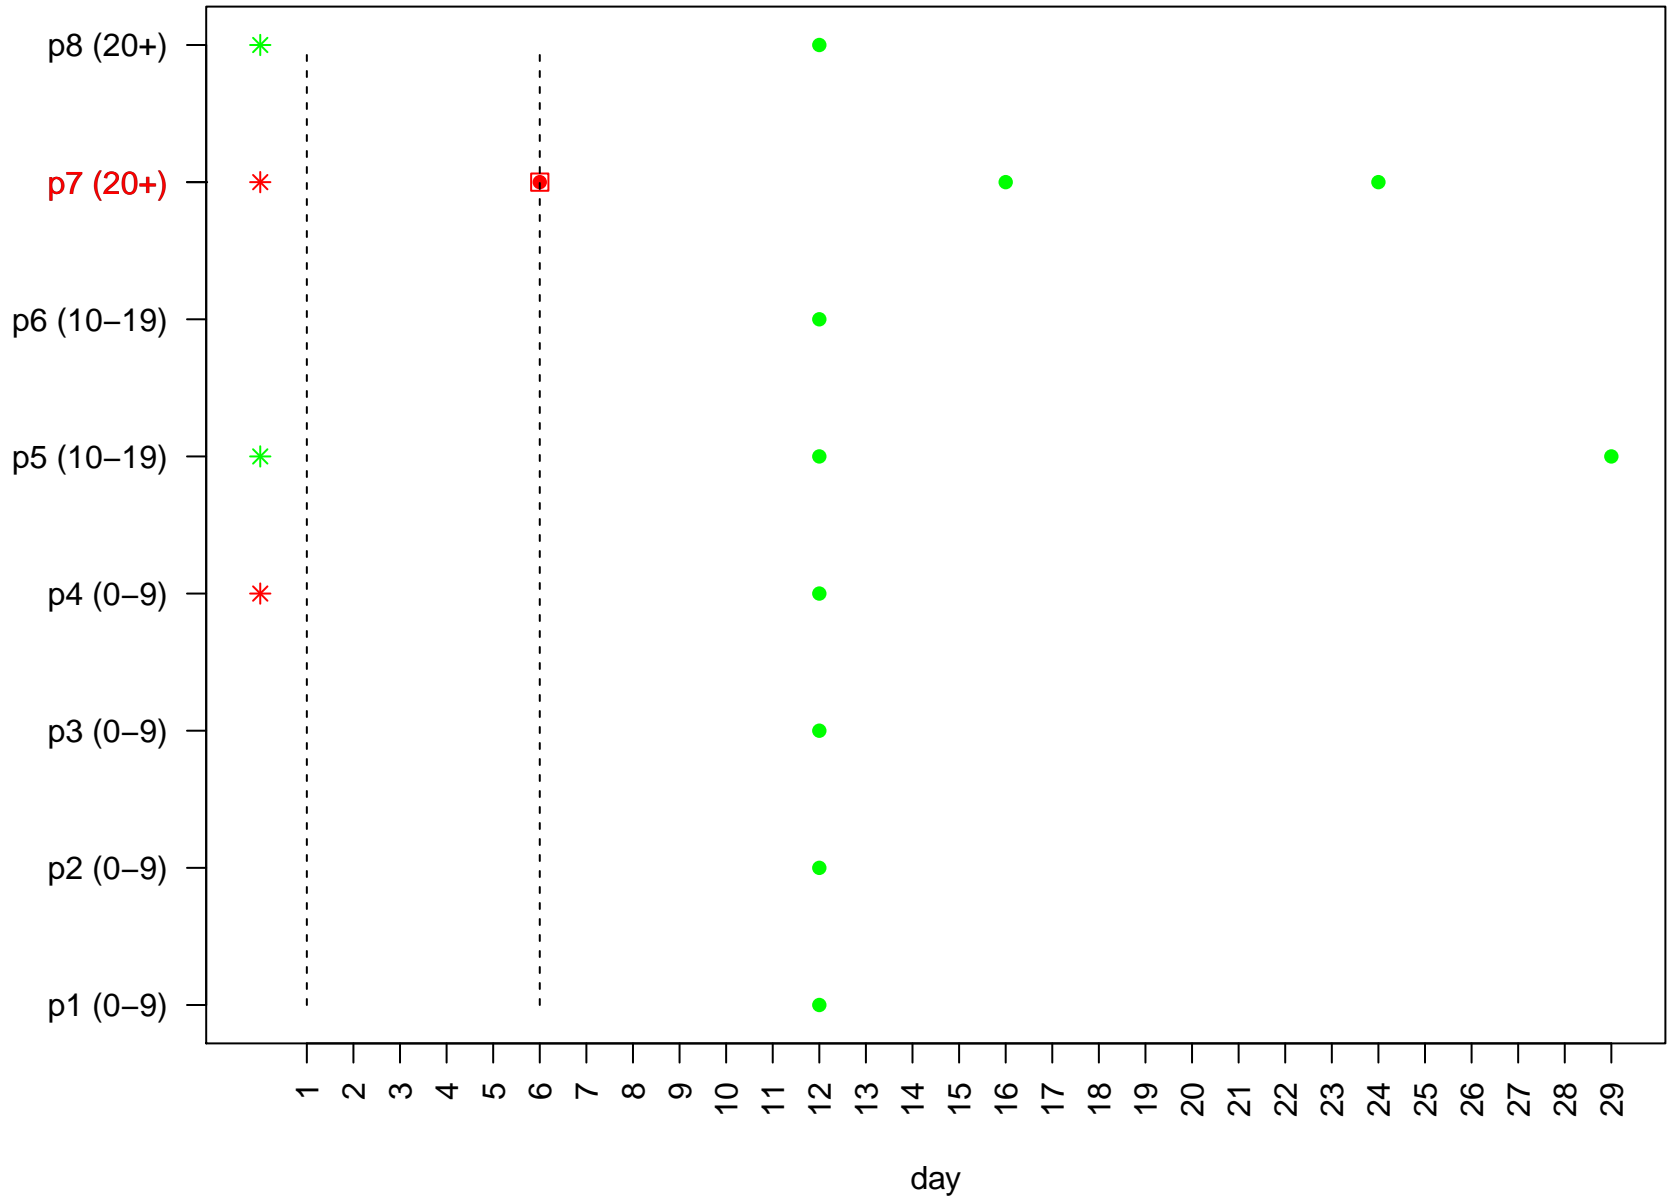

# Household 229

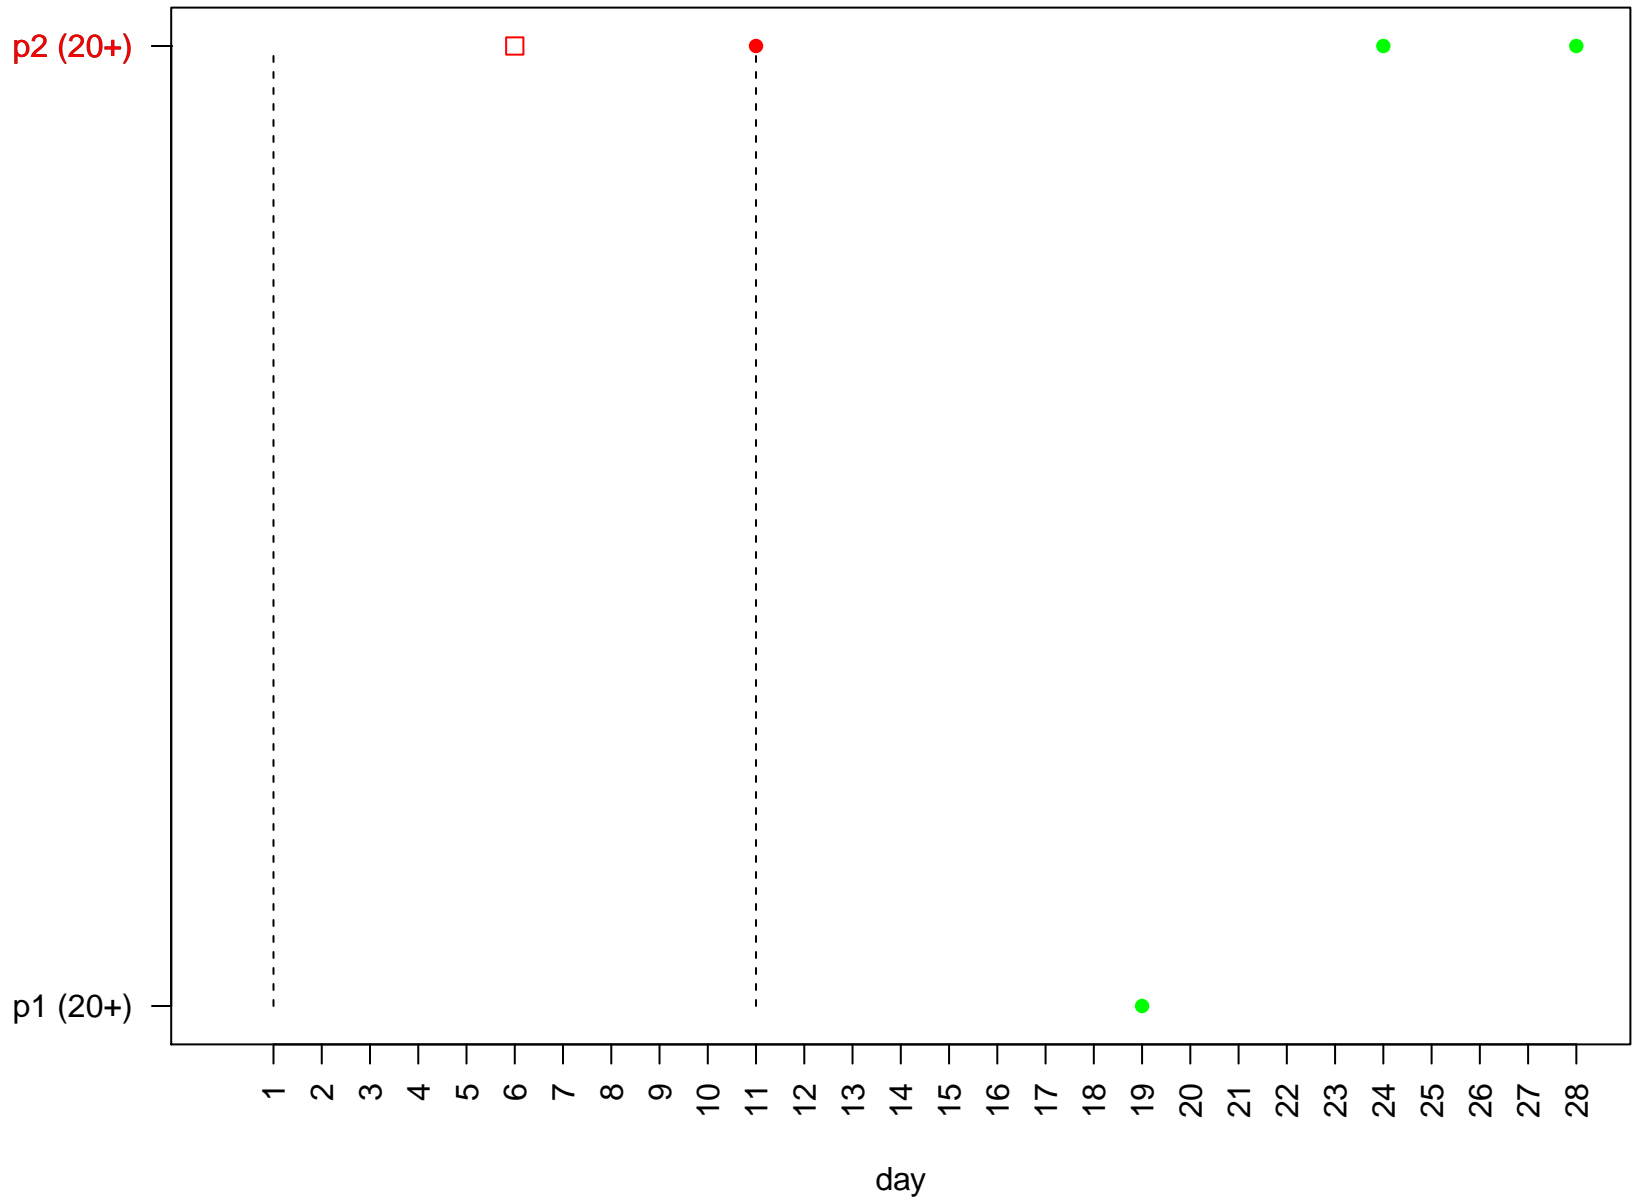

# Household 230

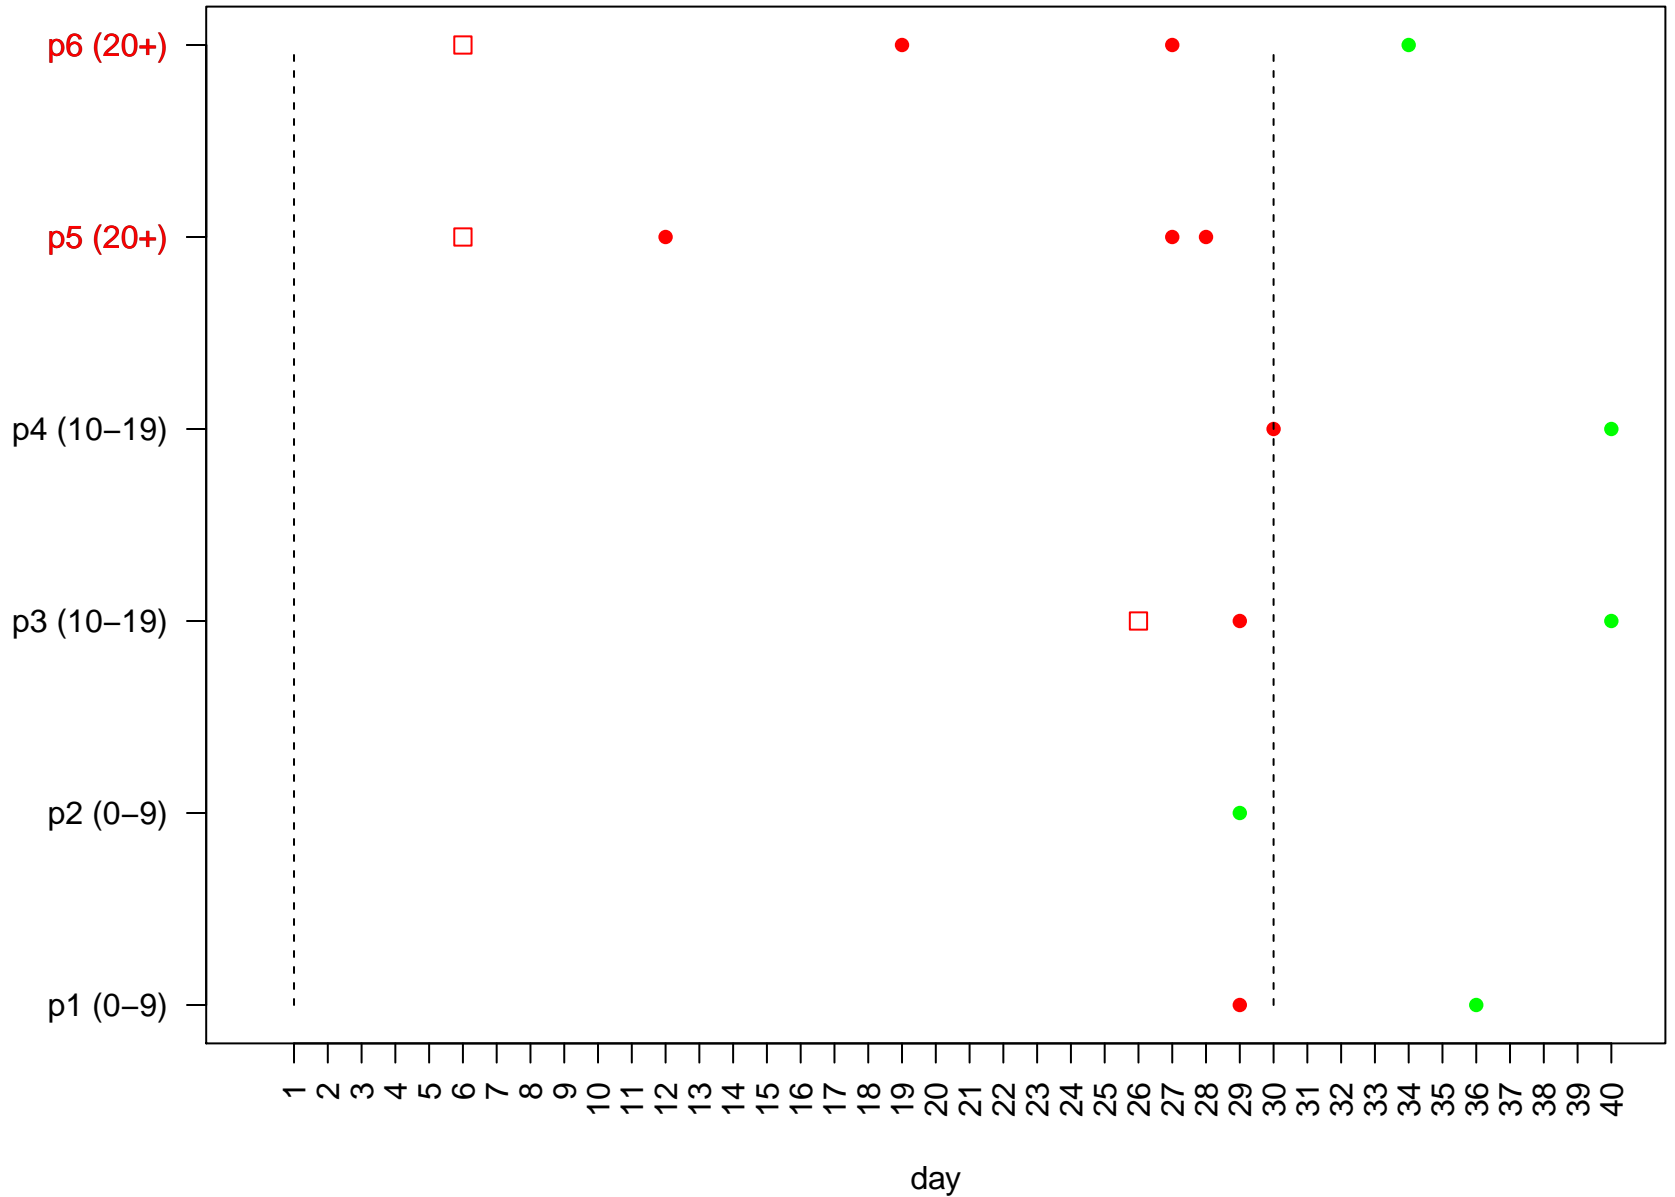



# Household 231

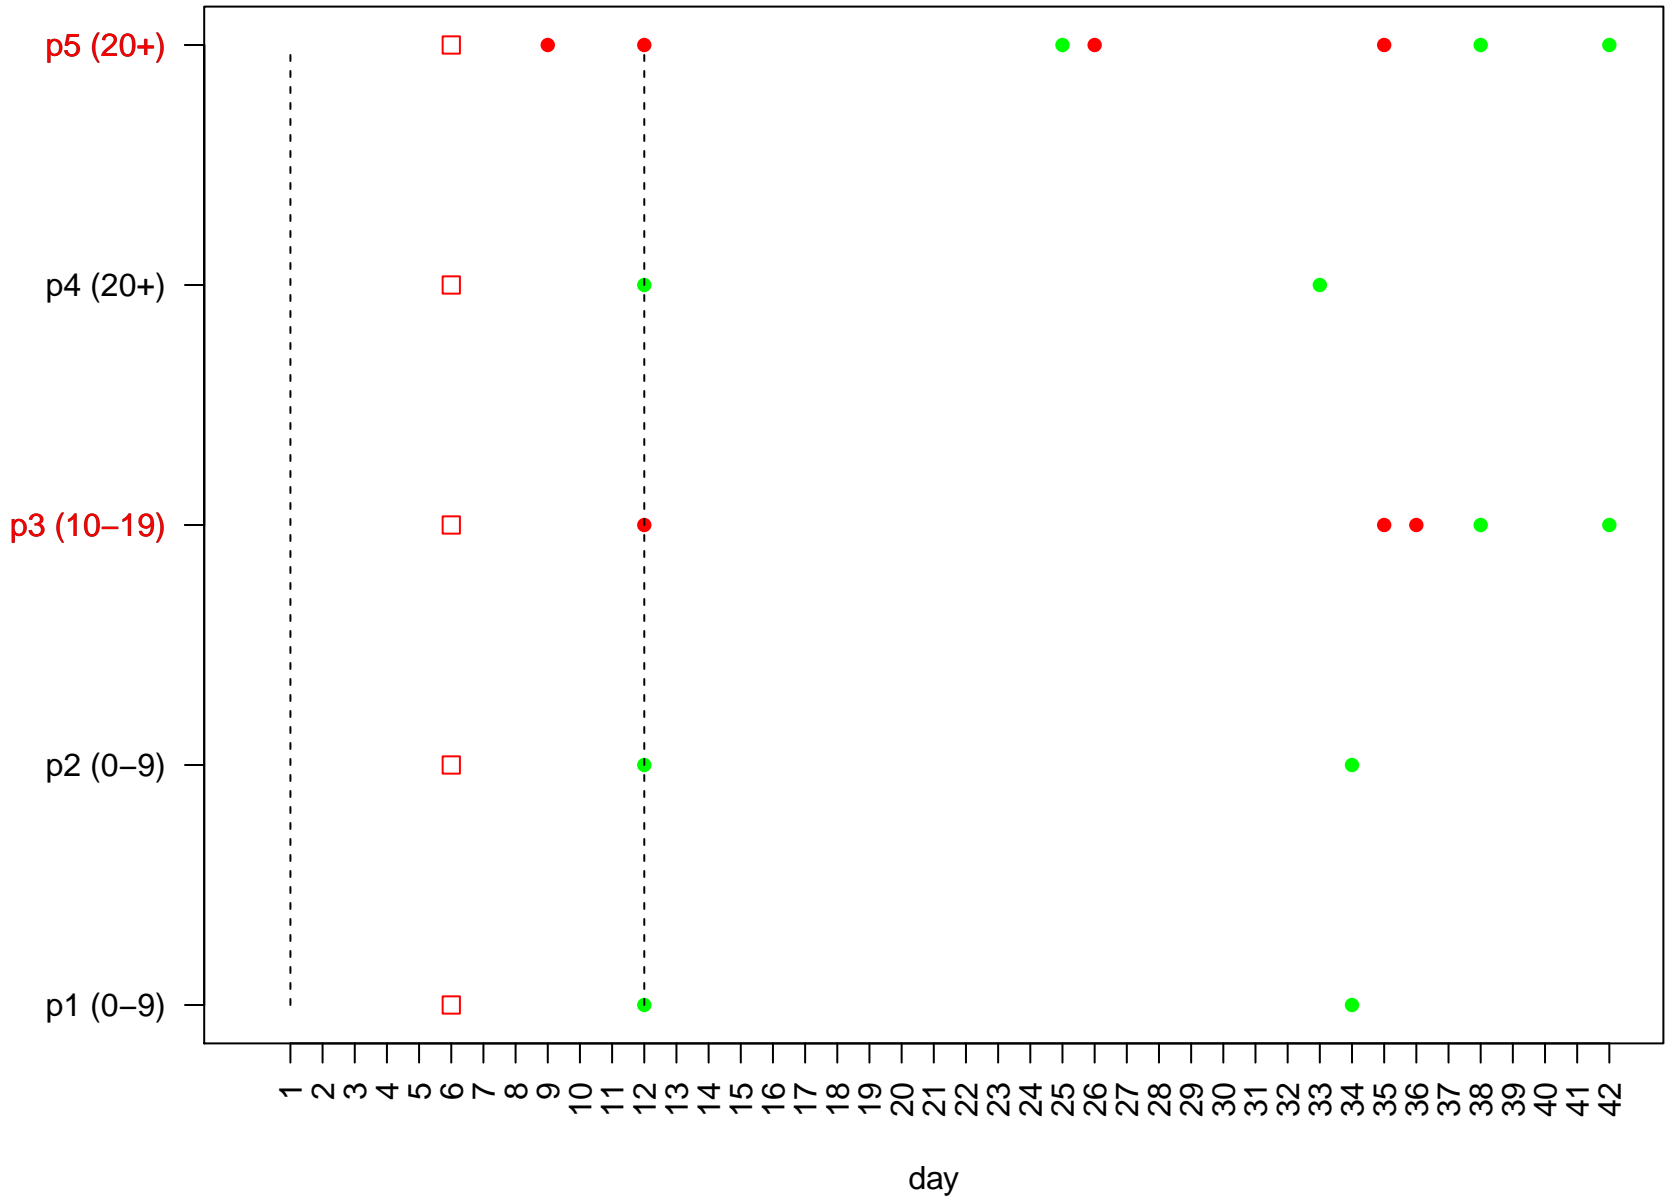

# Household 232

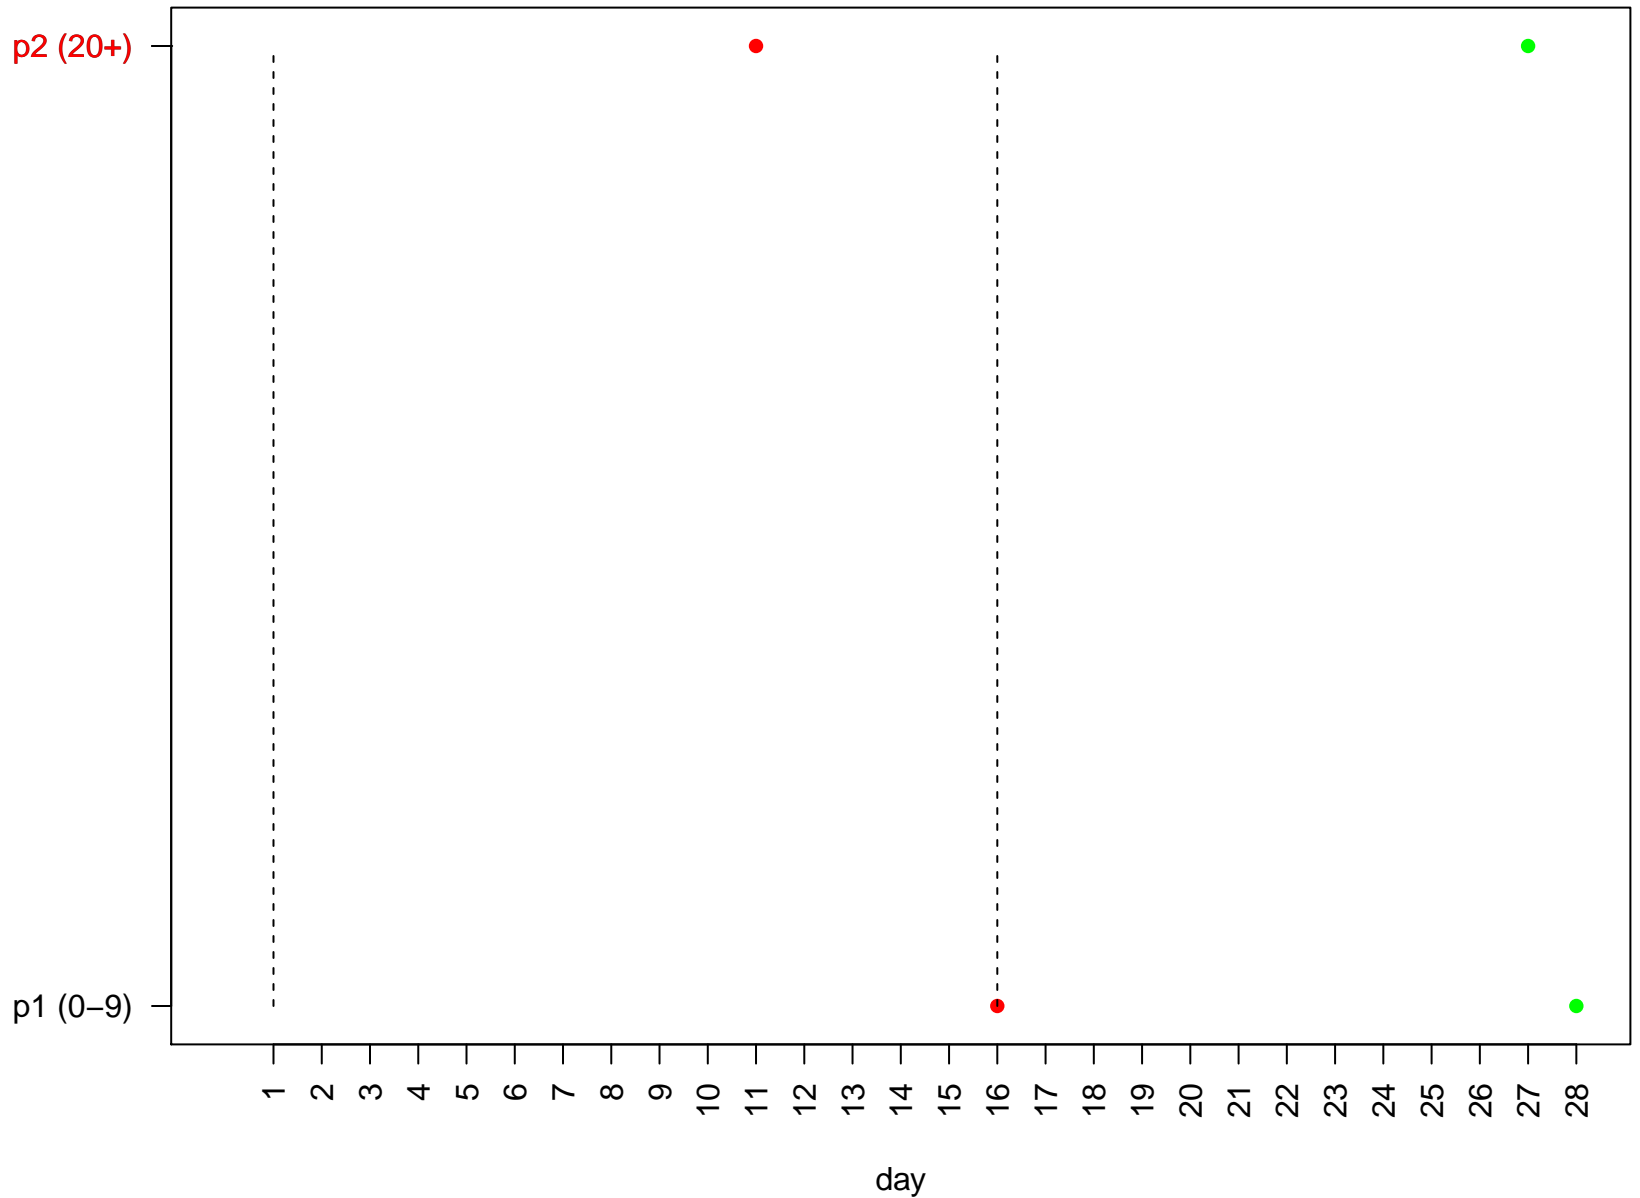

# Household 233

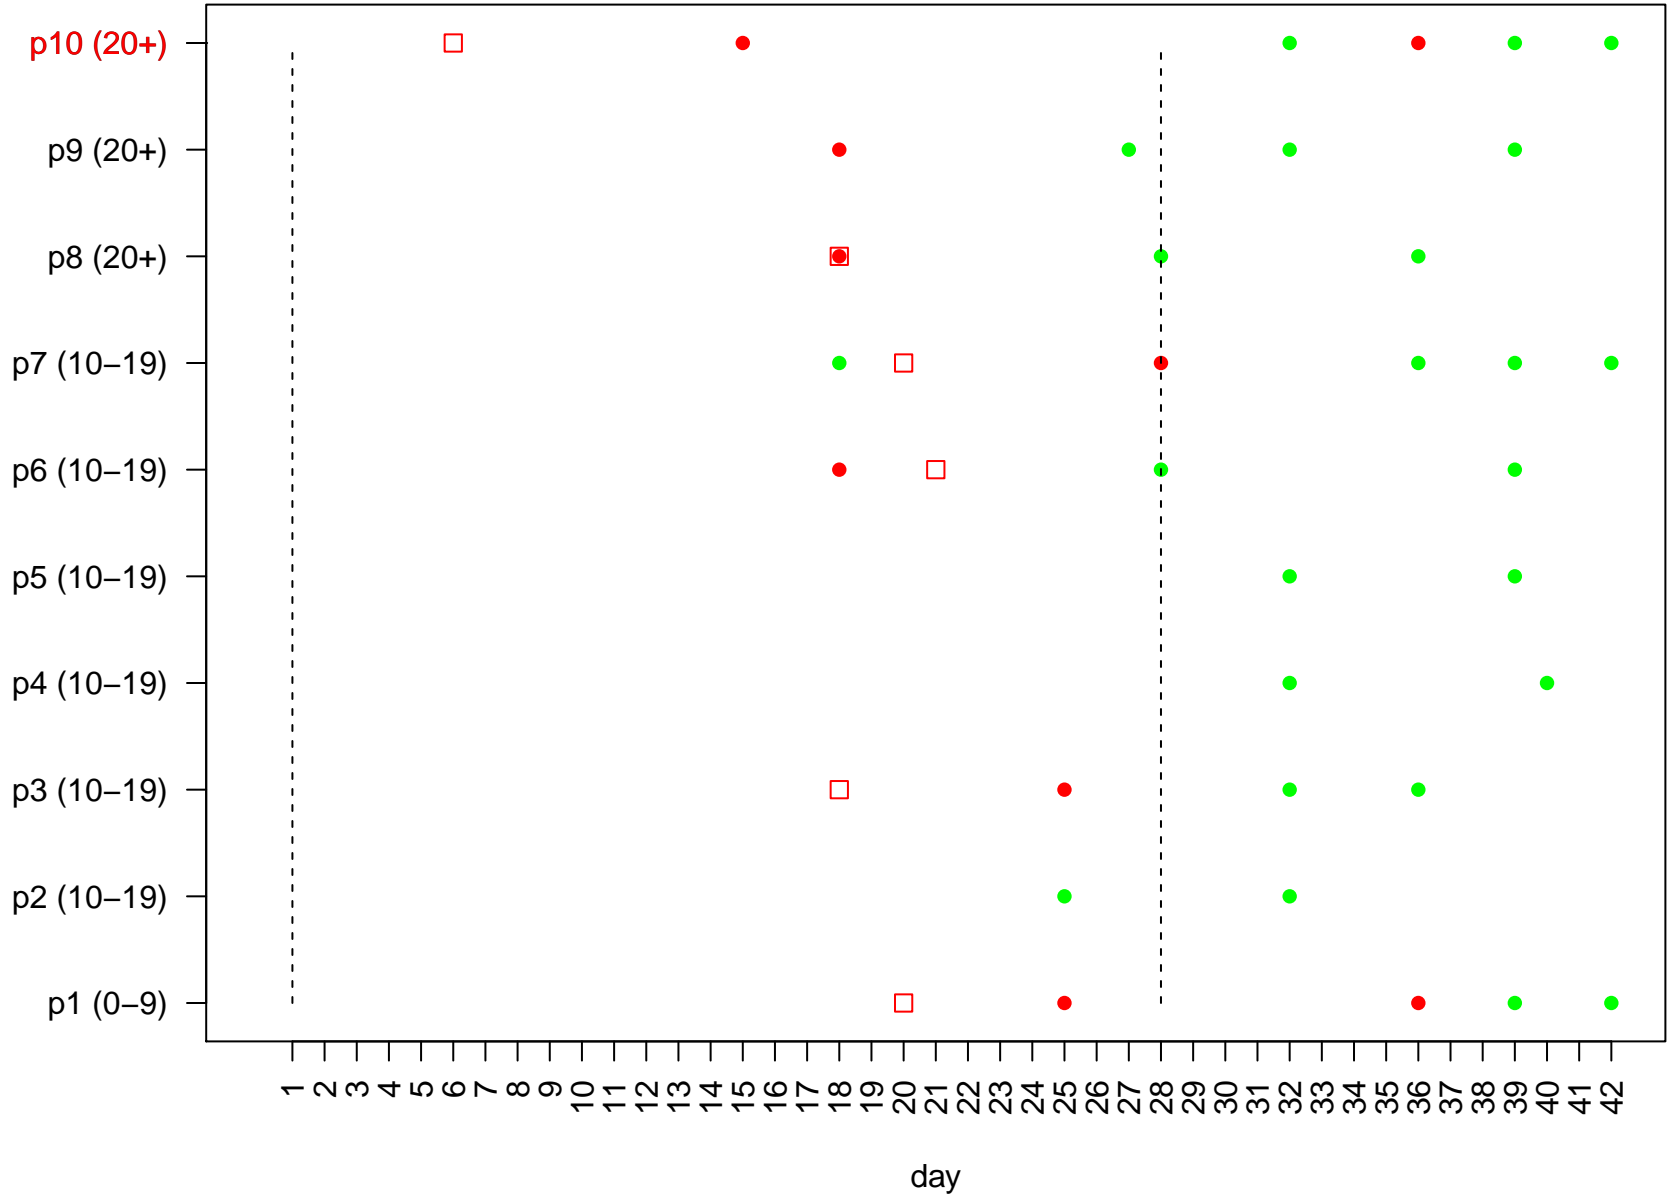

# Household 235

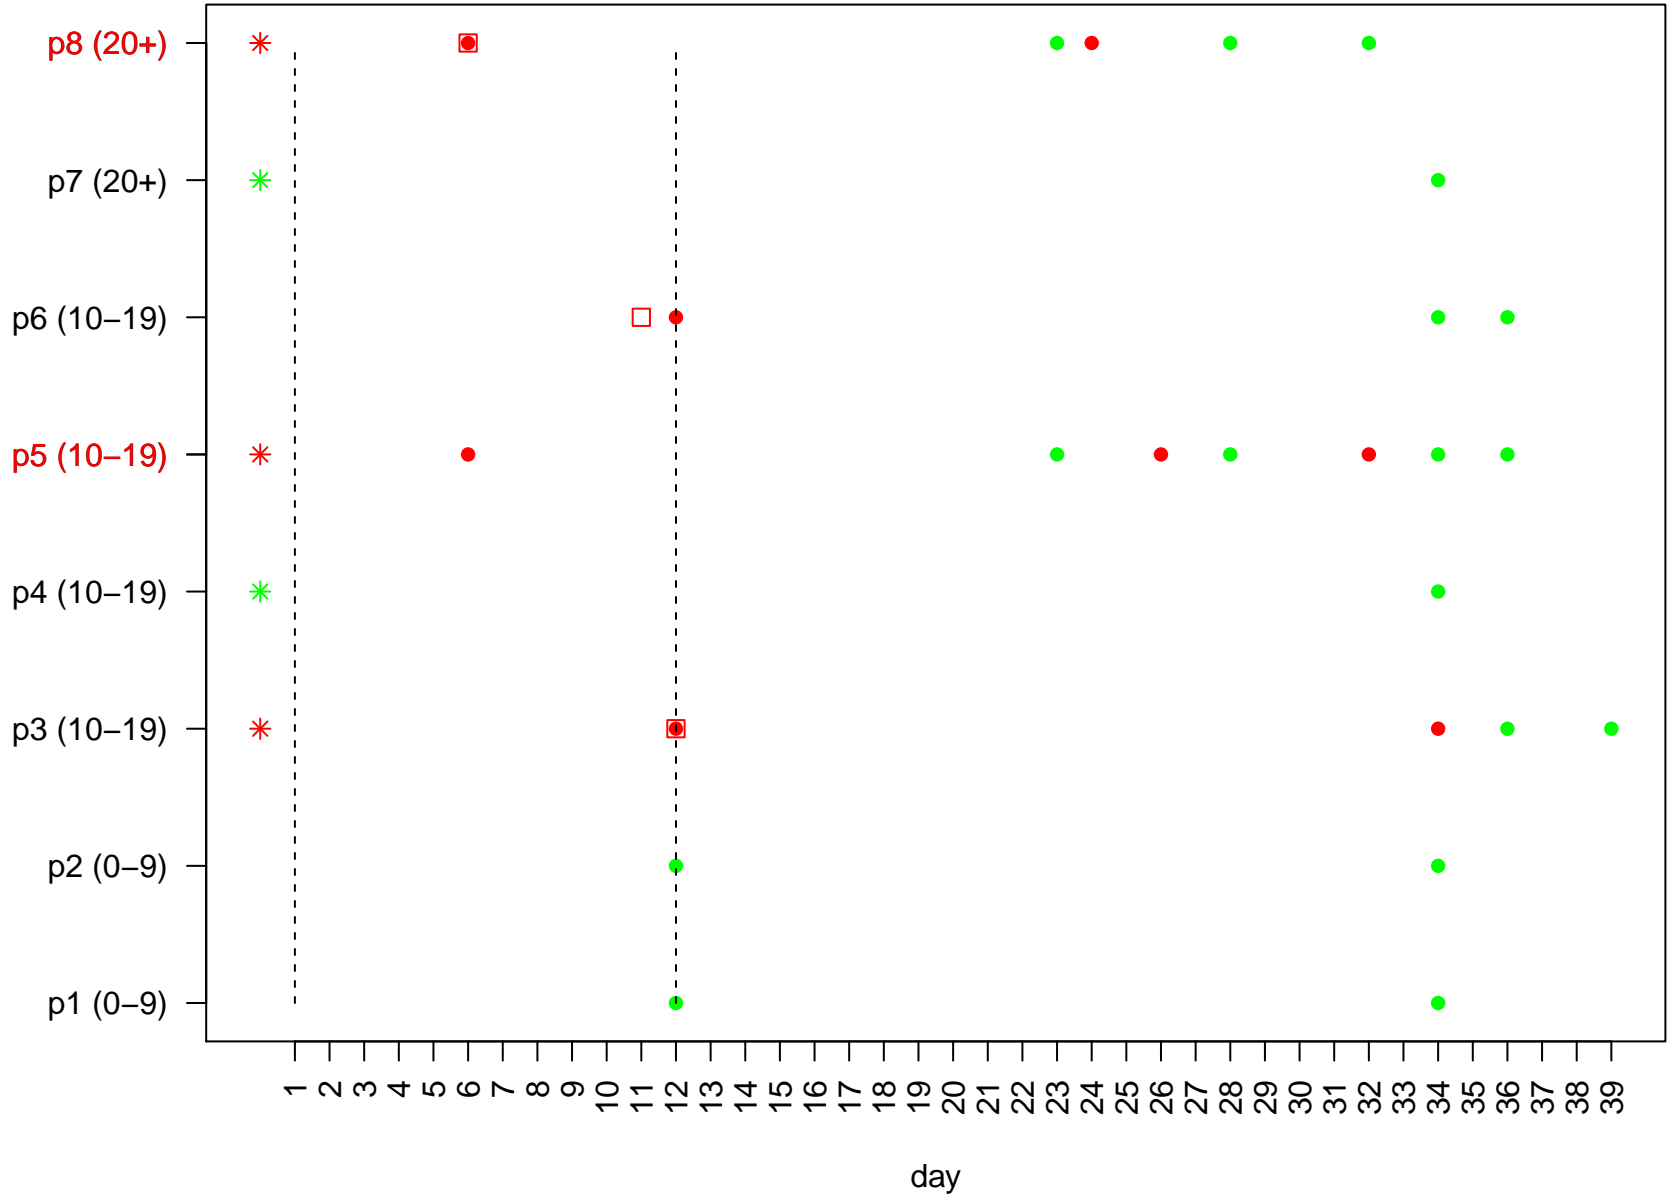

# Household 236

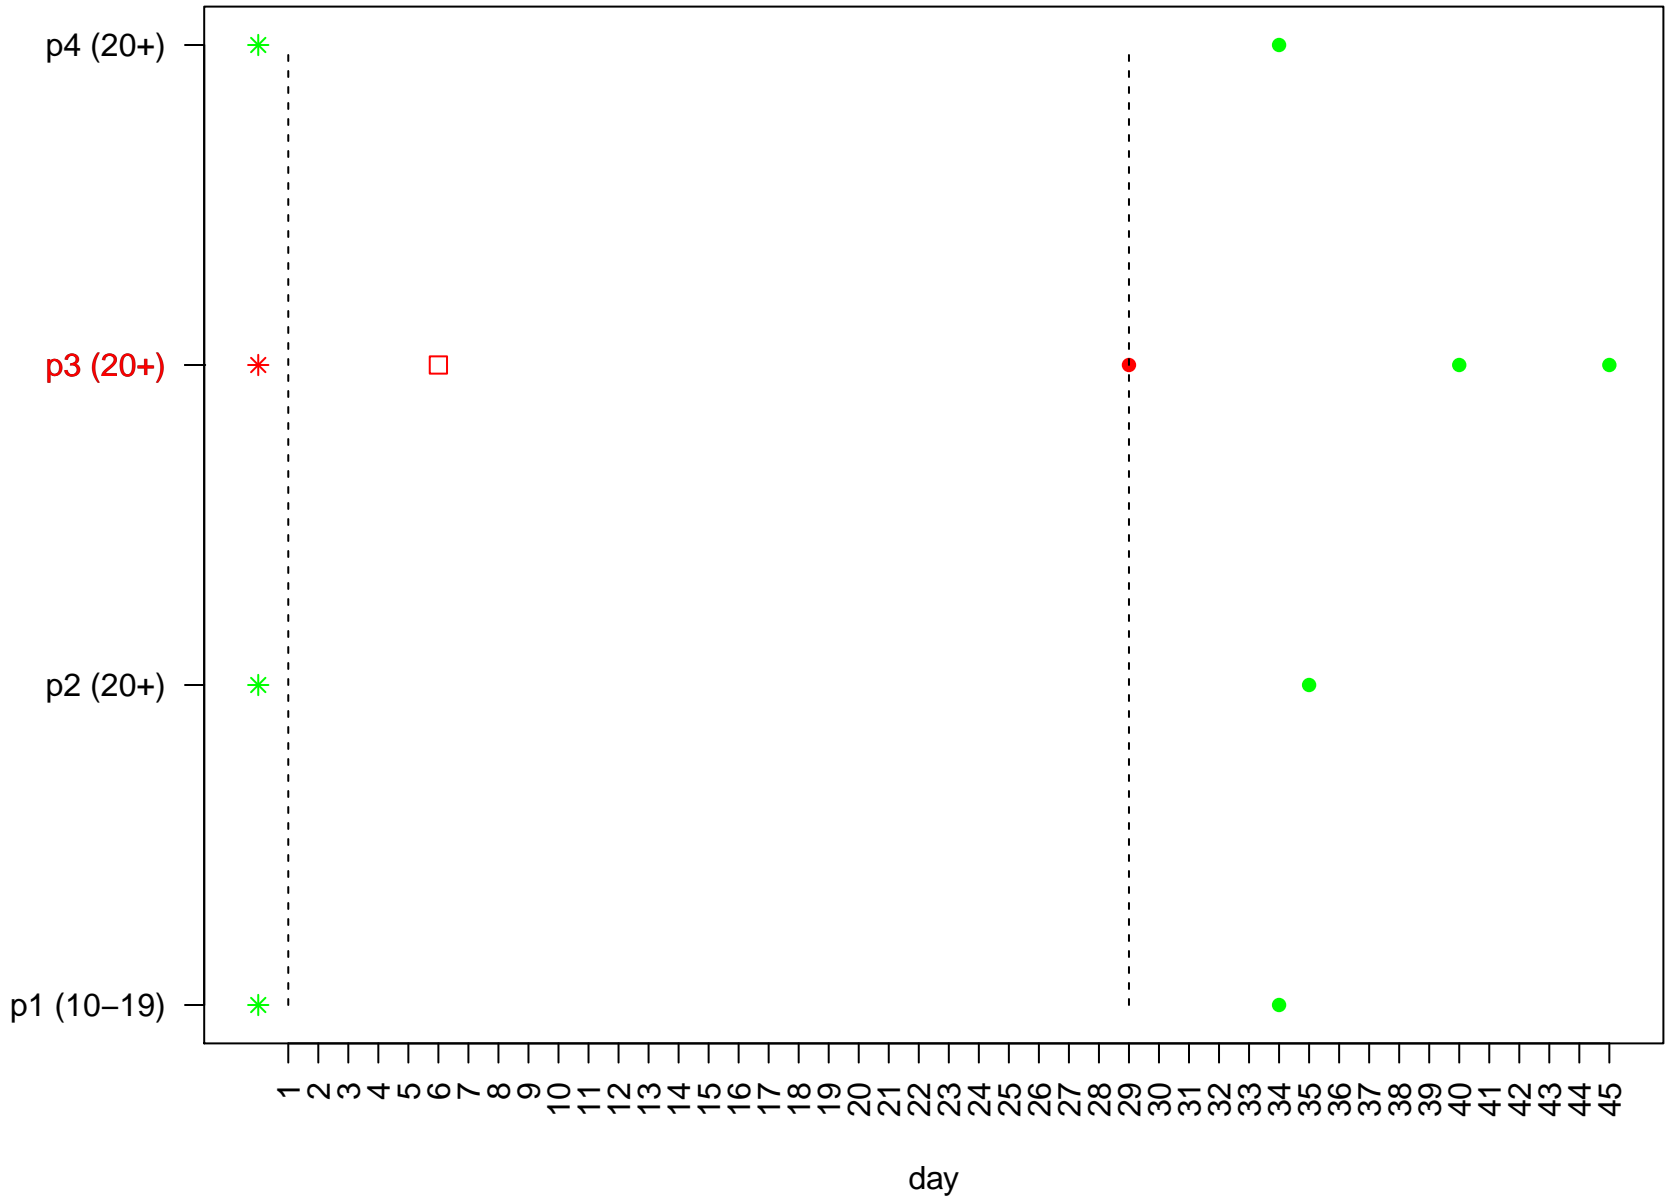

# Household 237

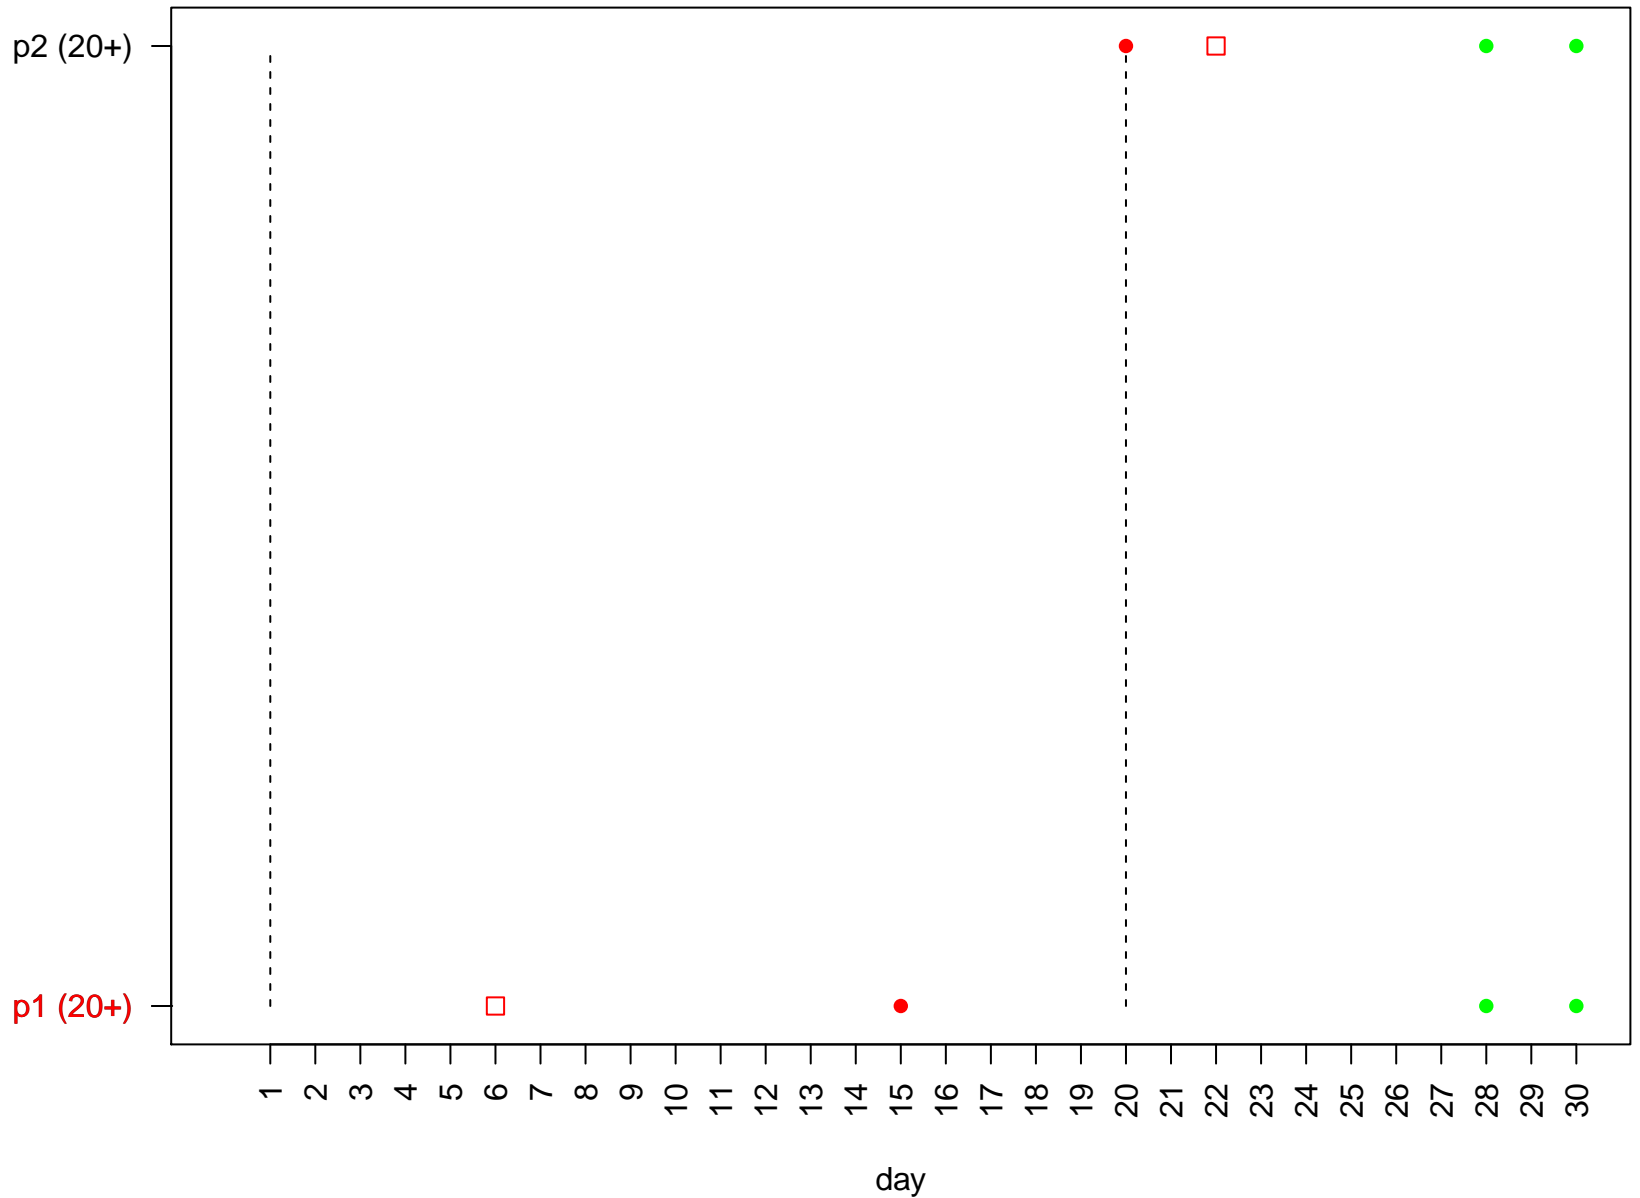

# Household 238

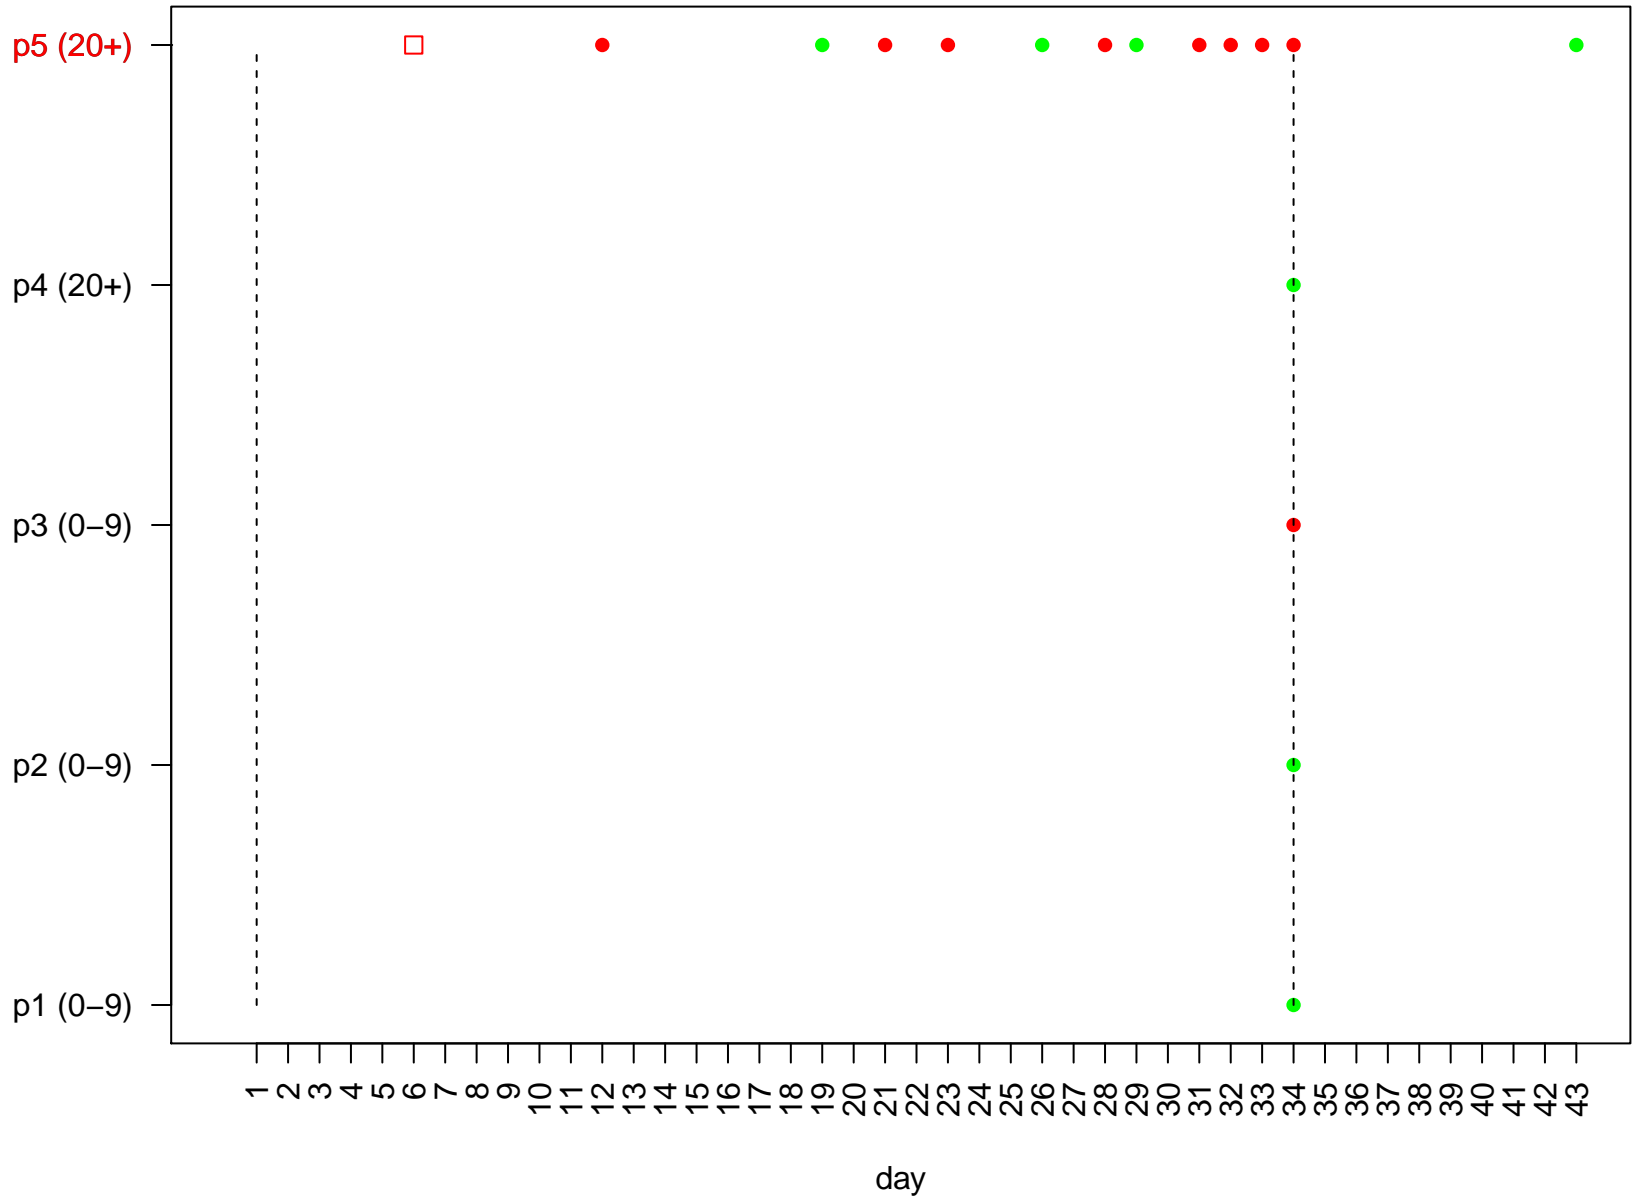

# Household 239

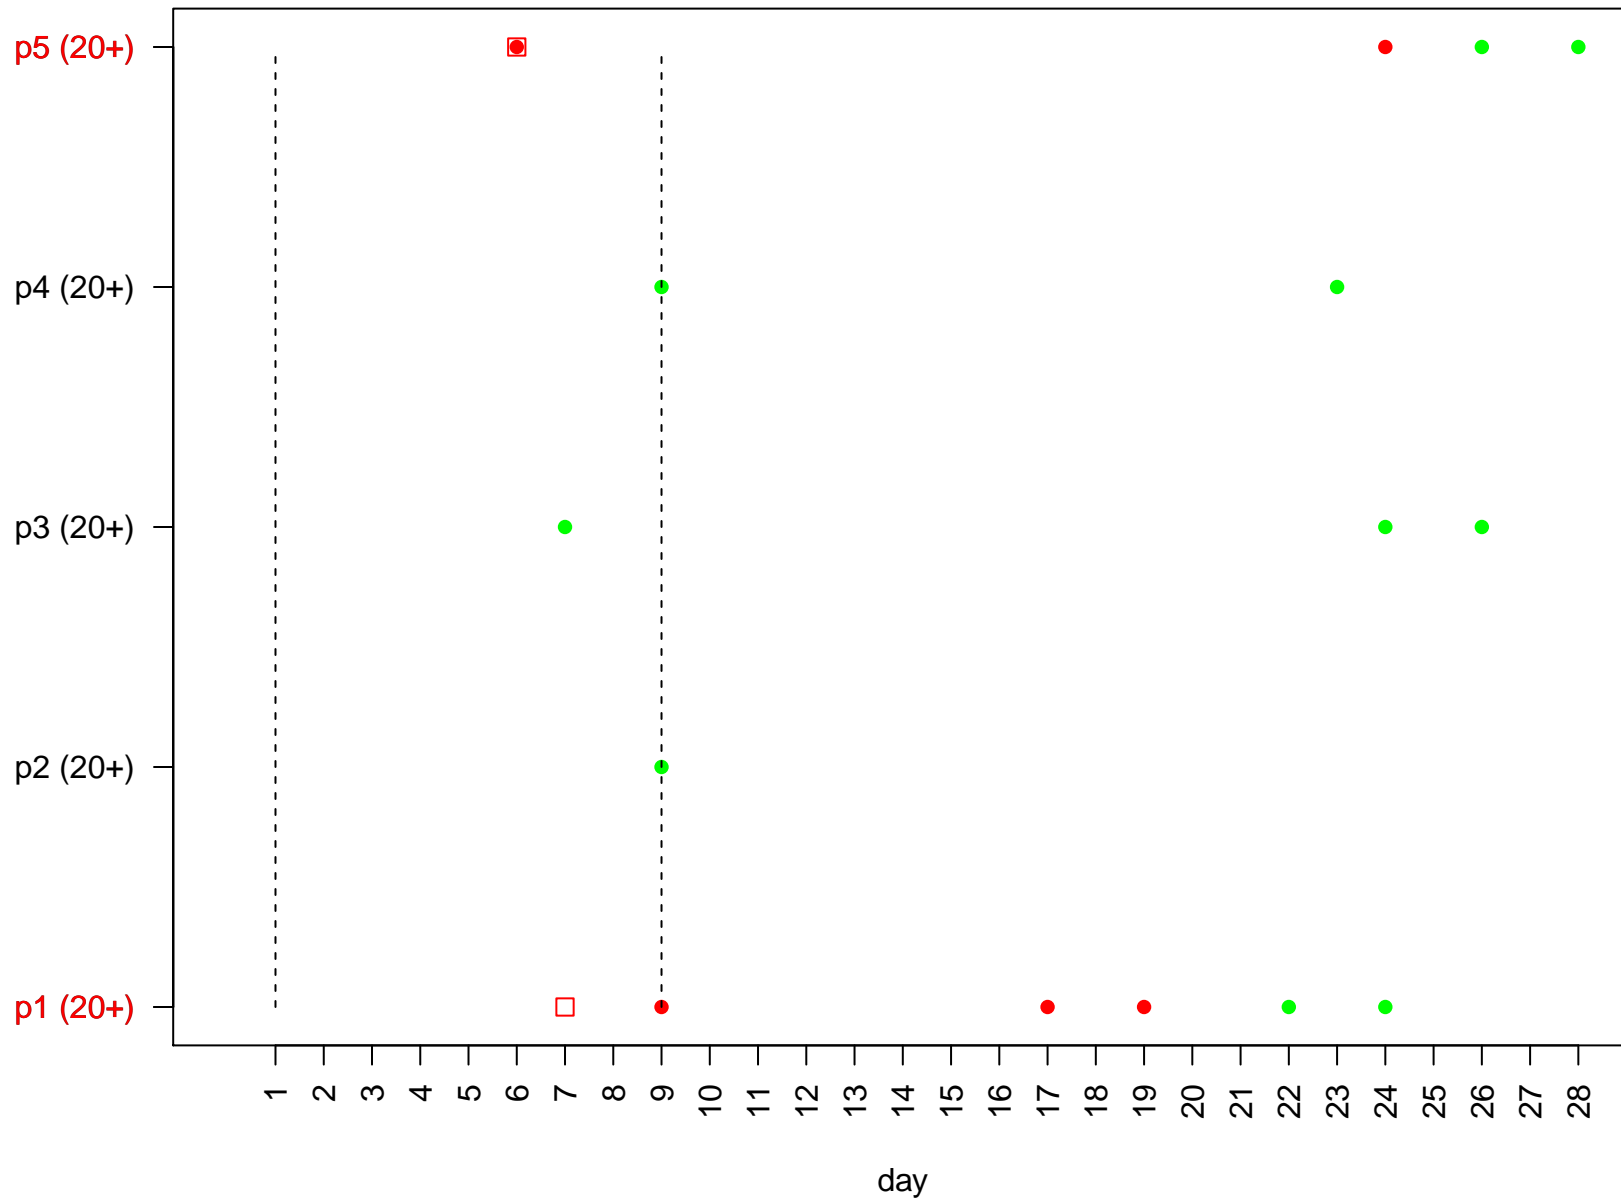



# Household 240

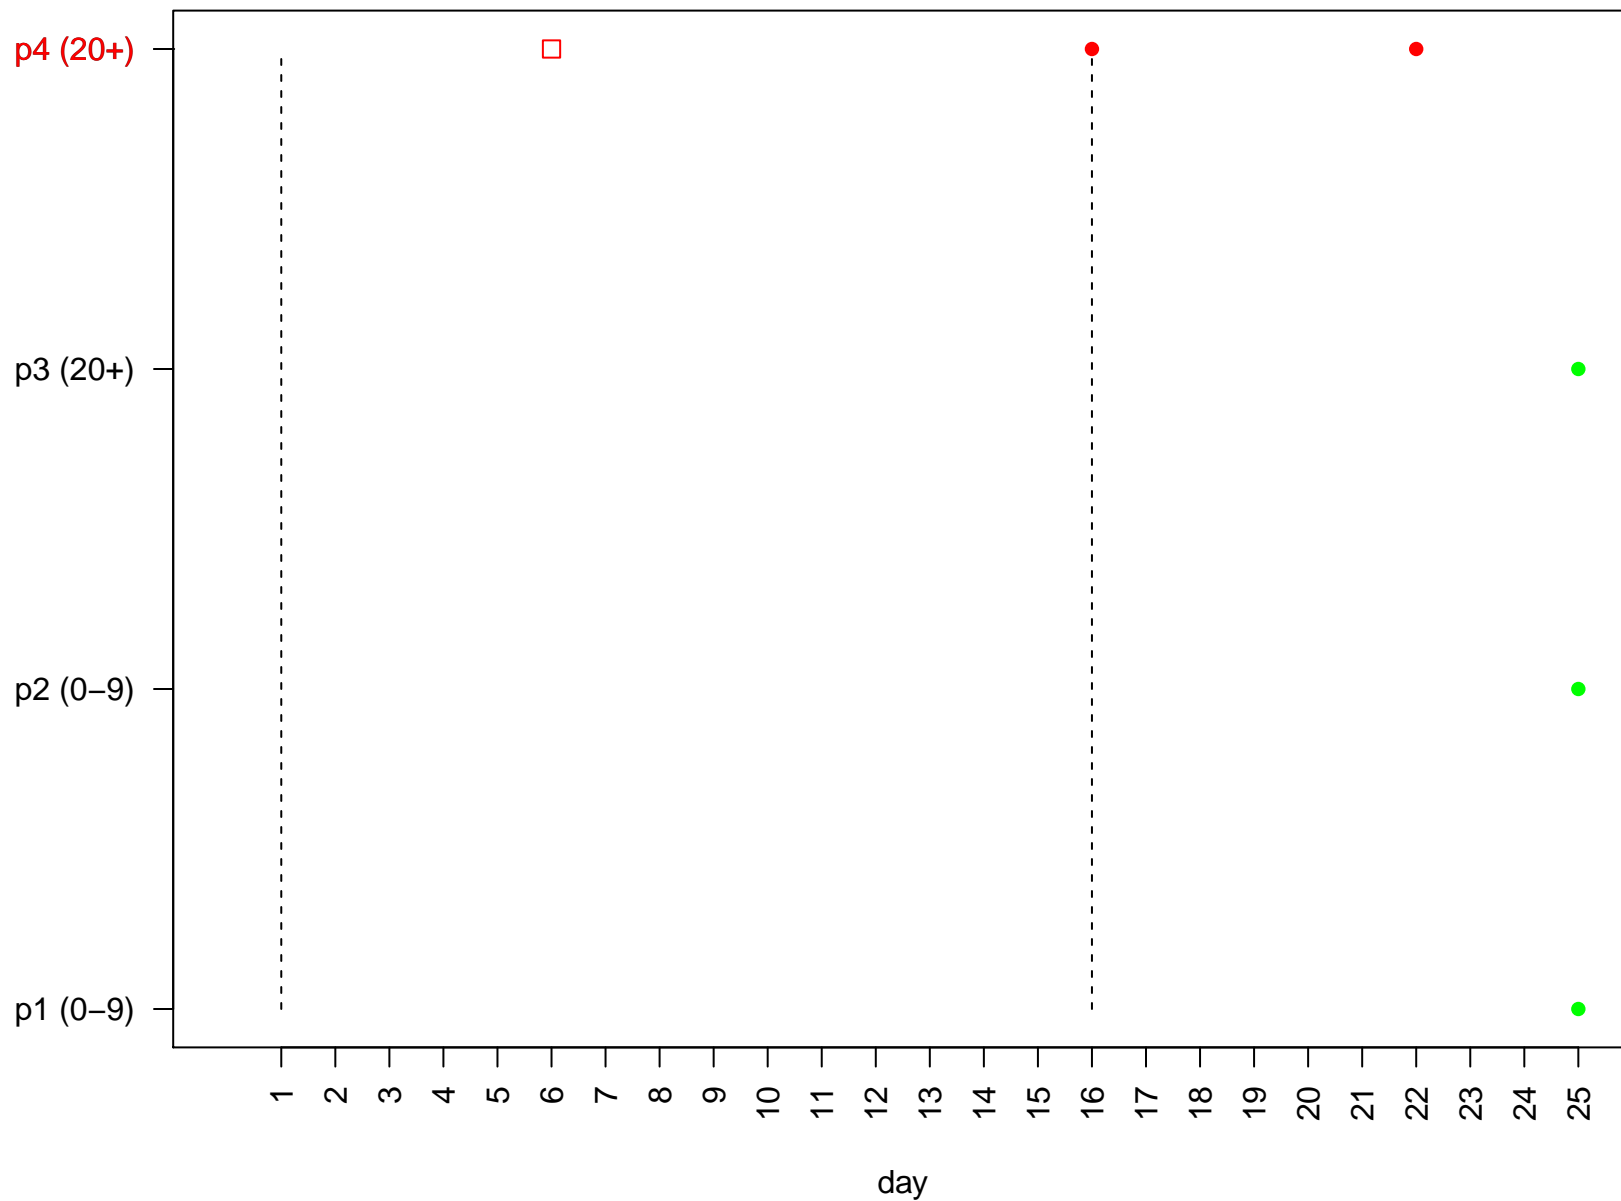

# Household 241

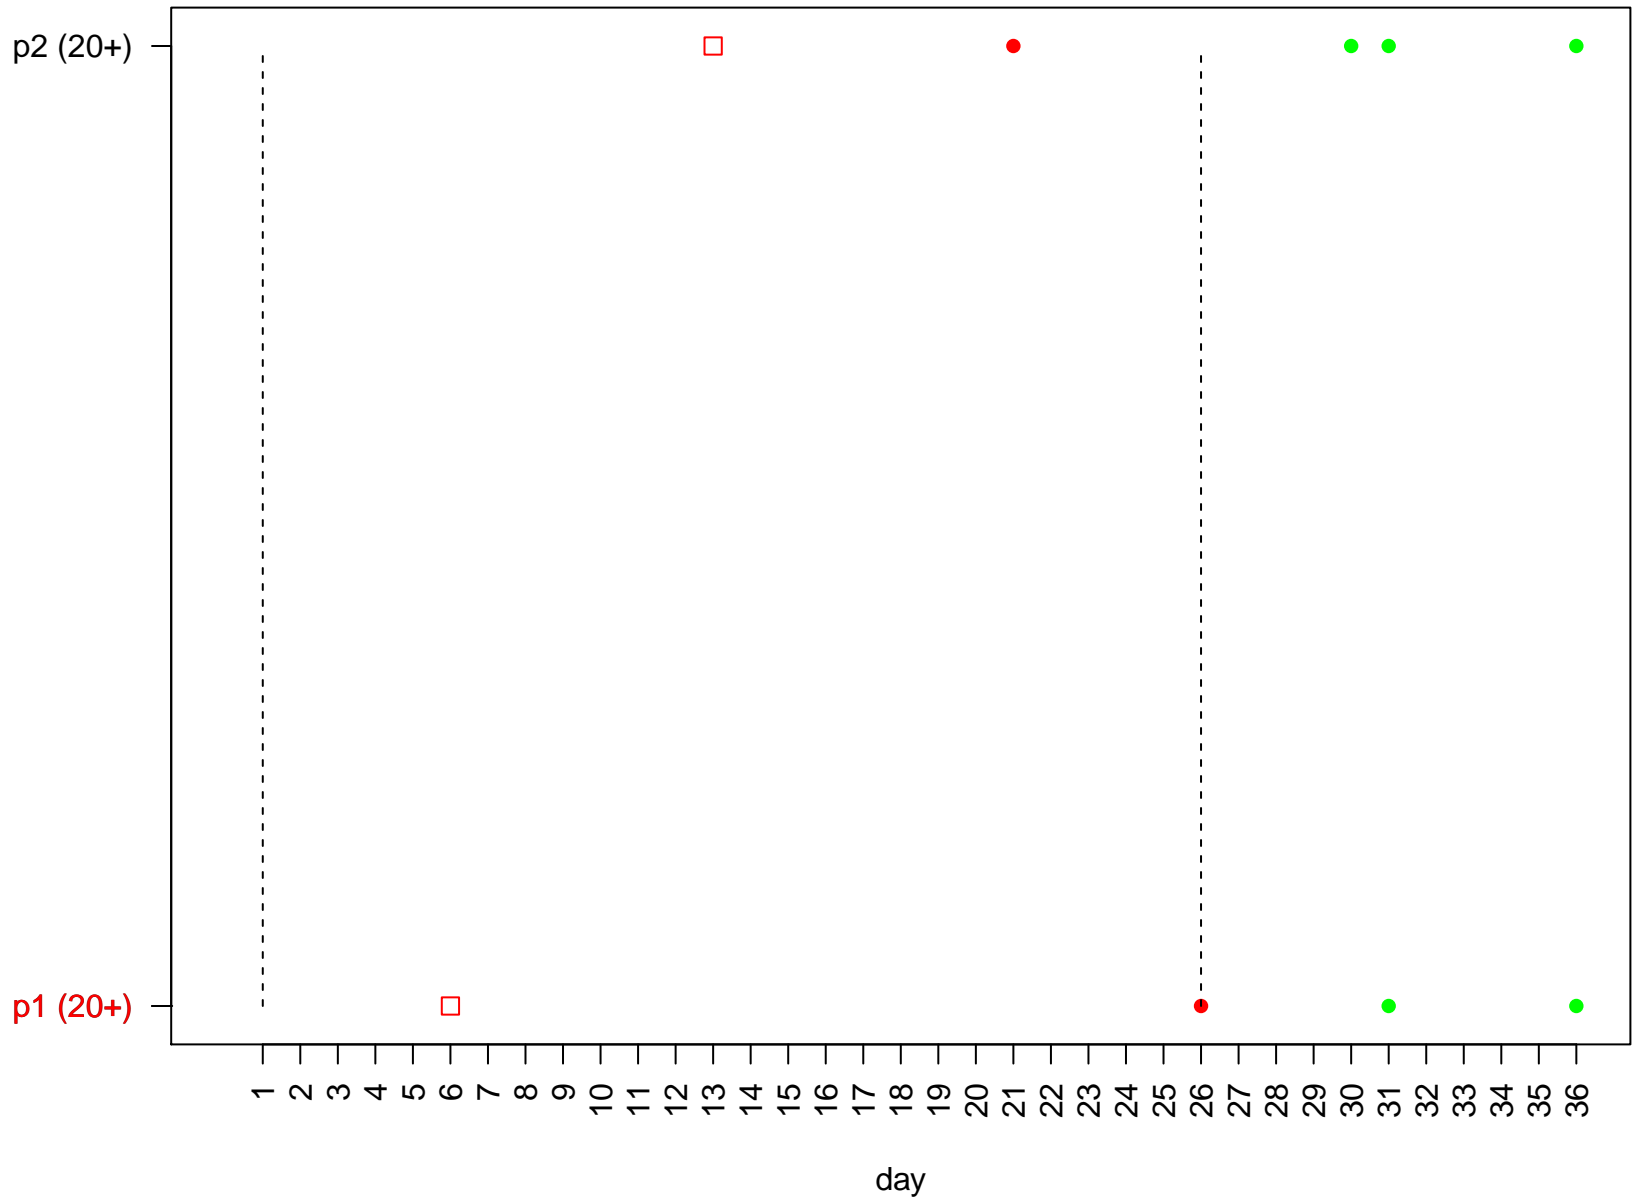

# Household 242

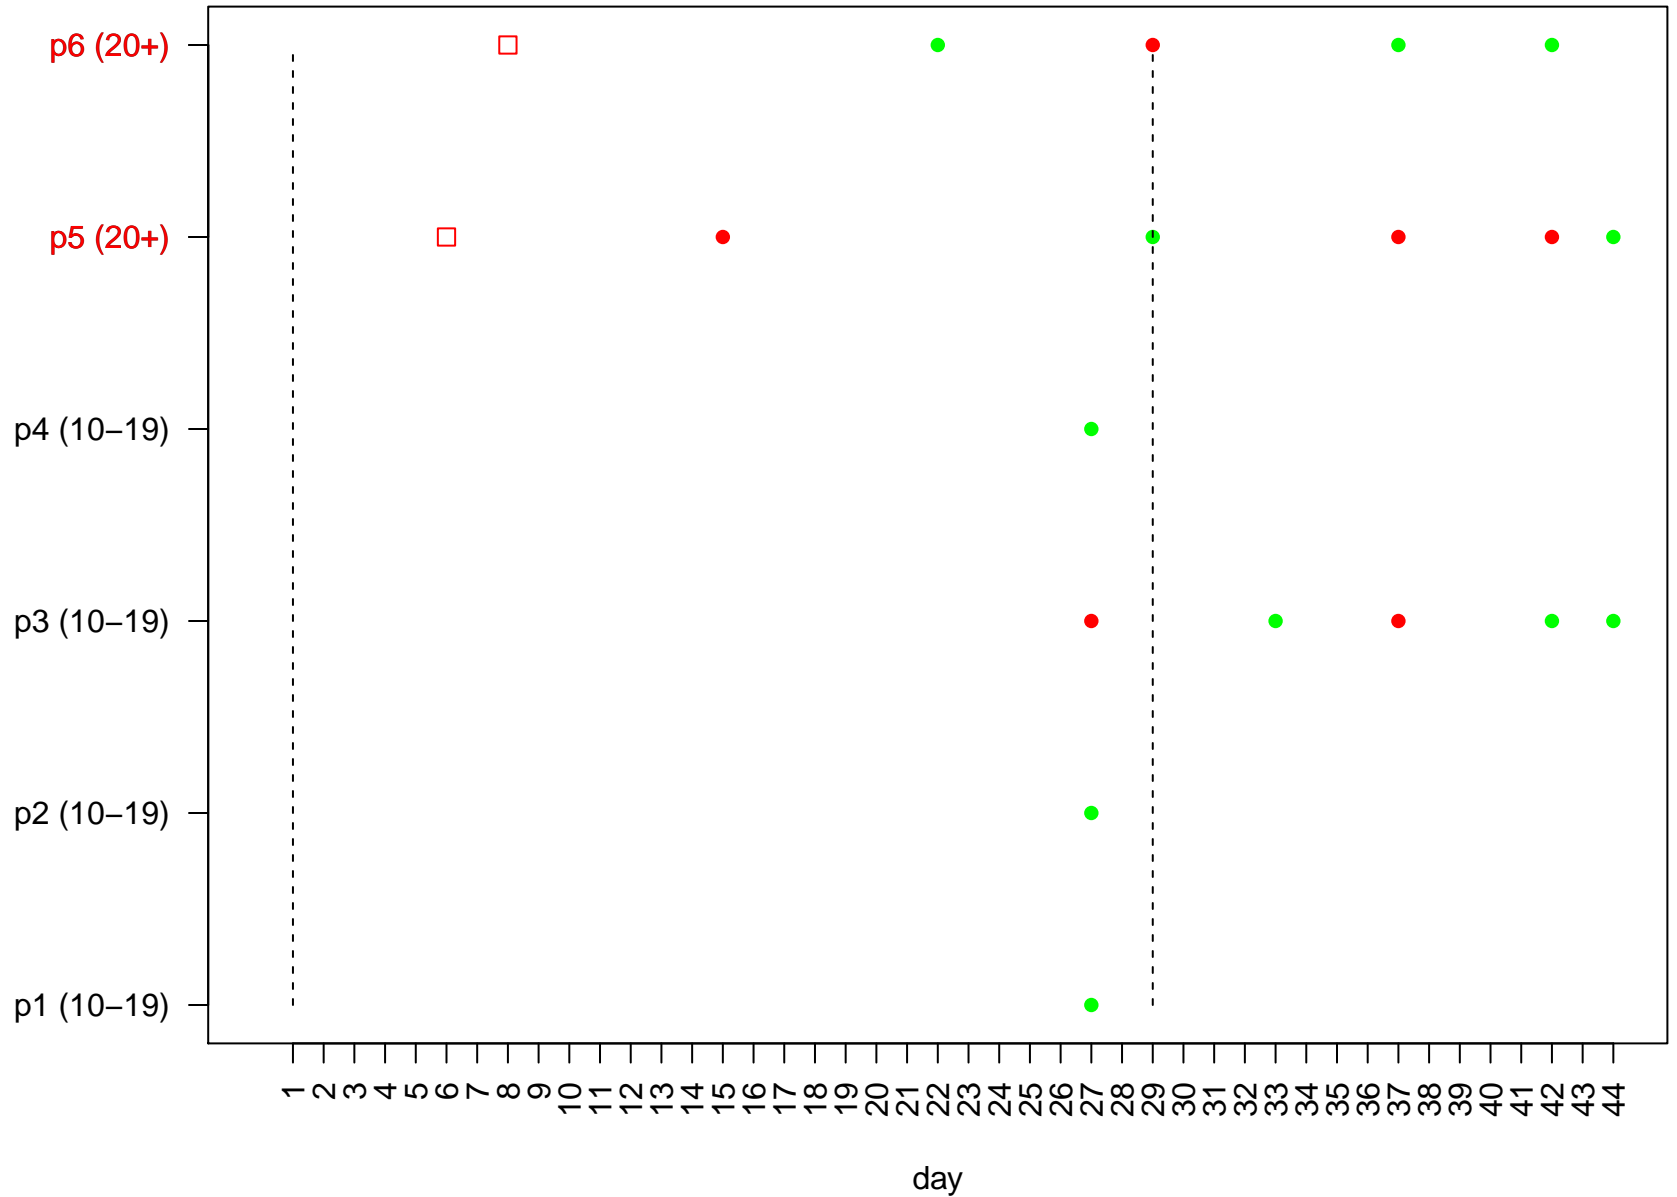

# Household 244

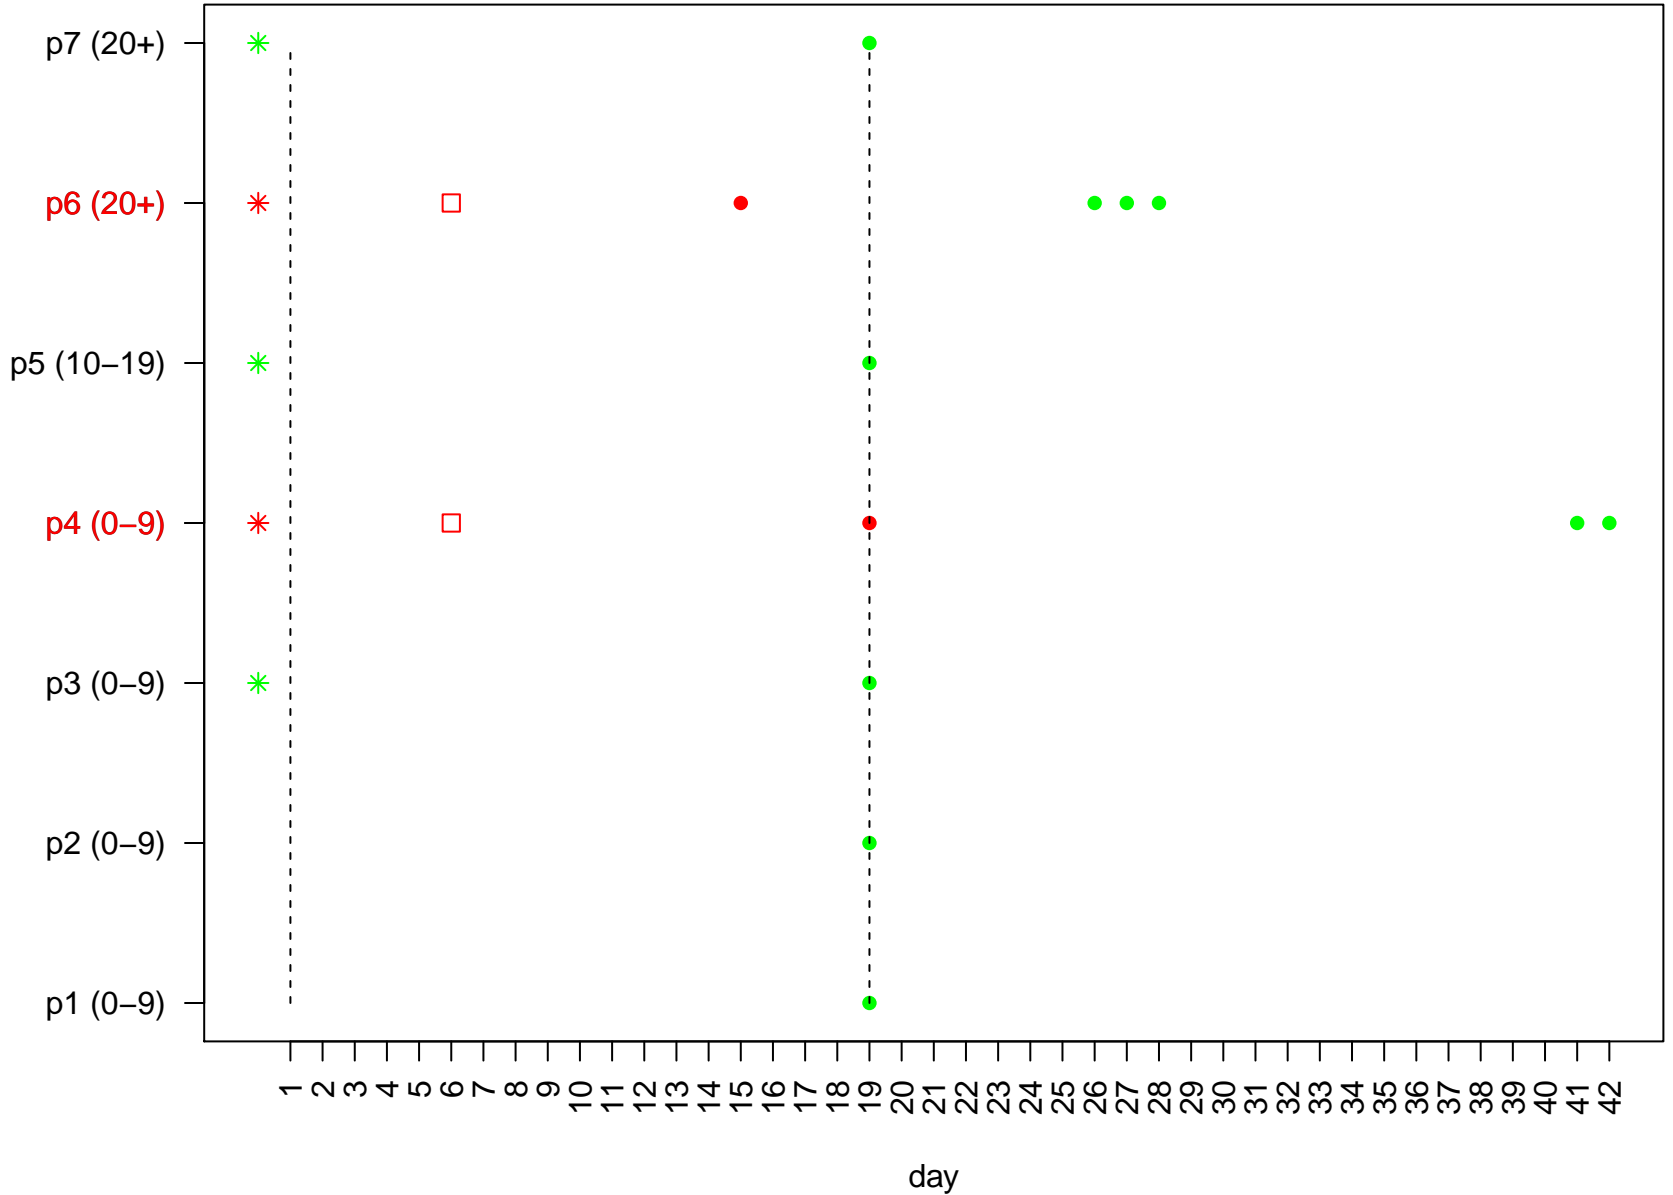

# Household 245

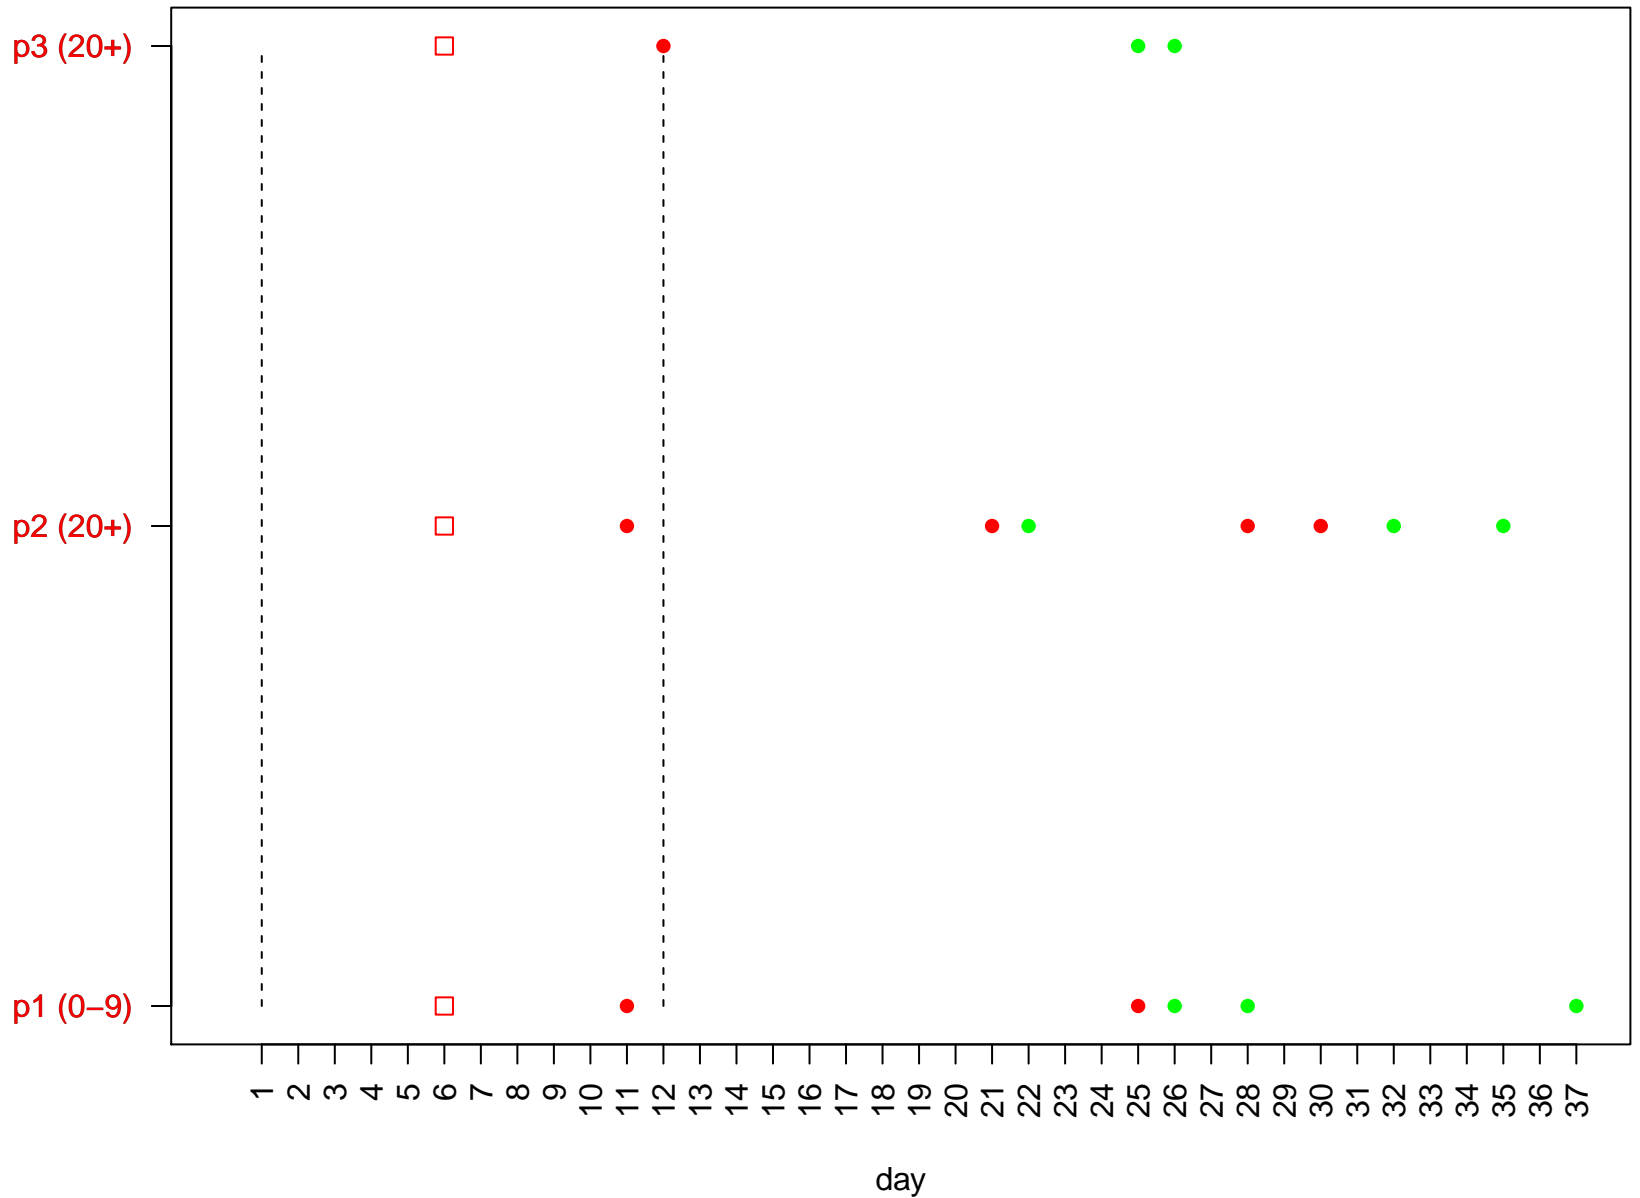

# Household 246

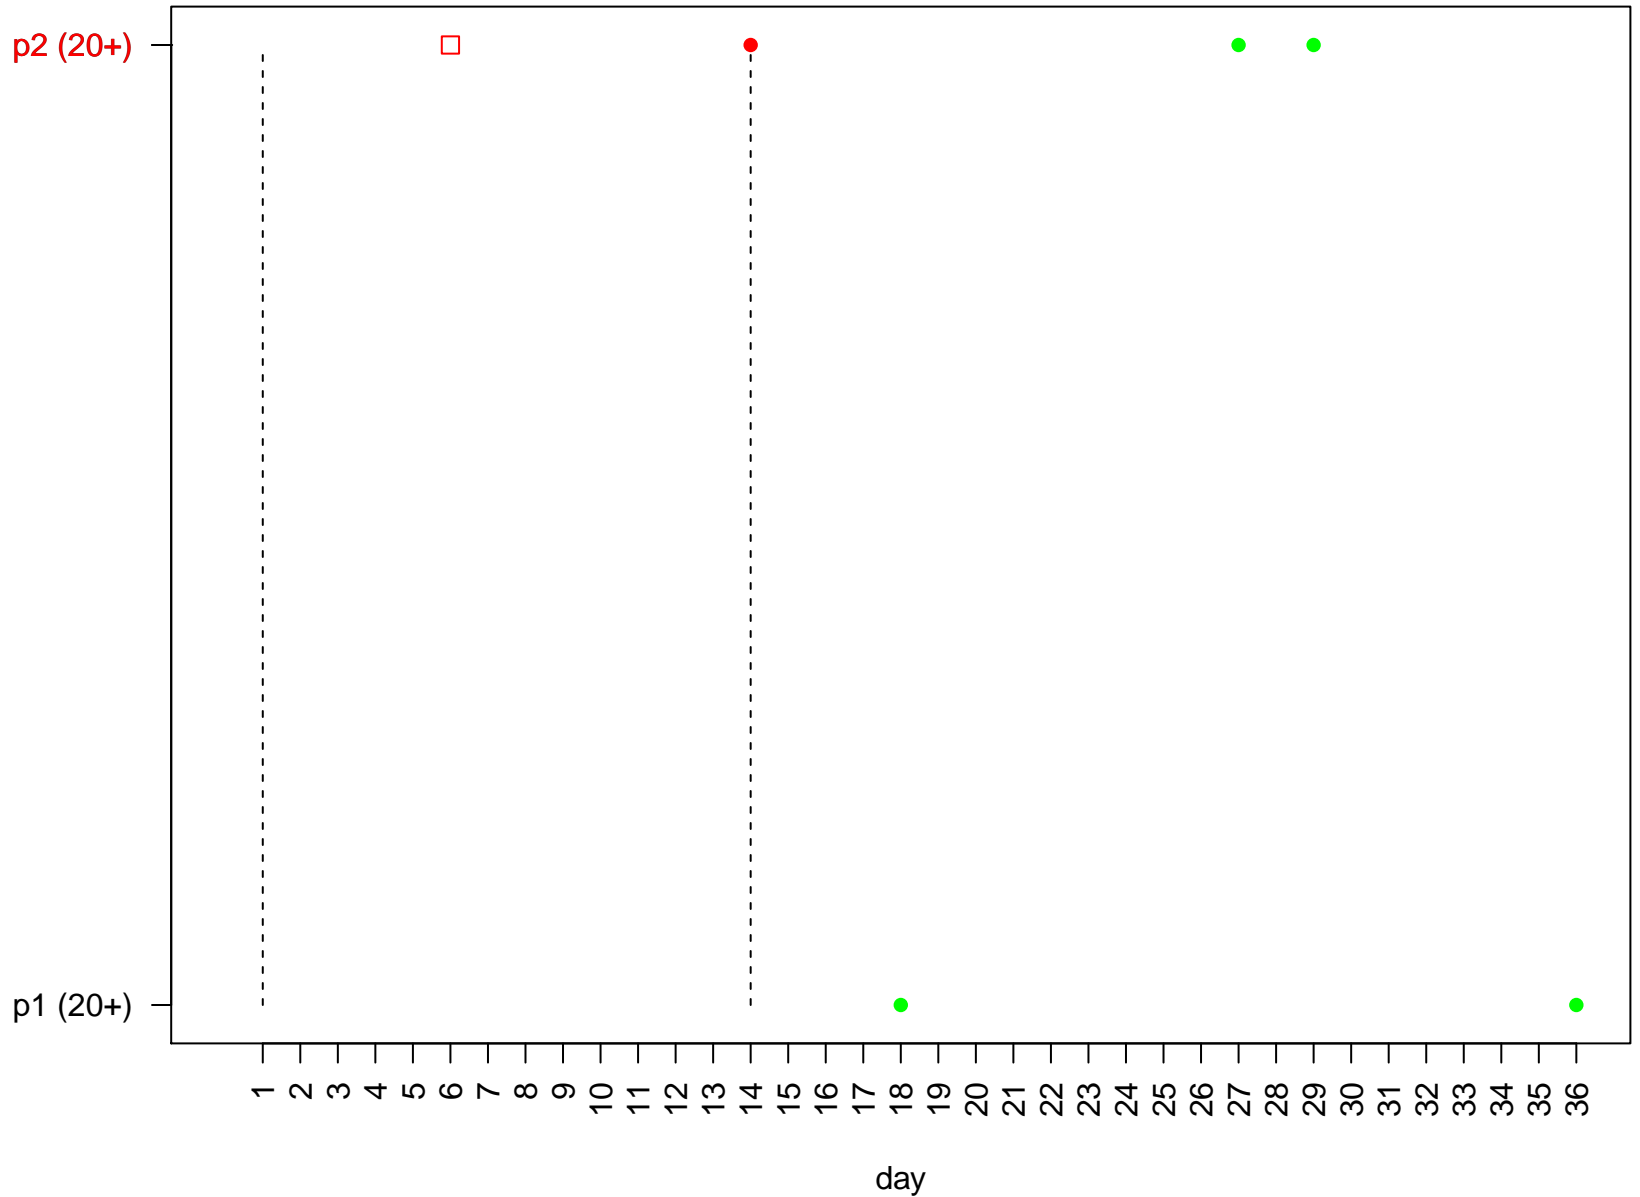

# Household 247

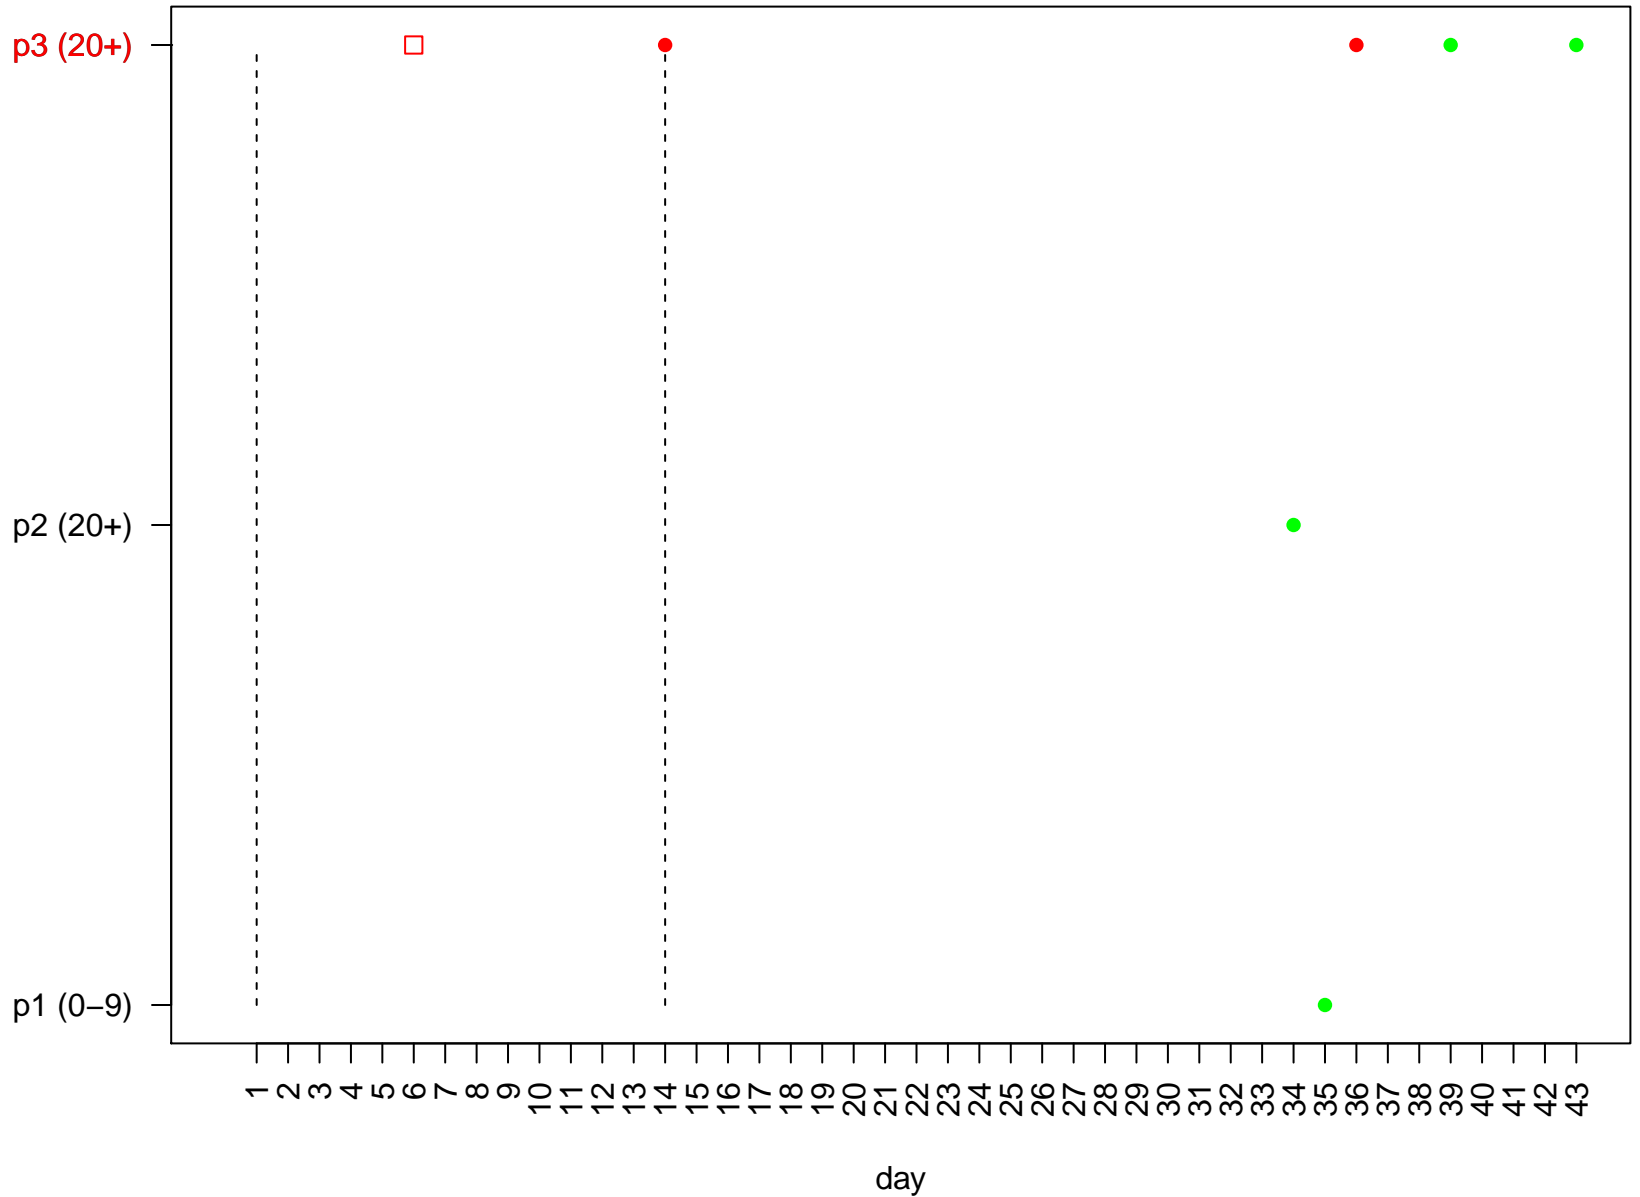

# Household 248

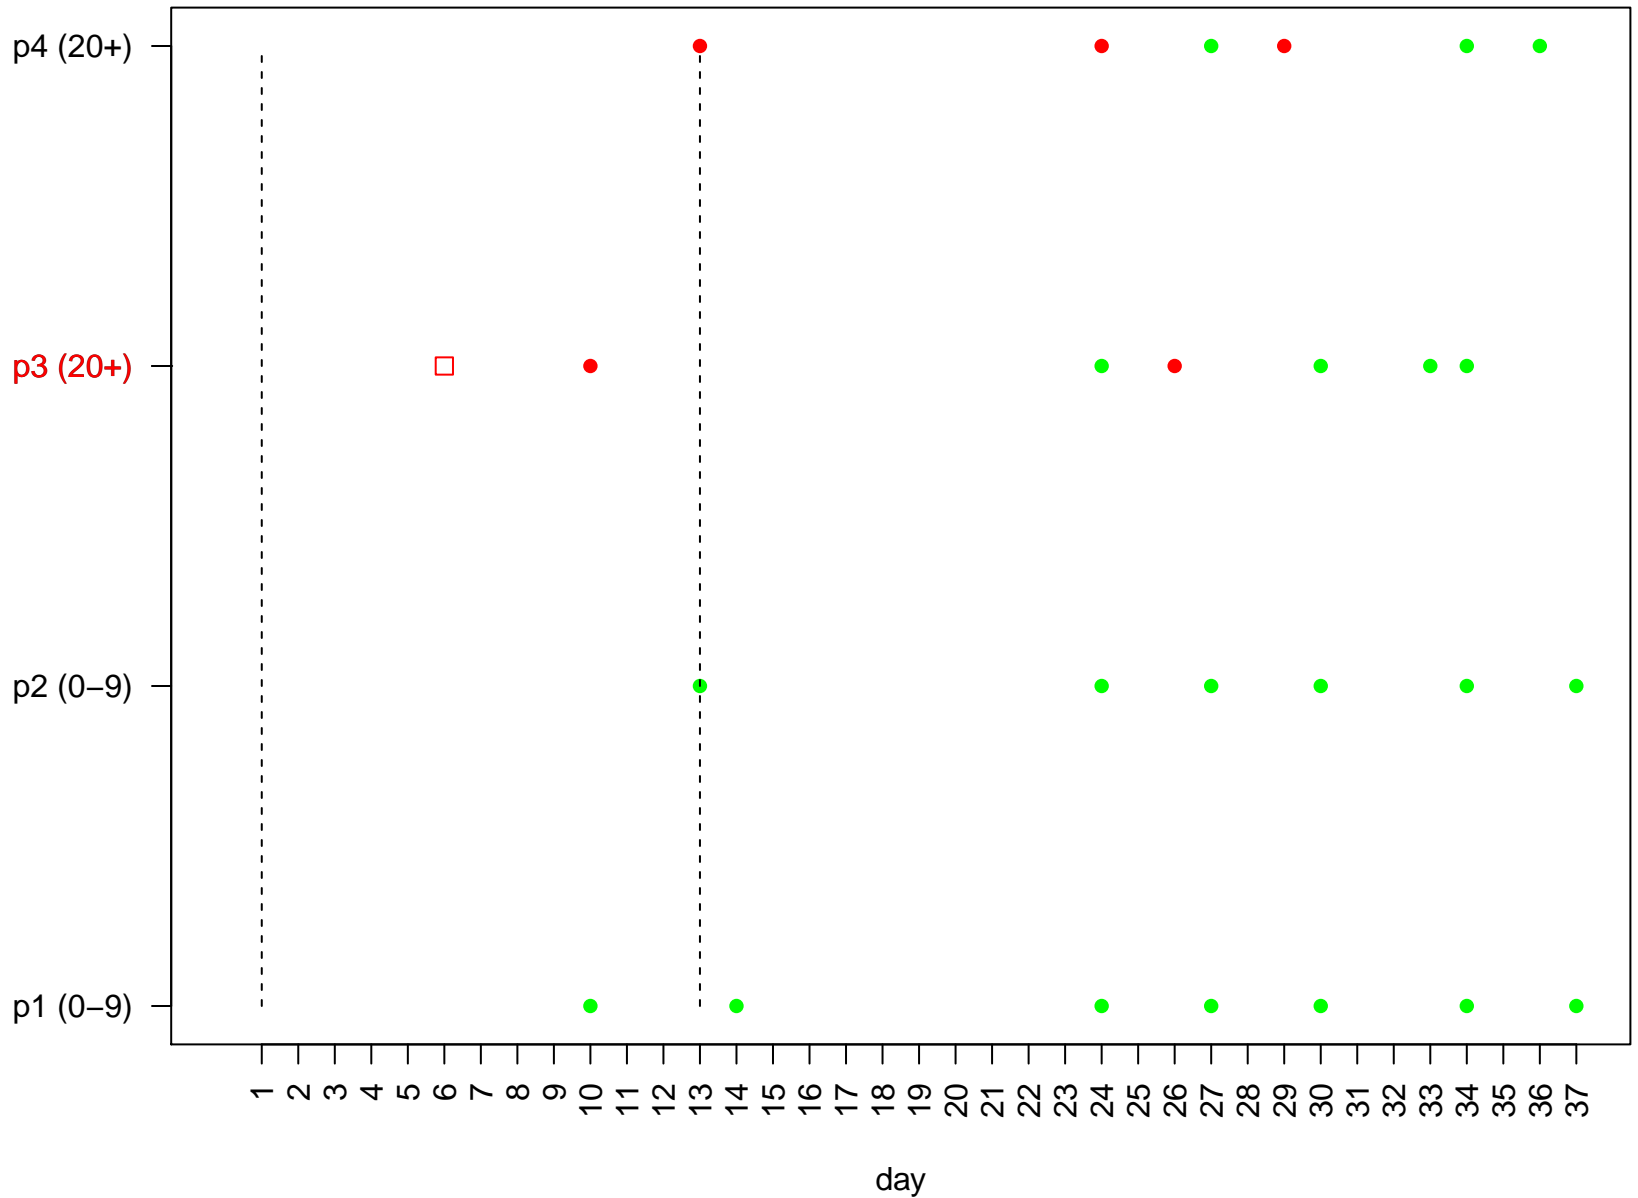



# Household 249

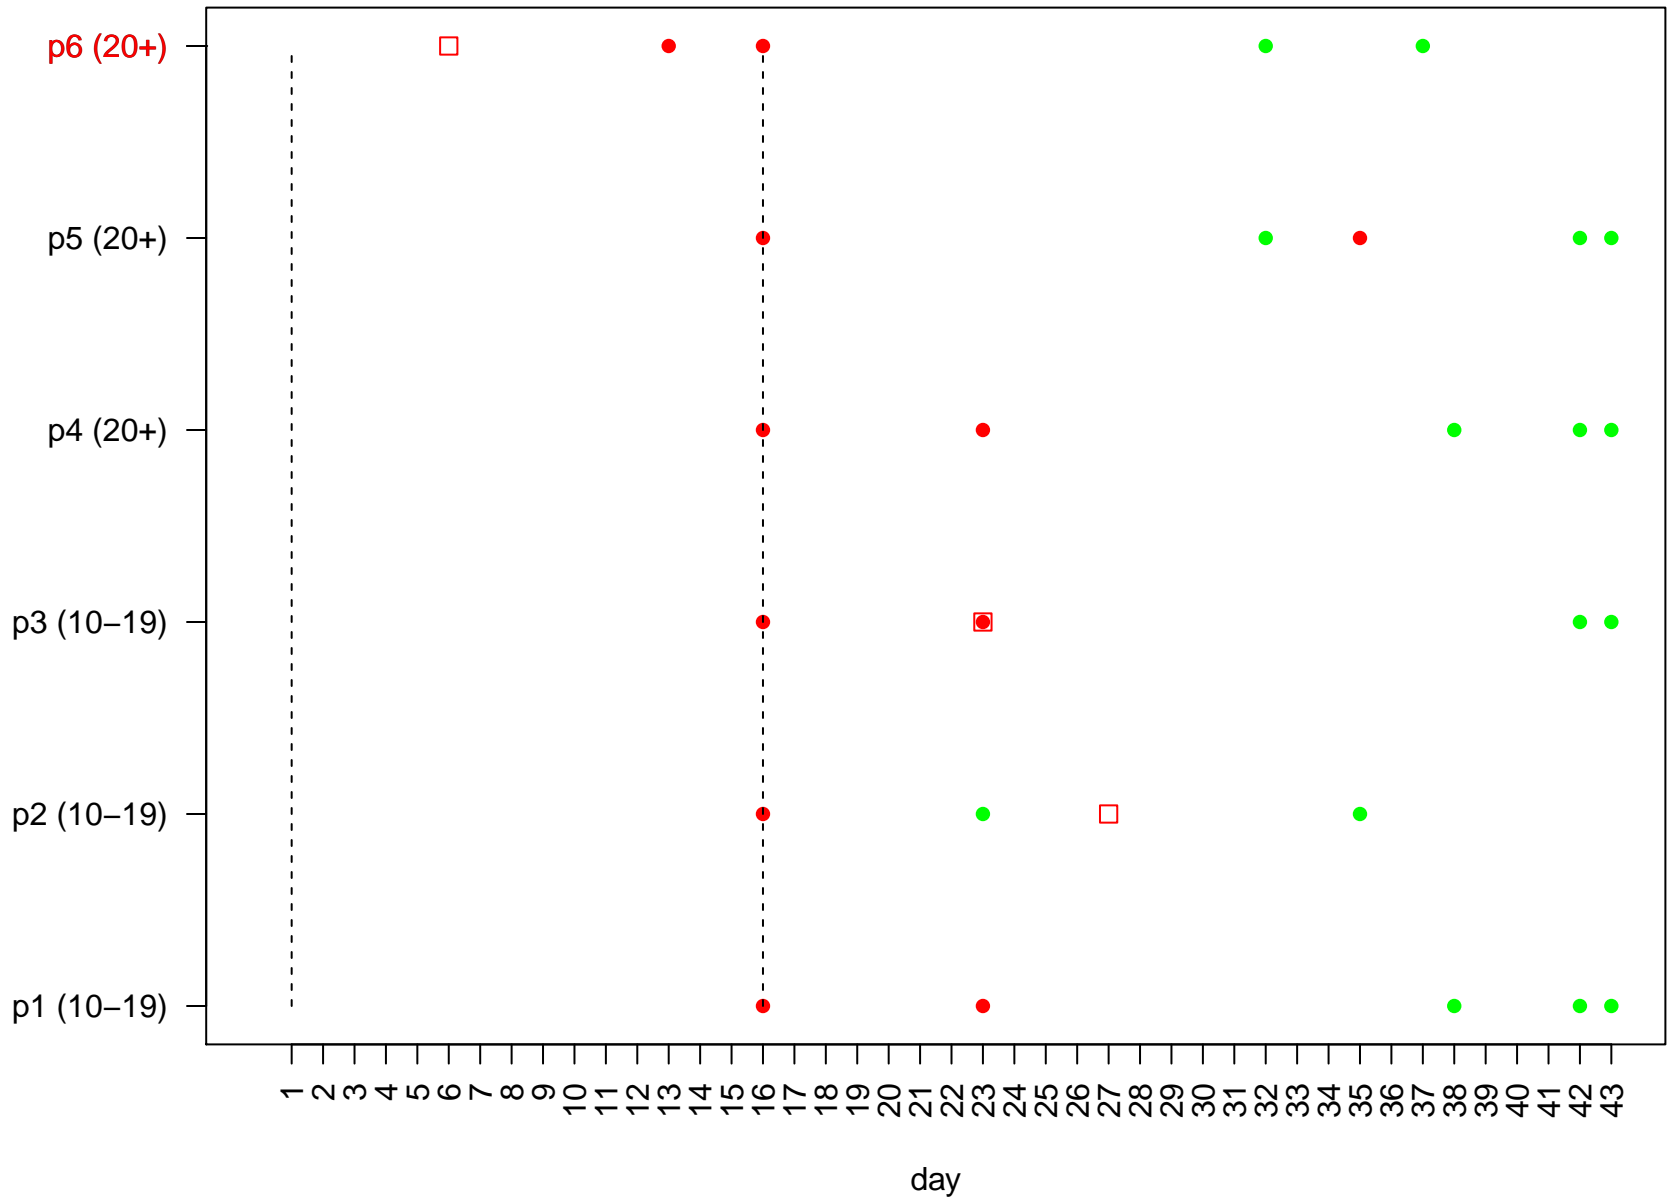

# Household 250

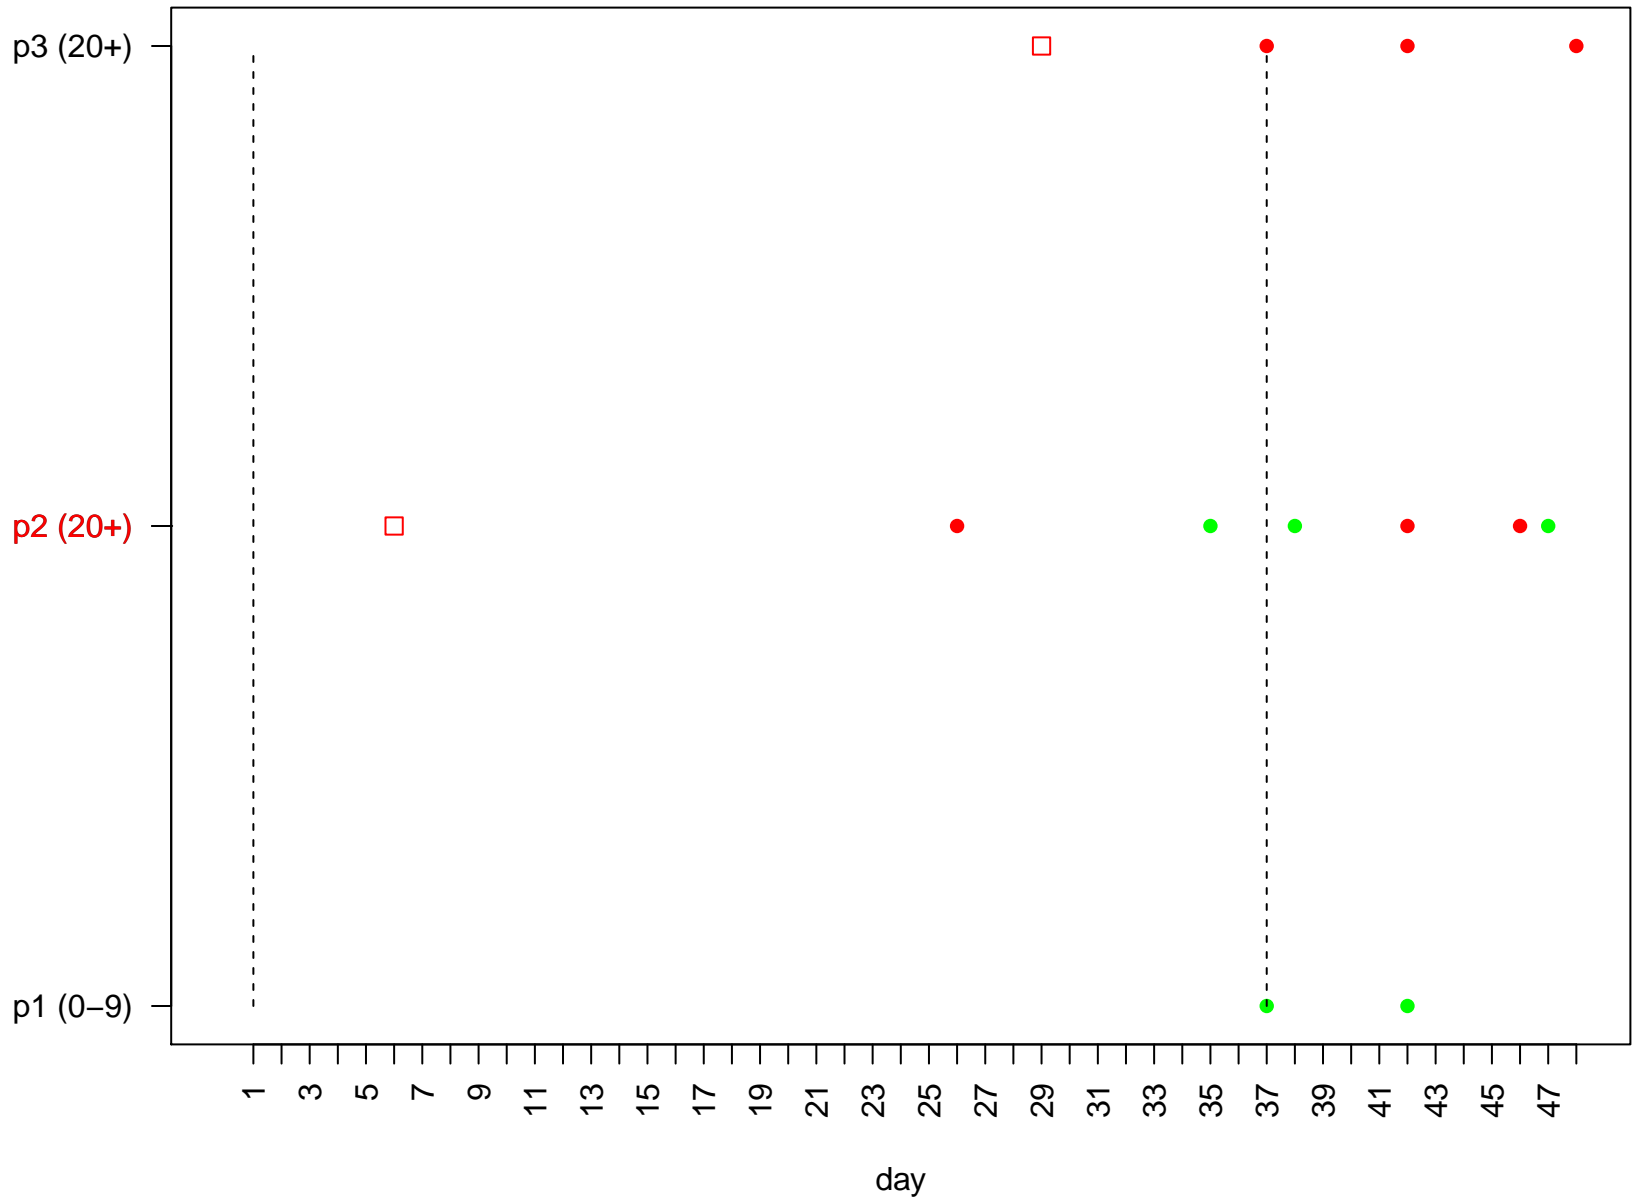

# Household 251

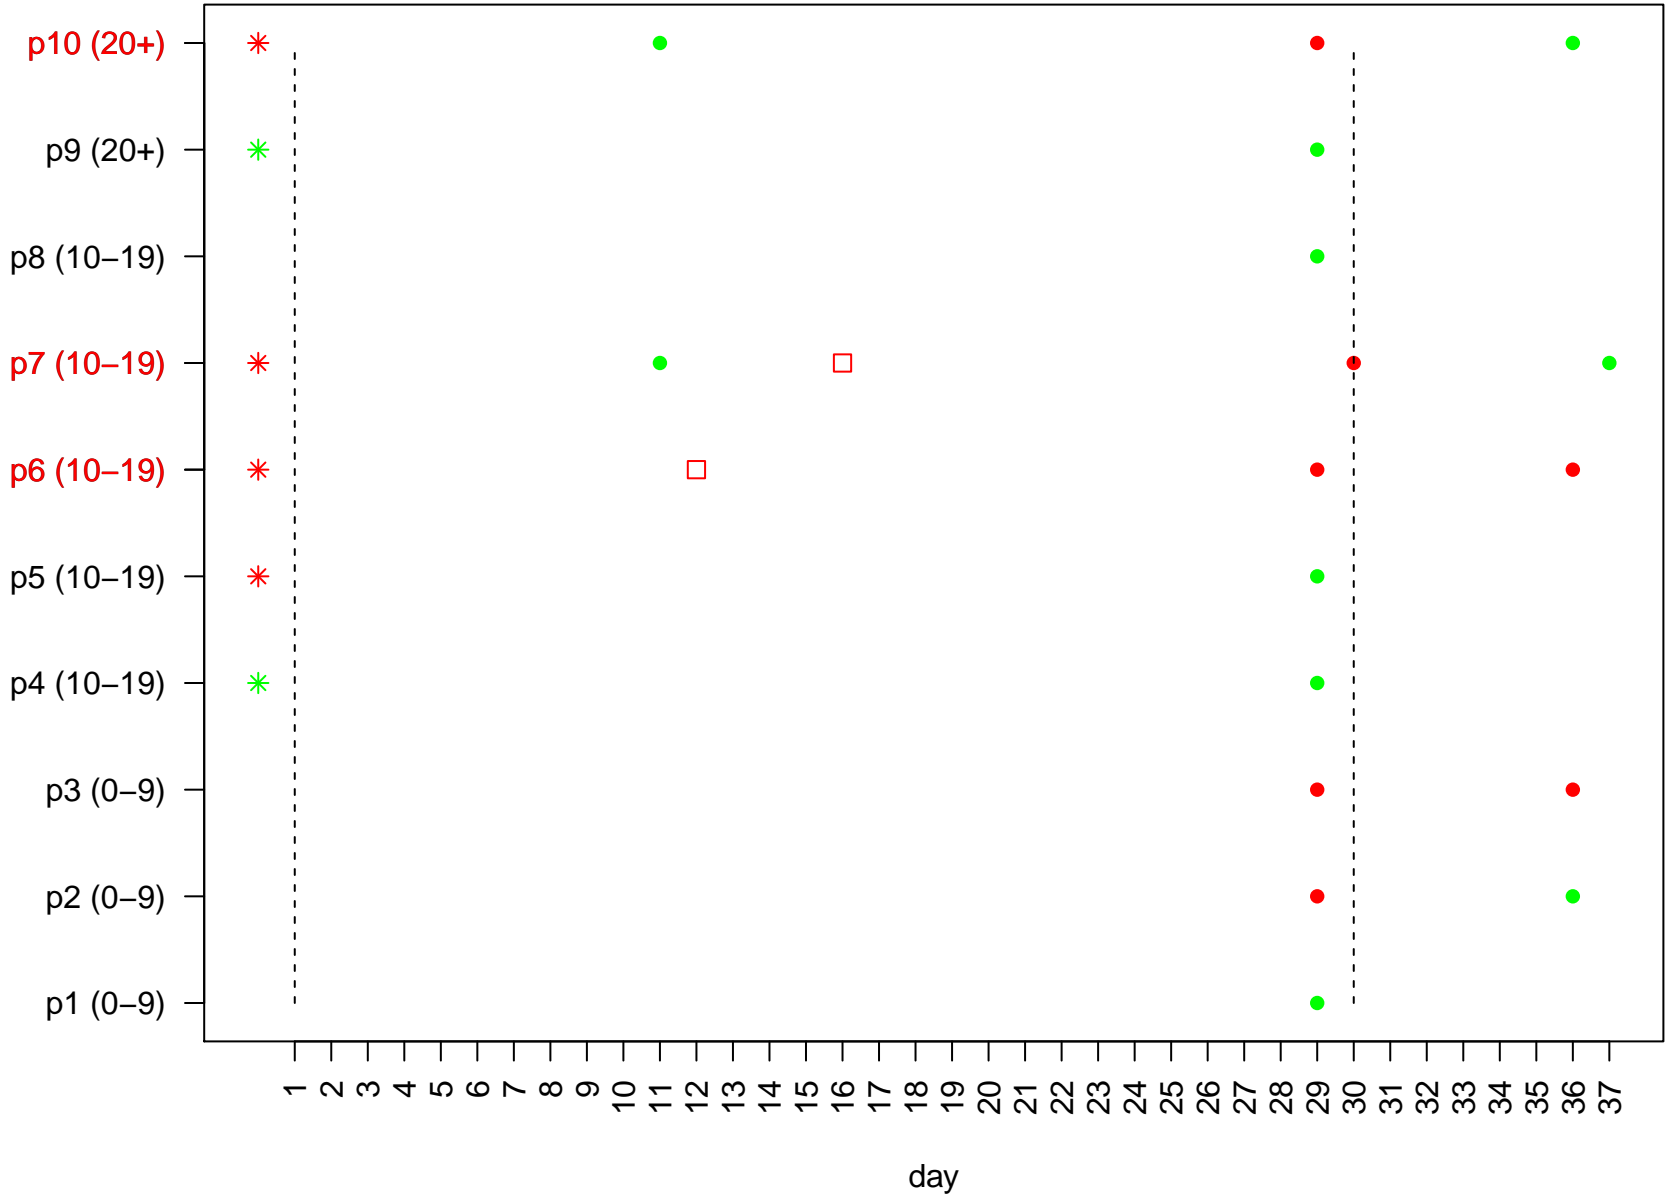

# Household 252

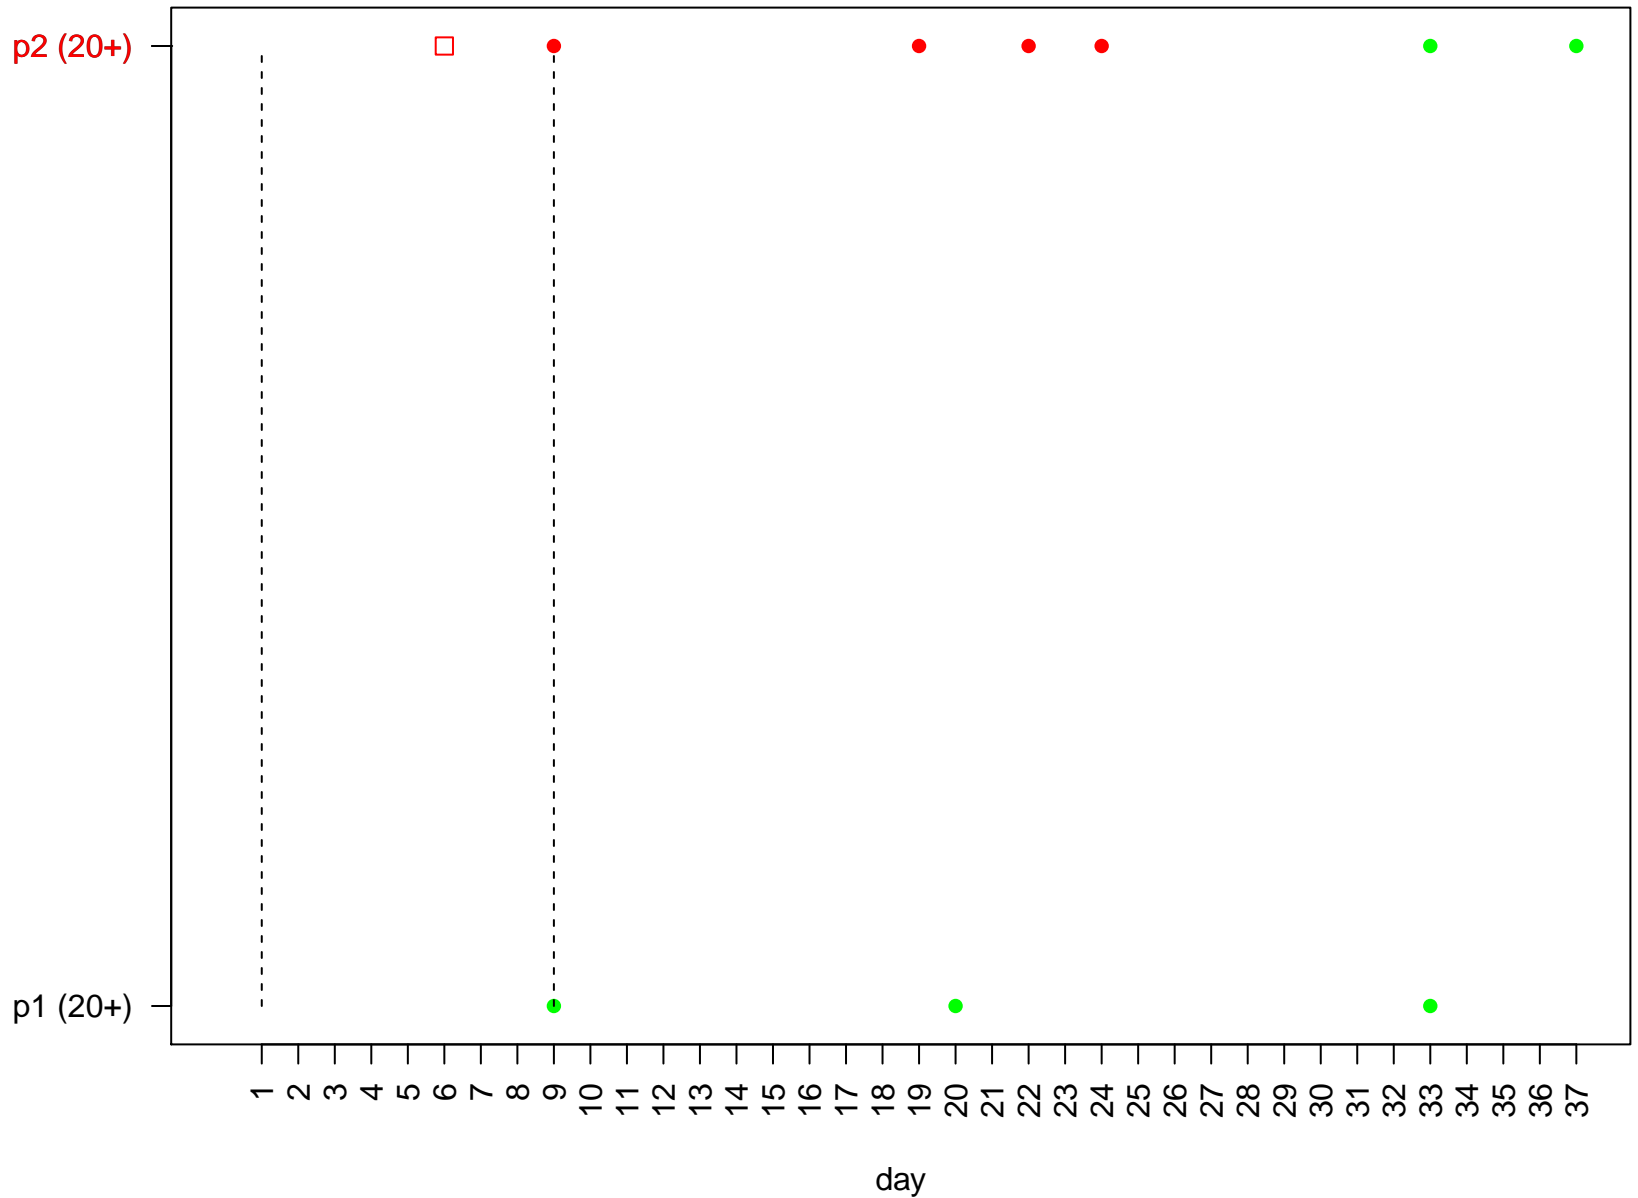

# Household 253

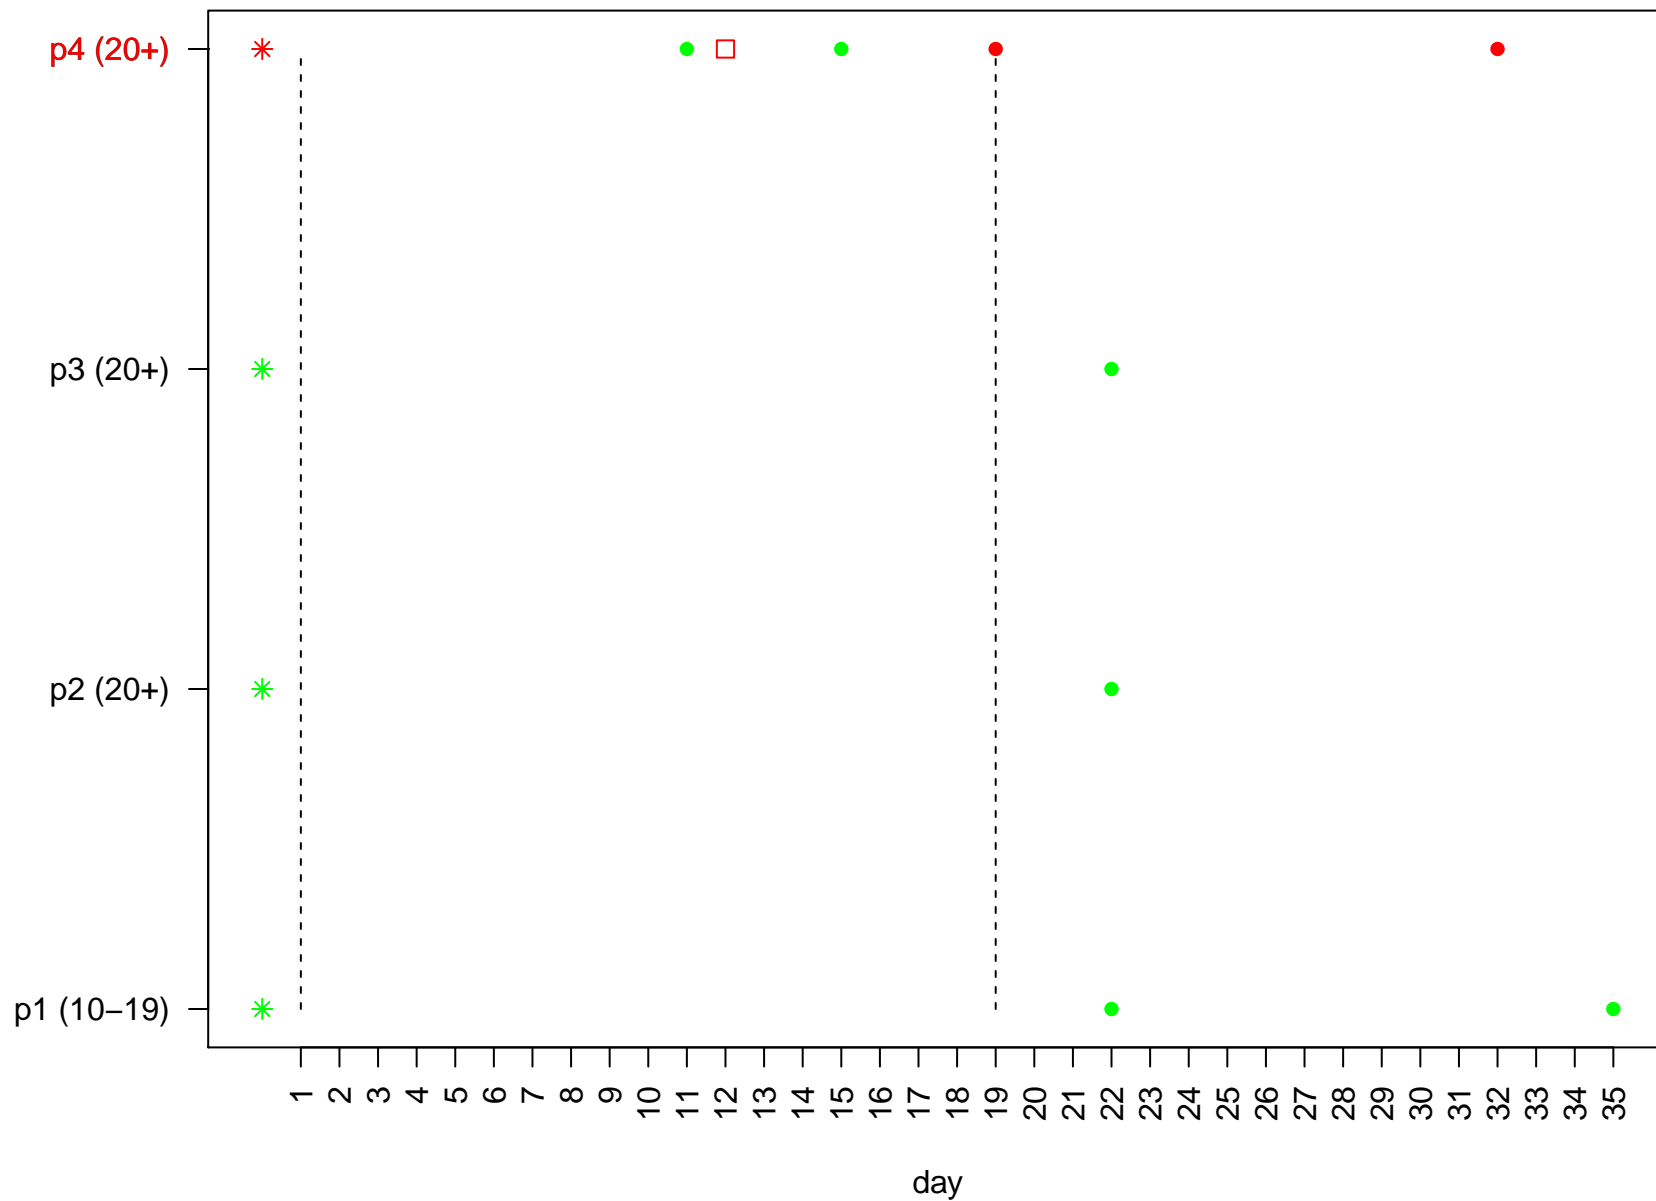

# Household 254

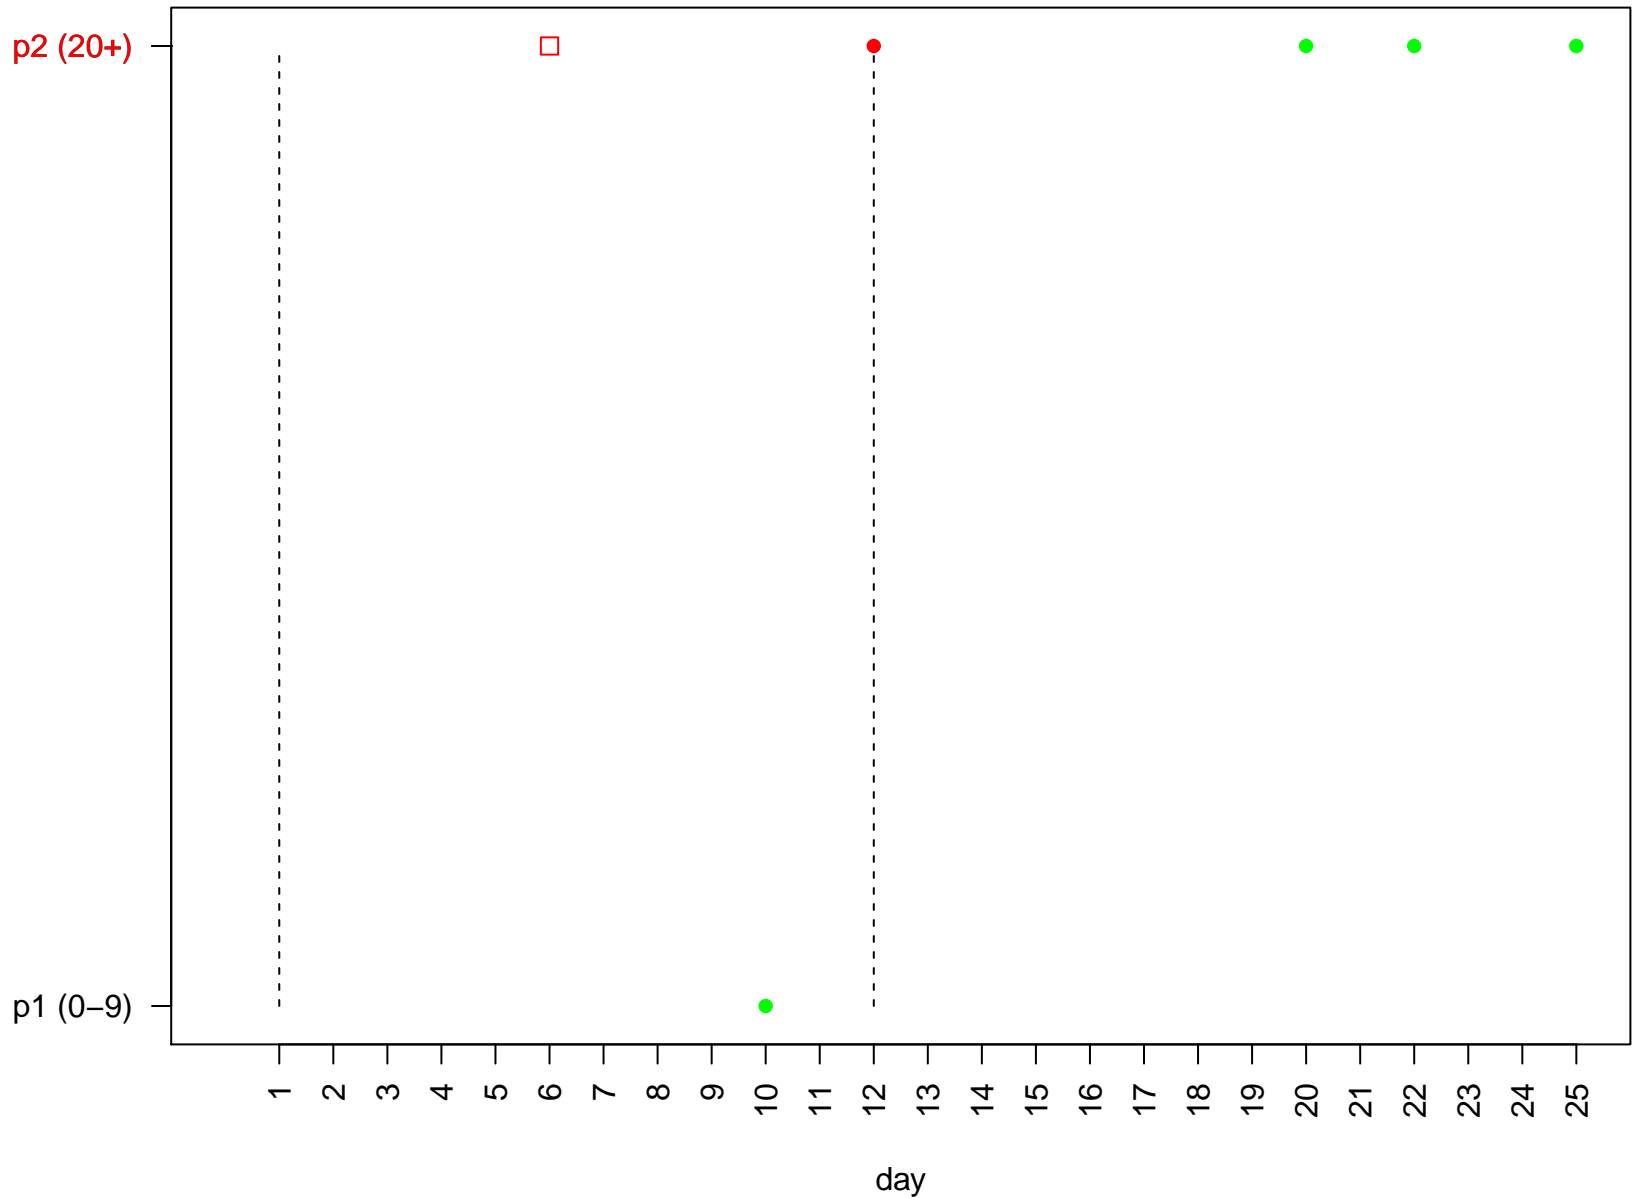

# Household 255

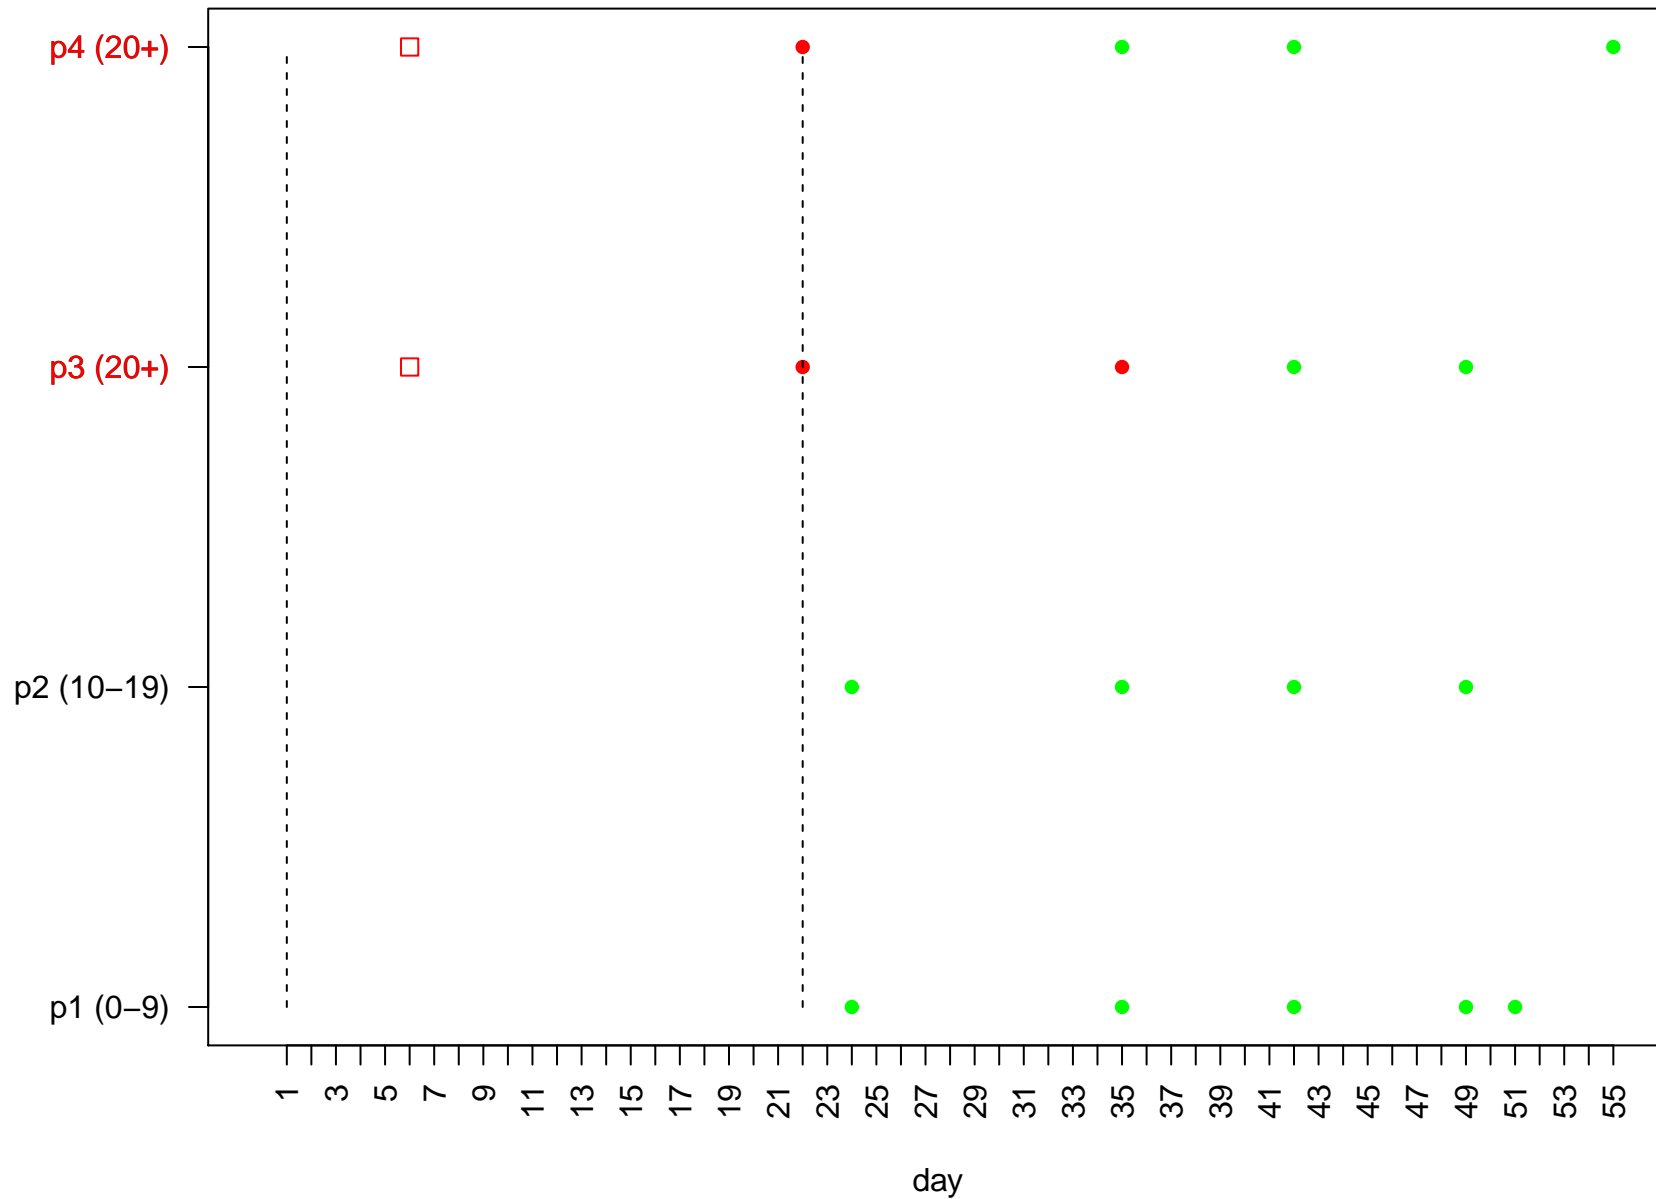

# Household 256

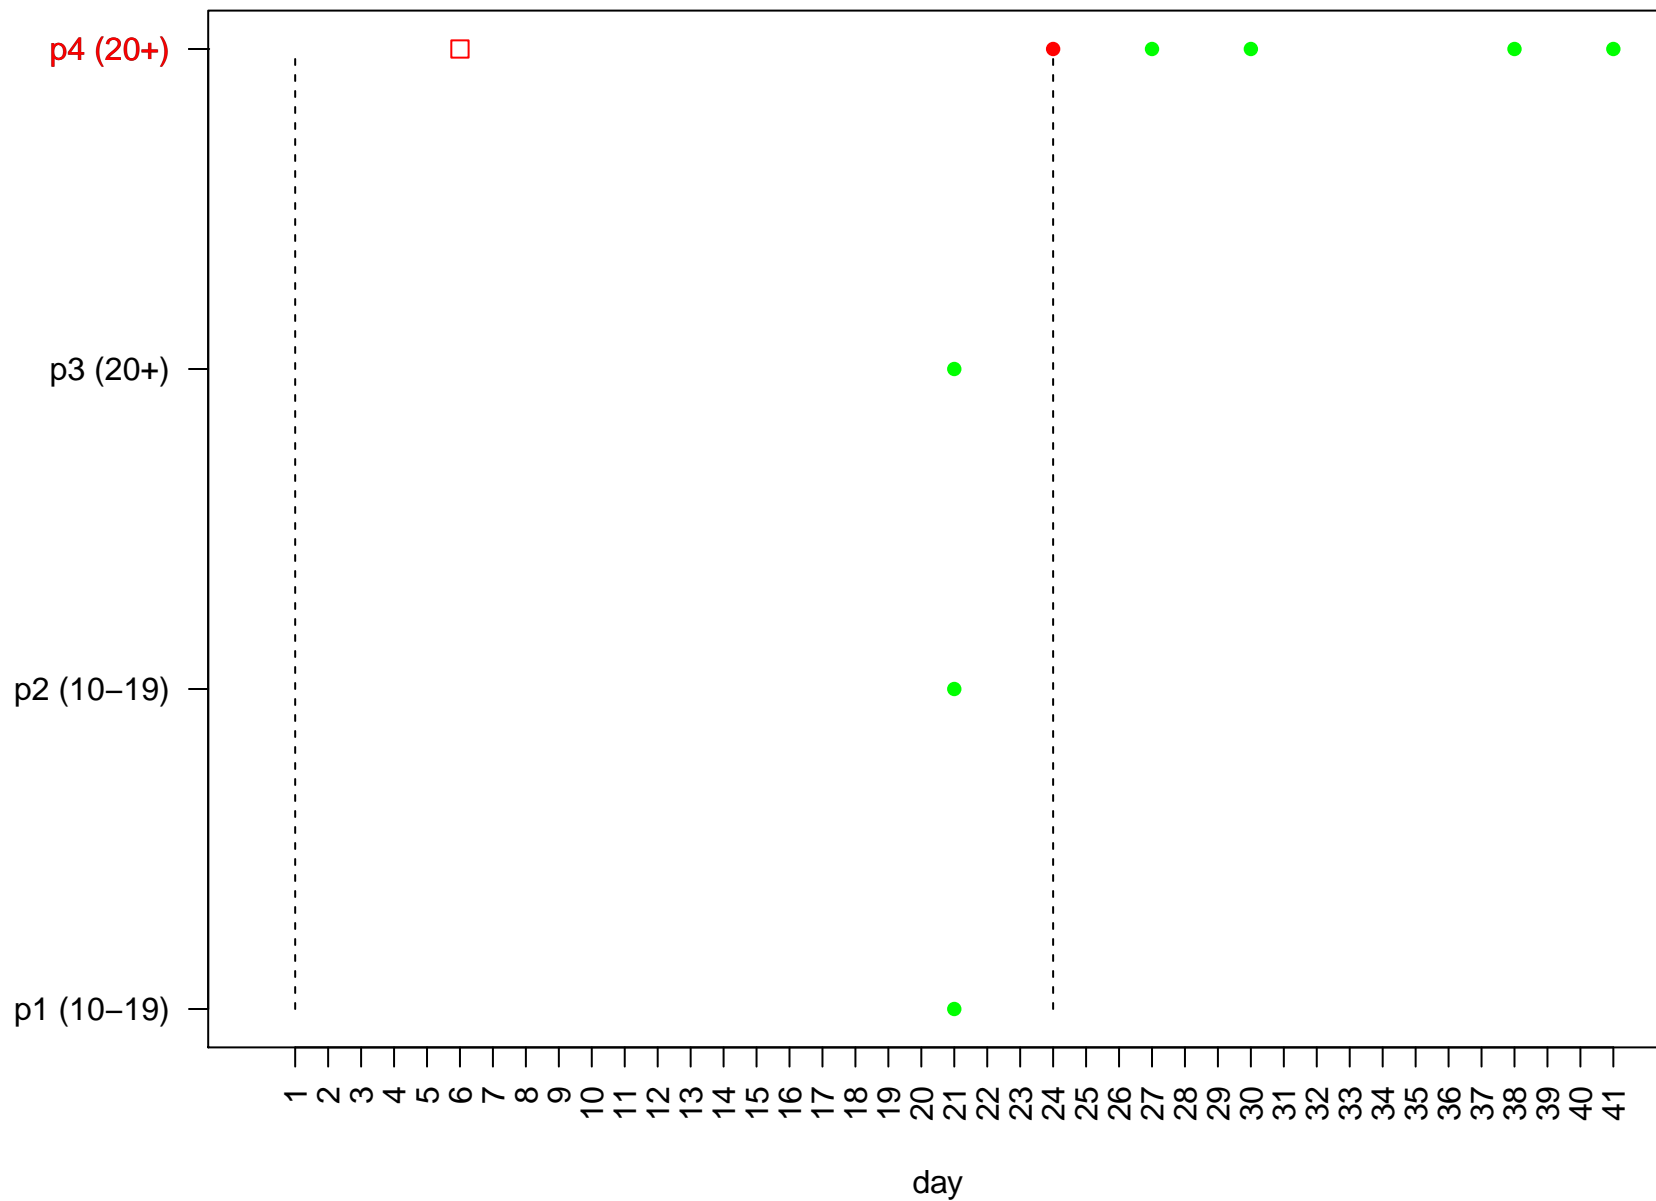



# Household 257

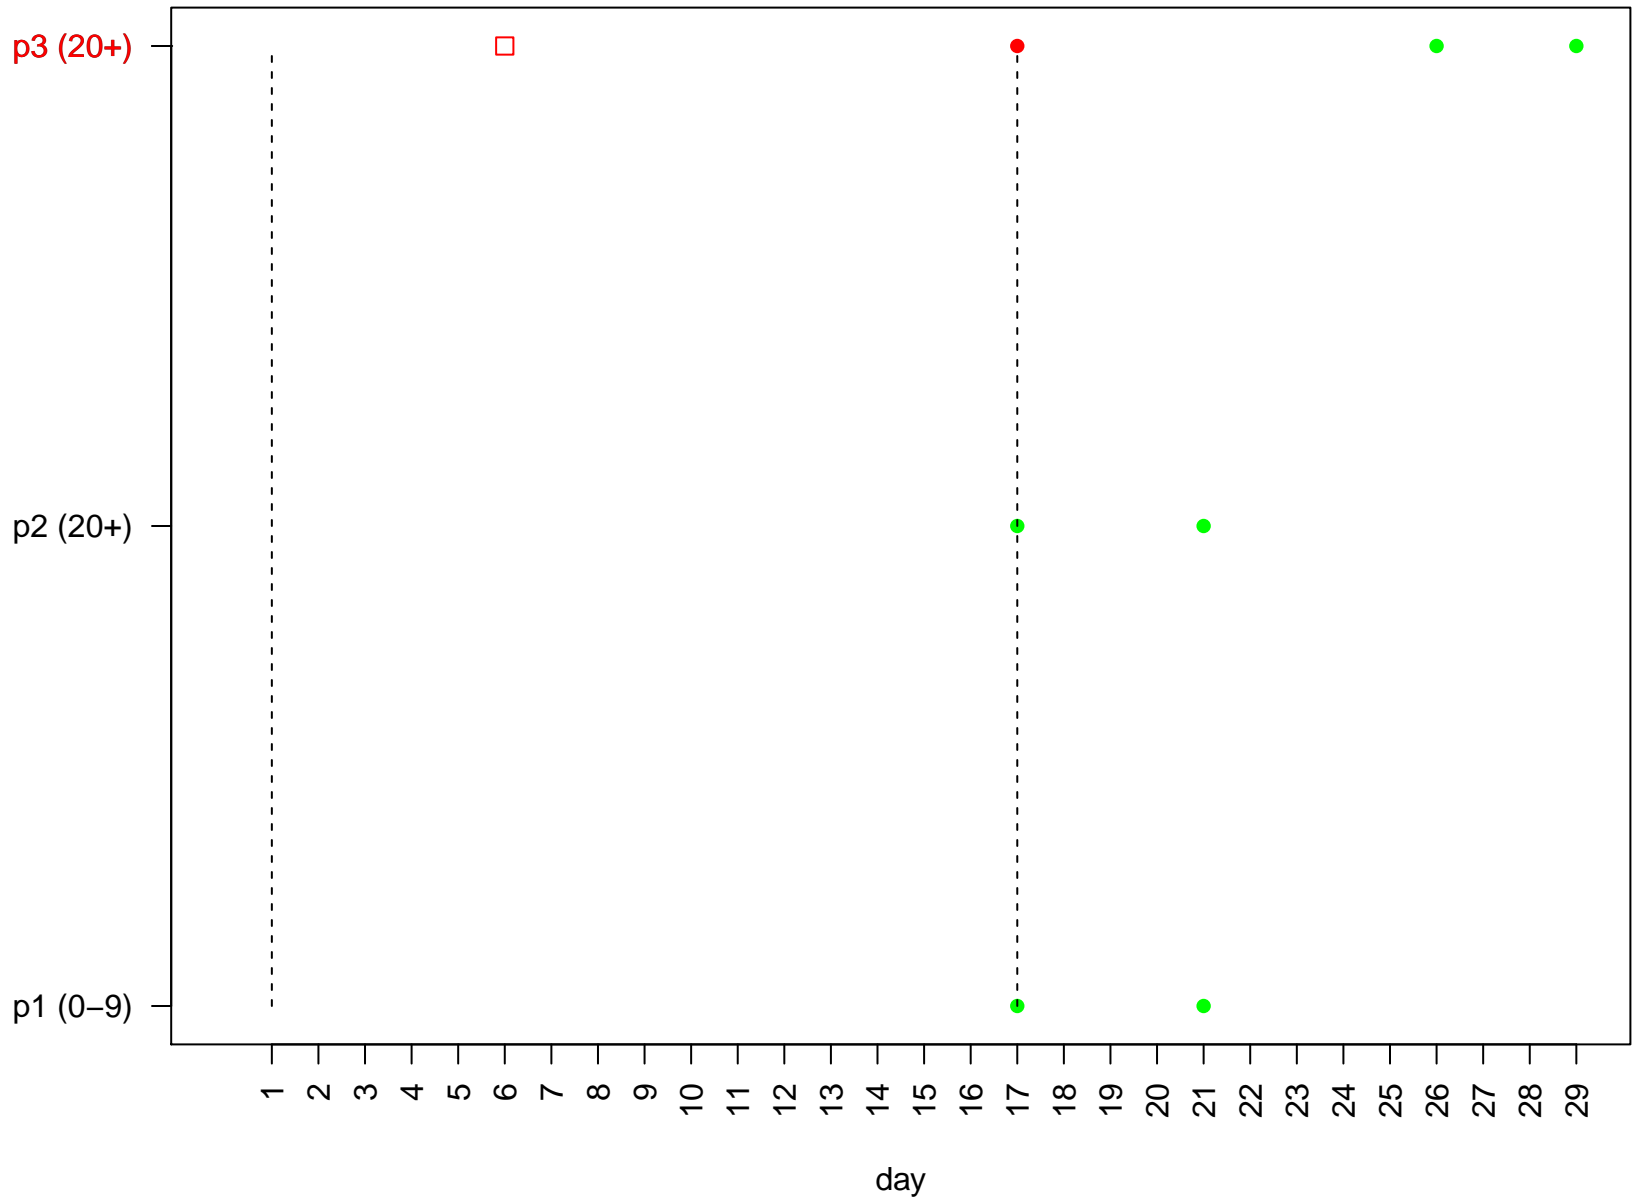

# Household 258

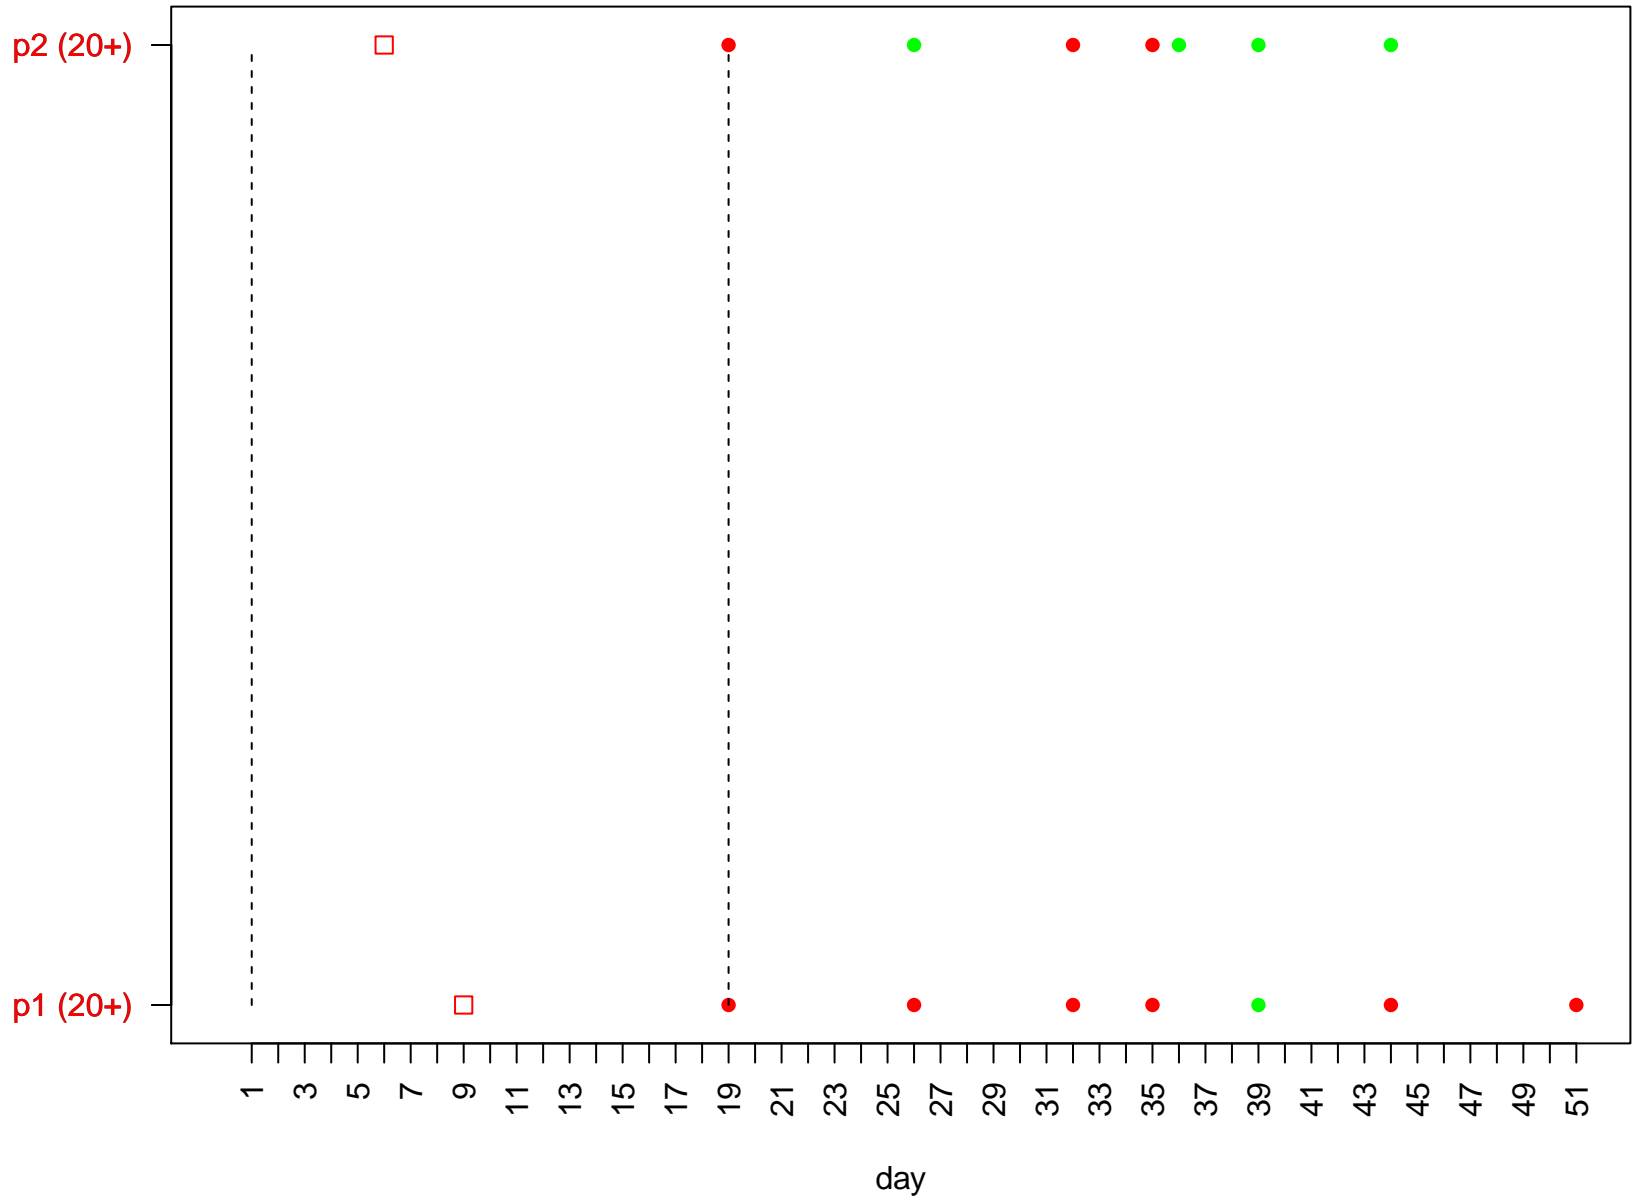

# Household 259

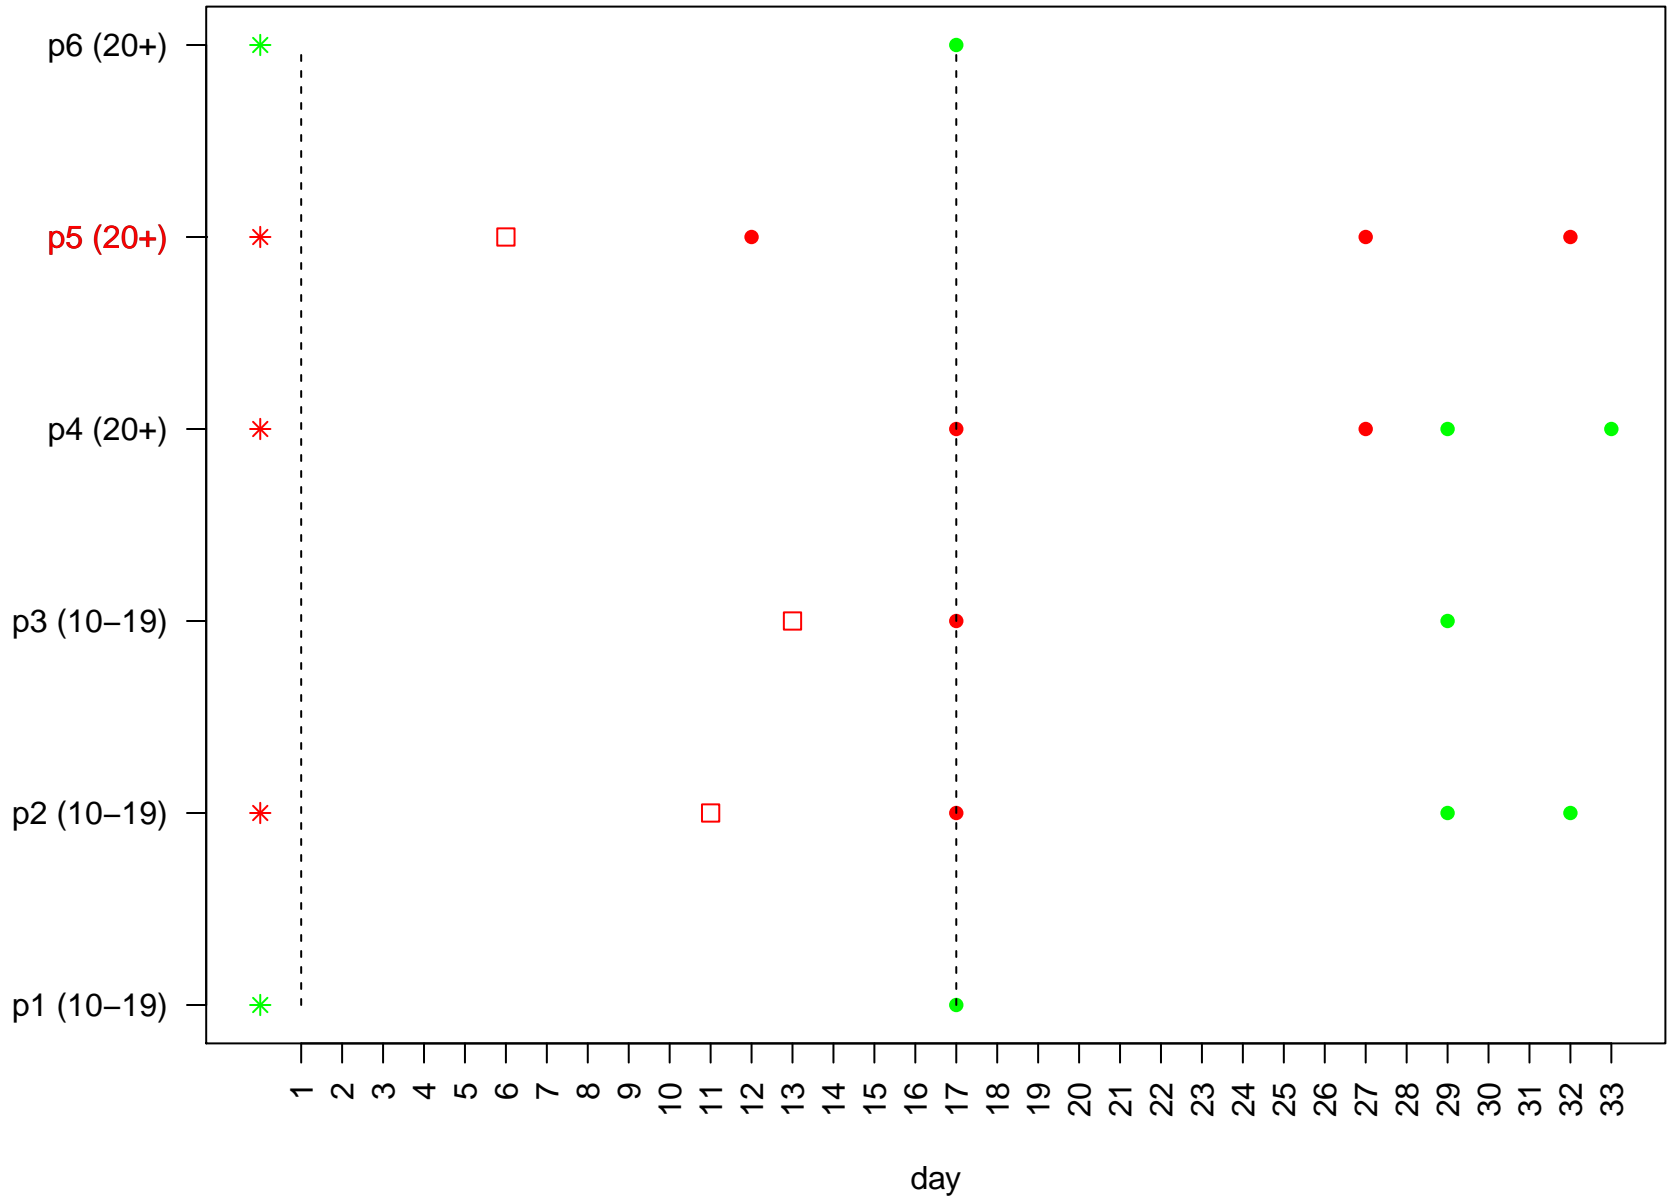

# Household 260

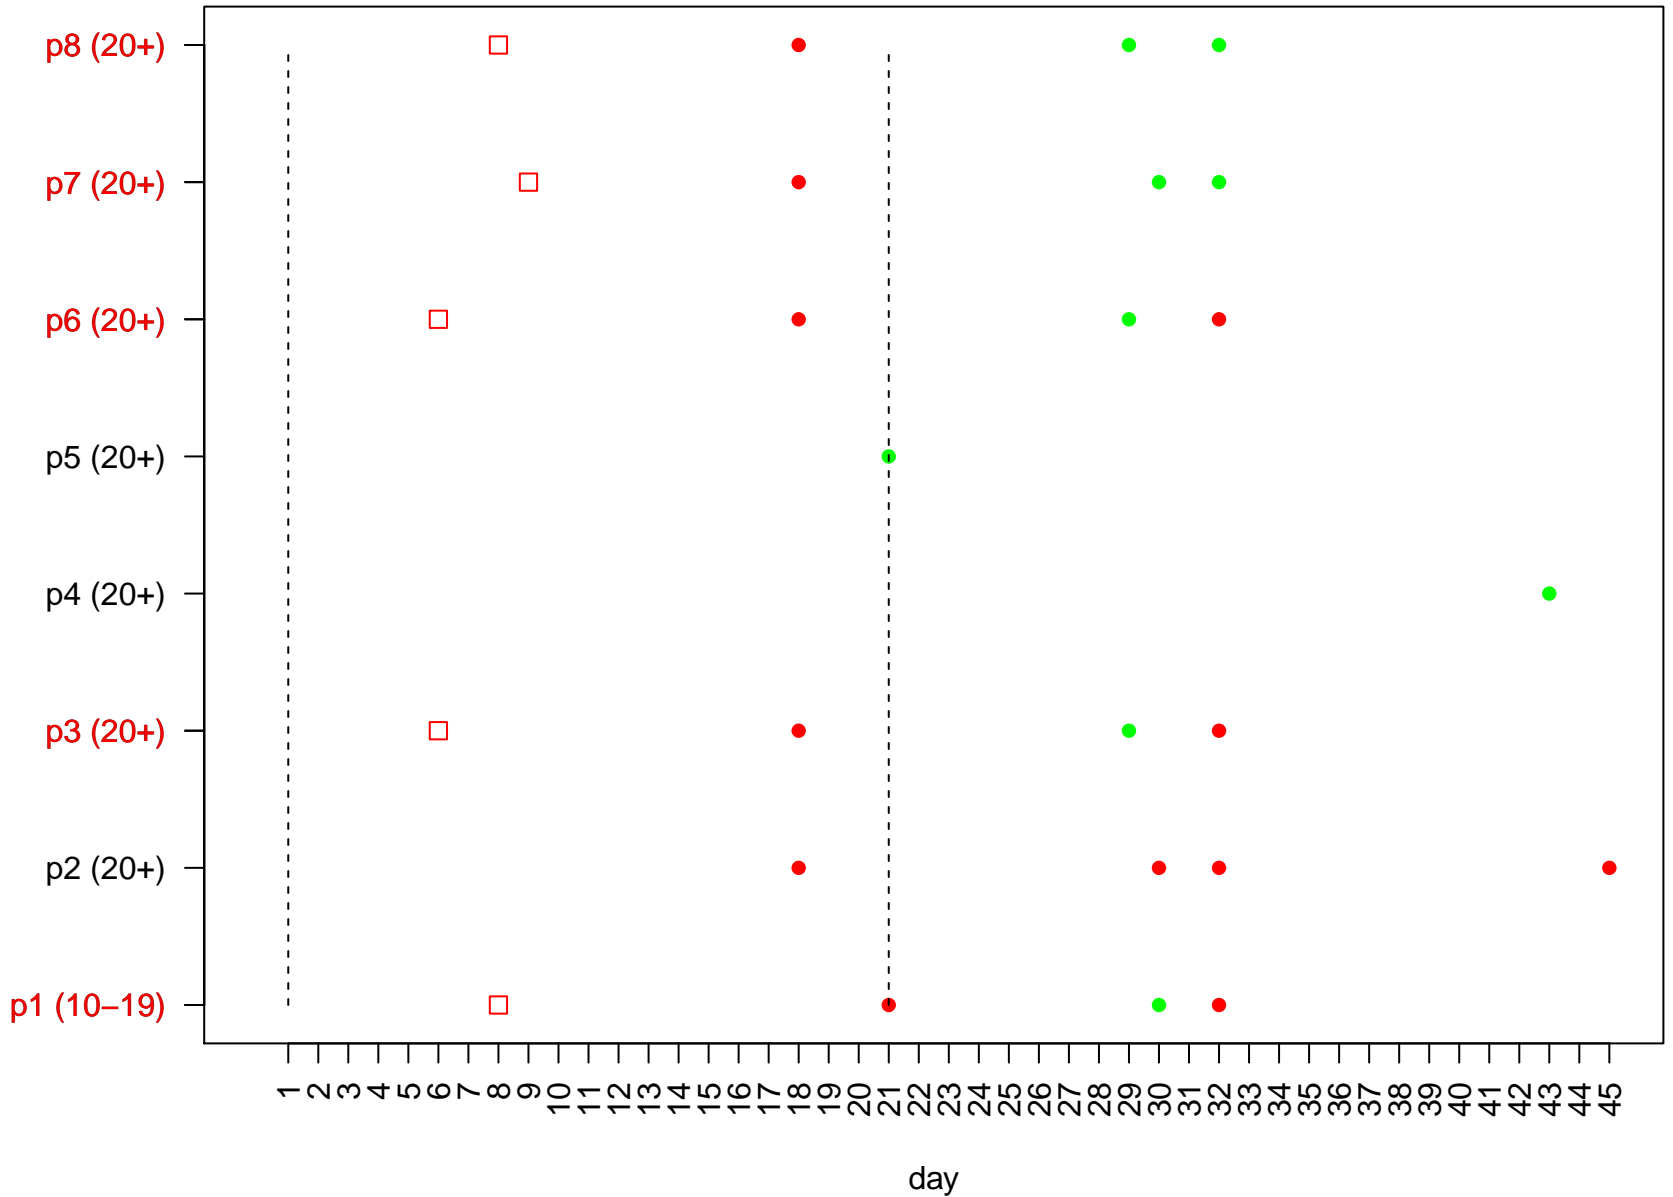

# Household 261

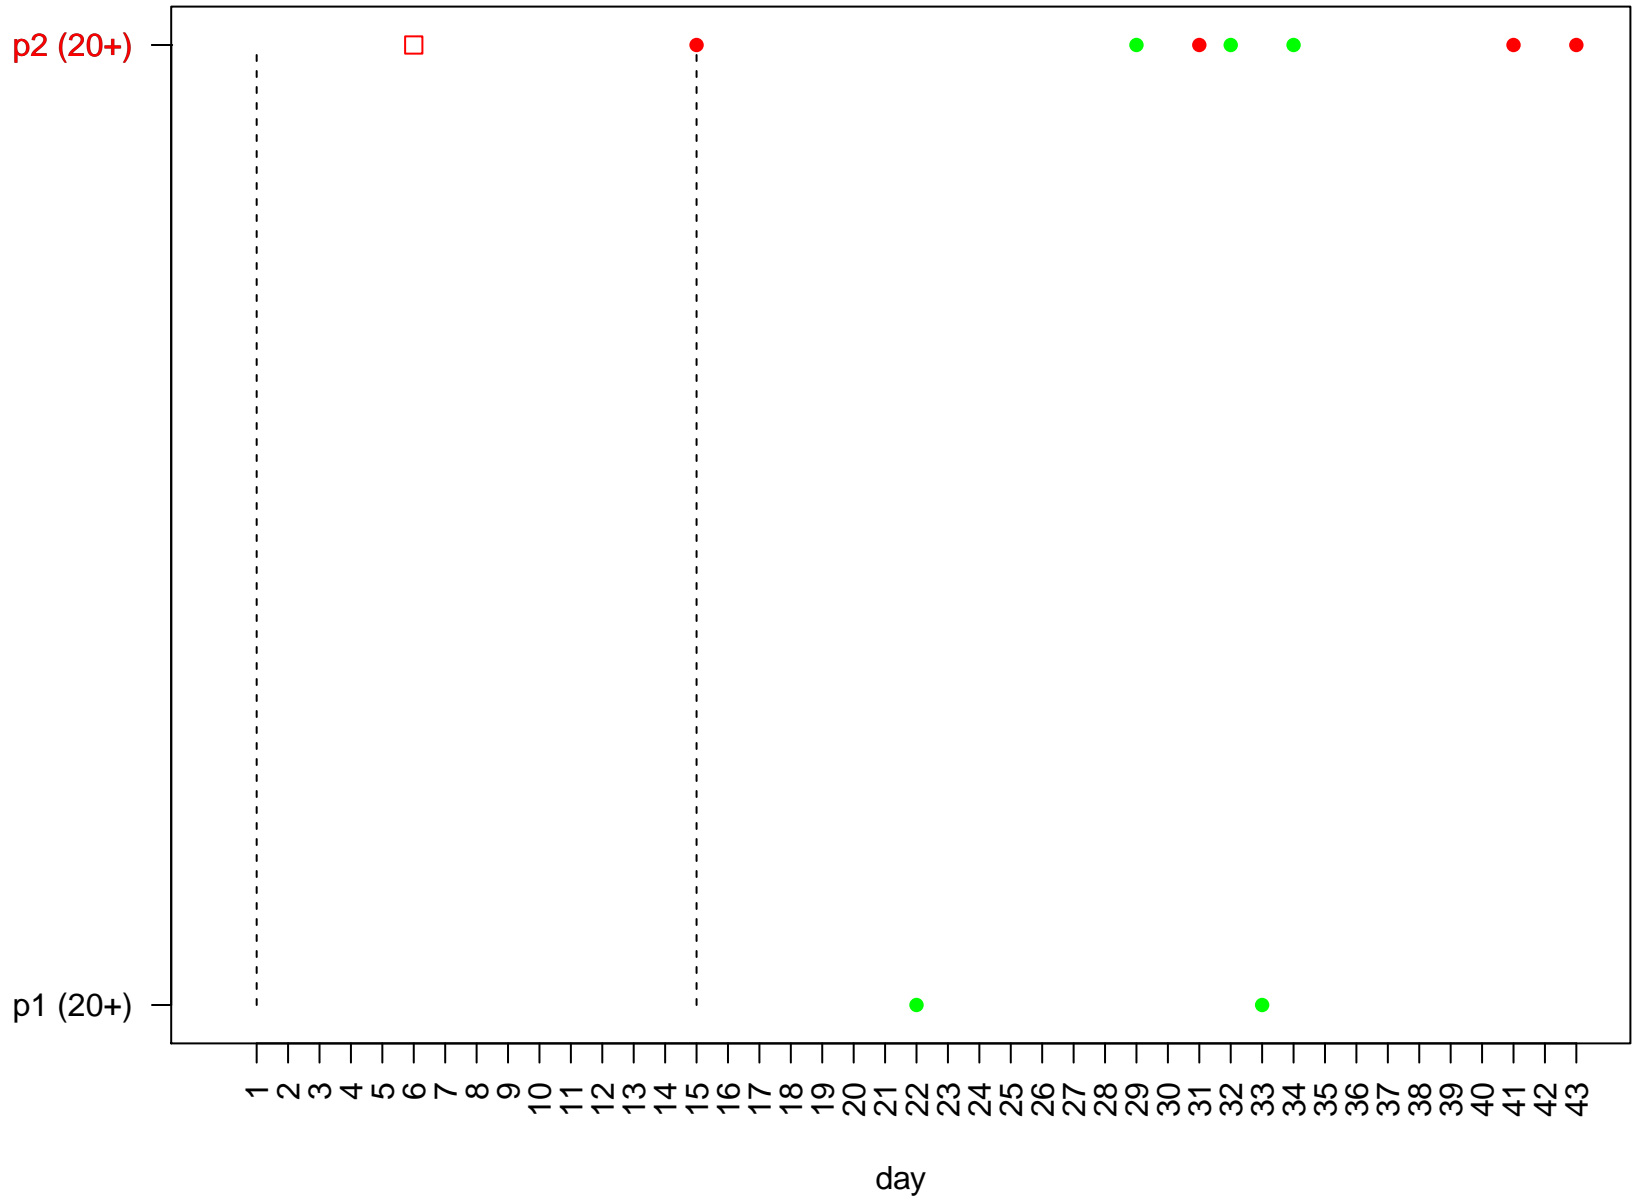

# Household 262

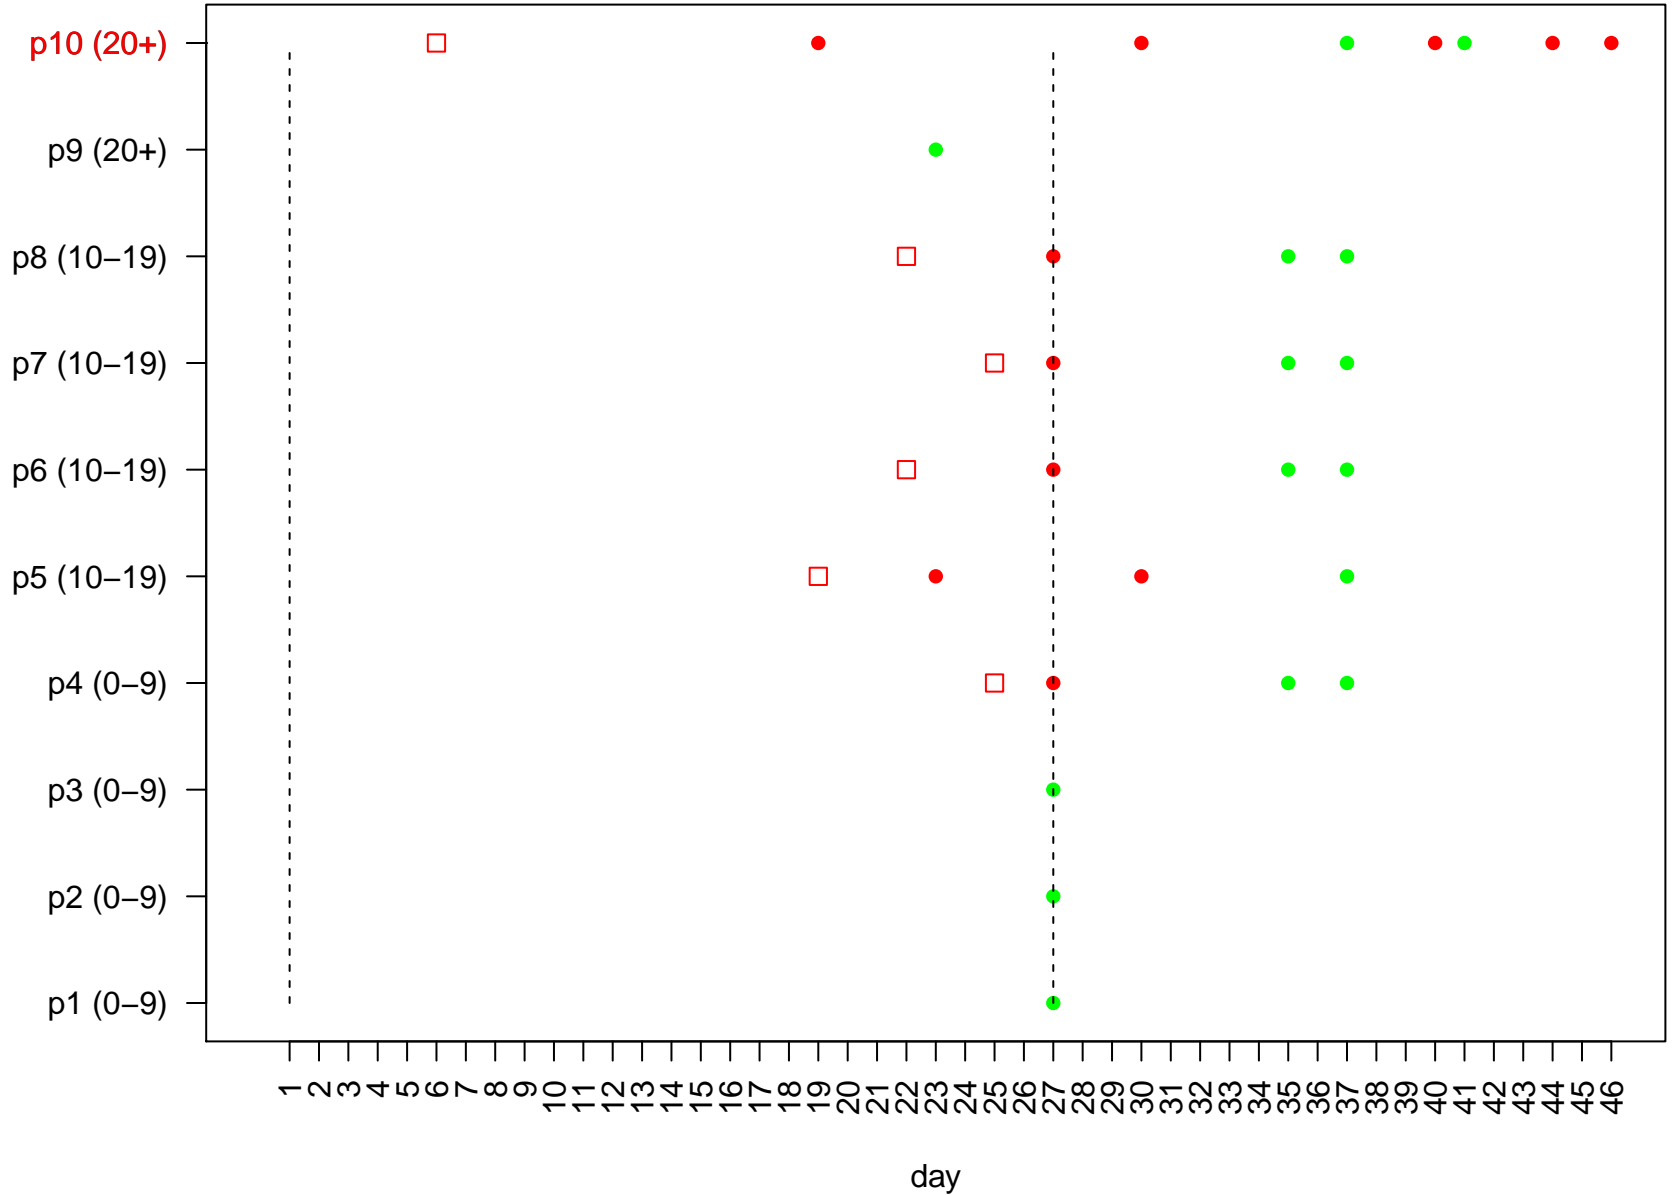

# Household 263

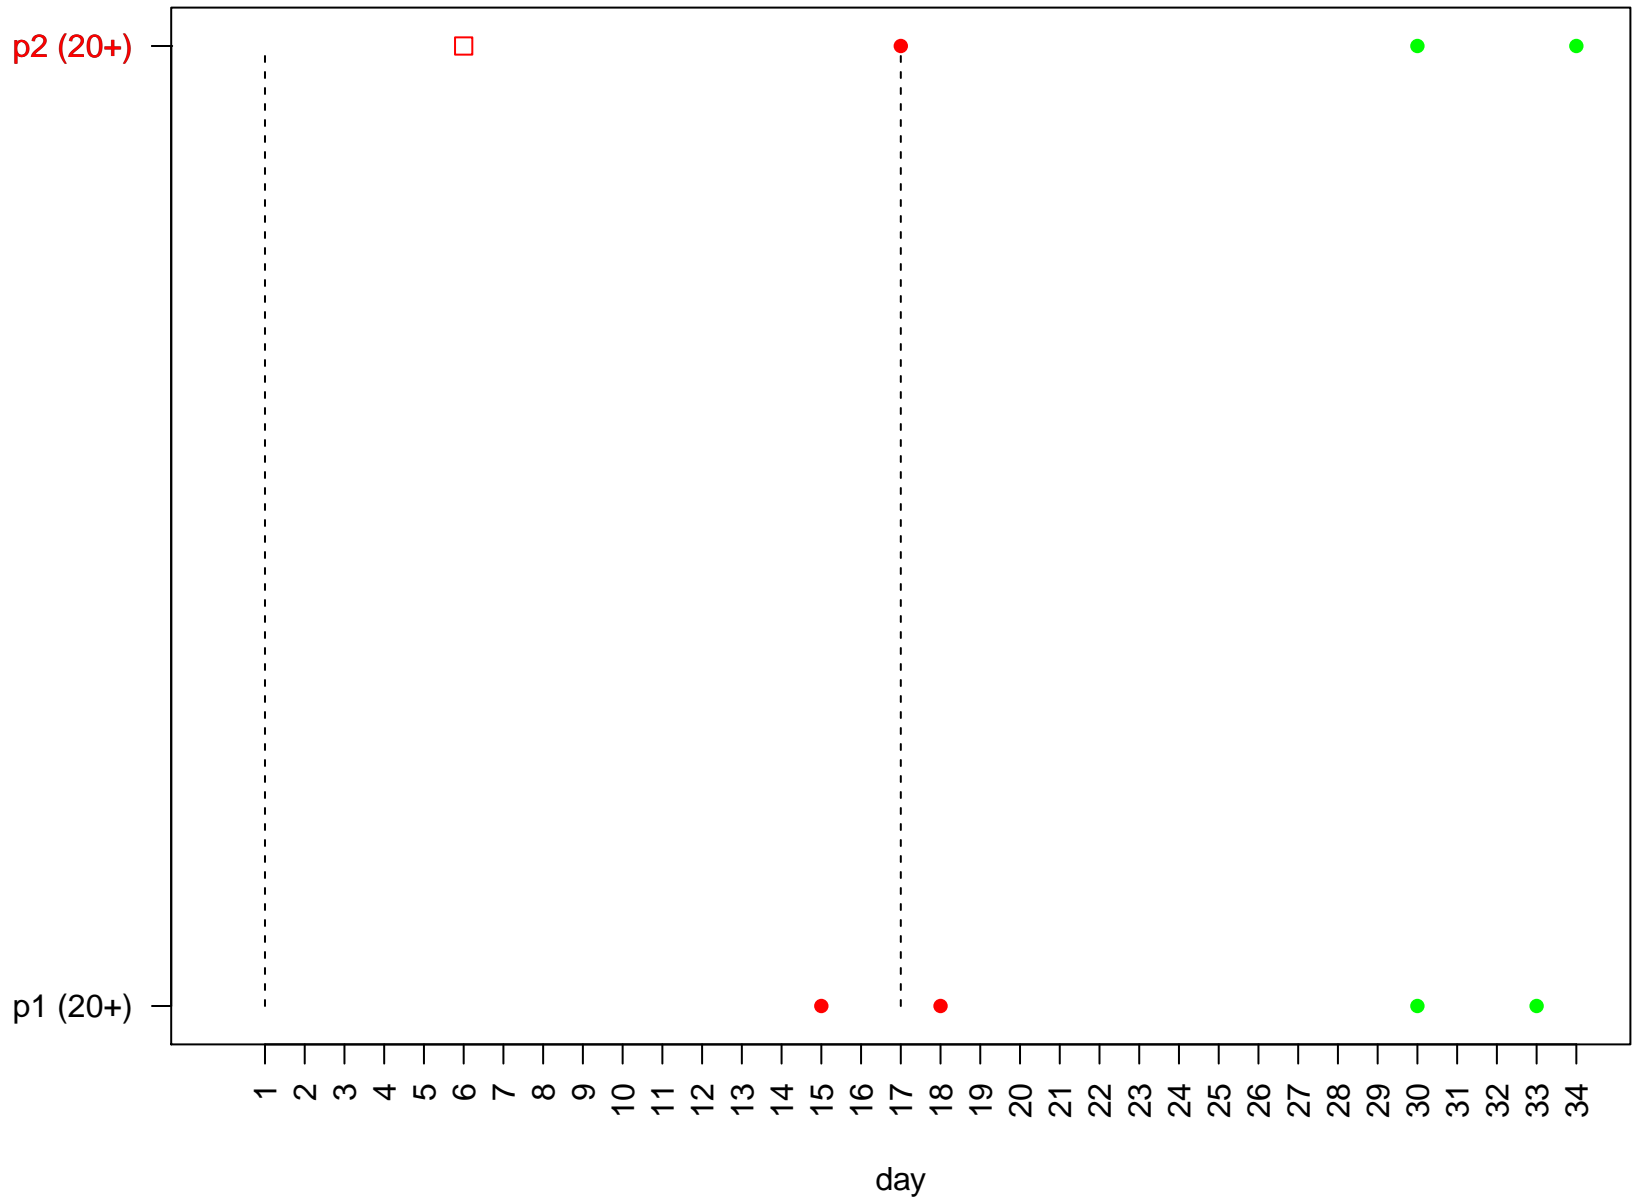

# Household 264

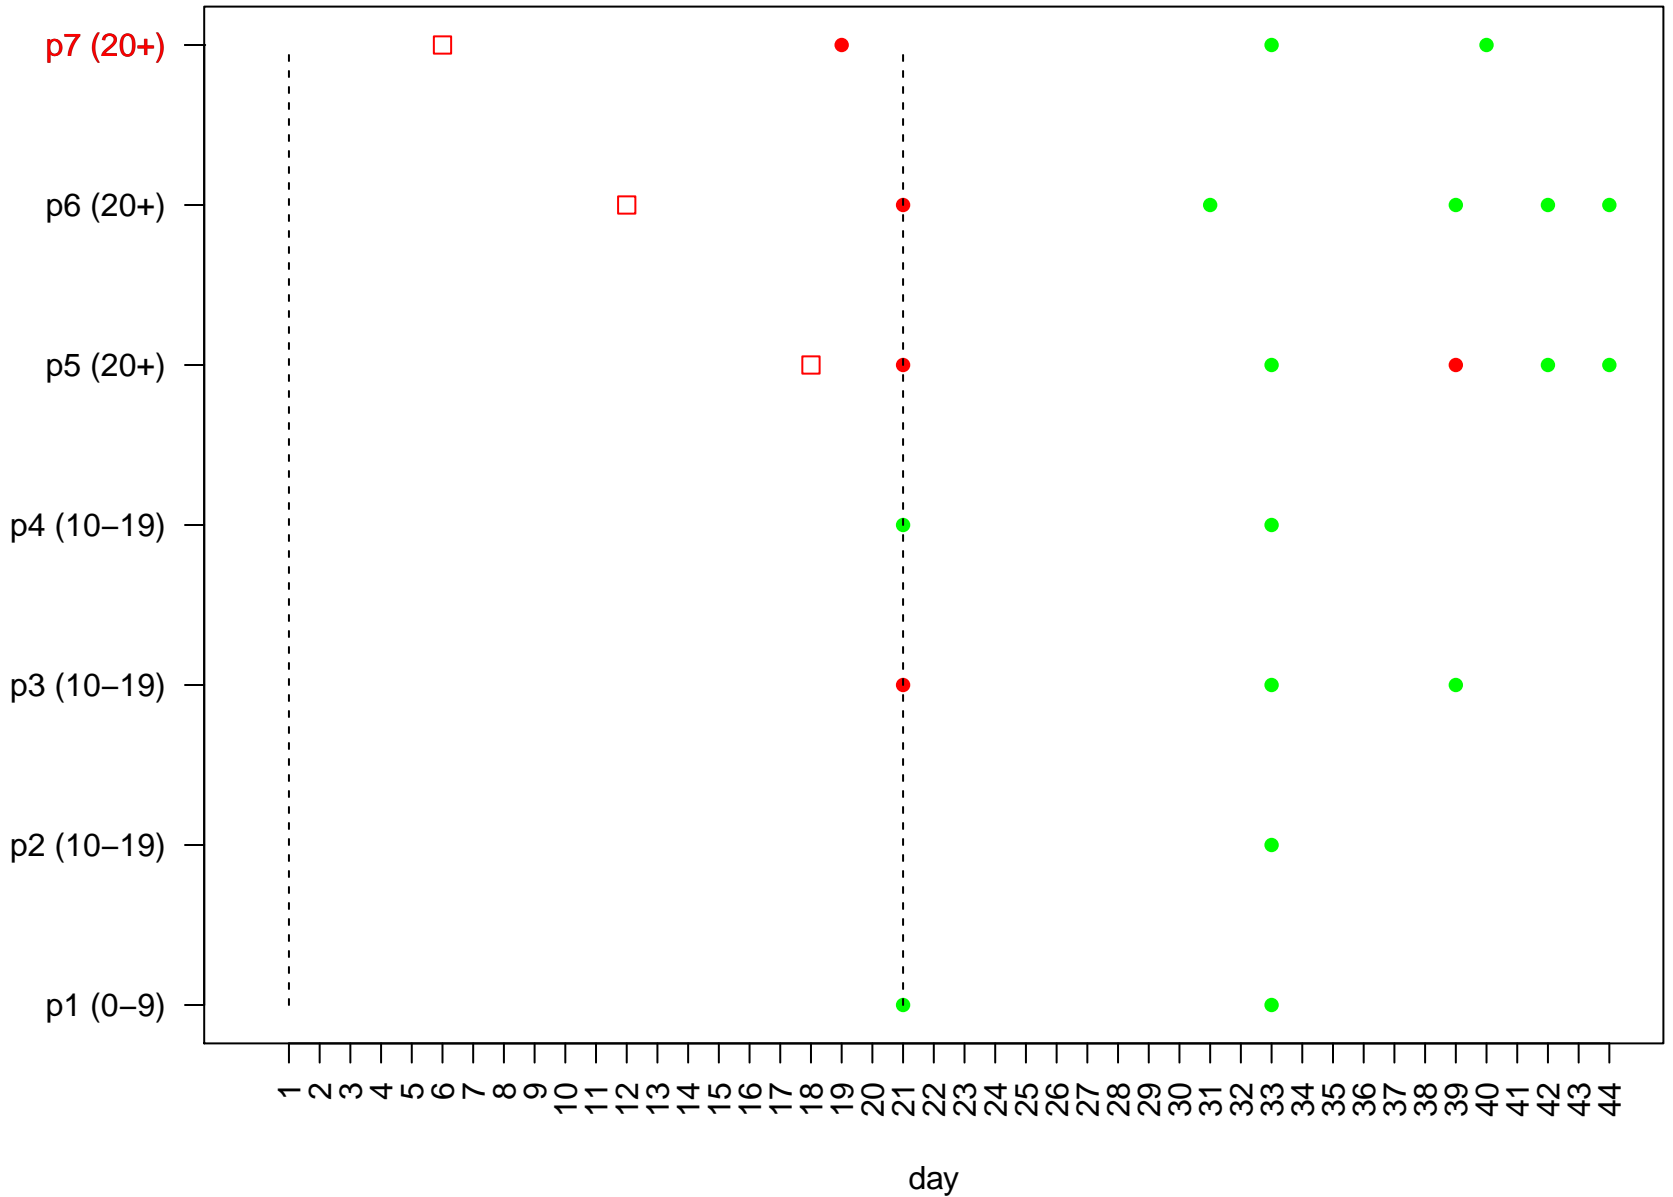



# Household 265

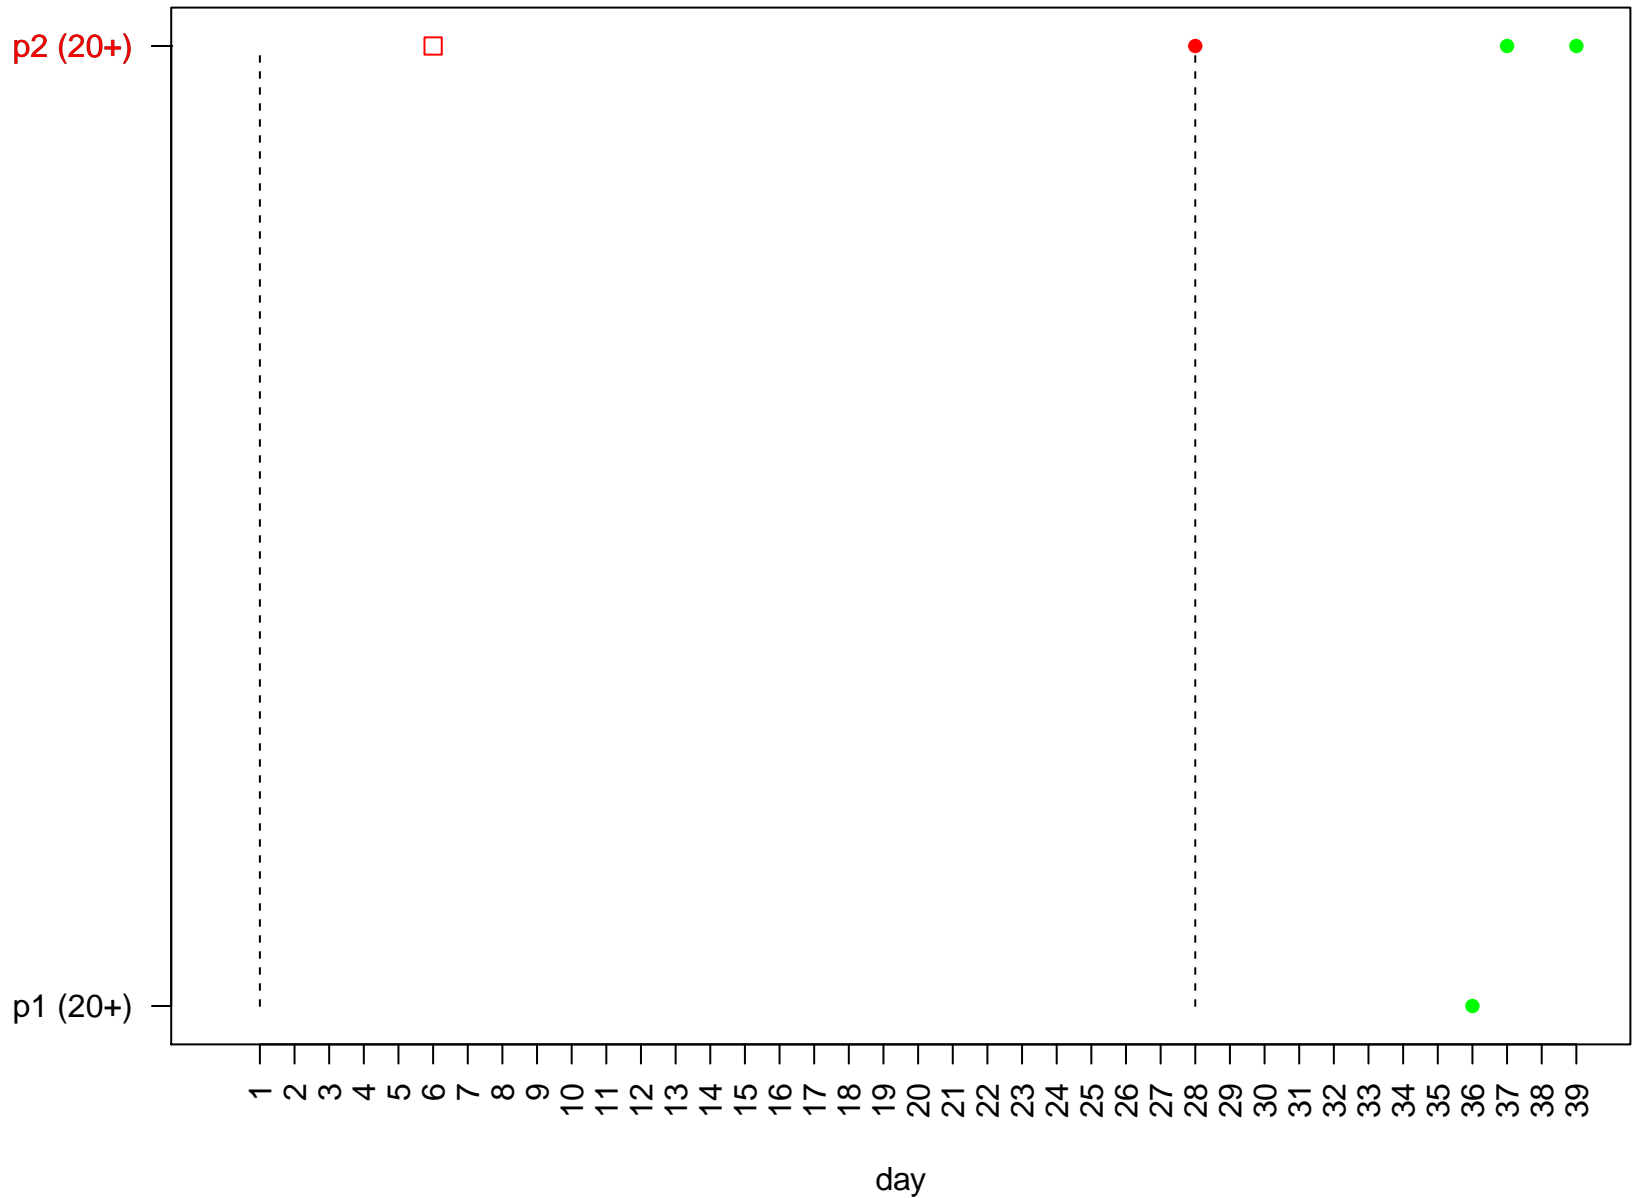

# Household 266

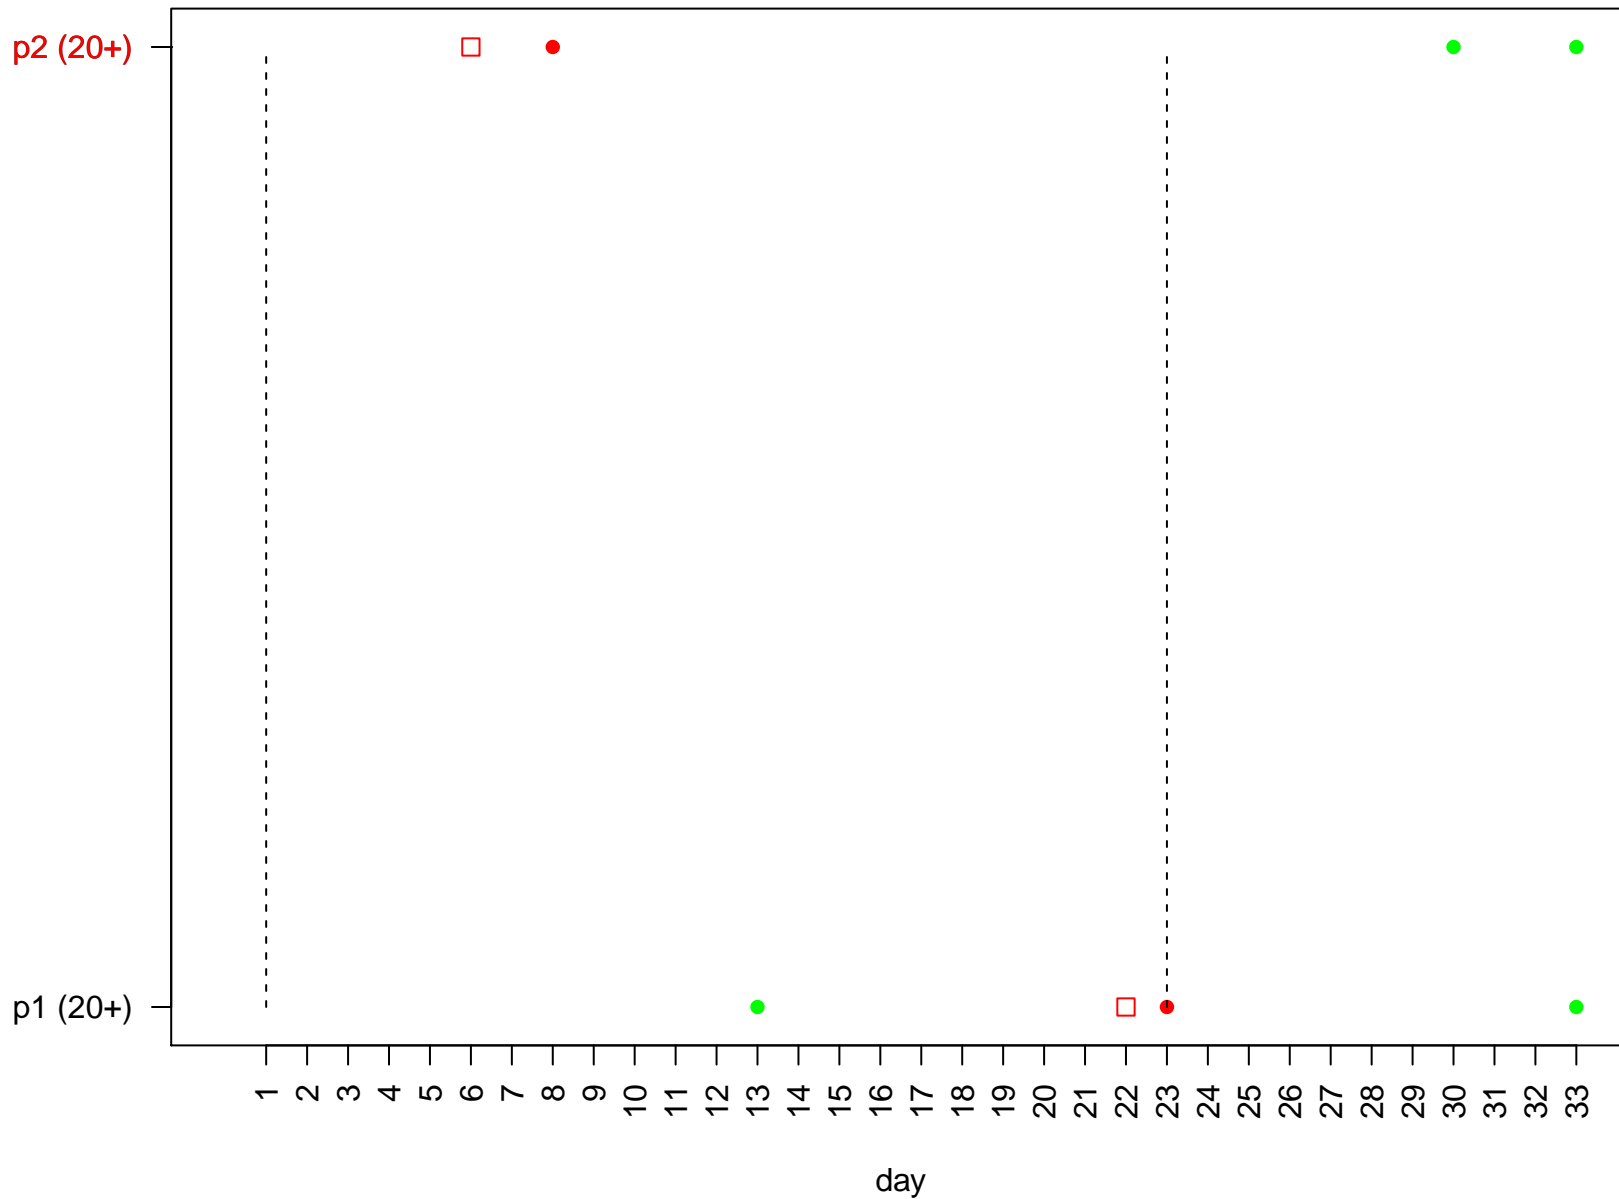

# Household 267

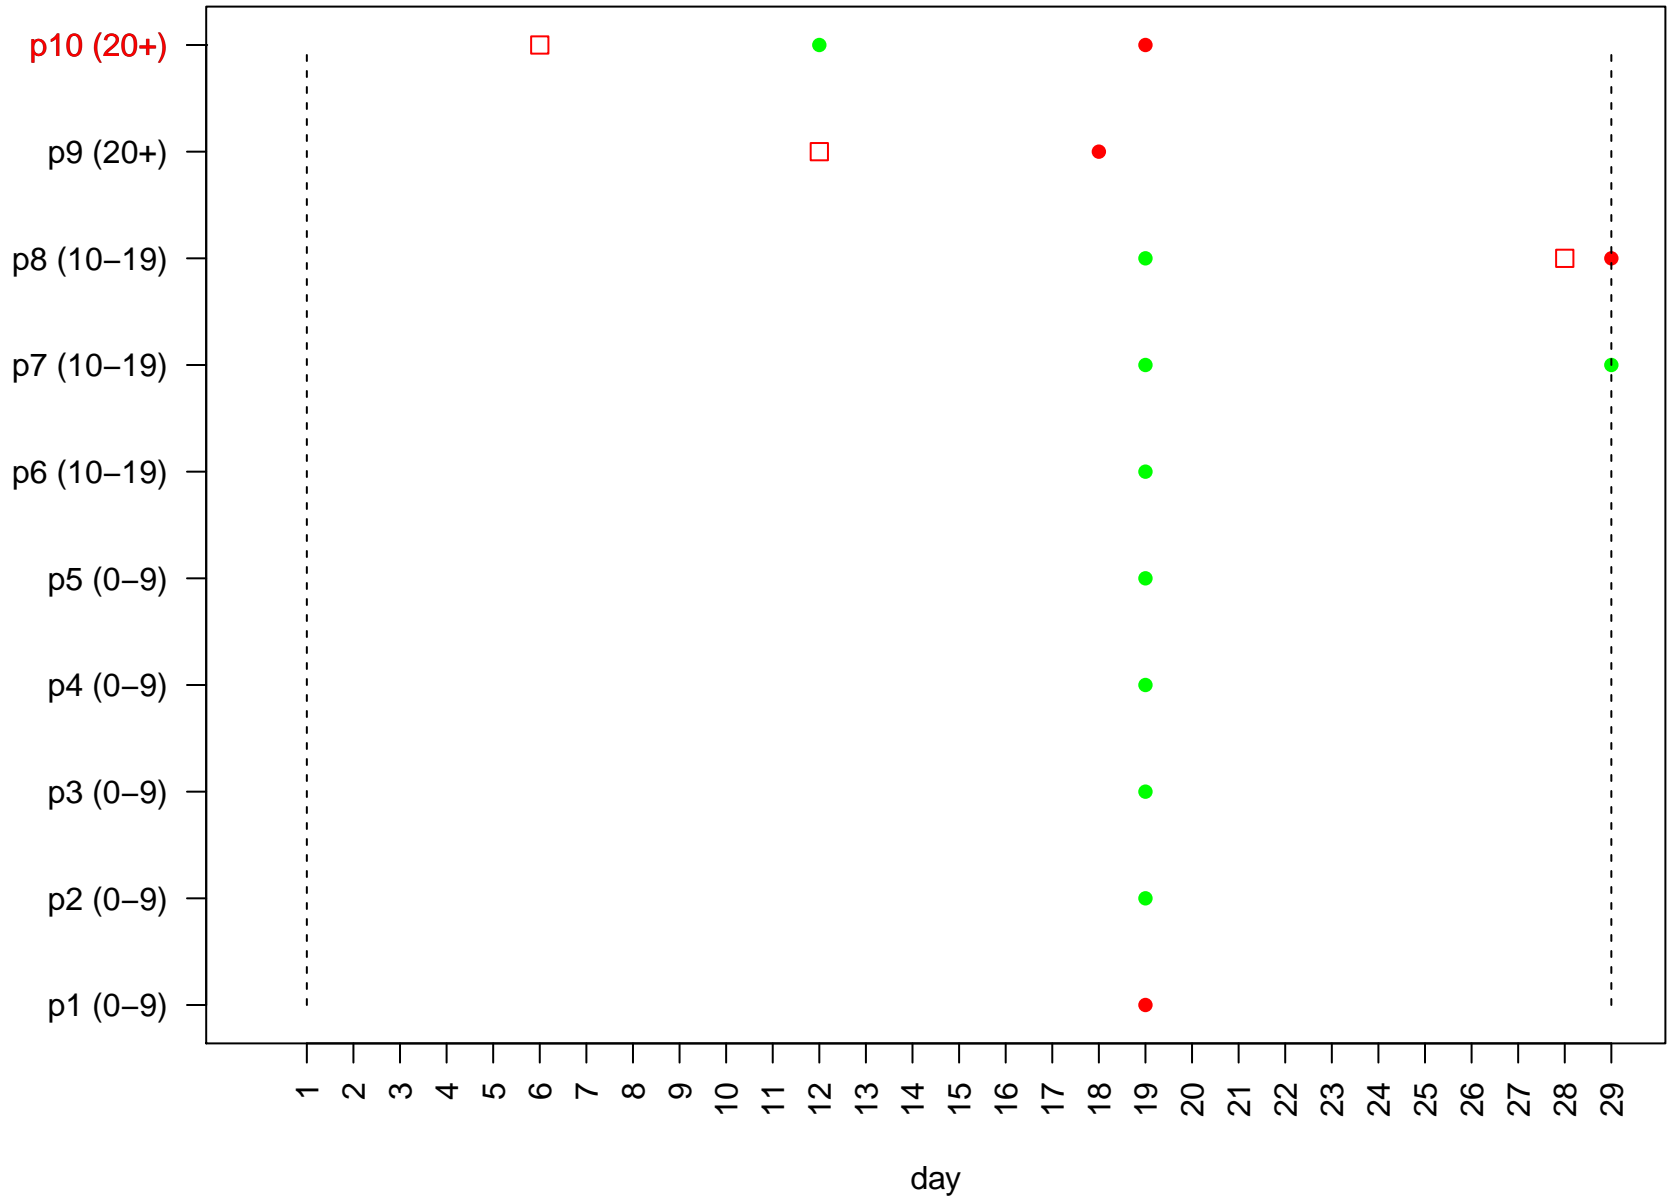

# Household 268

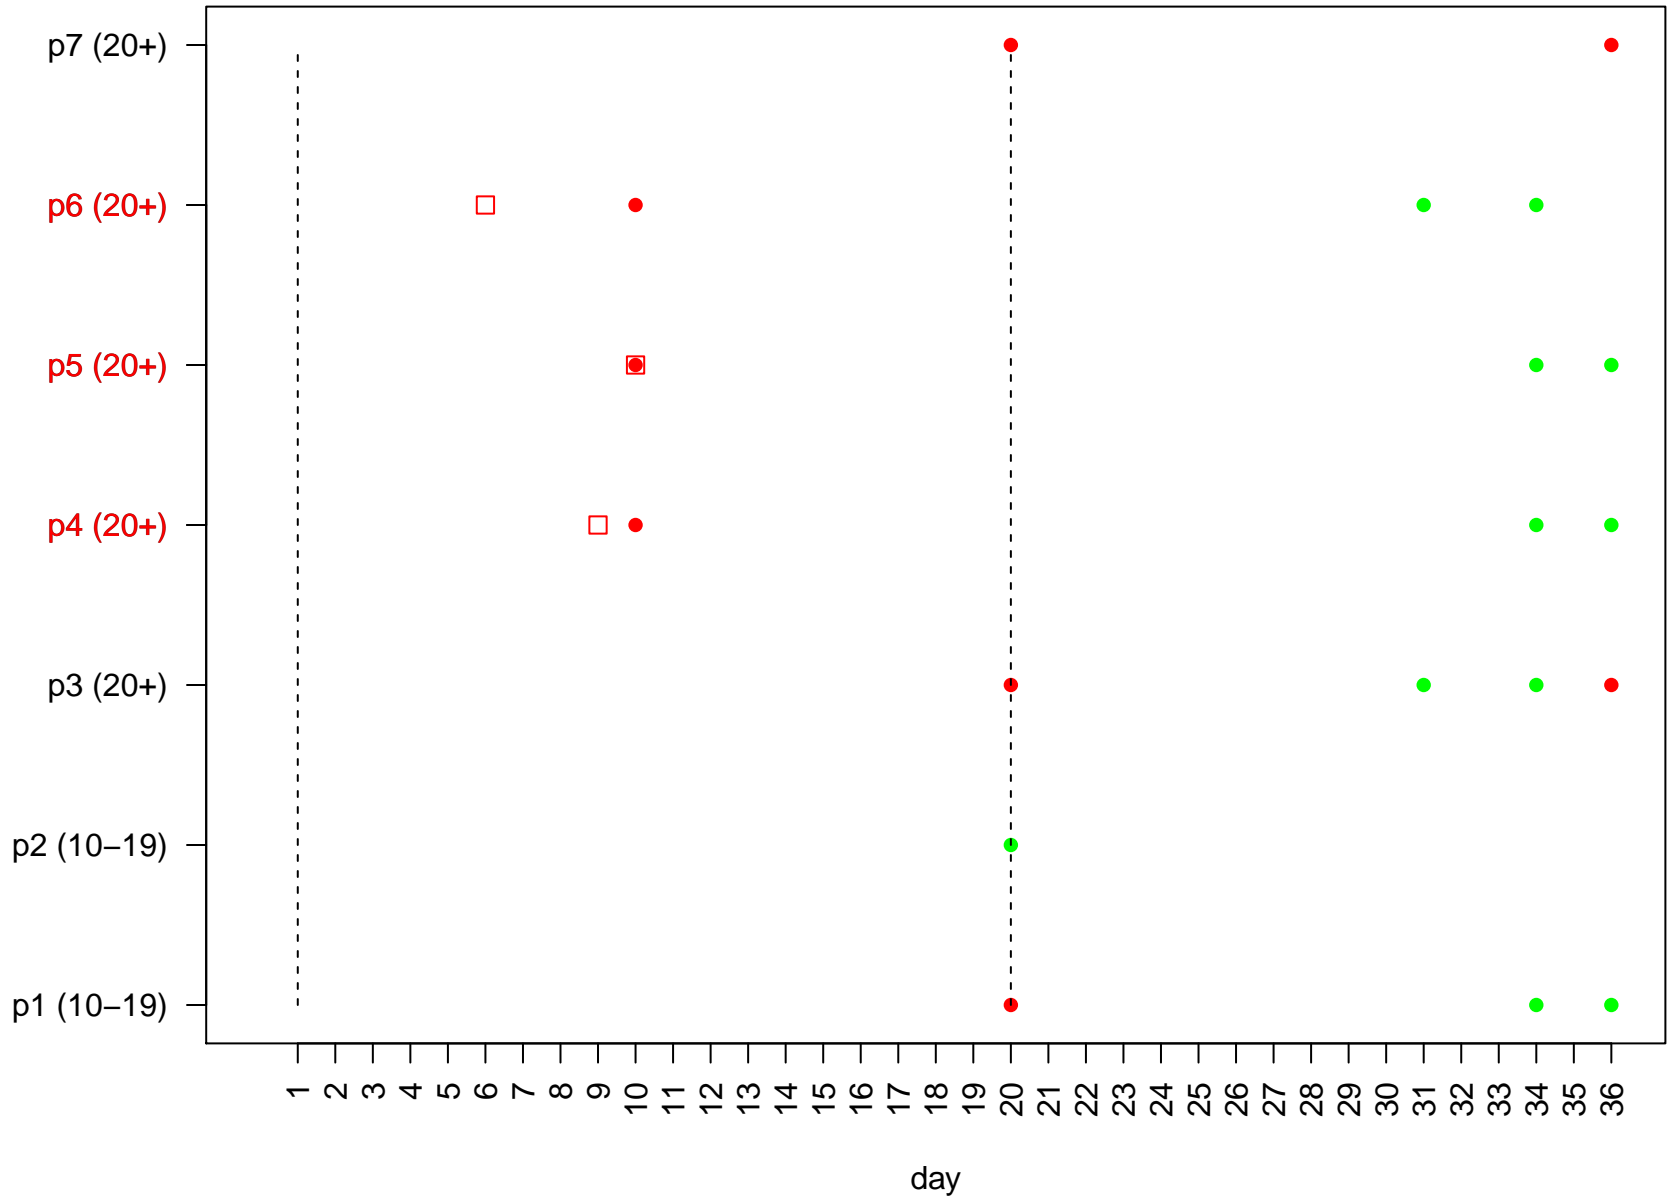

# Household 269

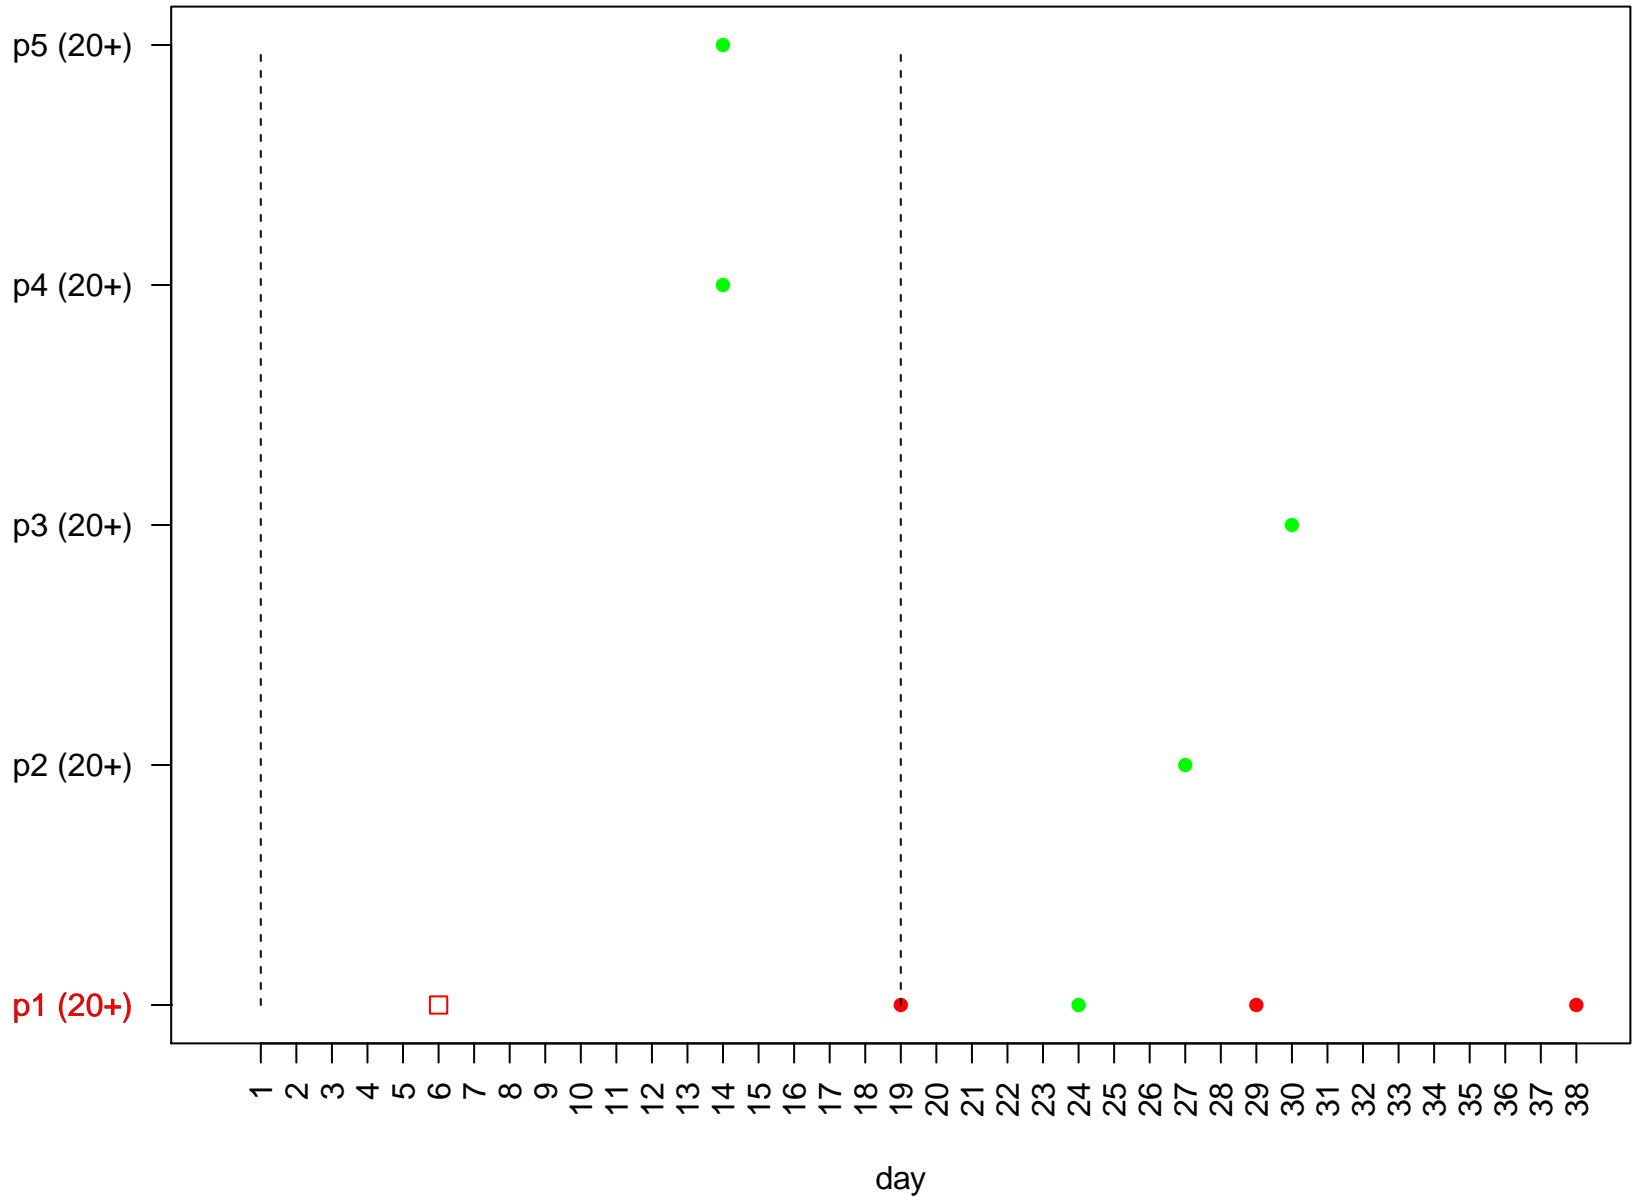

# Household 271

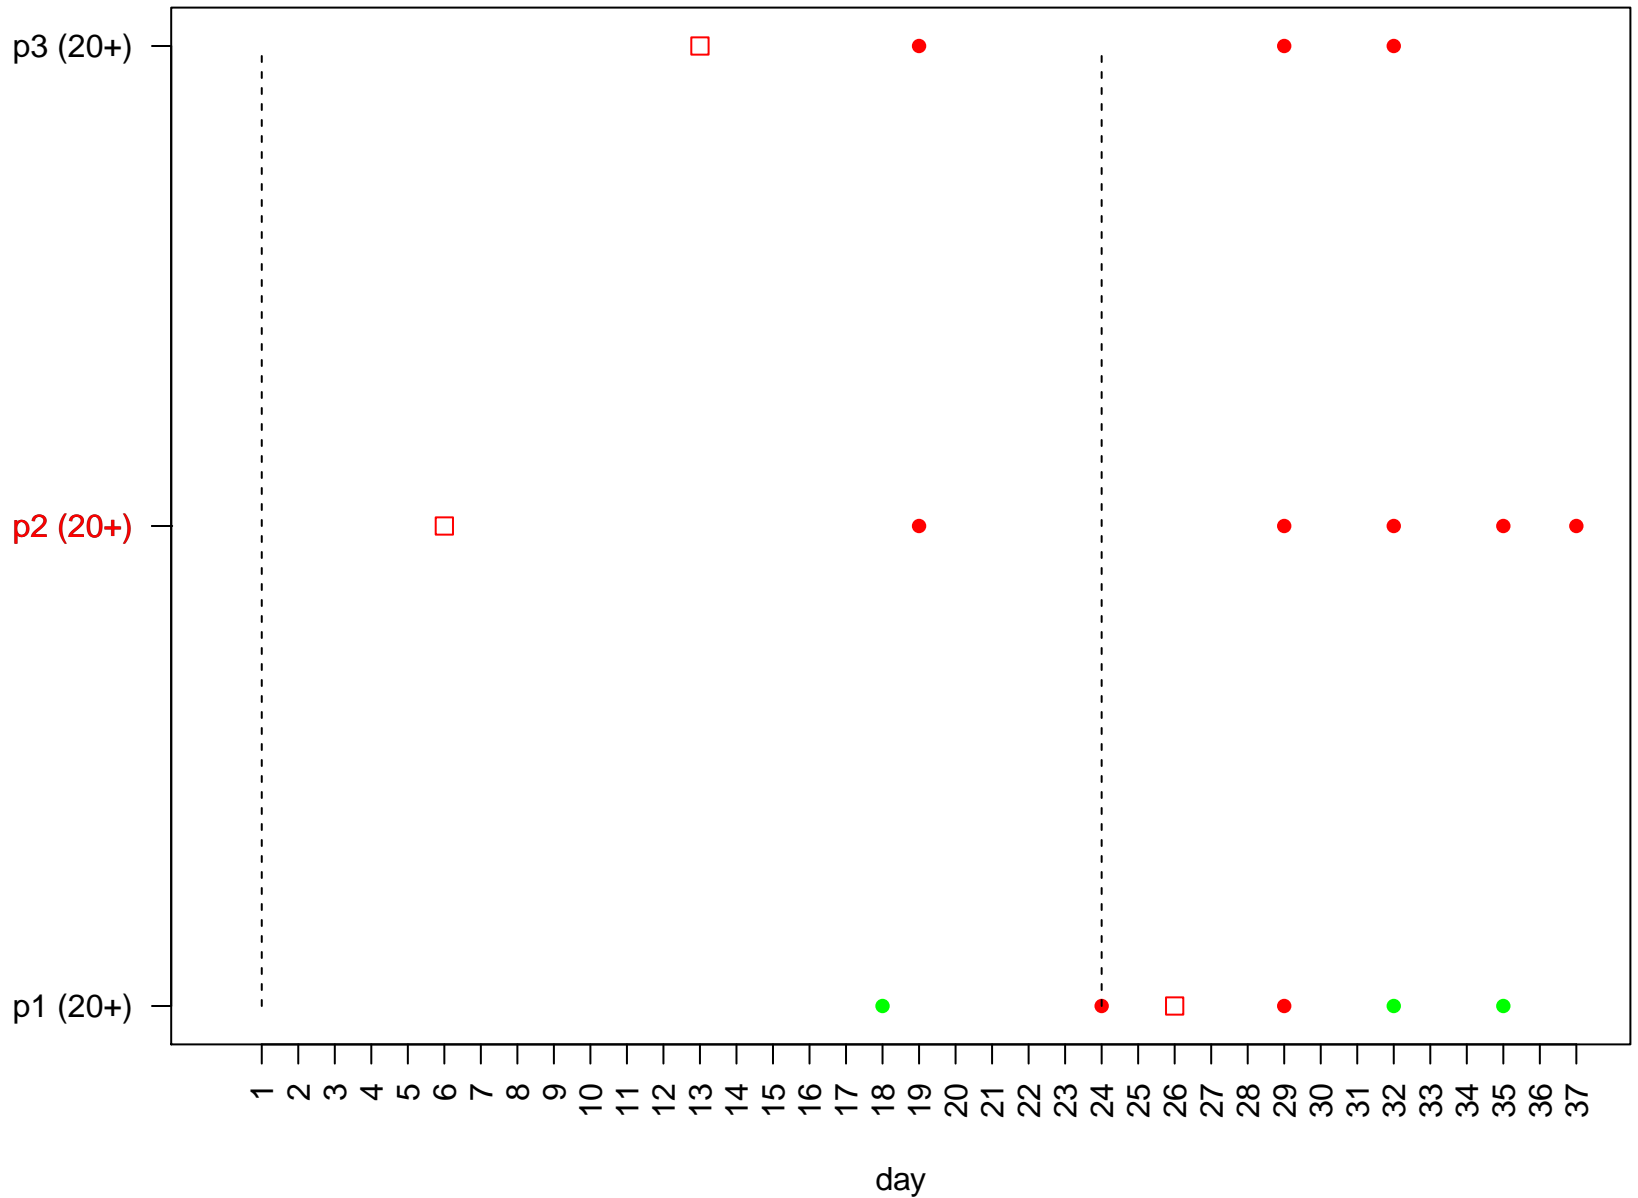



# Household 273

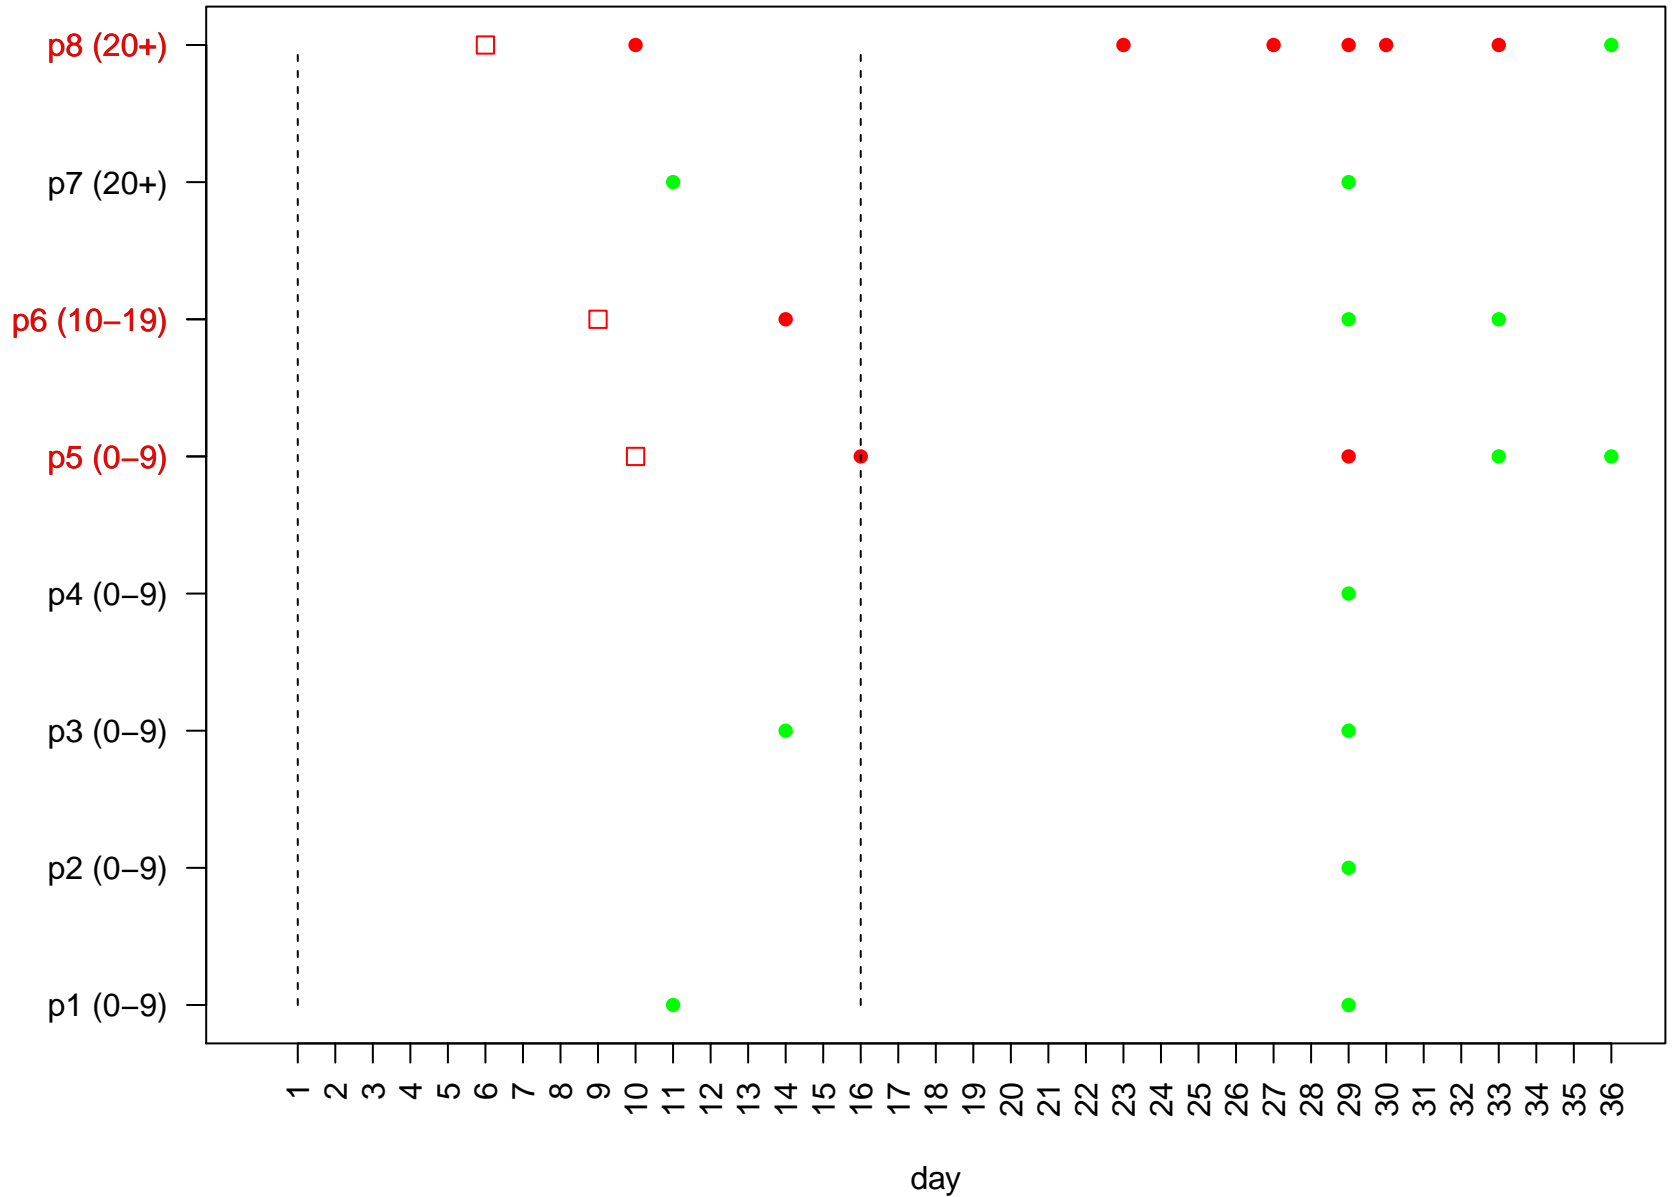





# Household 275

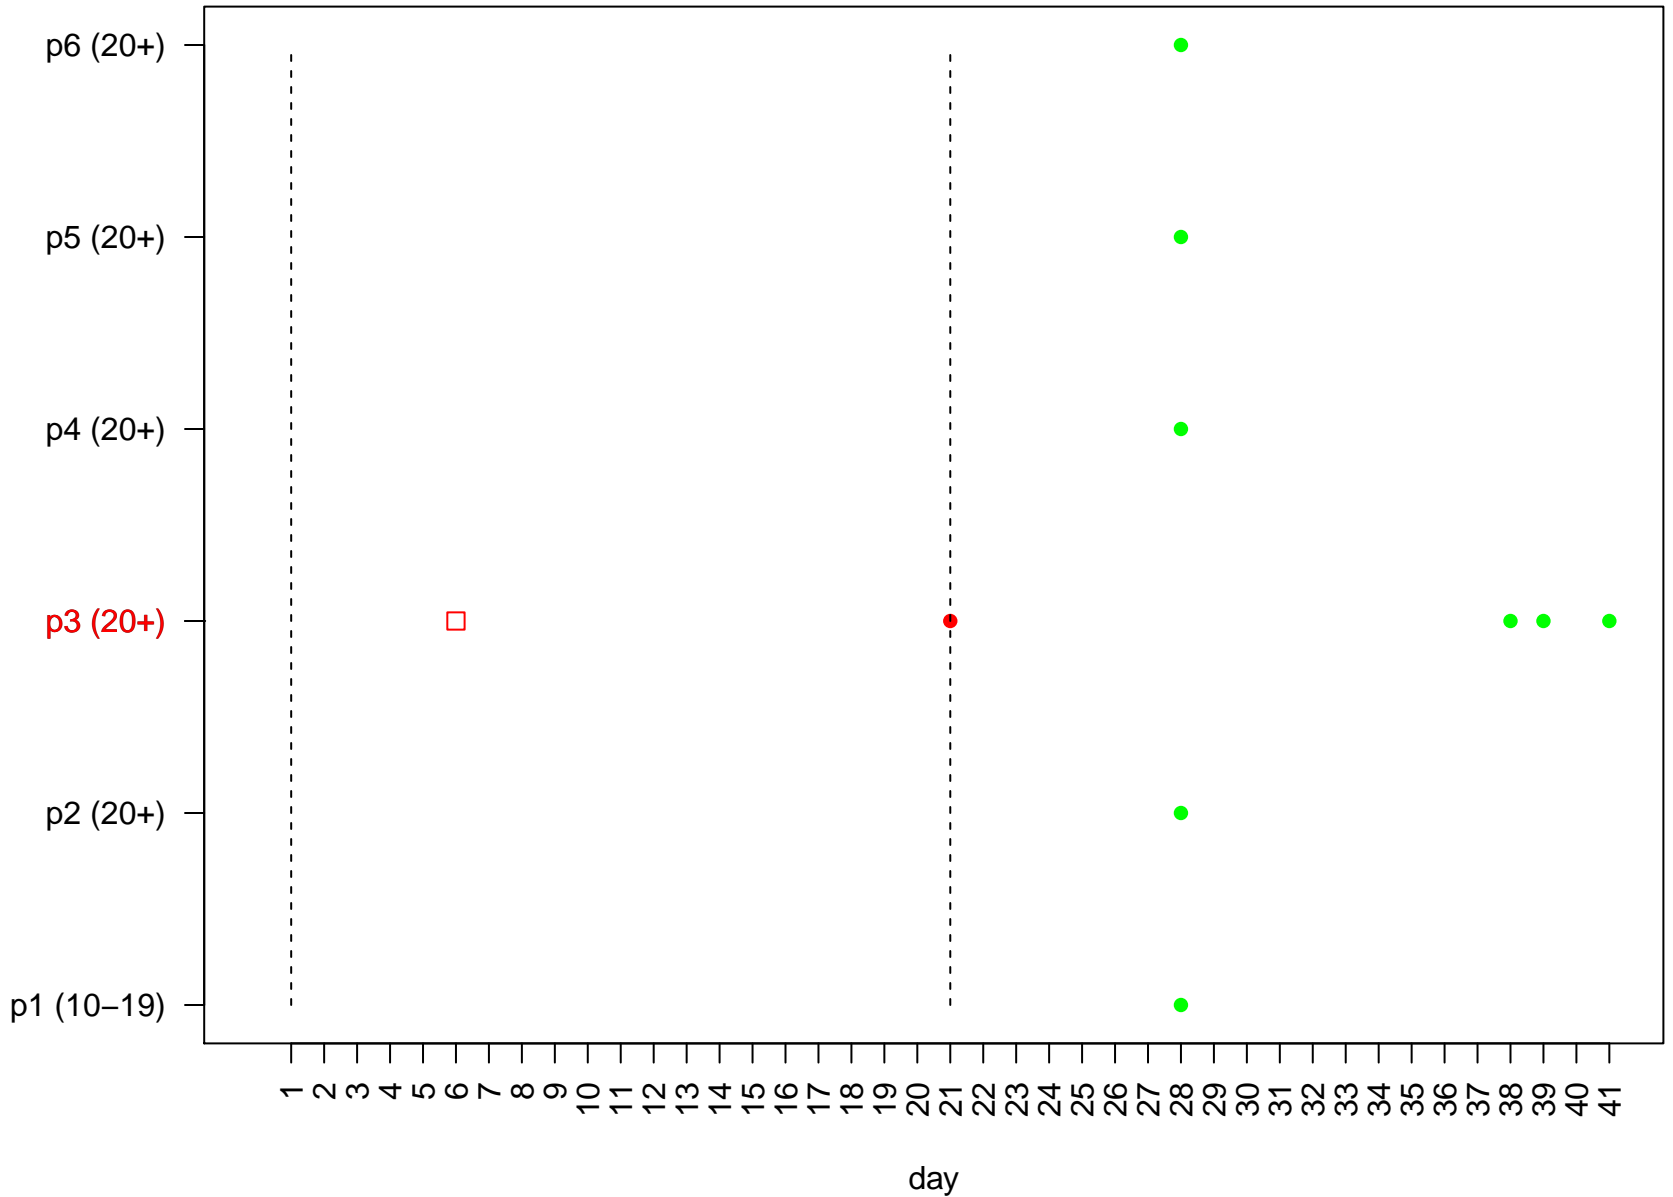

# Household 276

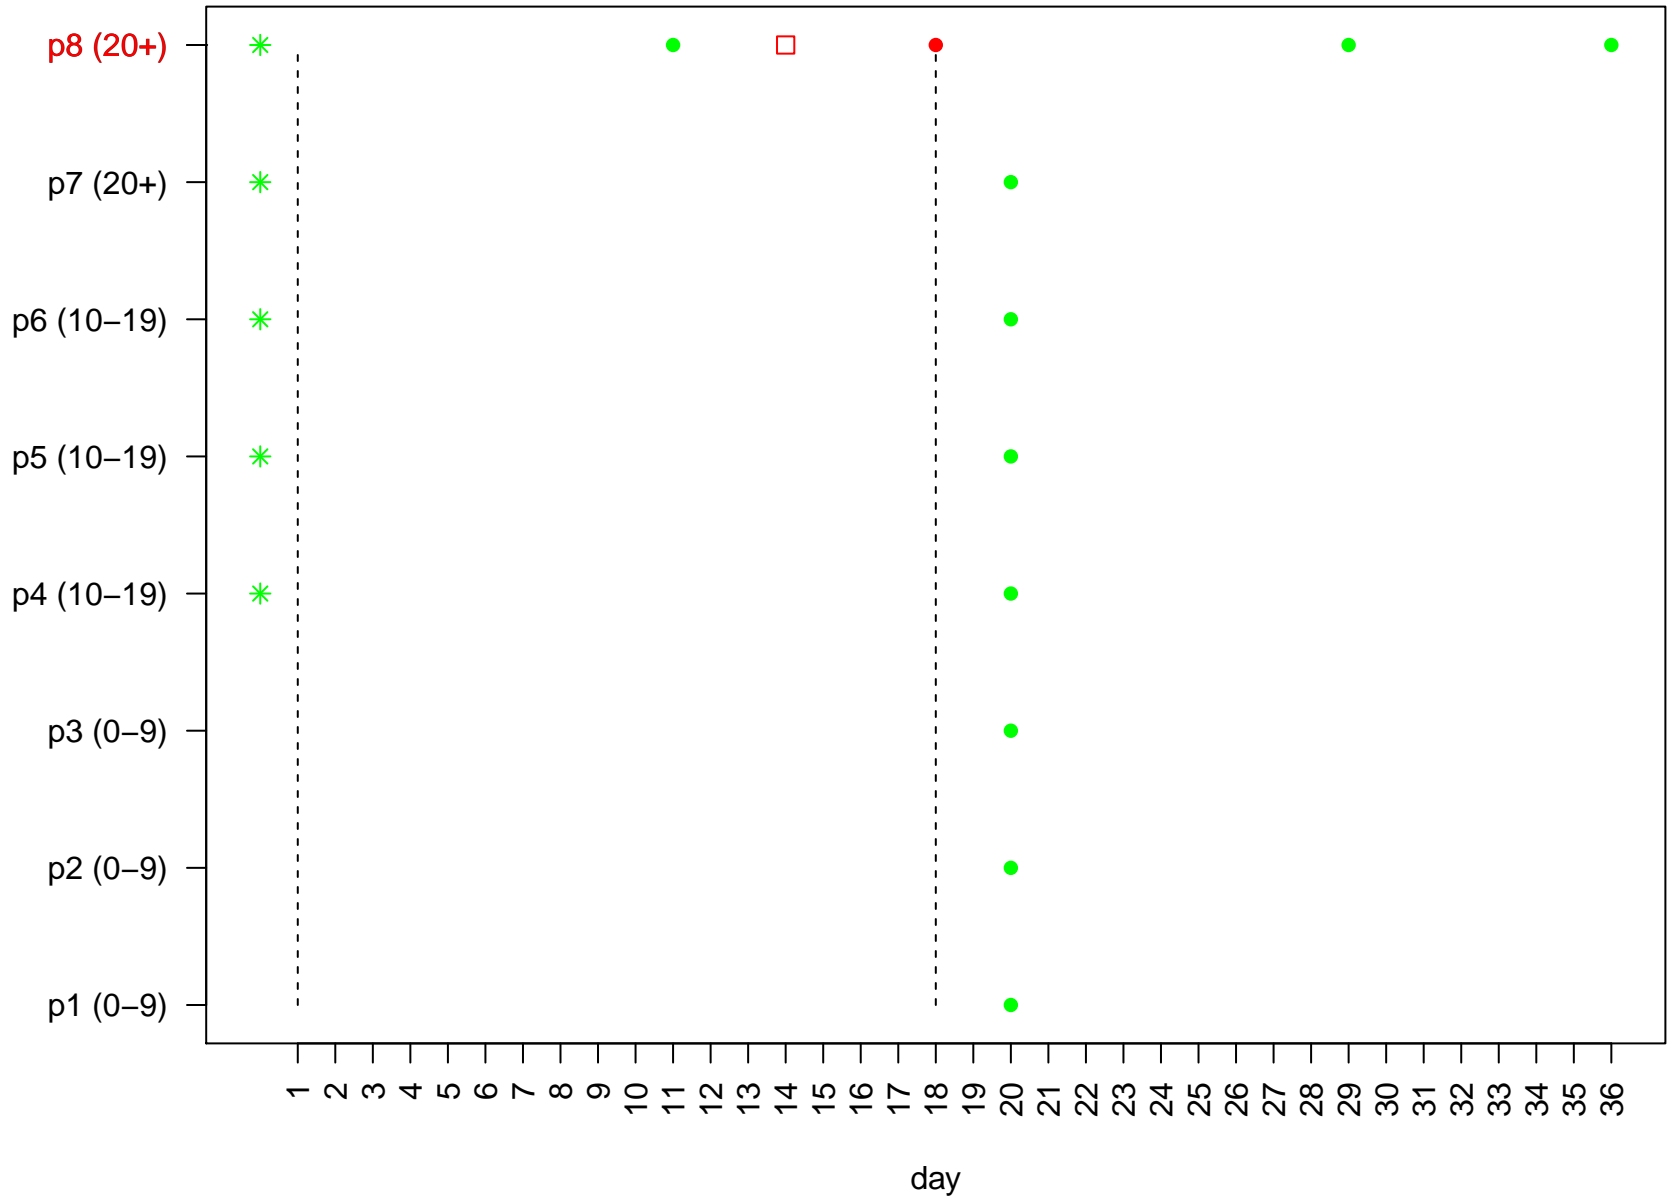

# Household 277

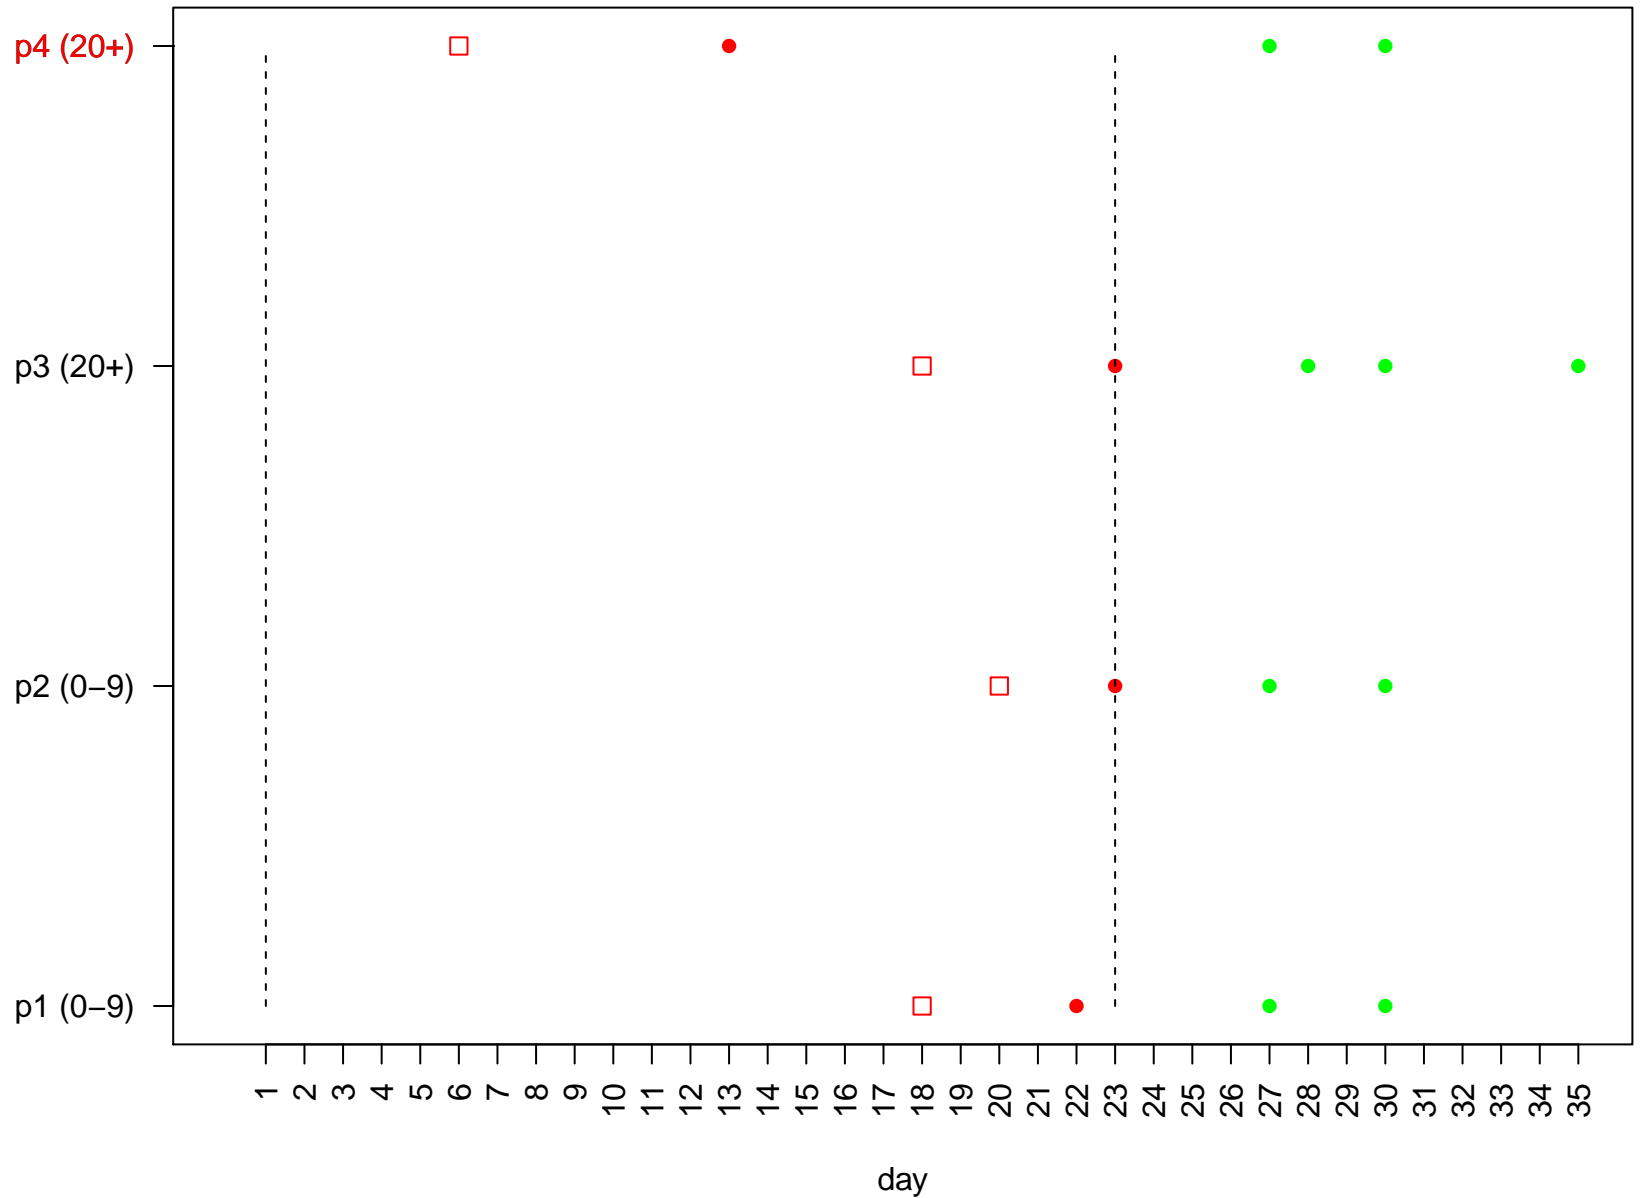

# Household 278

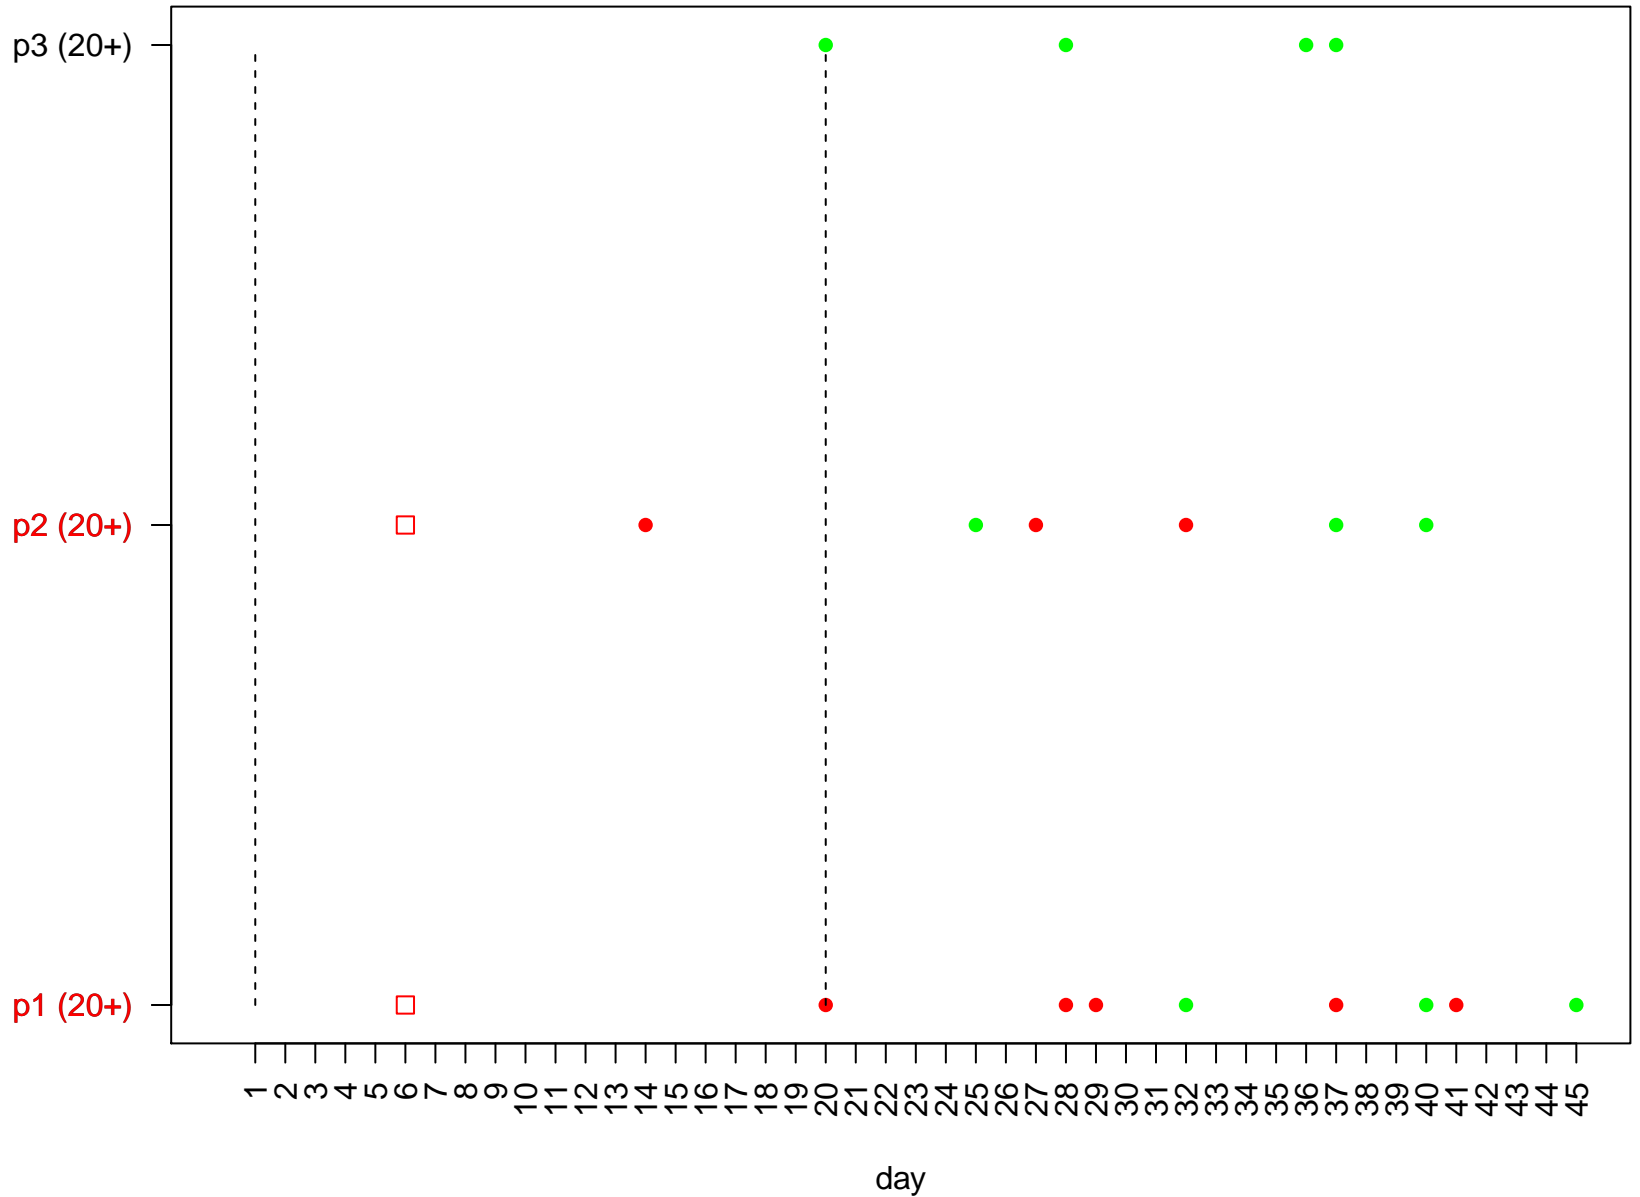

# Household 279

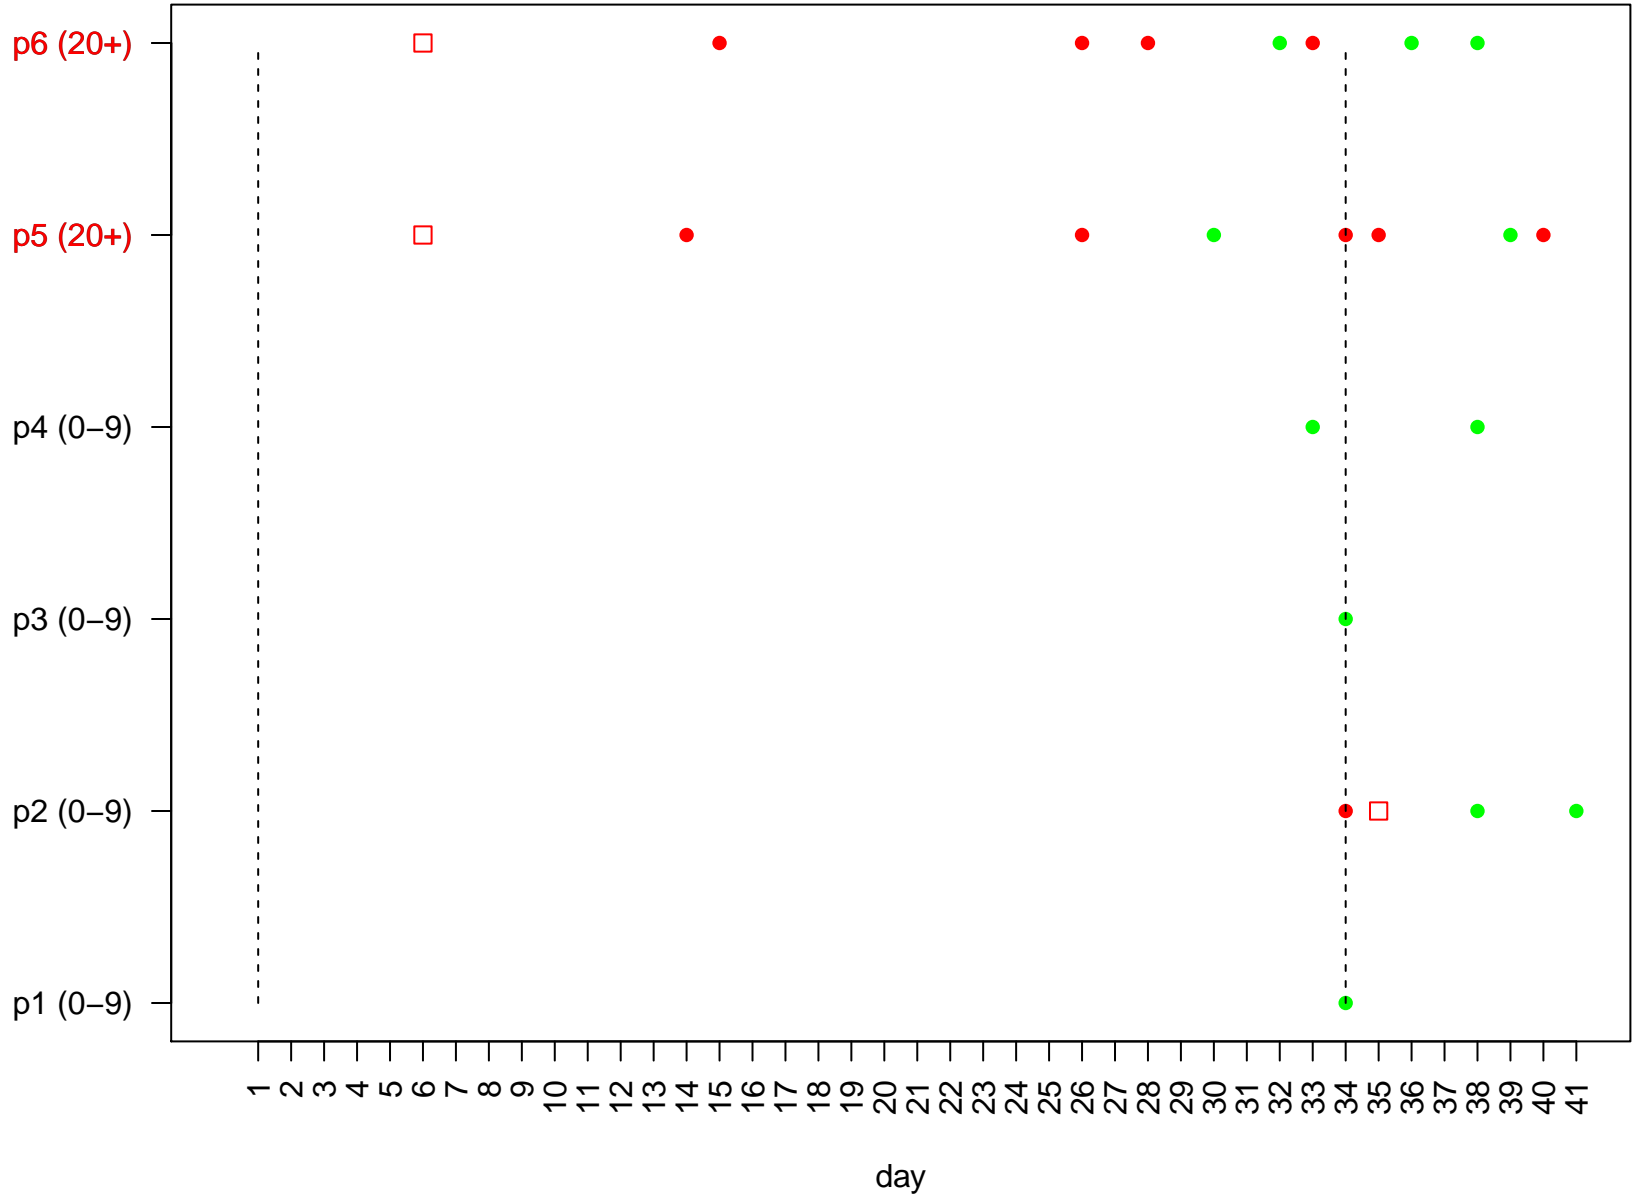

# Household 280

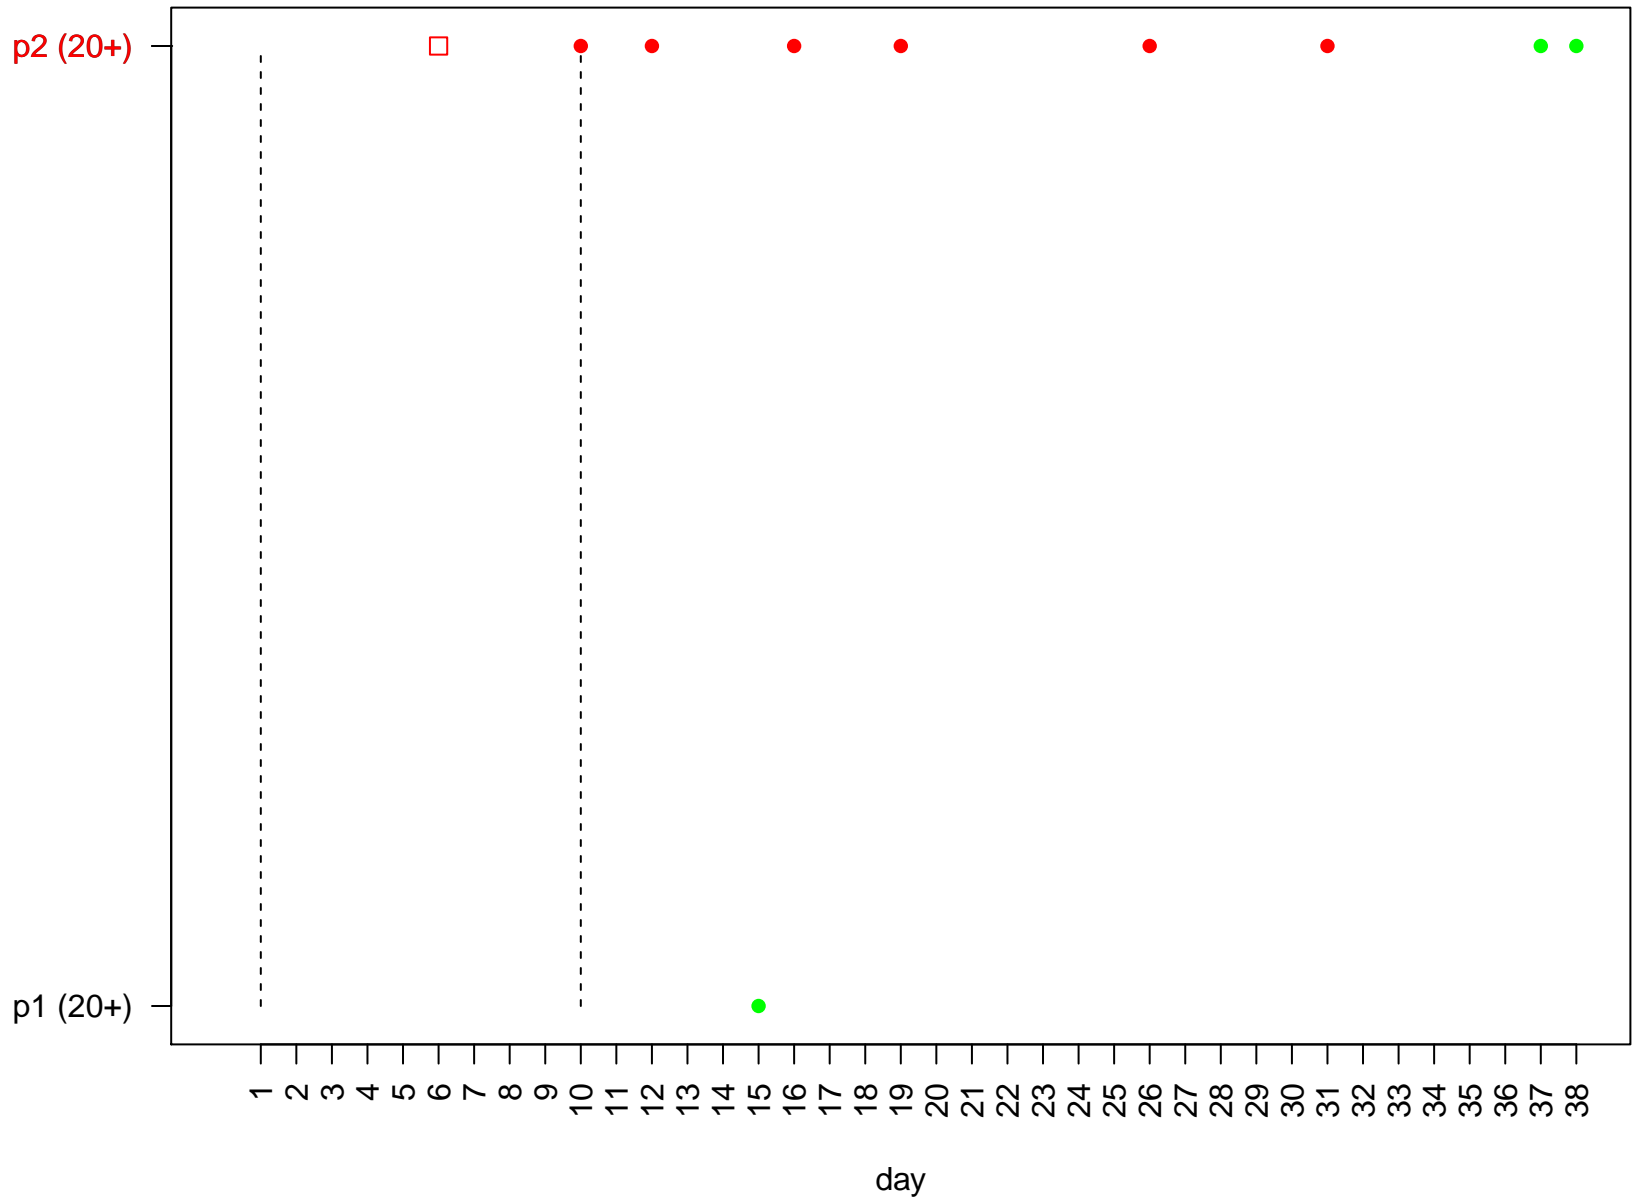

# Household 282

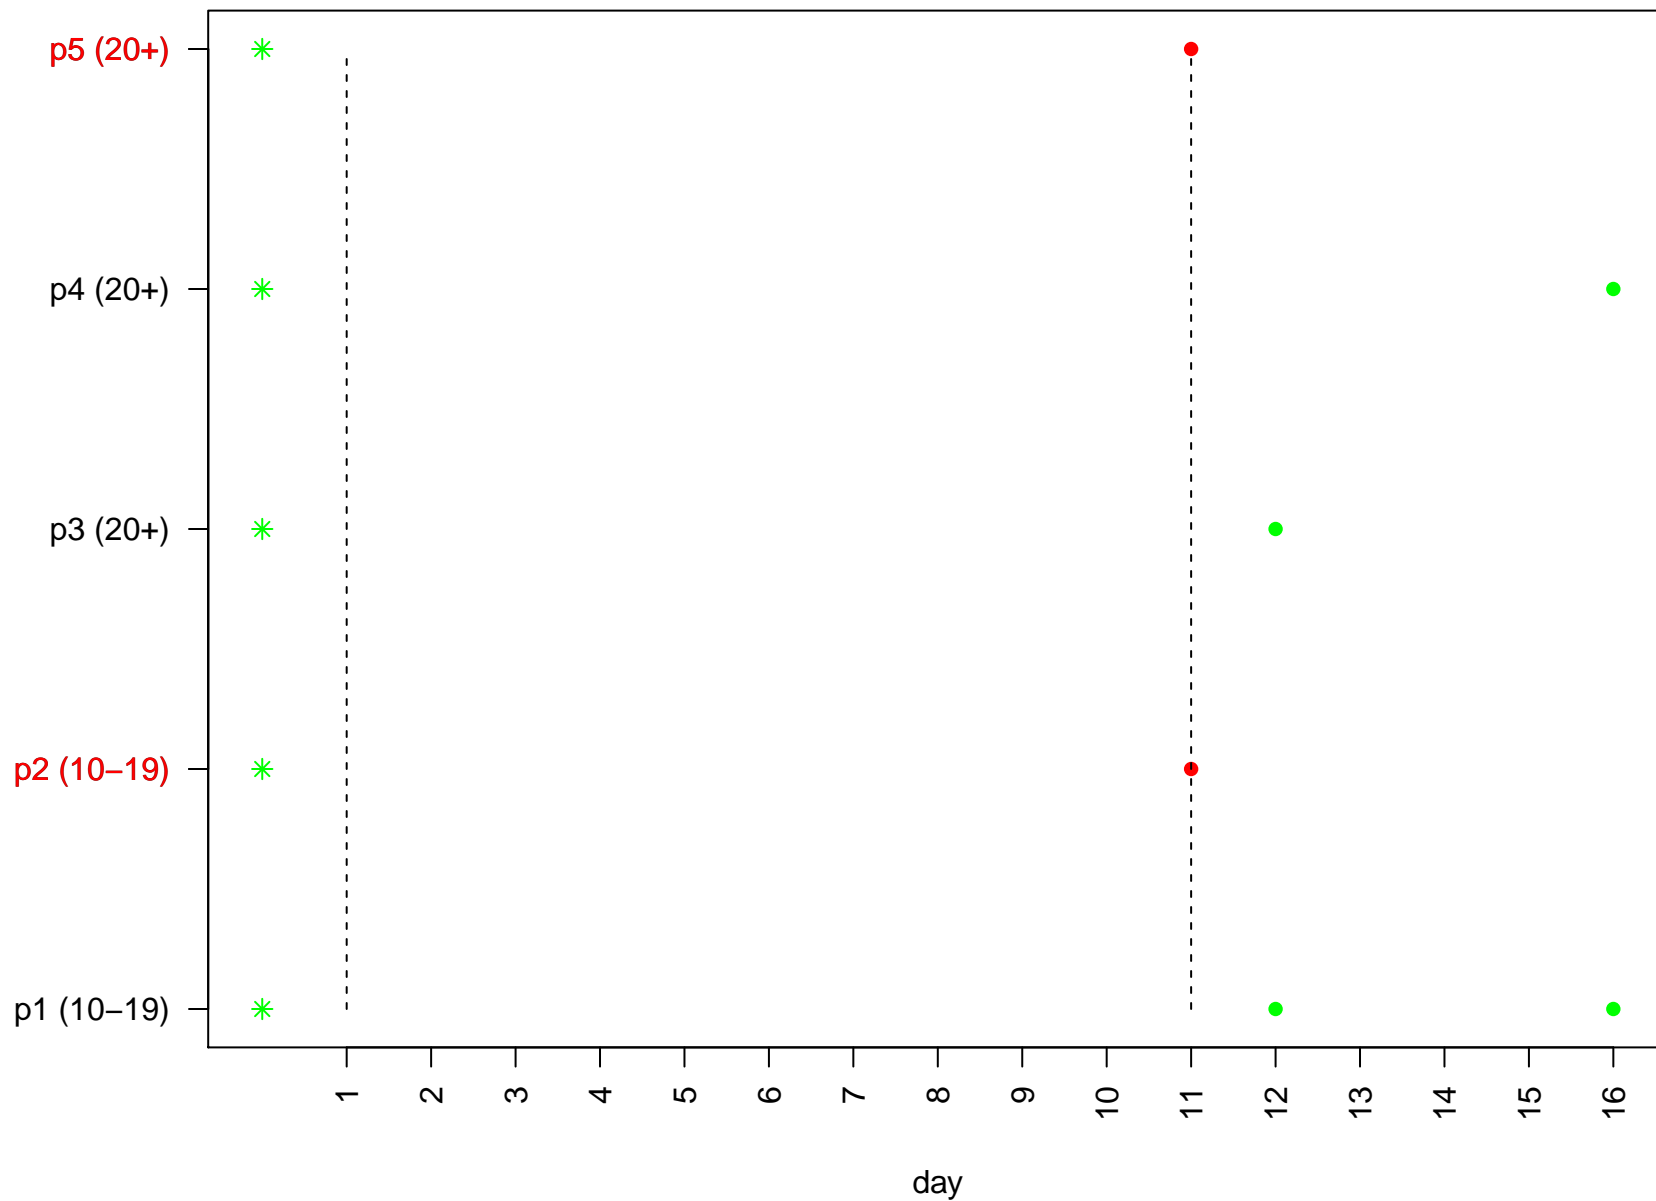





# Household 284

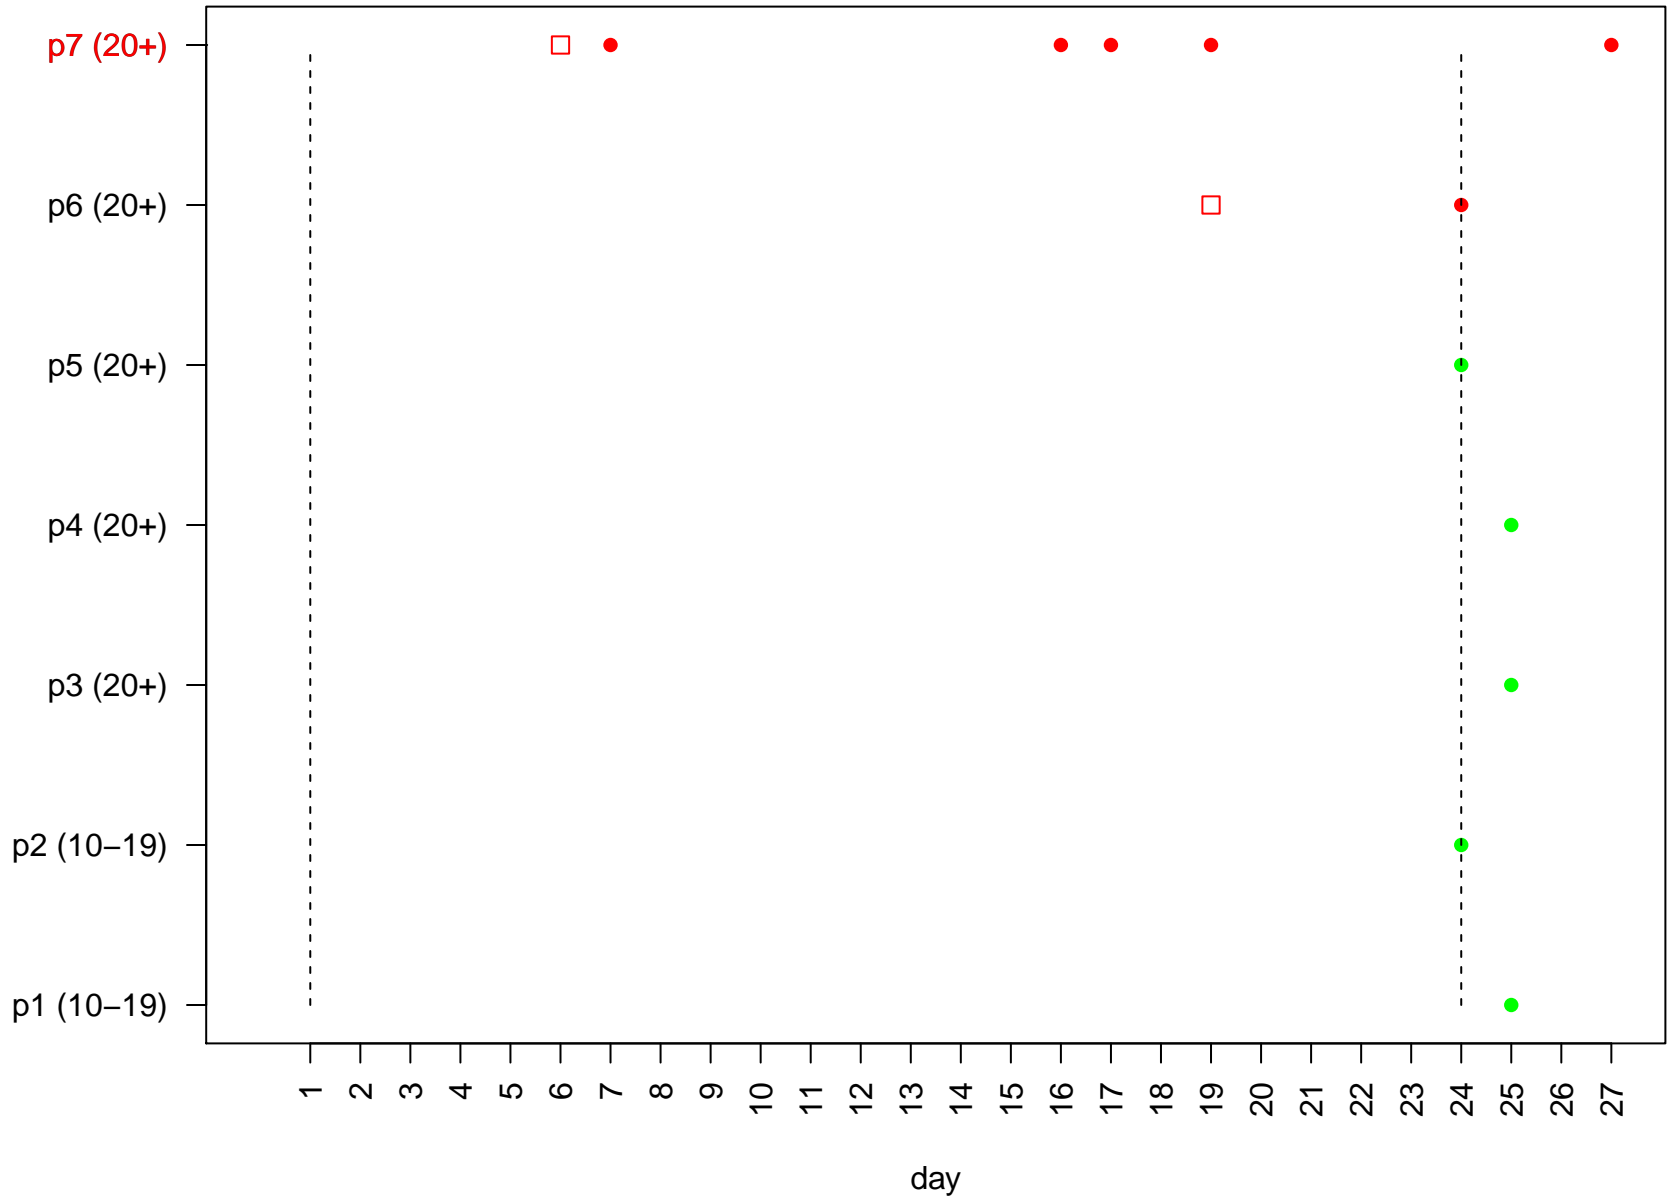

# Household 285

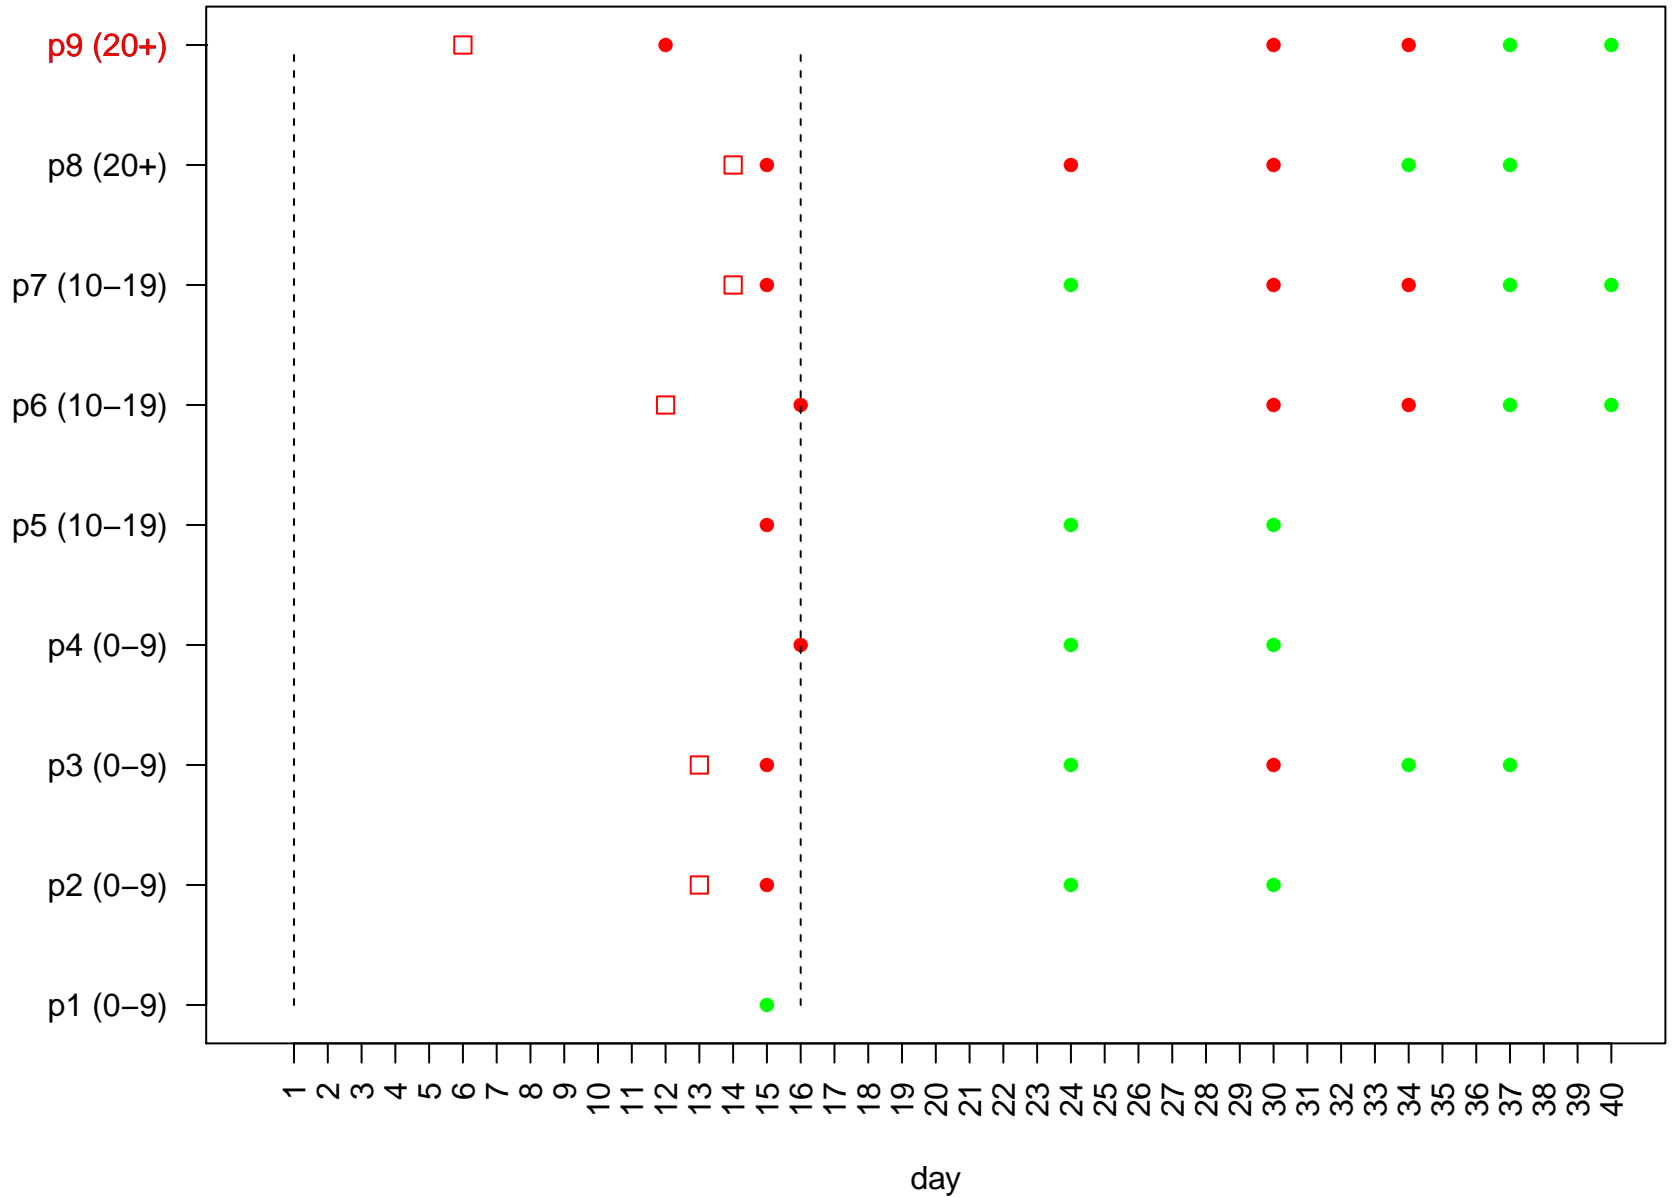

# Household 286

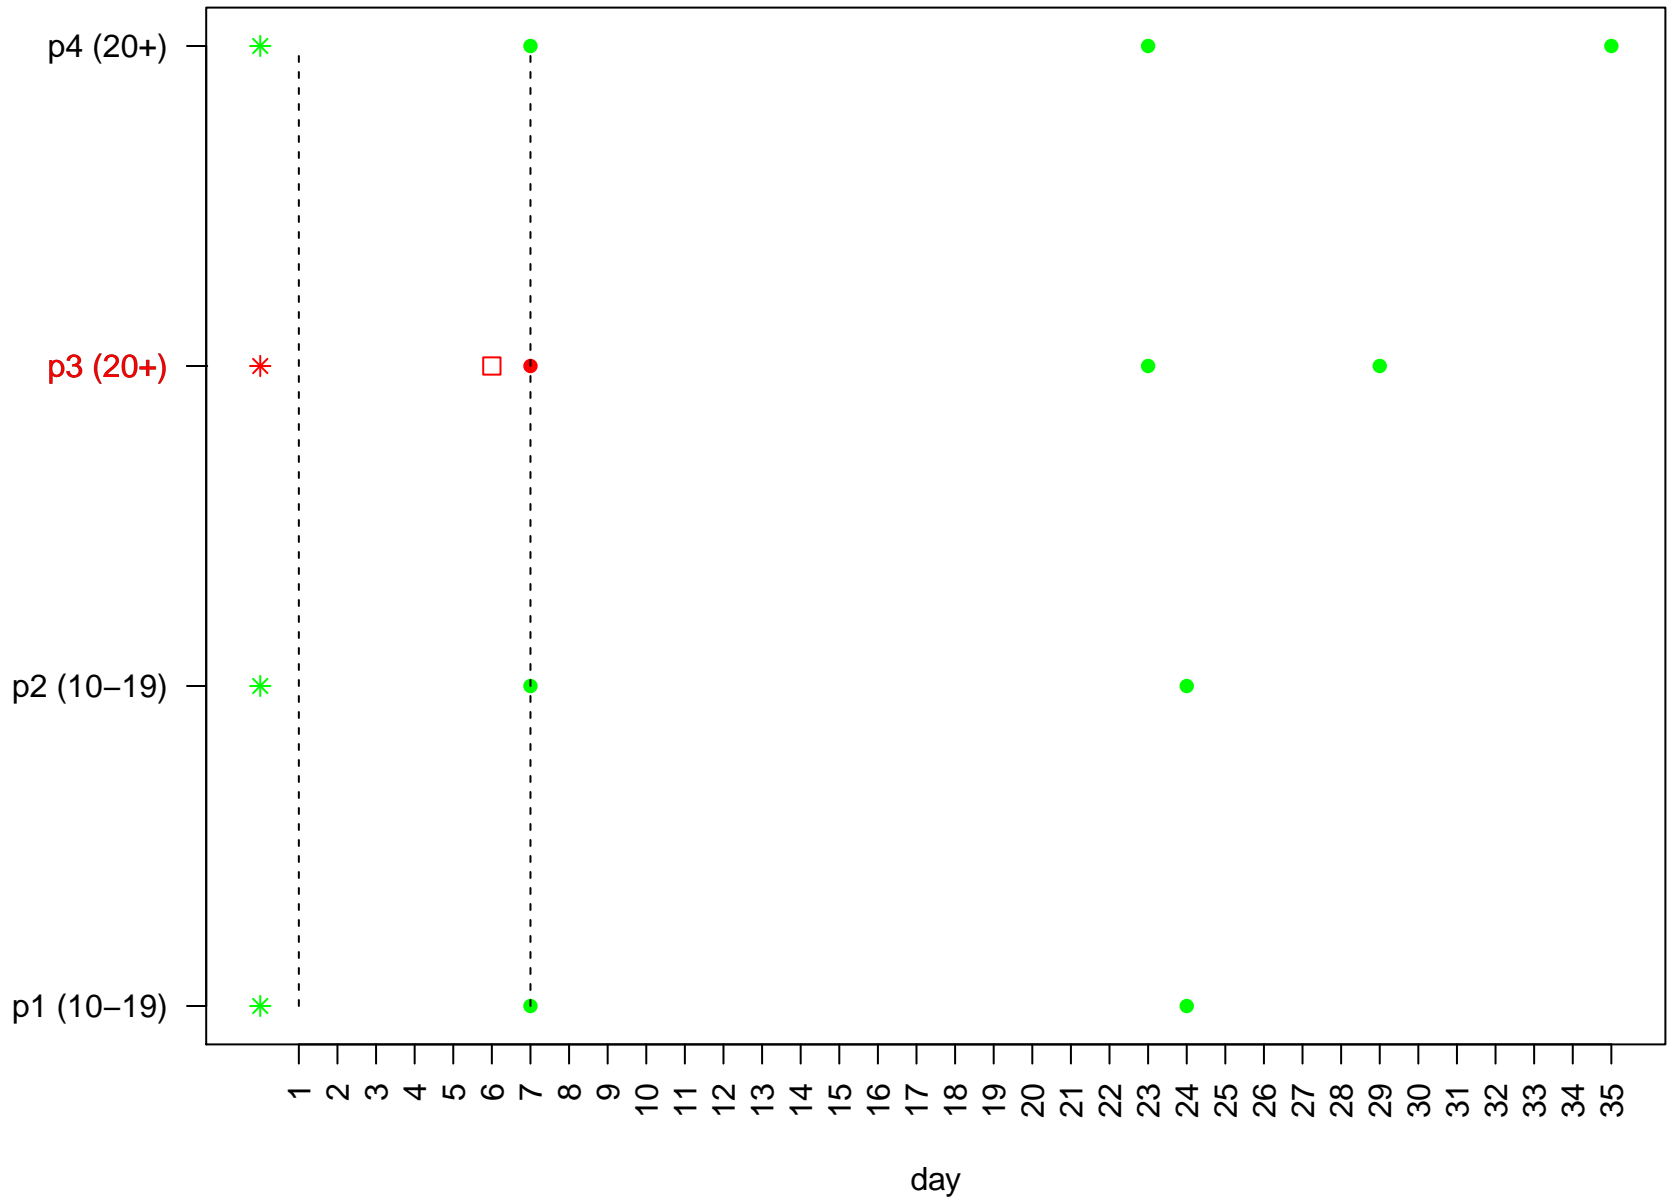

# Household 287

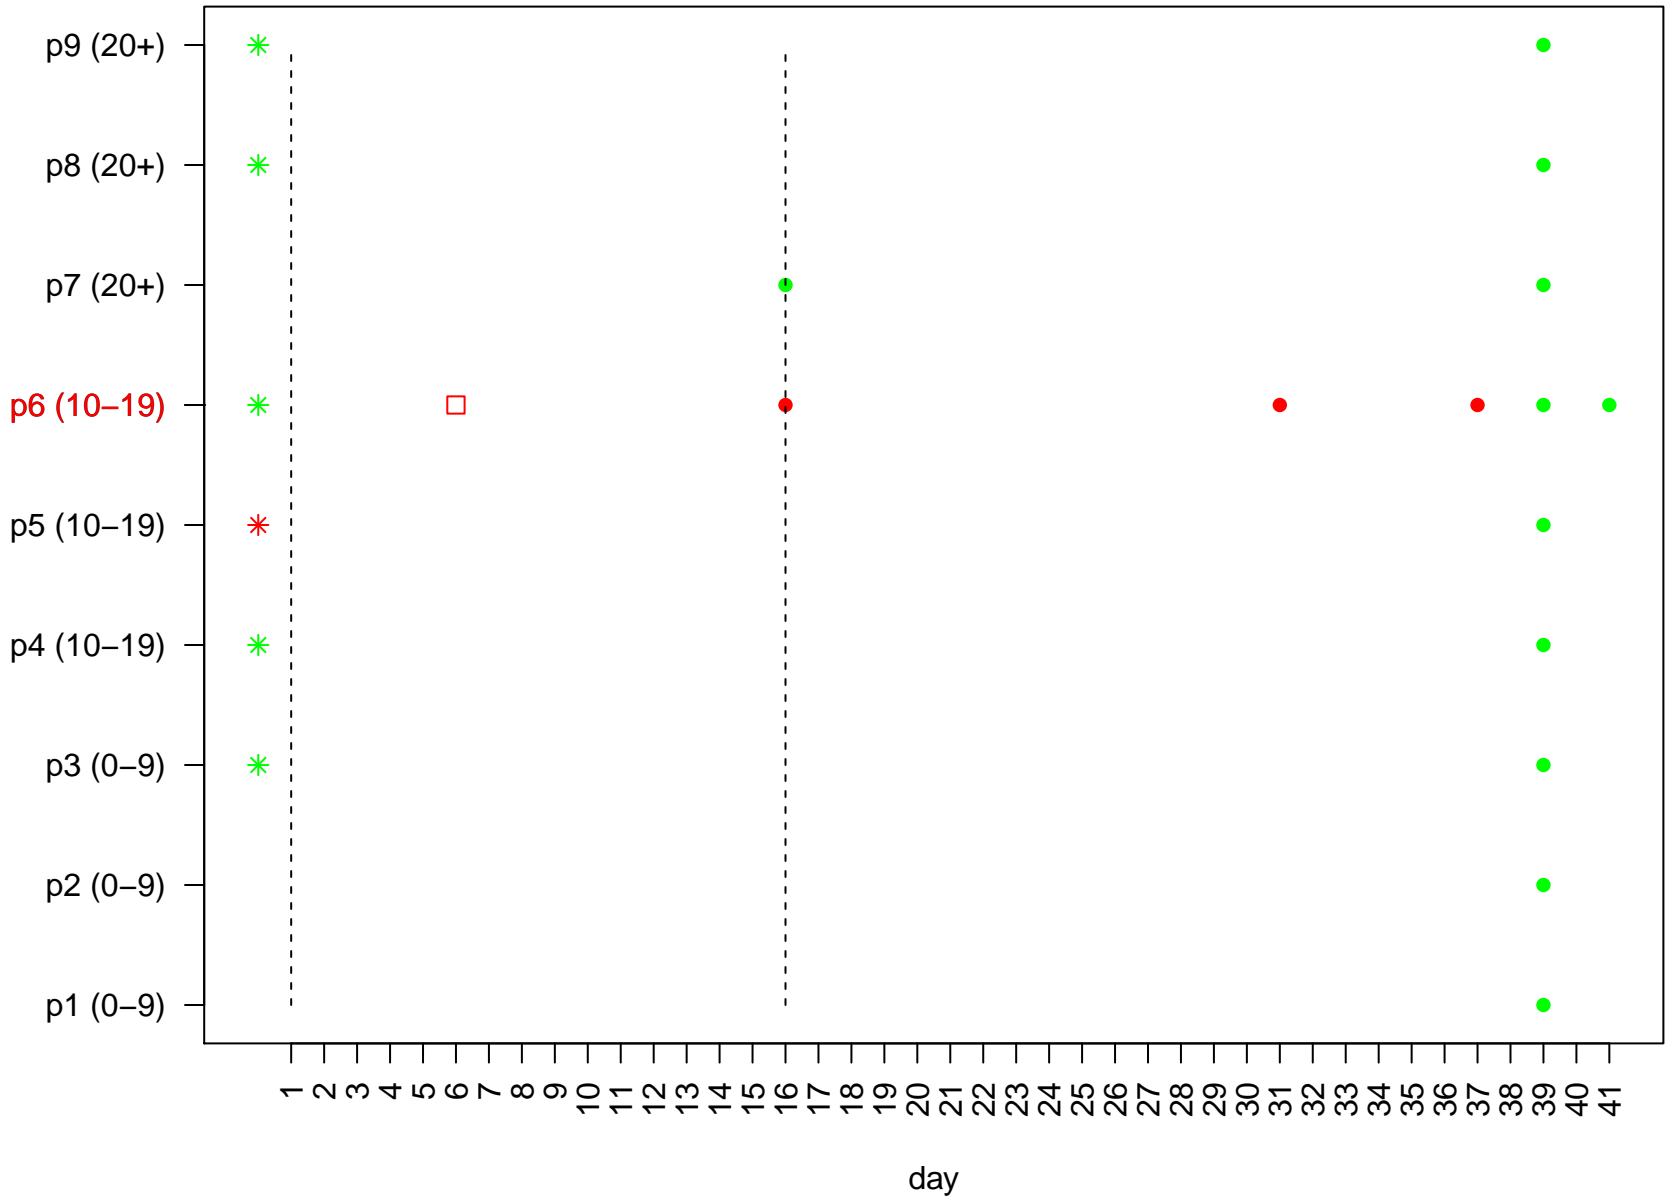

# Household 288

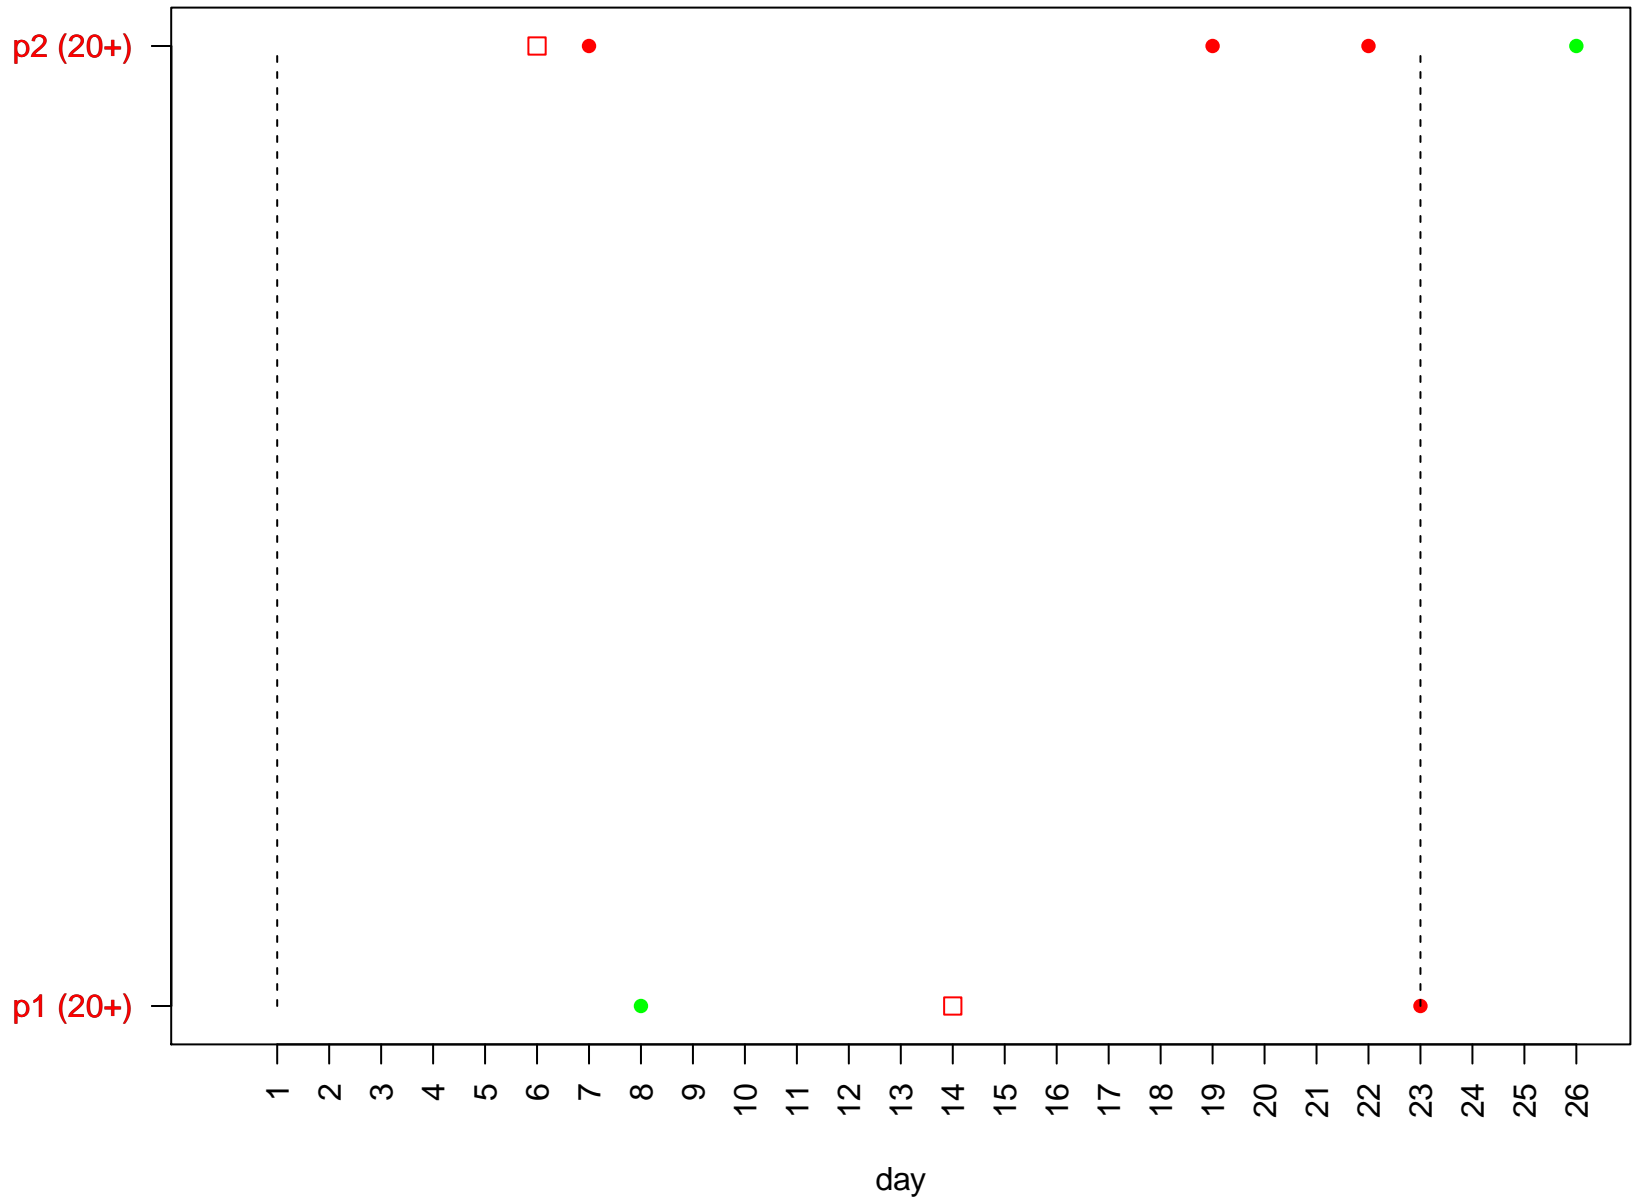



# Household 290

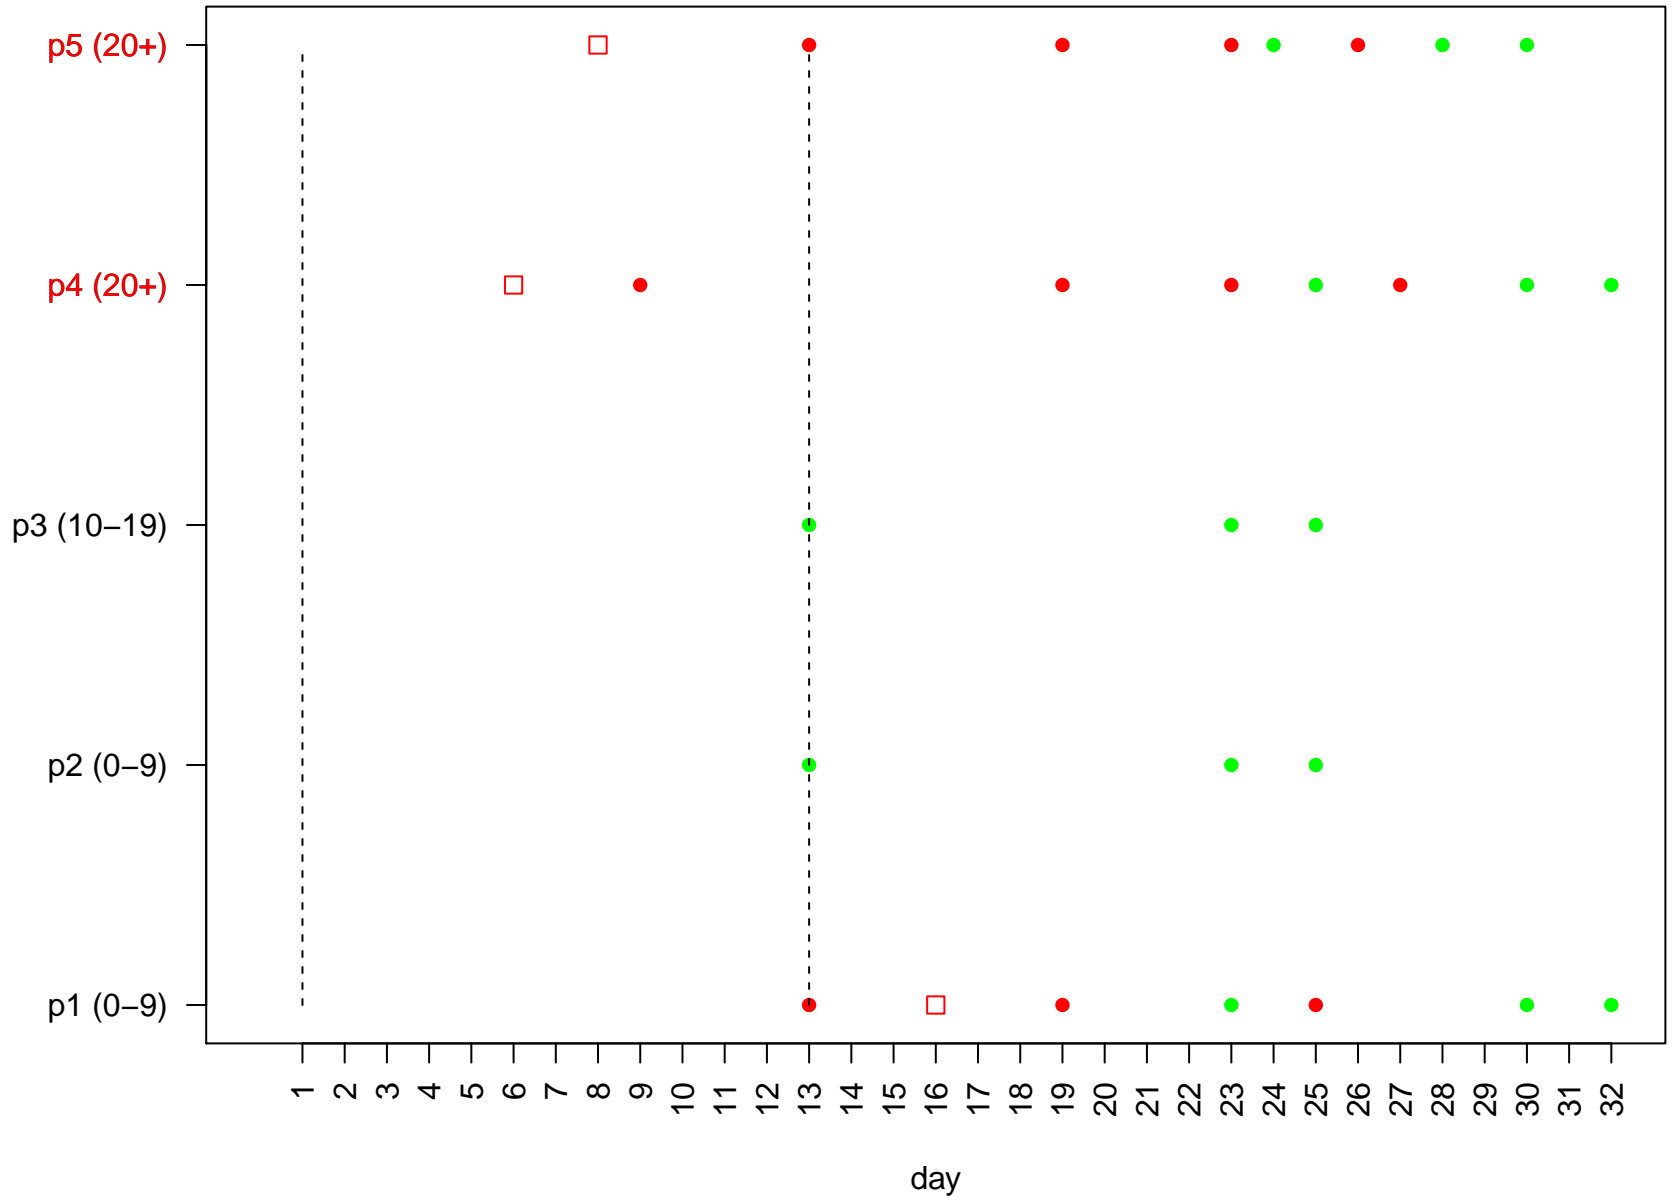



# Household 291

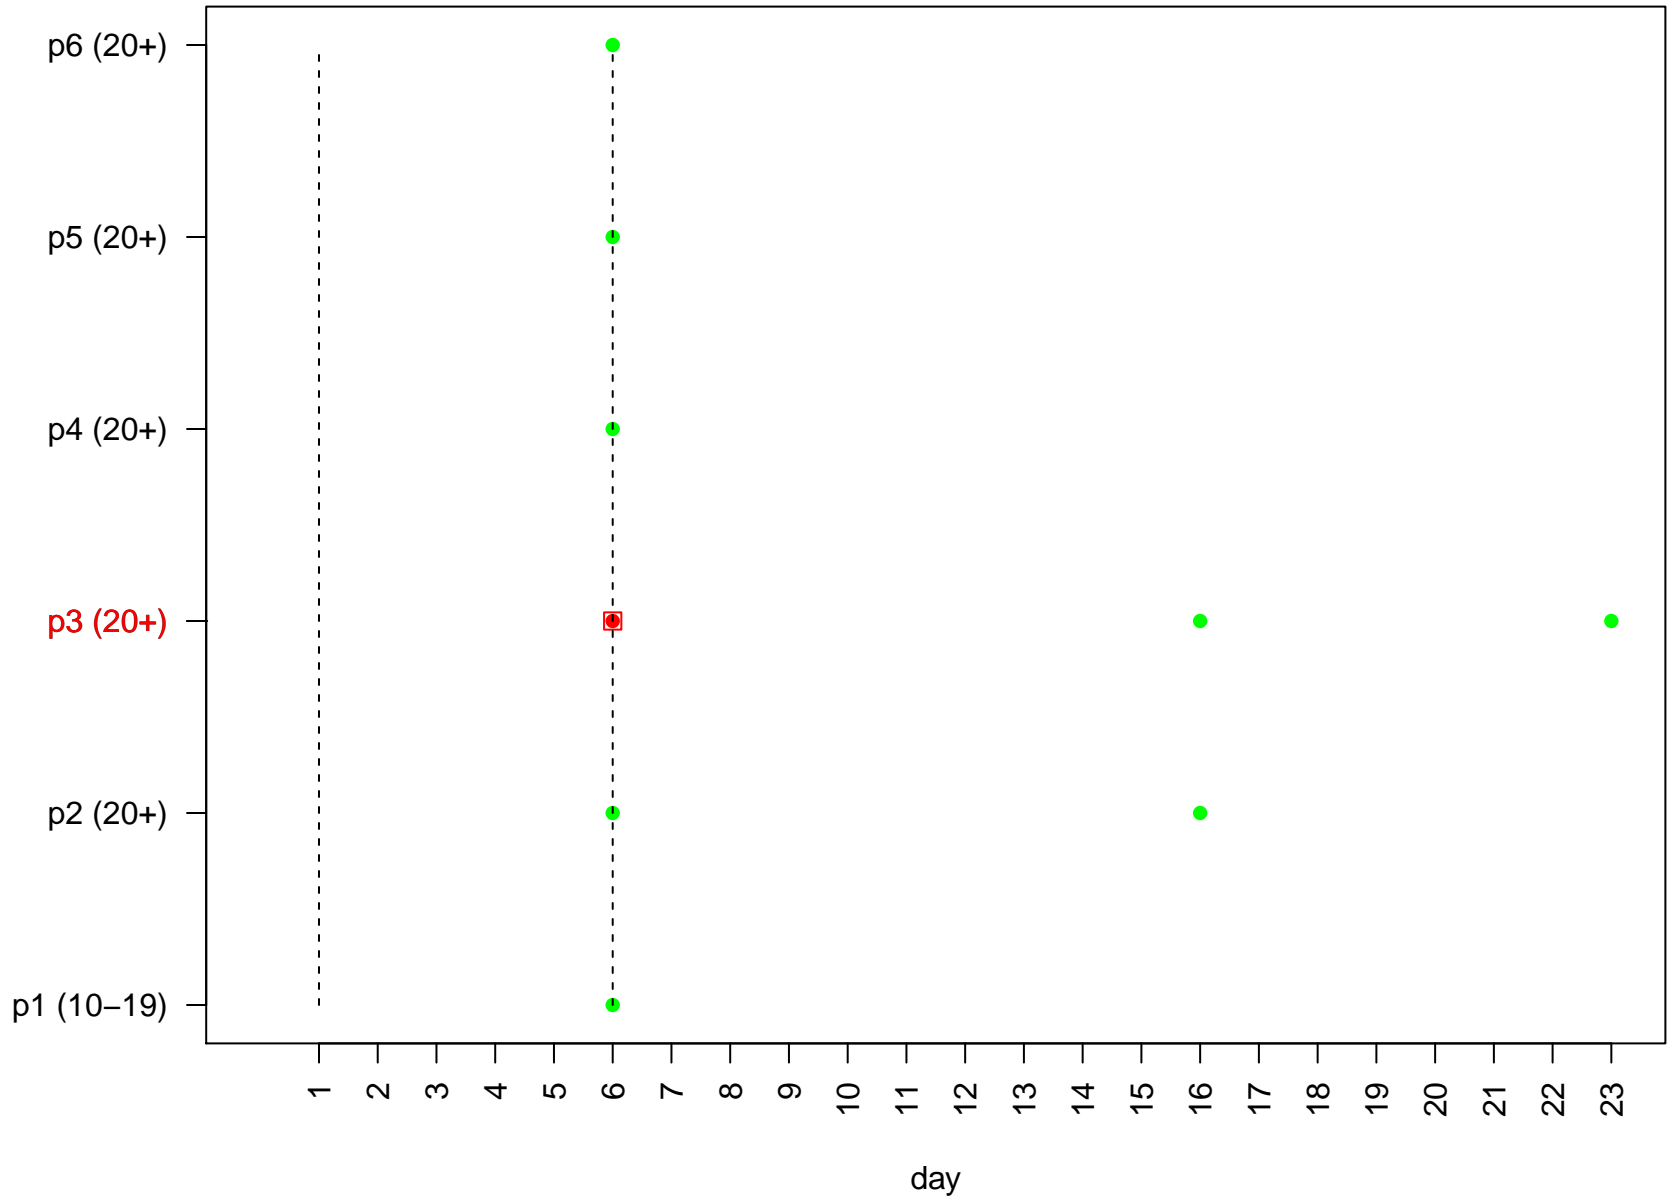

# Household 293

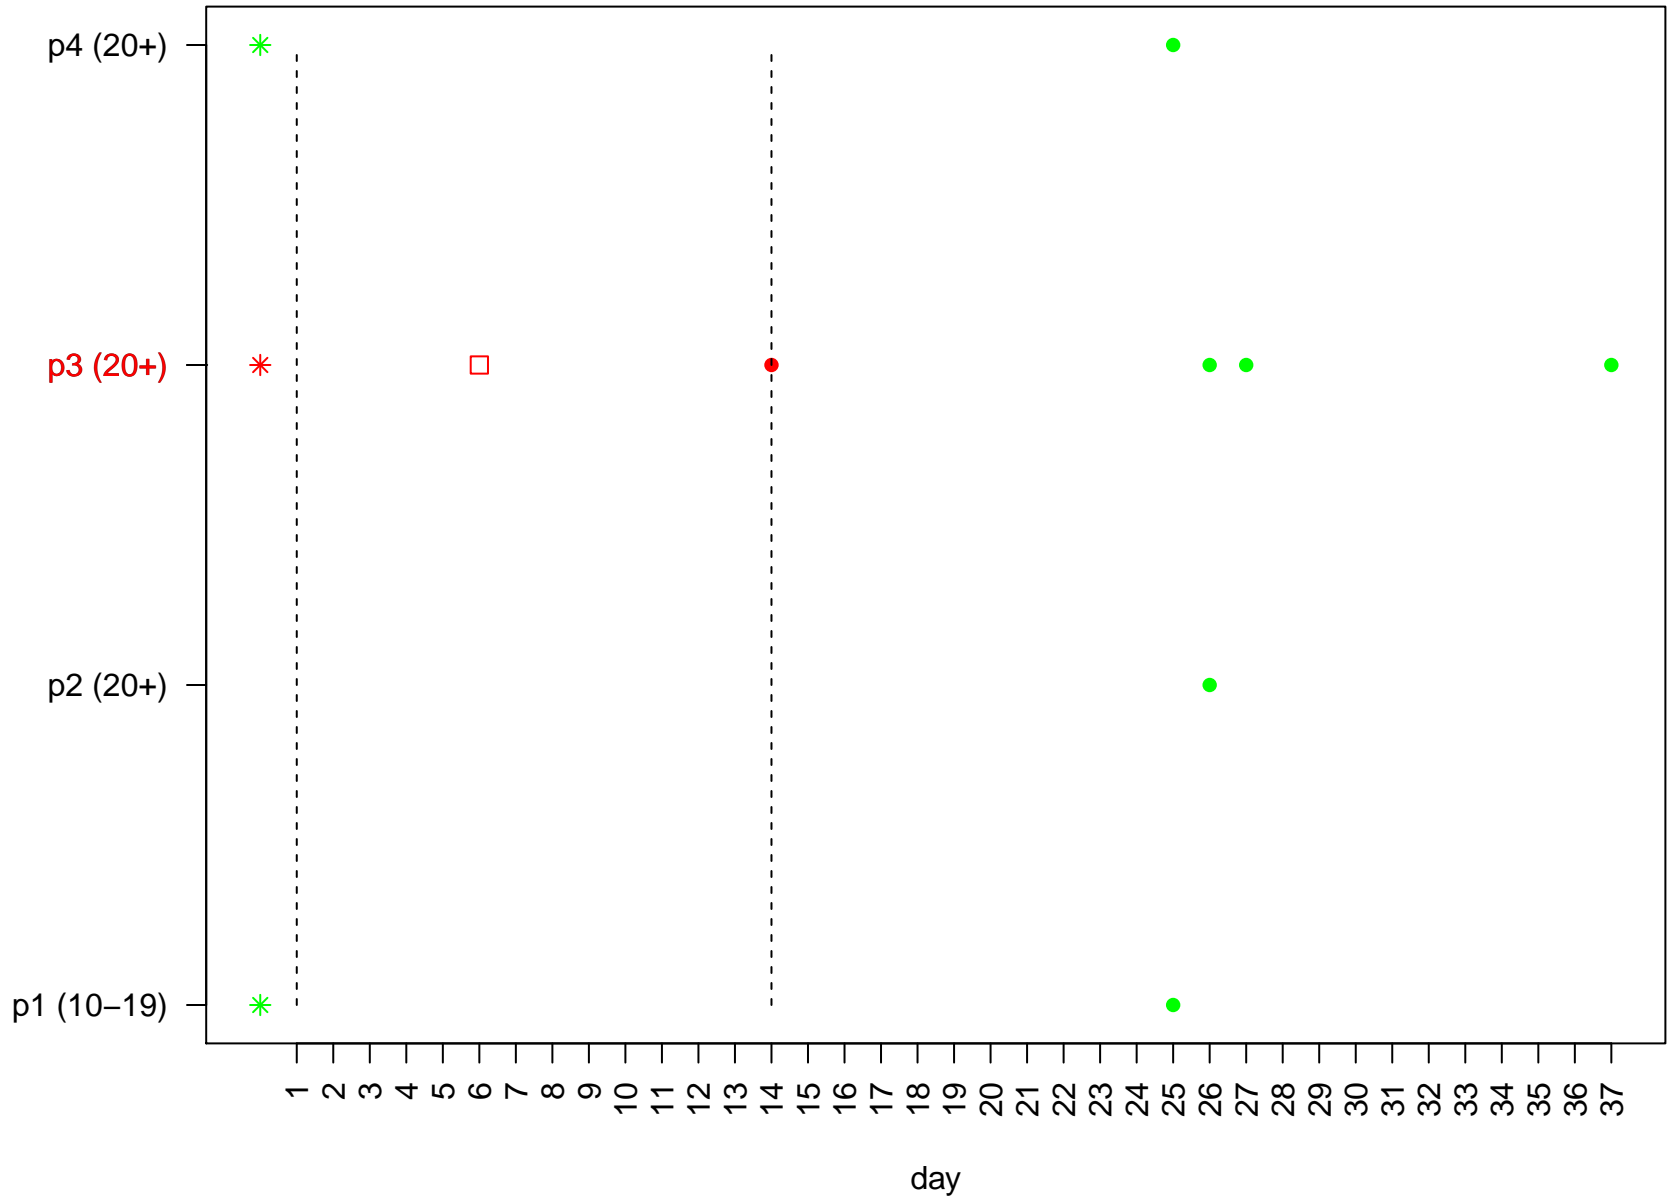

# Household 294

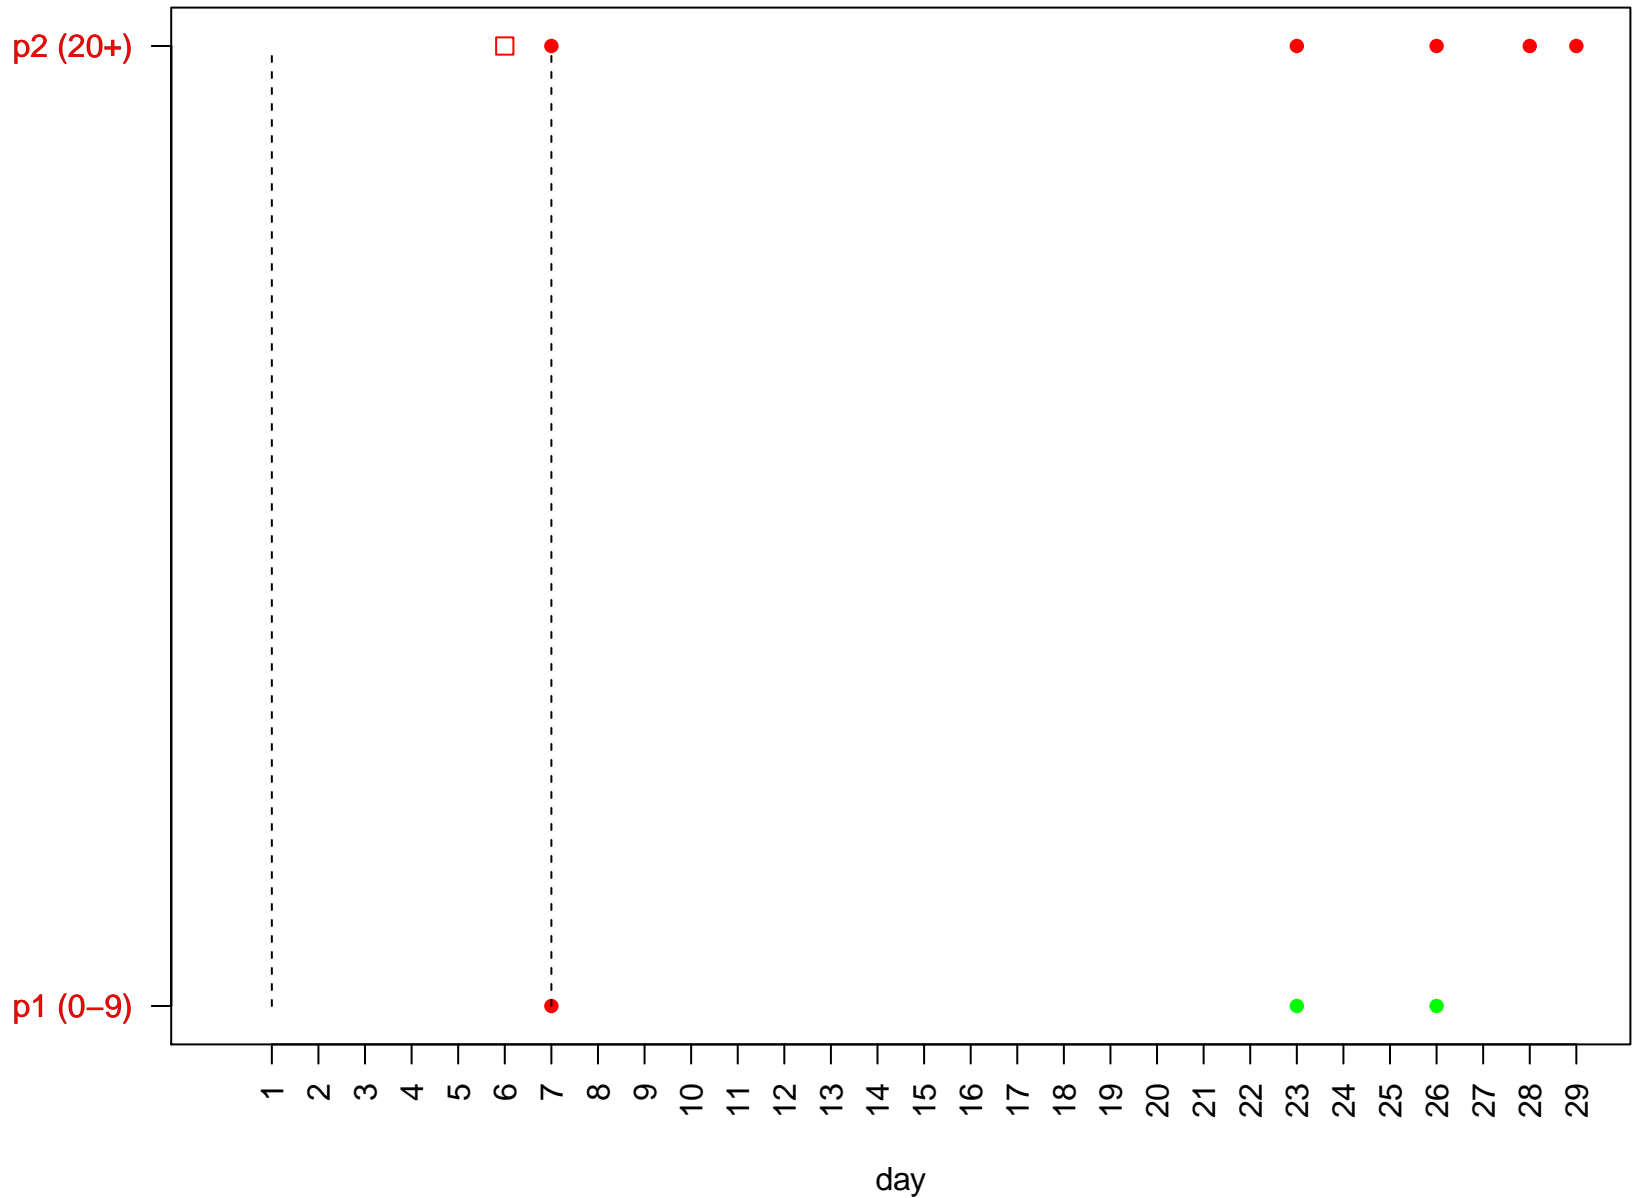

# Household 296

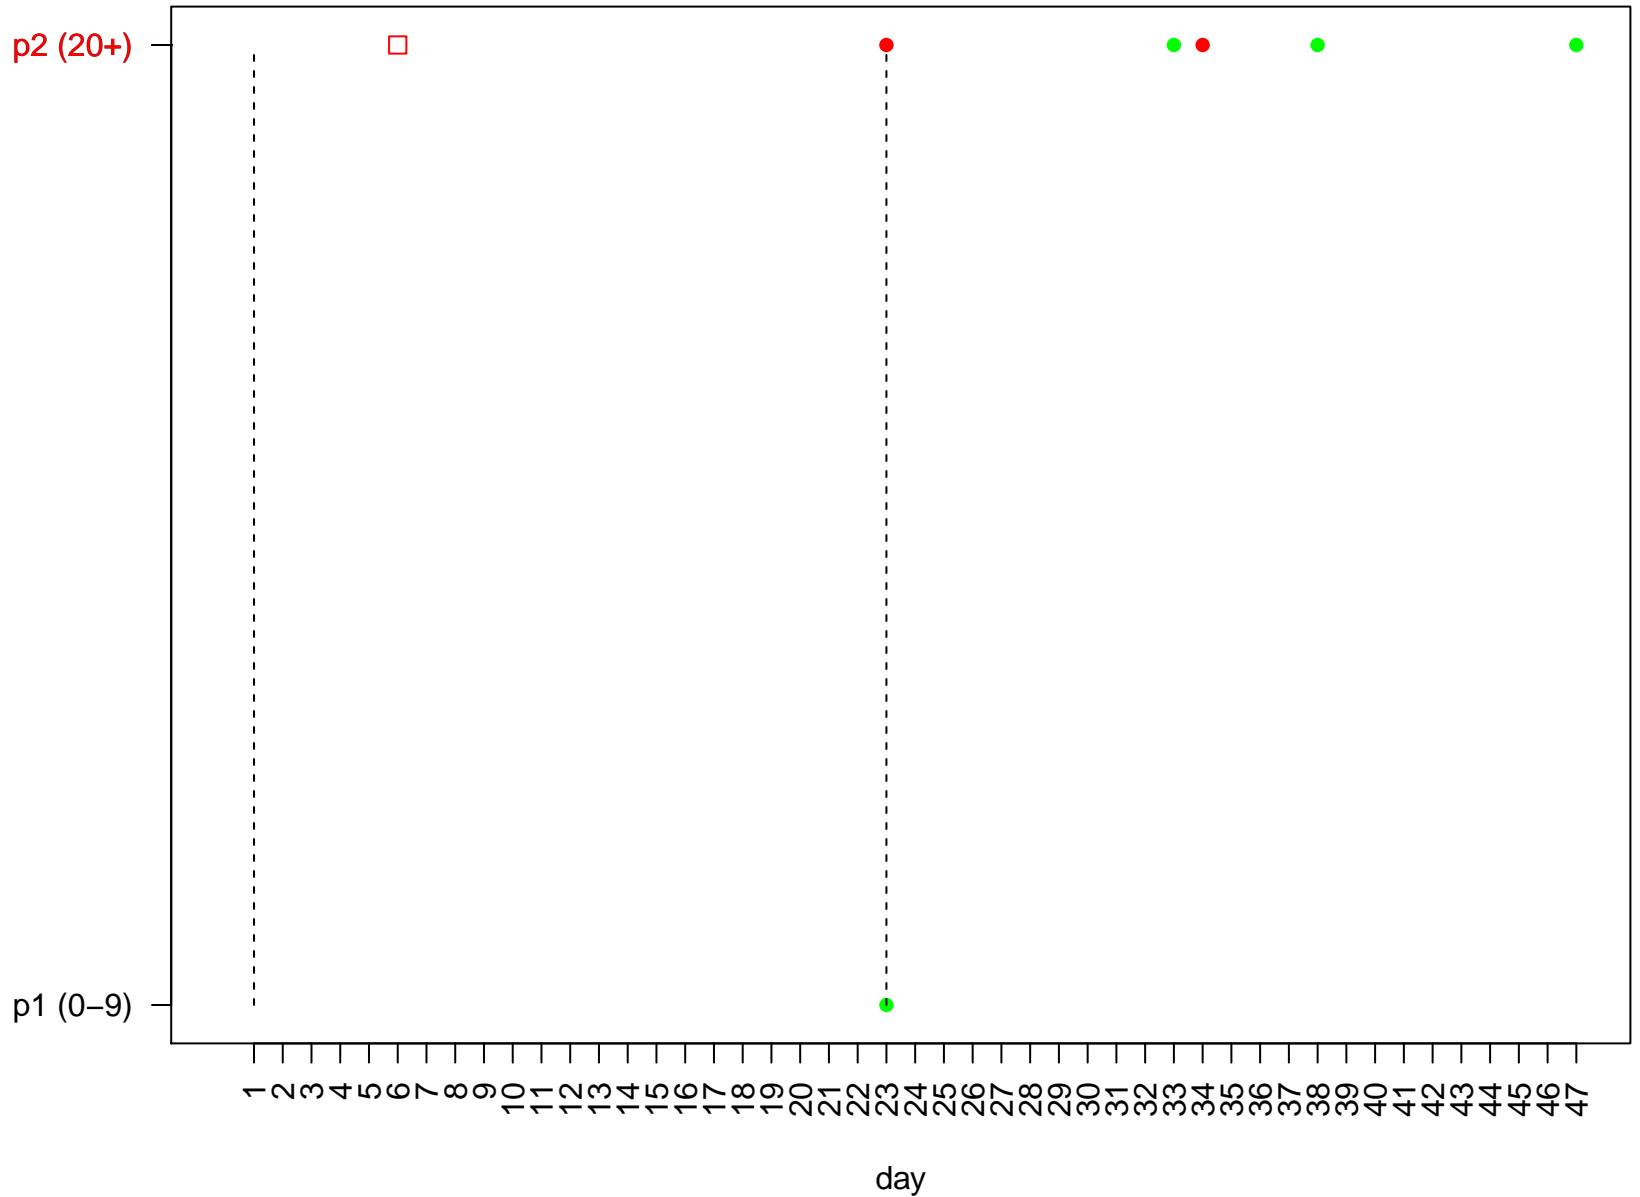

# Household 297

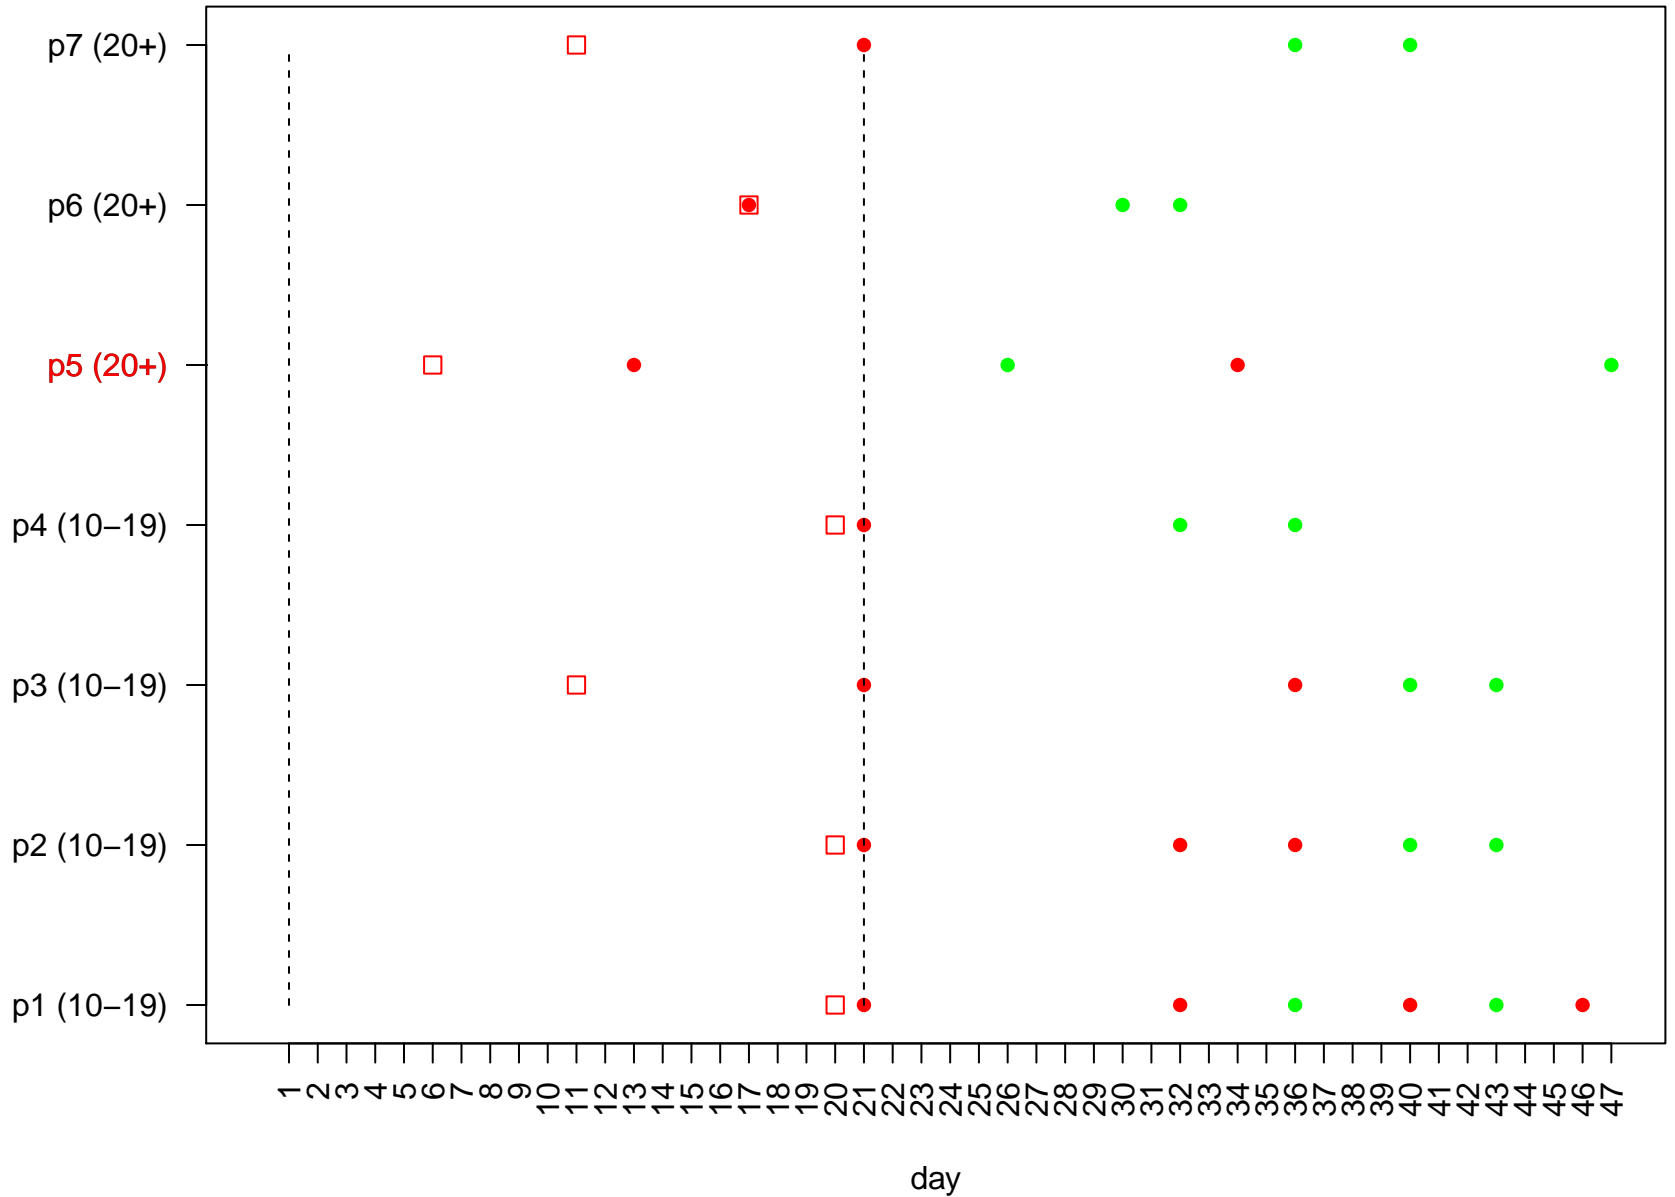

# Household 298

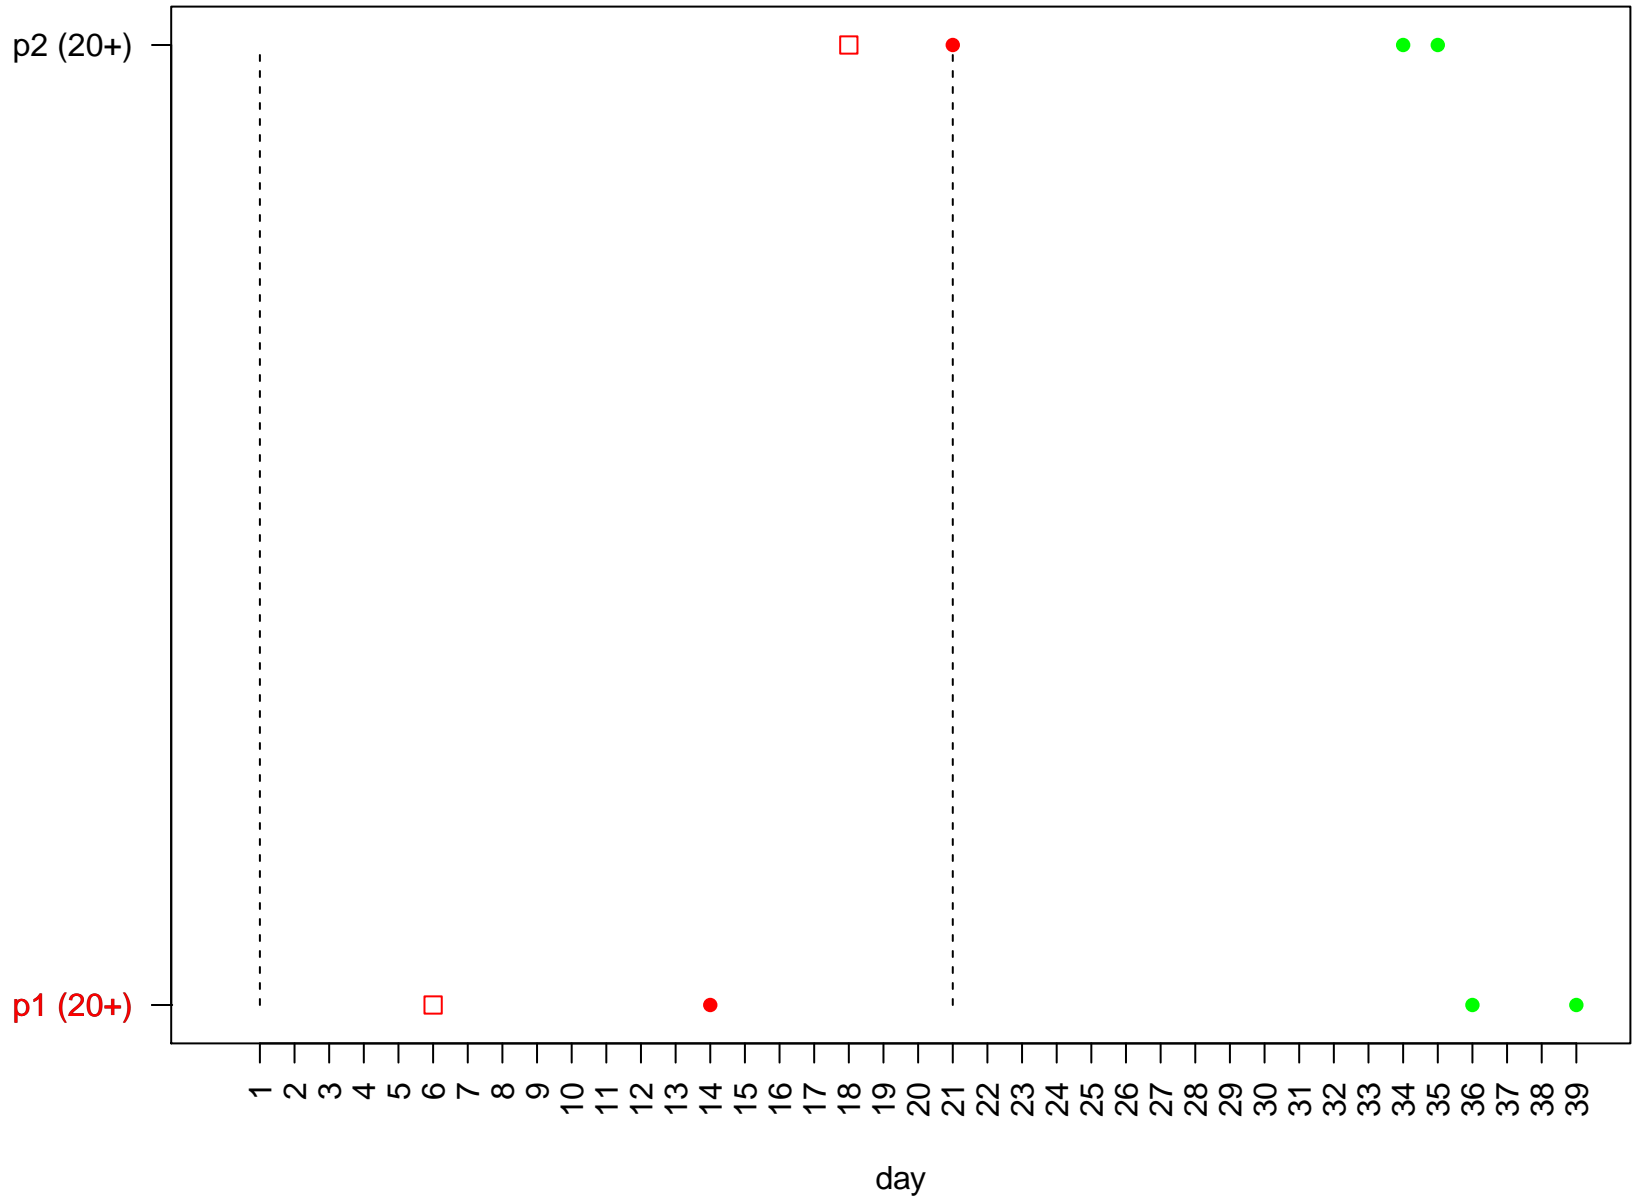

# Household 299

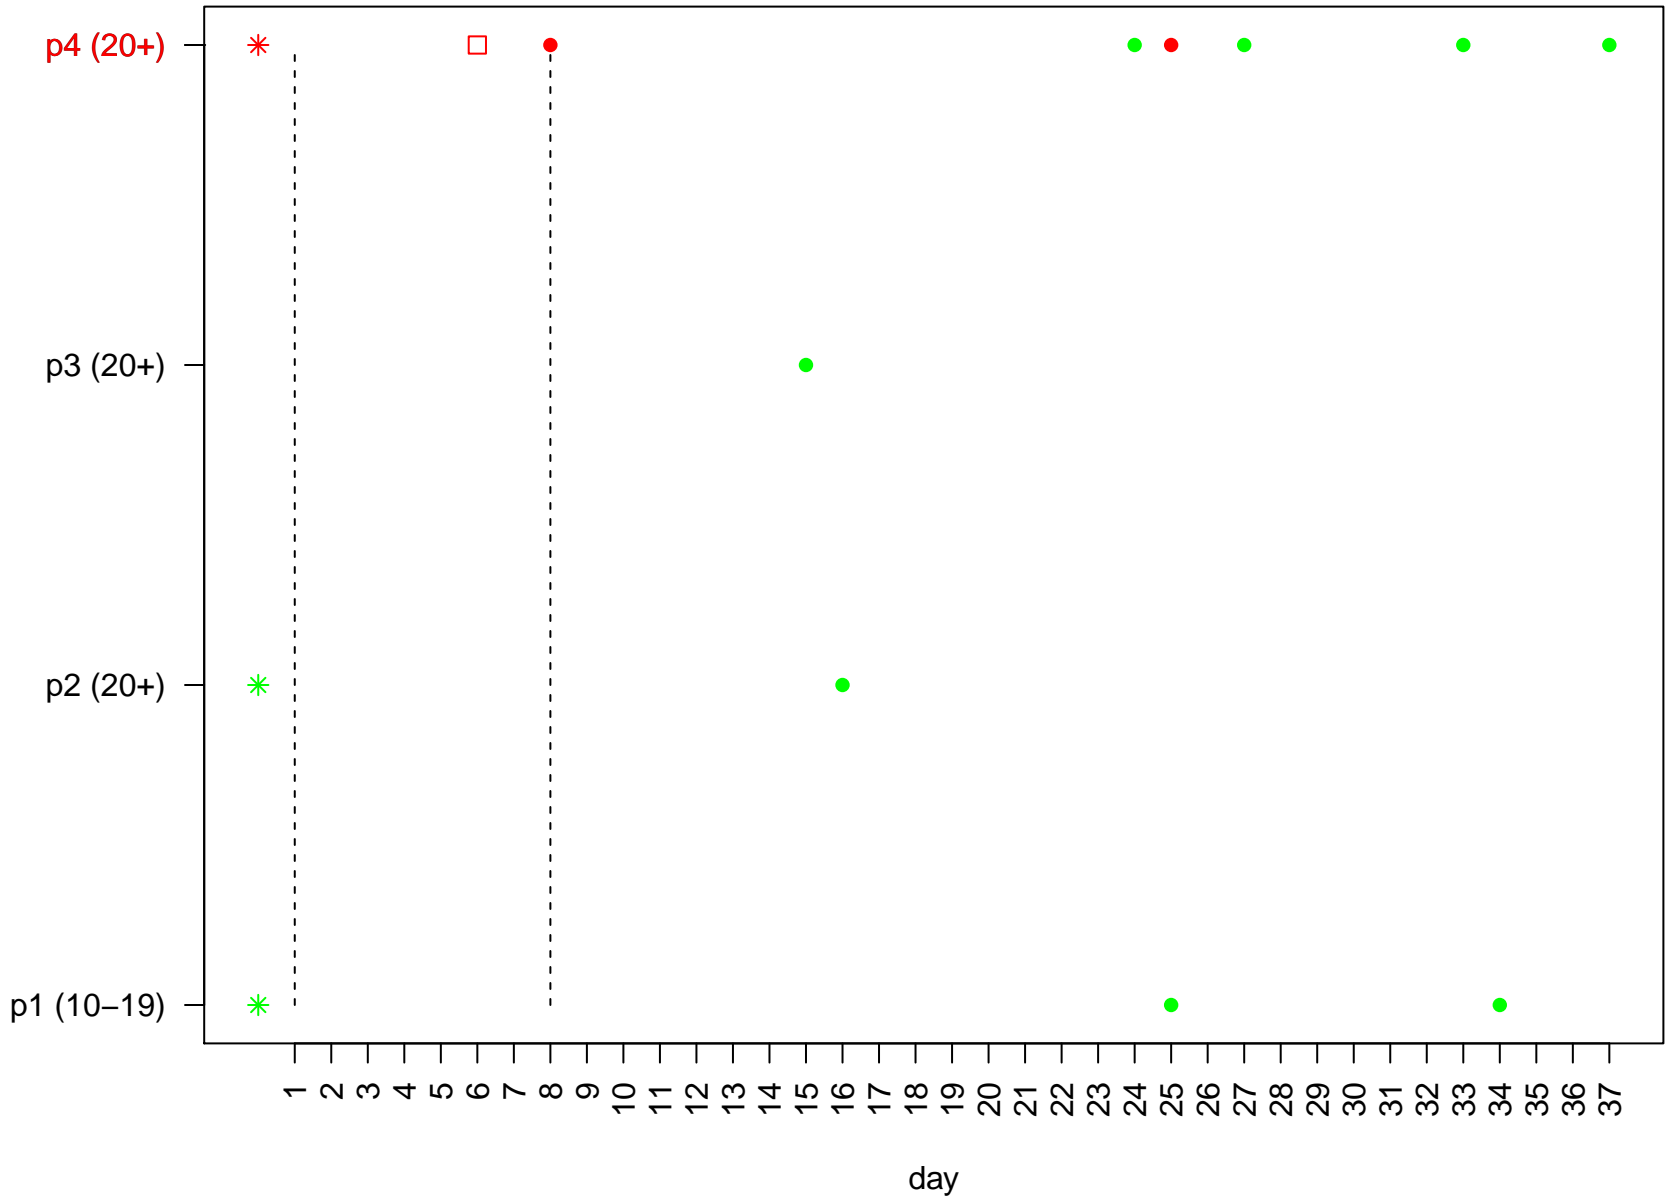

# Household 300

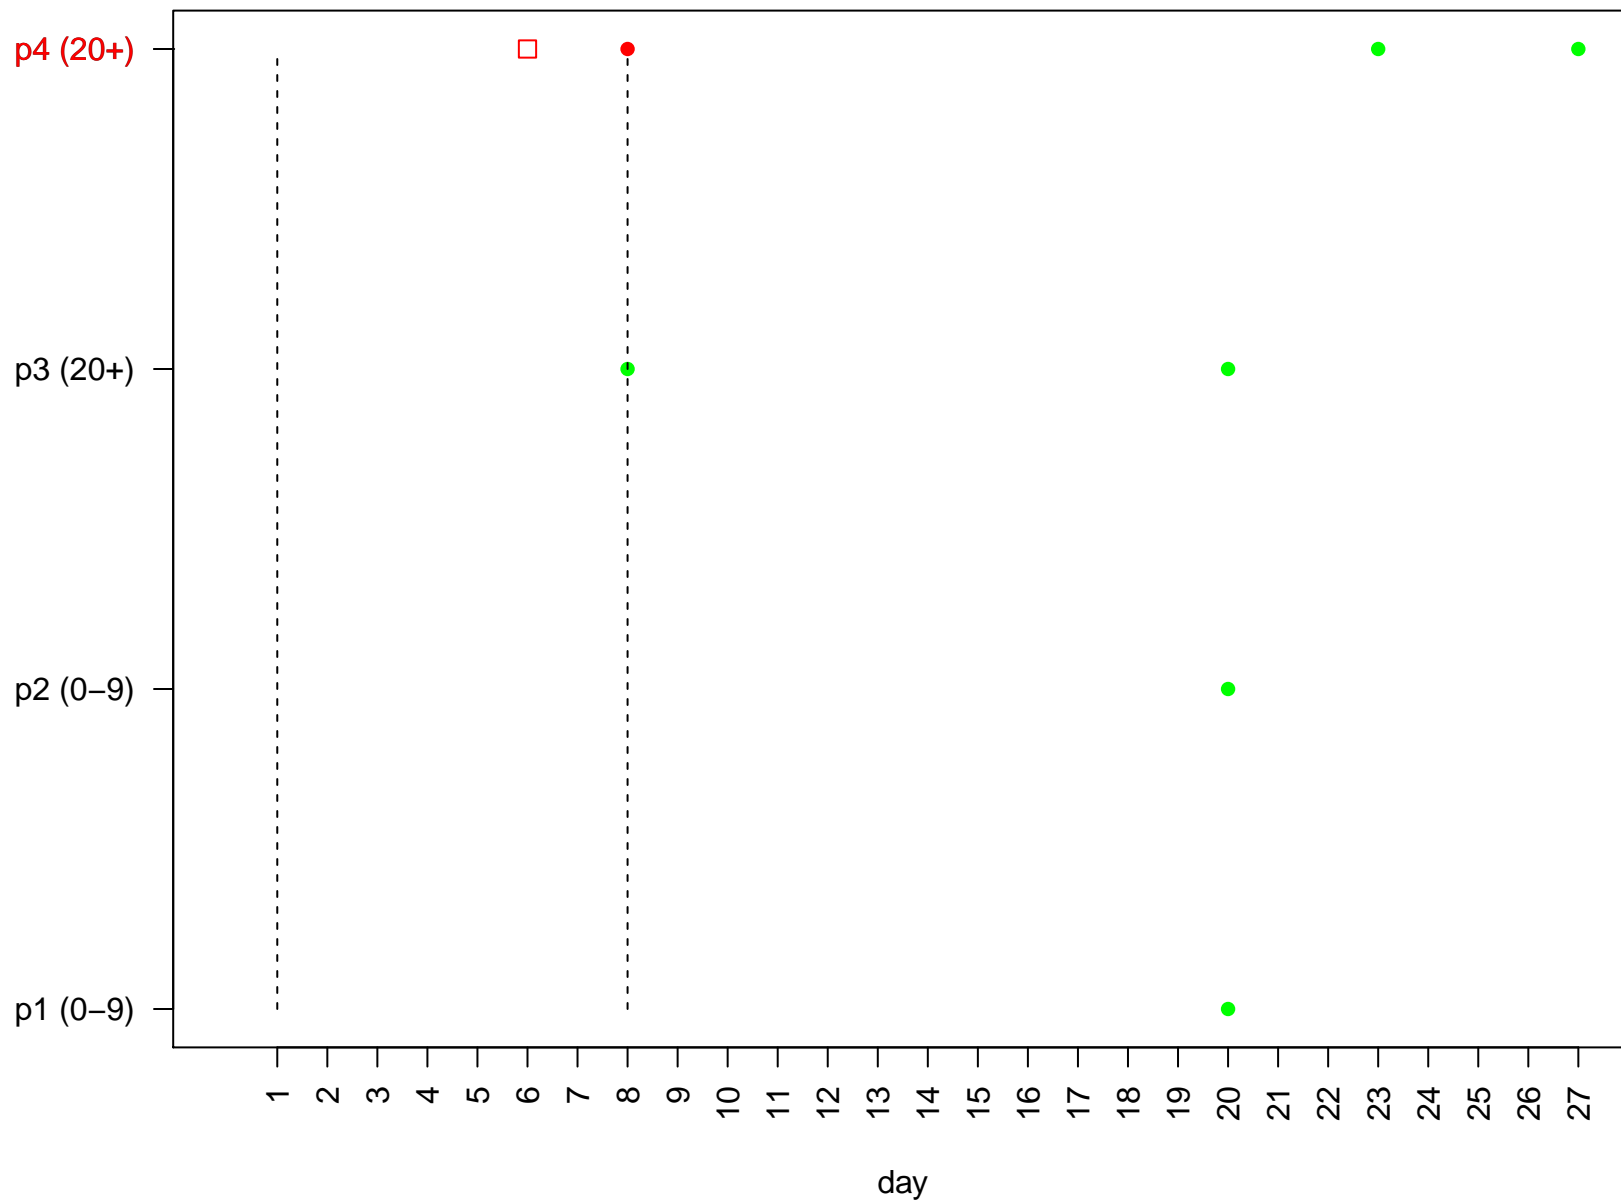



# Household 301

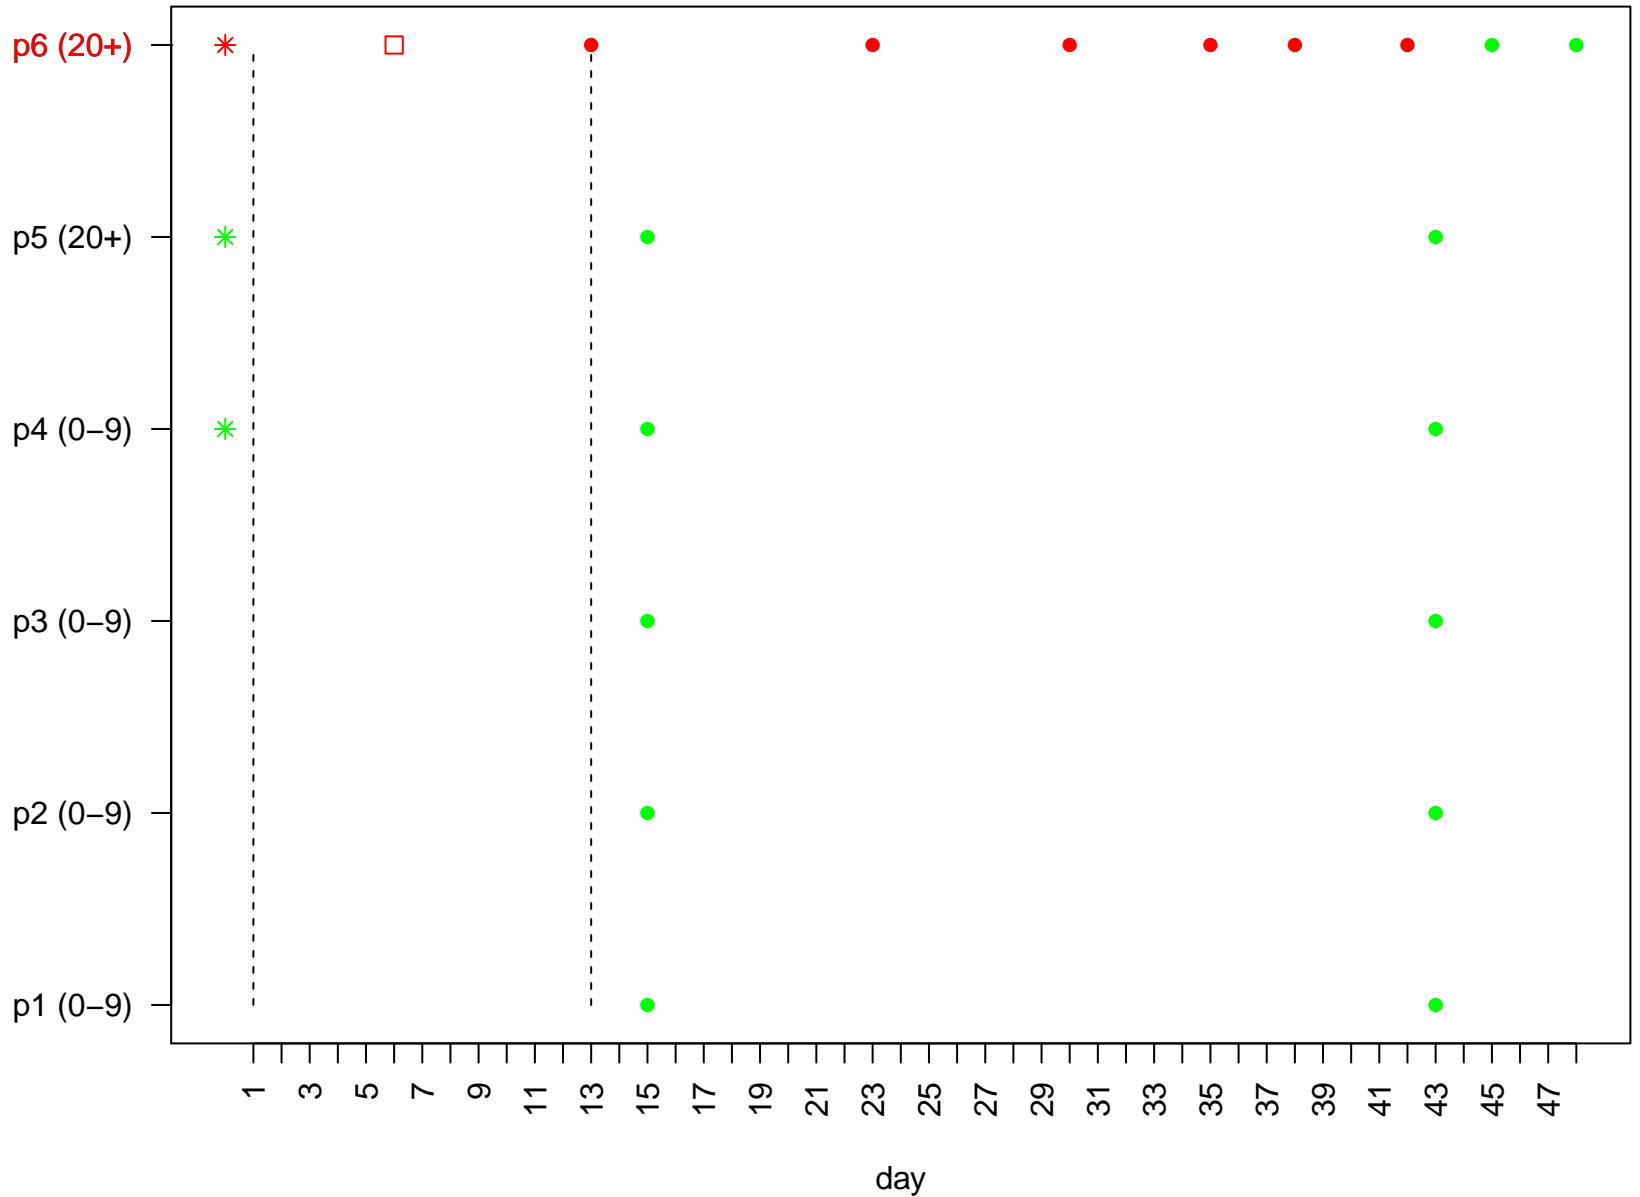

# Household 302

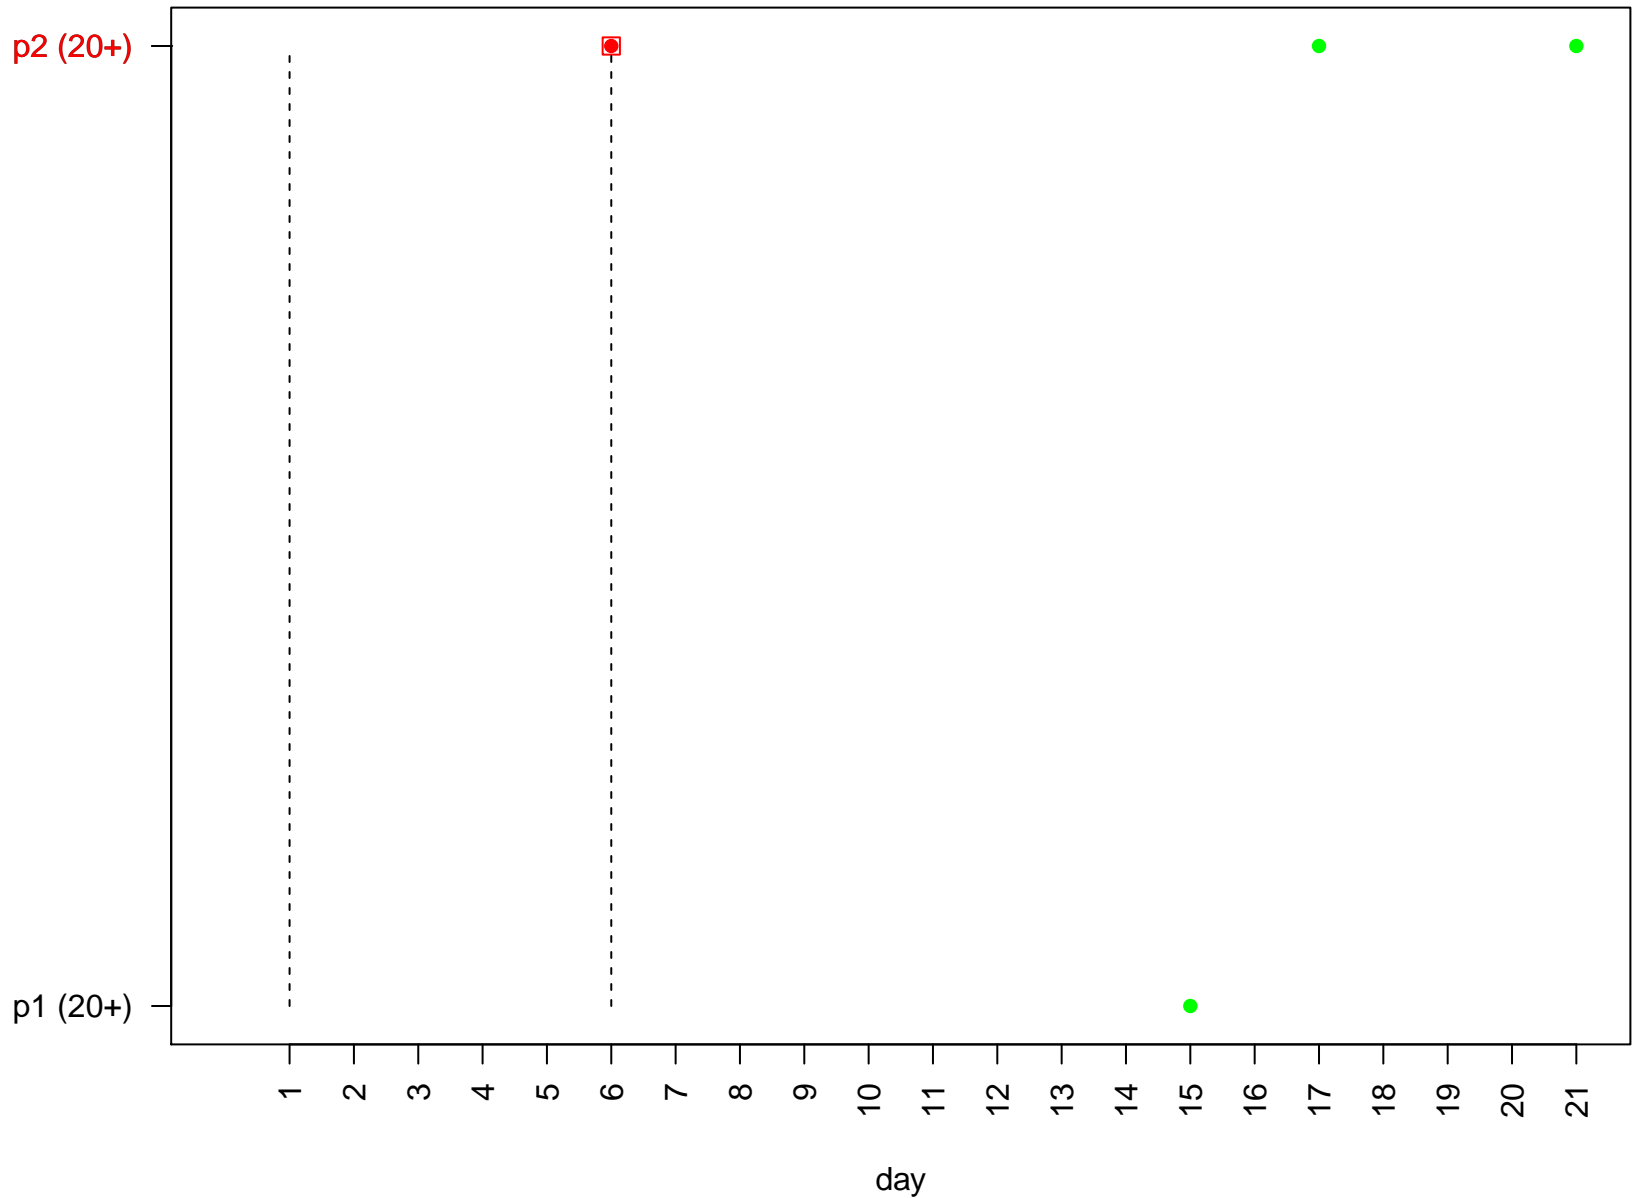

# Household 303

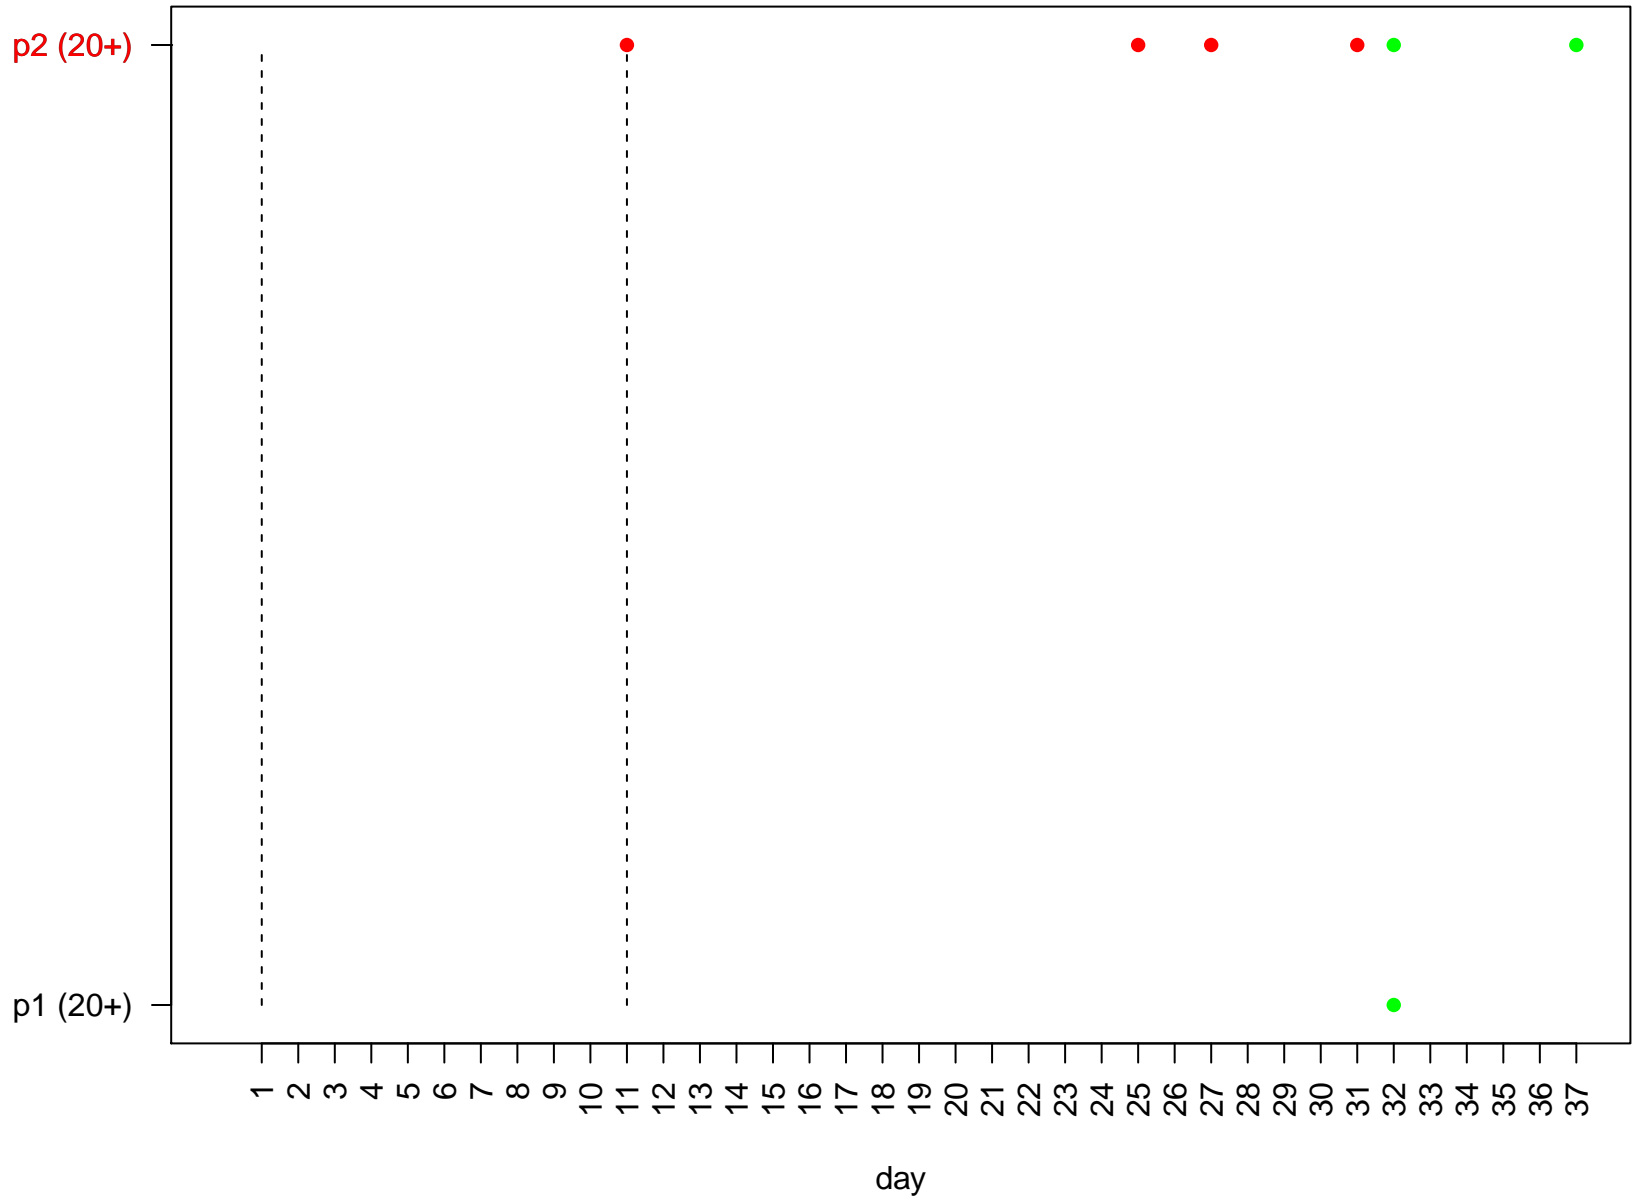

# Household 304

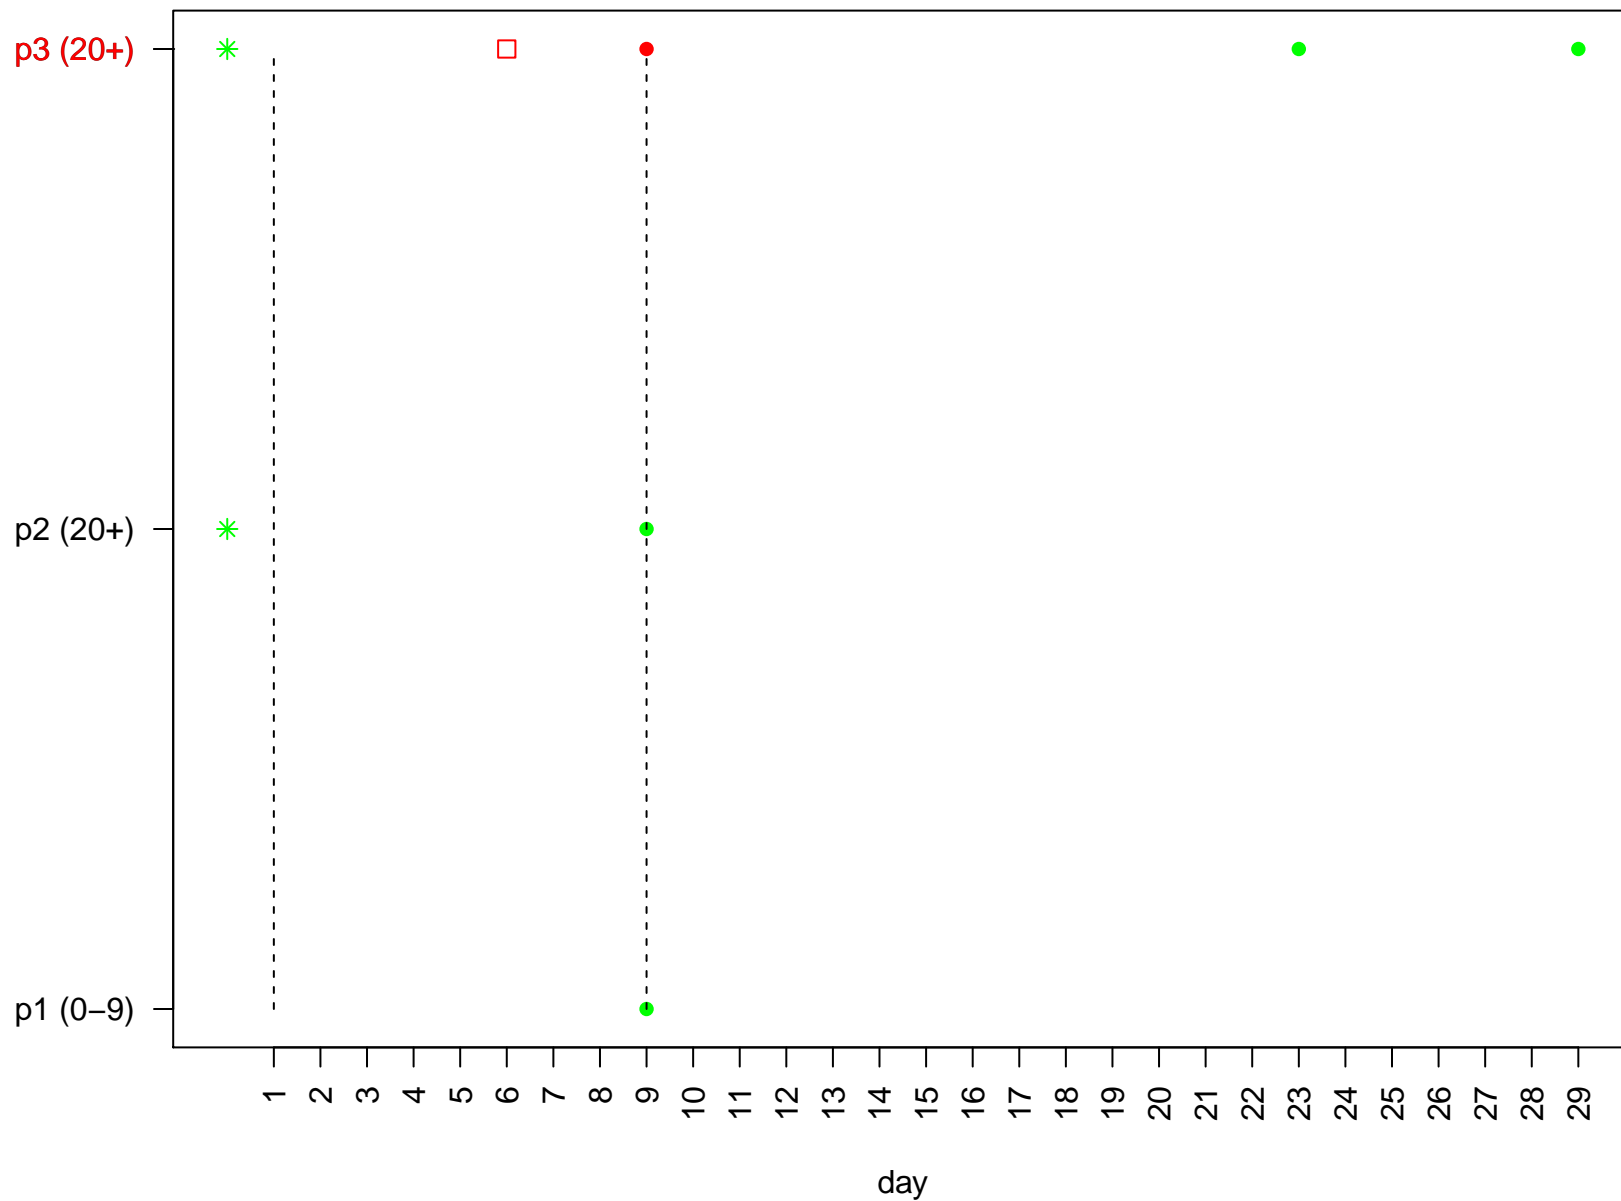

# Household 305

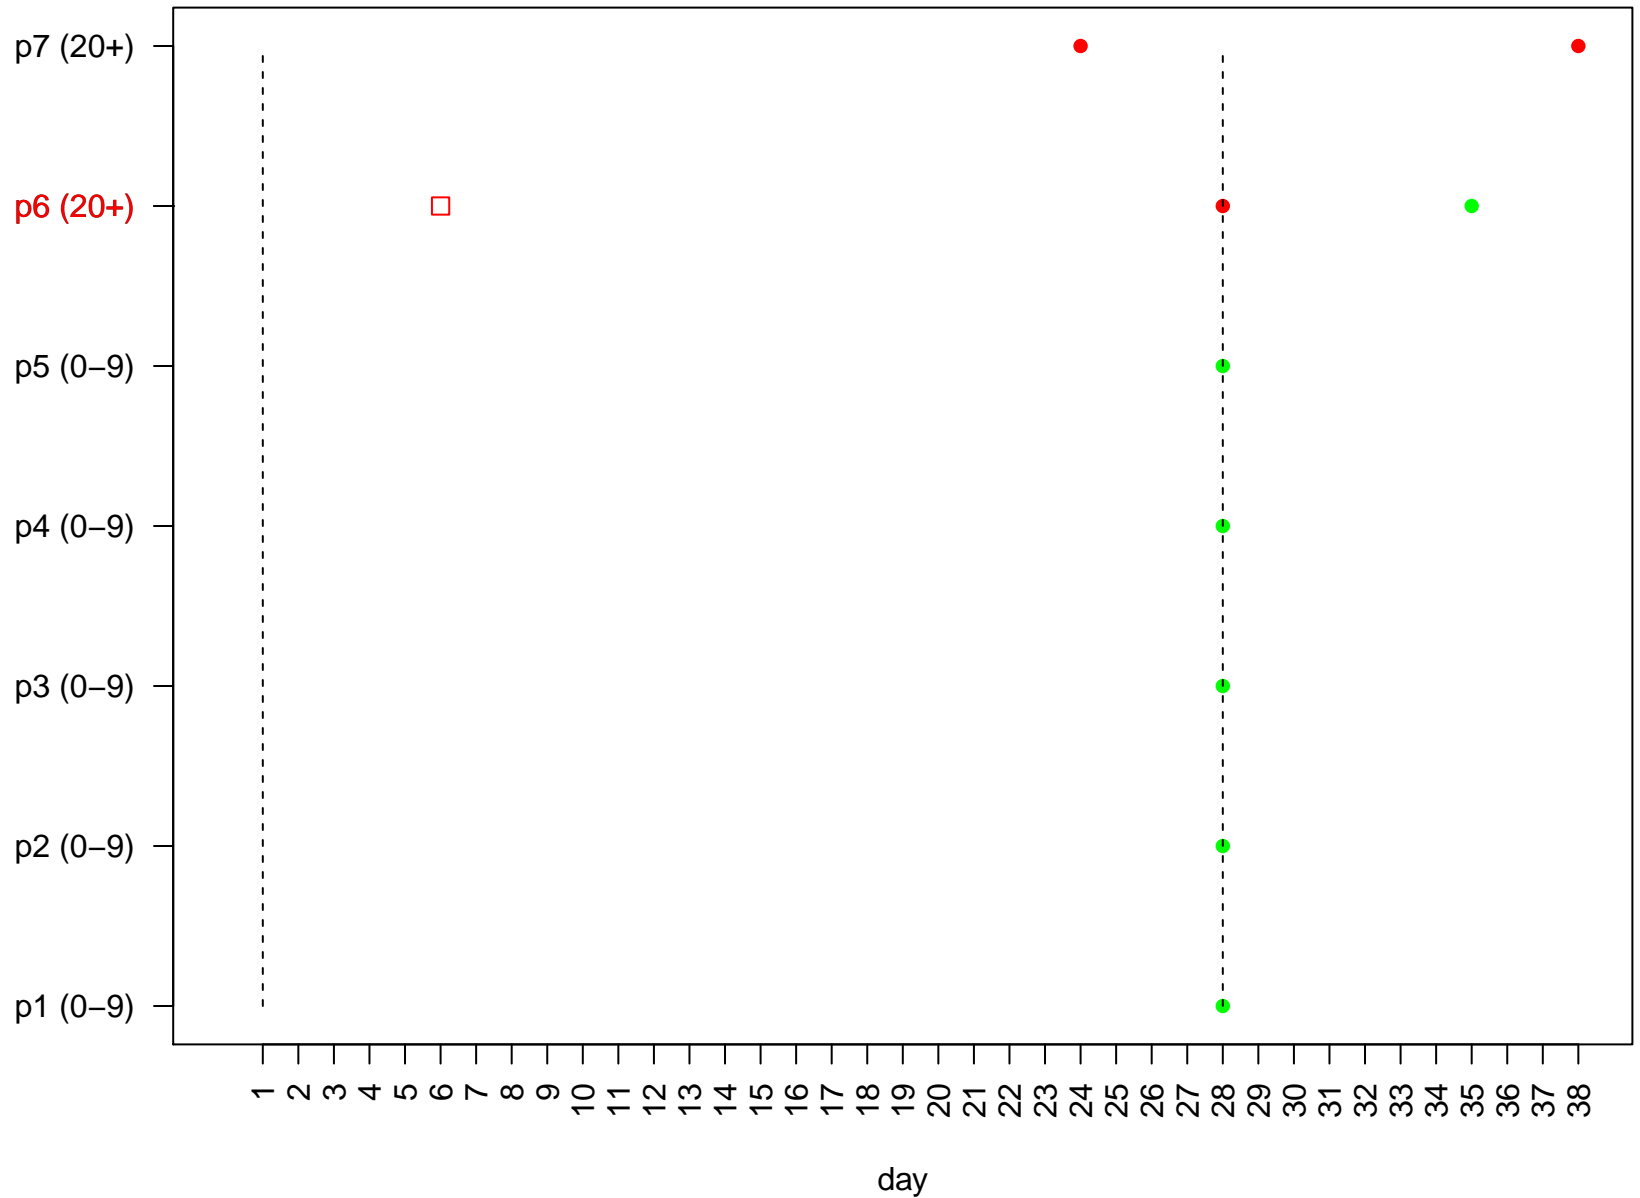



# Household 307

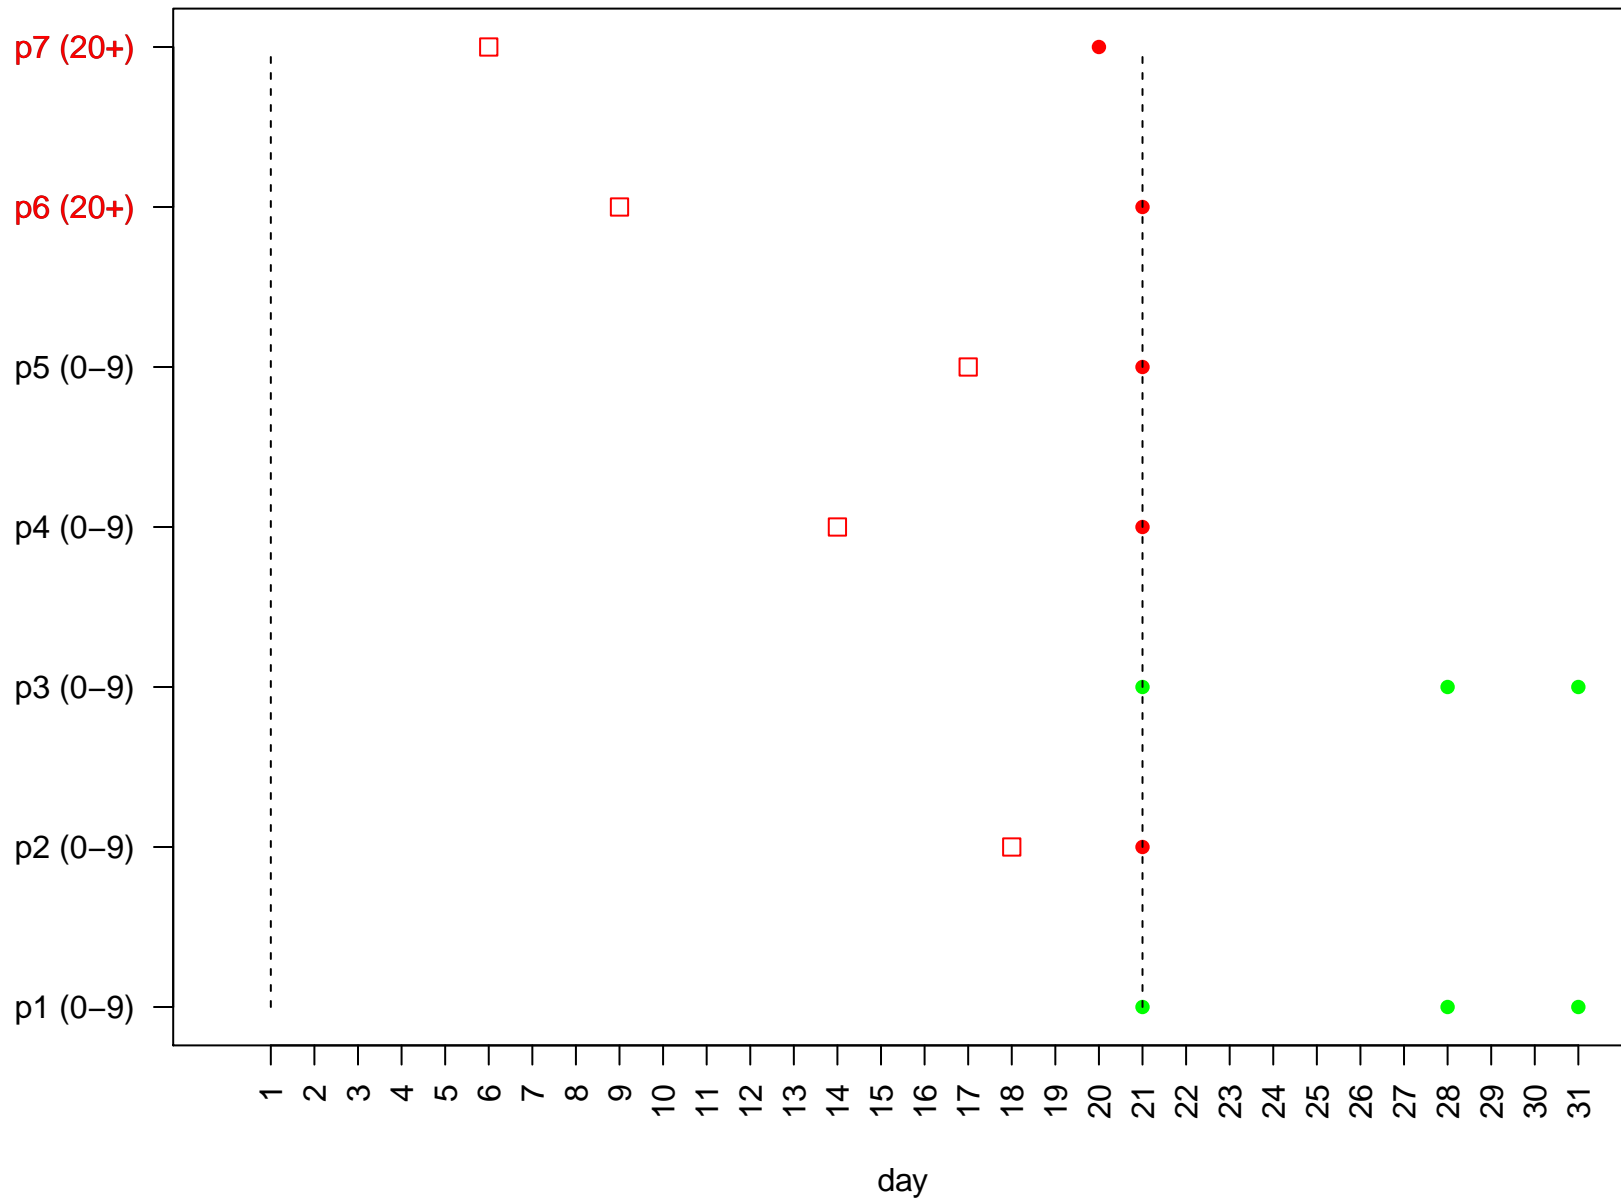

# Household 308

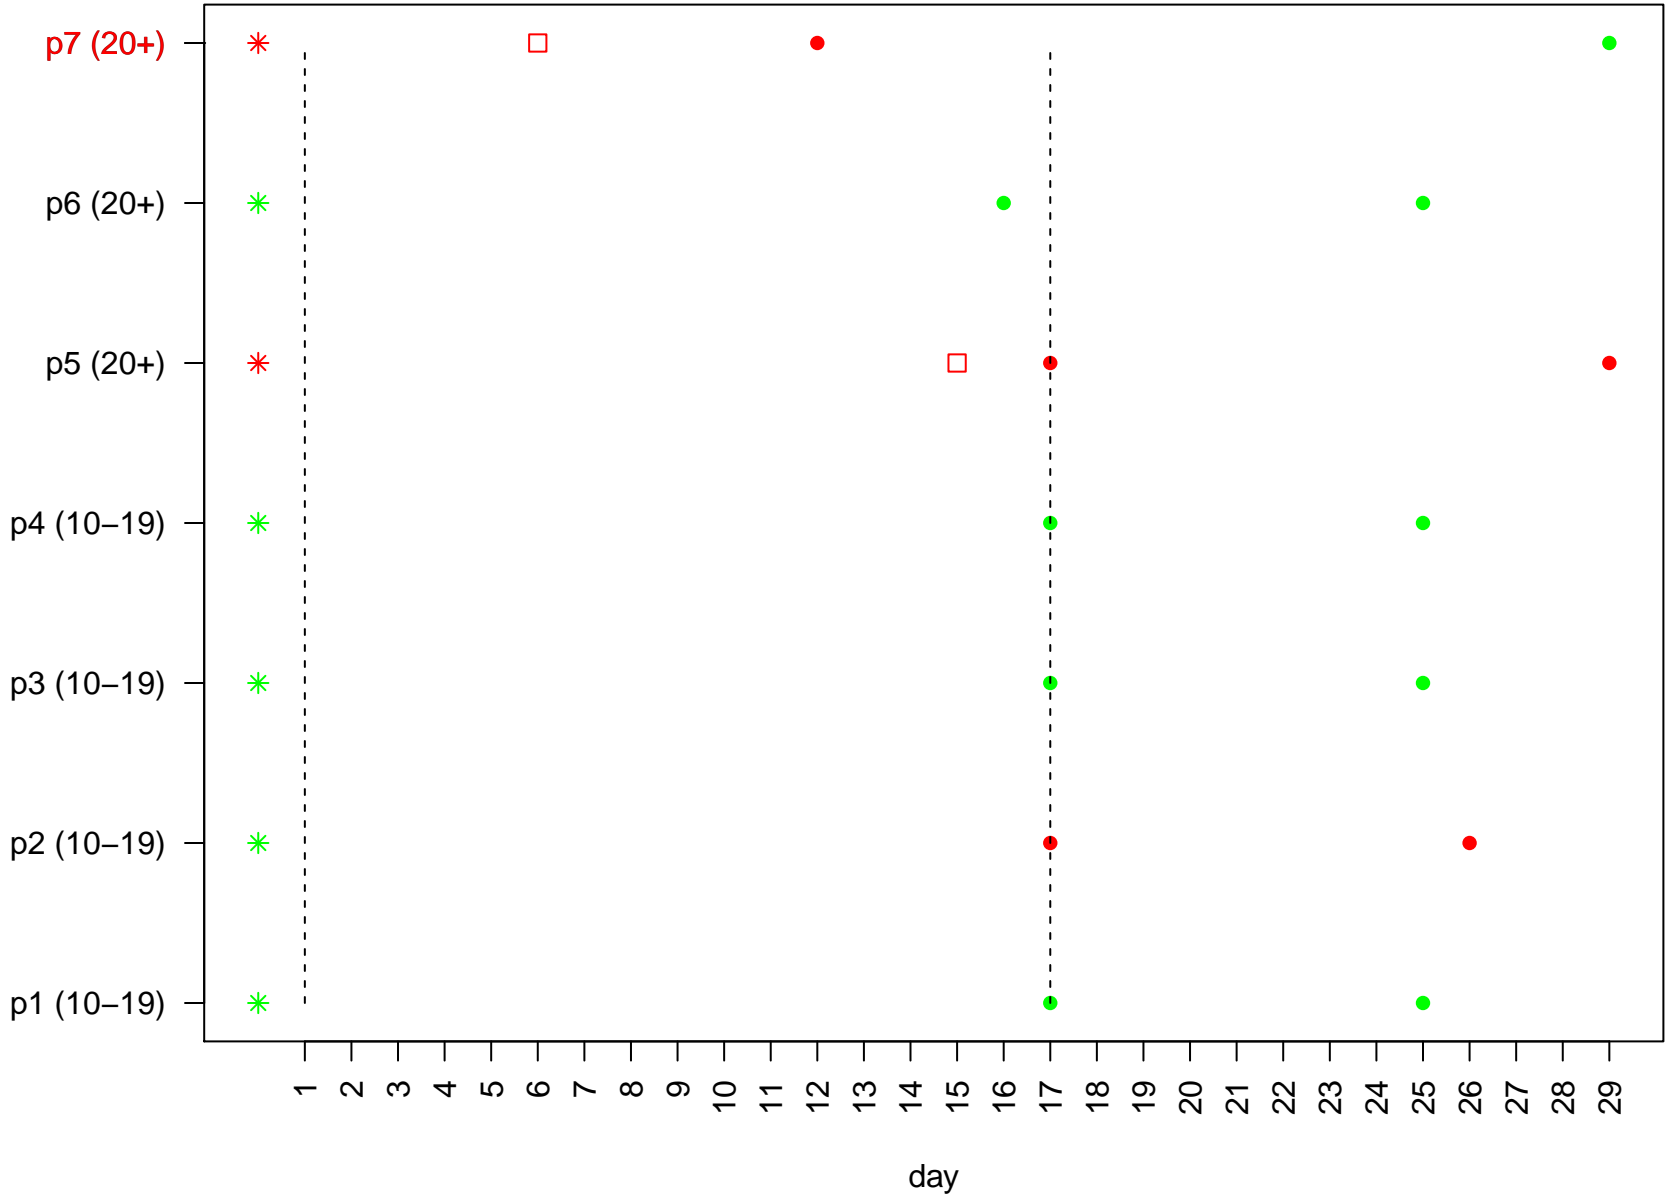



# Household 309

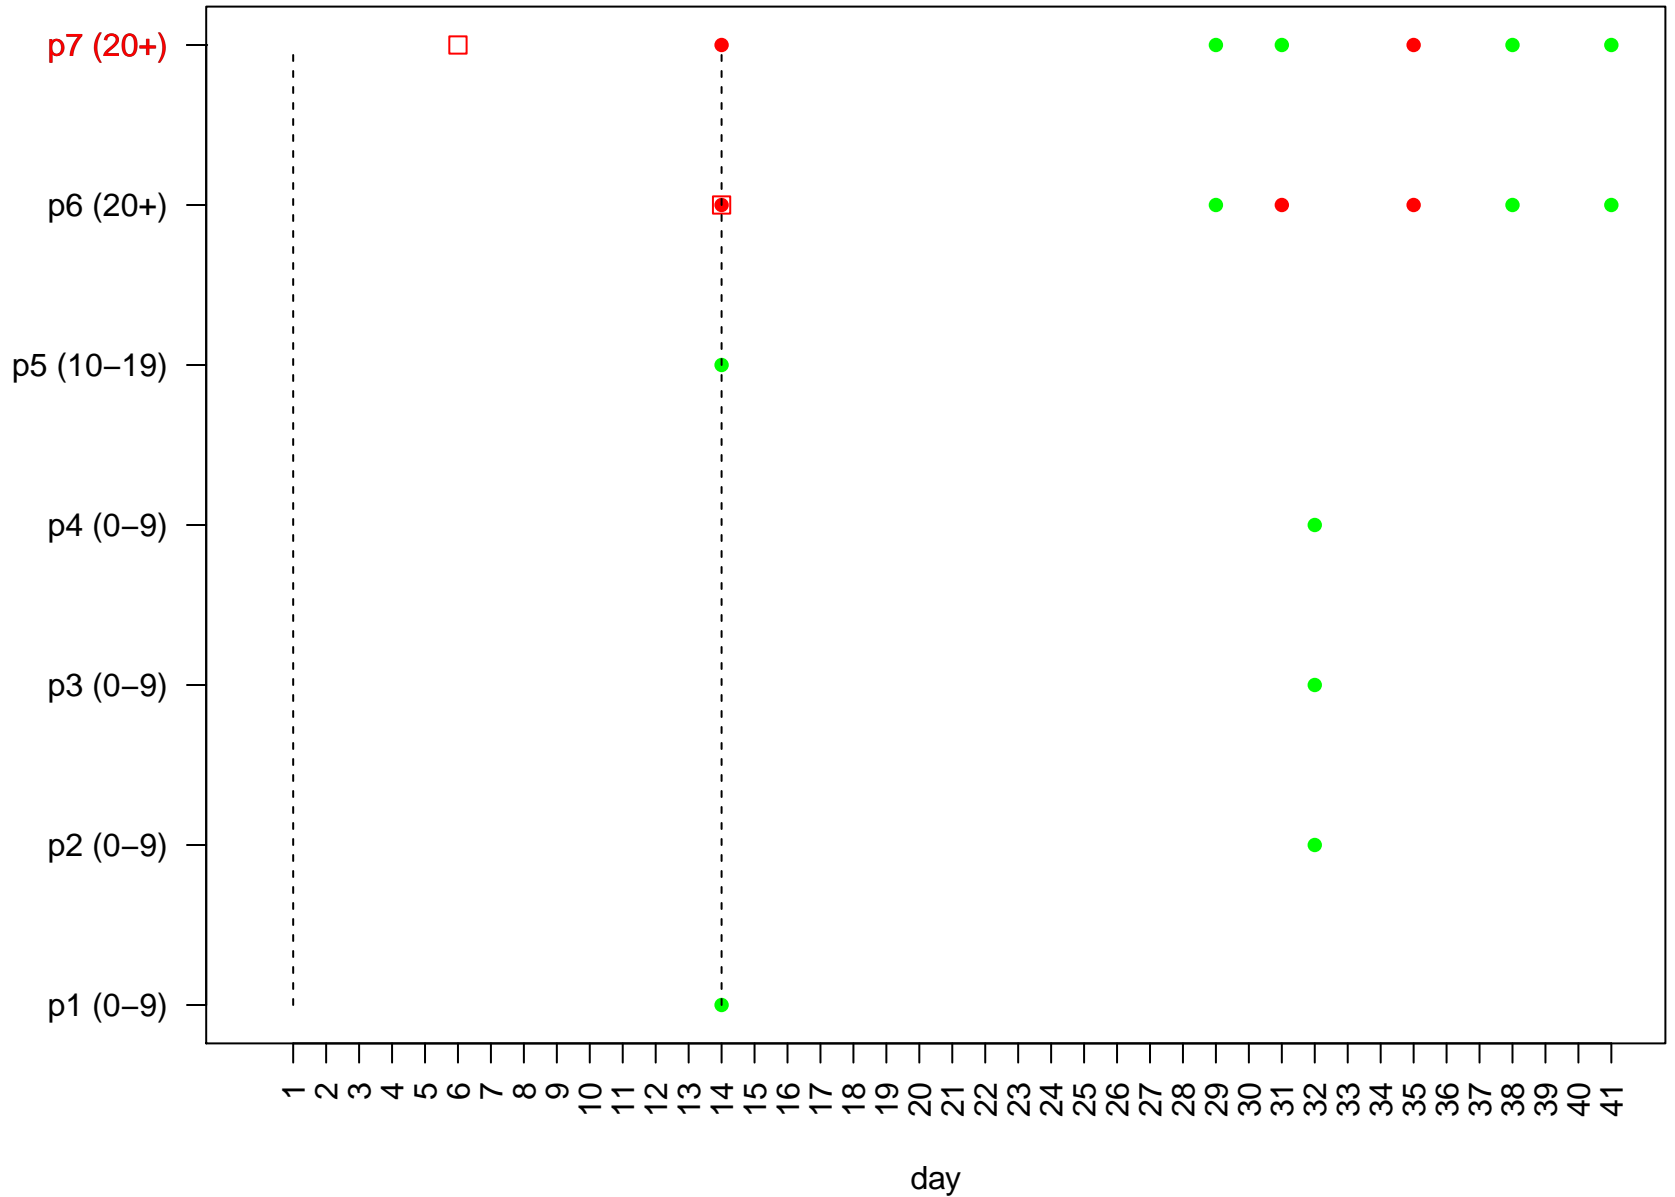

# Household 310

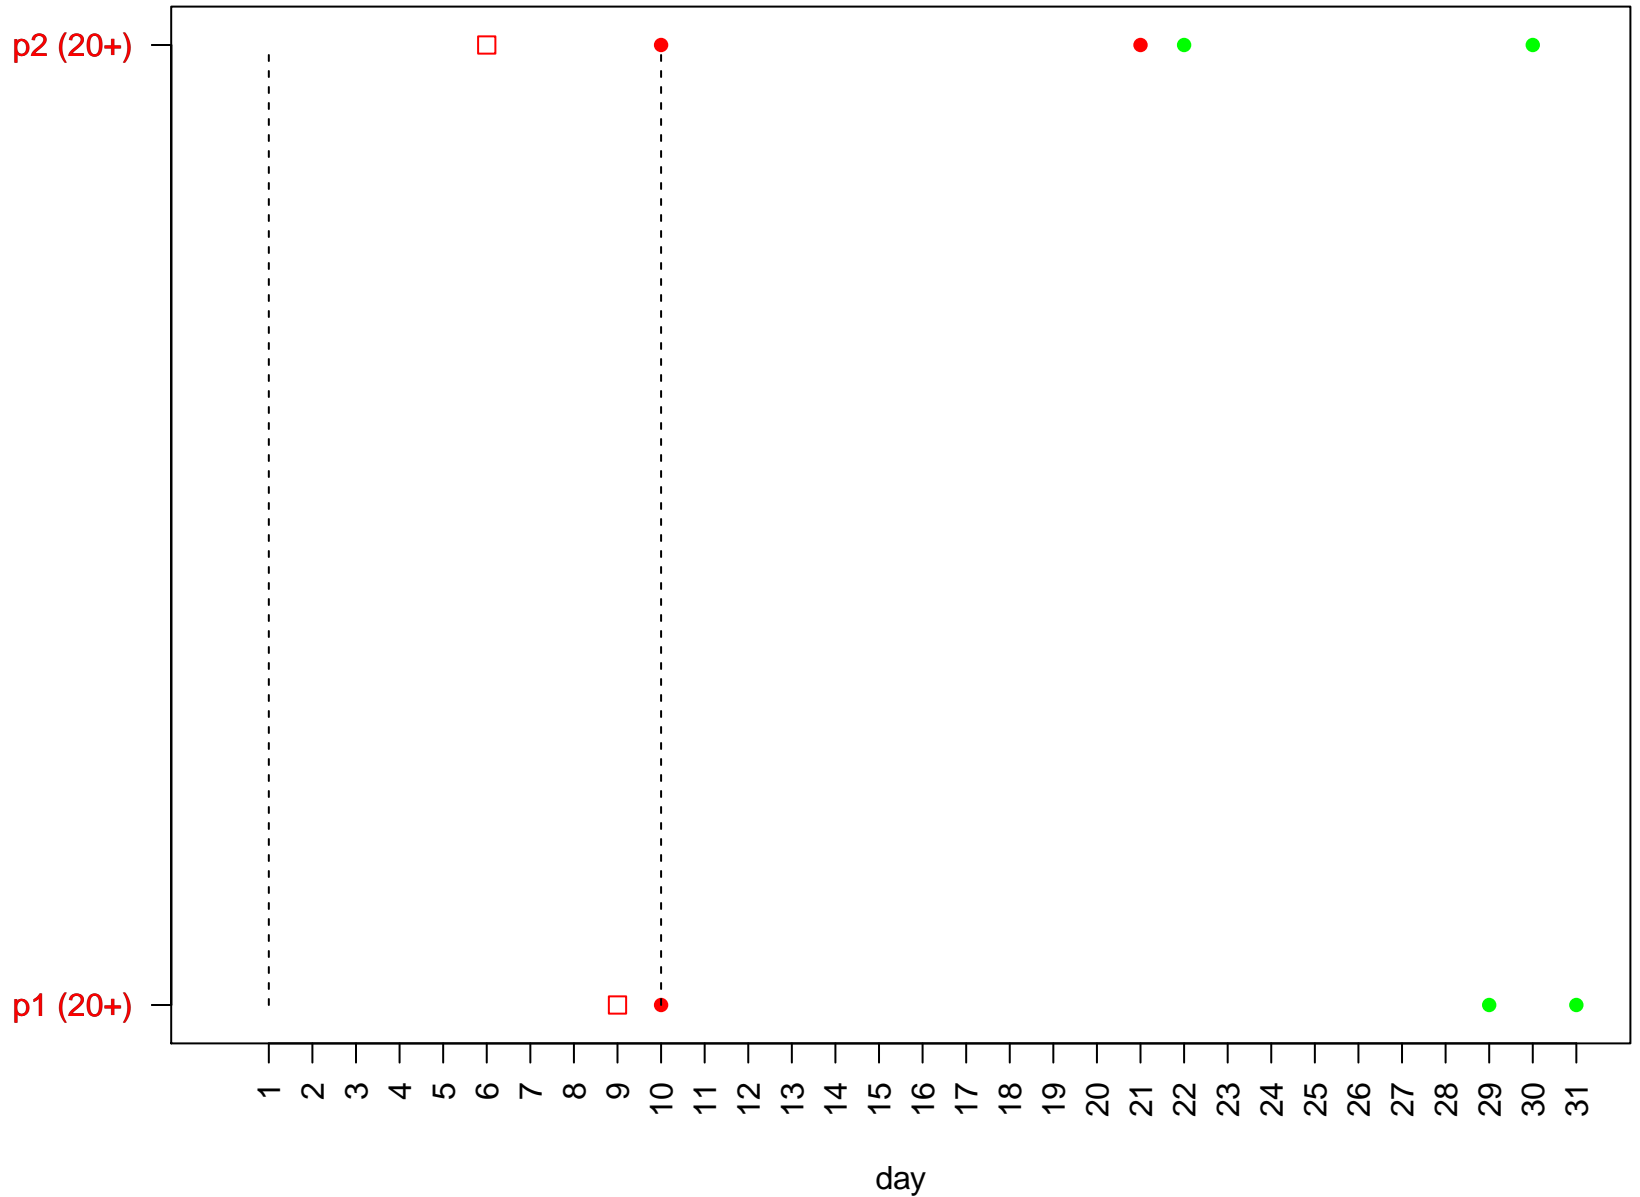

# Household 311

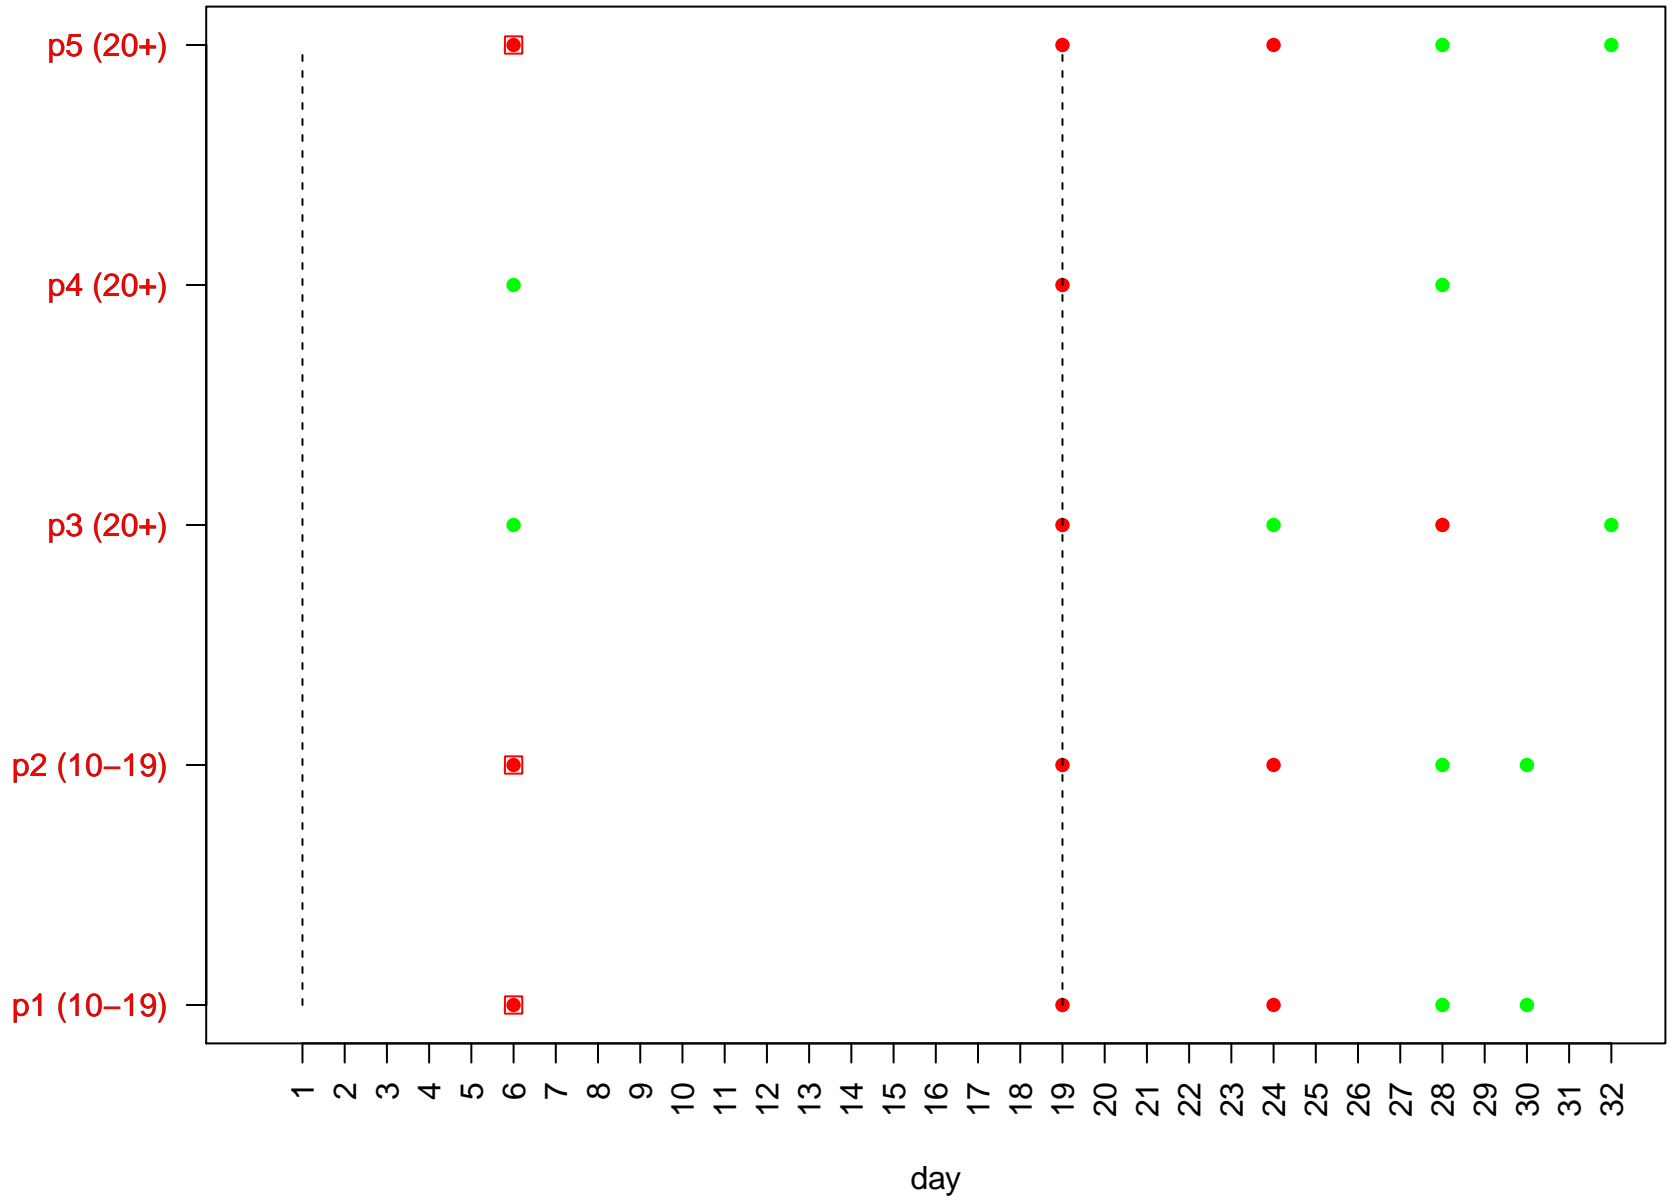

# Household 312

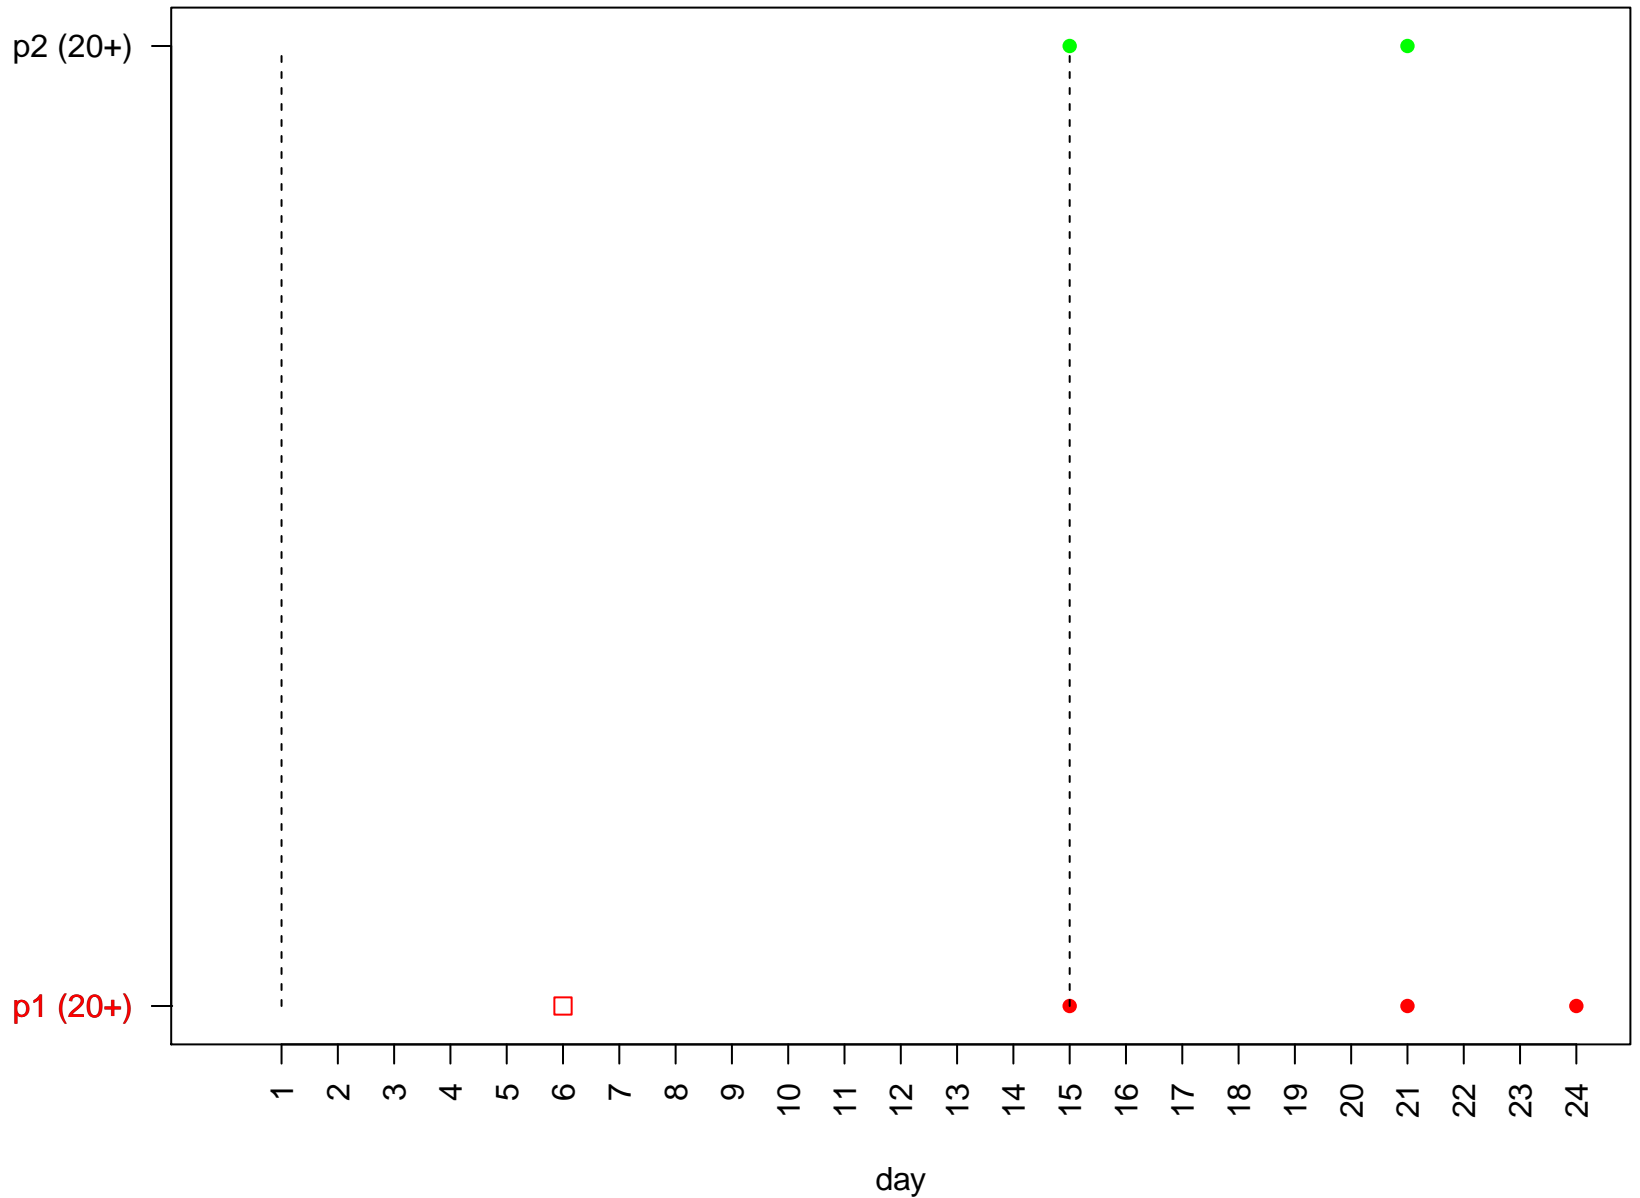

# Household 313

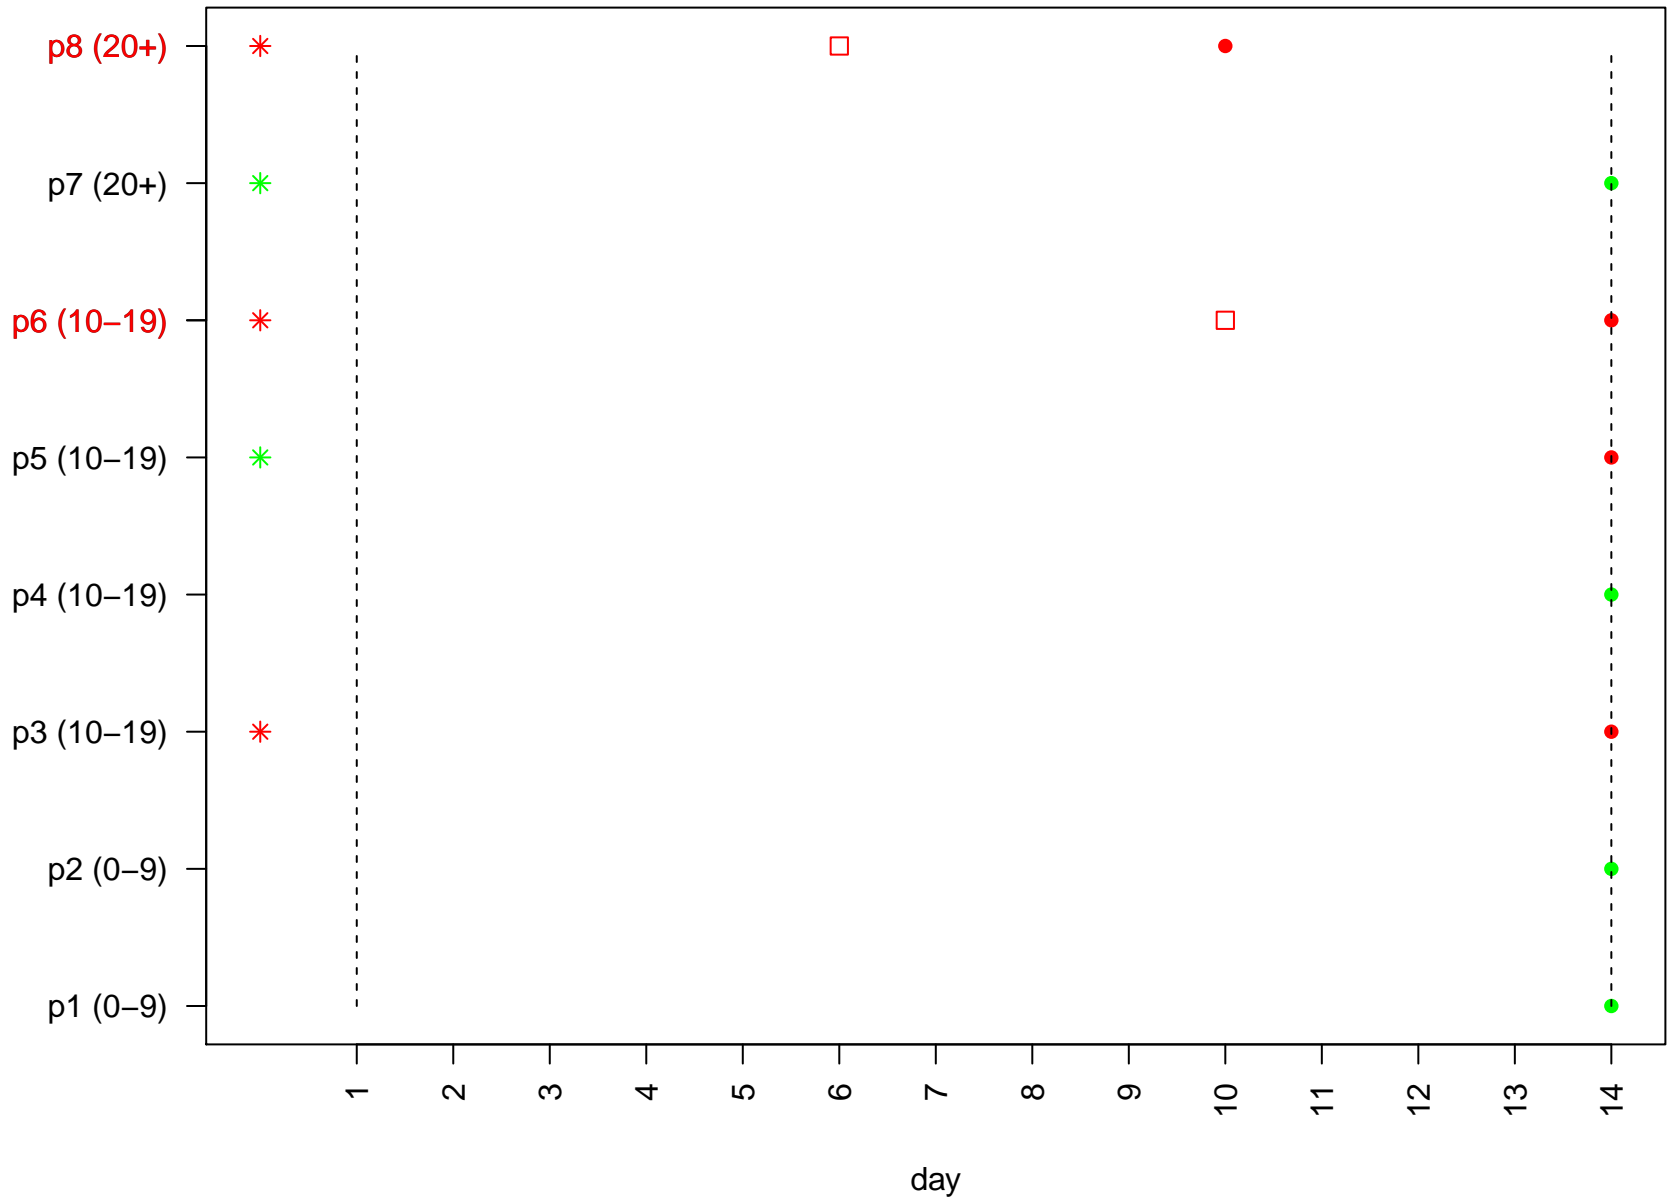

# Household 315

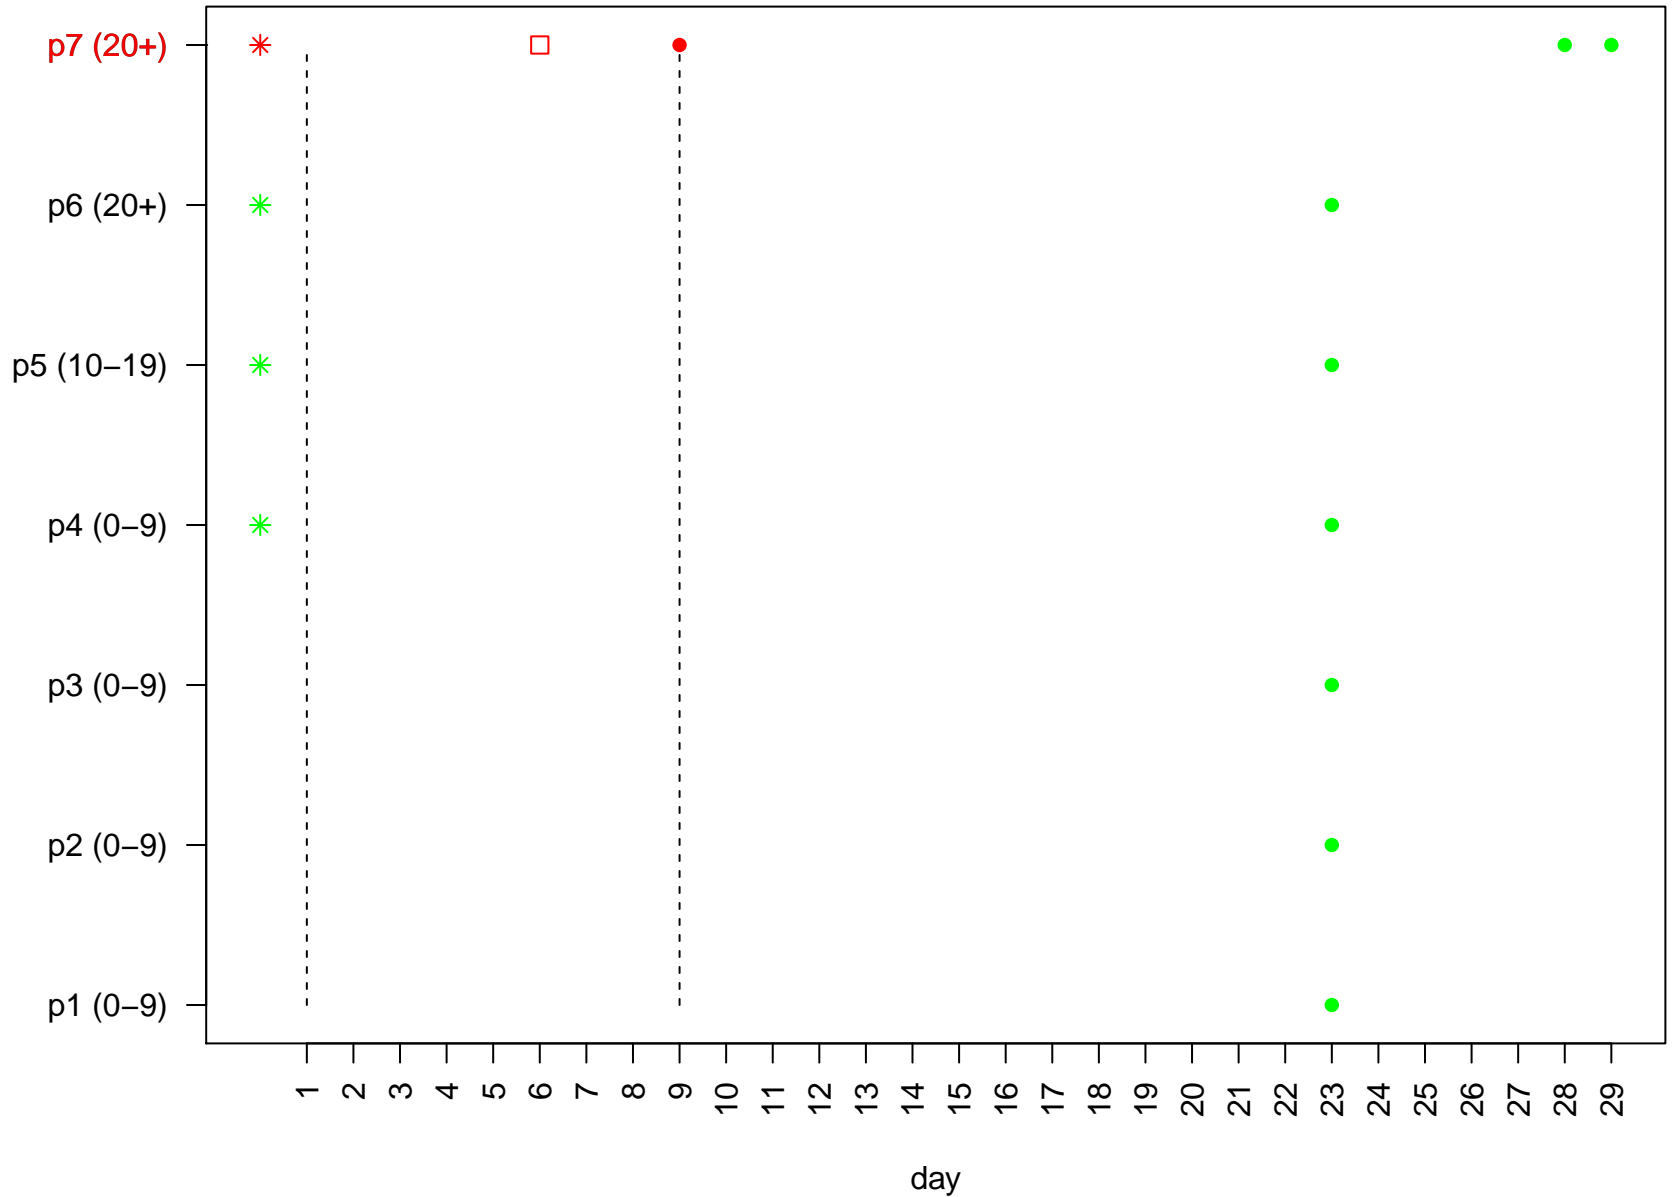



# Household 317

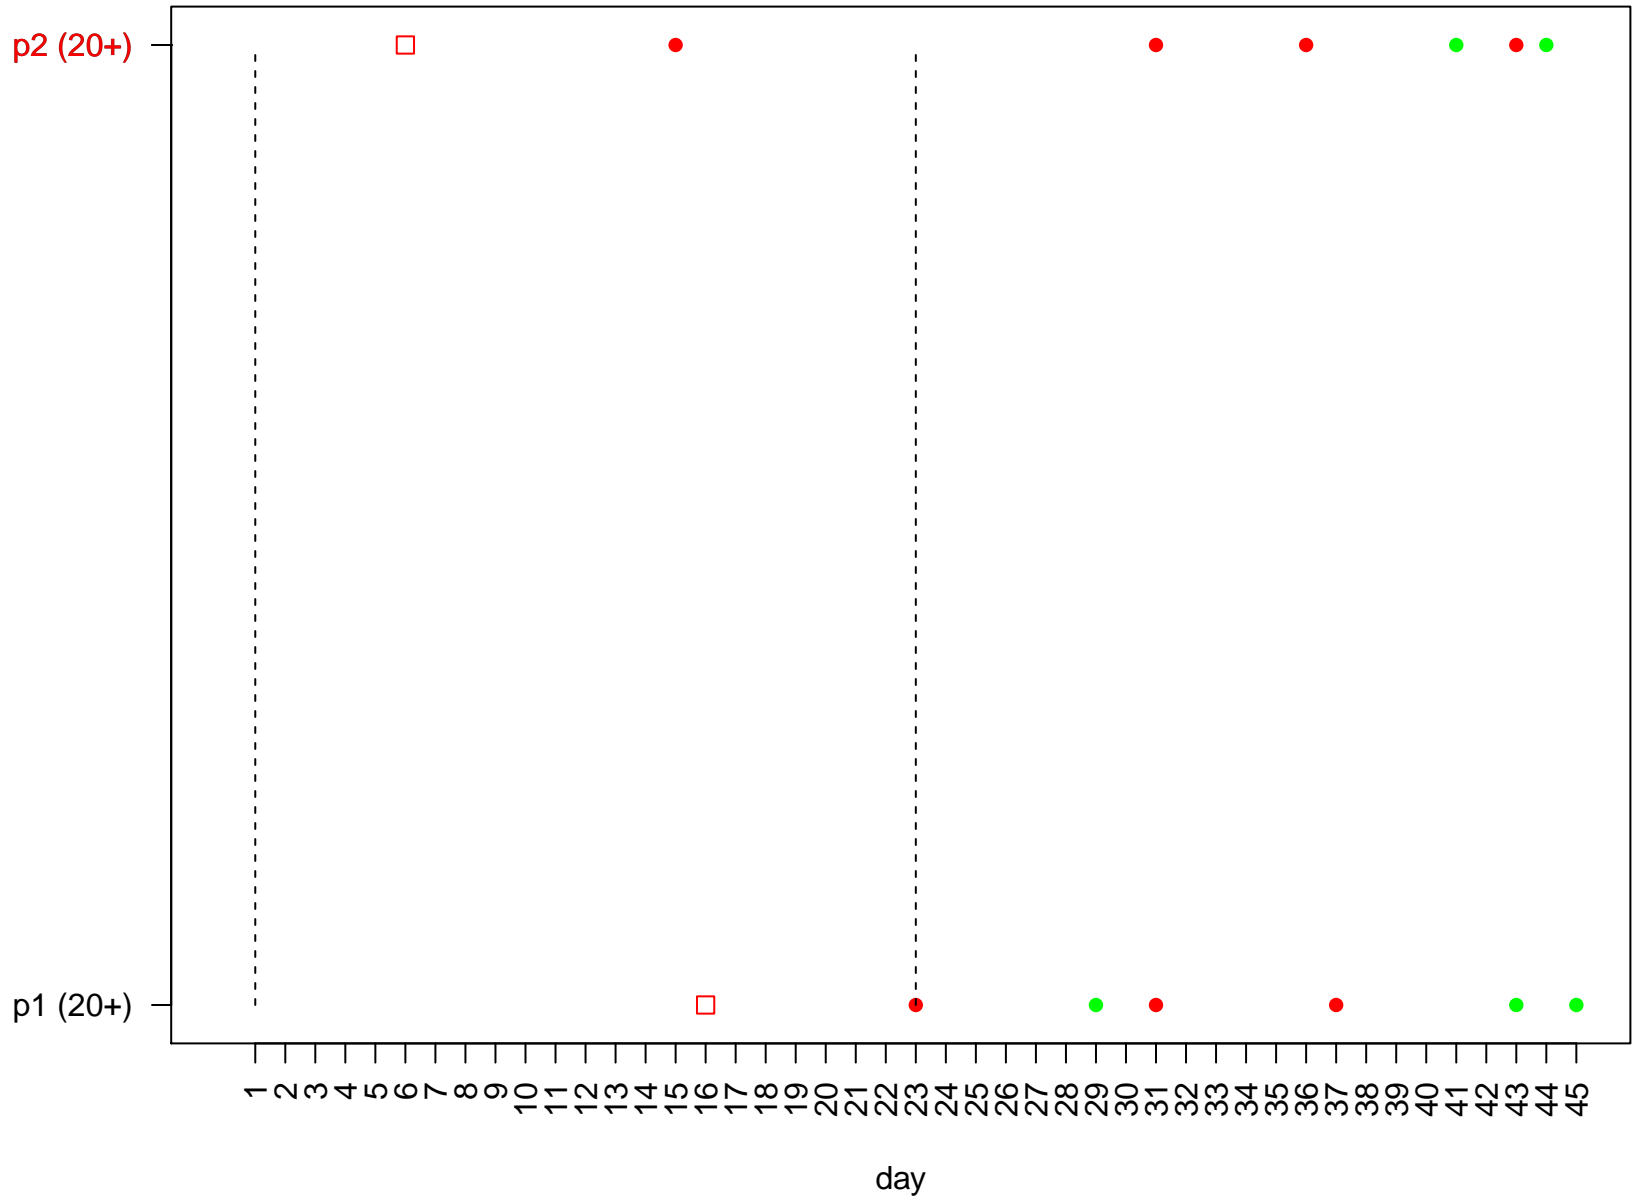



# Household 318

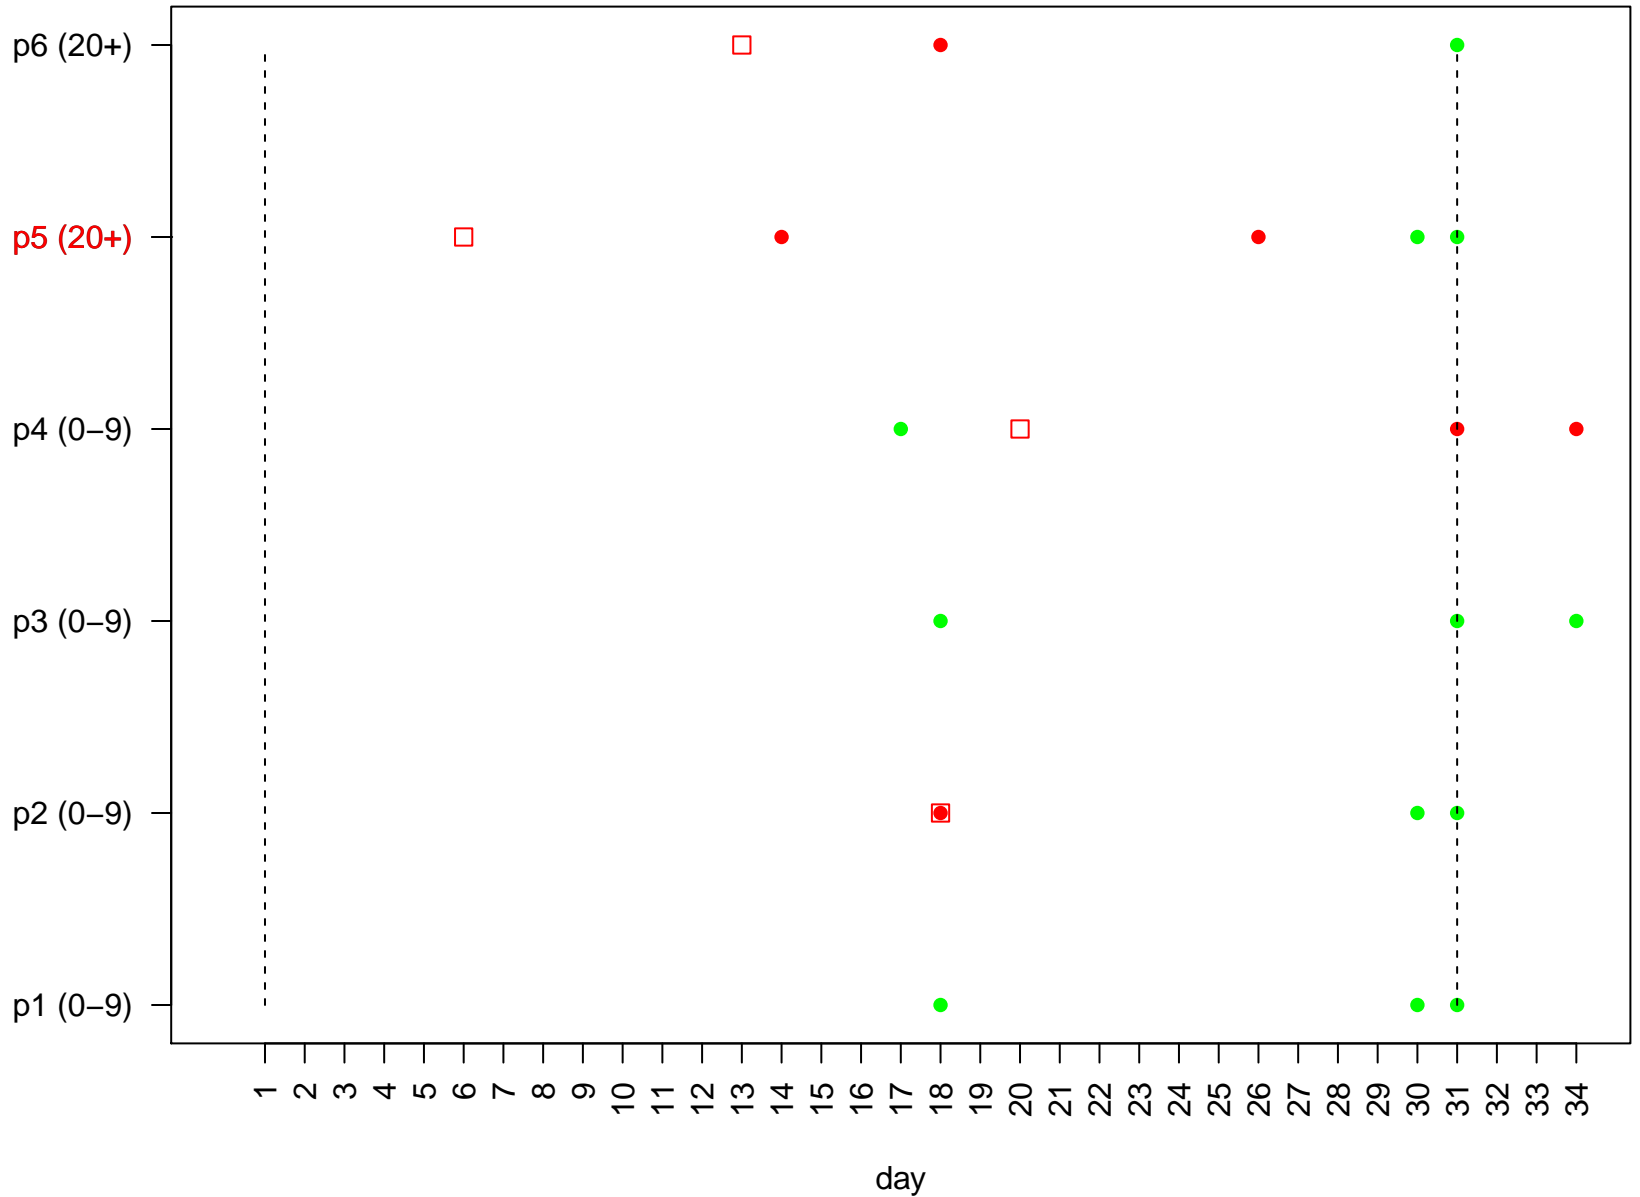

# Household 319

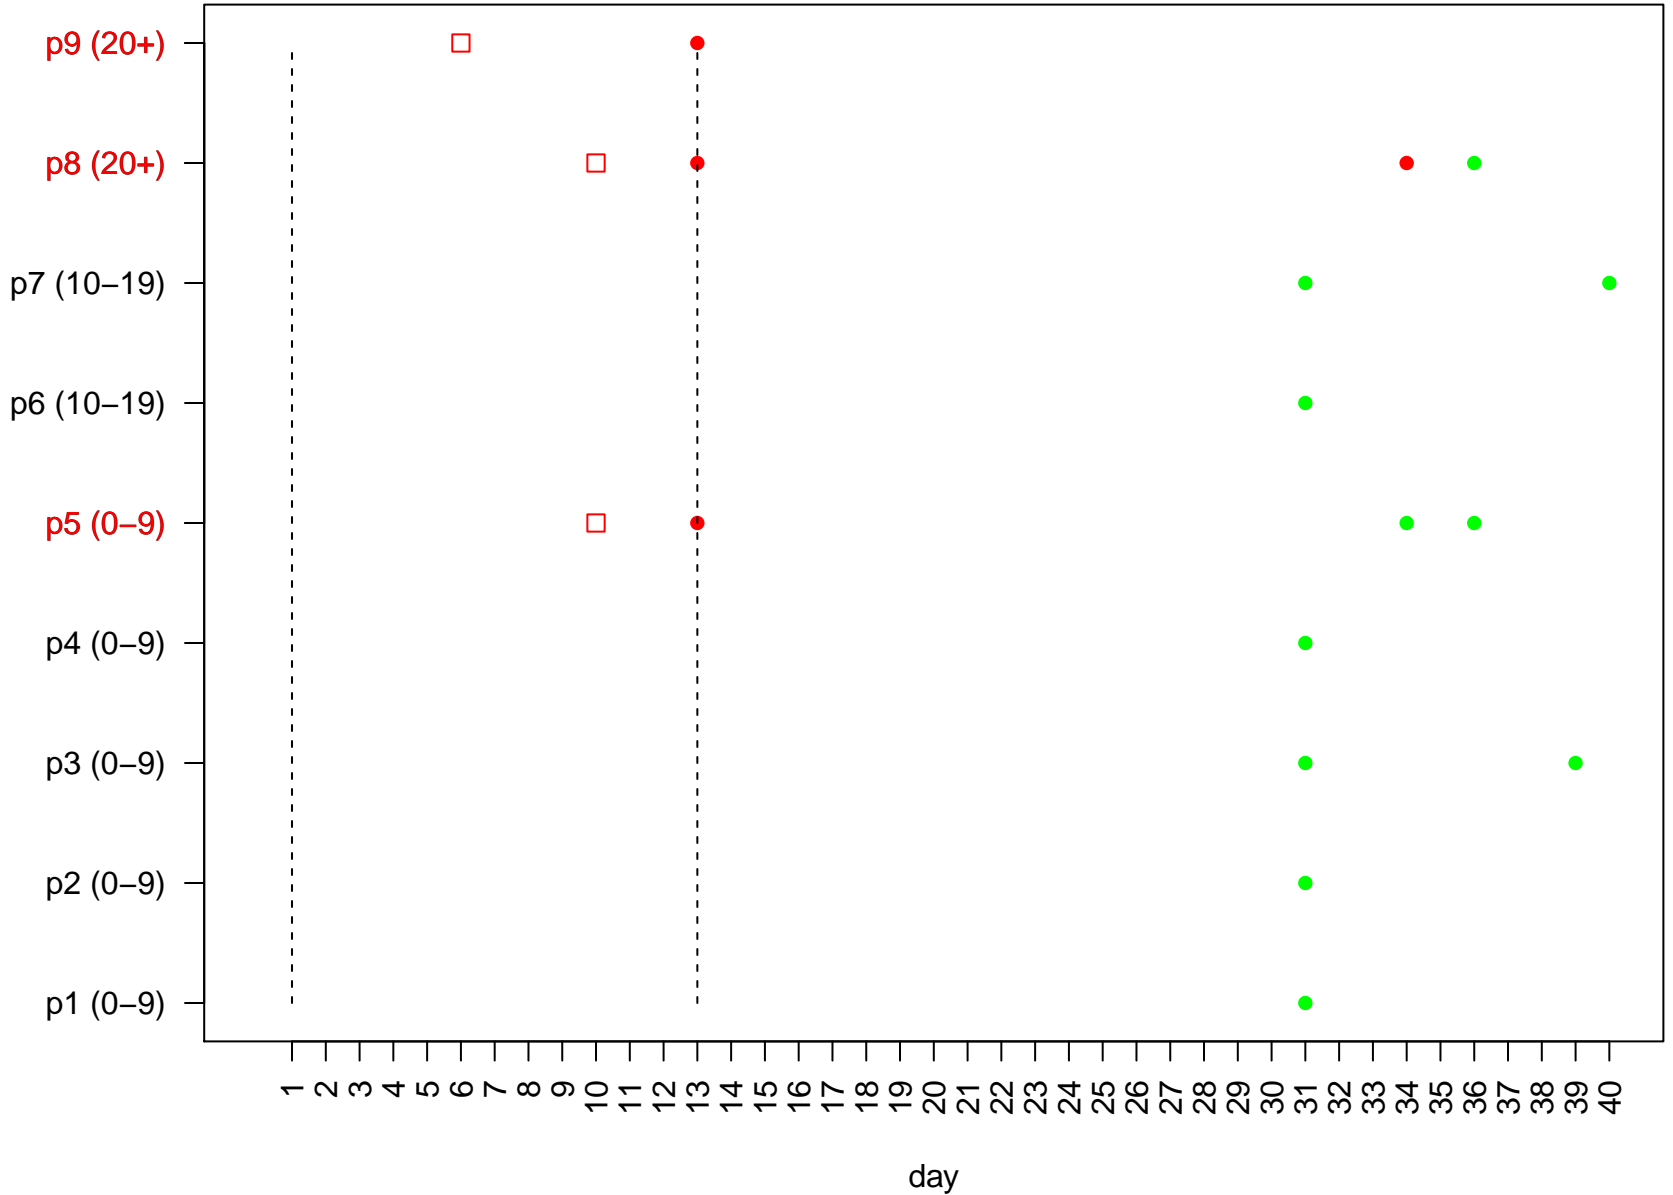

# Household 320

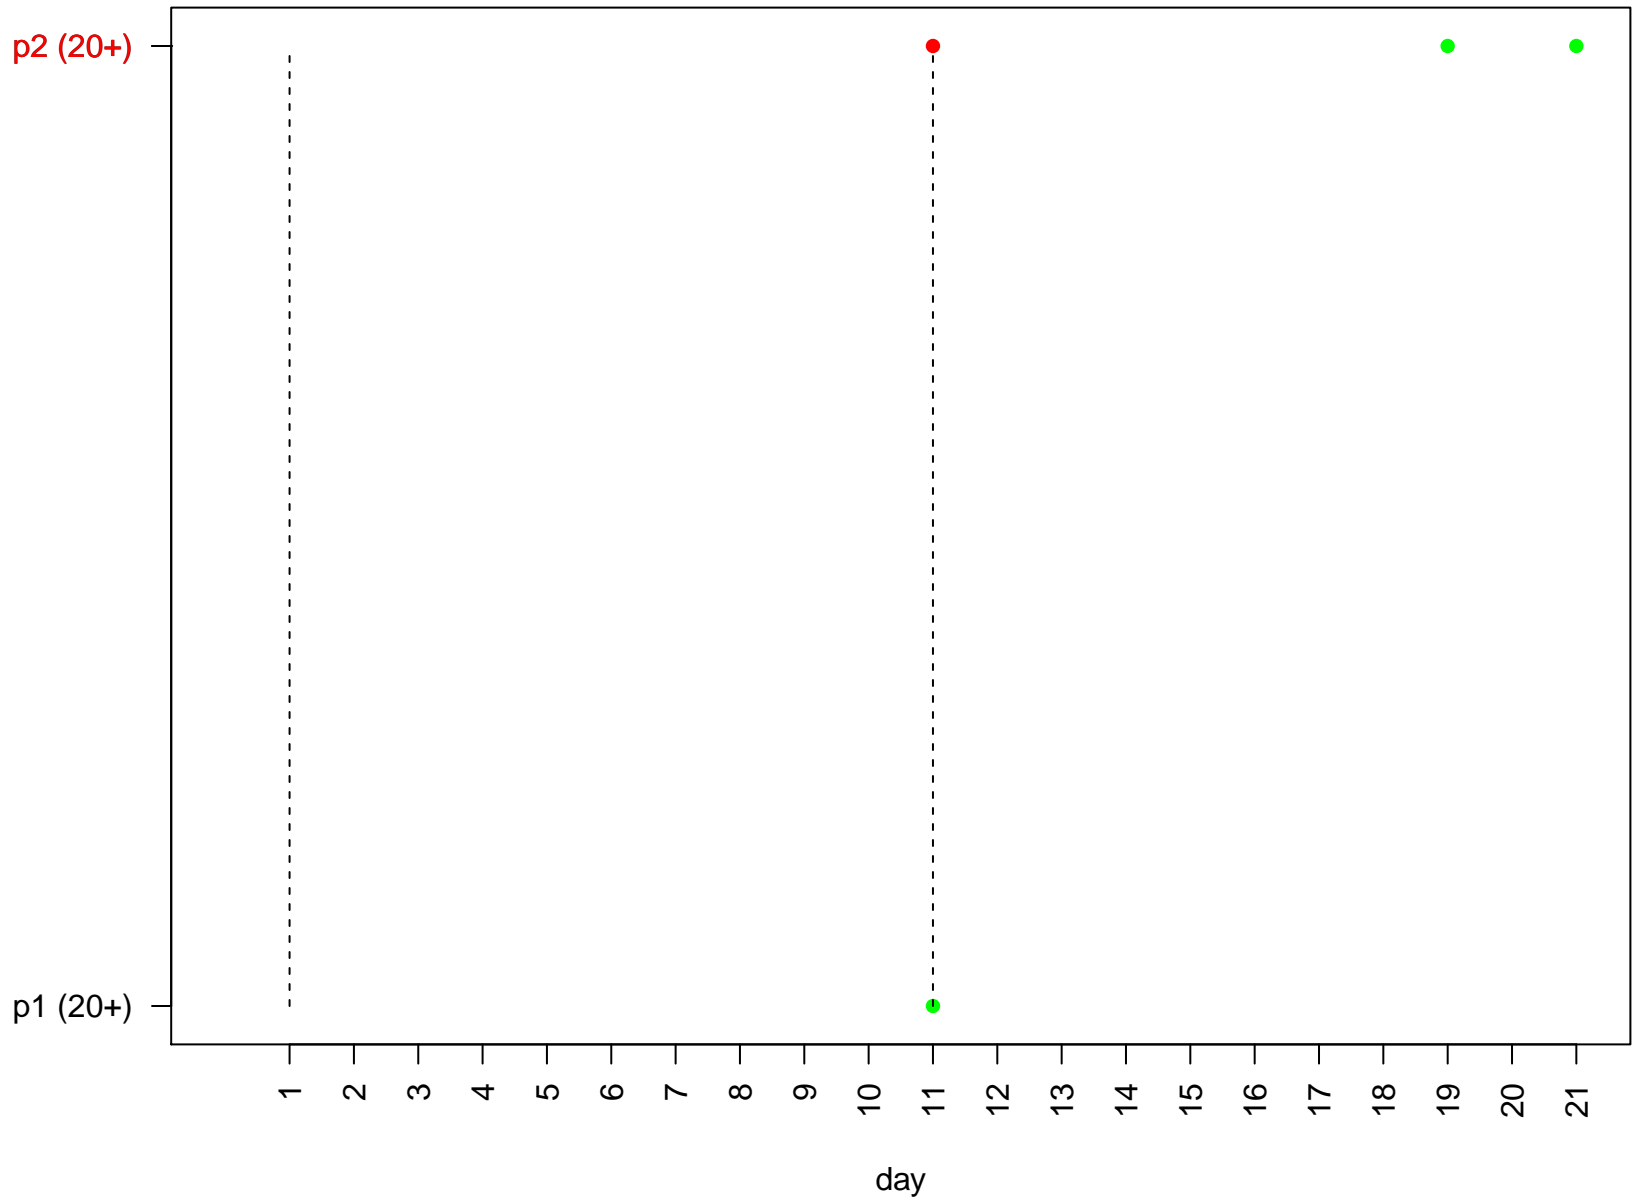

# Household 321

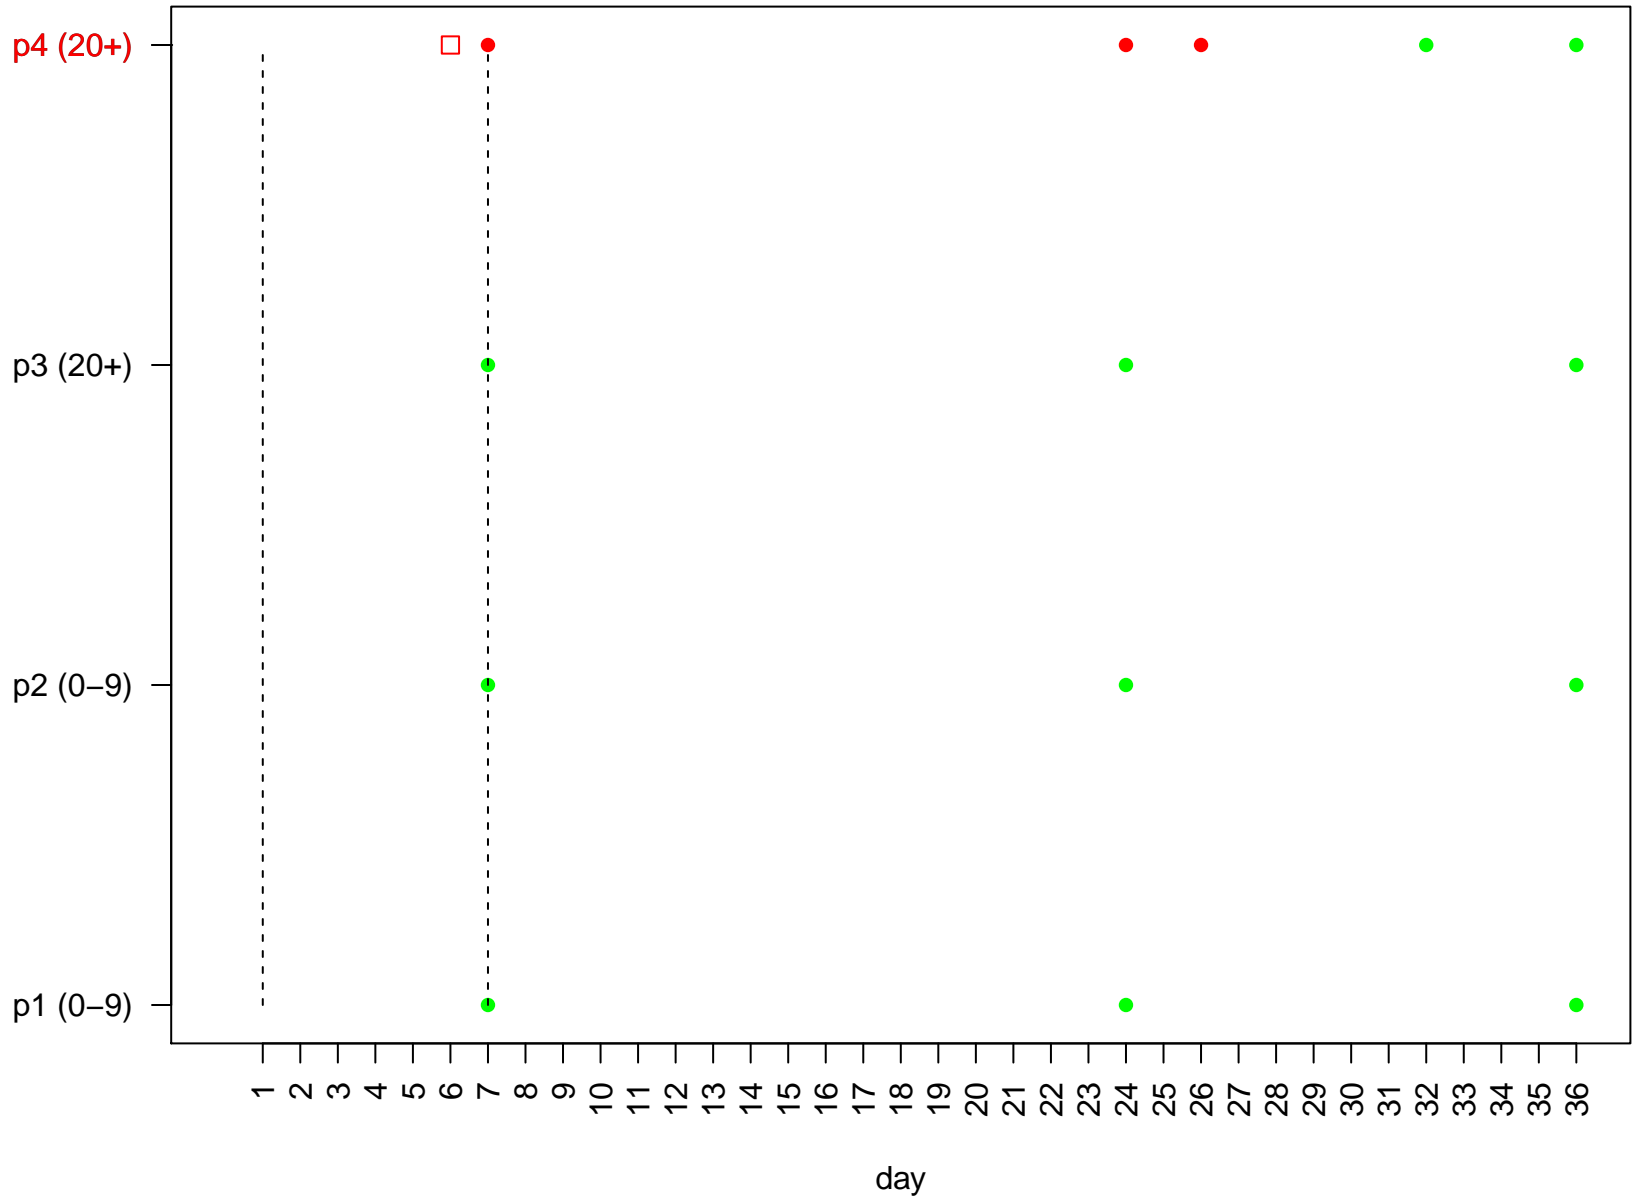



# Household 324

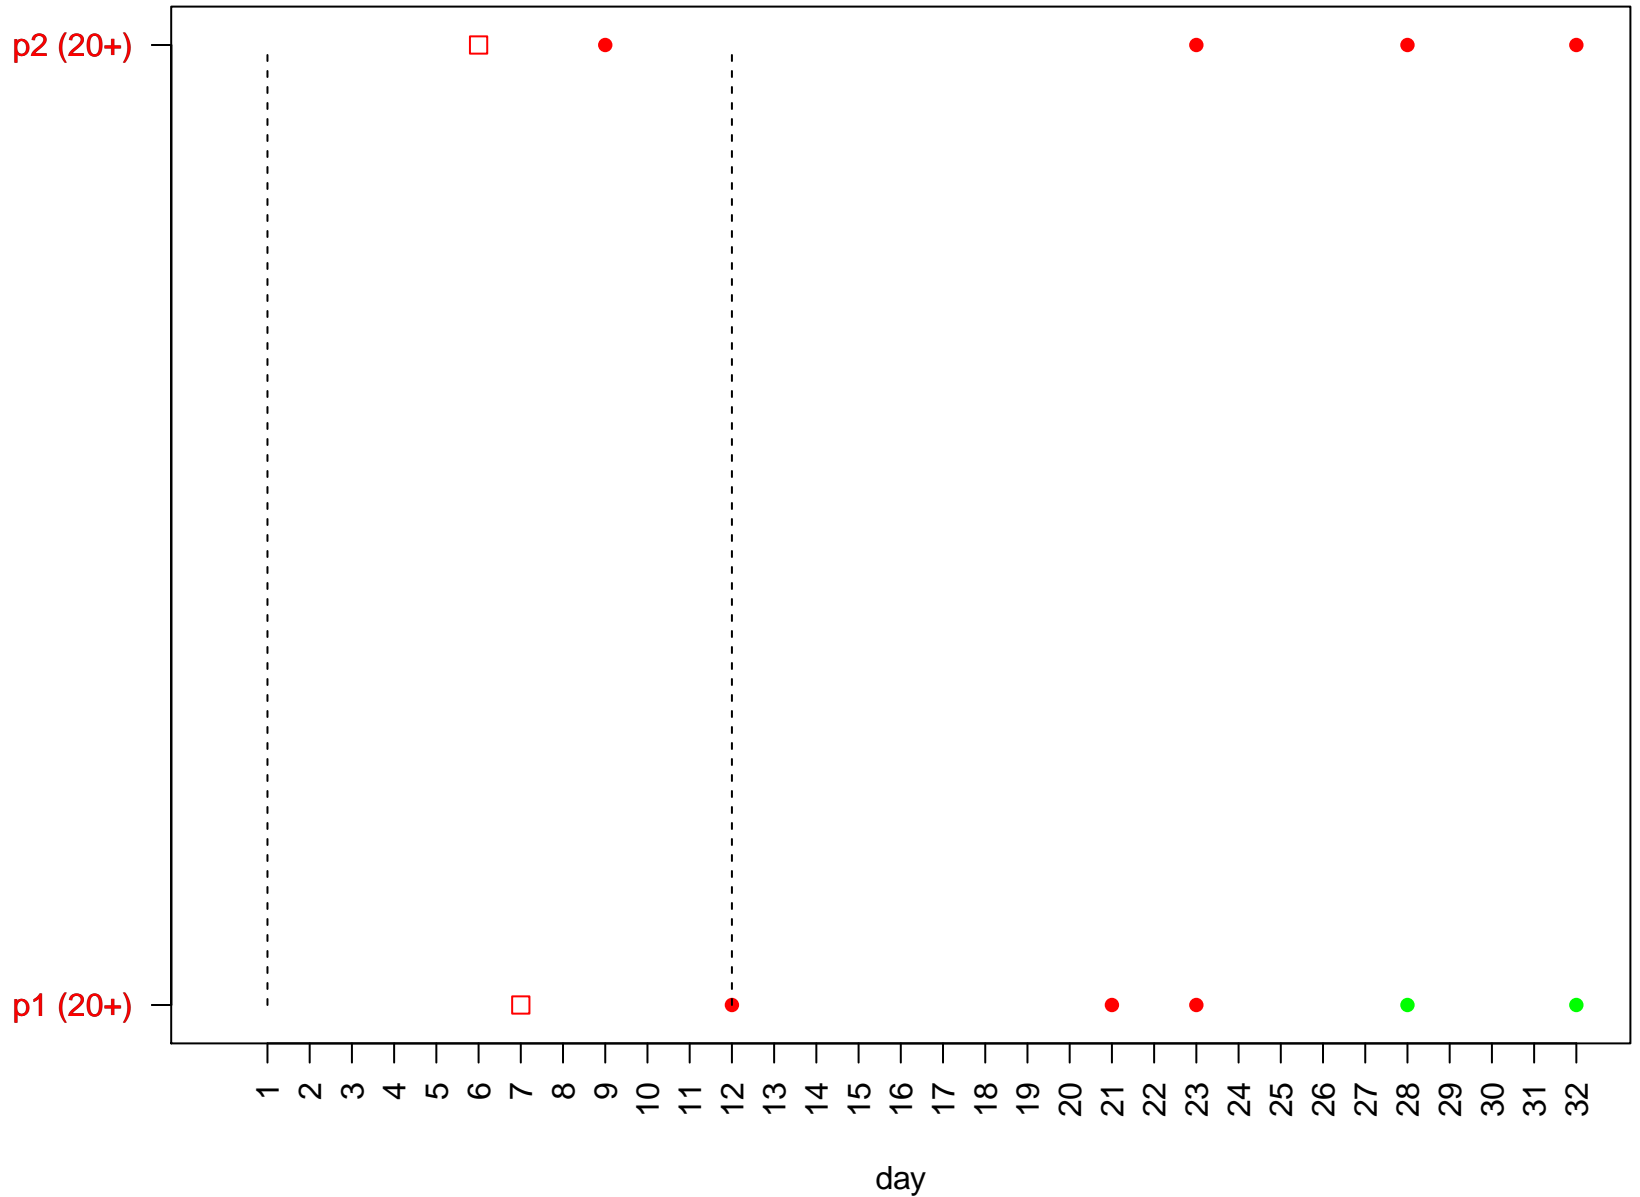

# Household 326

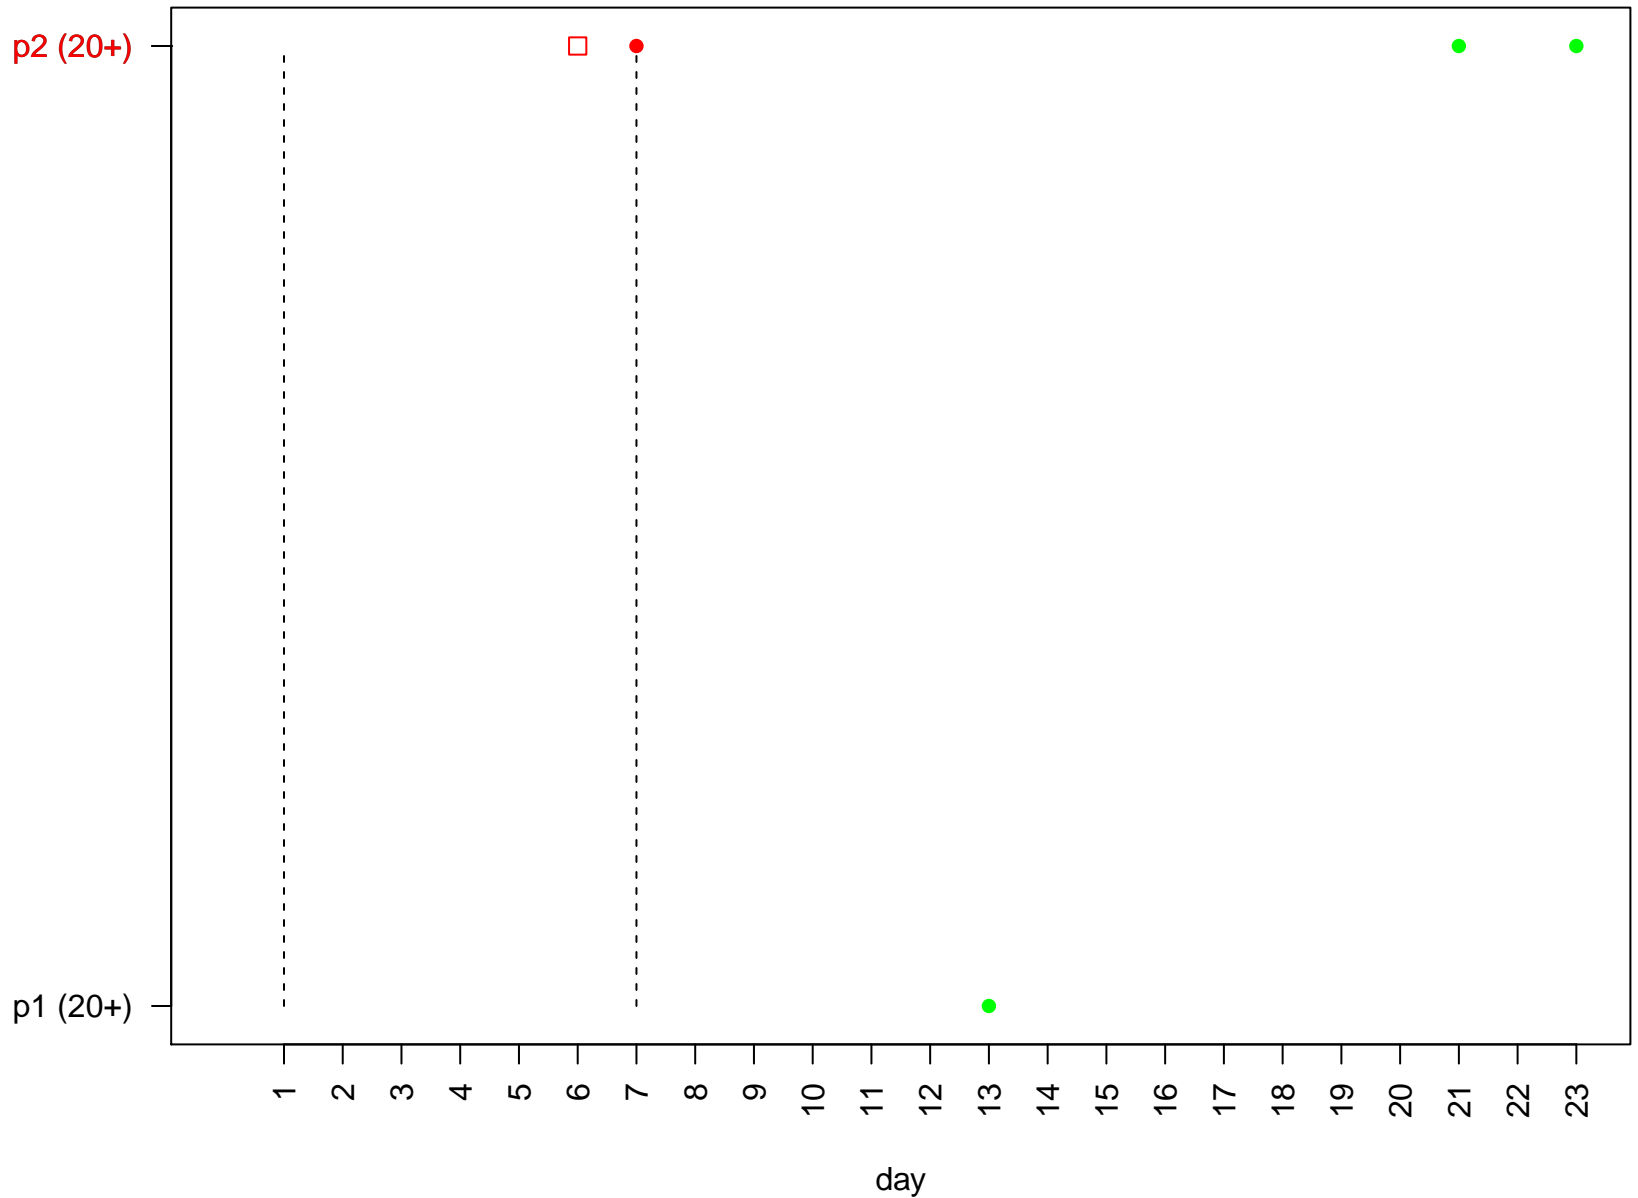

# Household 327

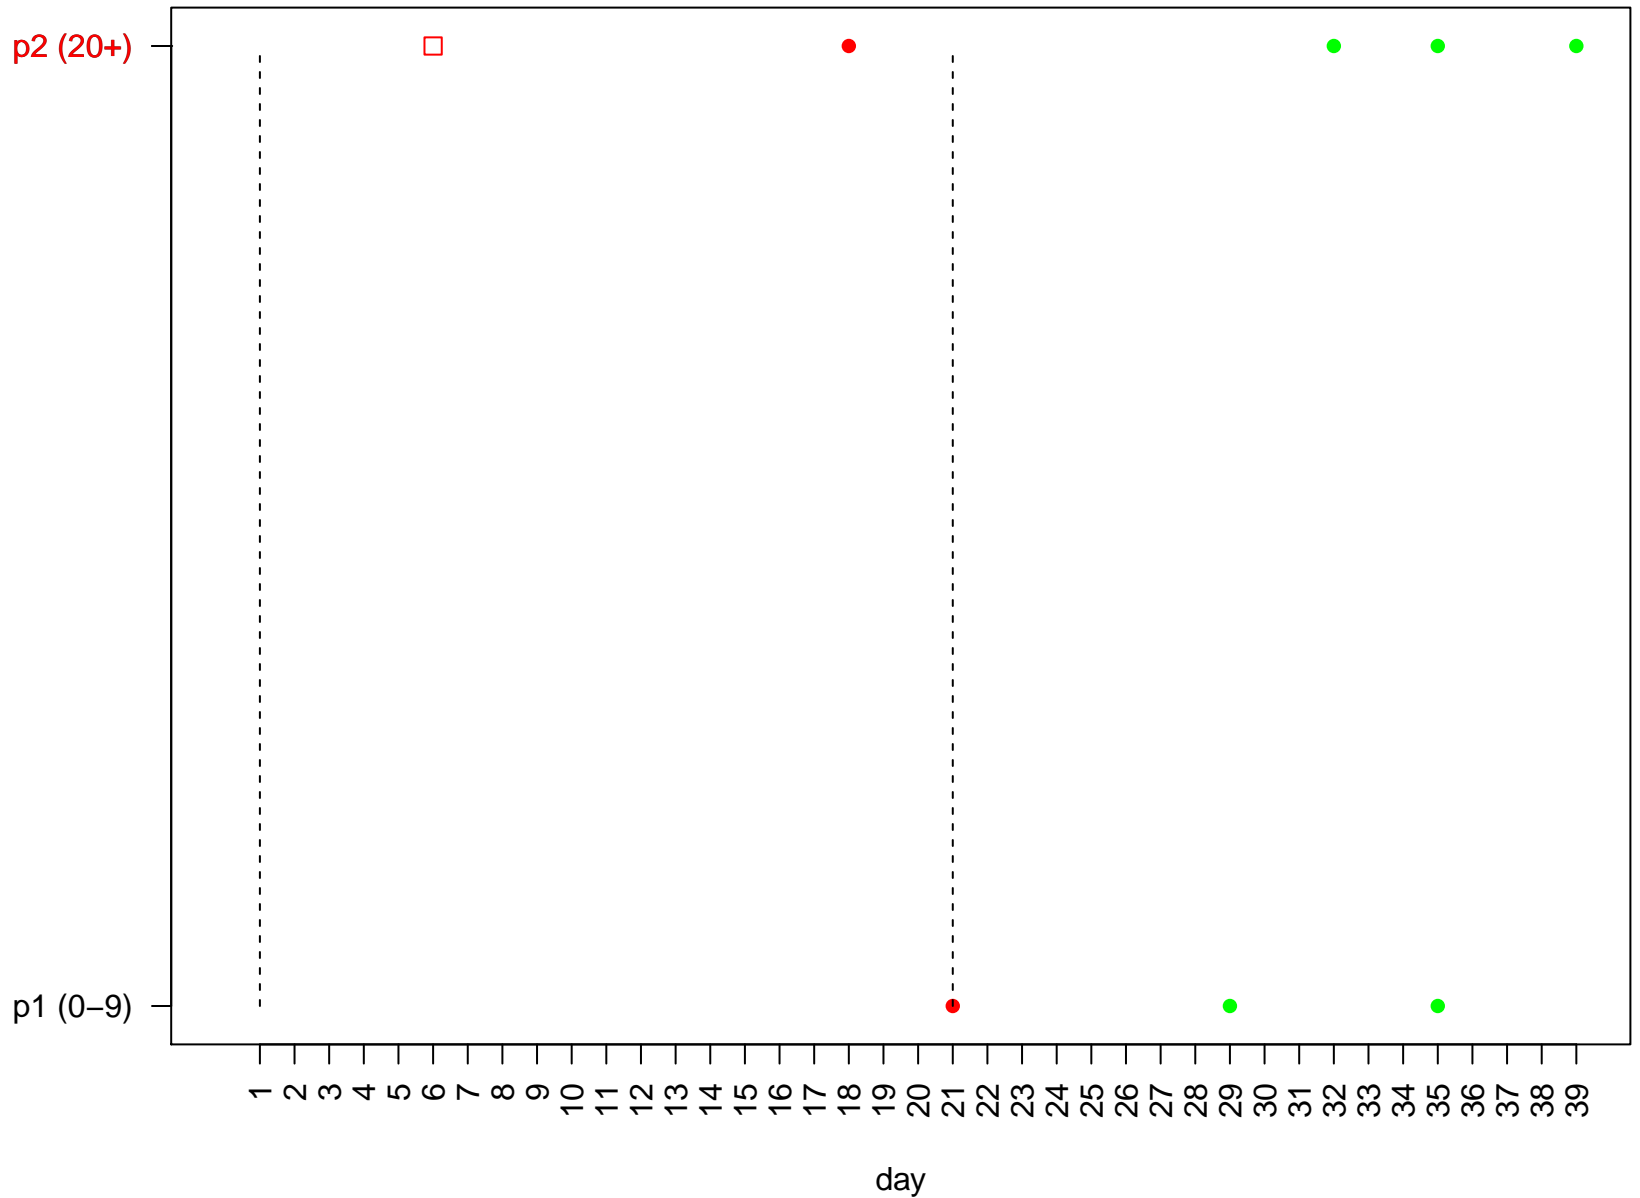



# Household 328

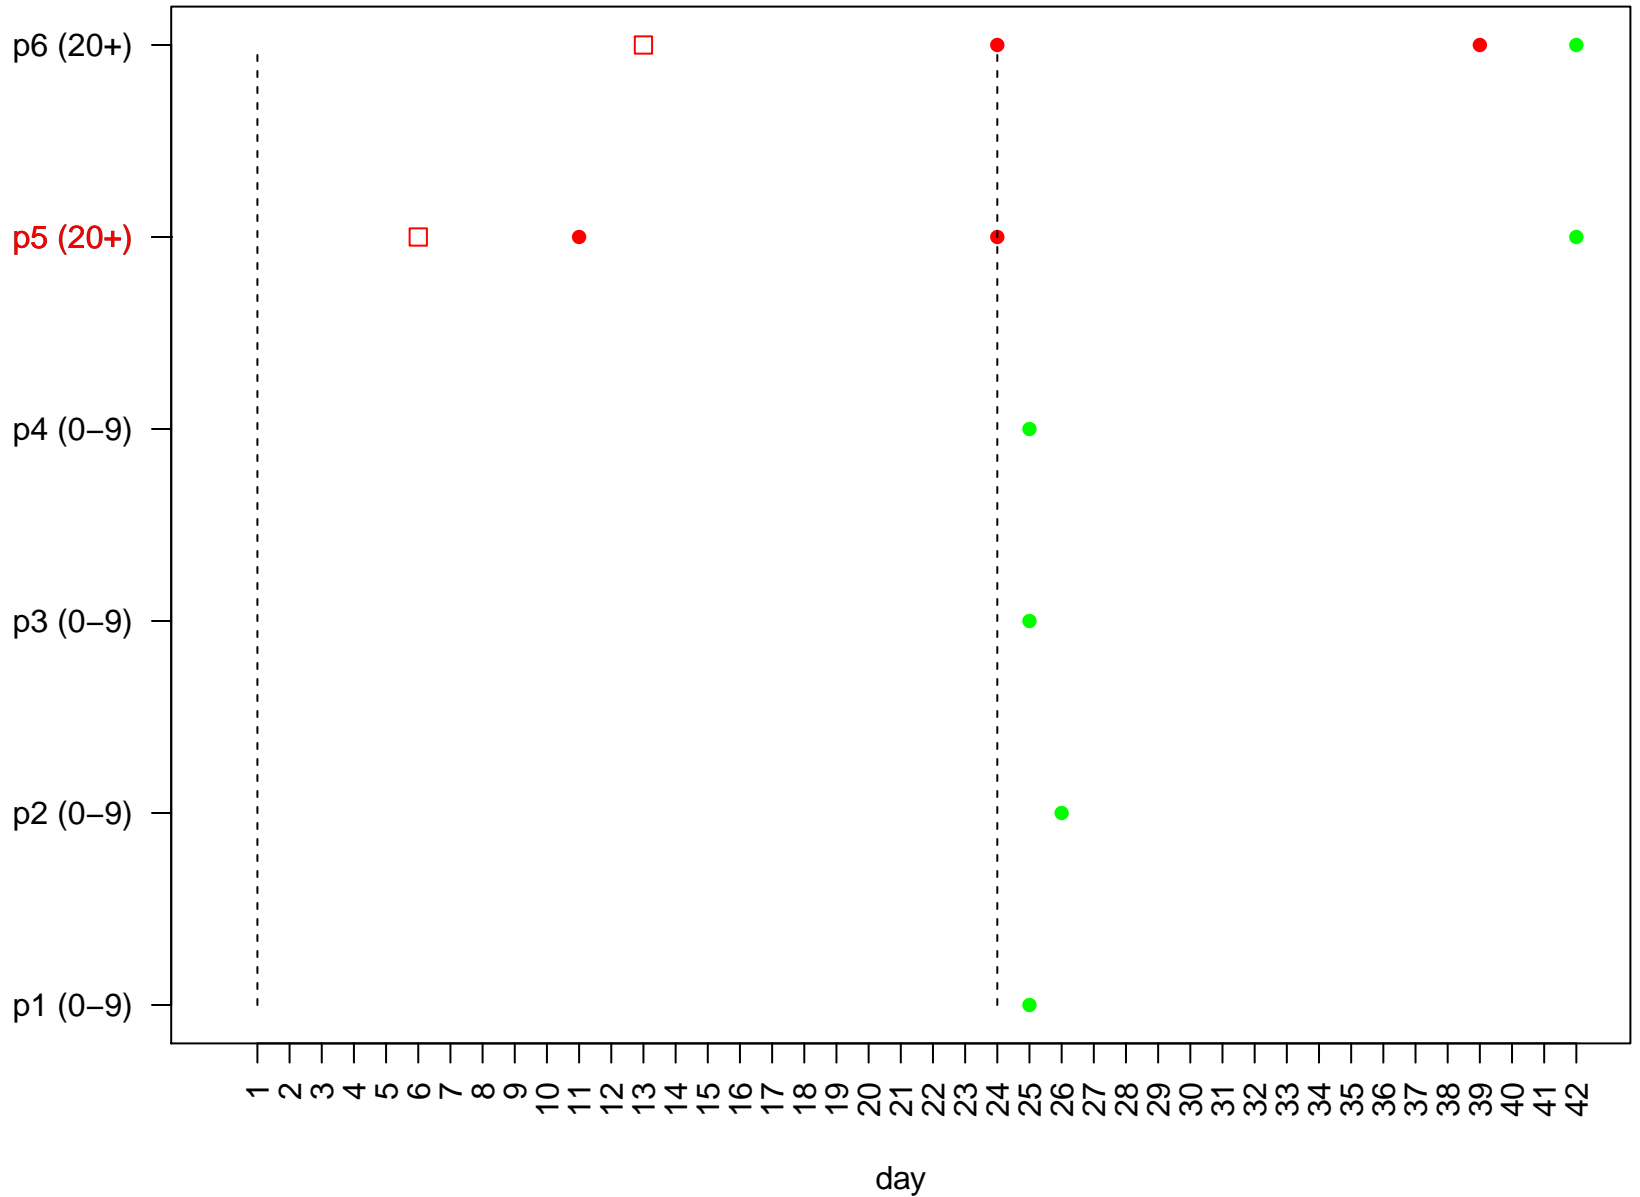

# Household 329

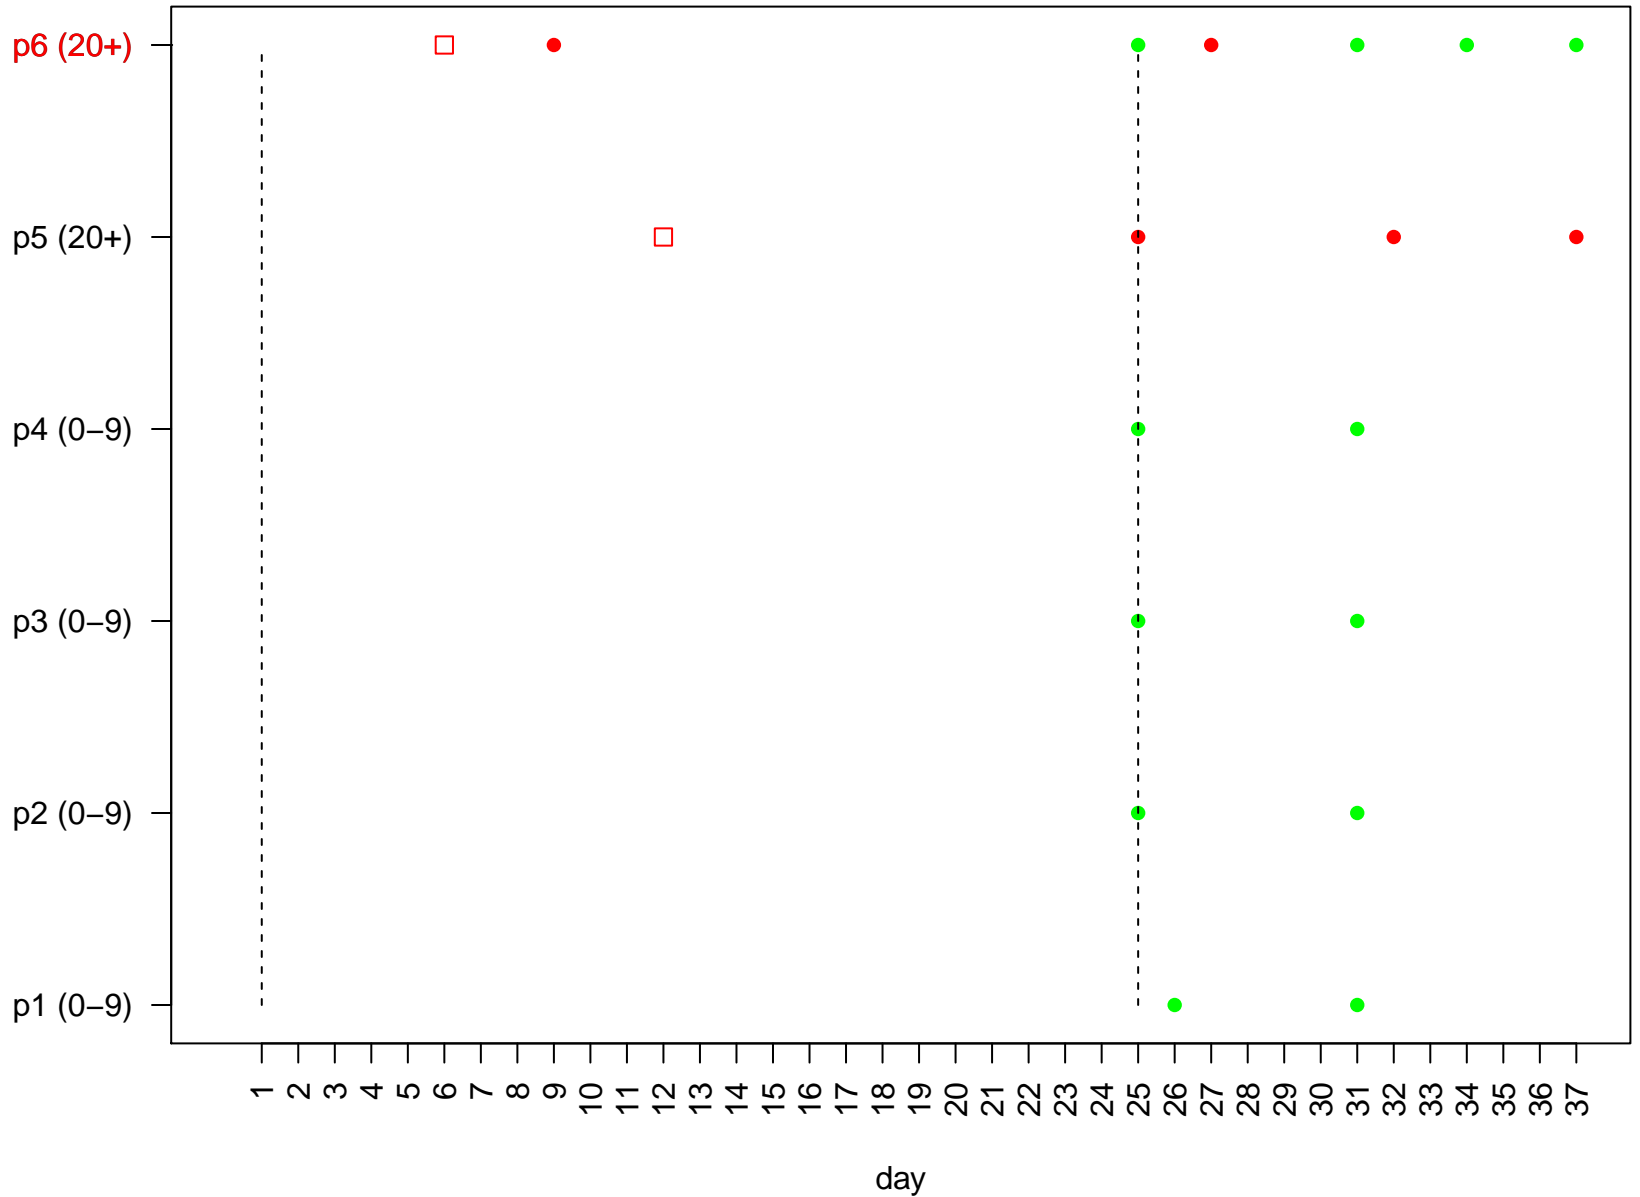

# Household 330

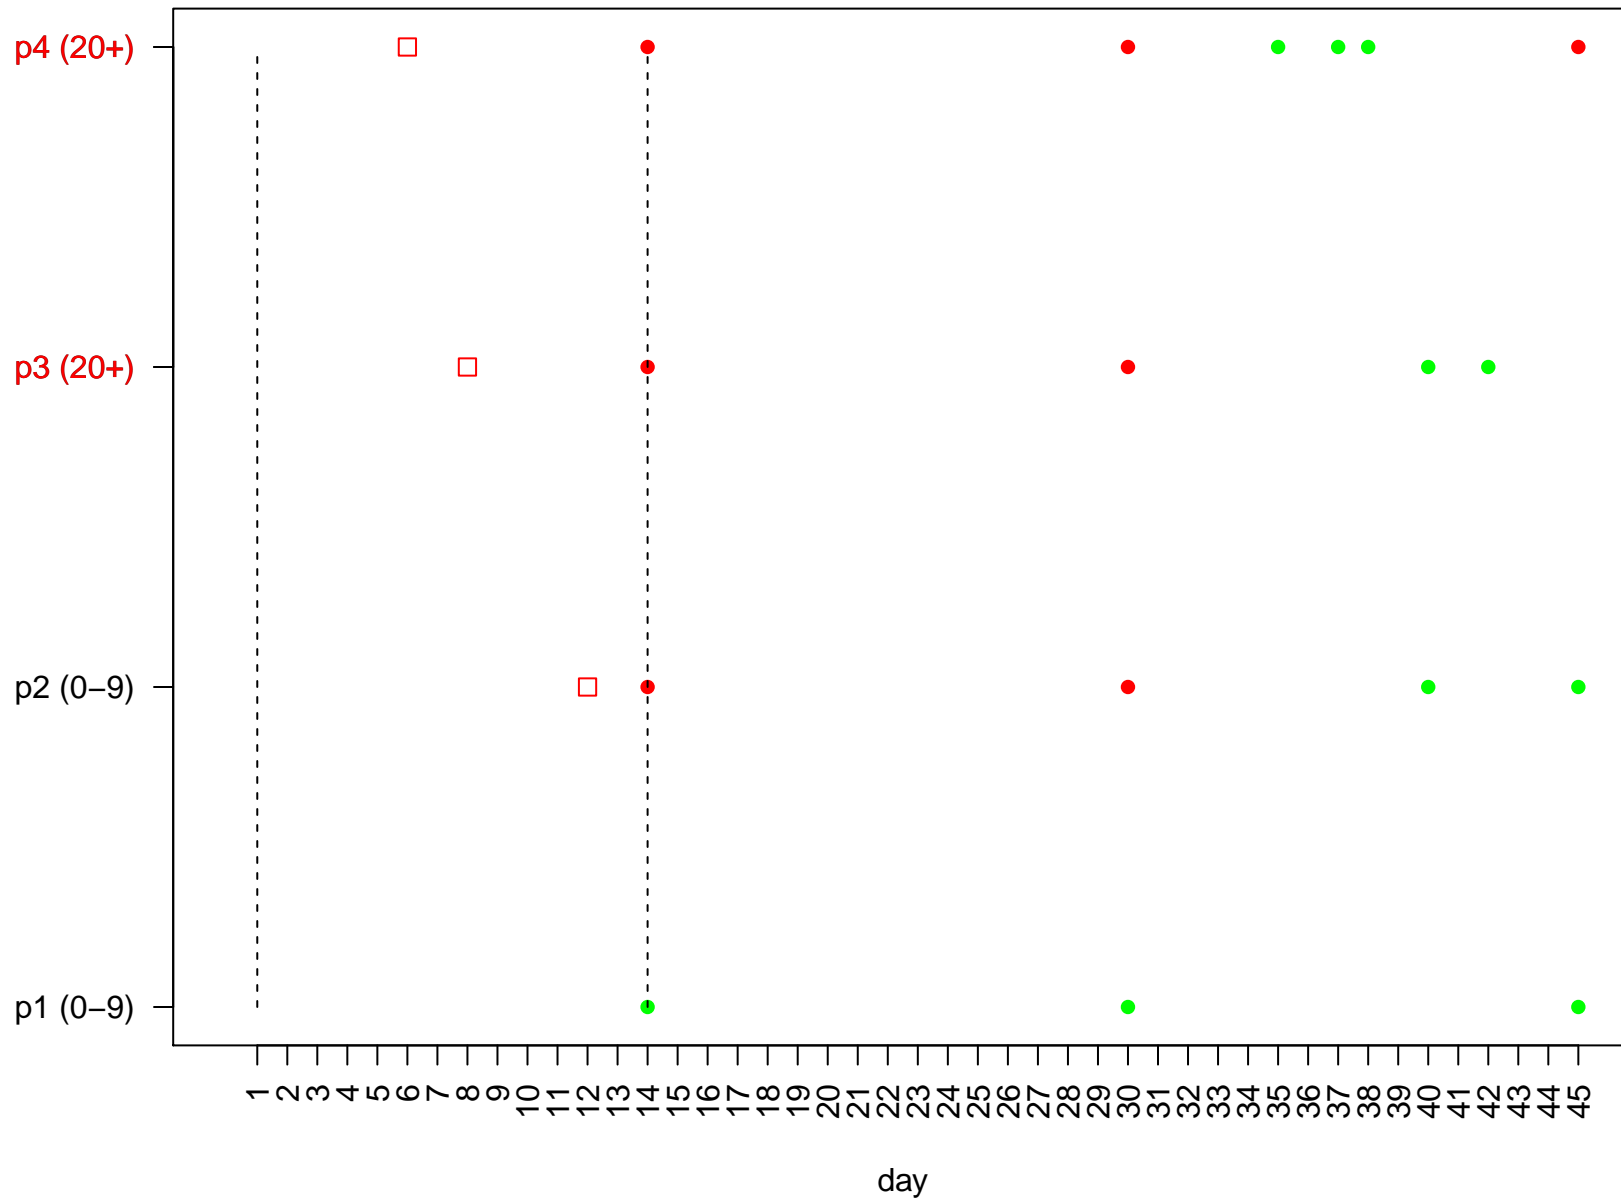

# Household 331

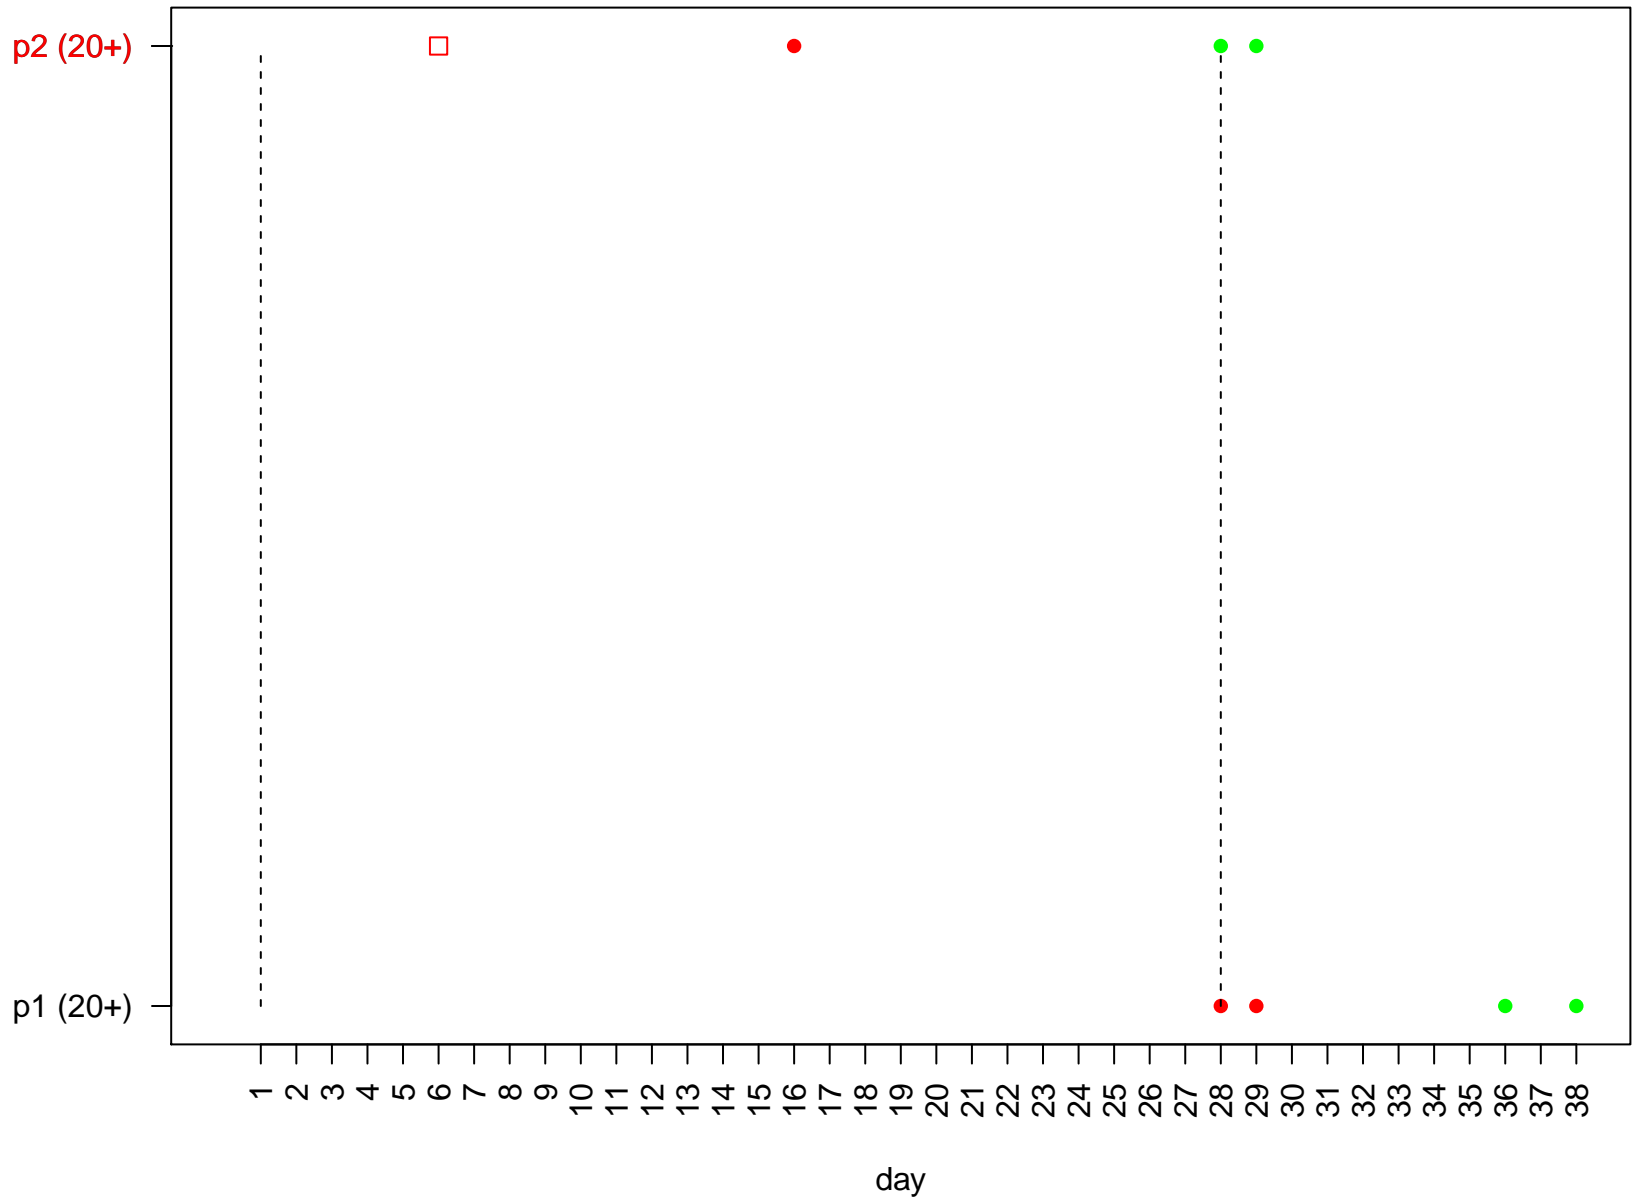

# Household 332

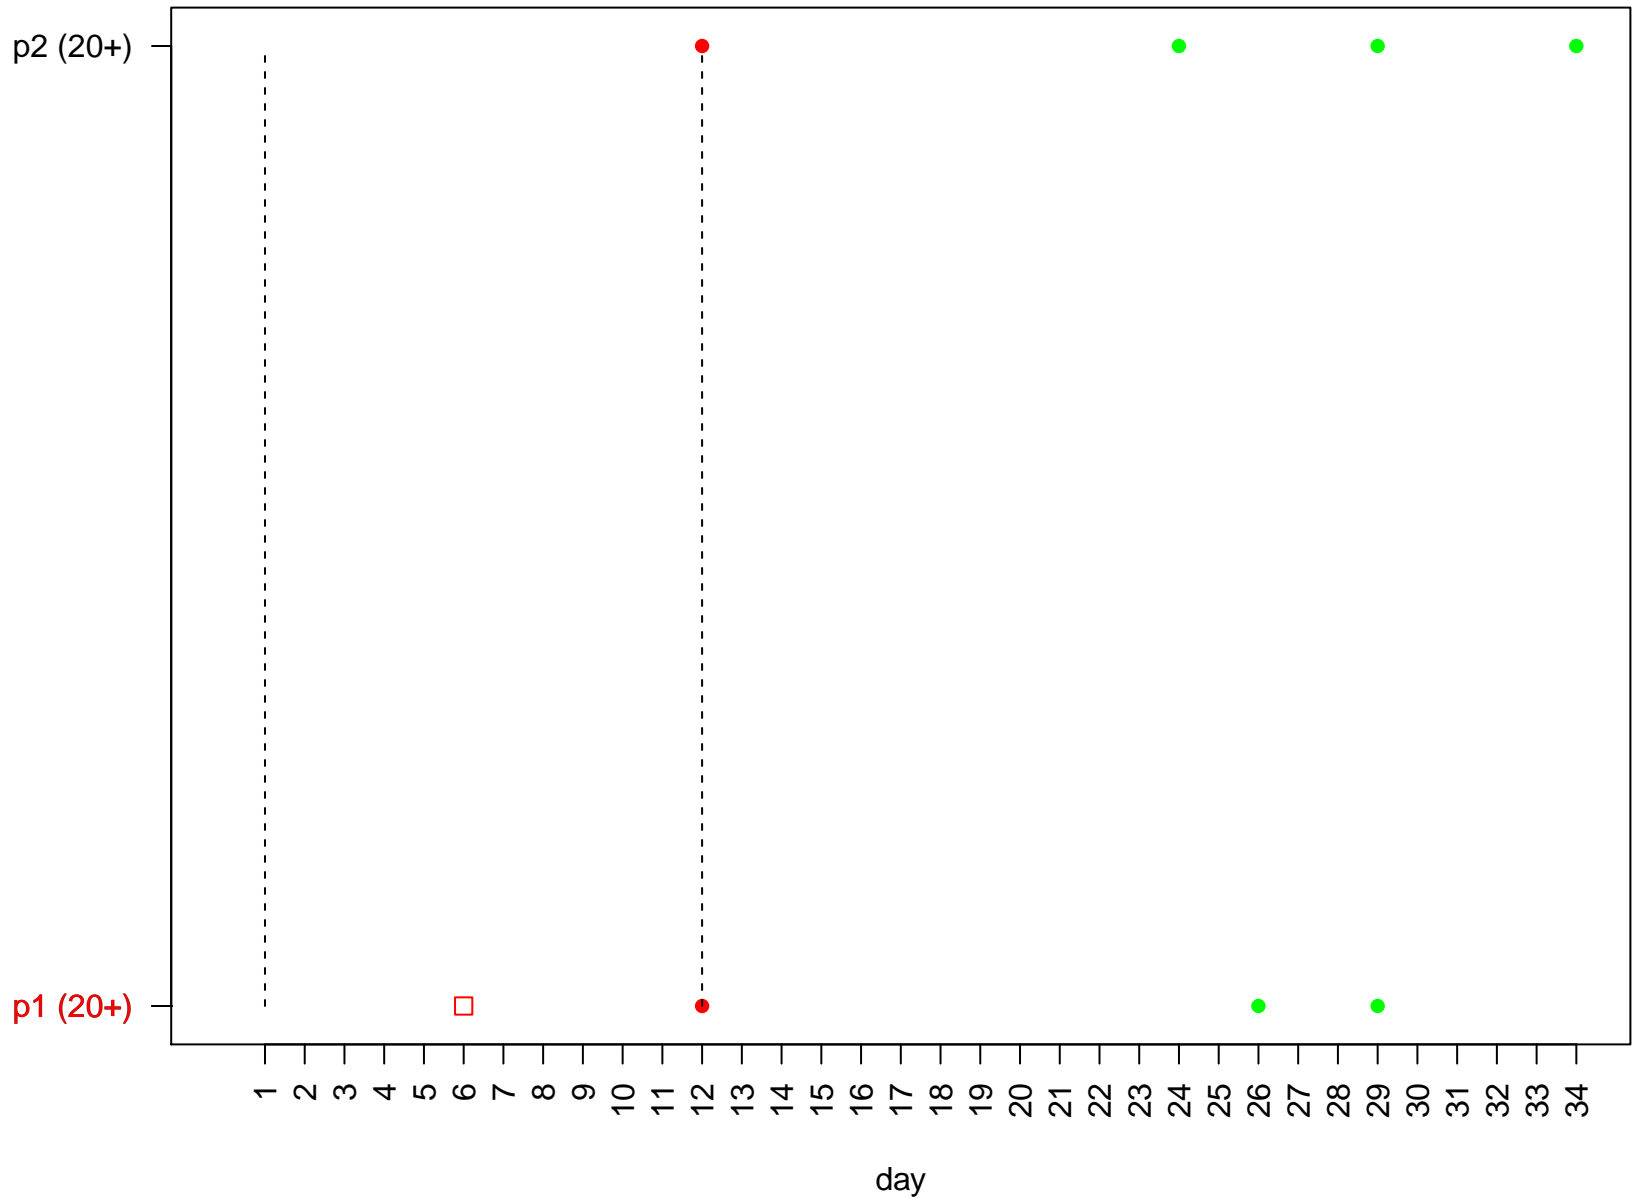

# Household 334

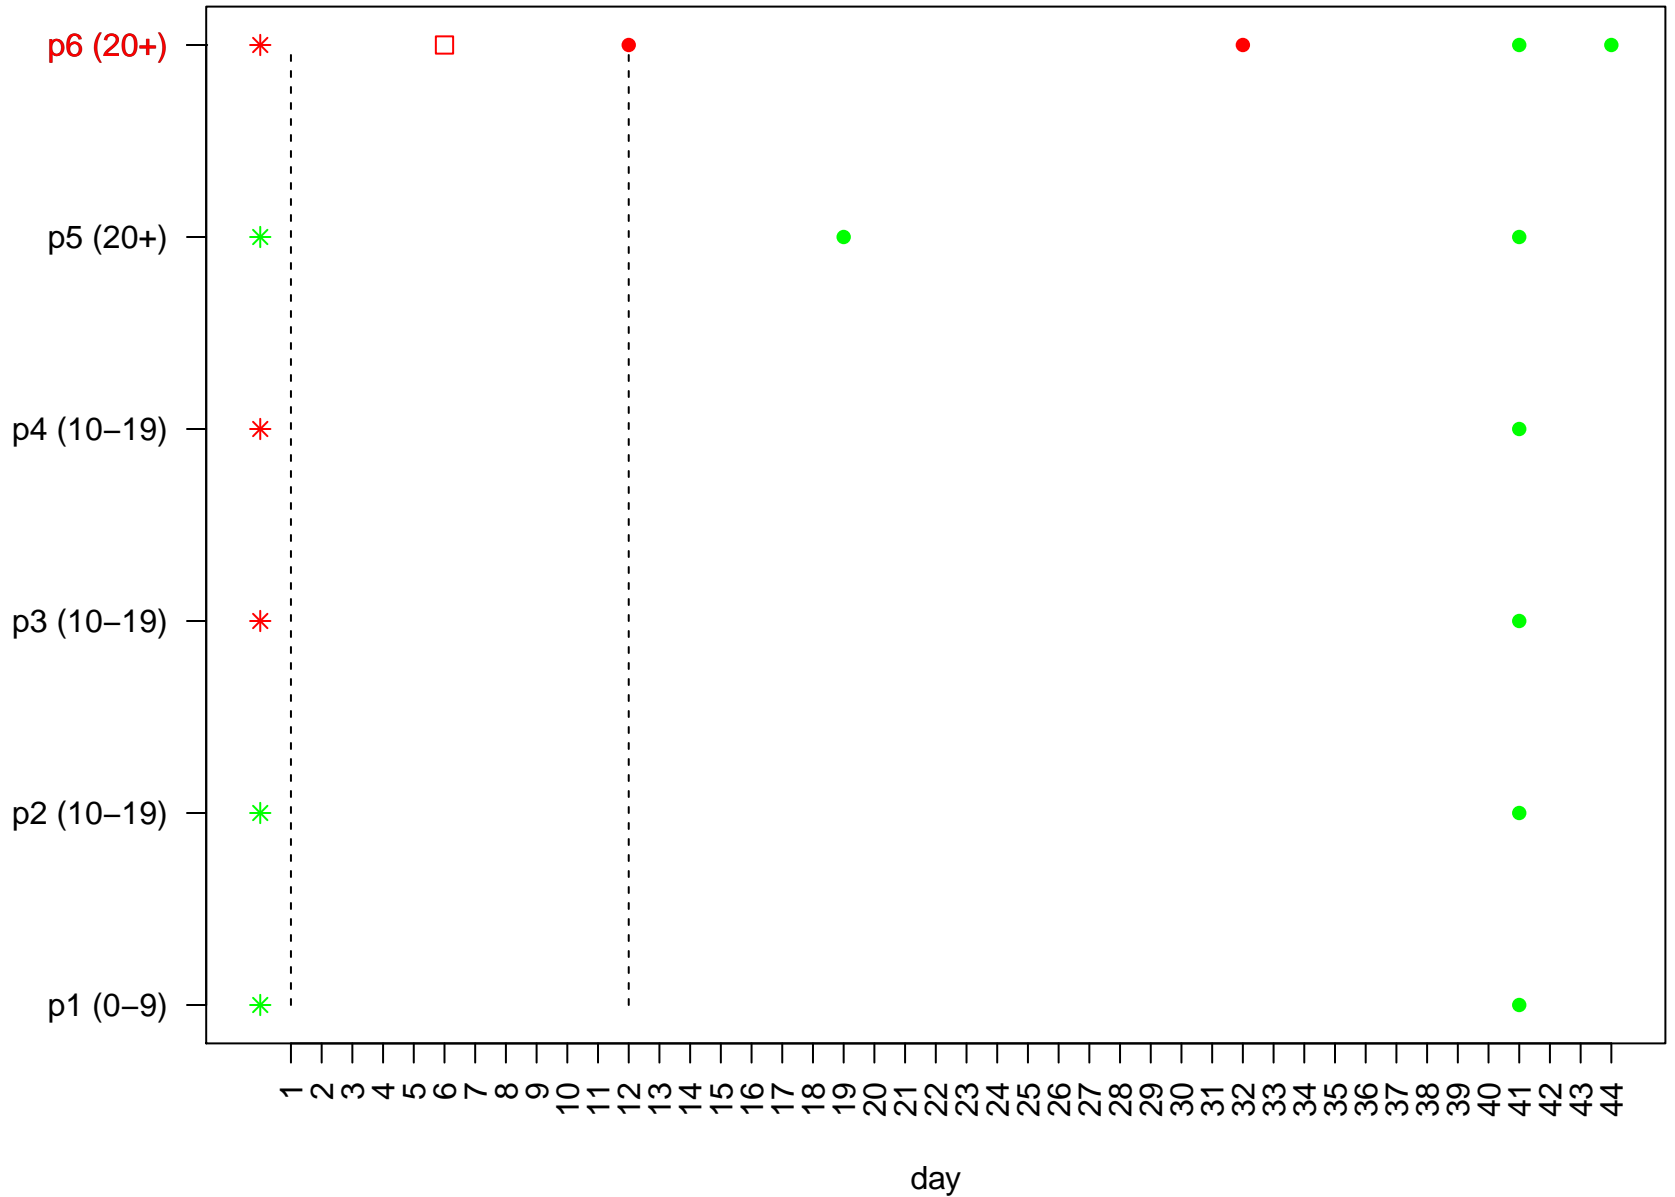

# Household 335

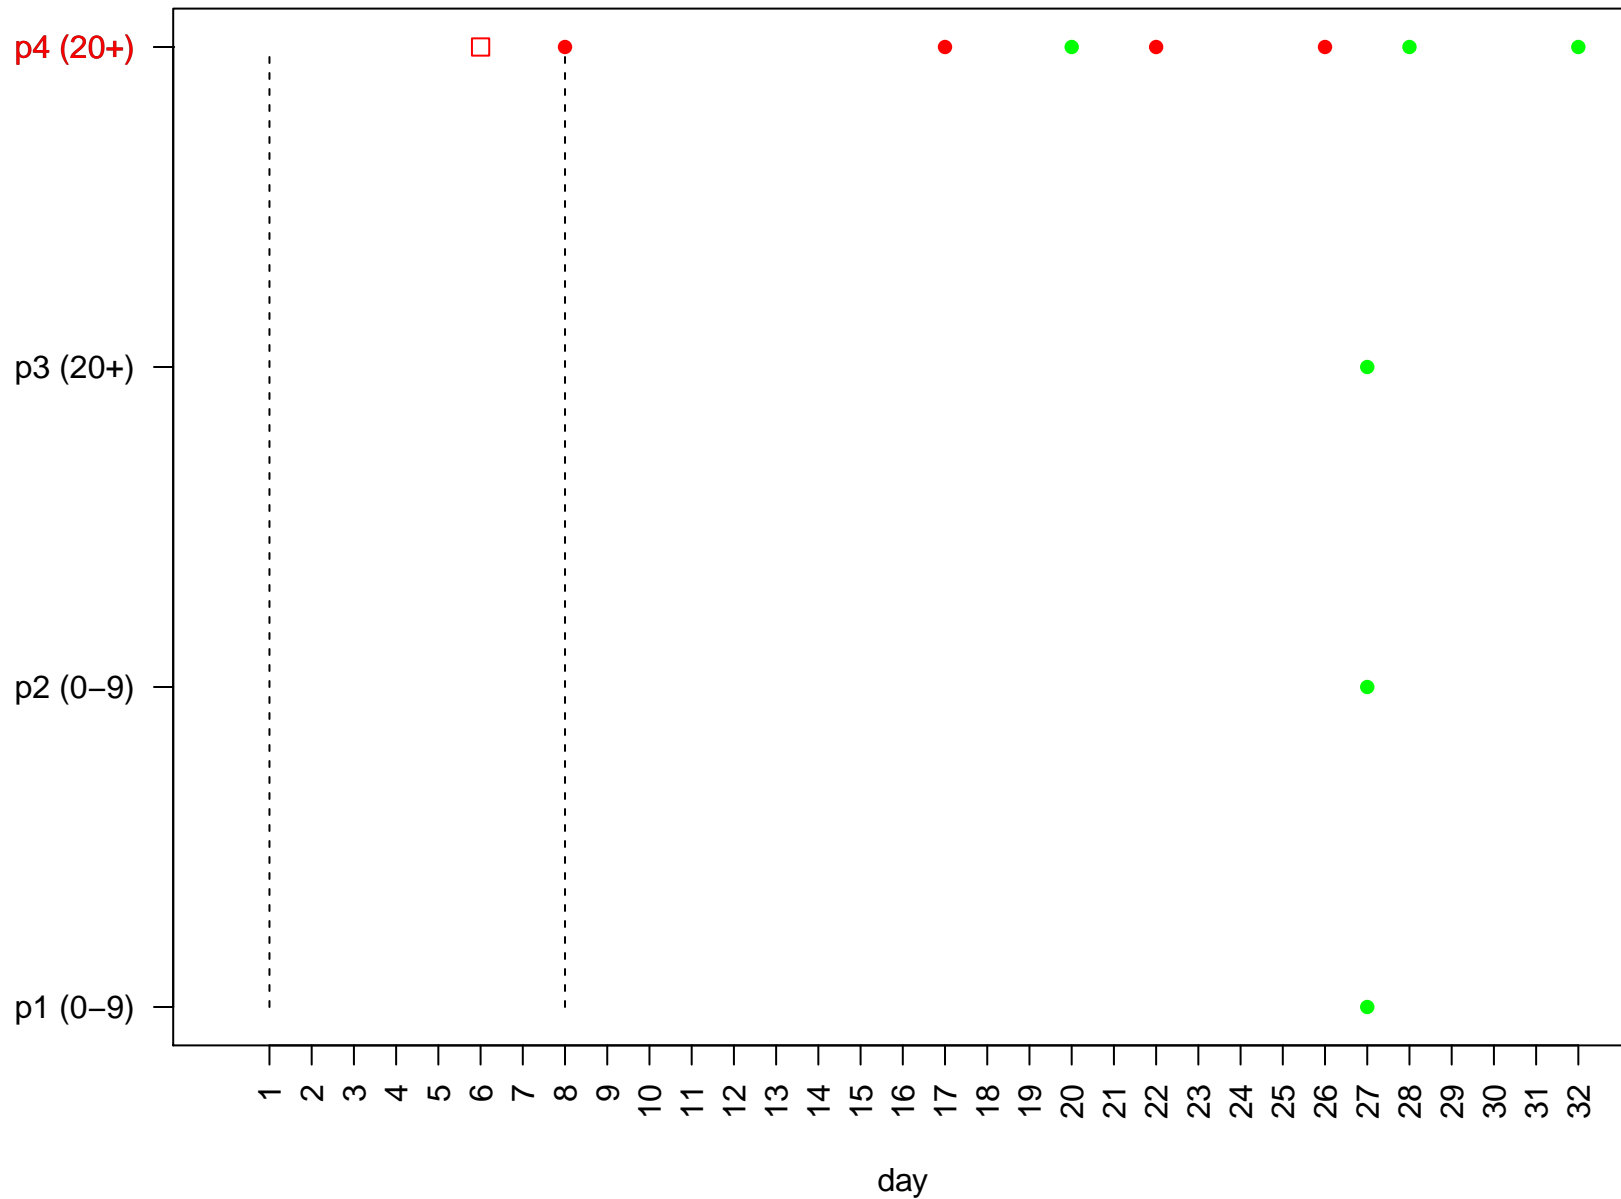

# Household 336

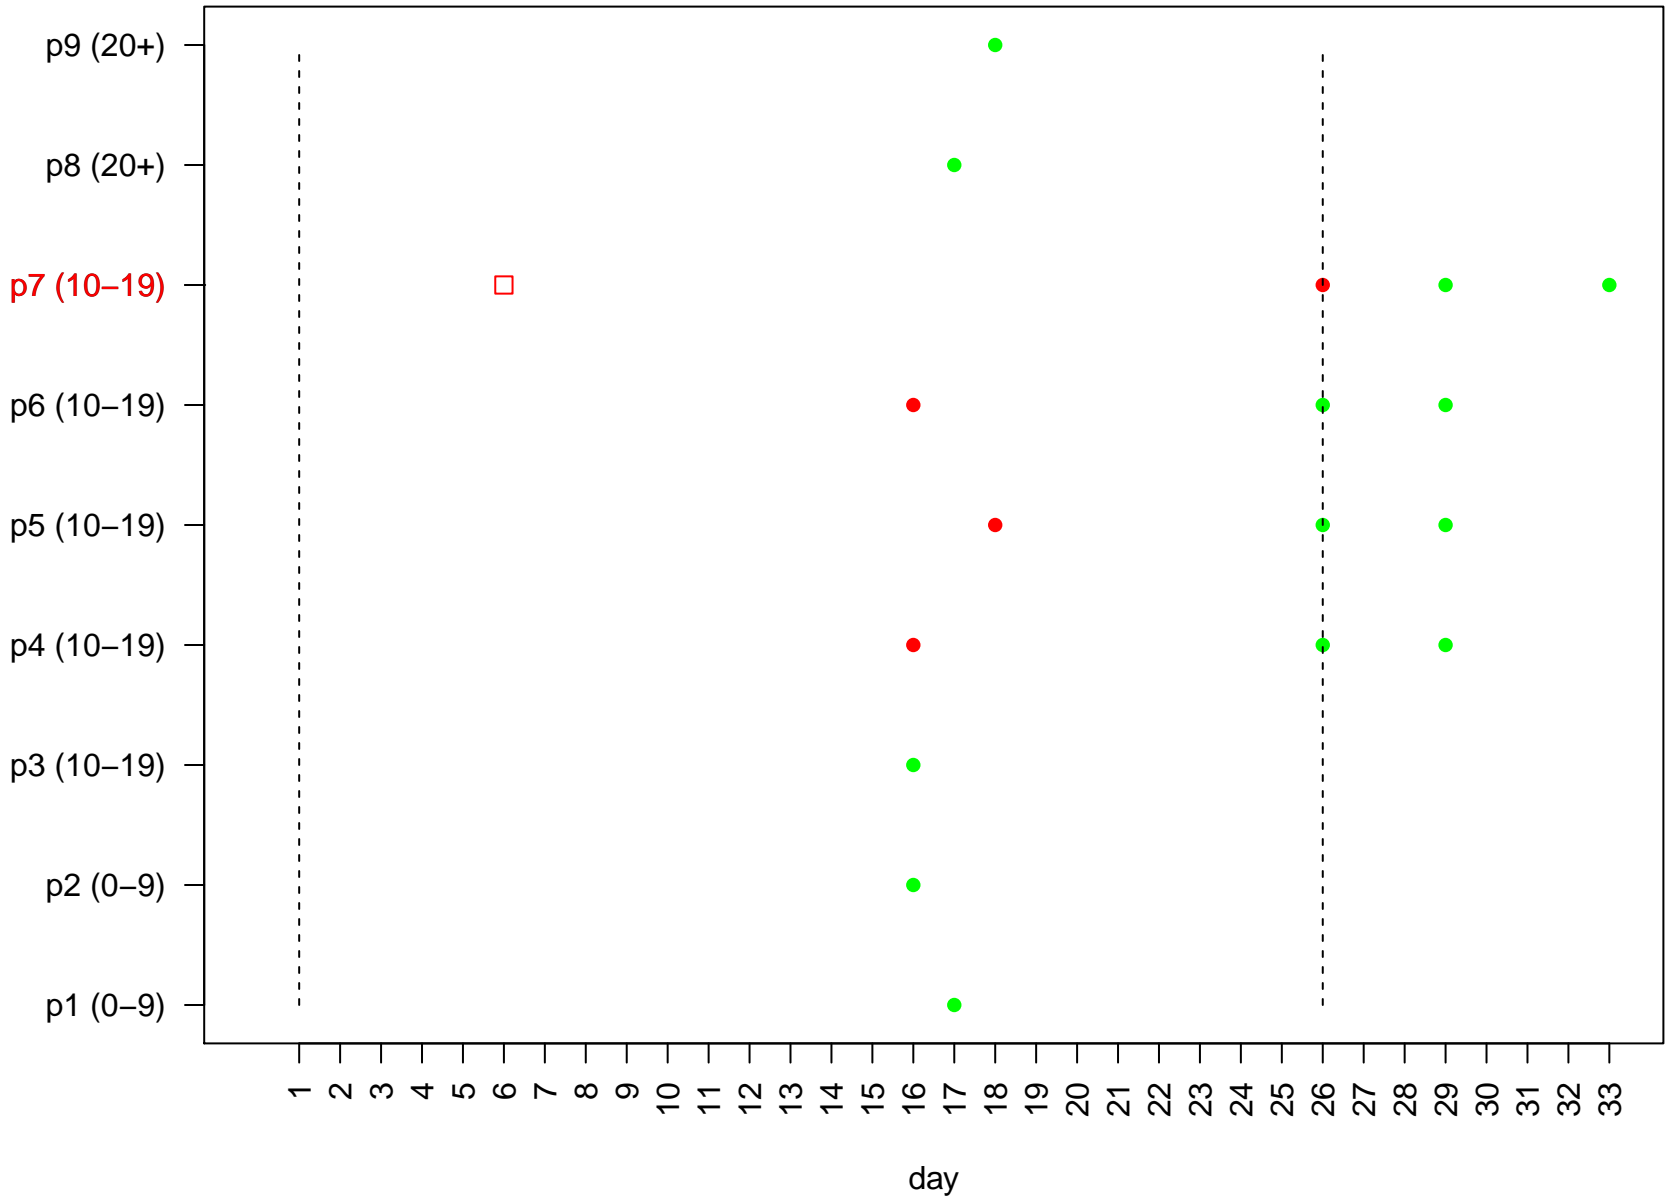



# Household 337

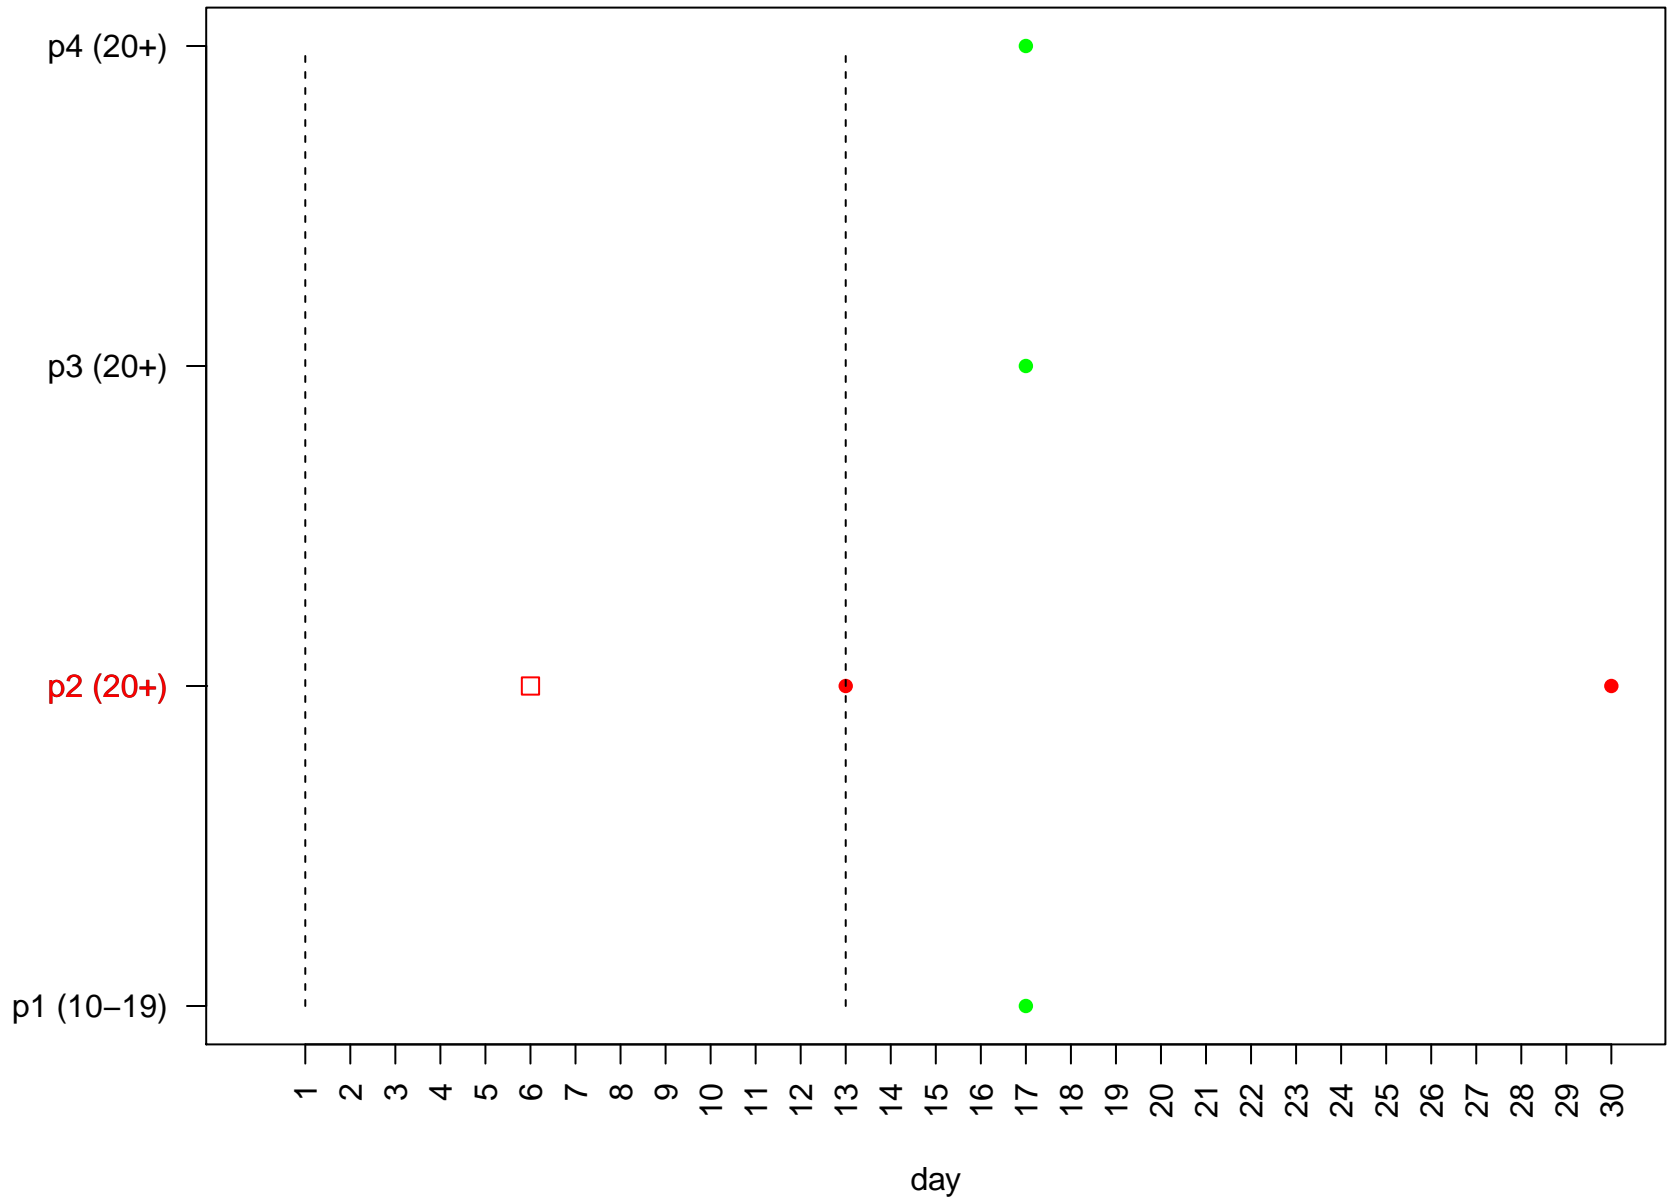

# Household 339

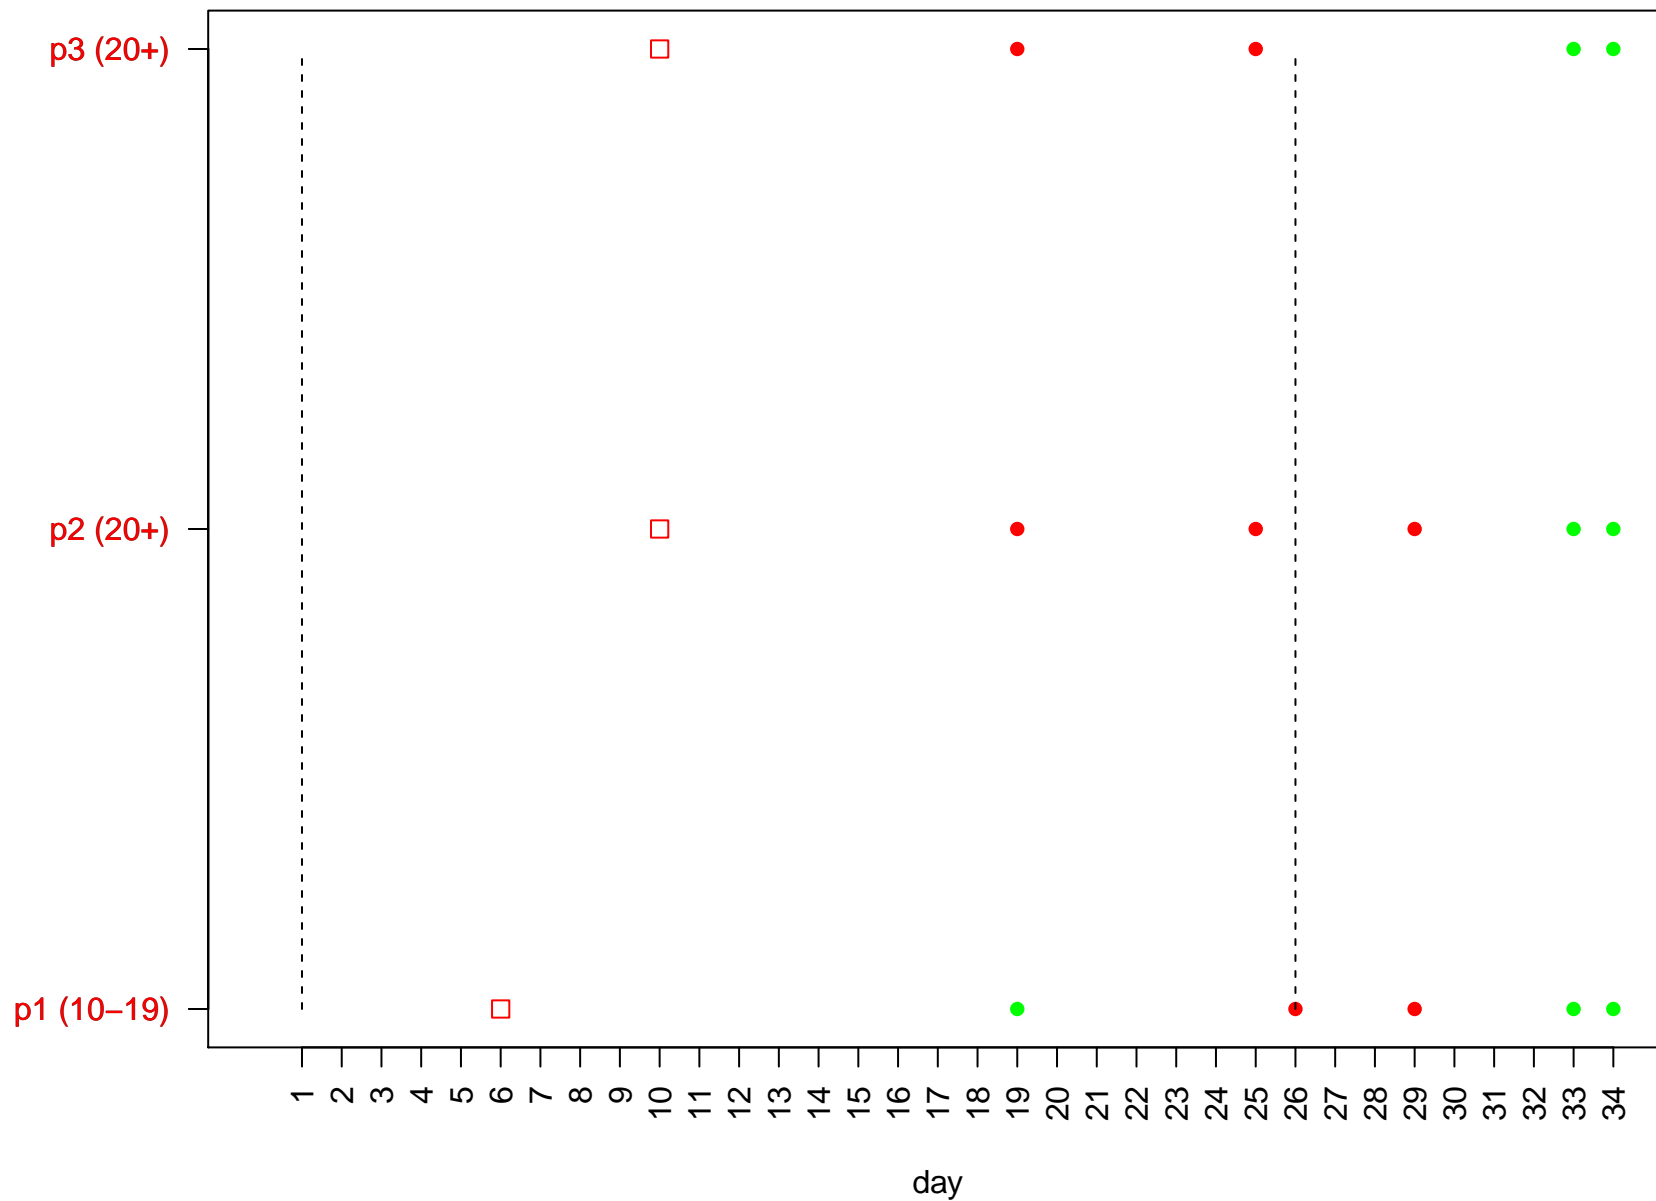

# Household 340

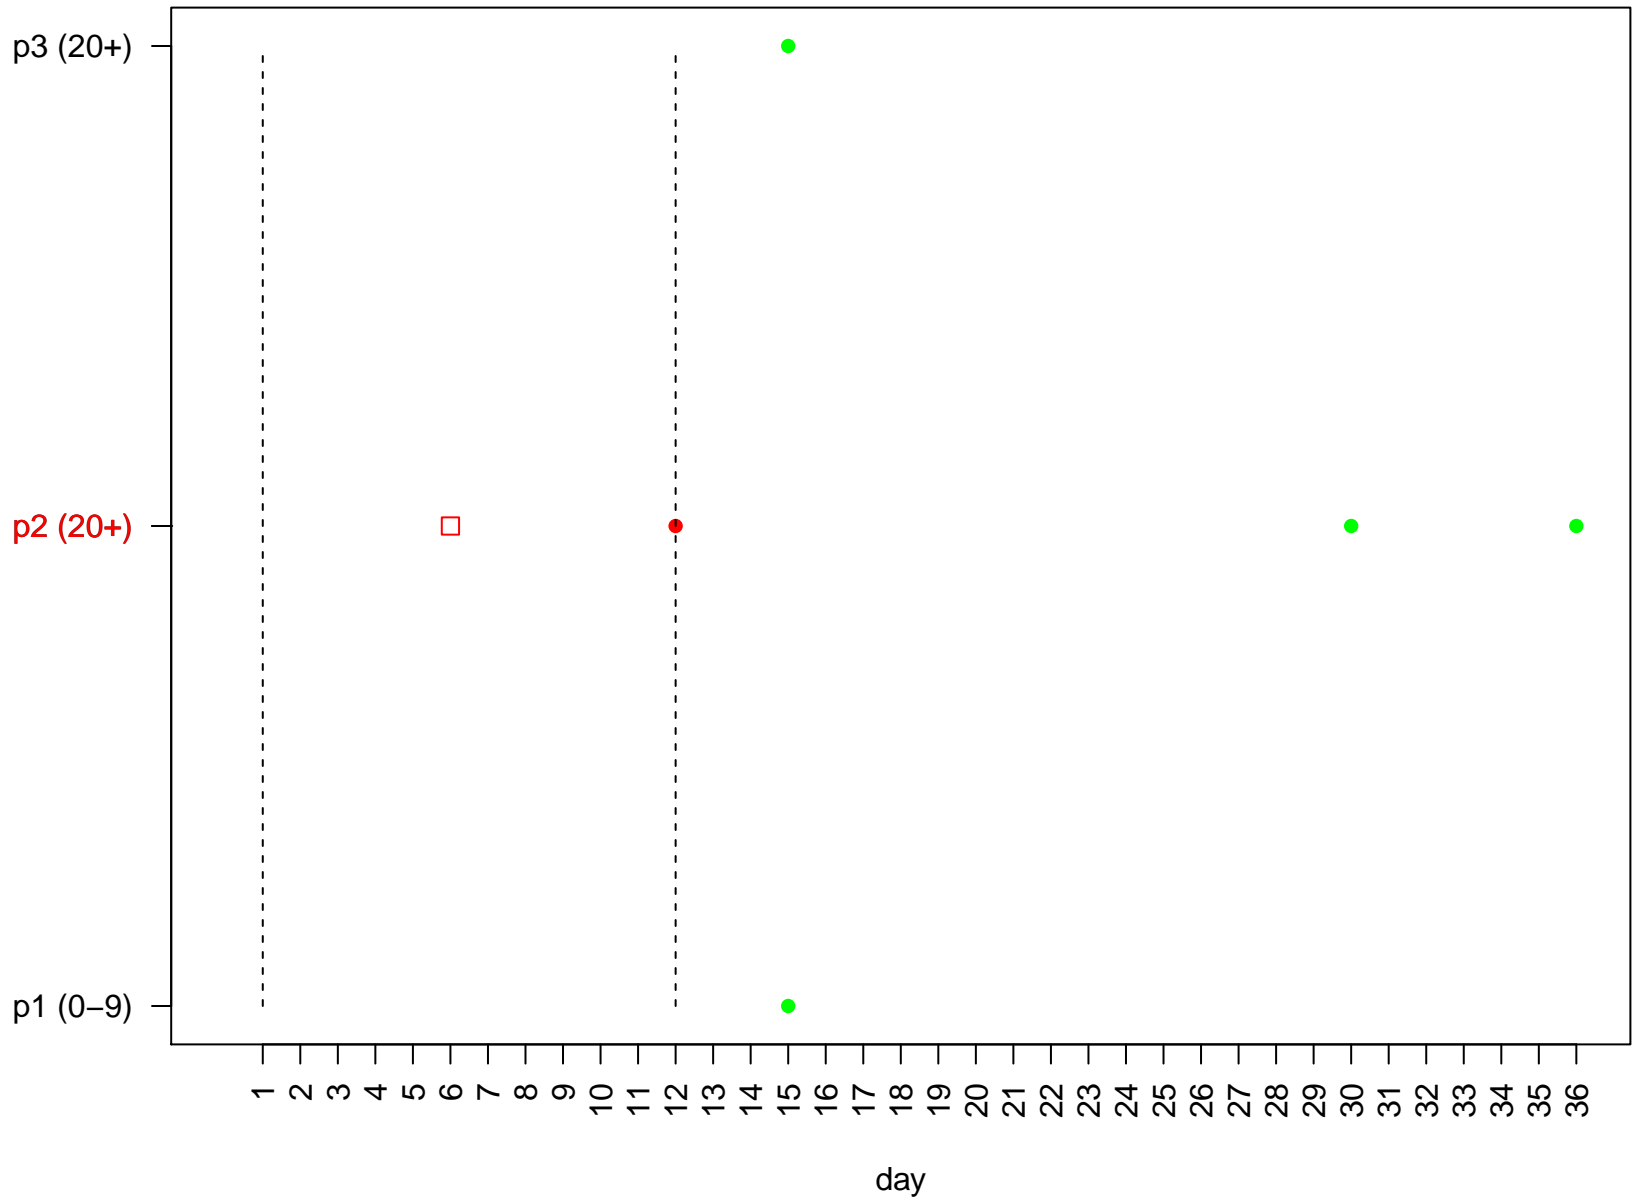

# Household 341

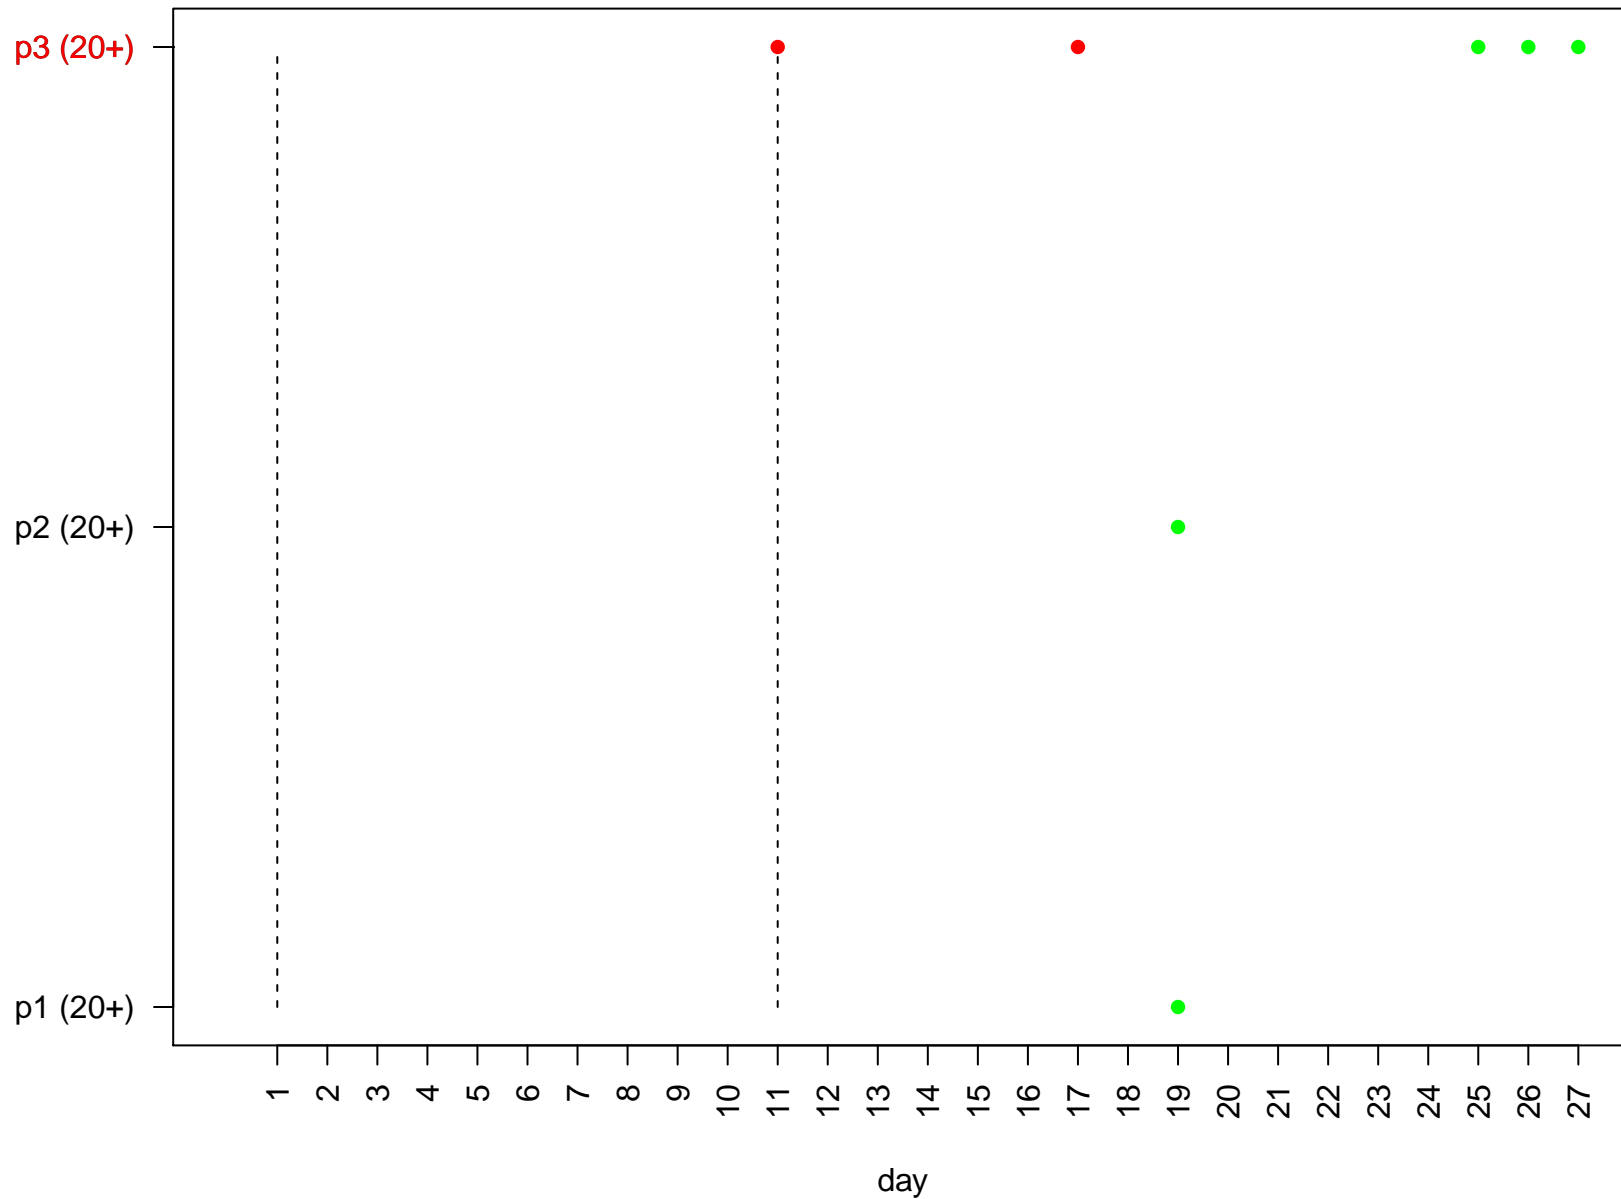

# Household 342

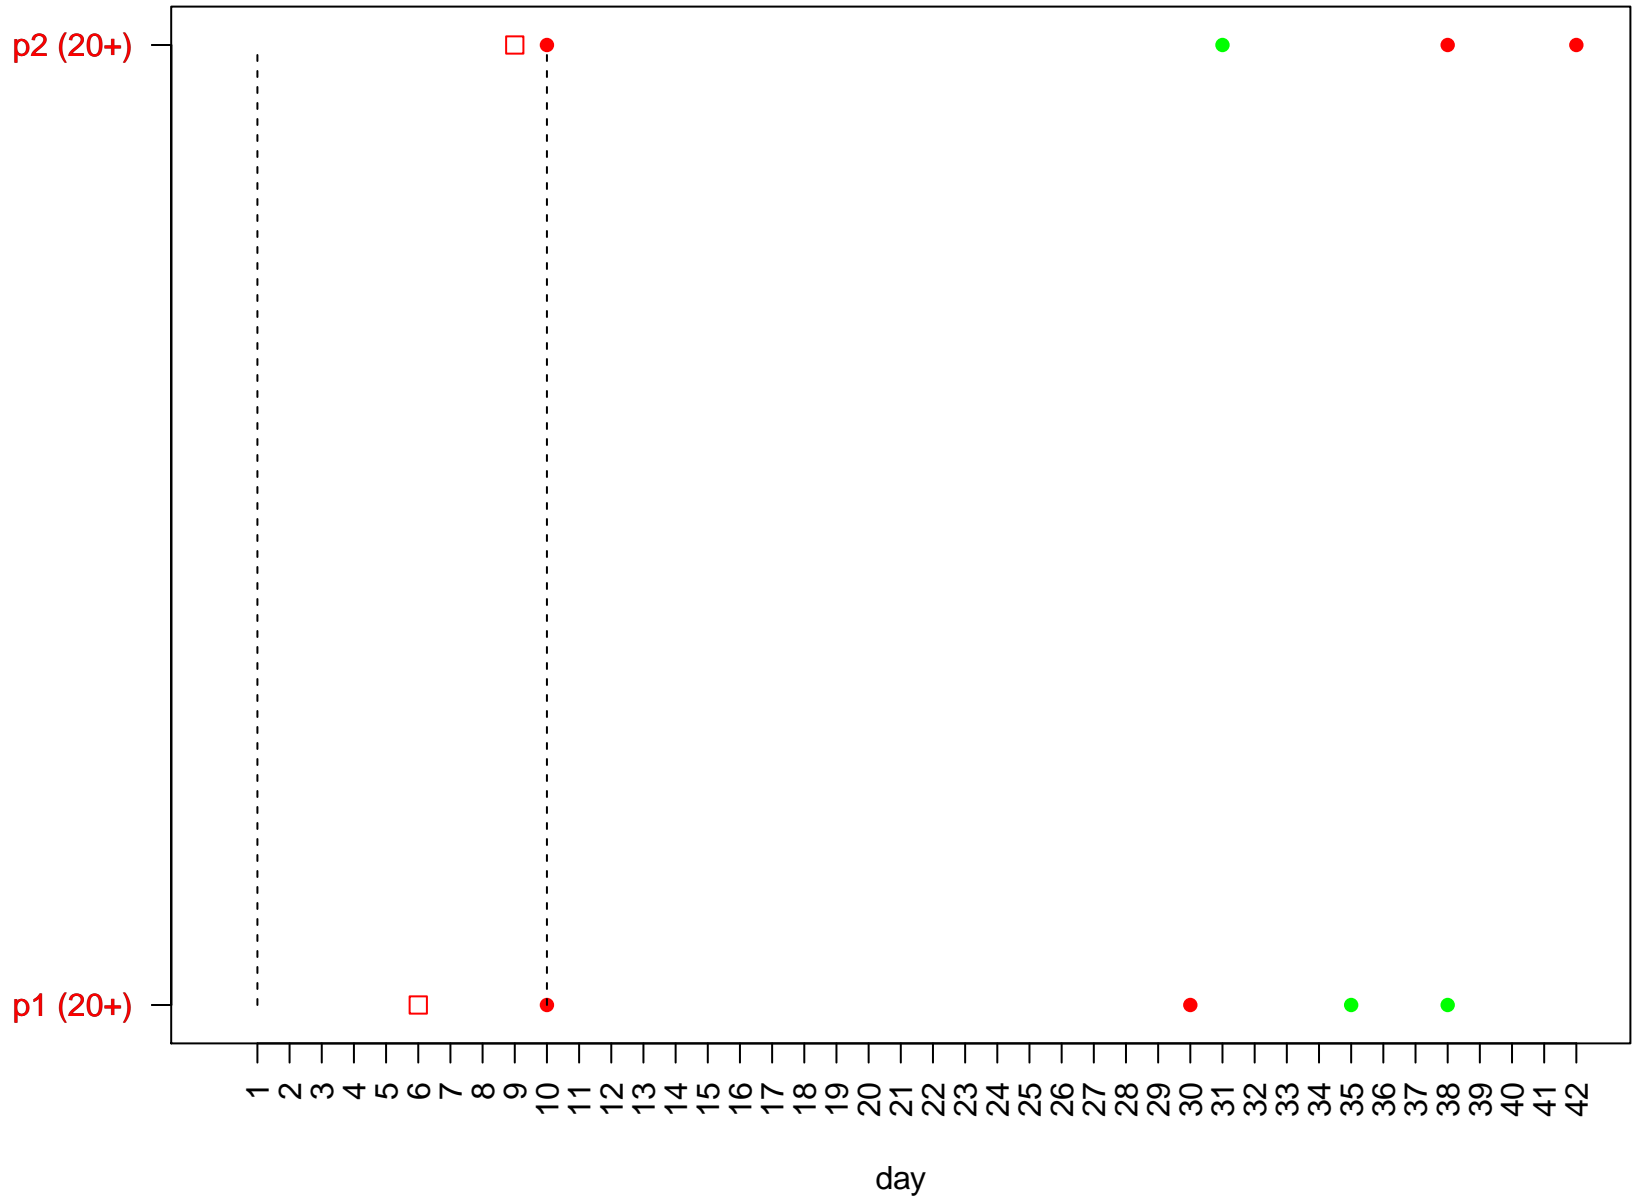



# Household 344

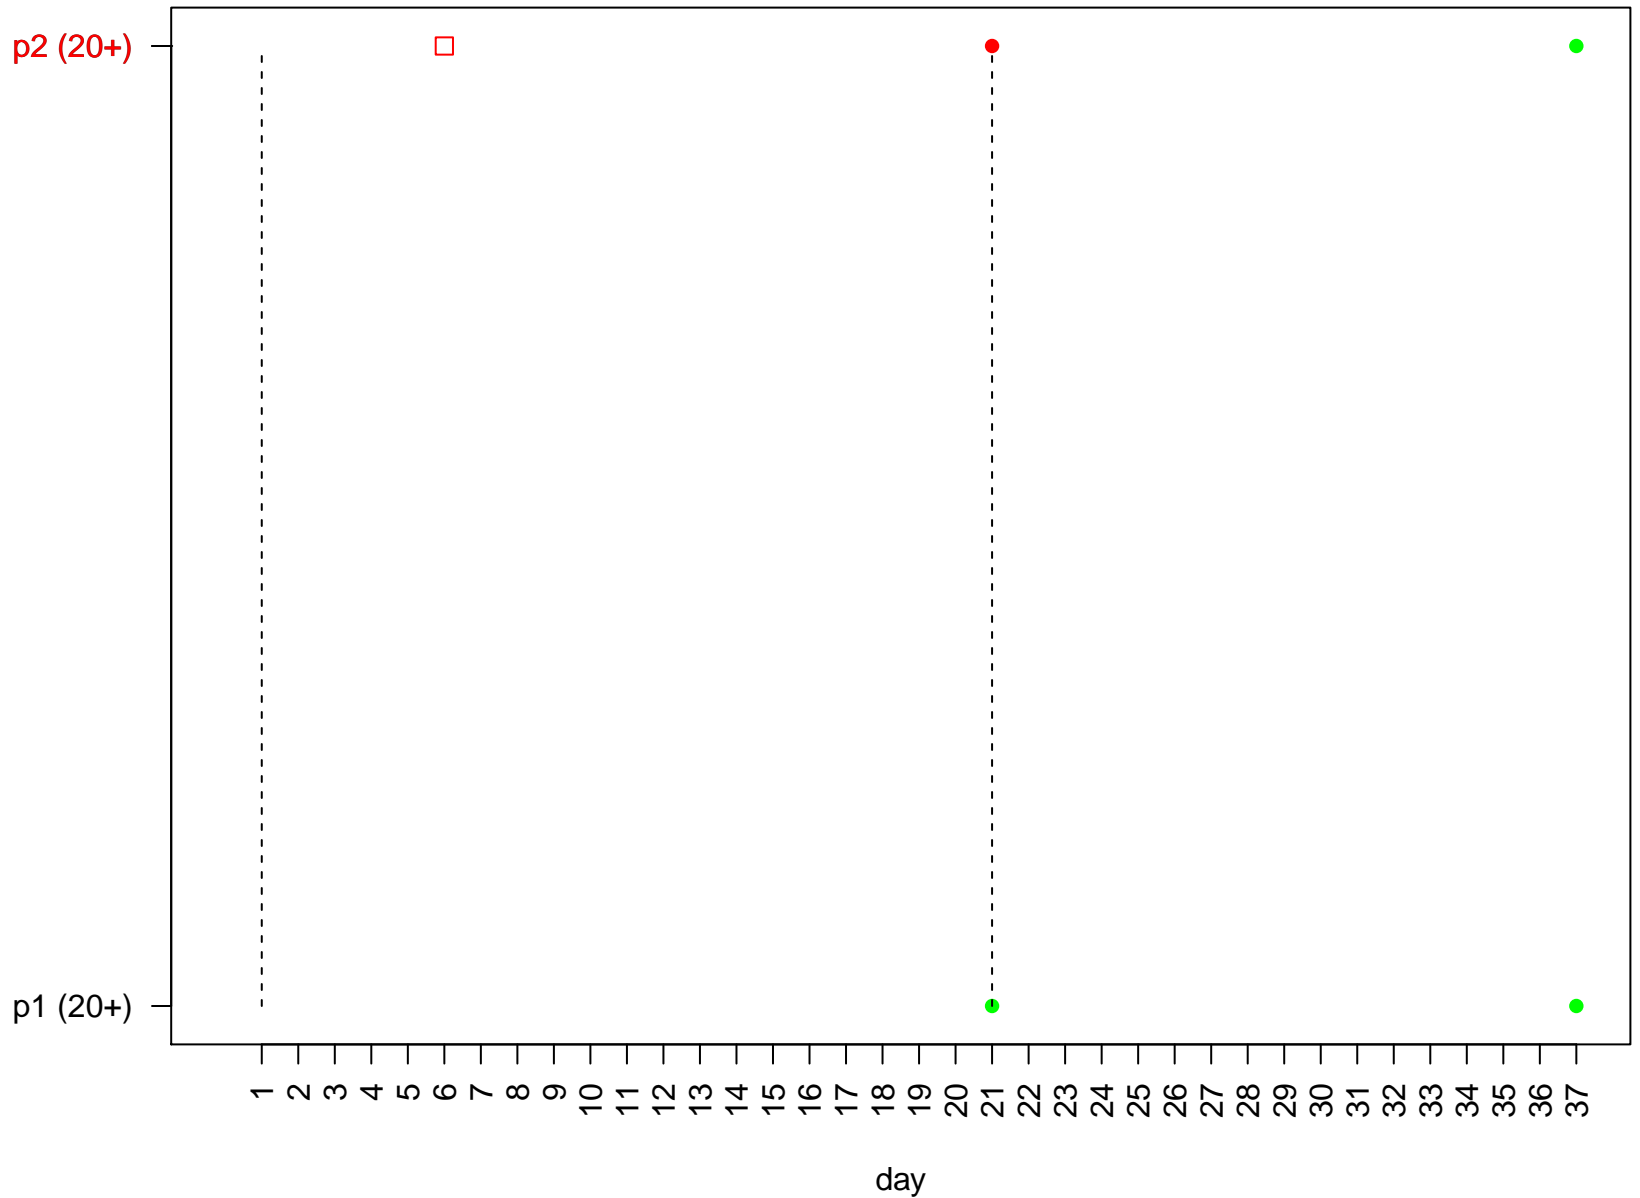

# Household 345

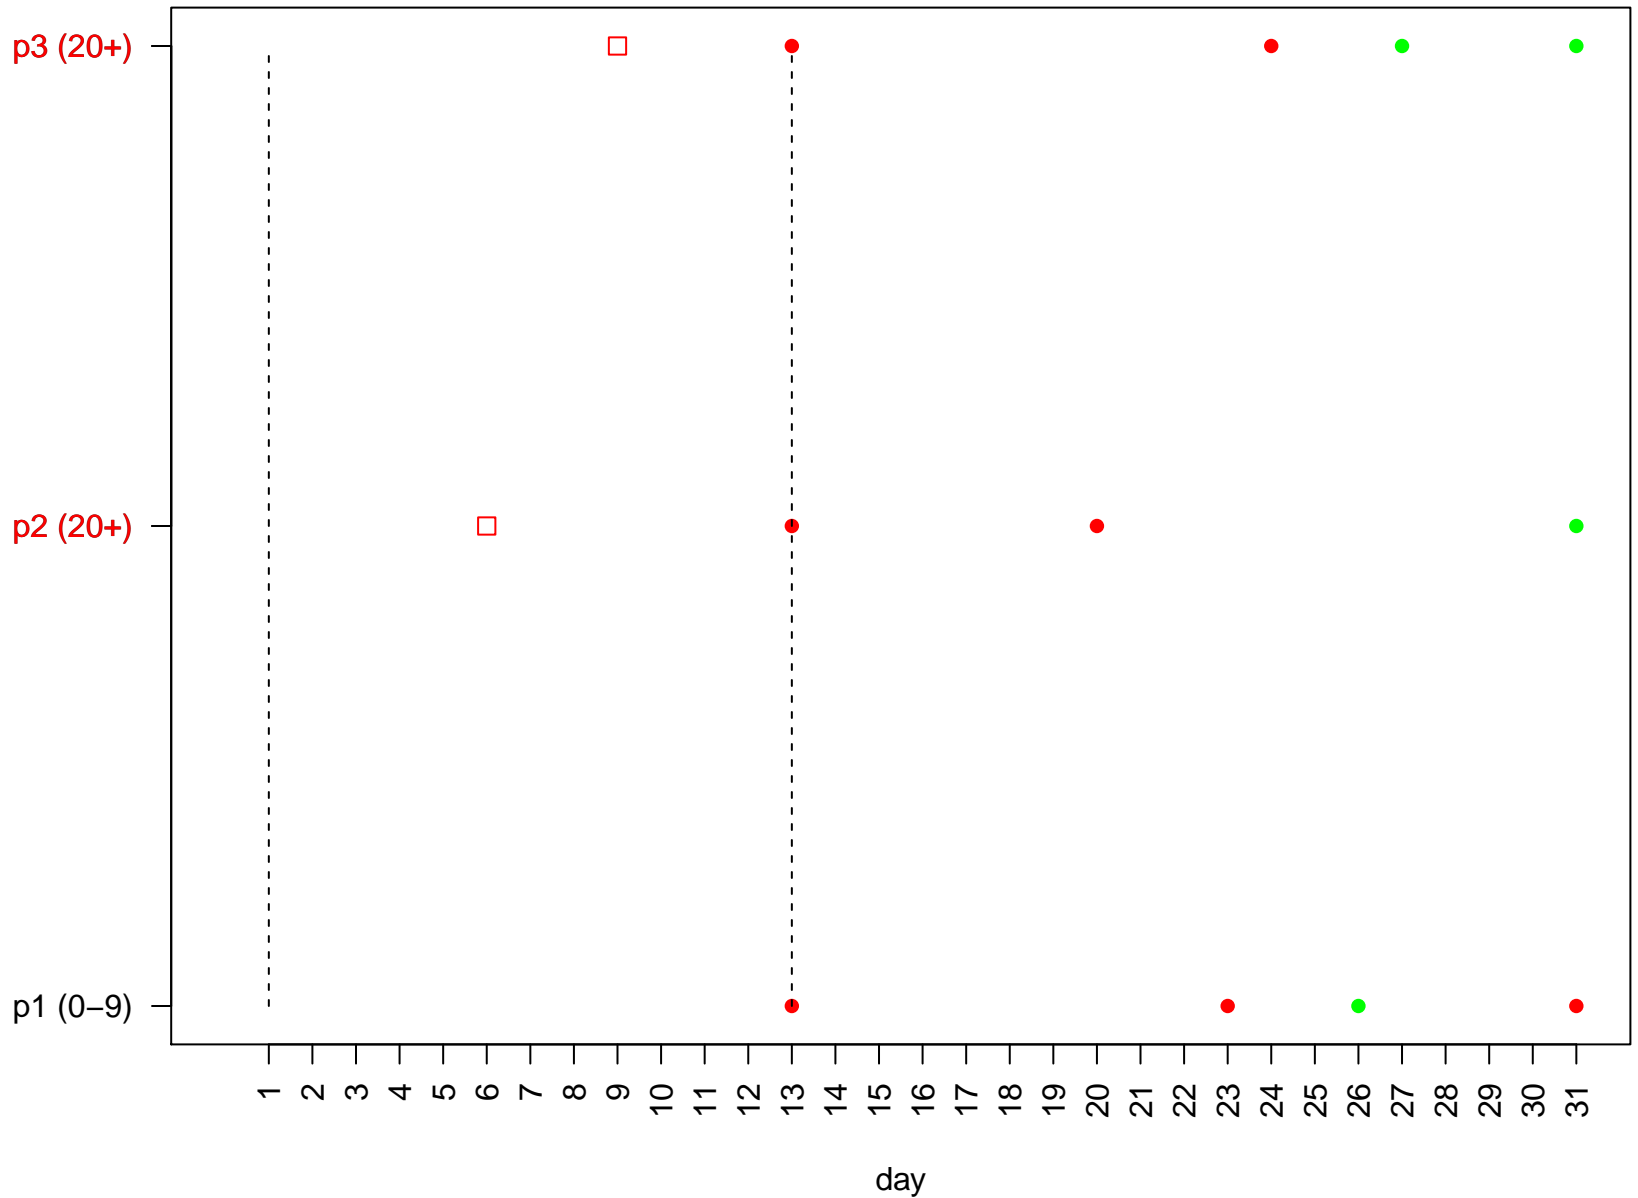



# Household 346

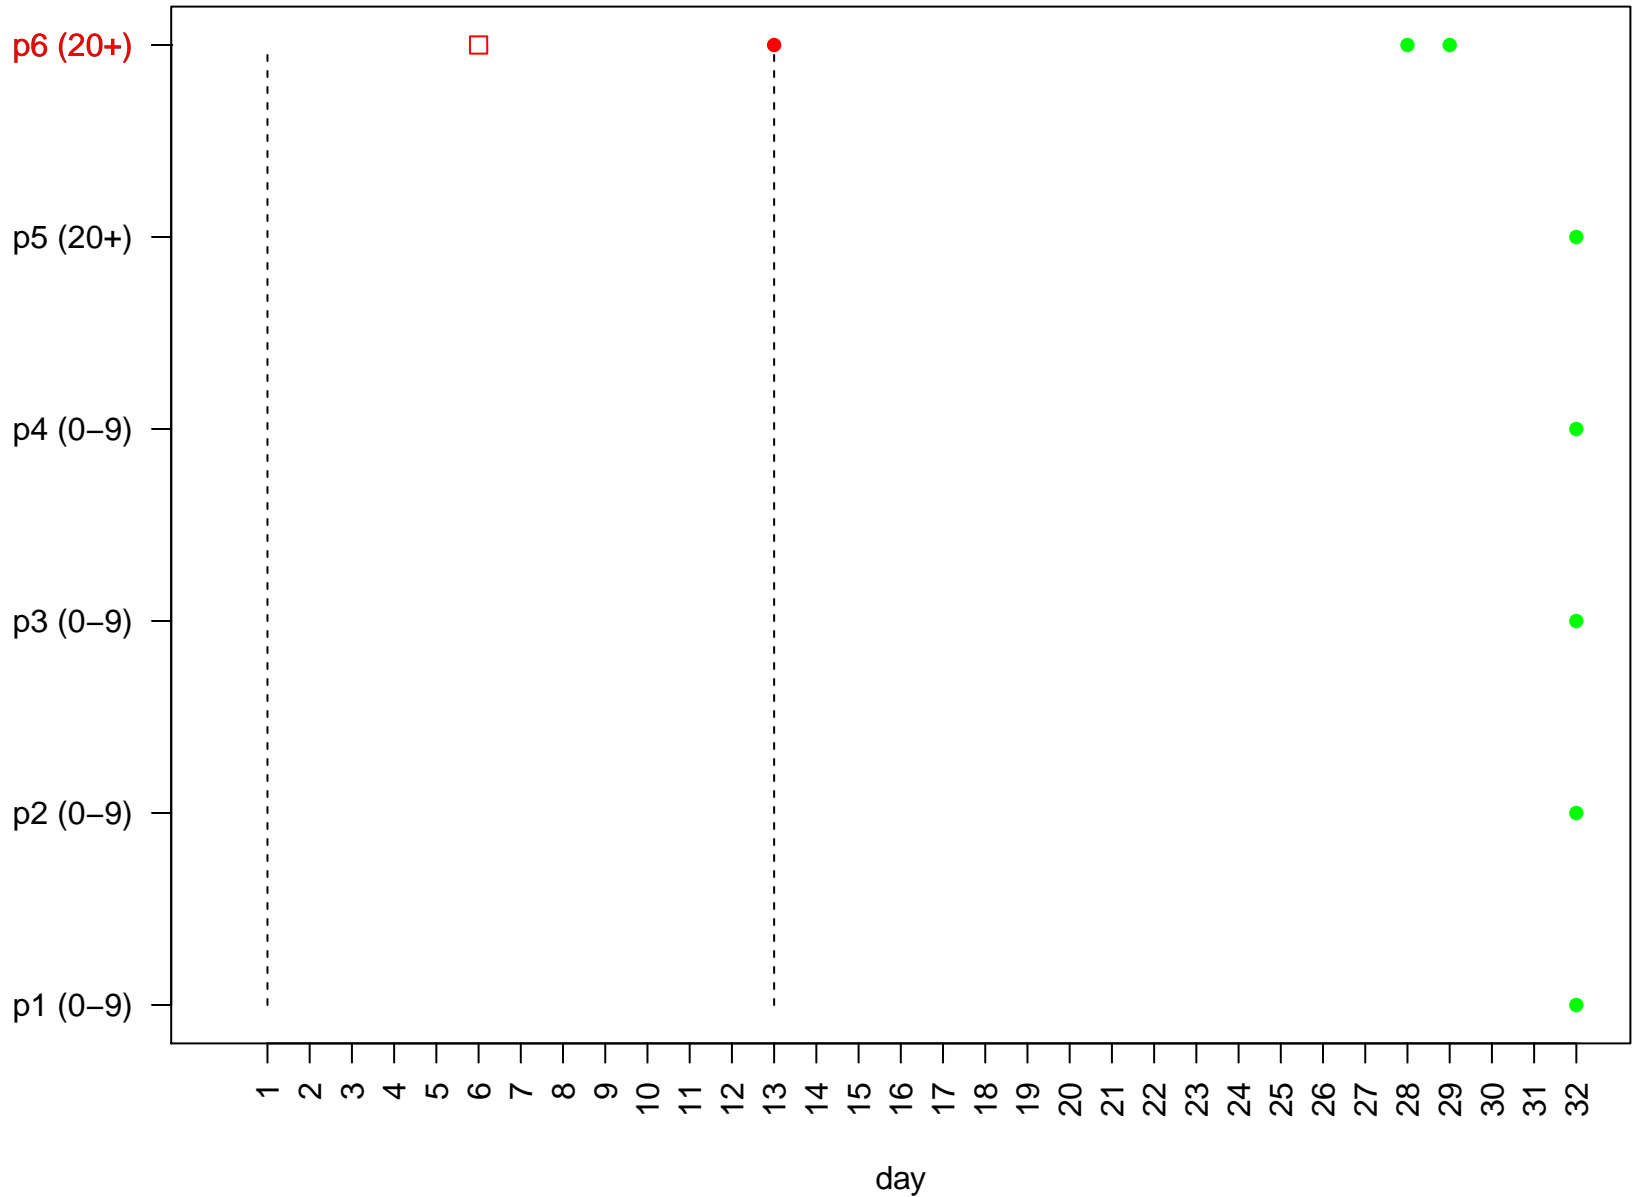

# Household 347

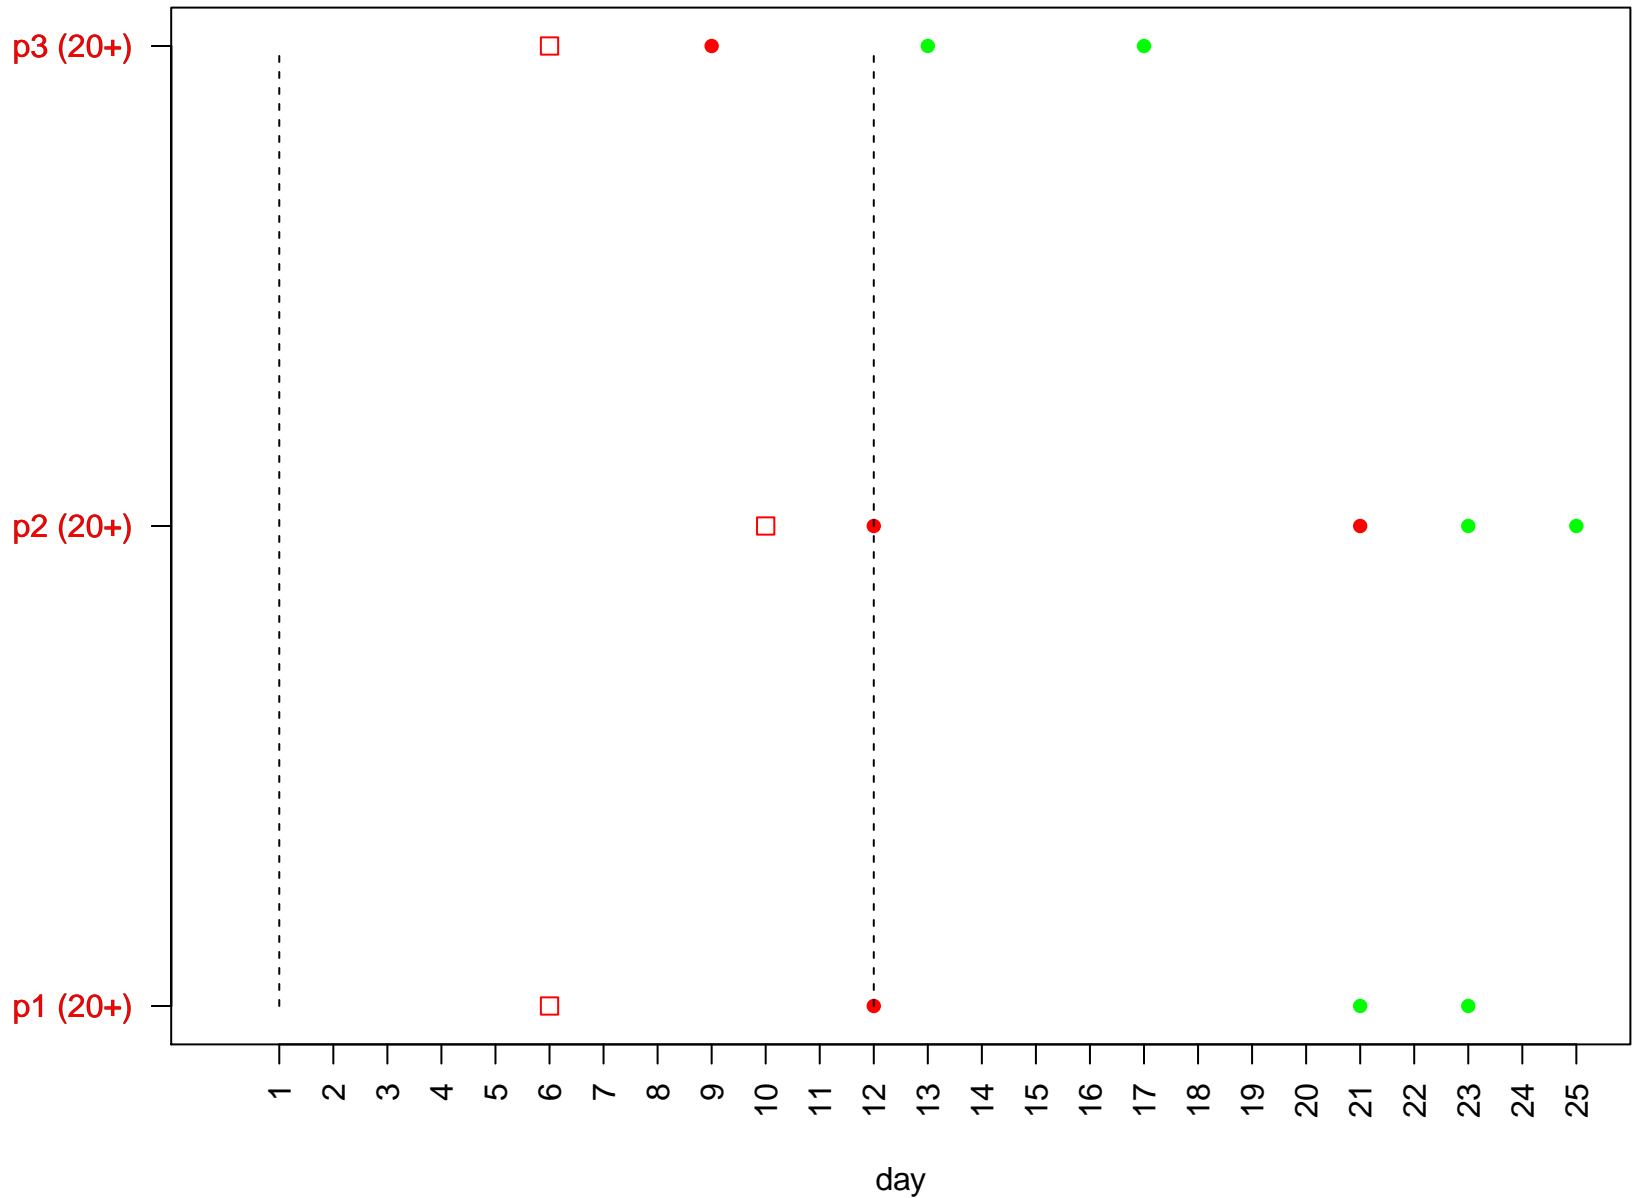

# Household 348

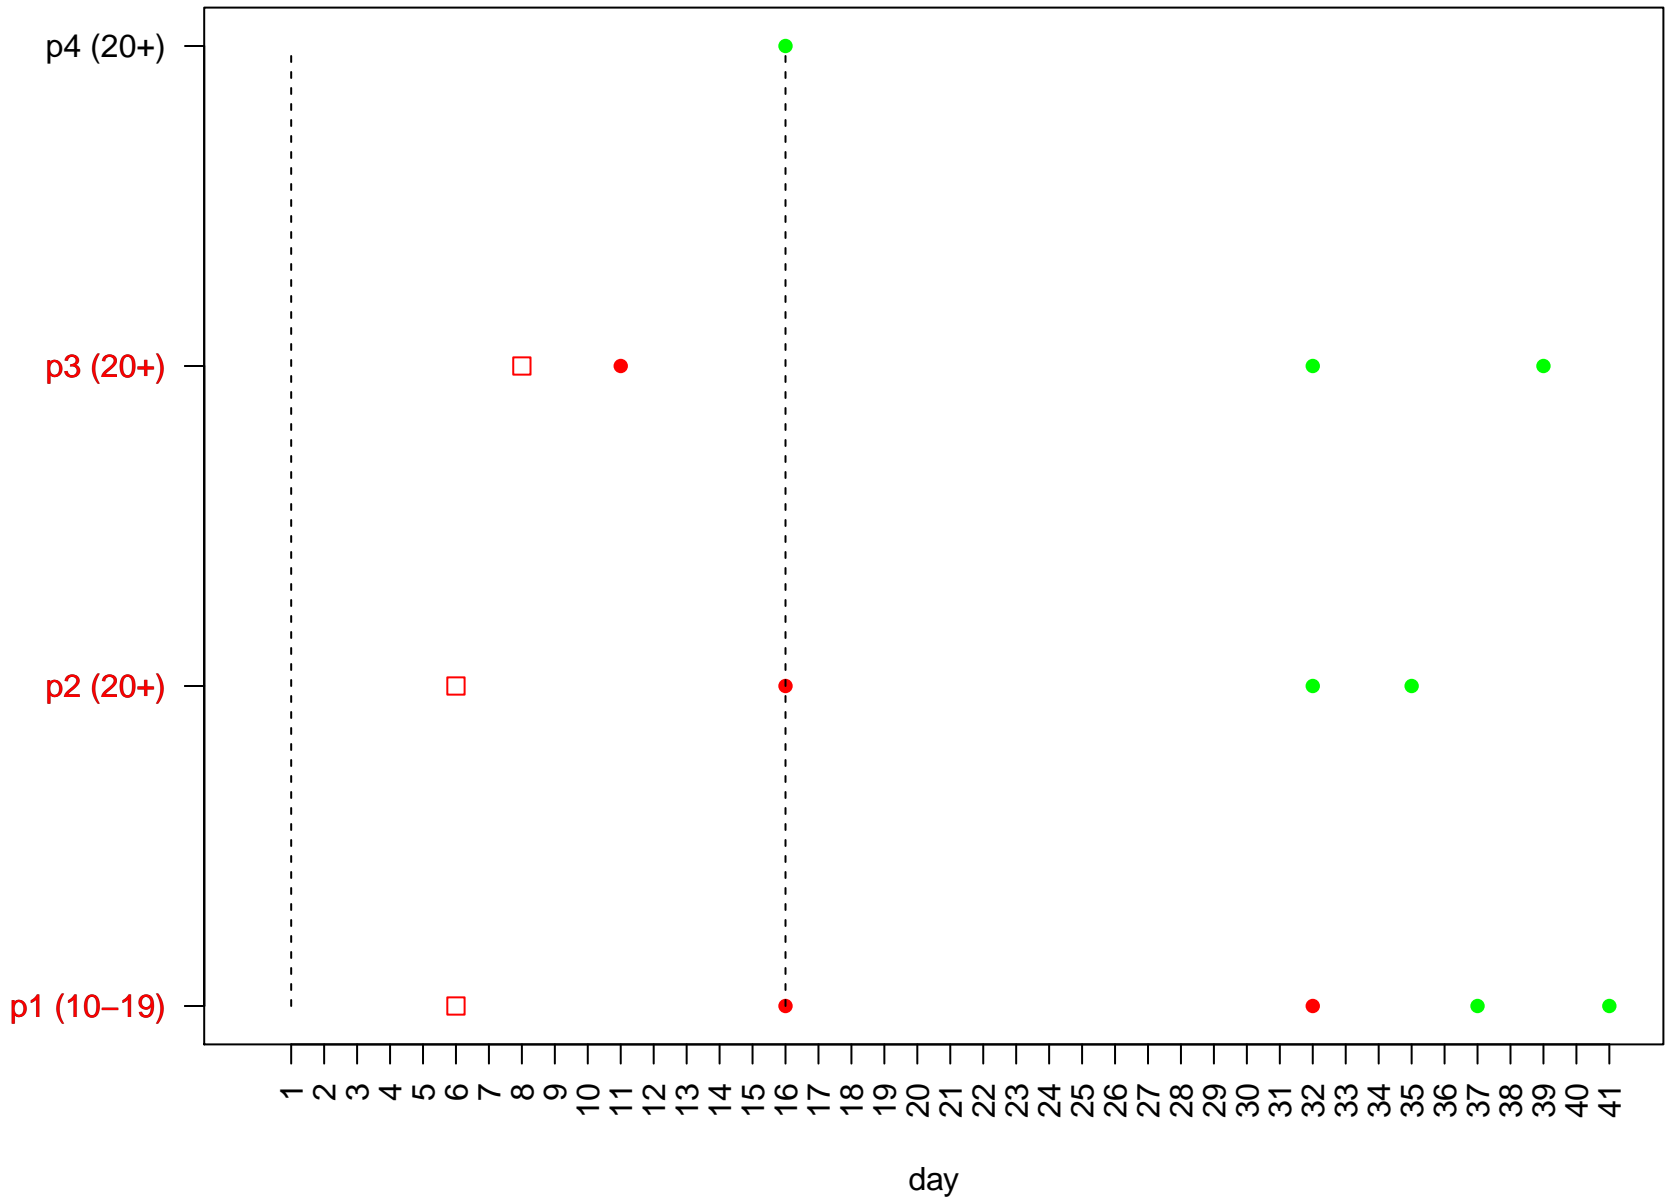

# Household 349

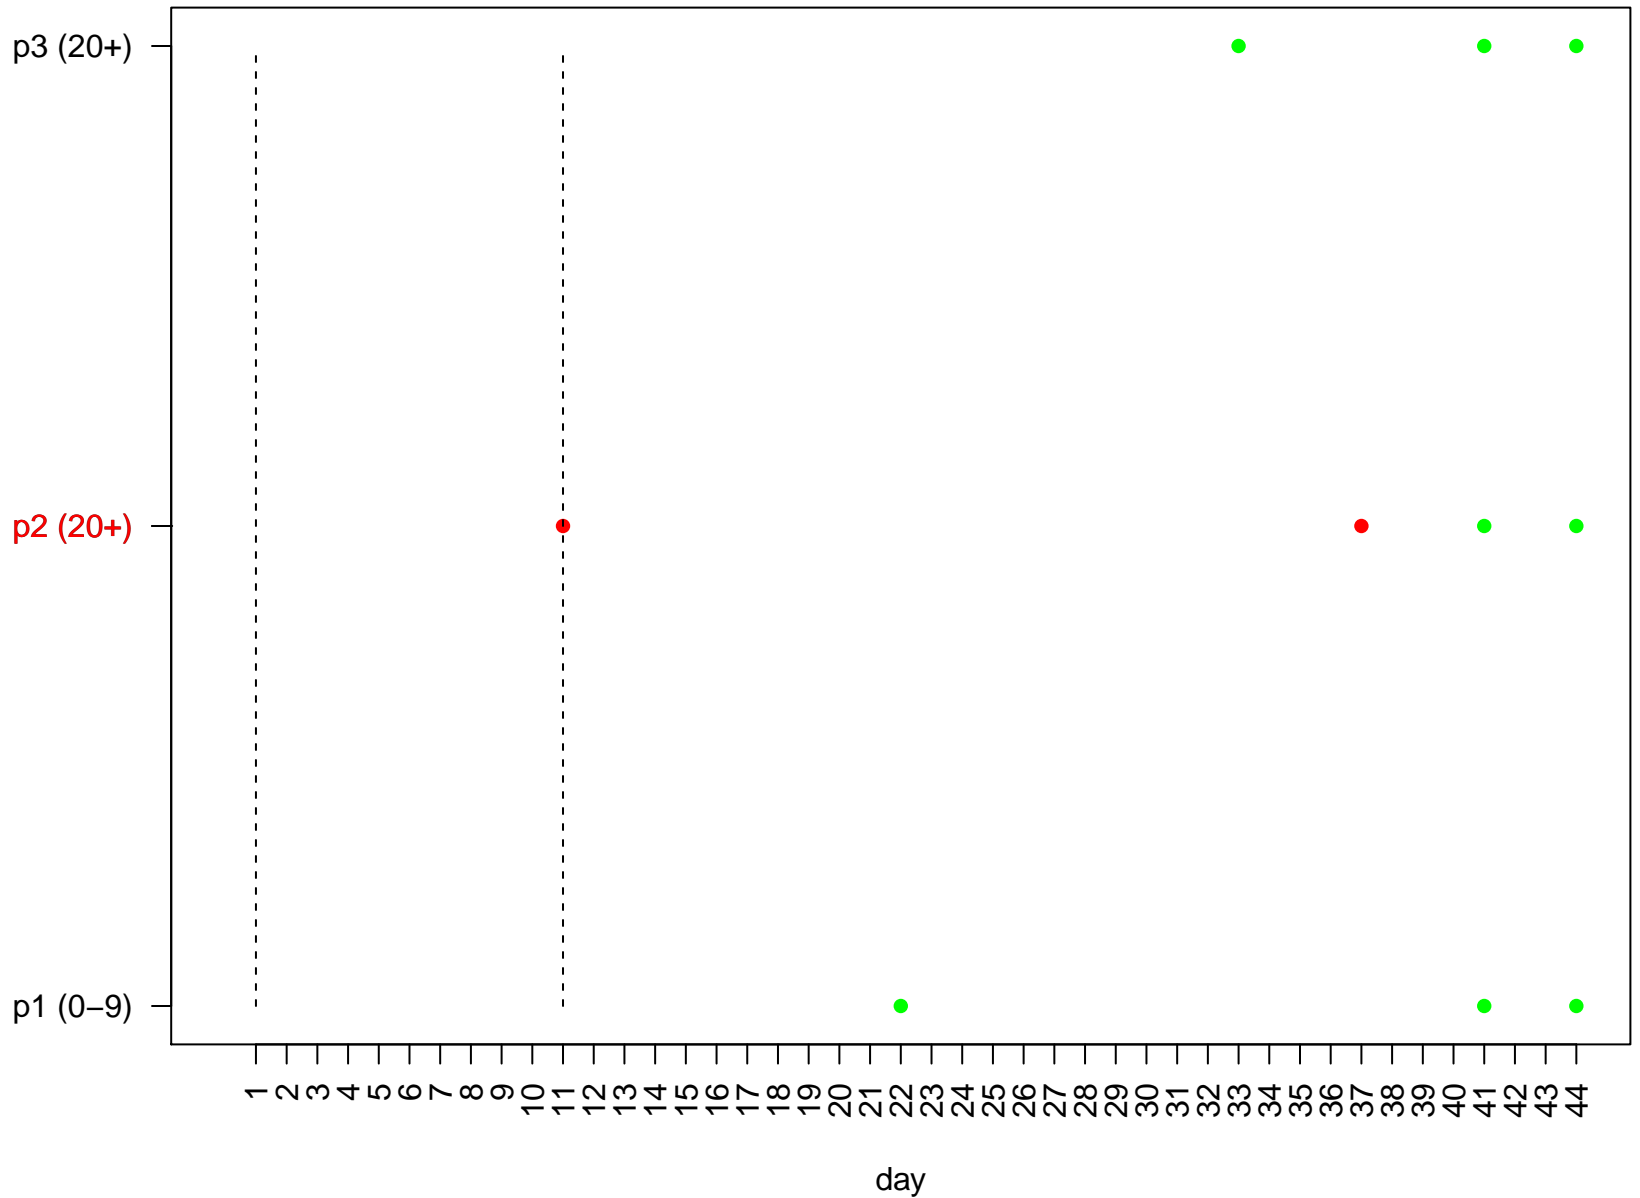

# Household 350

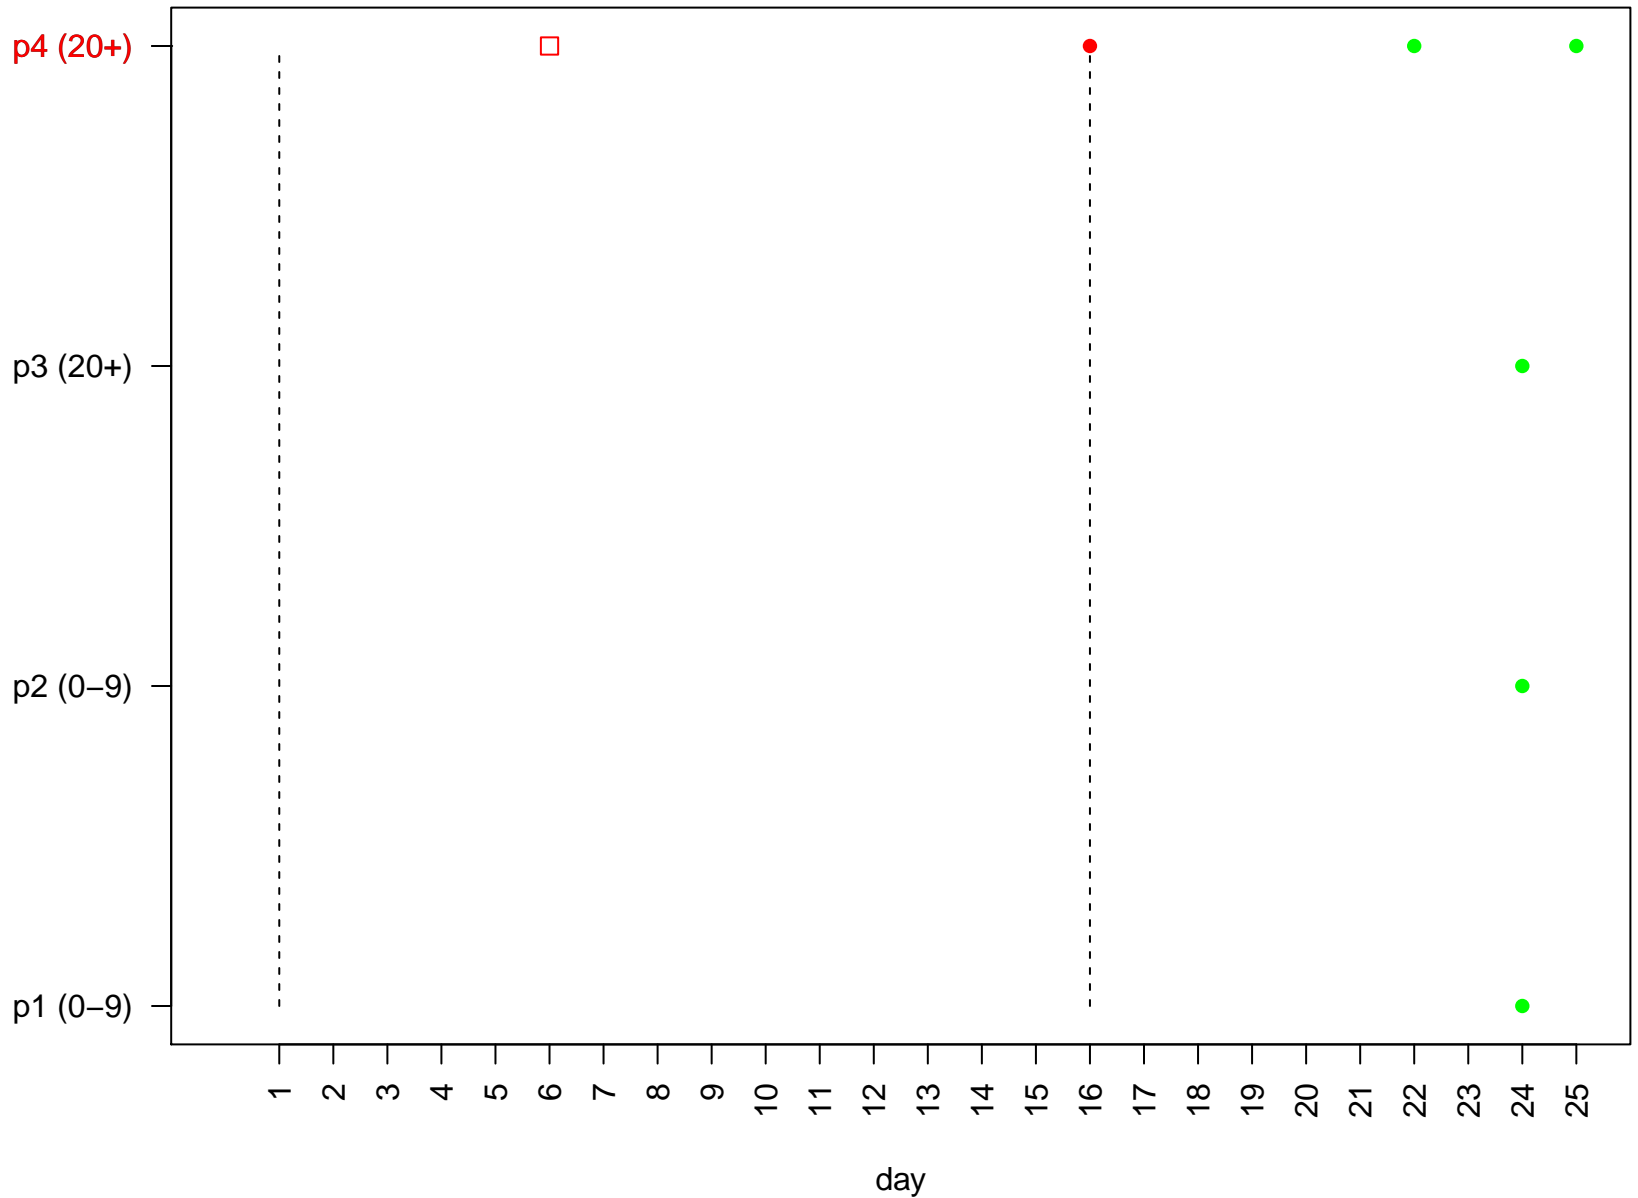

# Household 351

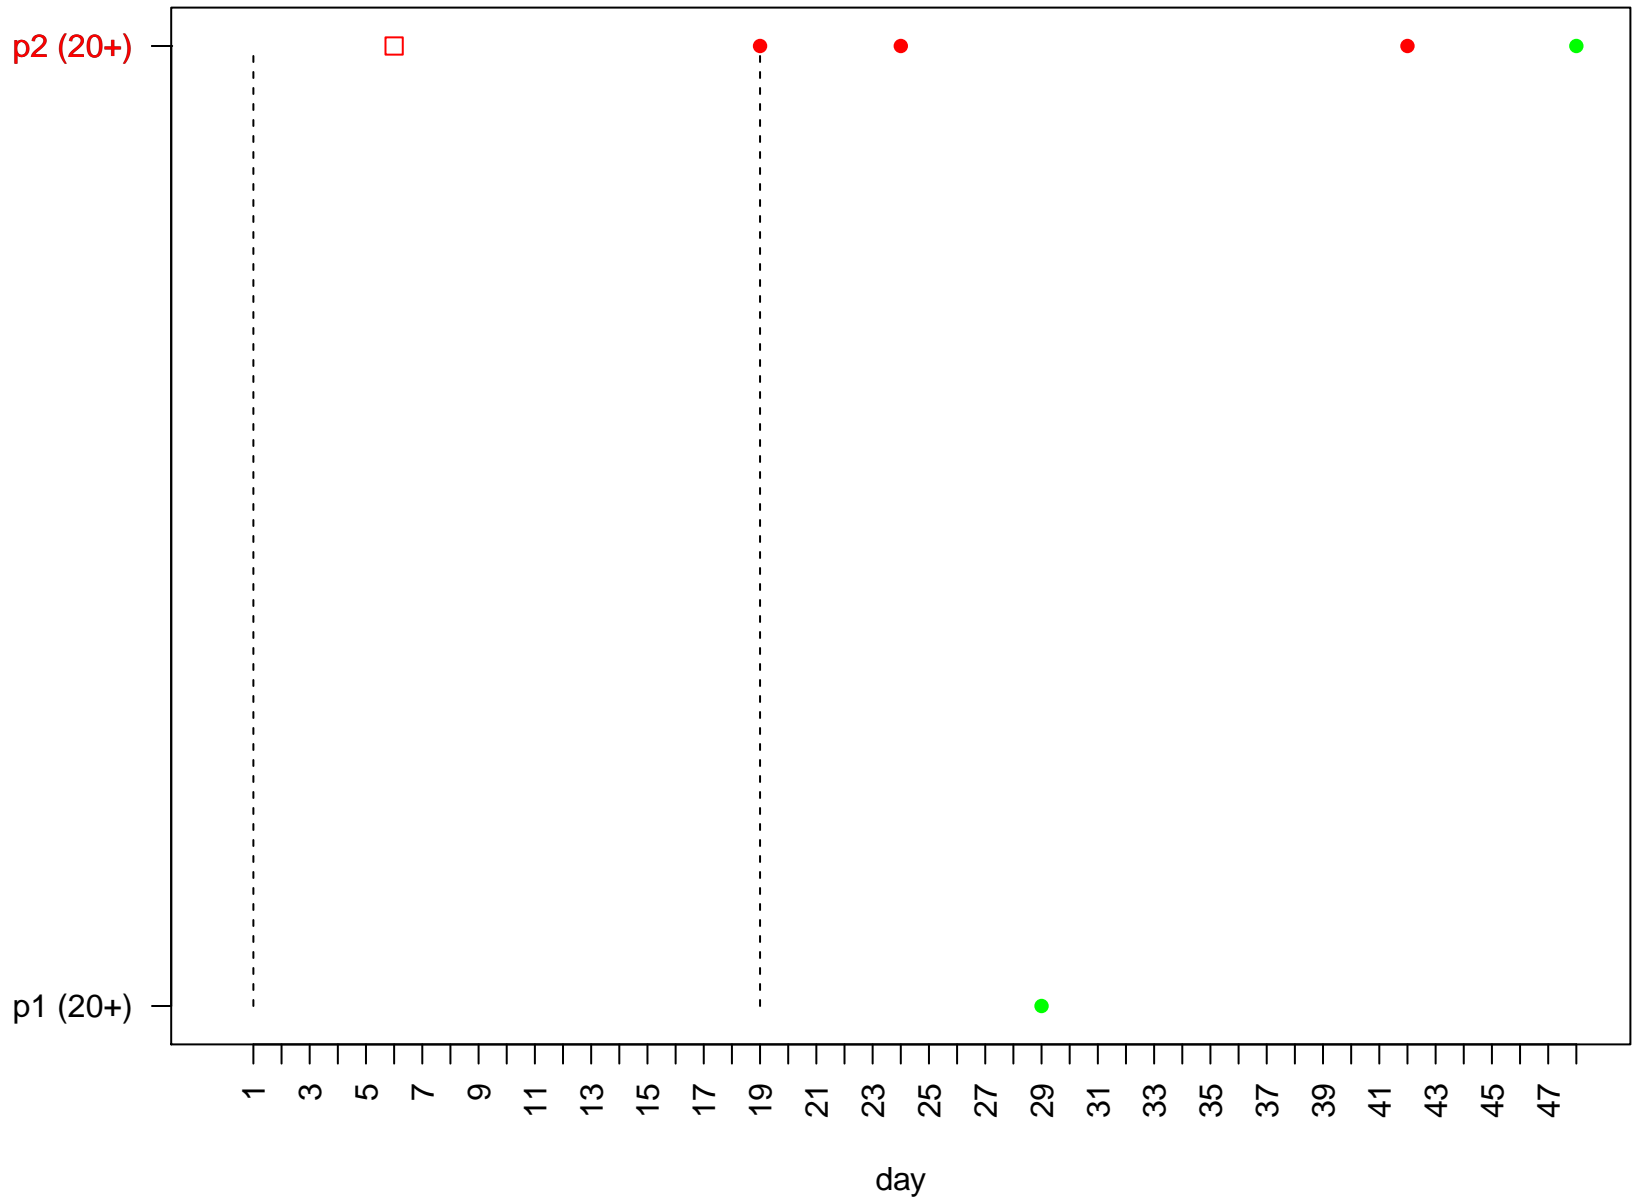

# Household 352

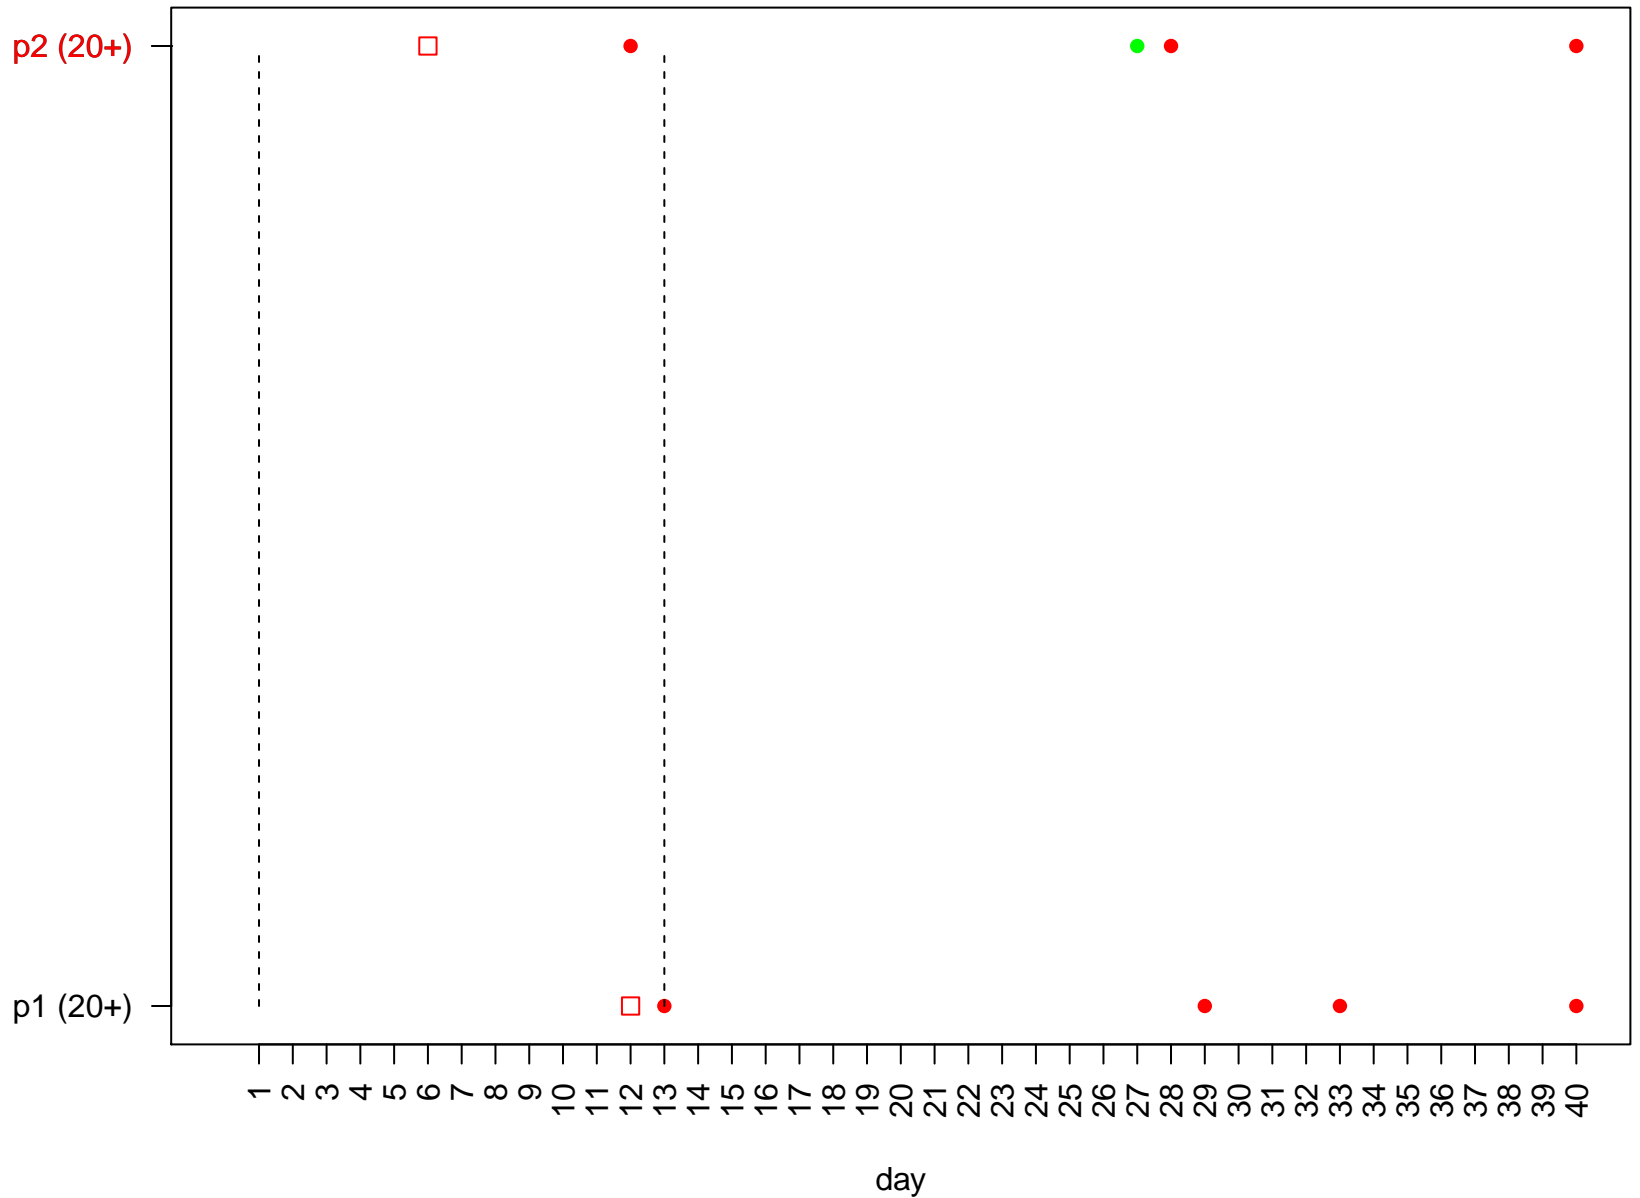

# Household 353

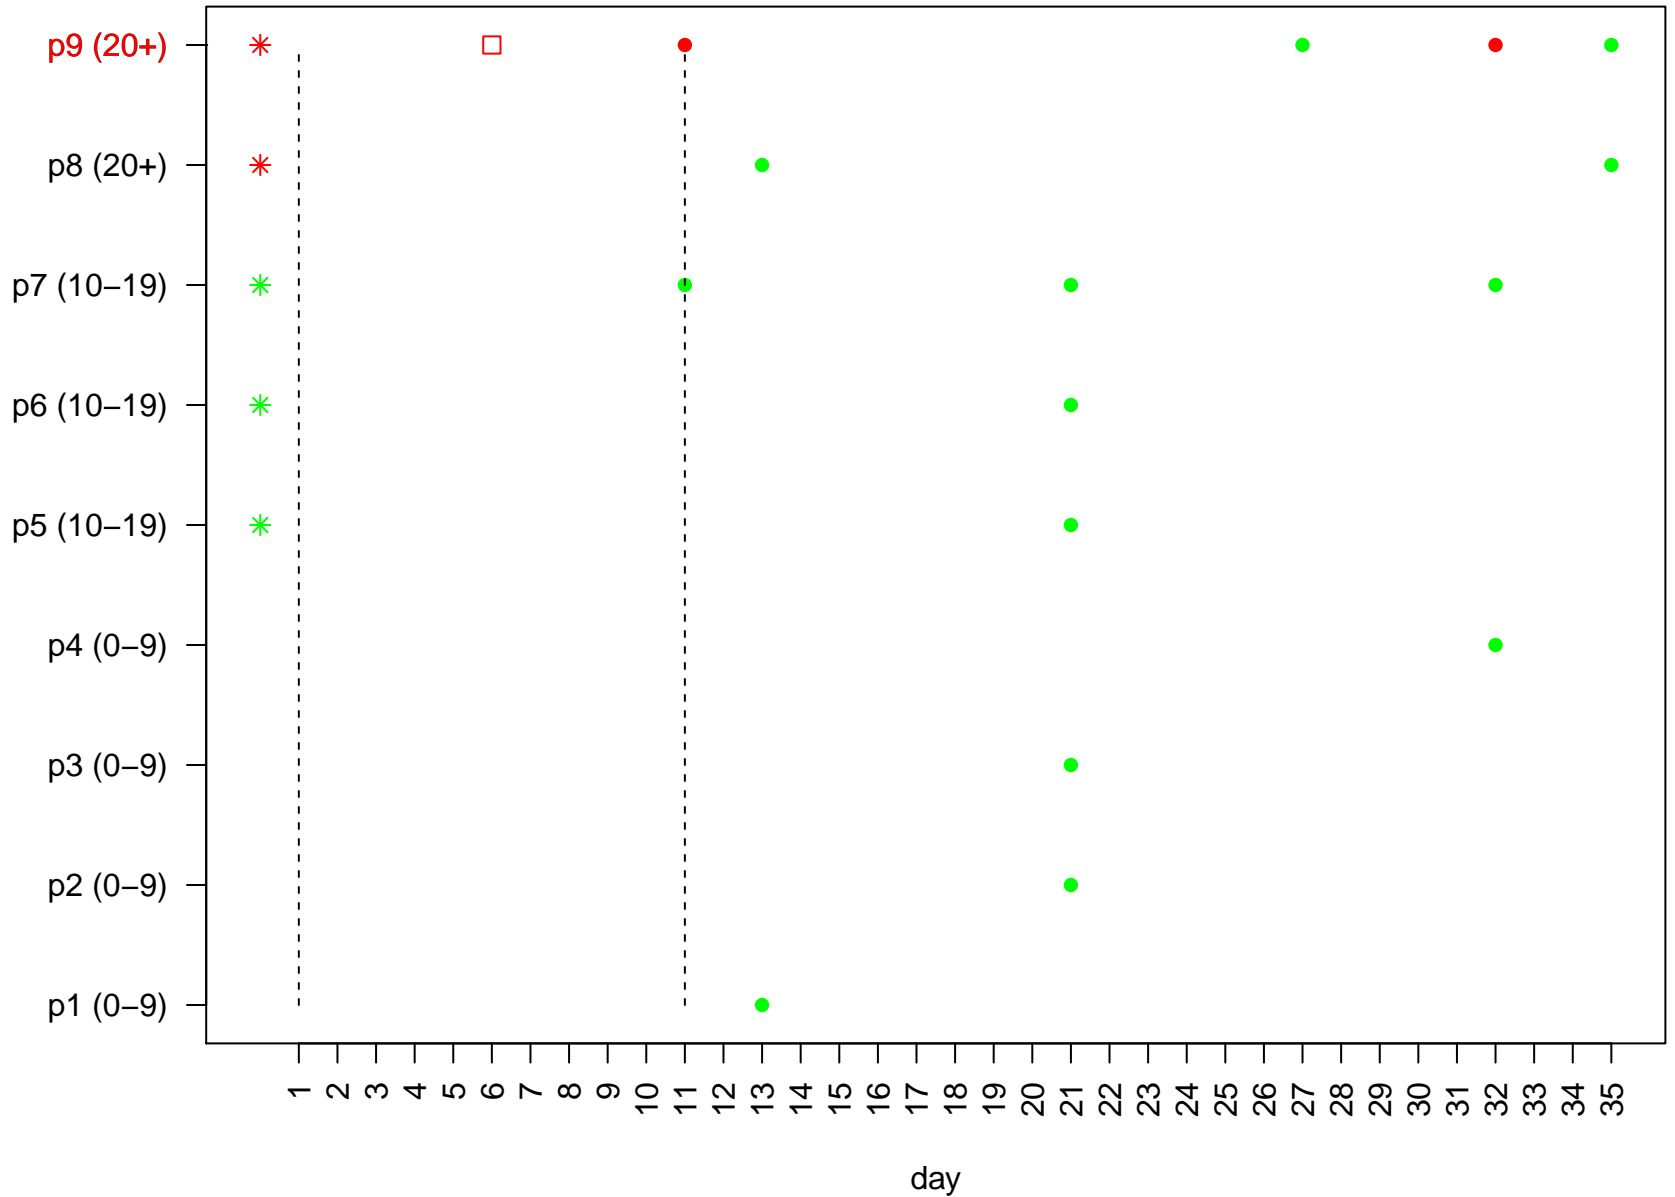



# Household 354

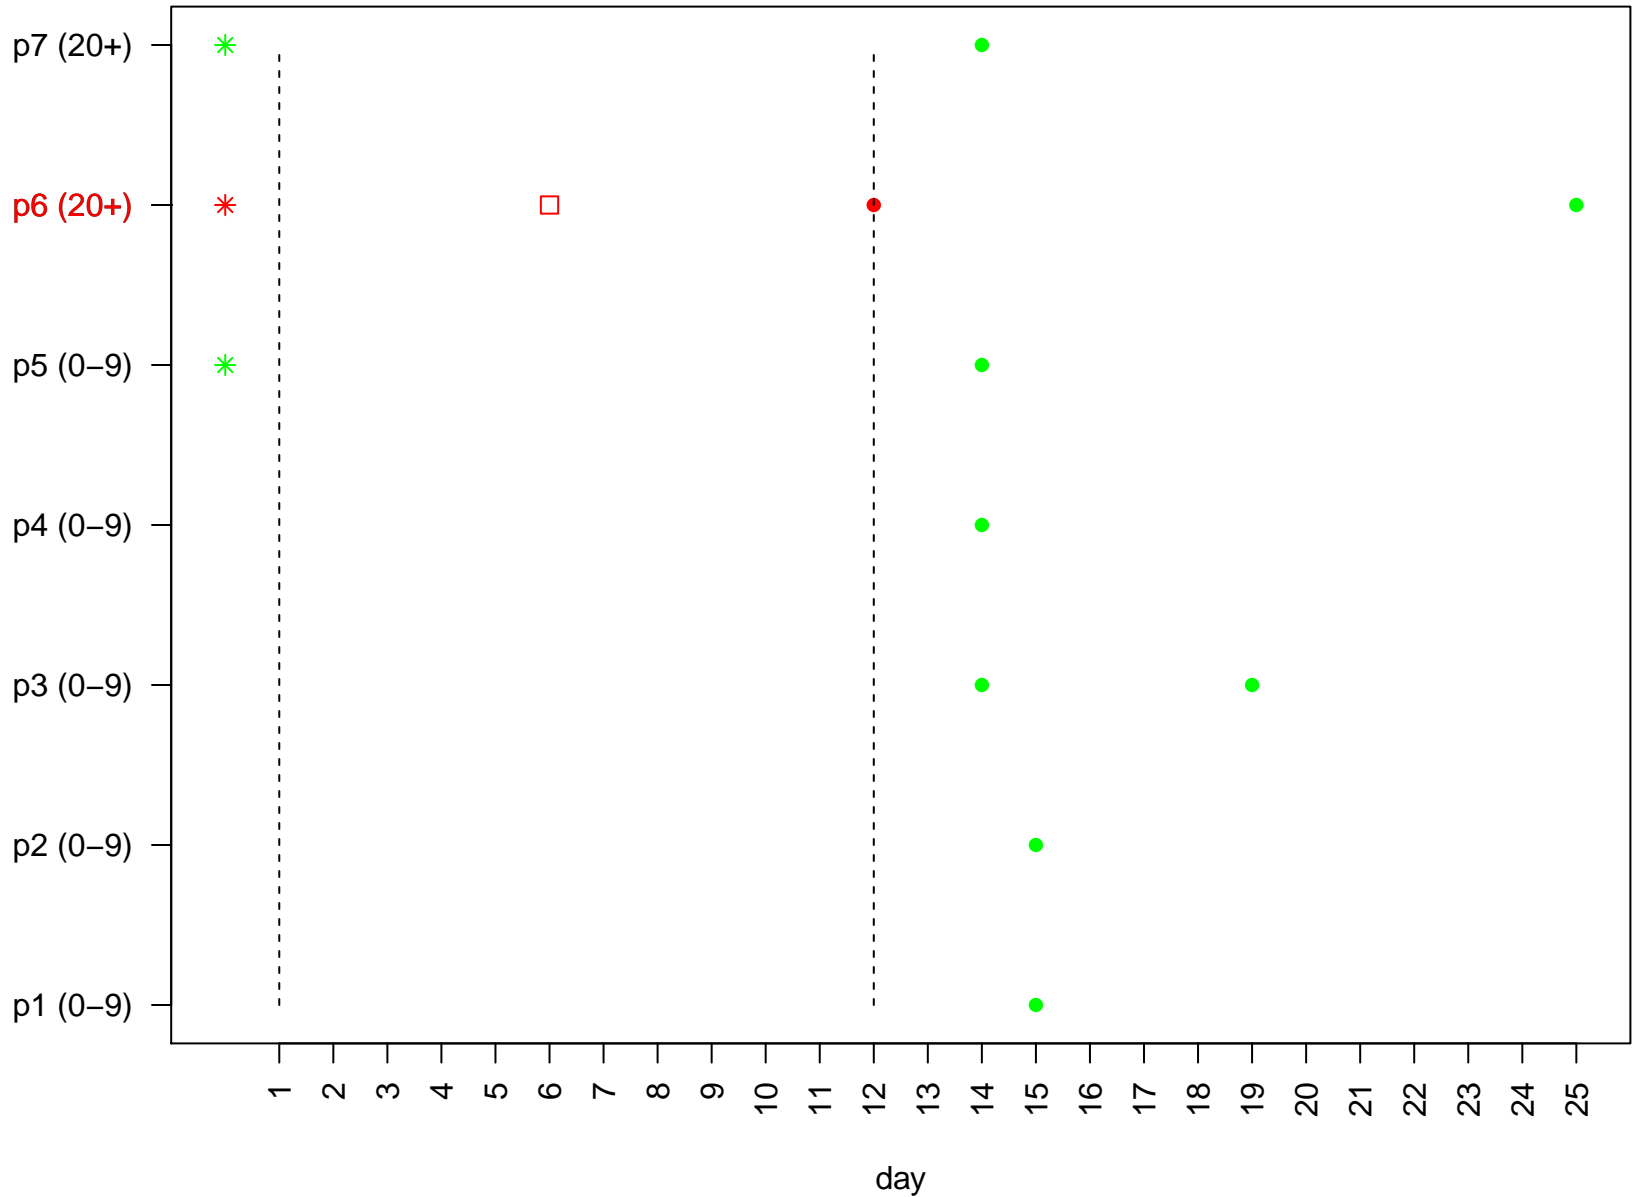

# Household 355

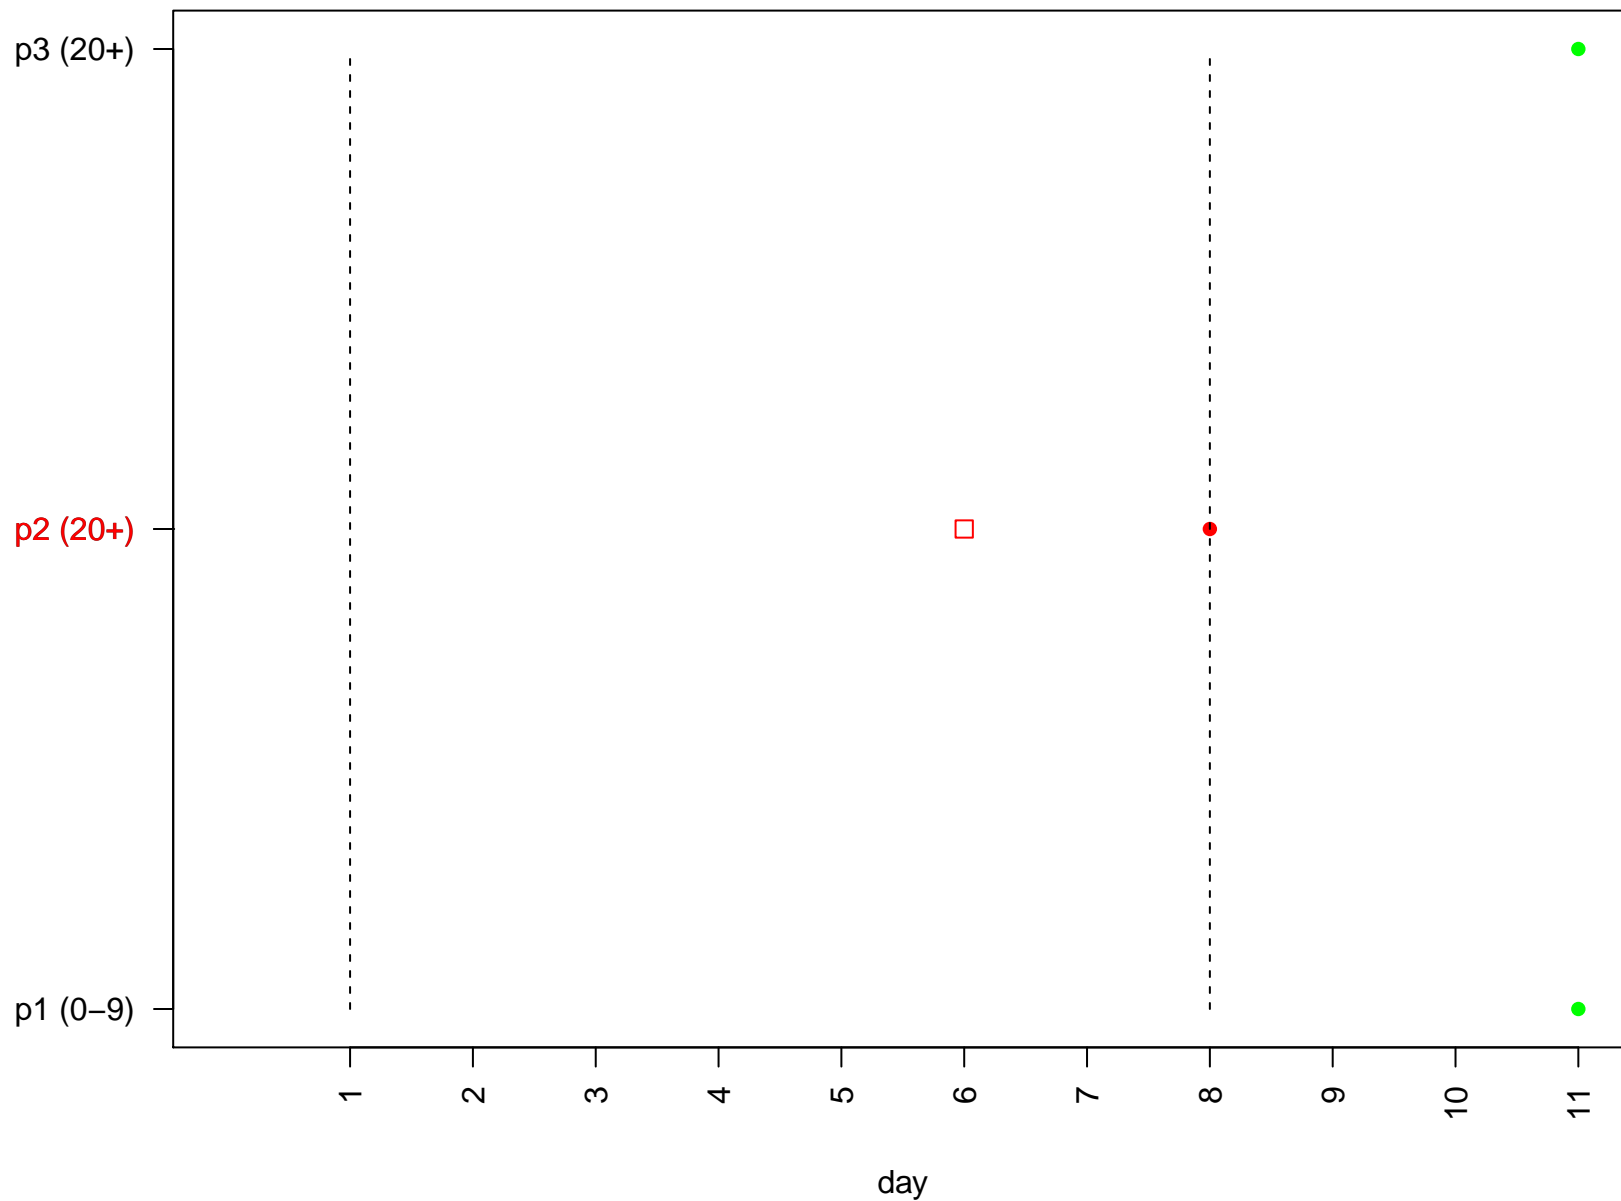

# Household 356

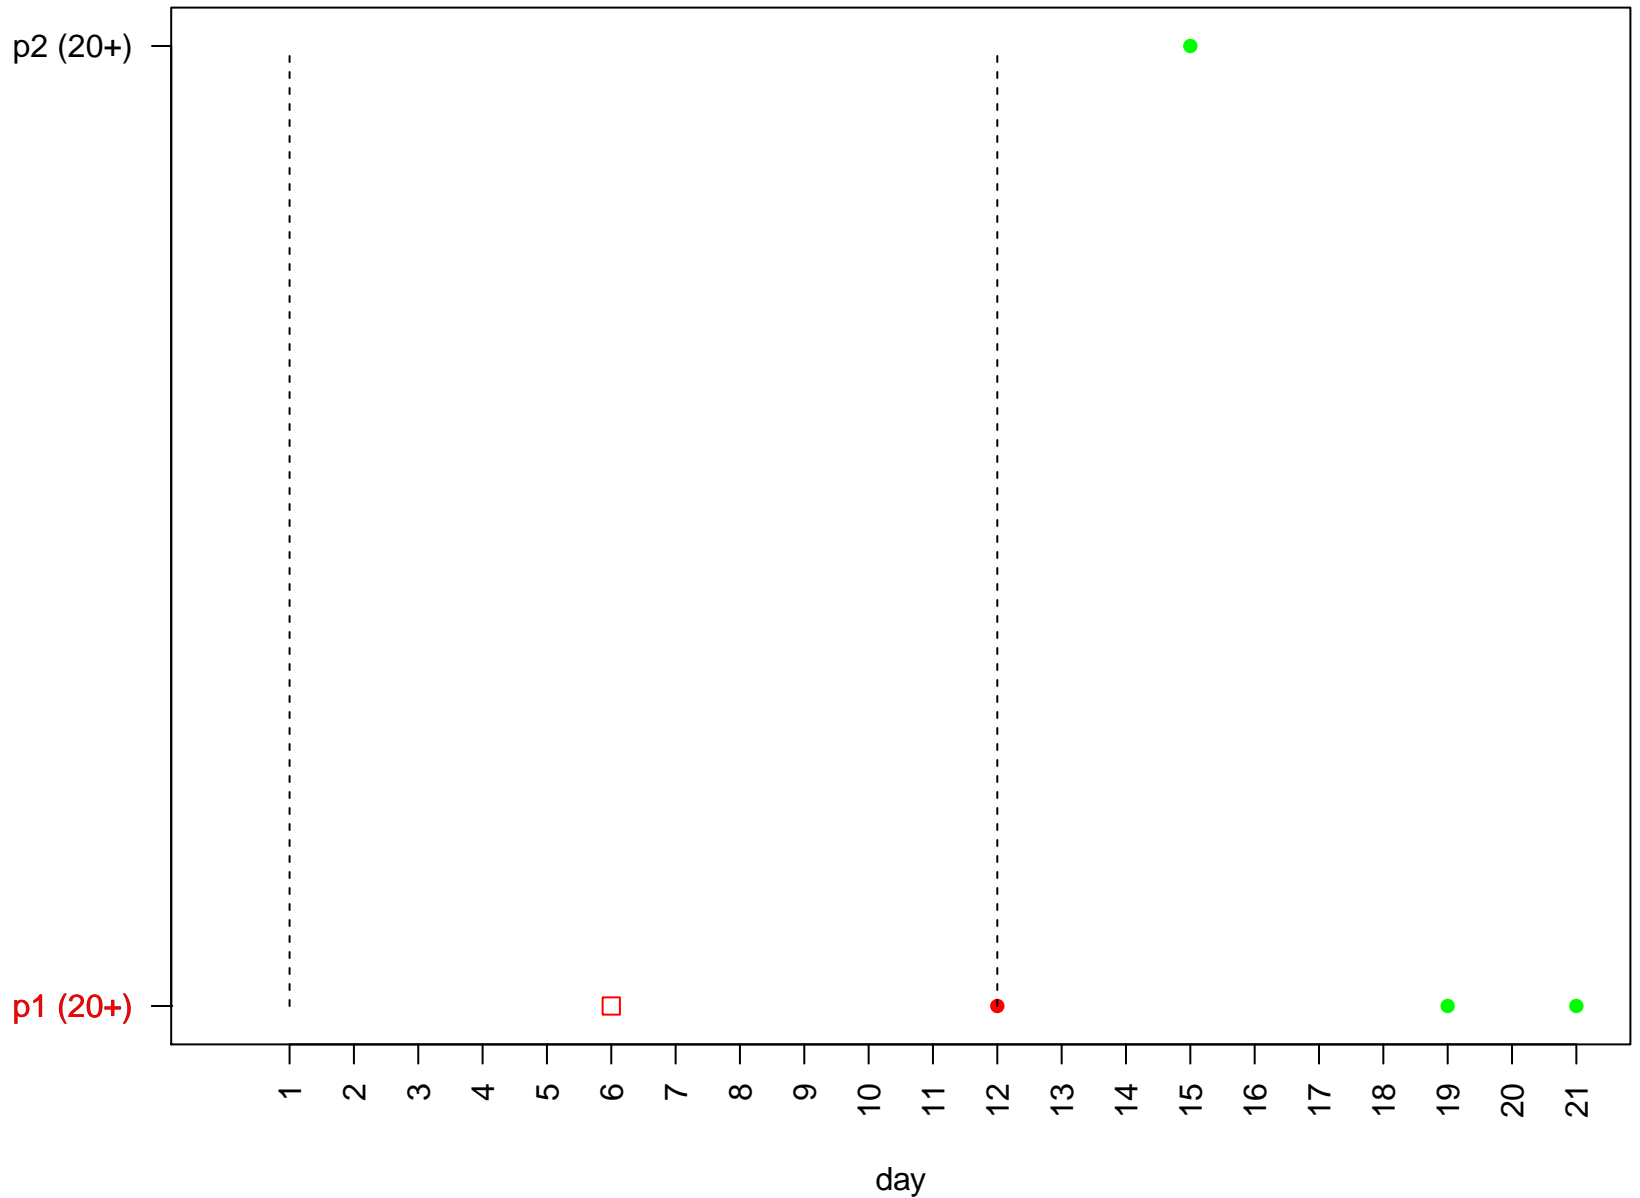

# Household 357

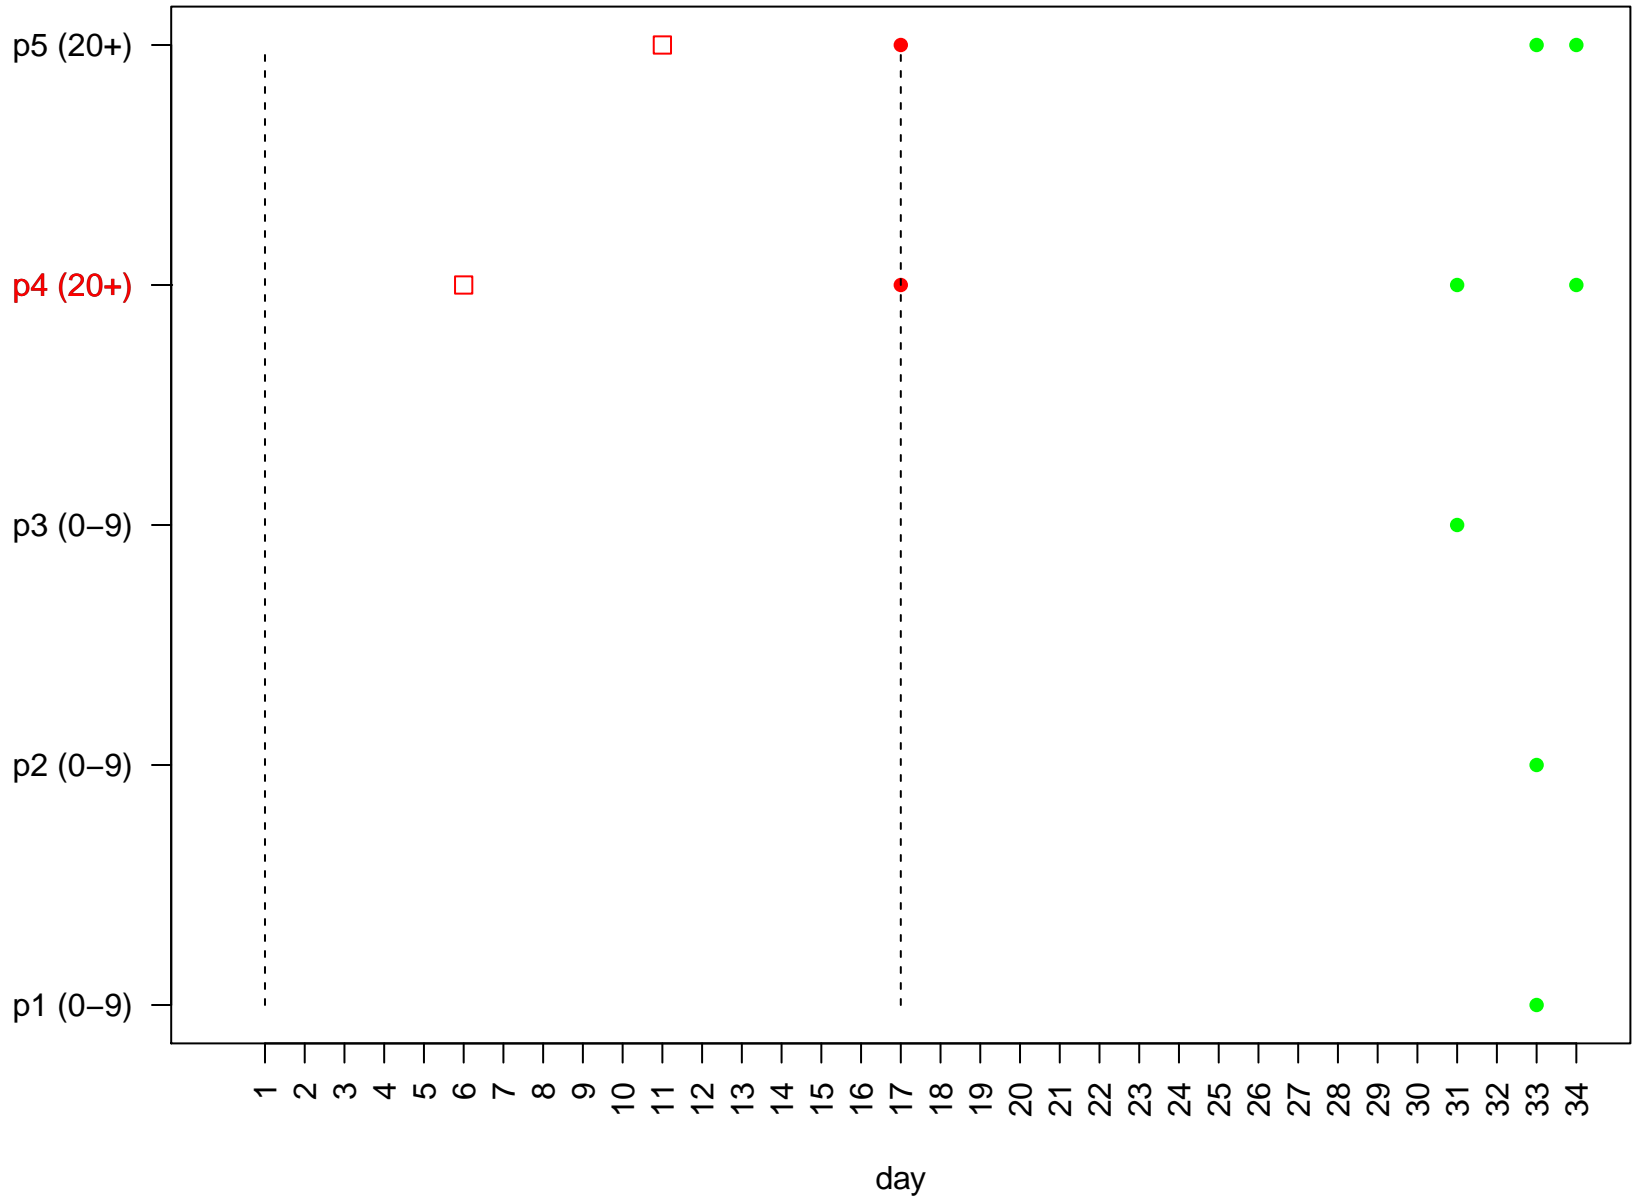

# Household 358

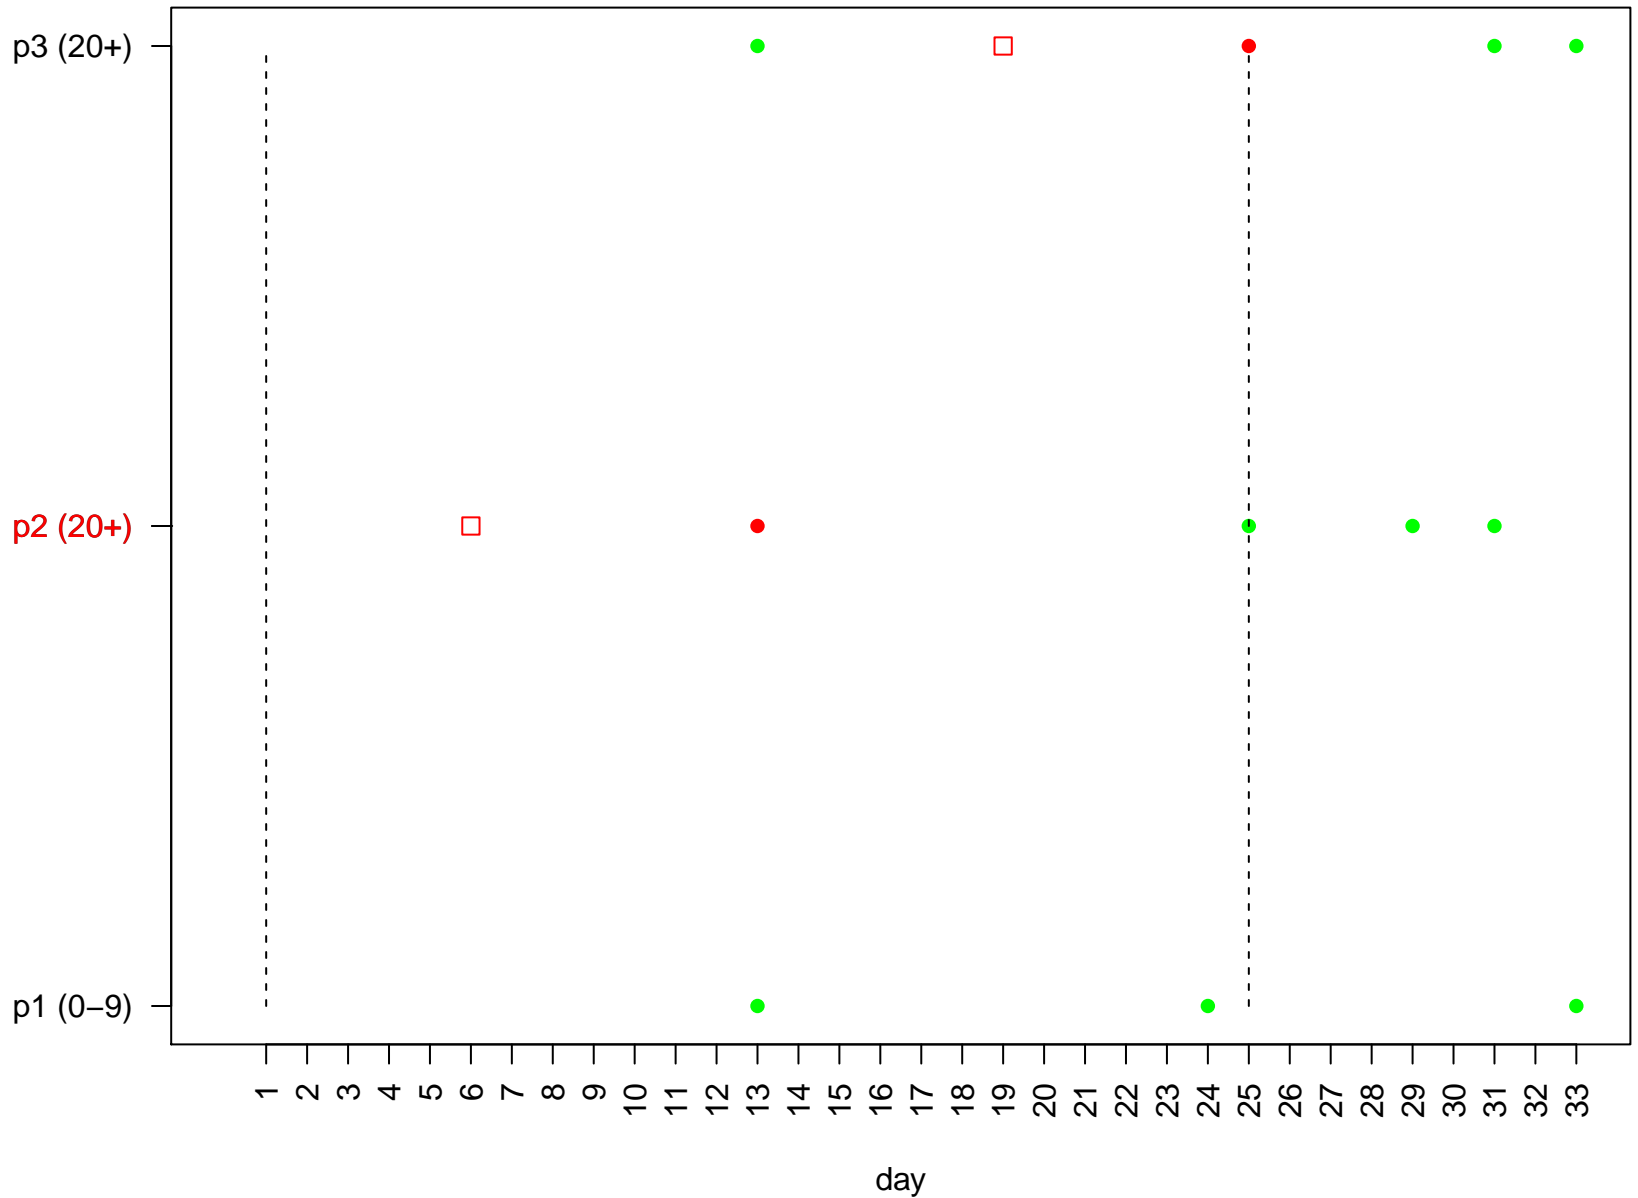

# Household 359

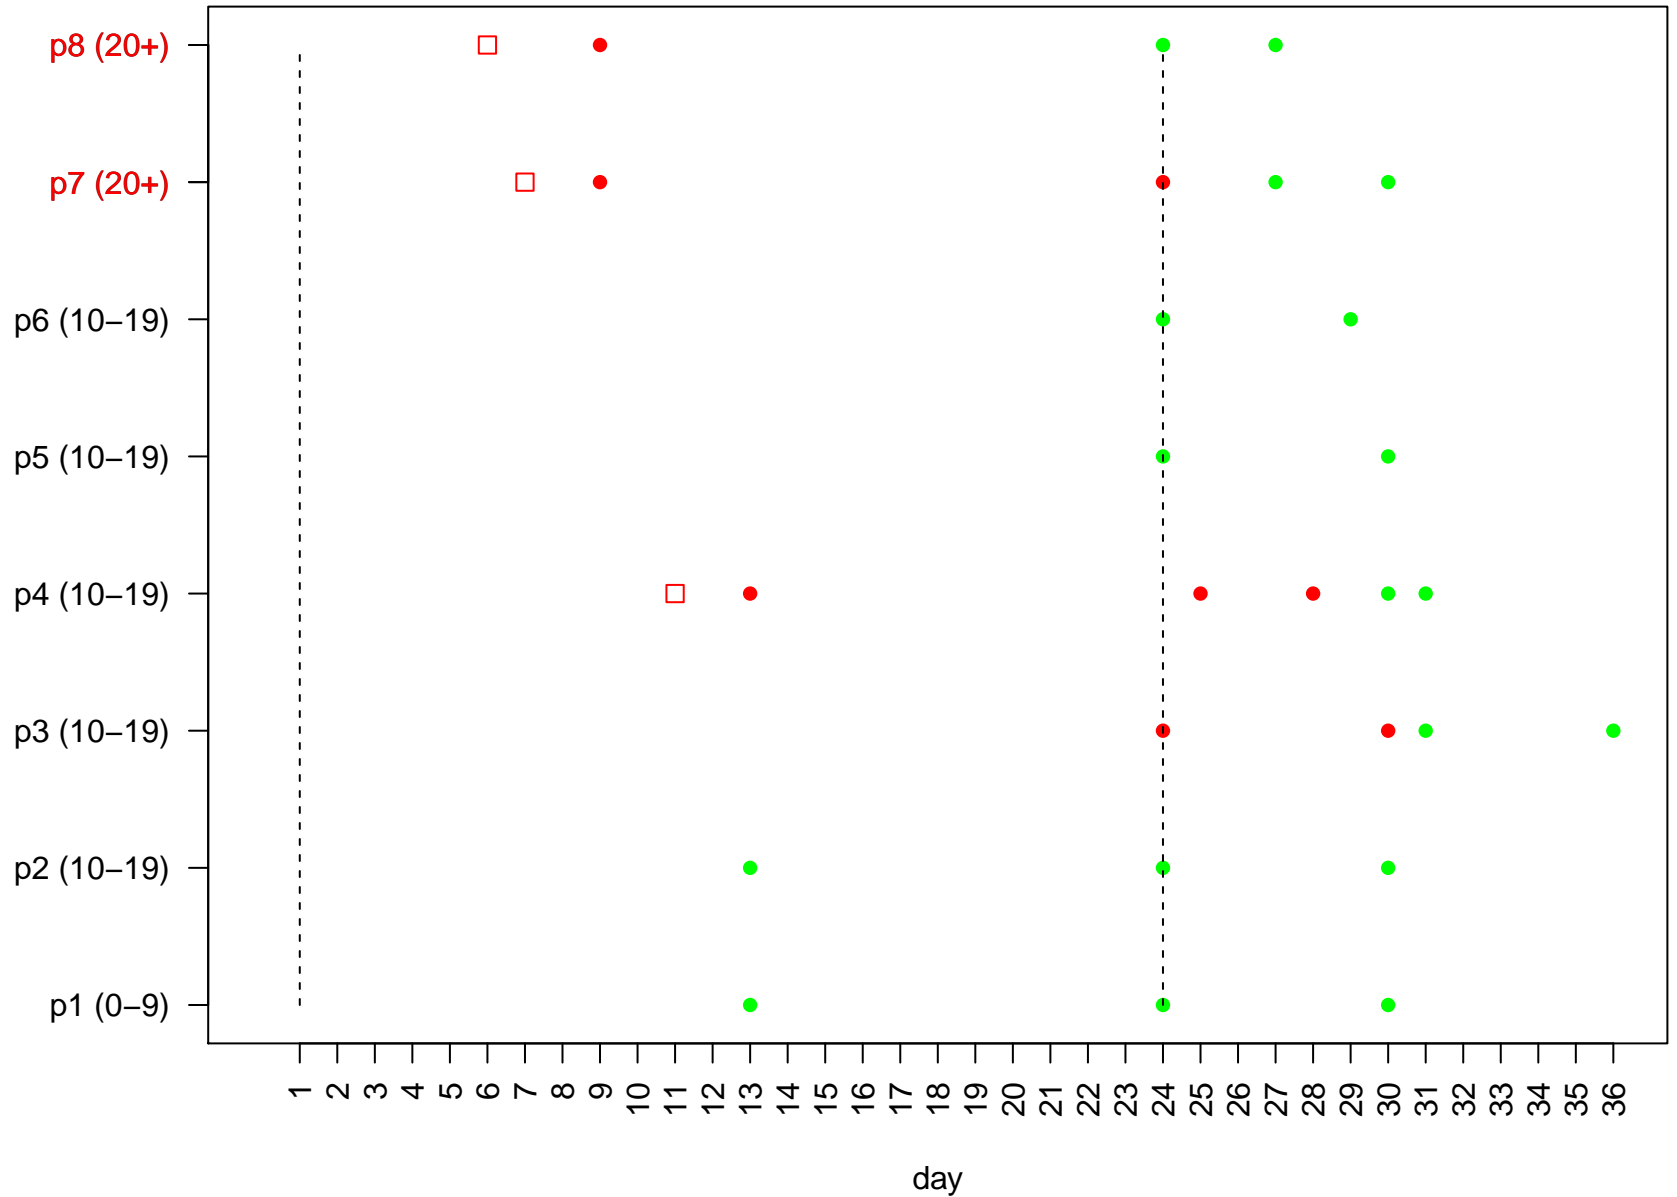

# Household 360

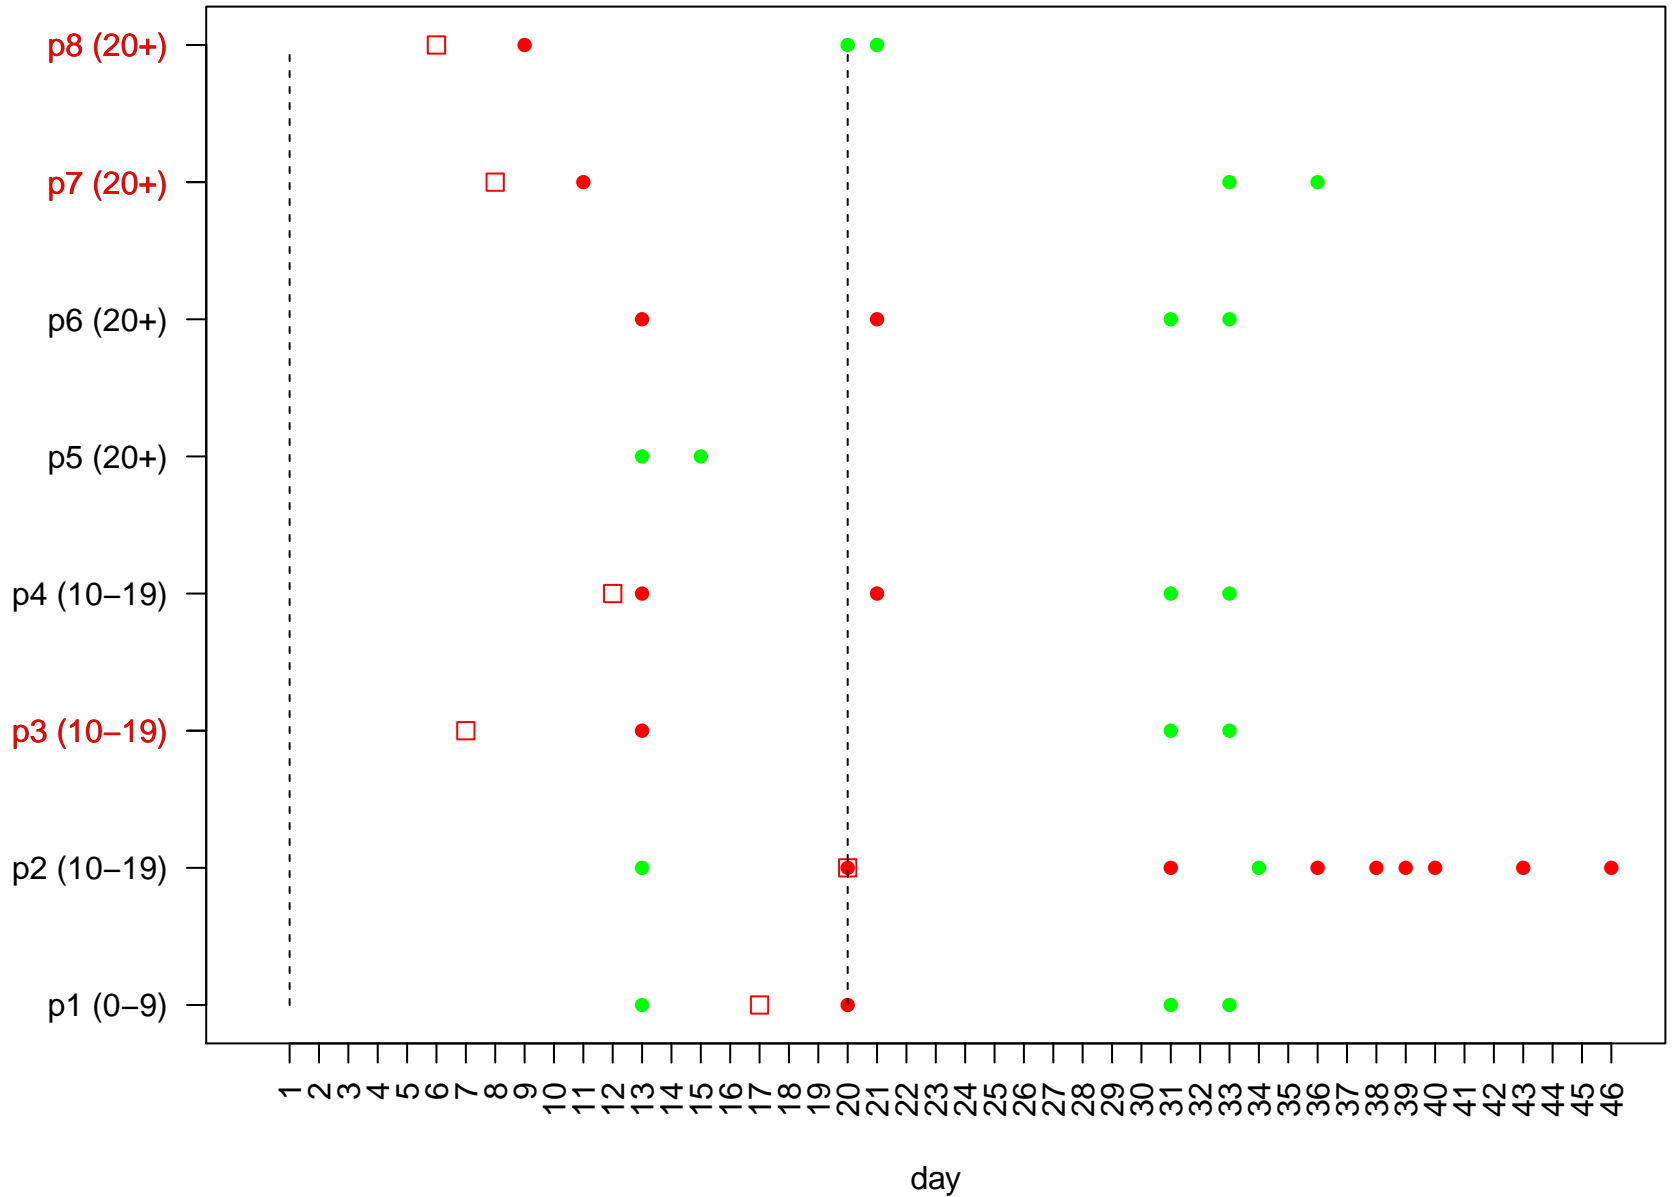

# Household 361

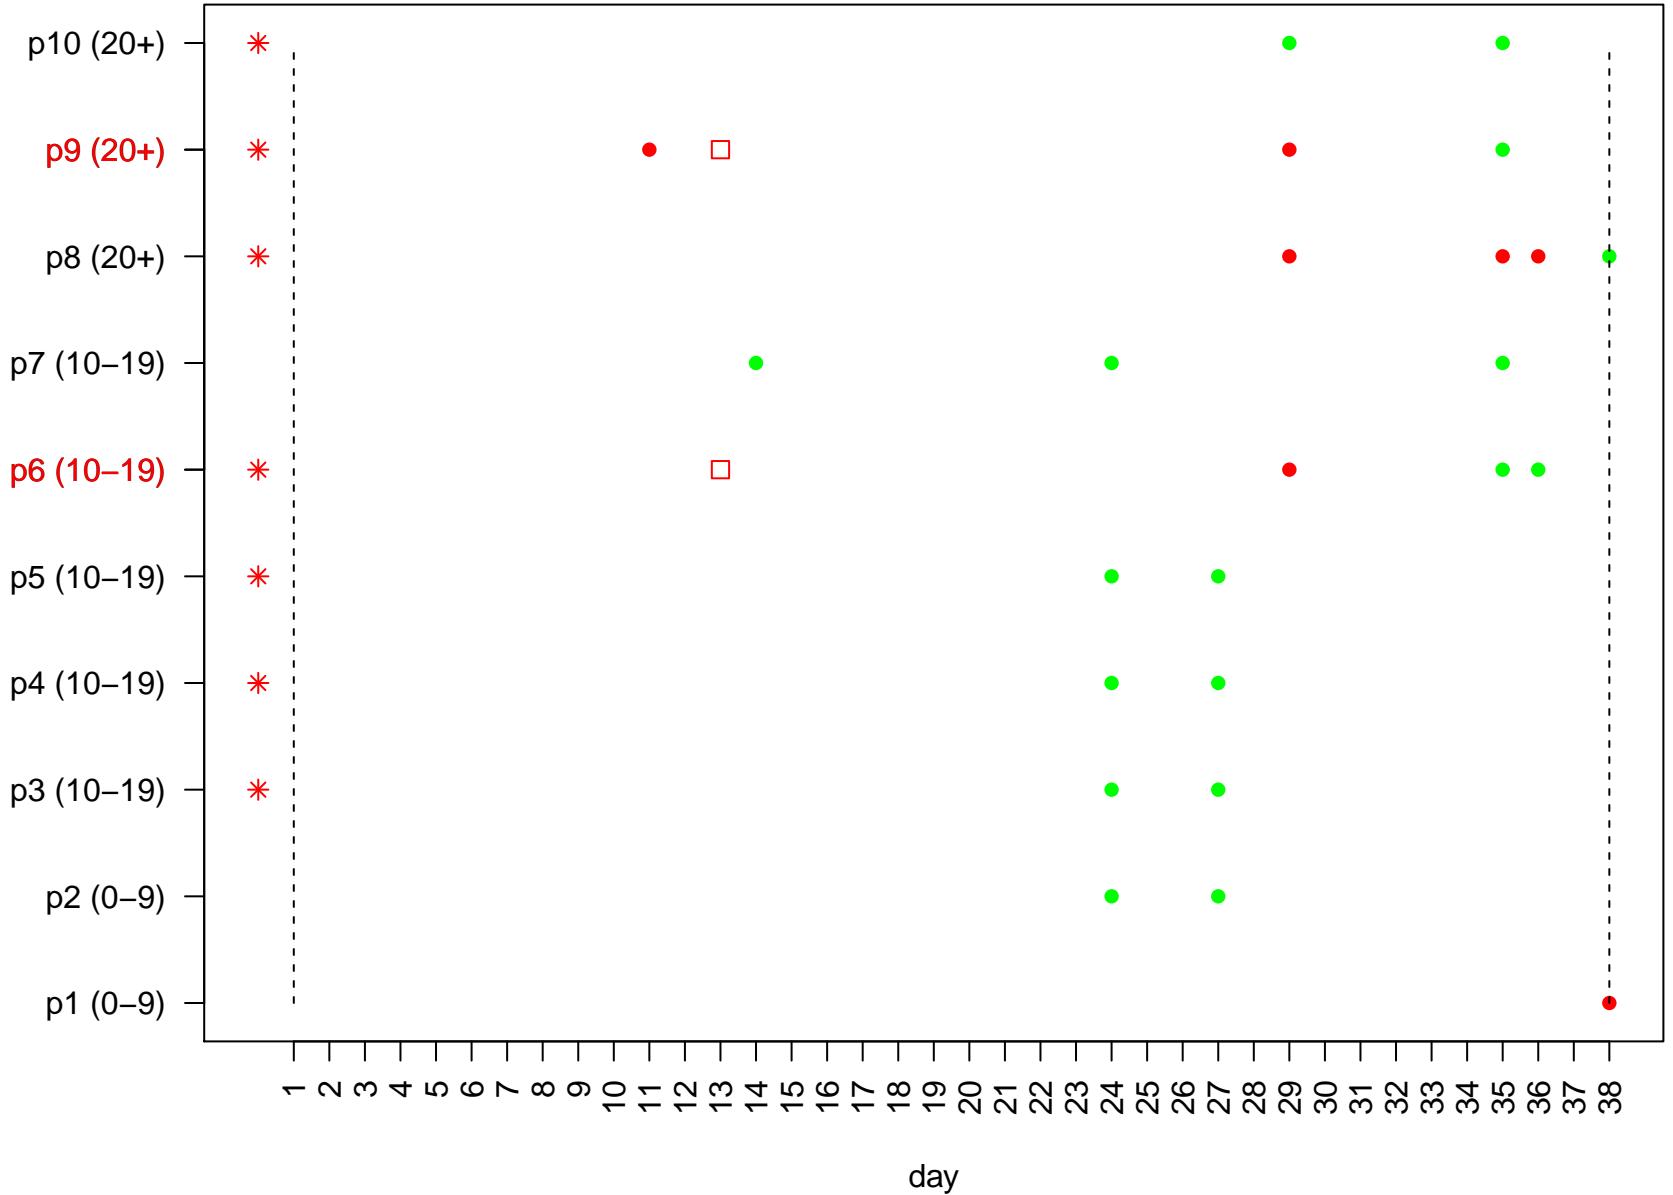



# Household 362

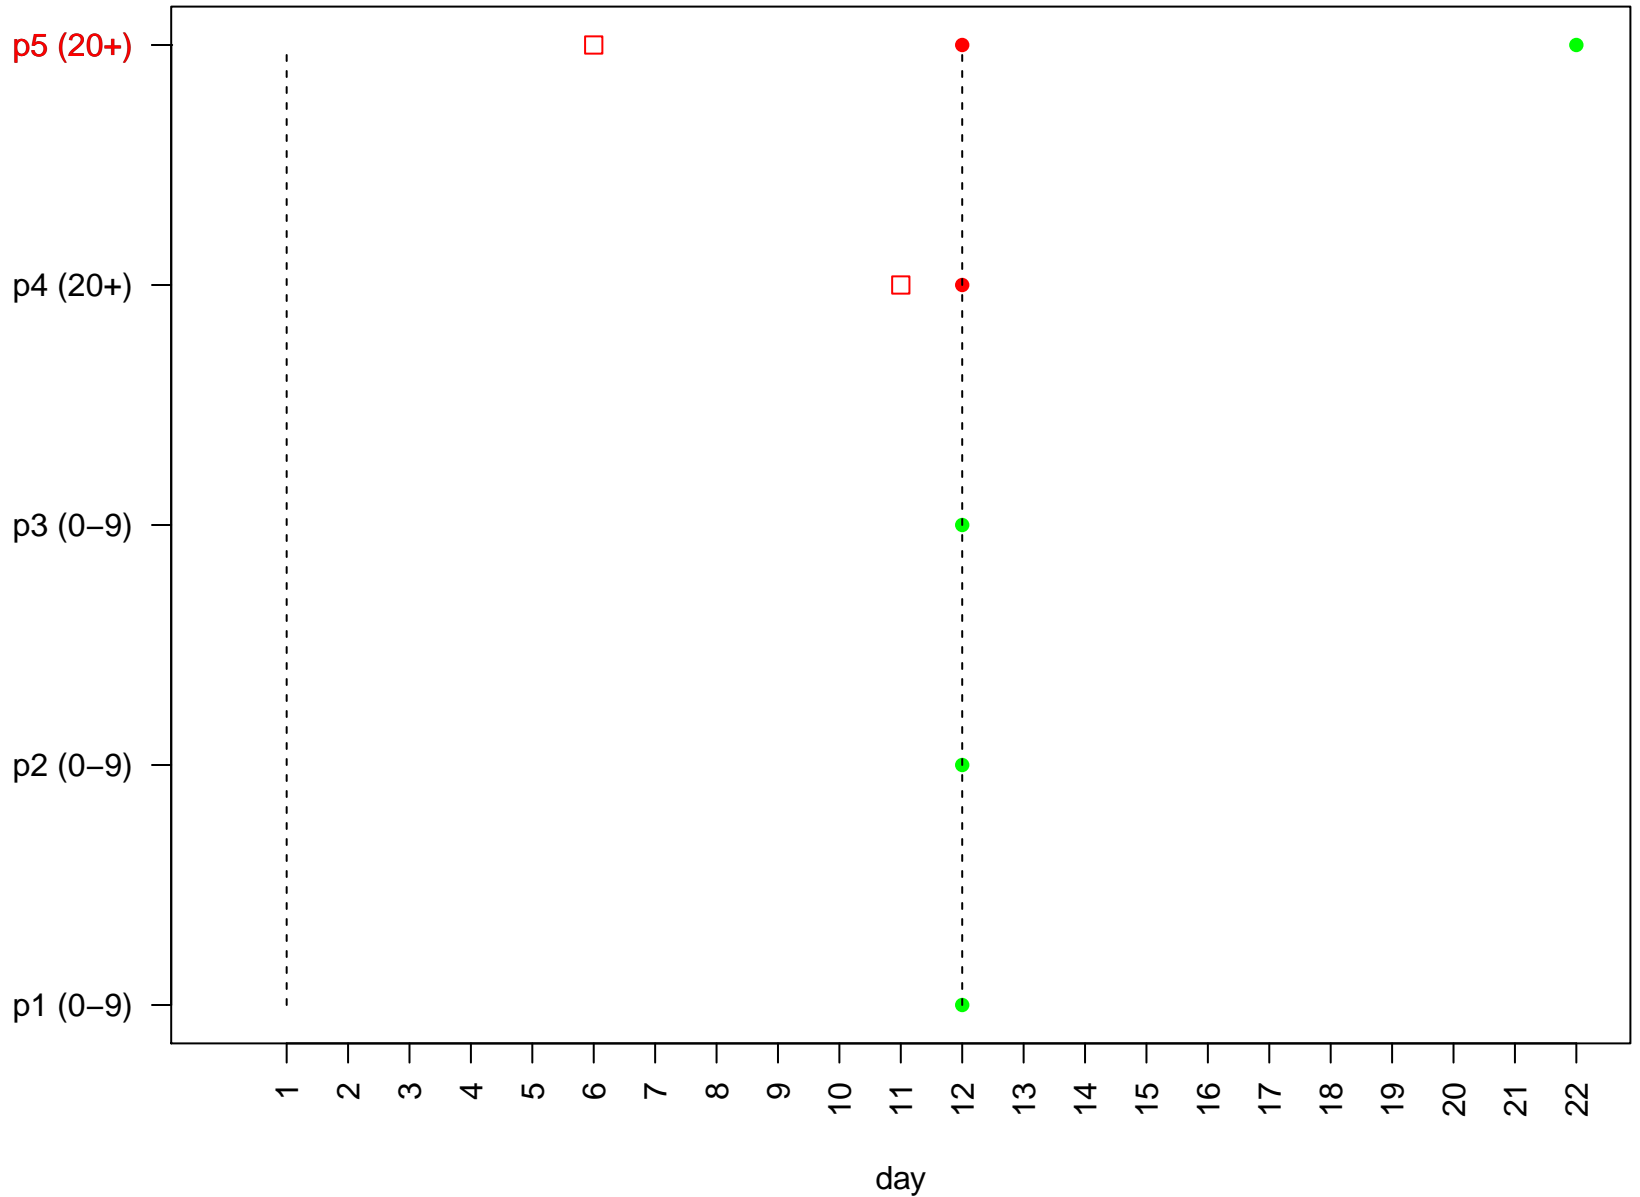

# Household 364

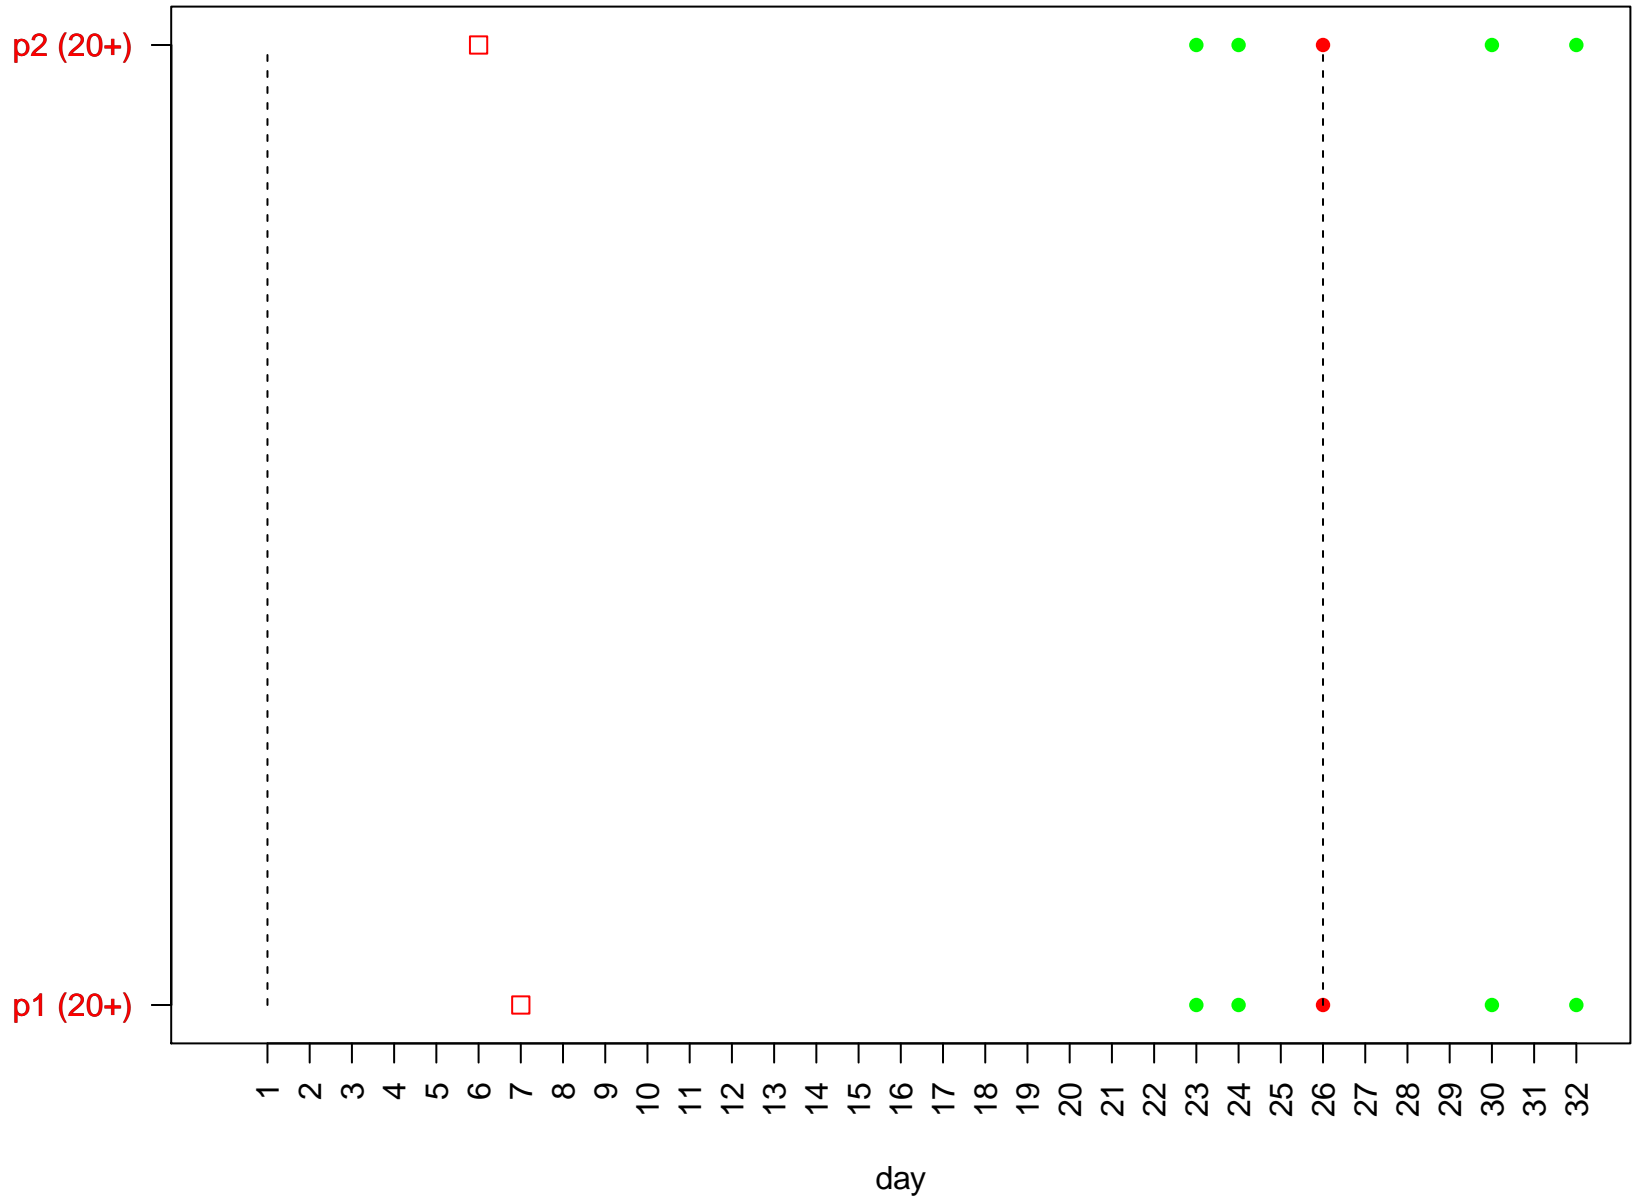

# Household 365

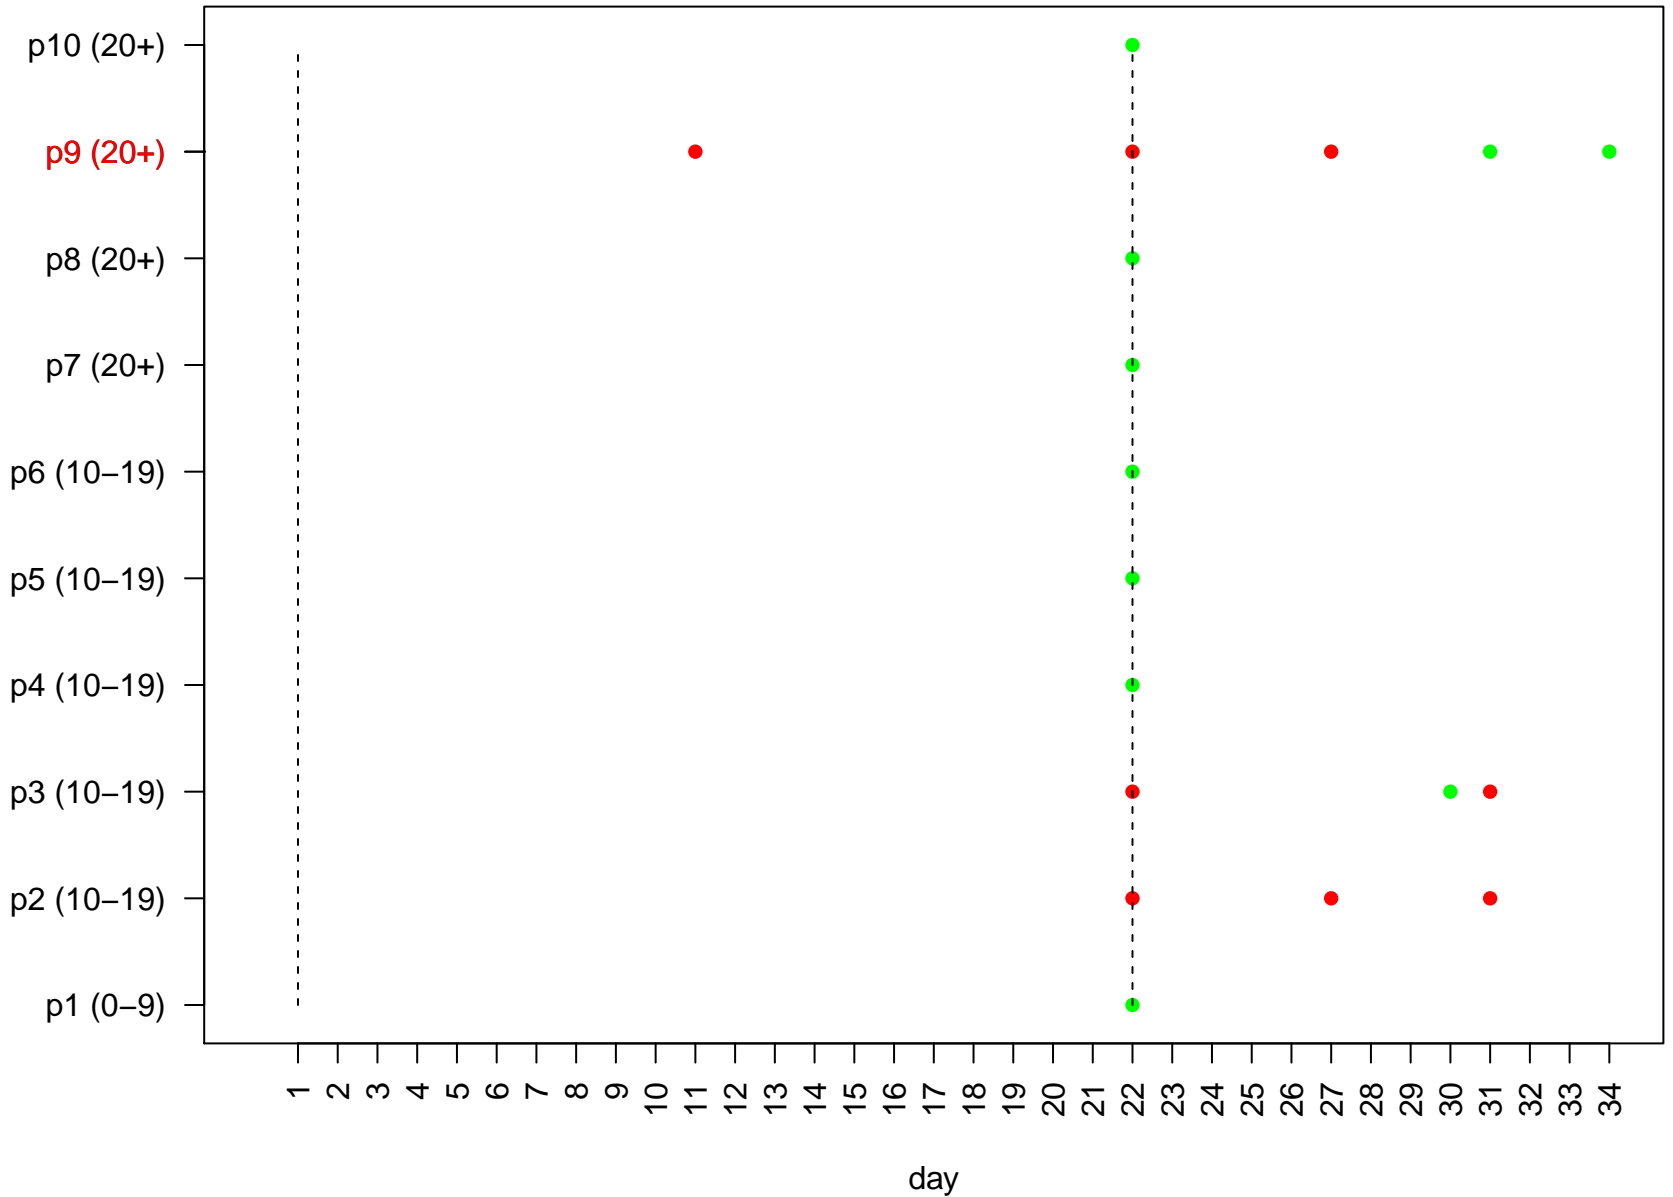

# Household 366

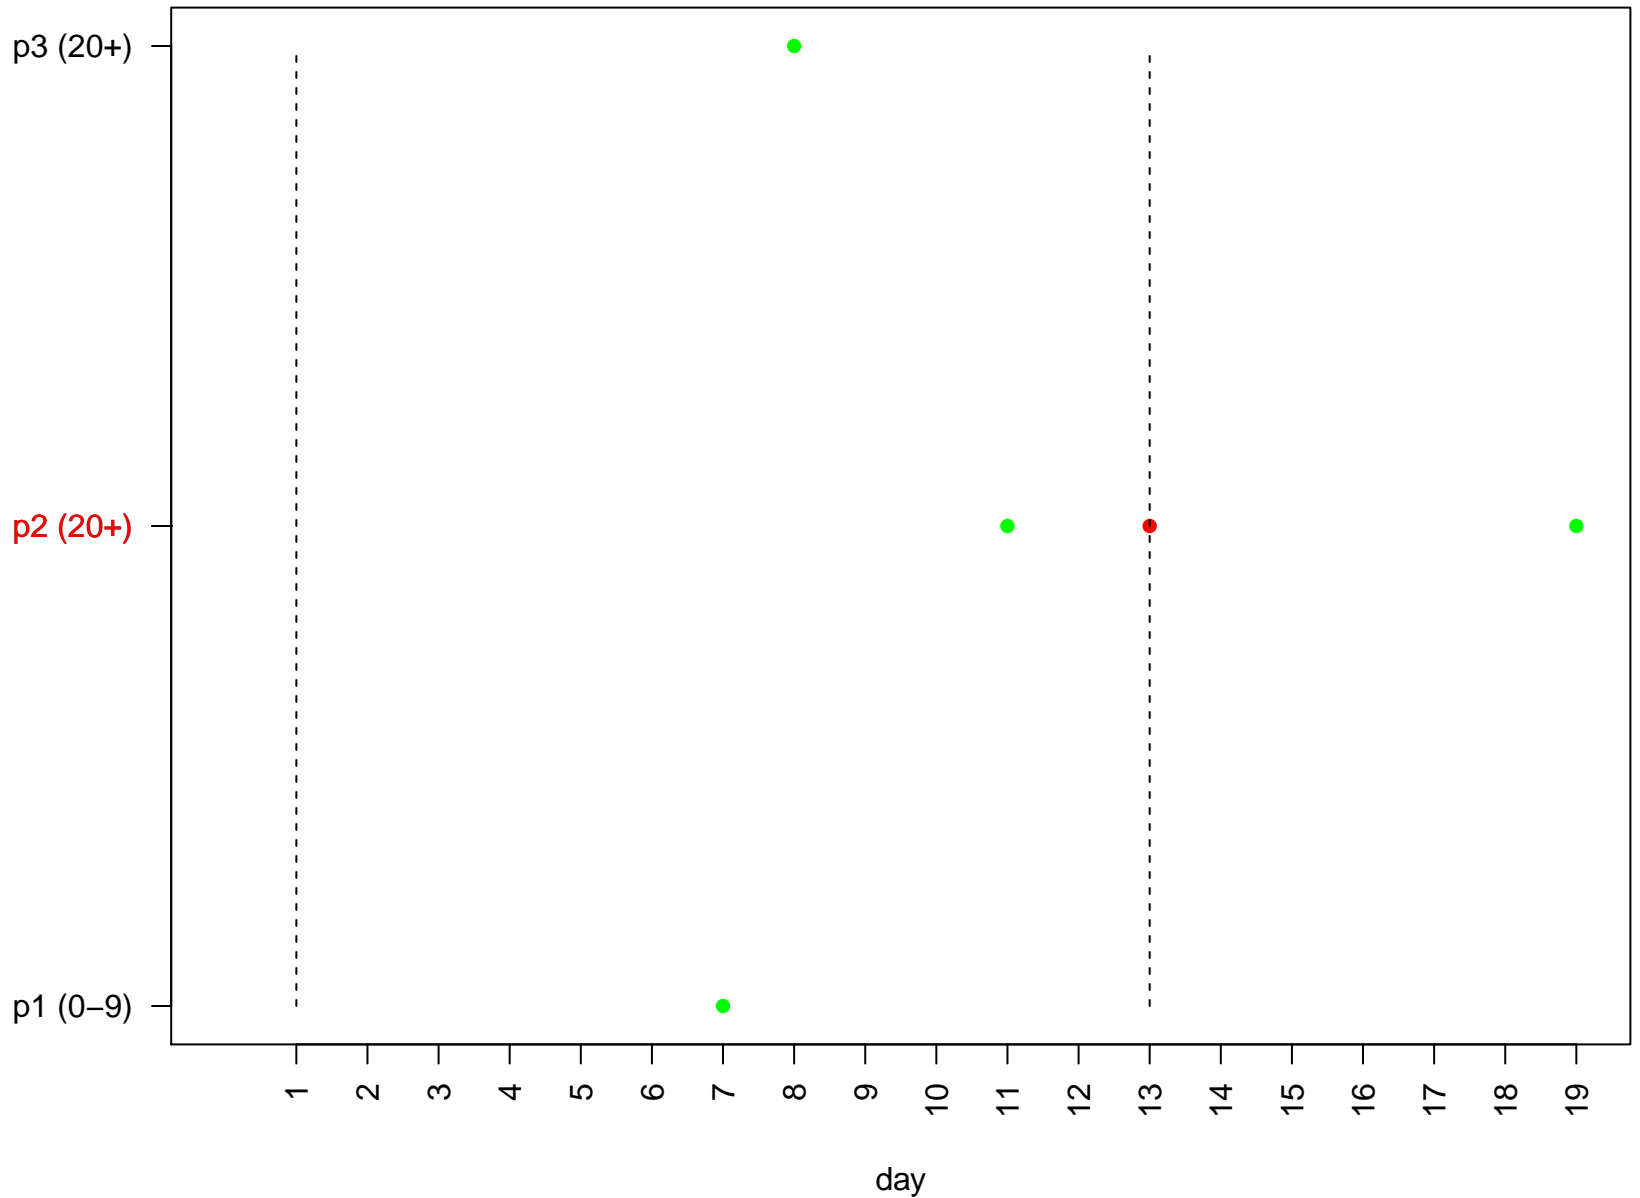

# Household 367

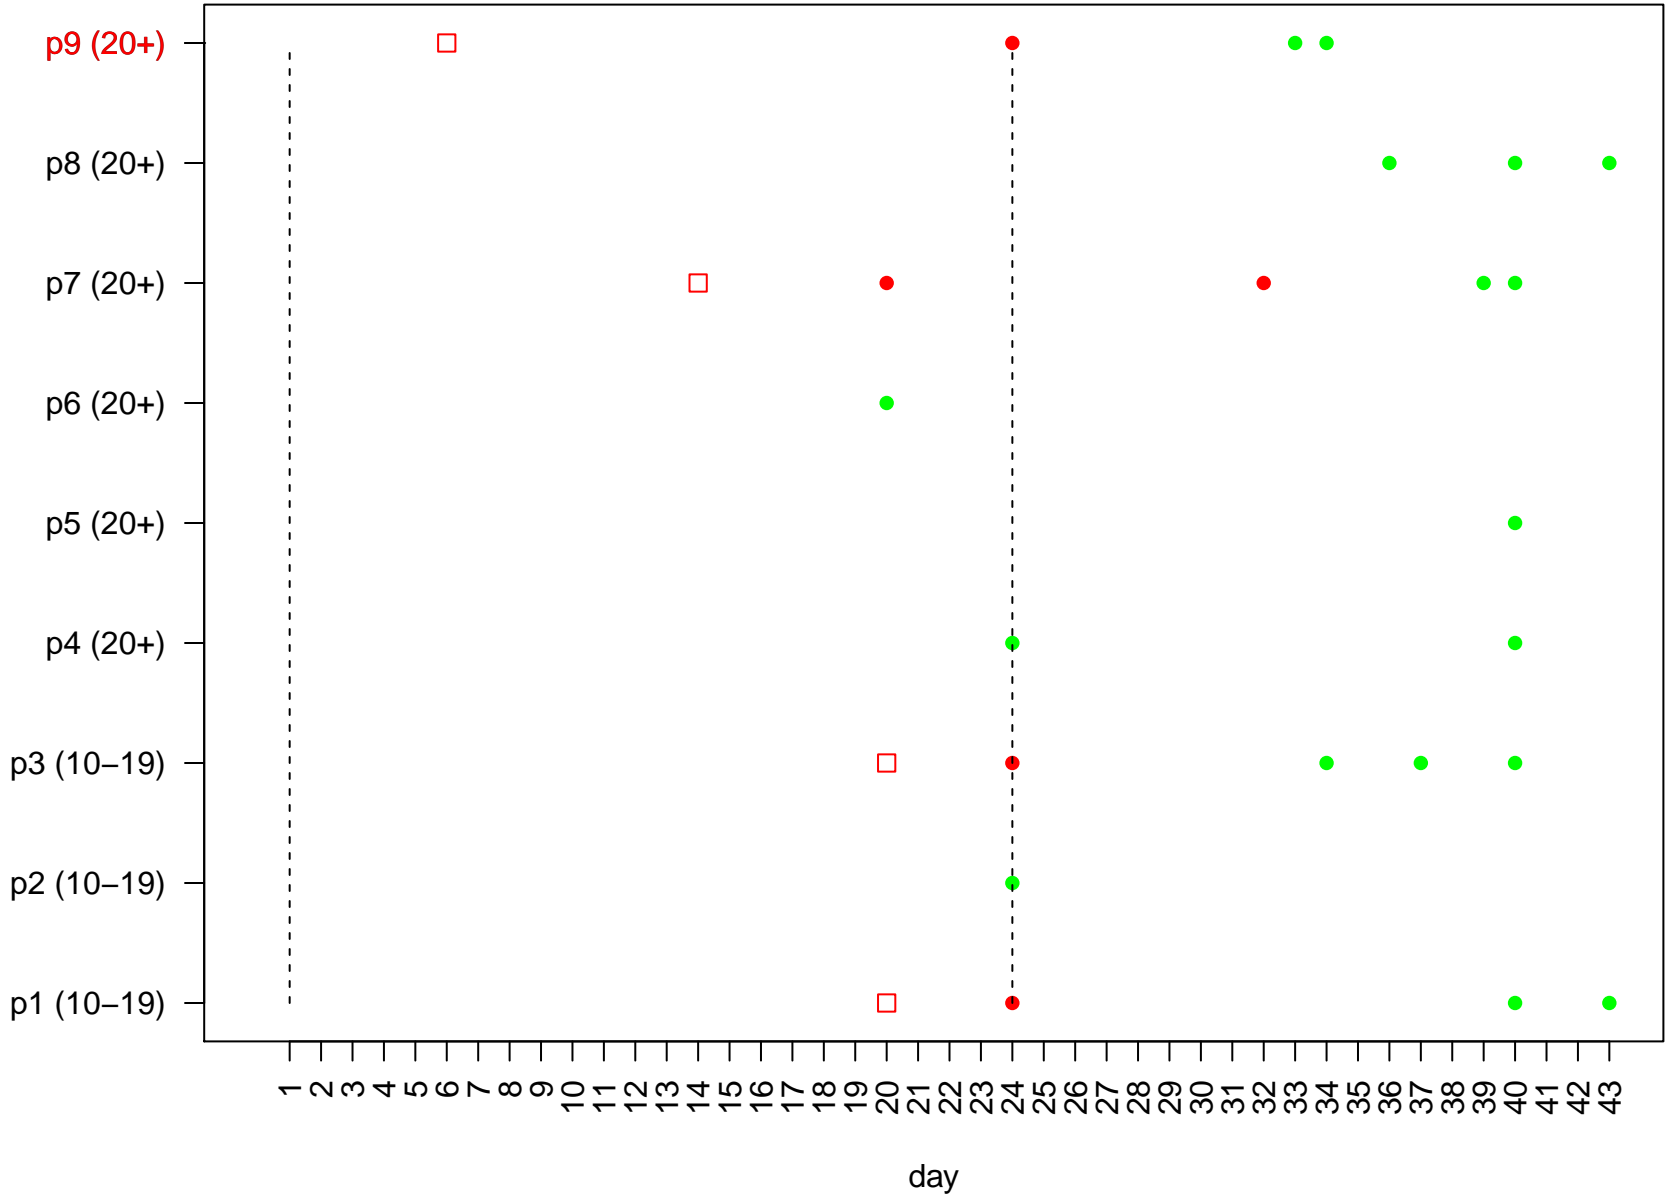

# Household 368

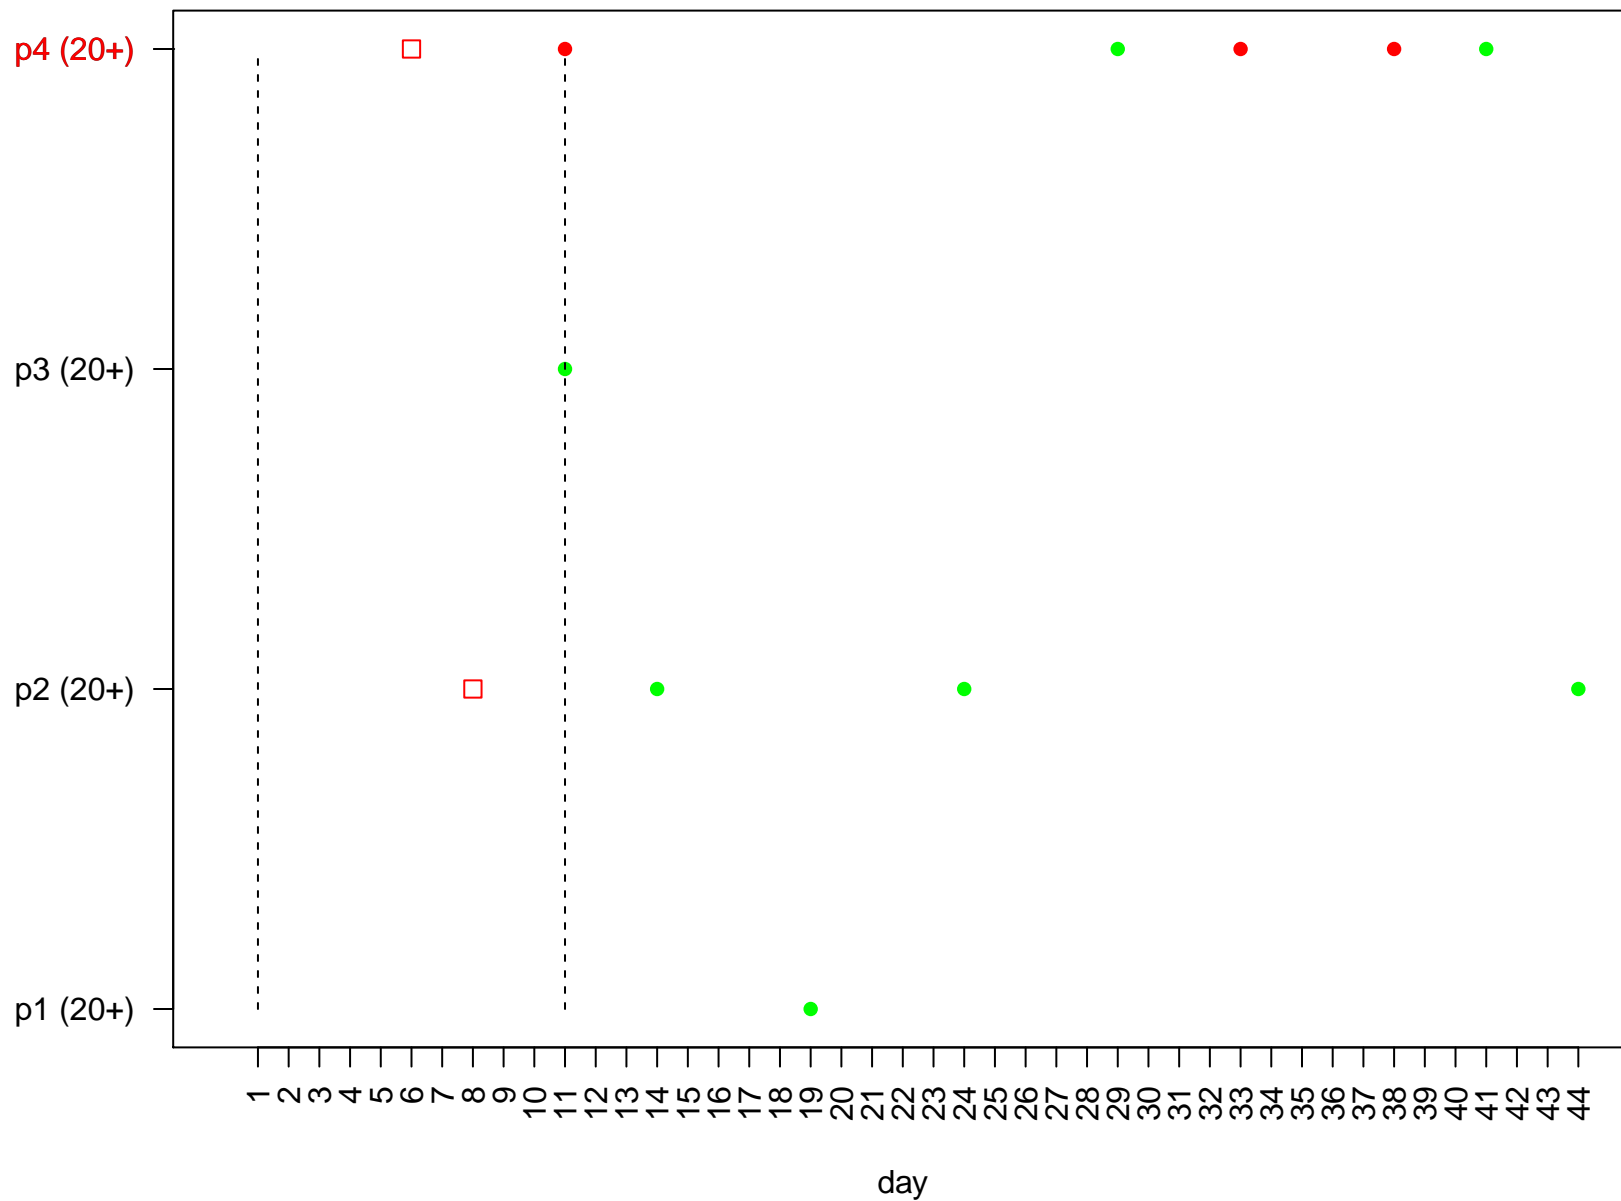

# Household 369

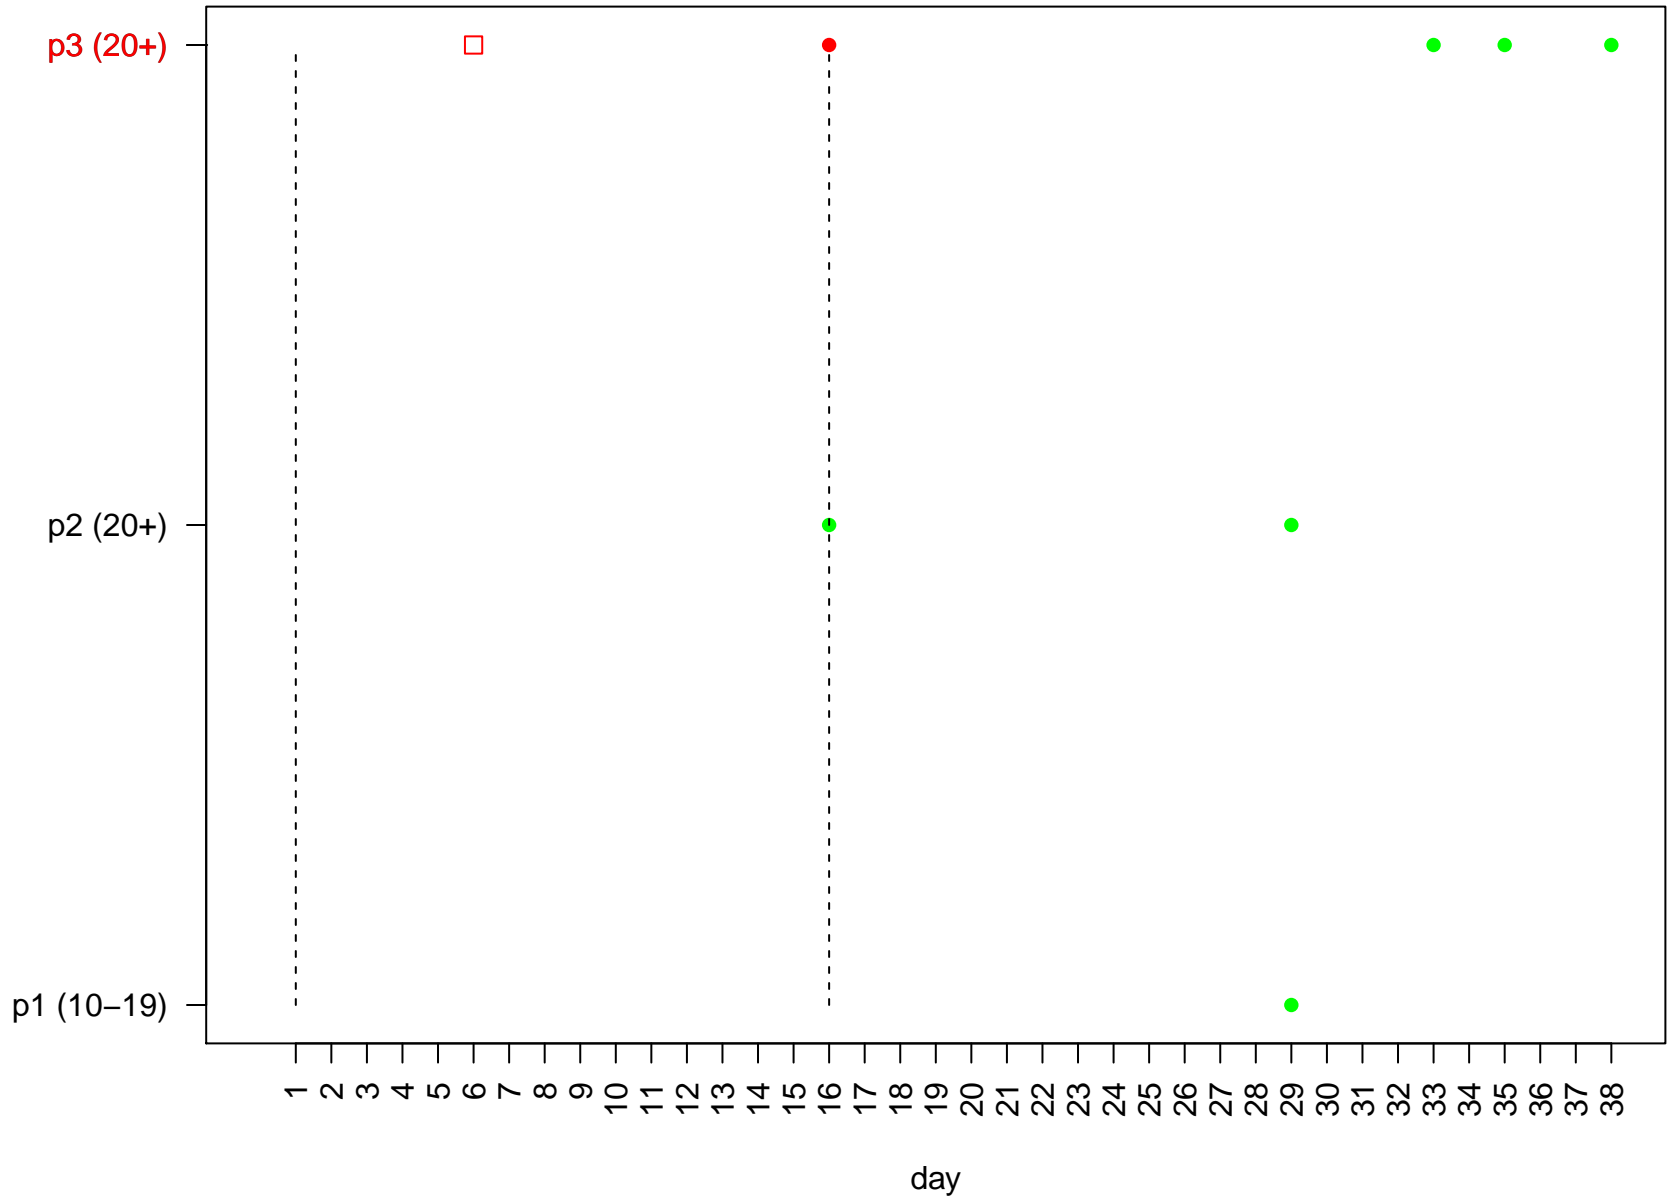

# Household 370

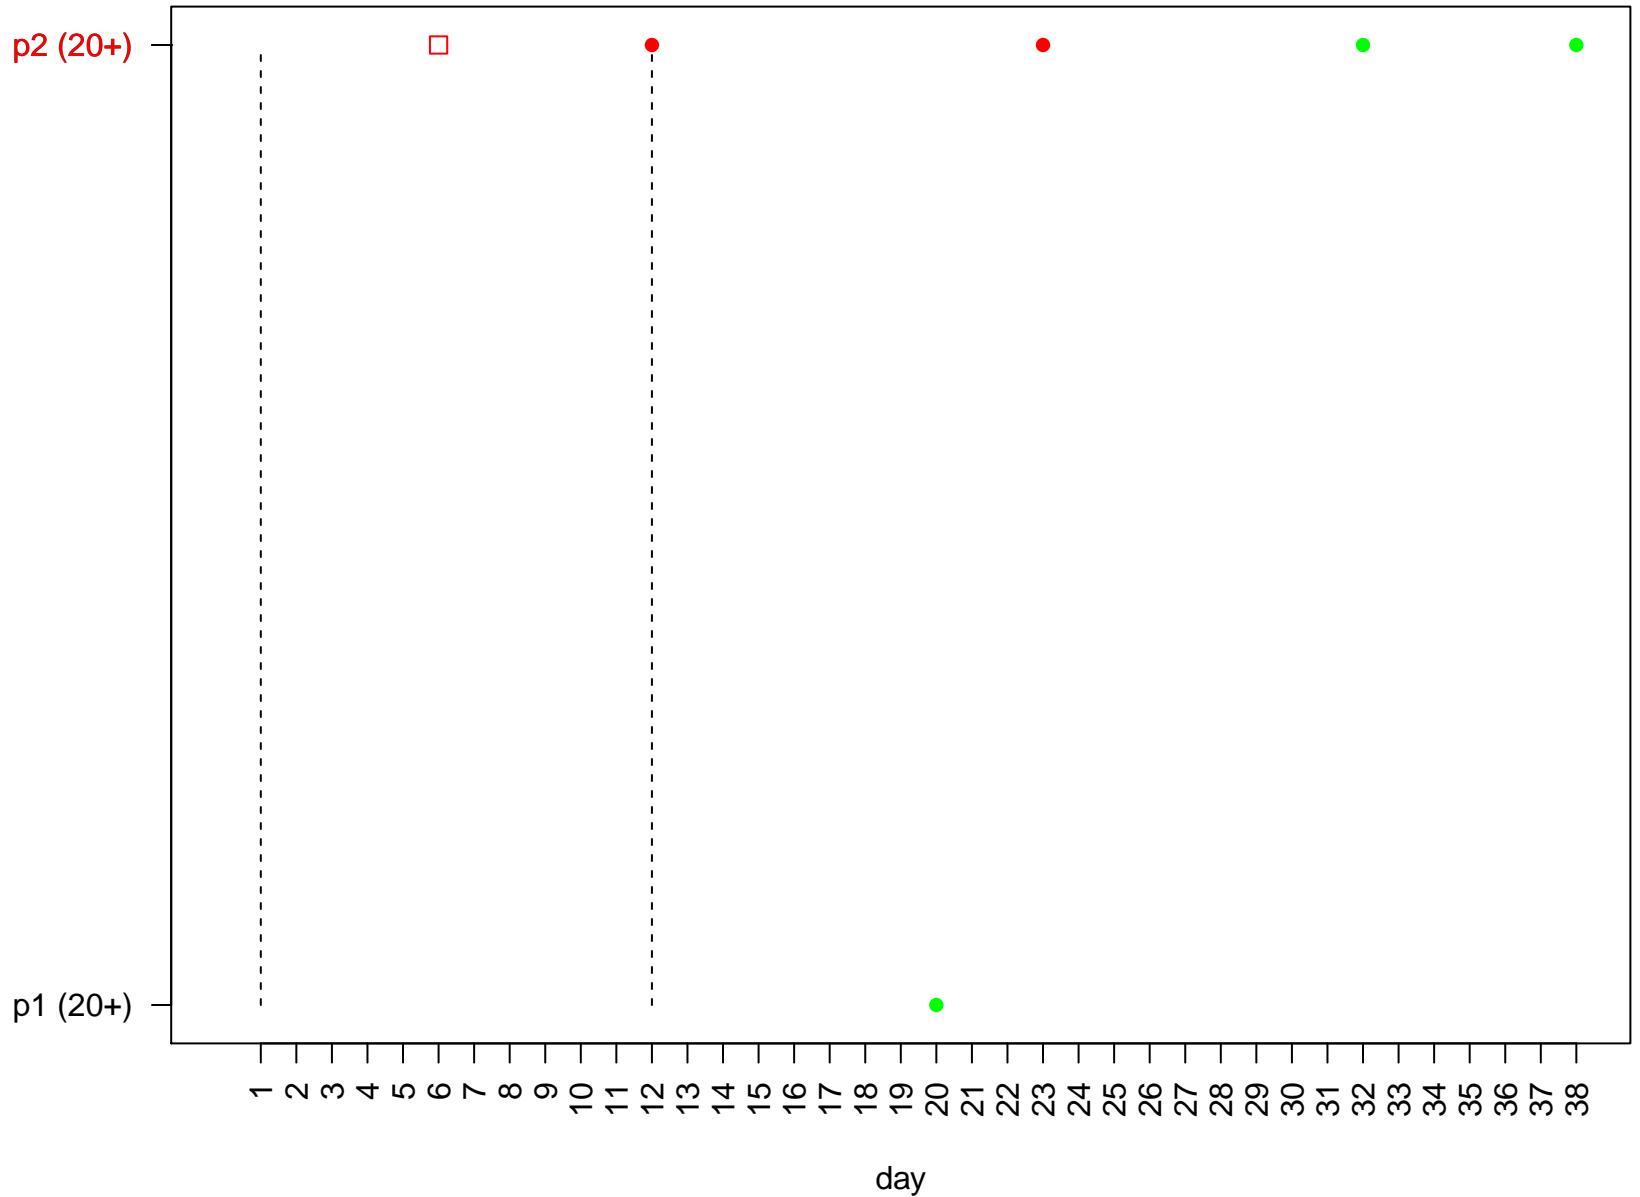



# Household 371

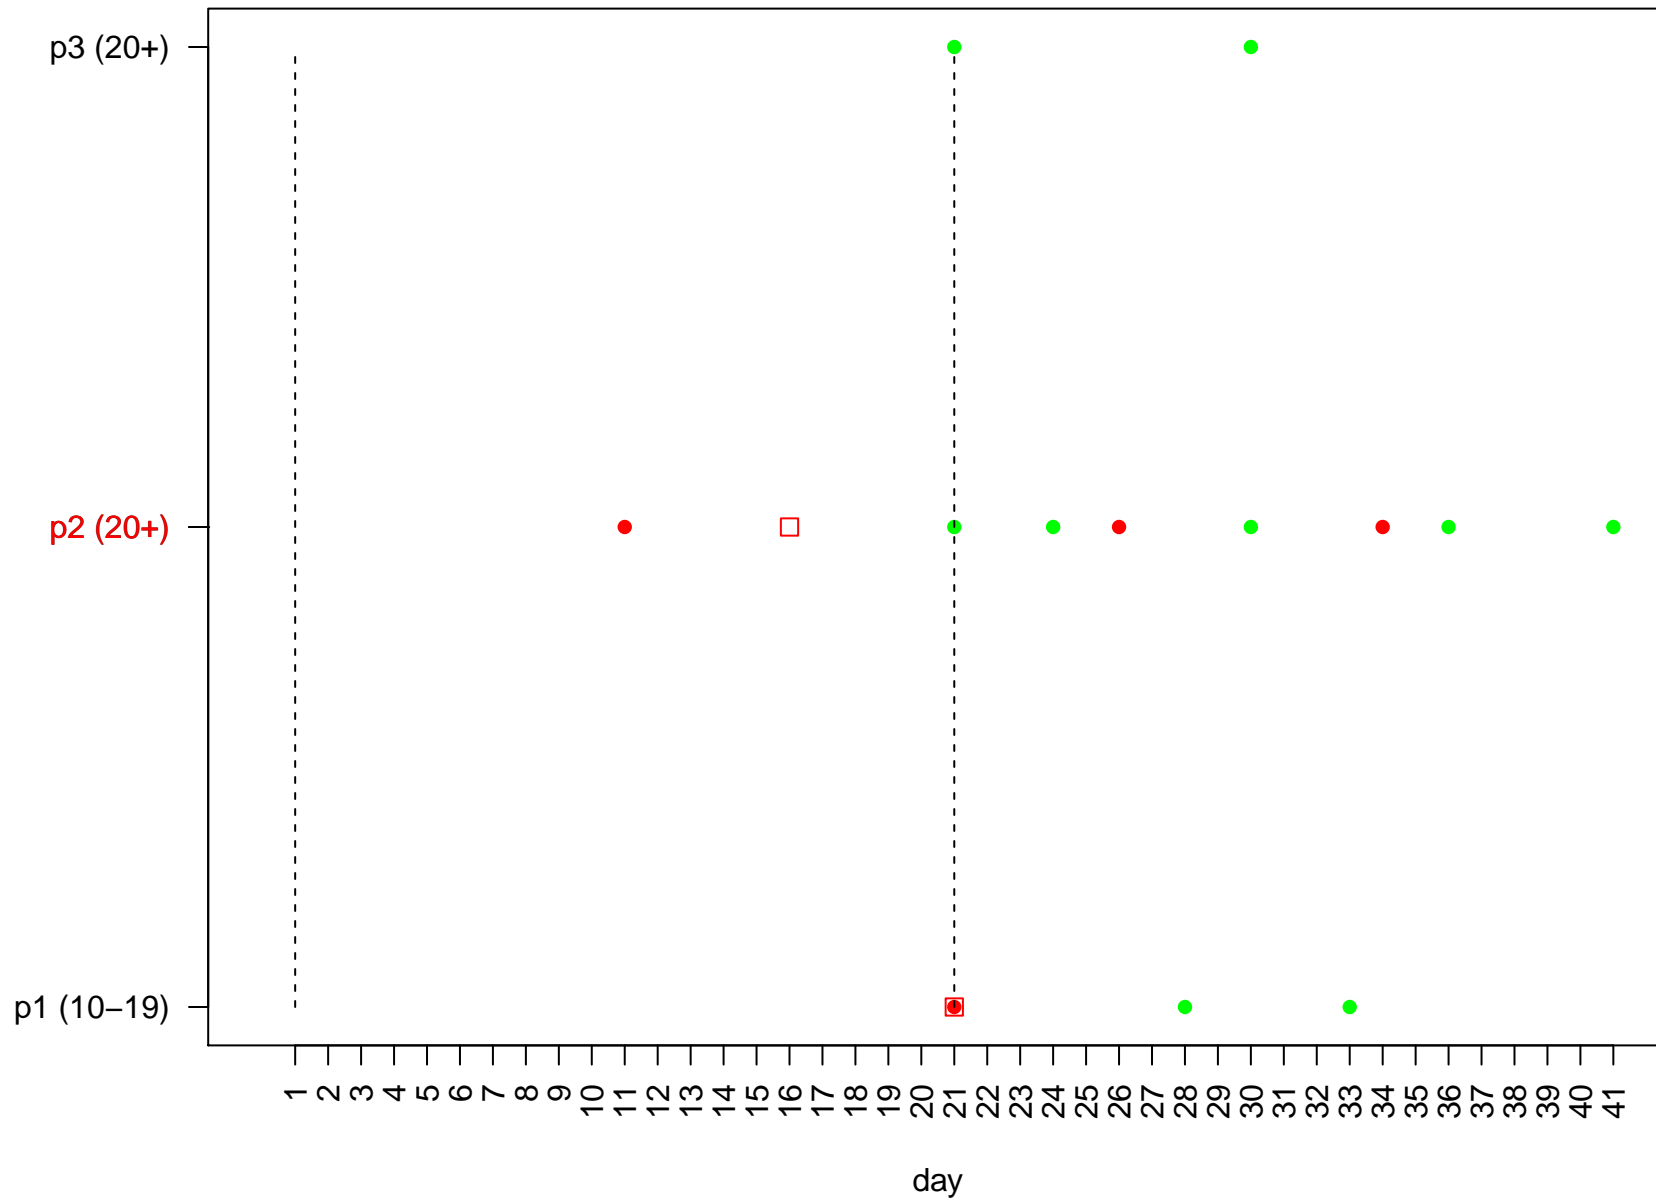

# Household 372

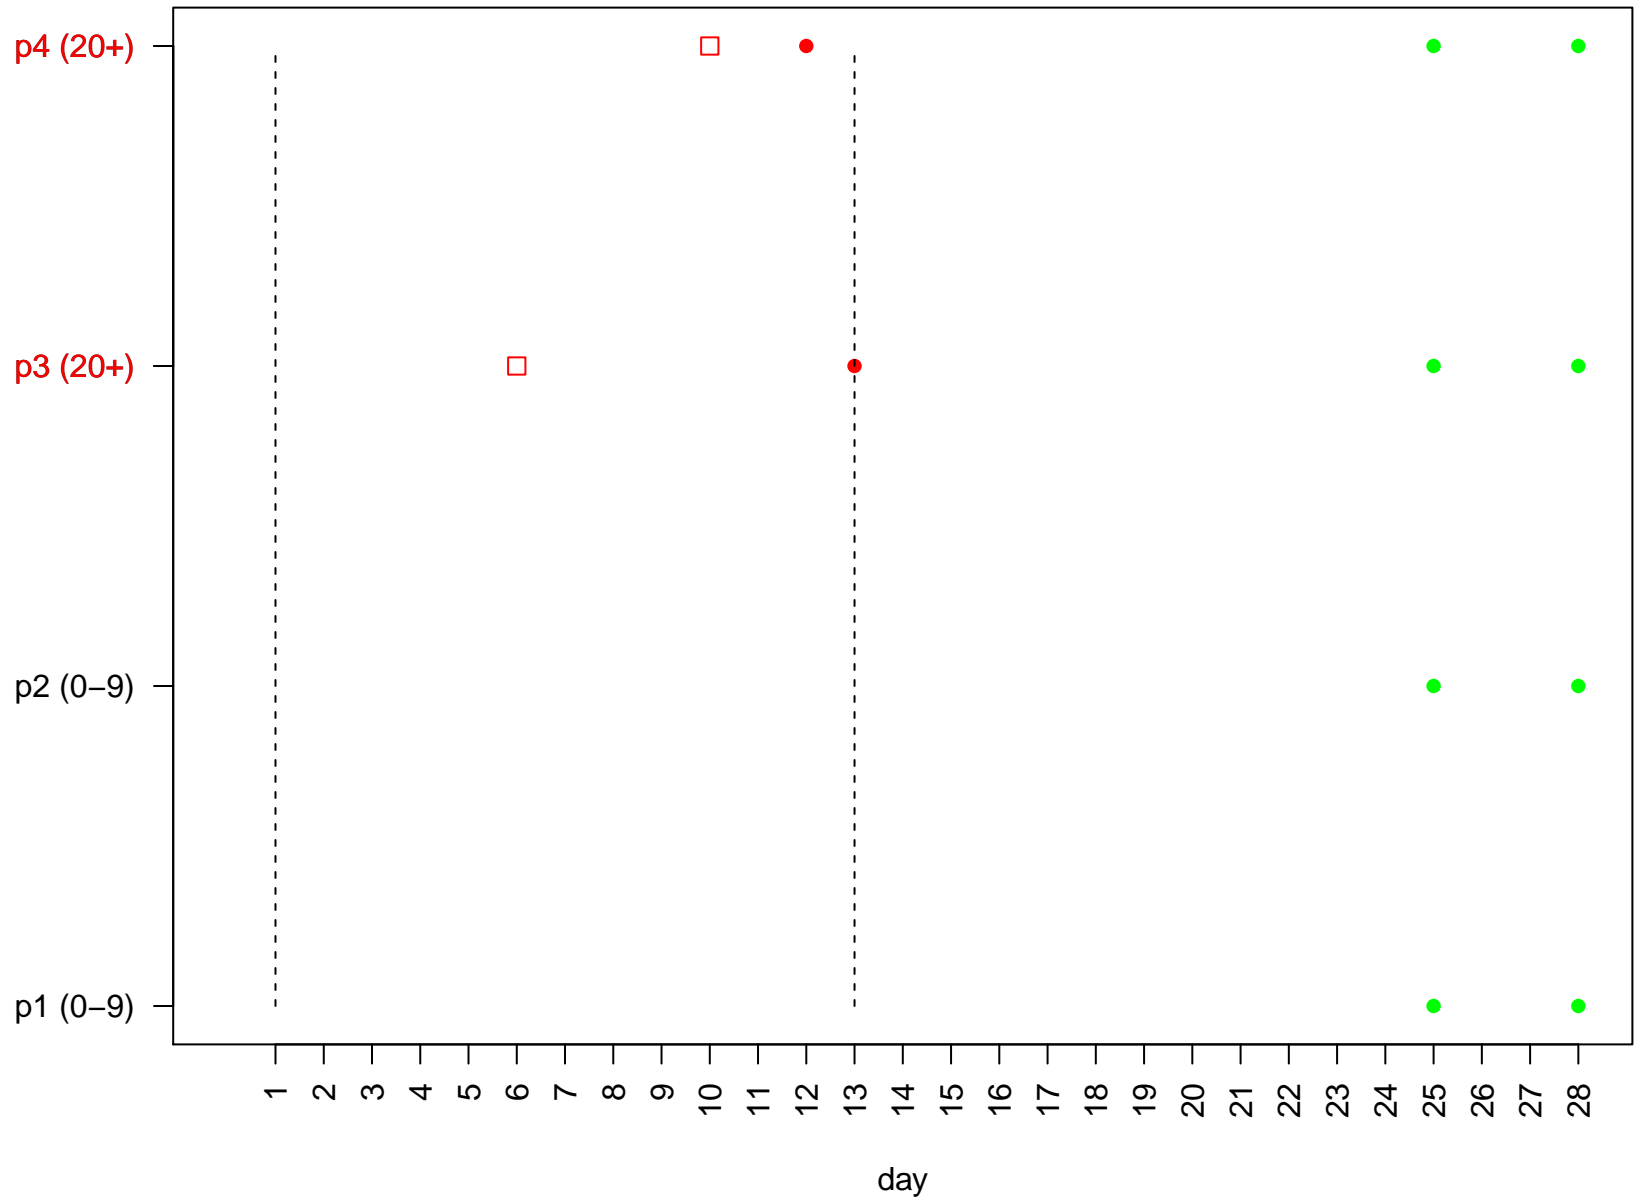

# Household 373

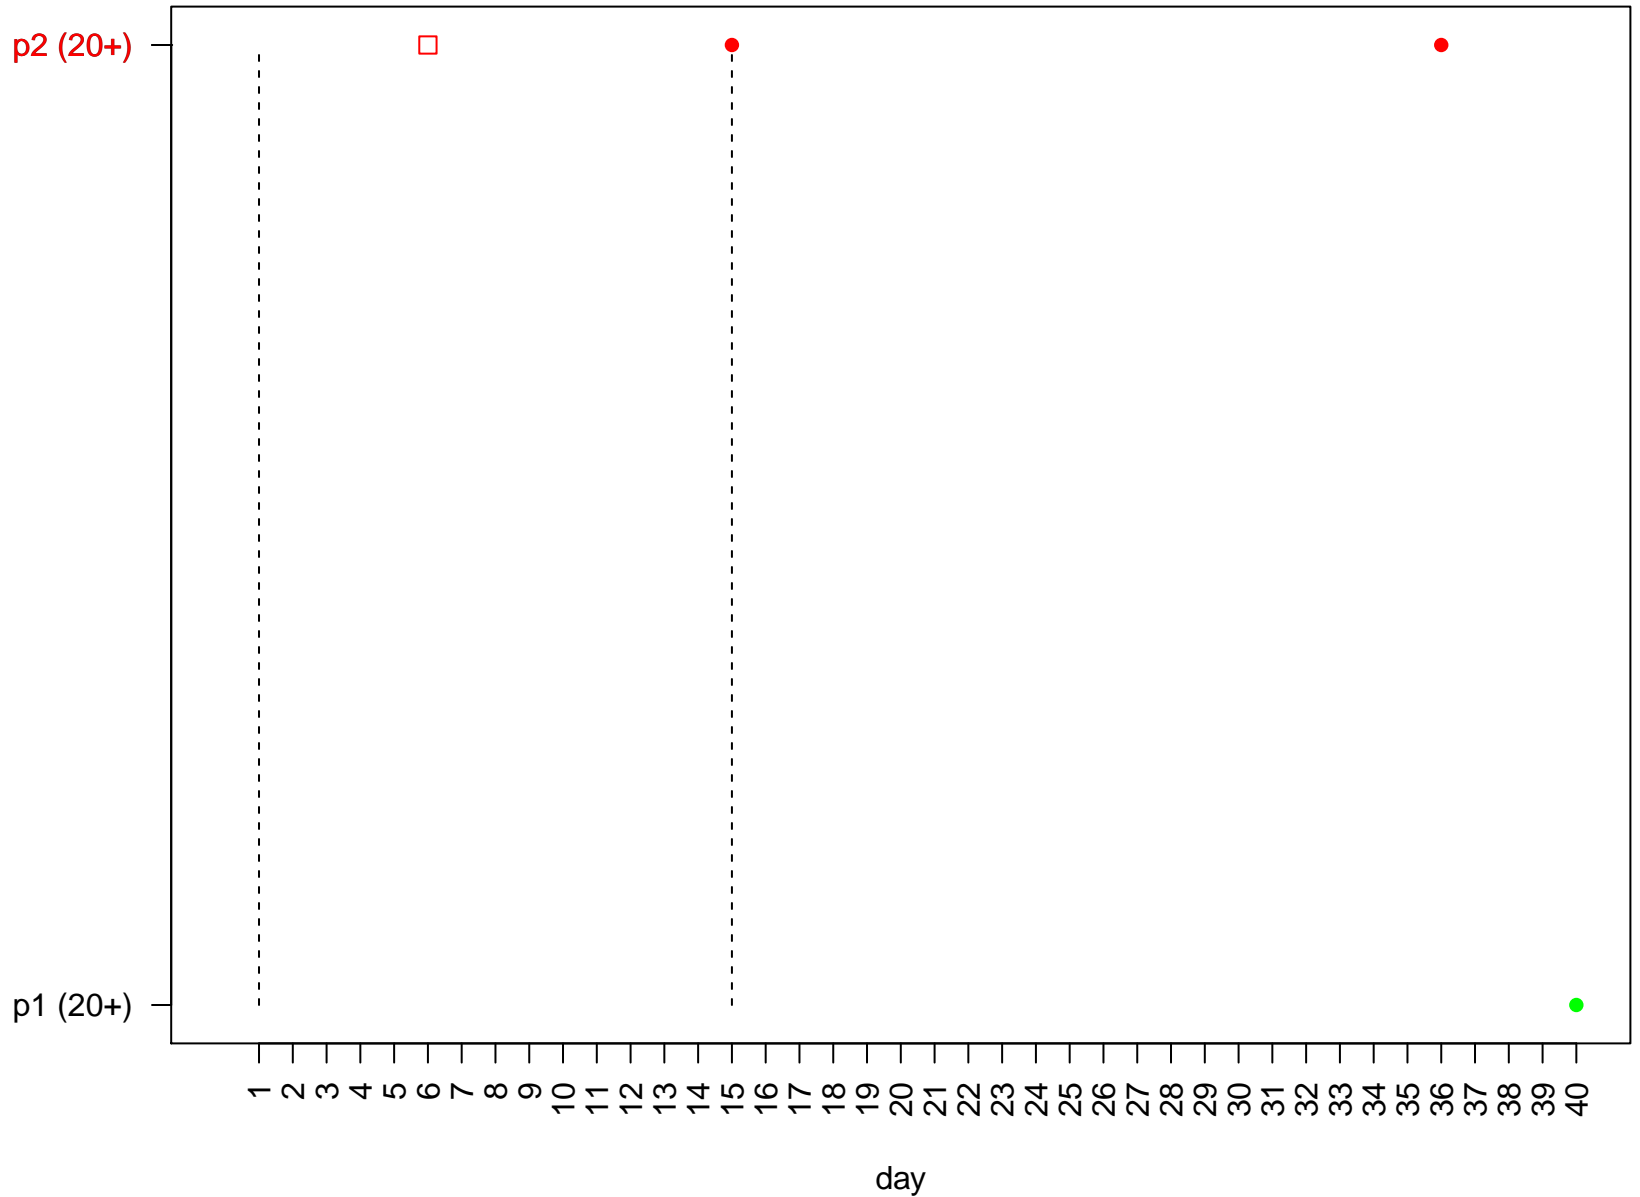

# Household 374

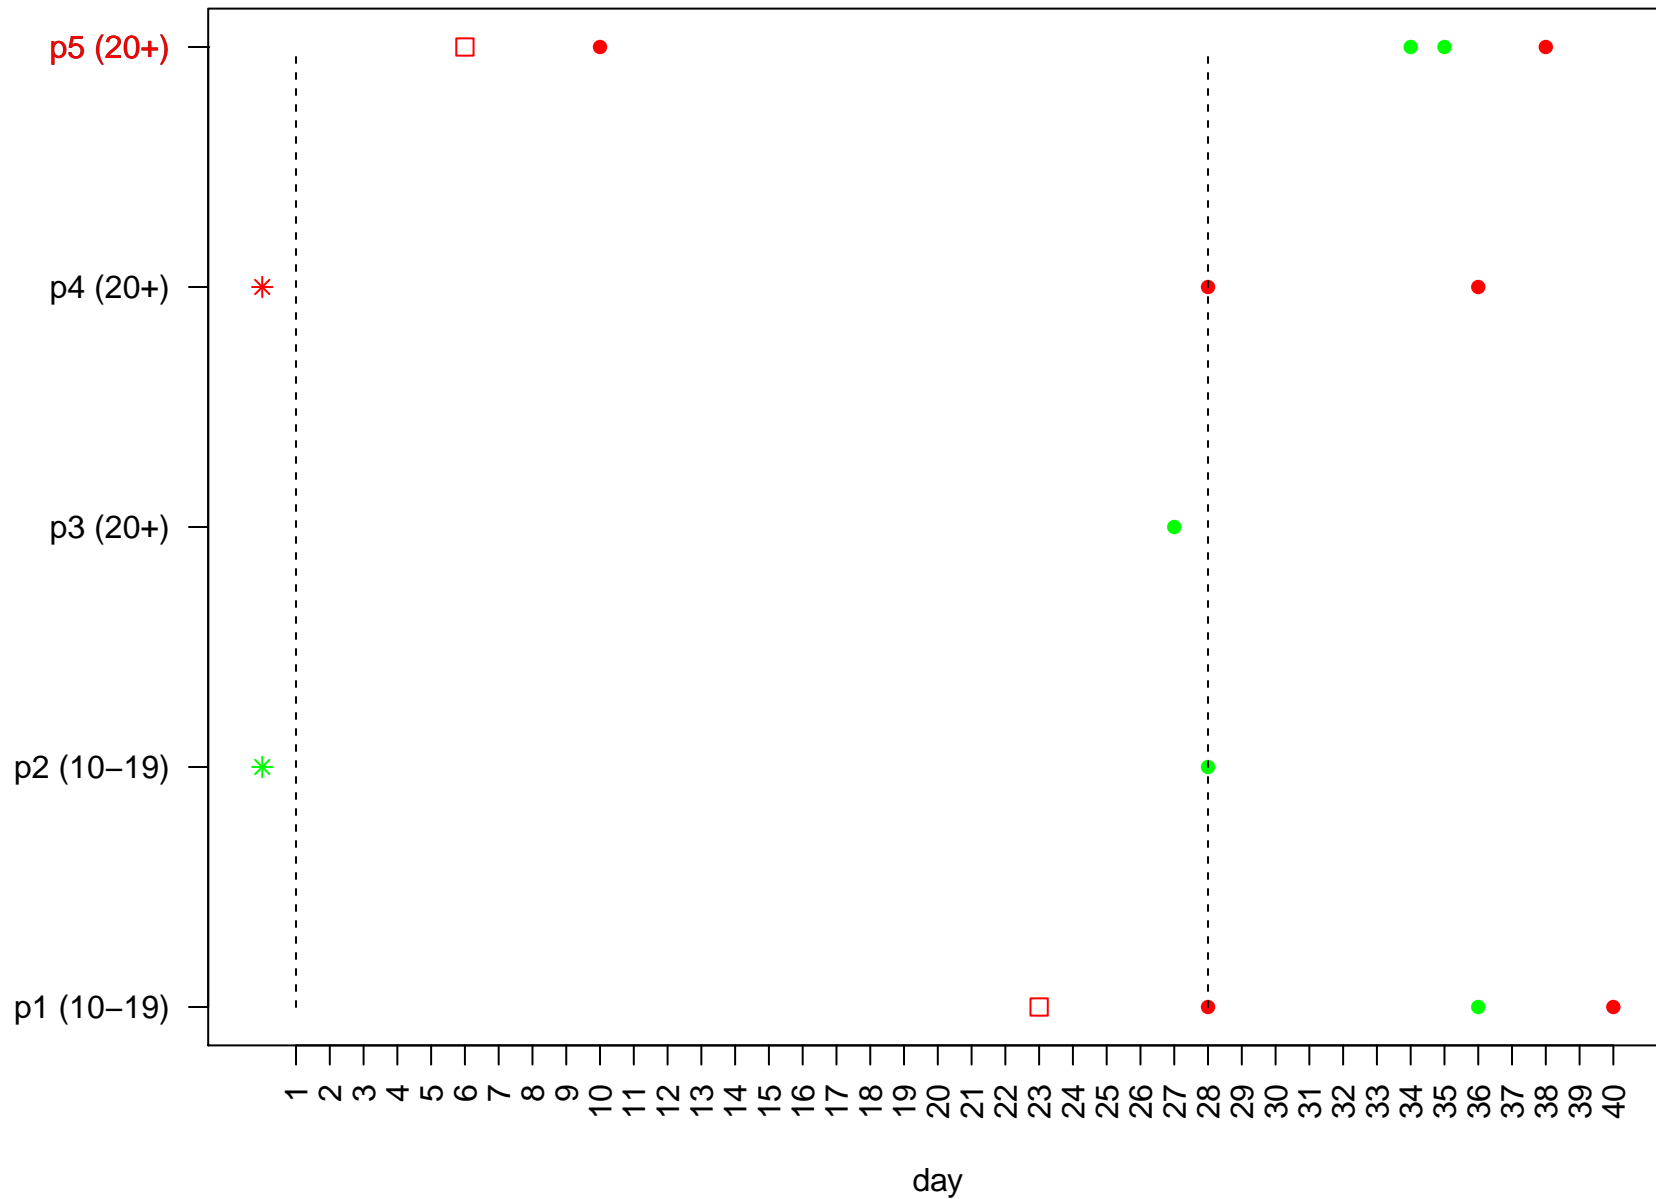

# Household 375

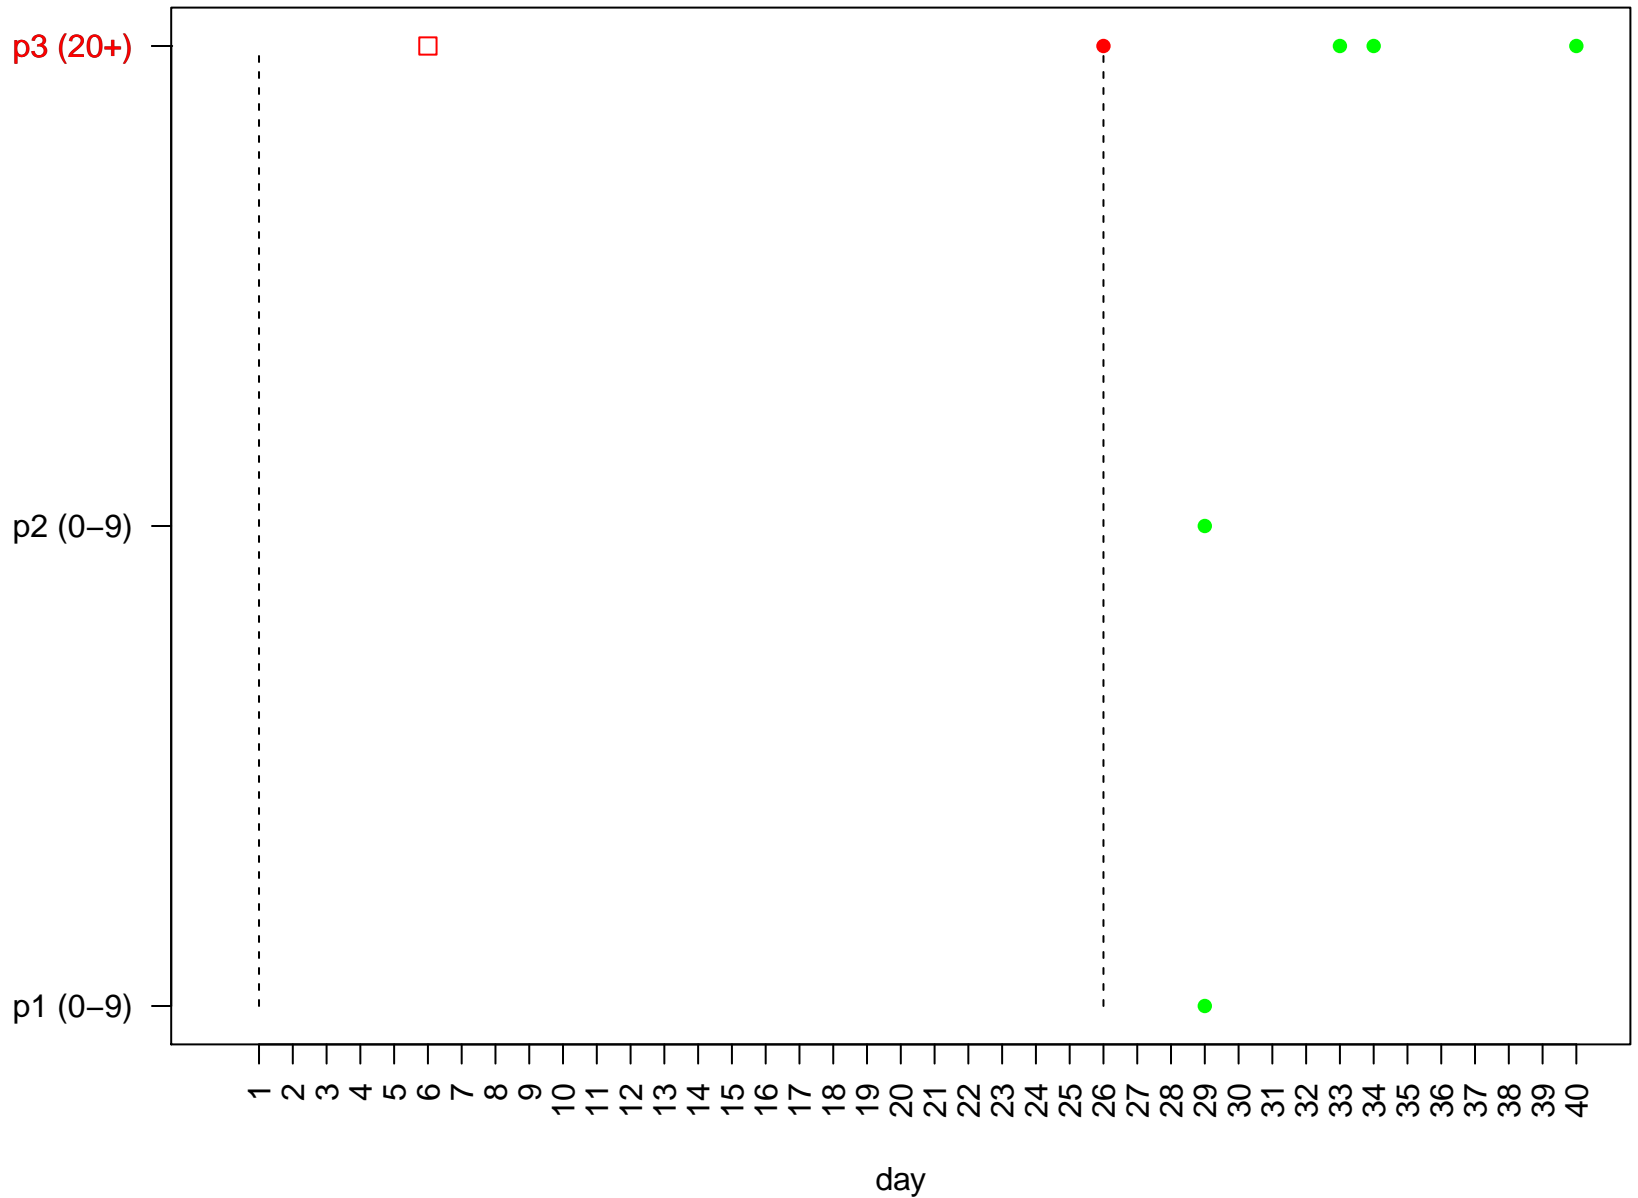

# Household 376

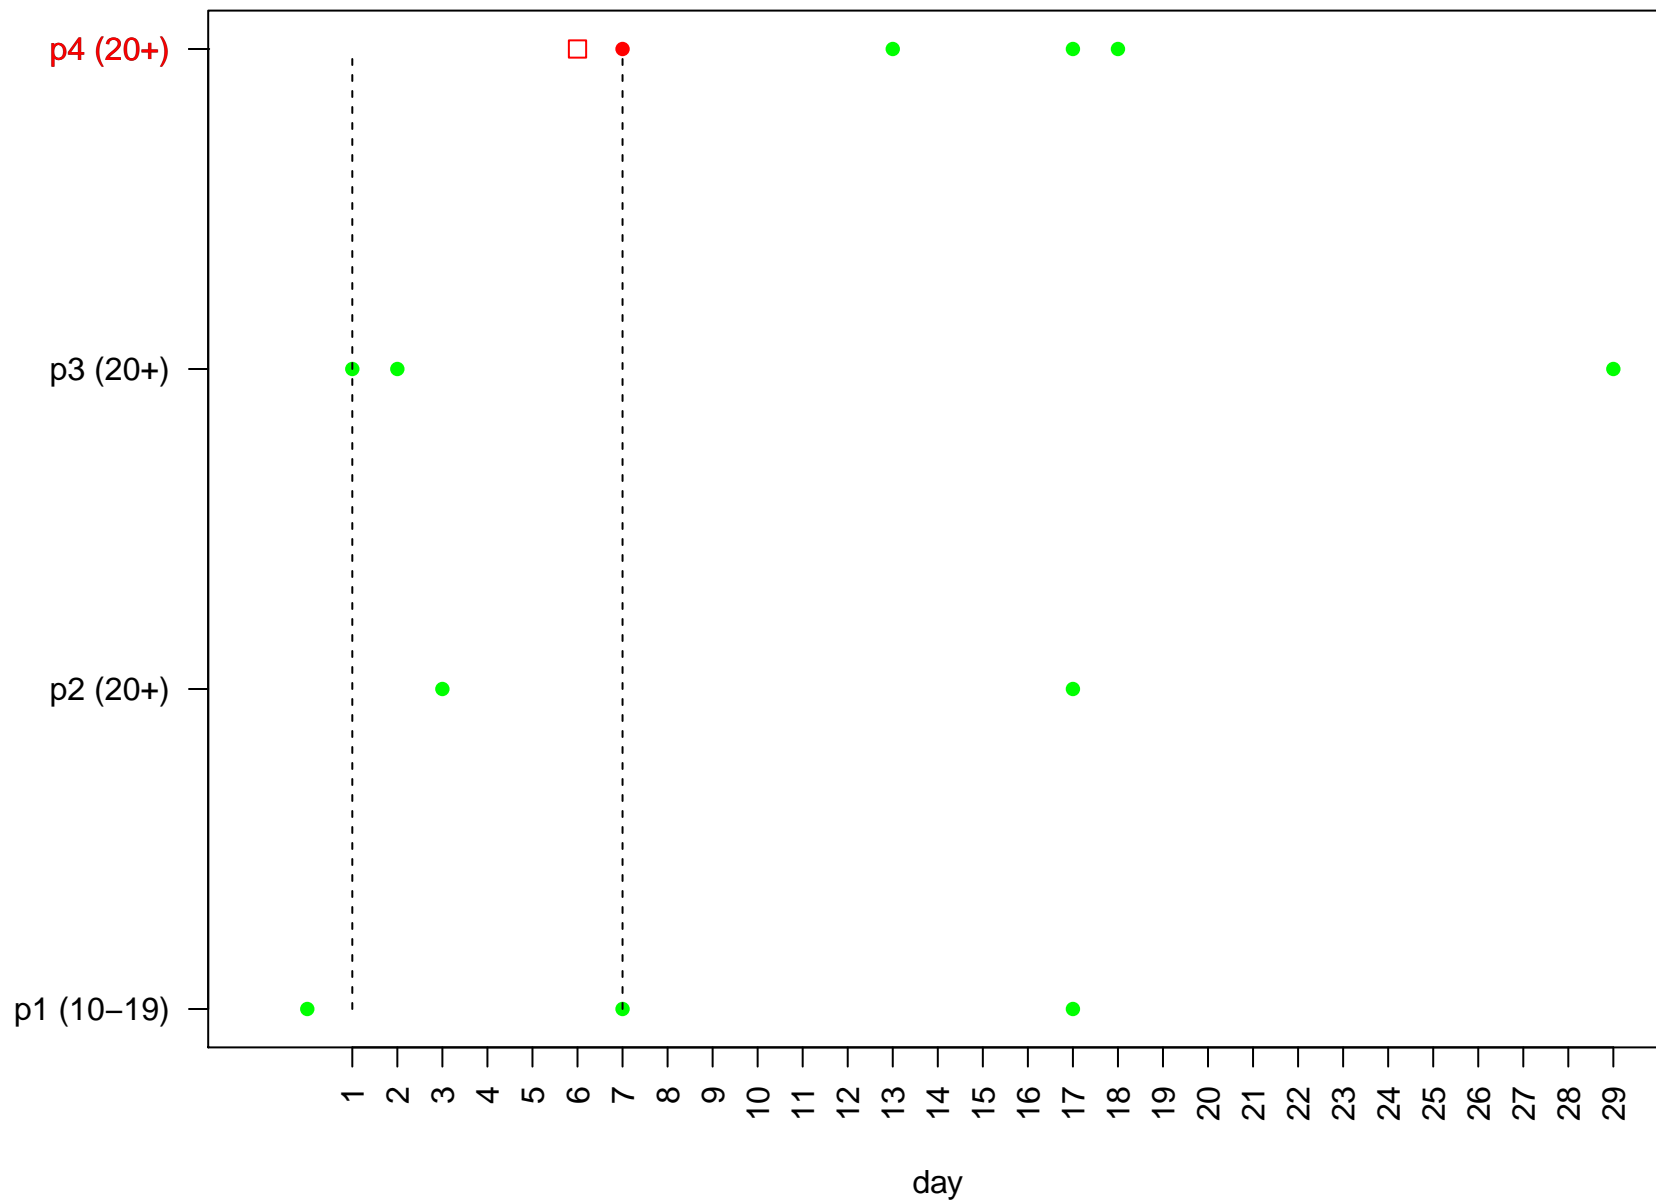

# Household 377

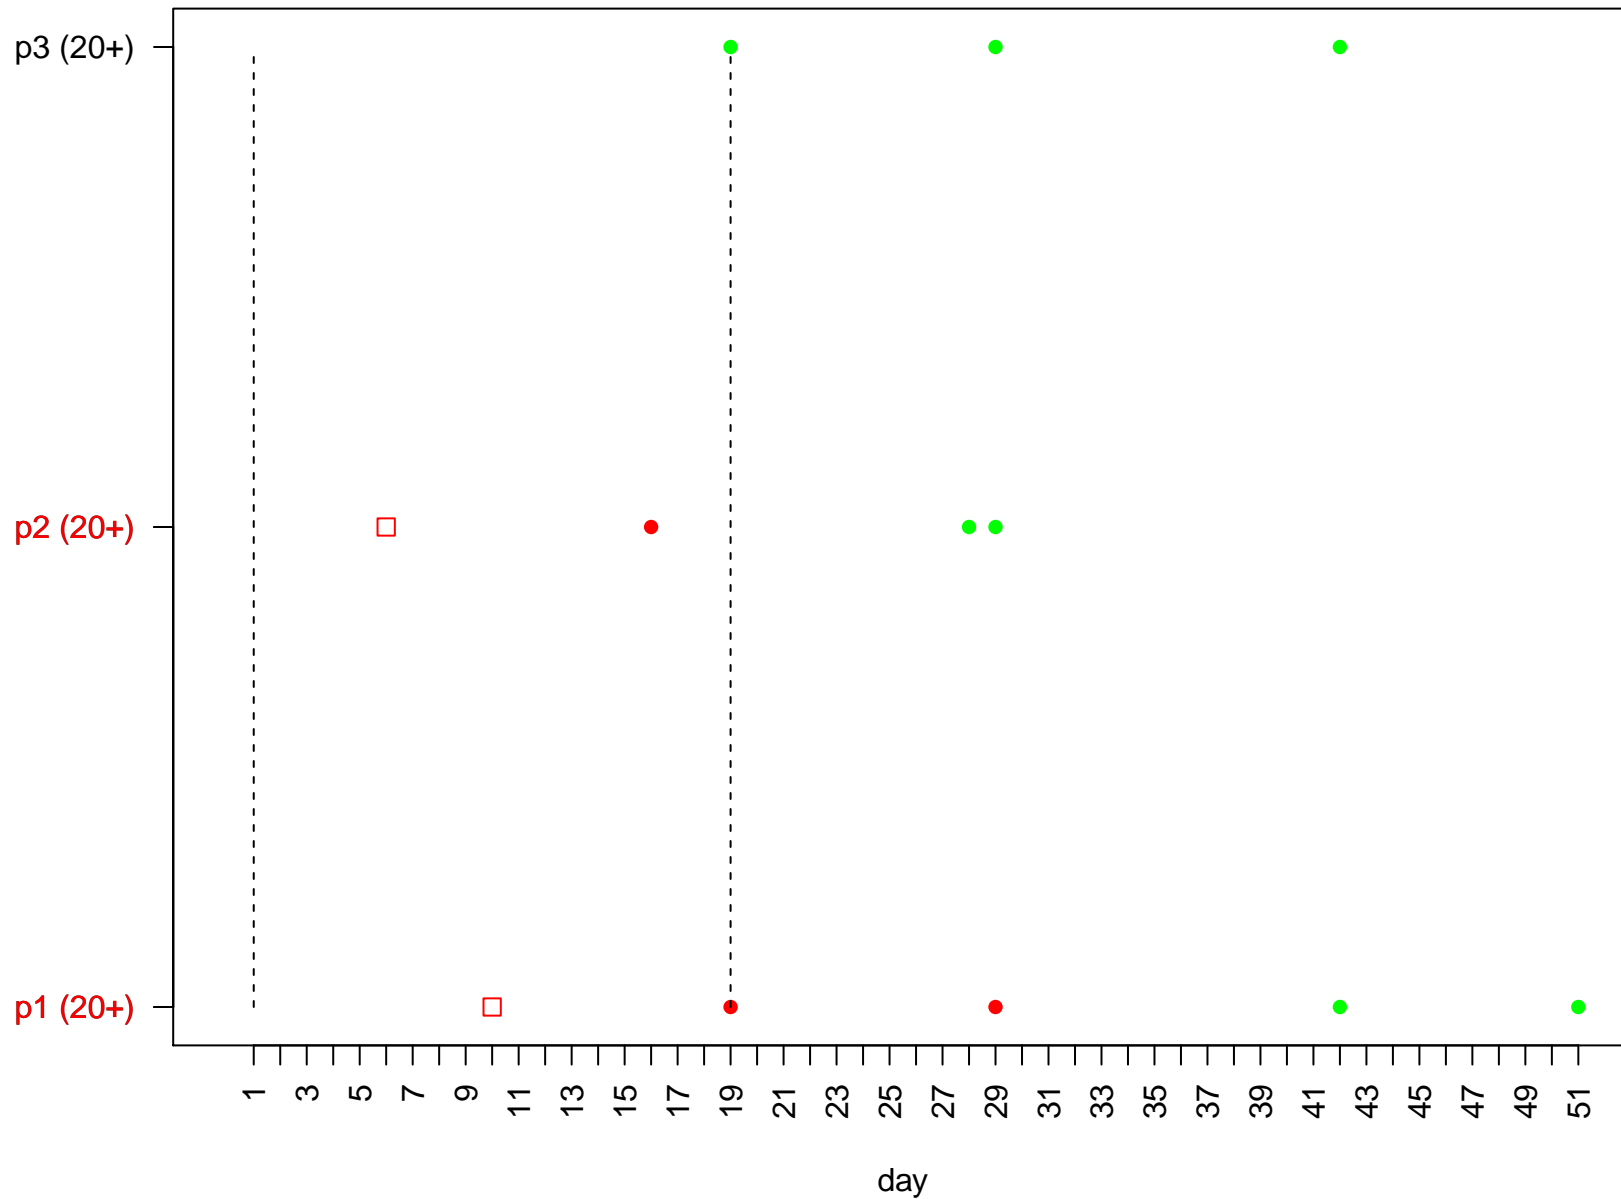

# Household 378

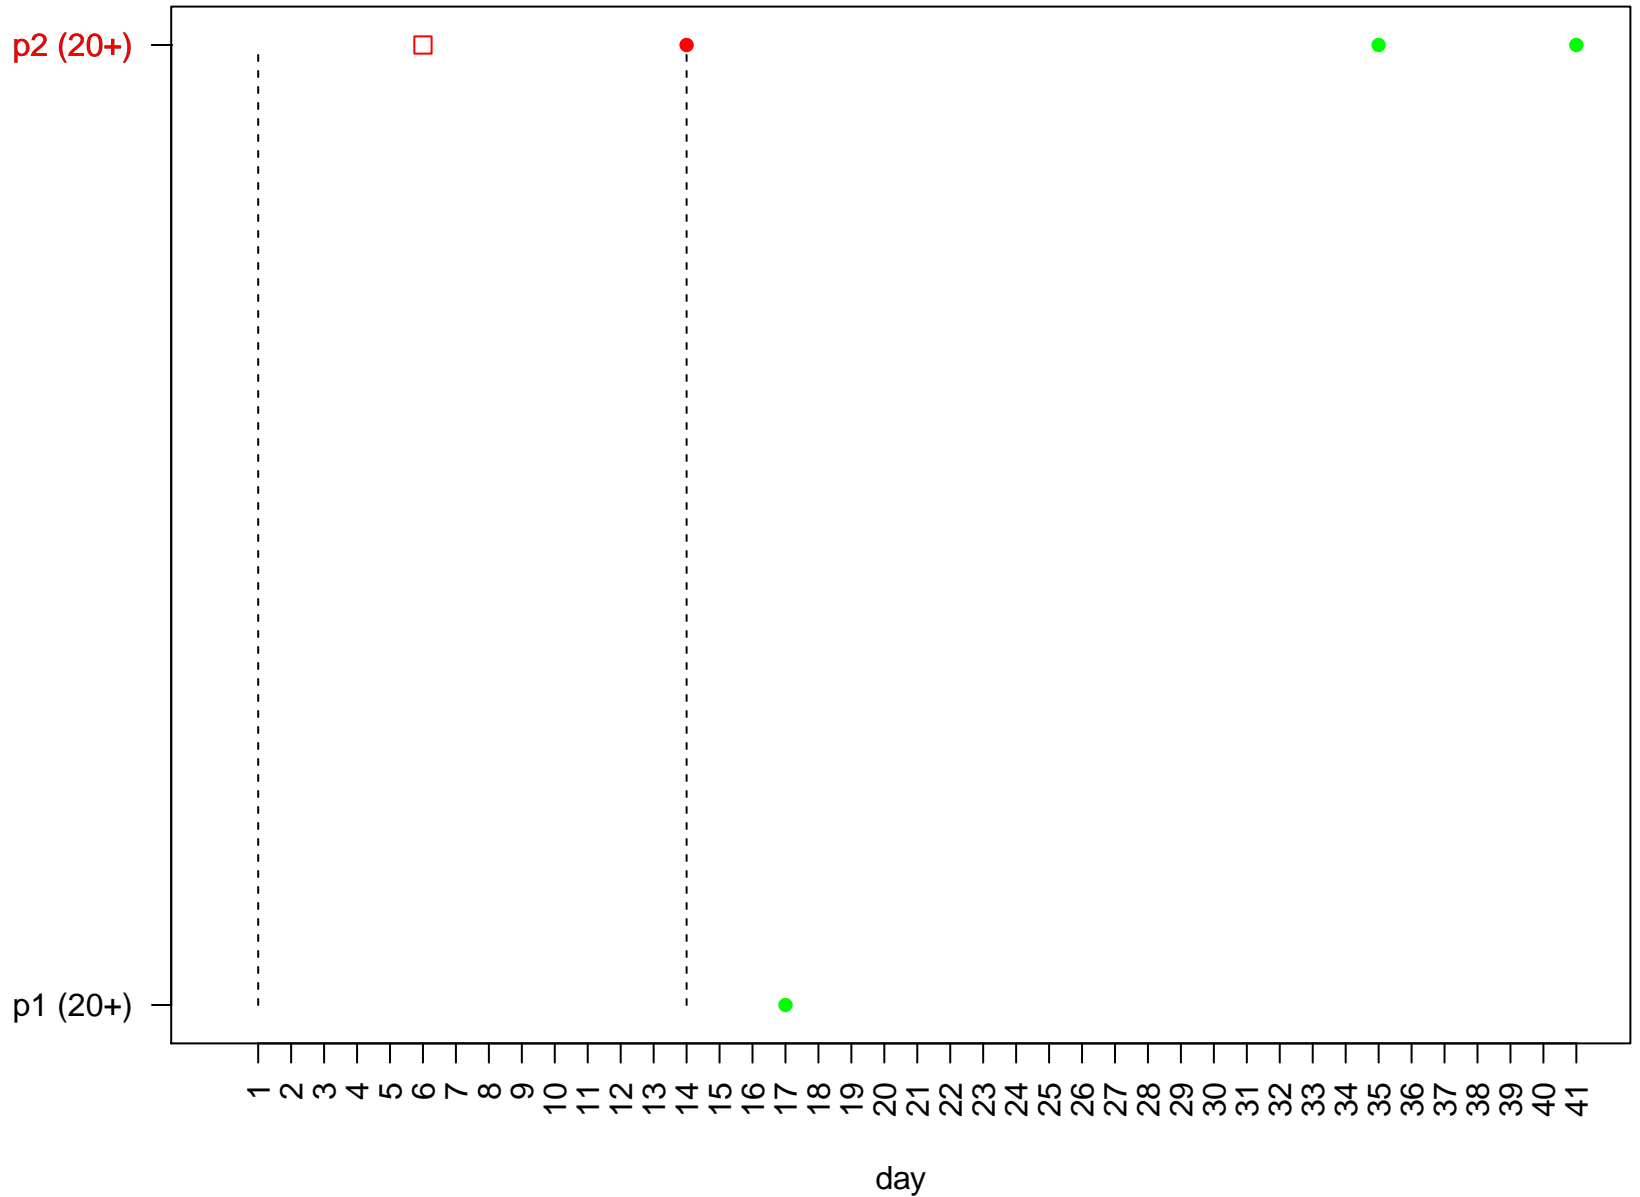



# Household 379

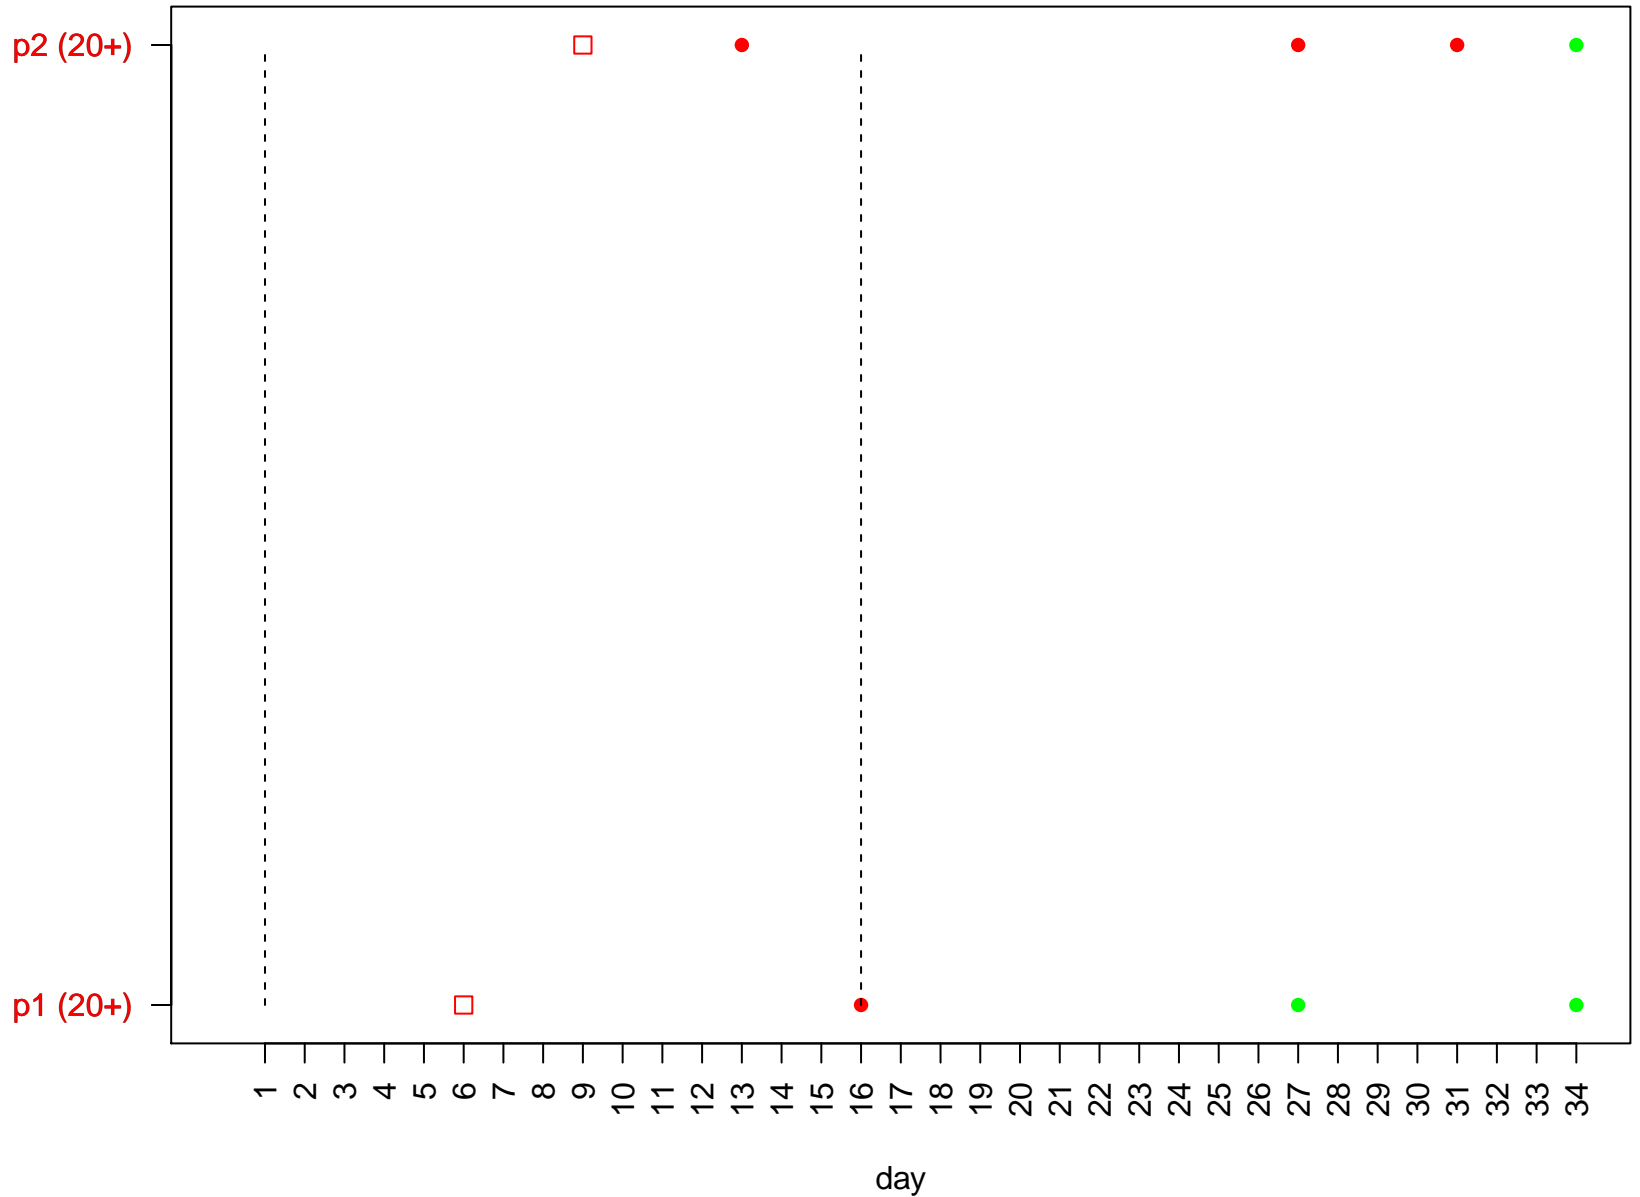

# Household 380

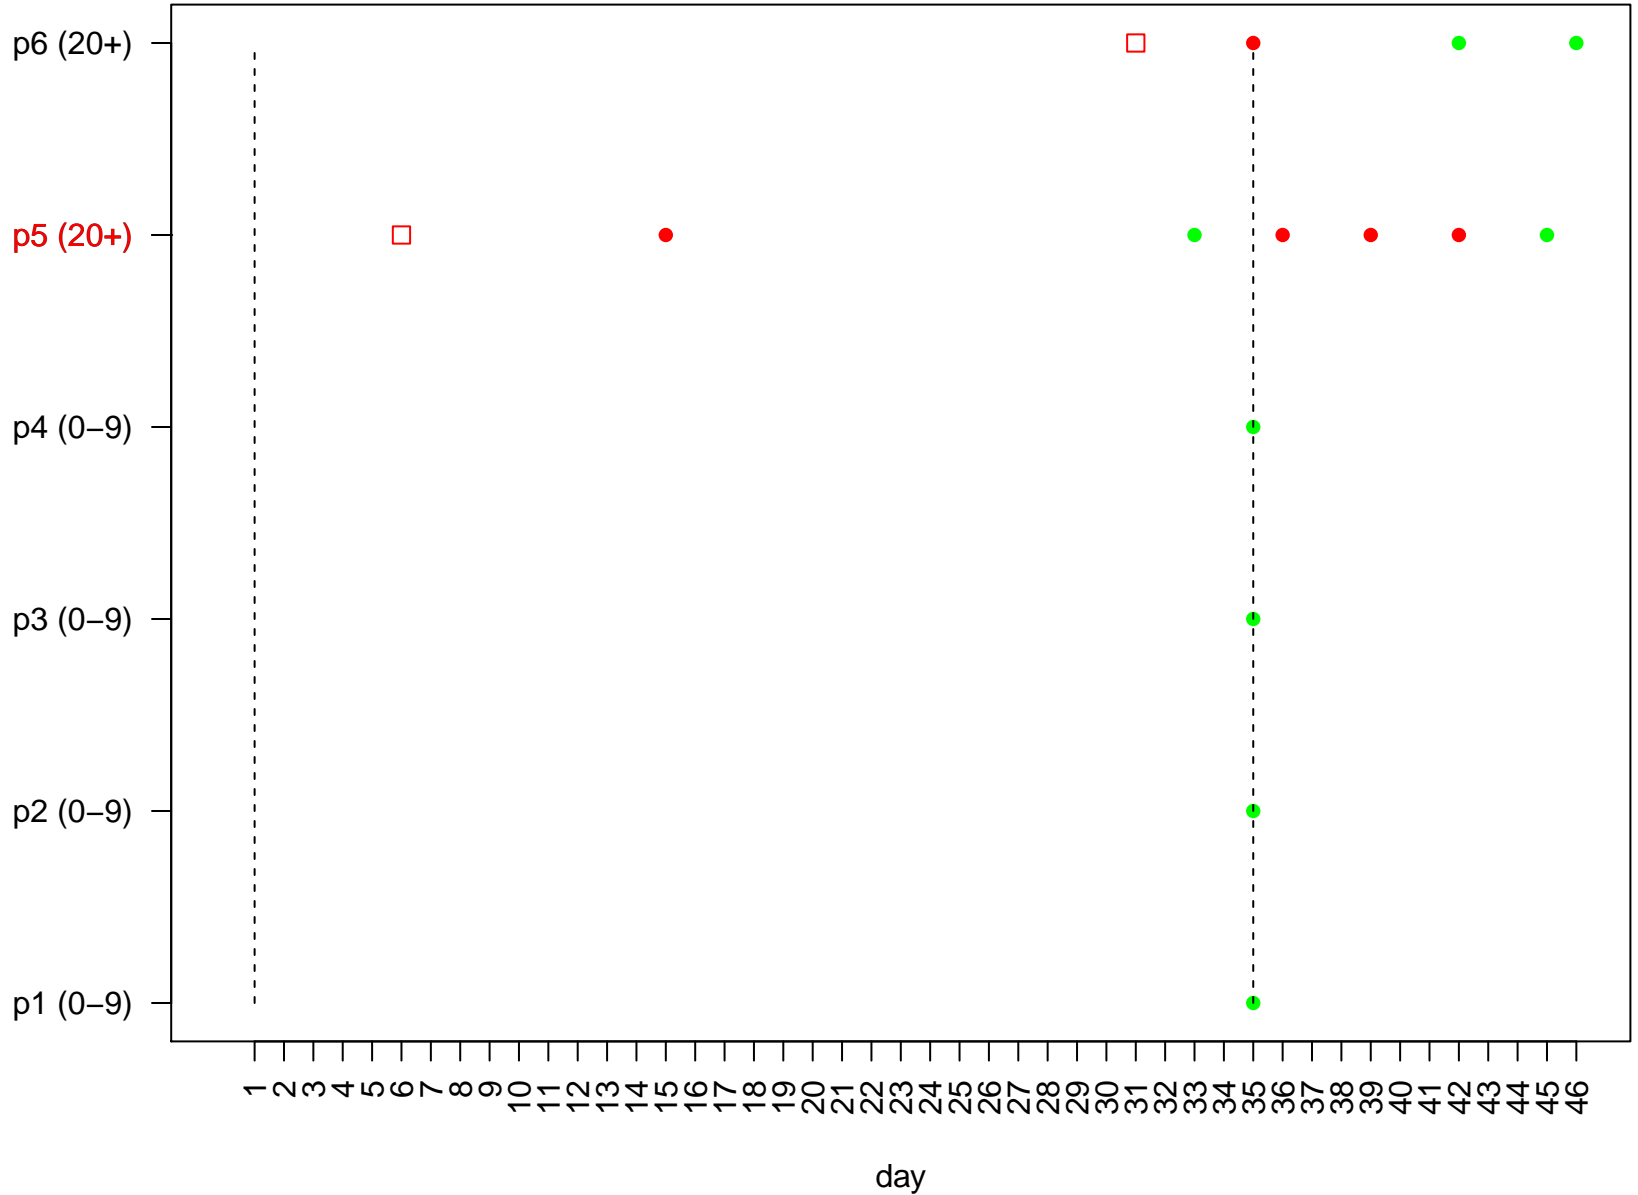

# Household 381

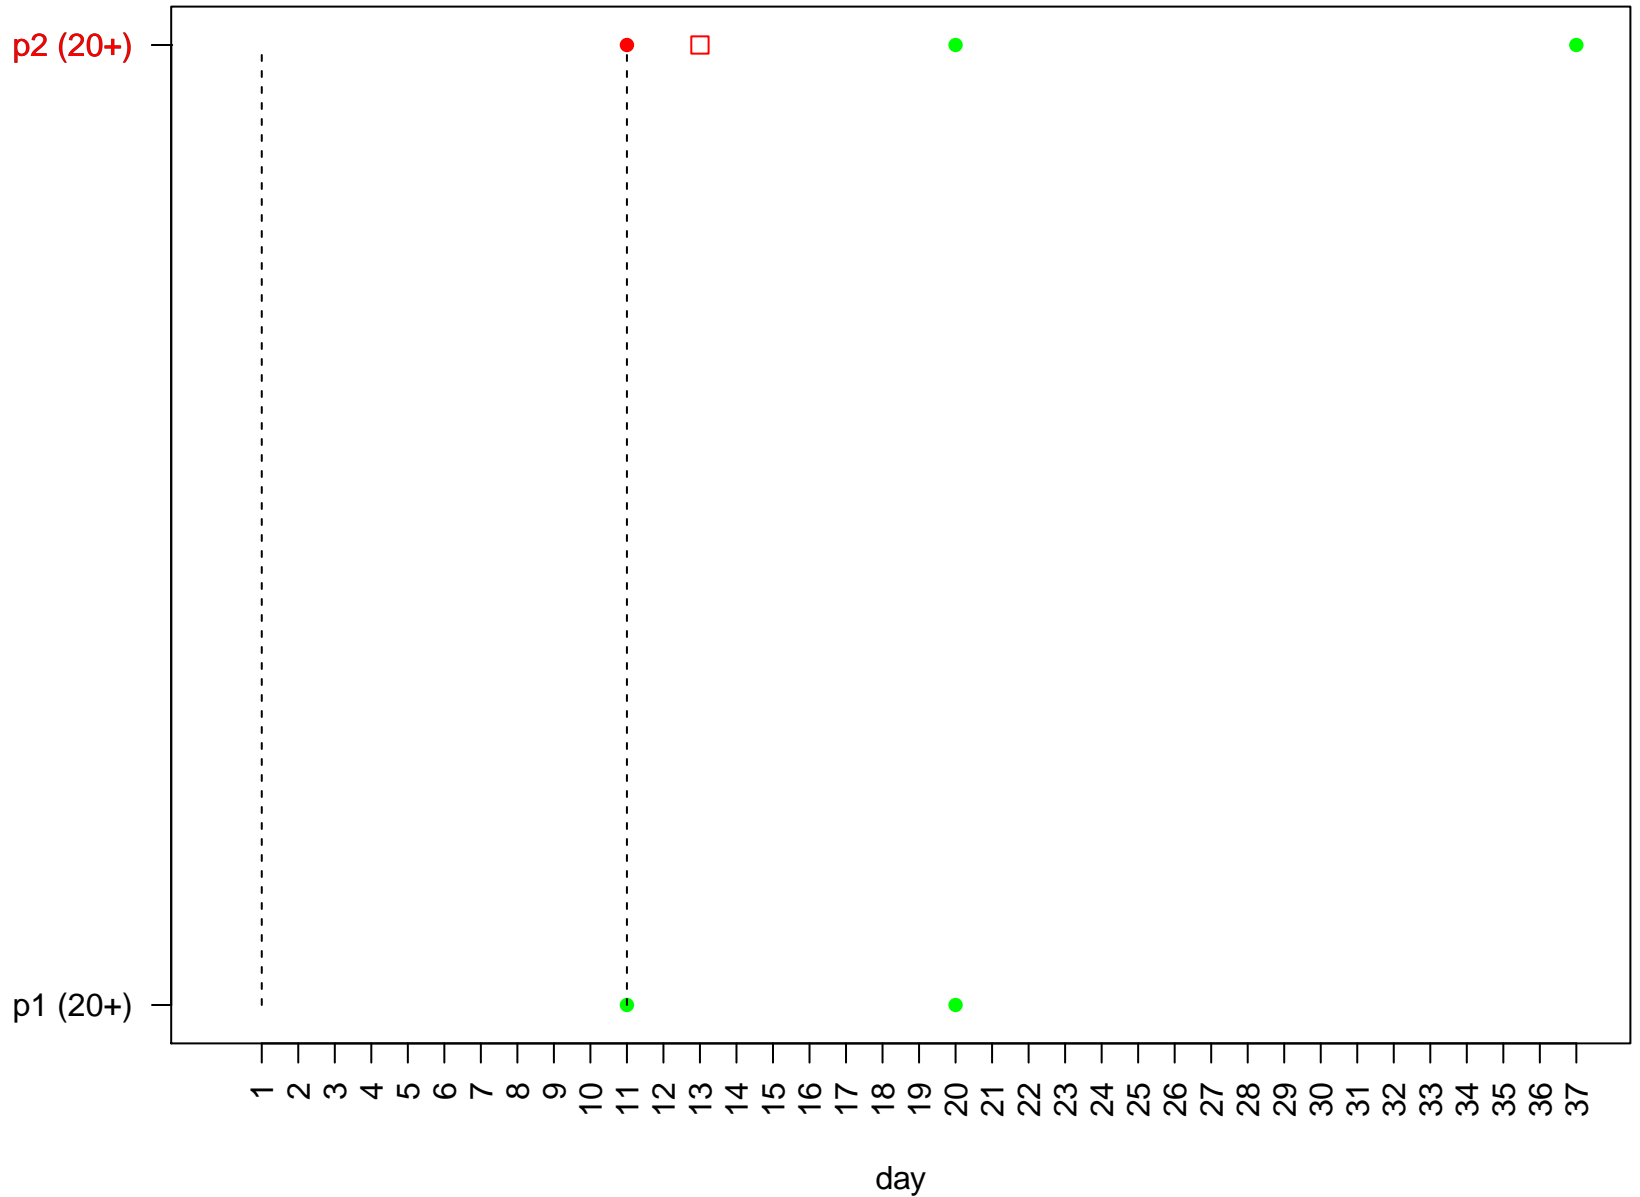

# Household 382

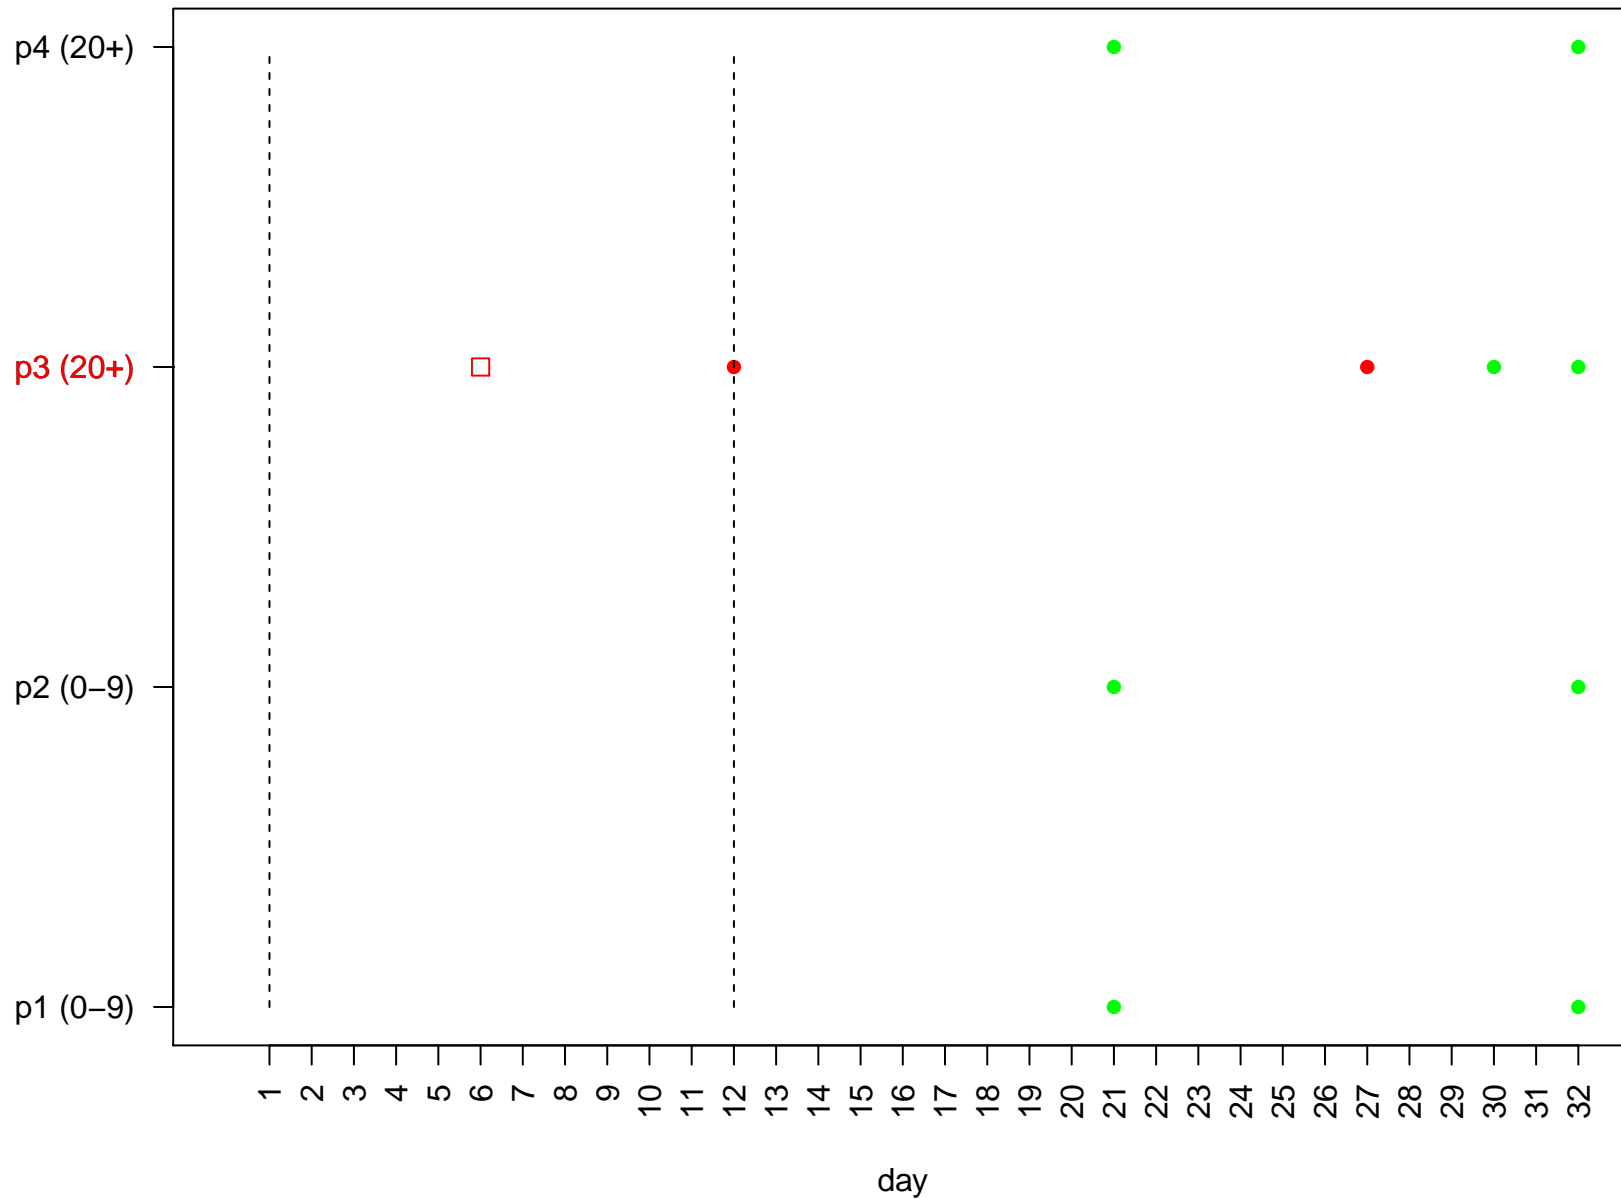

# Household 383

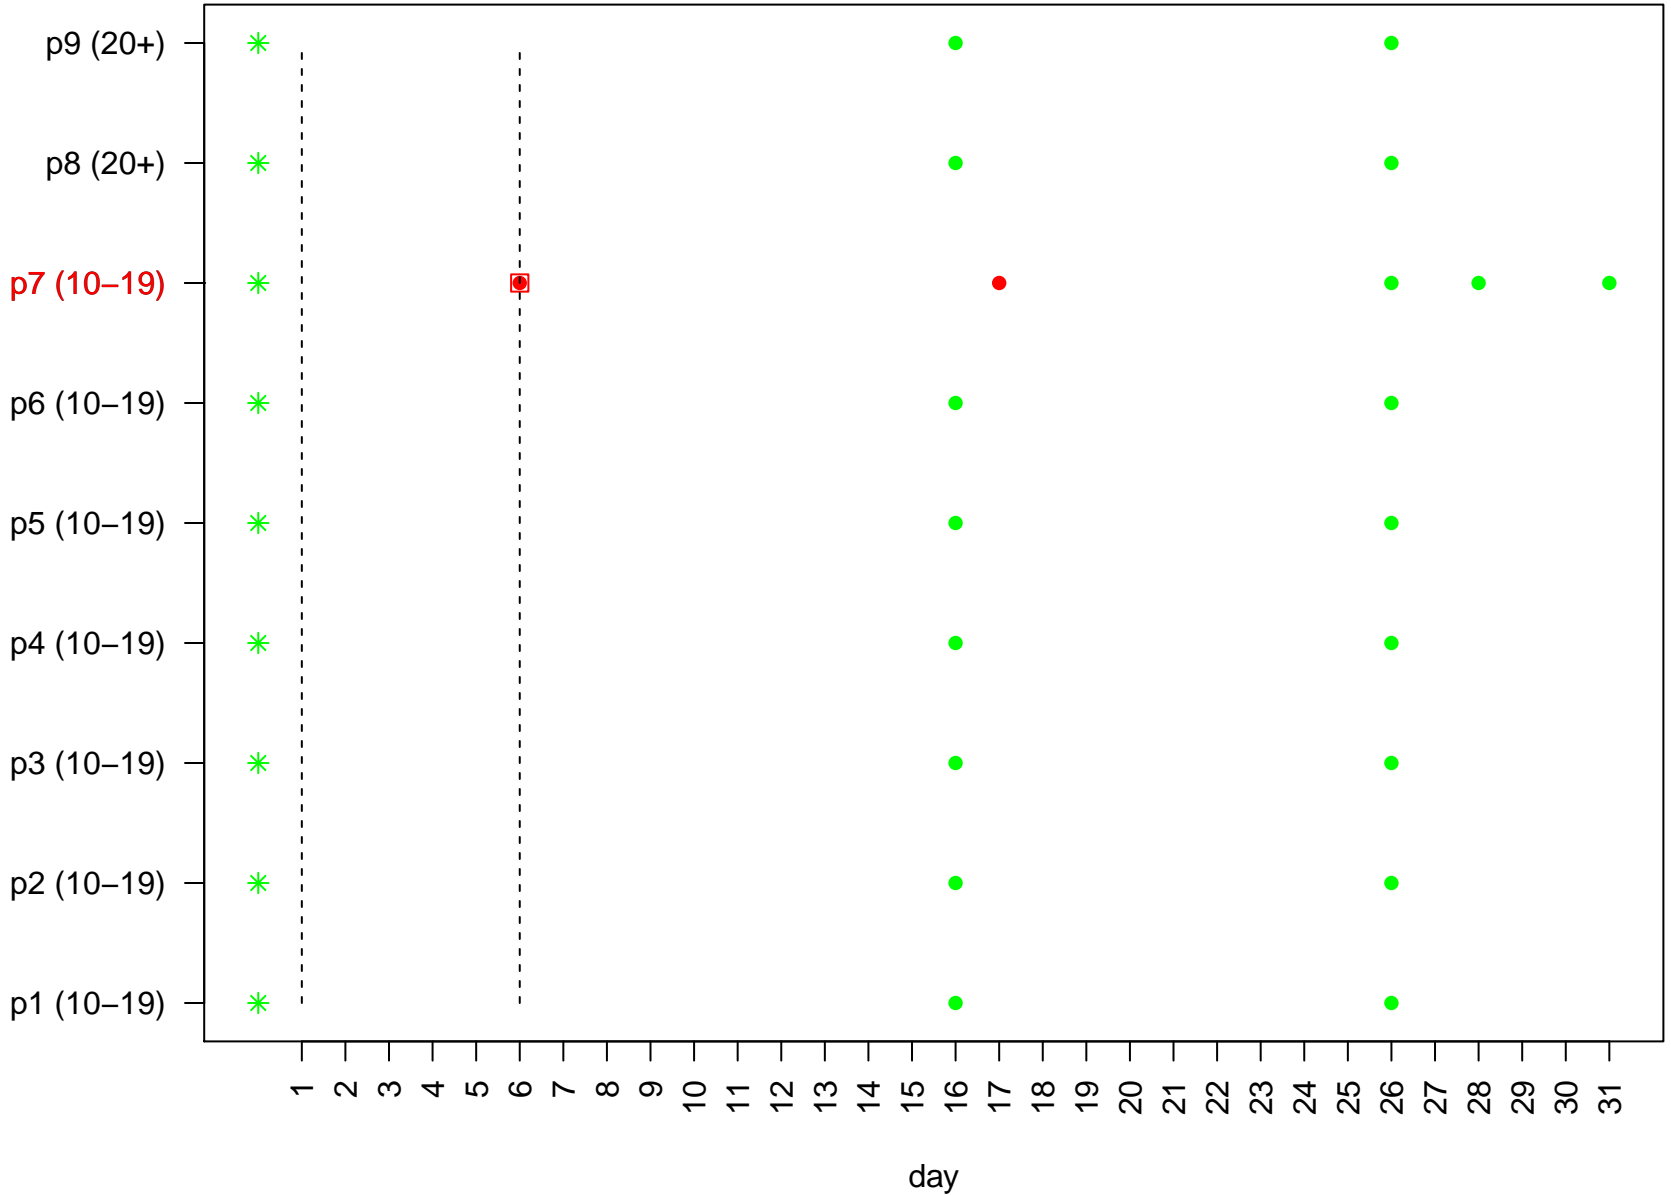

# Household 384

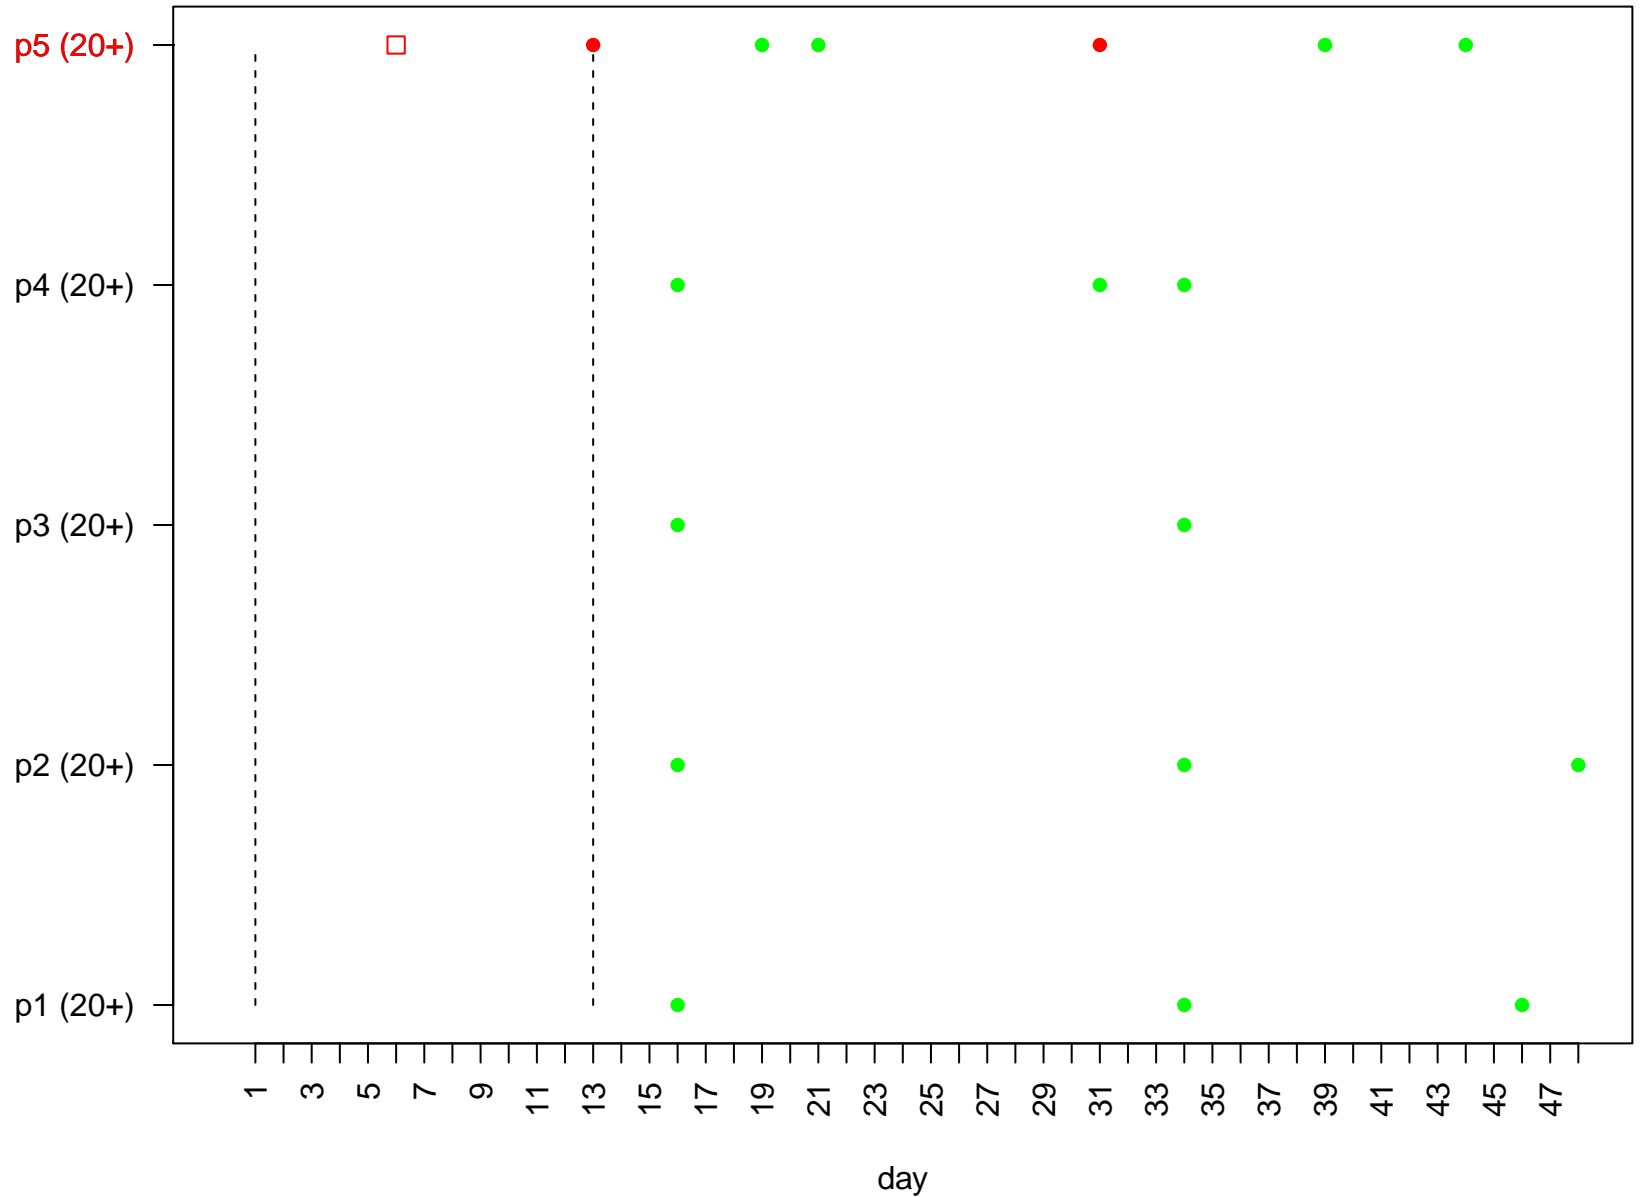

# Household 385

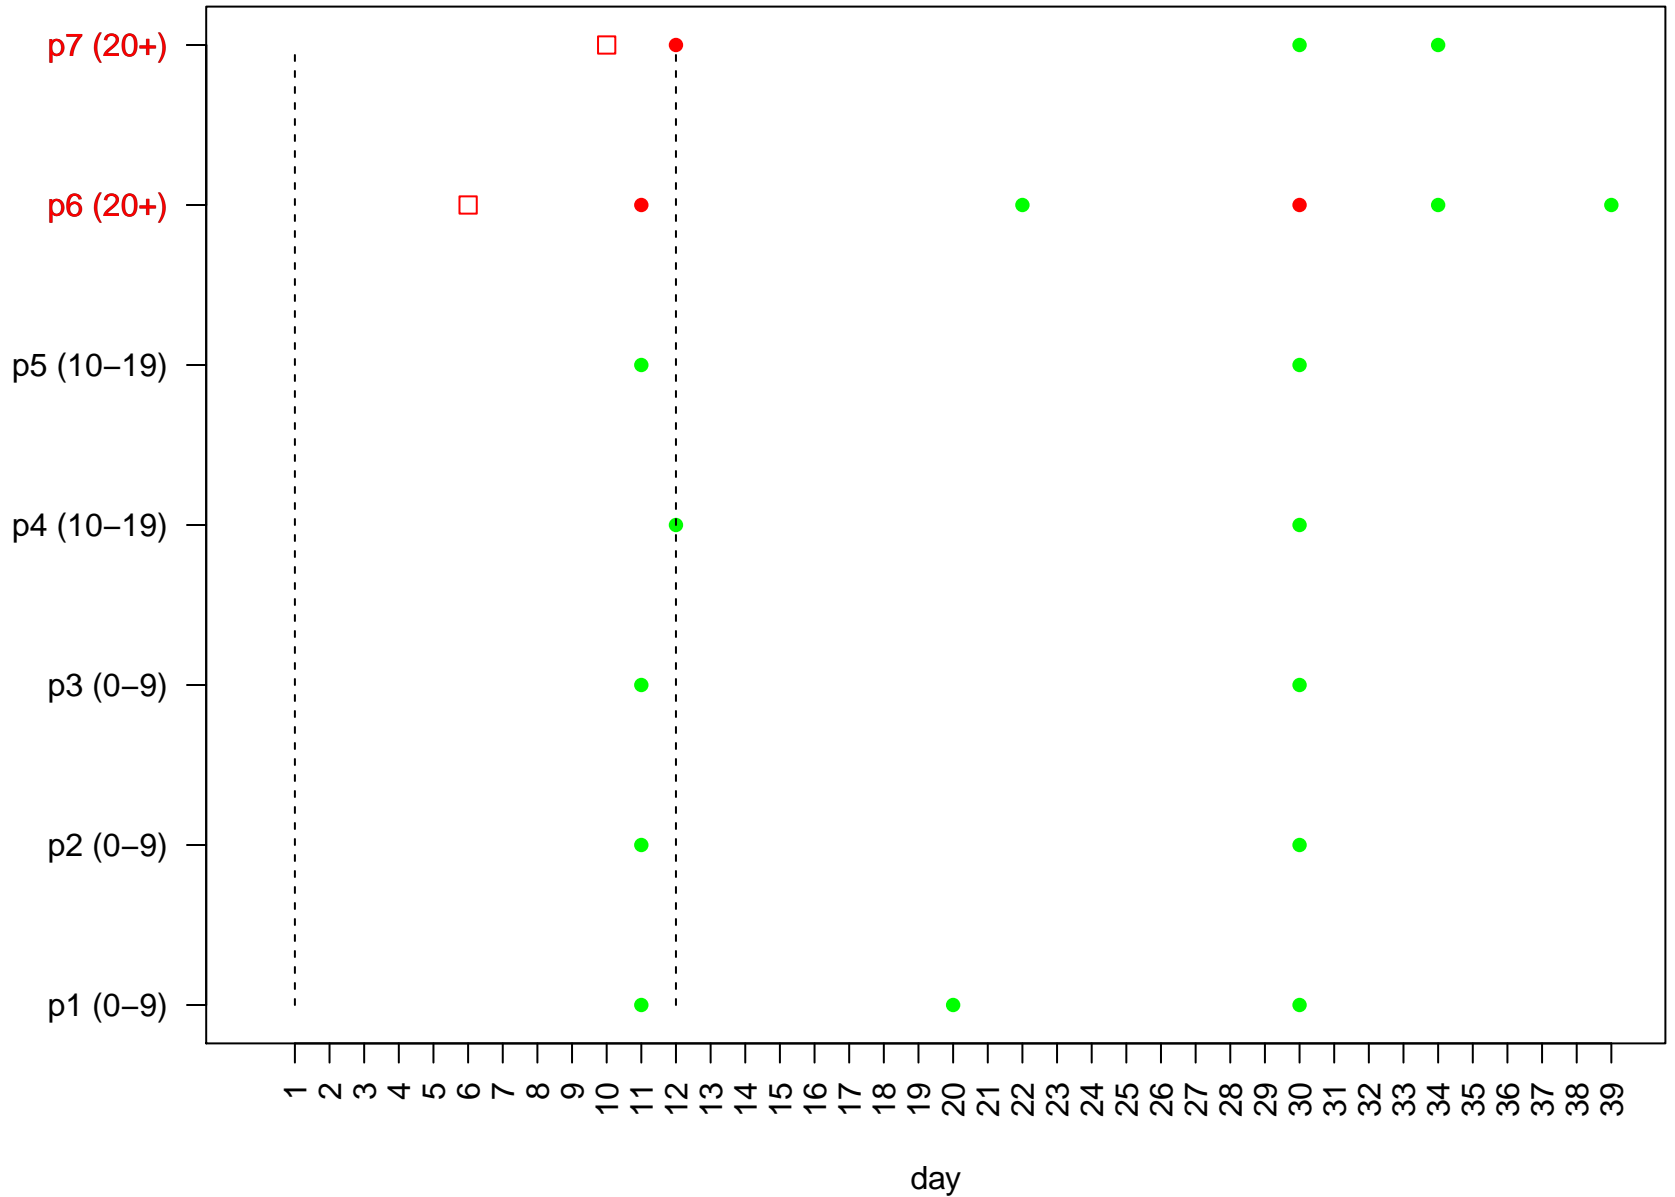

# Household 386

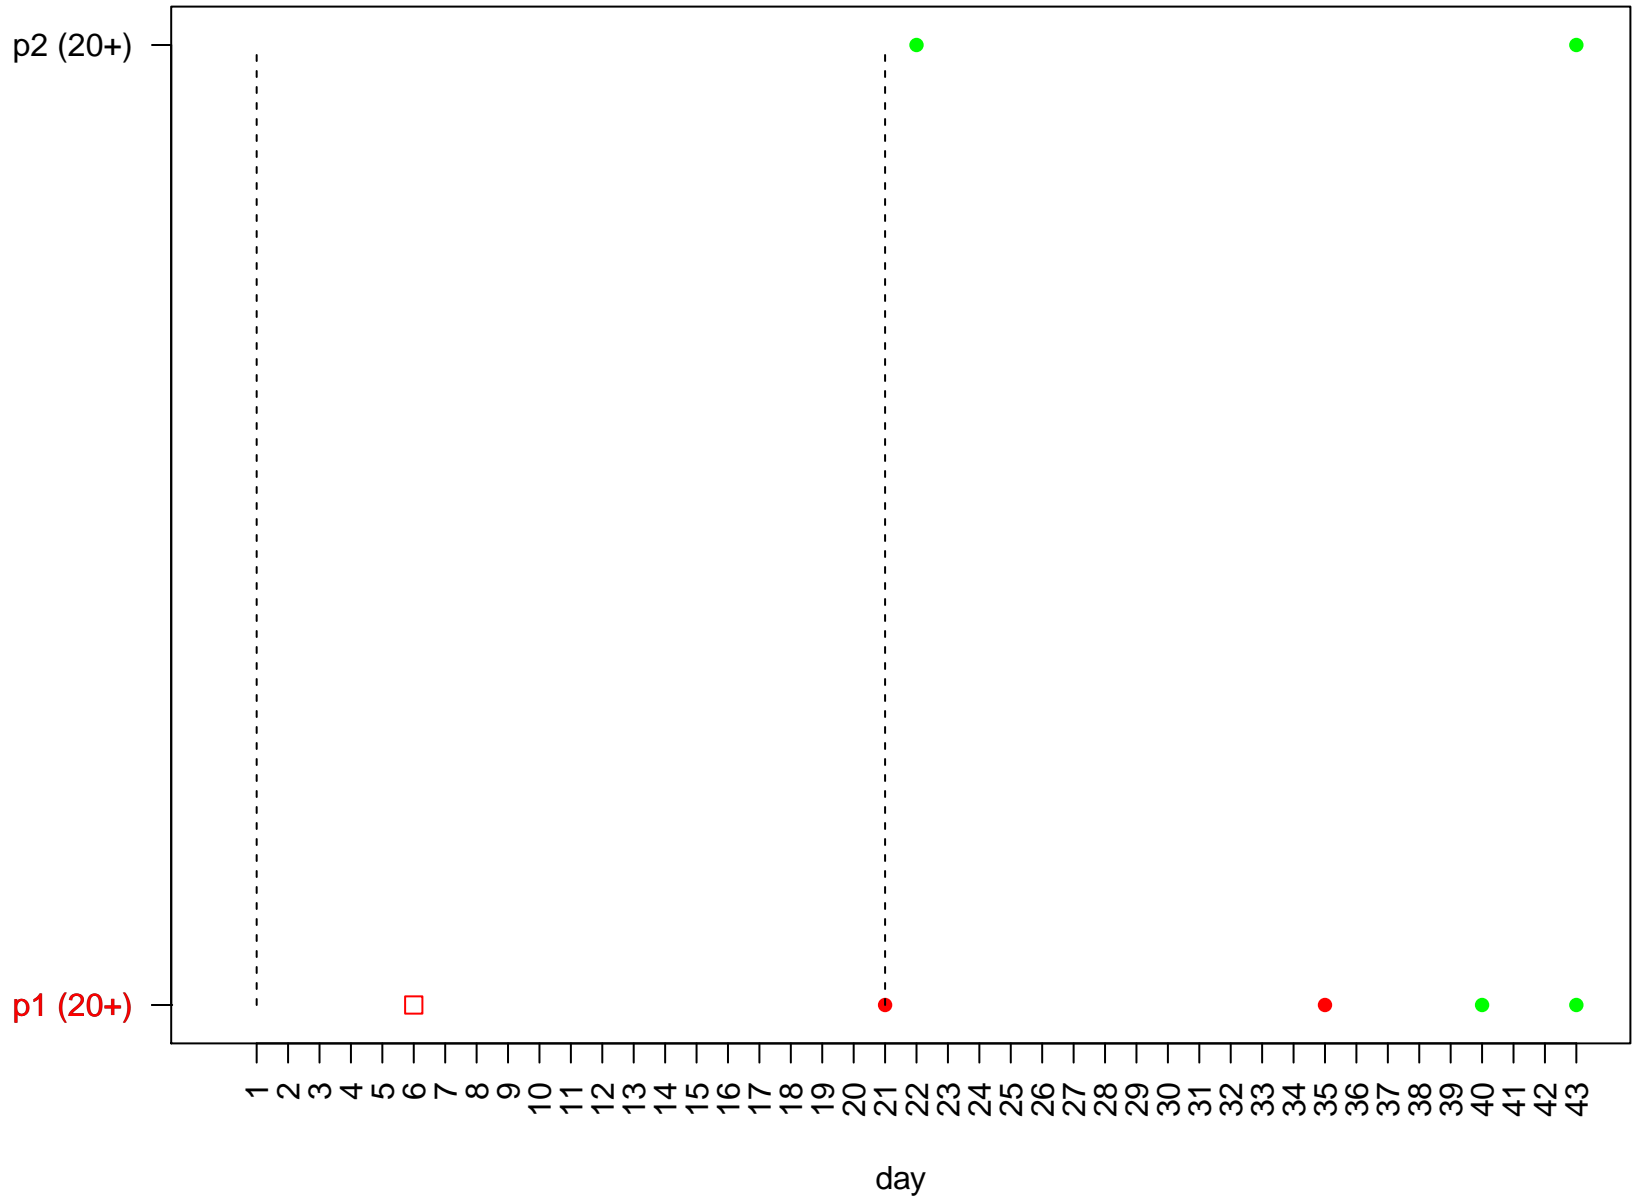



# Household 387

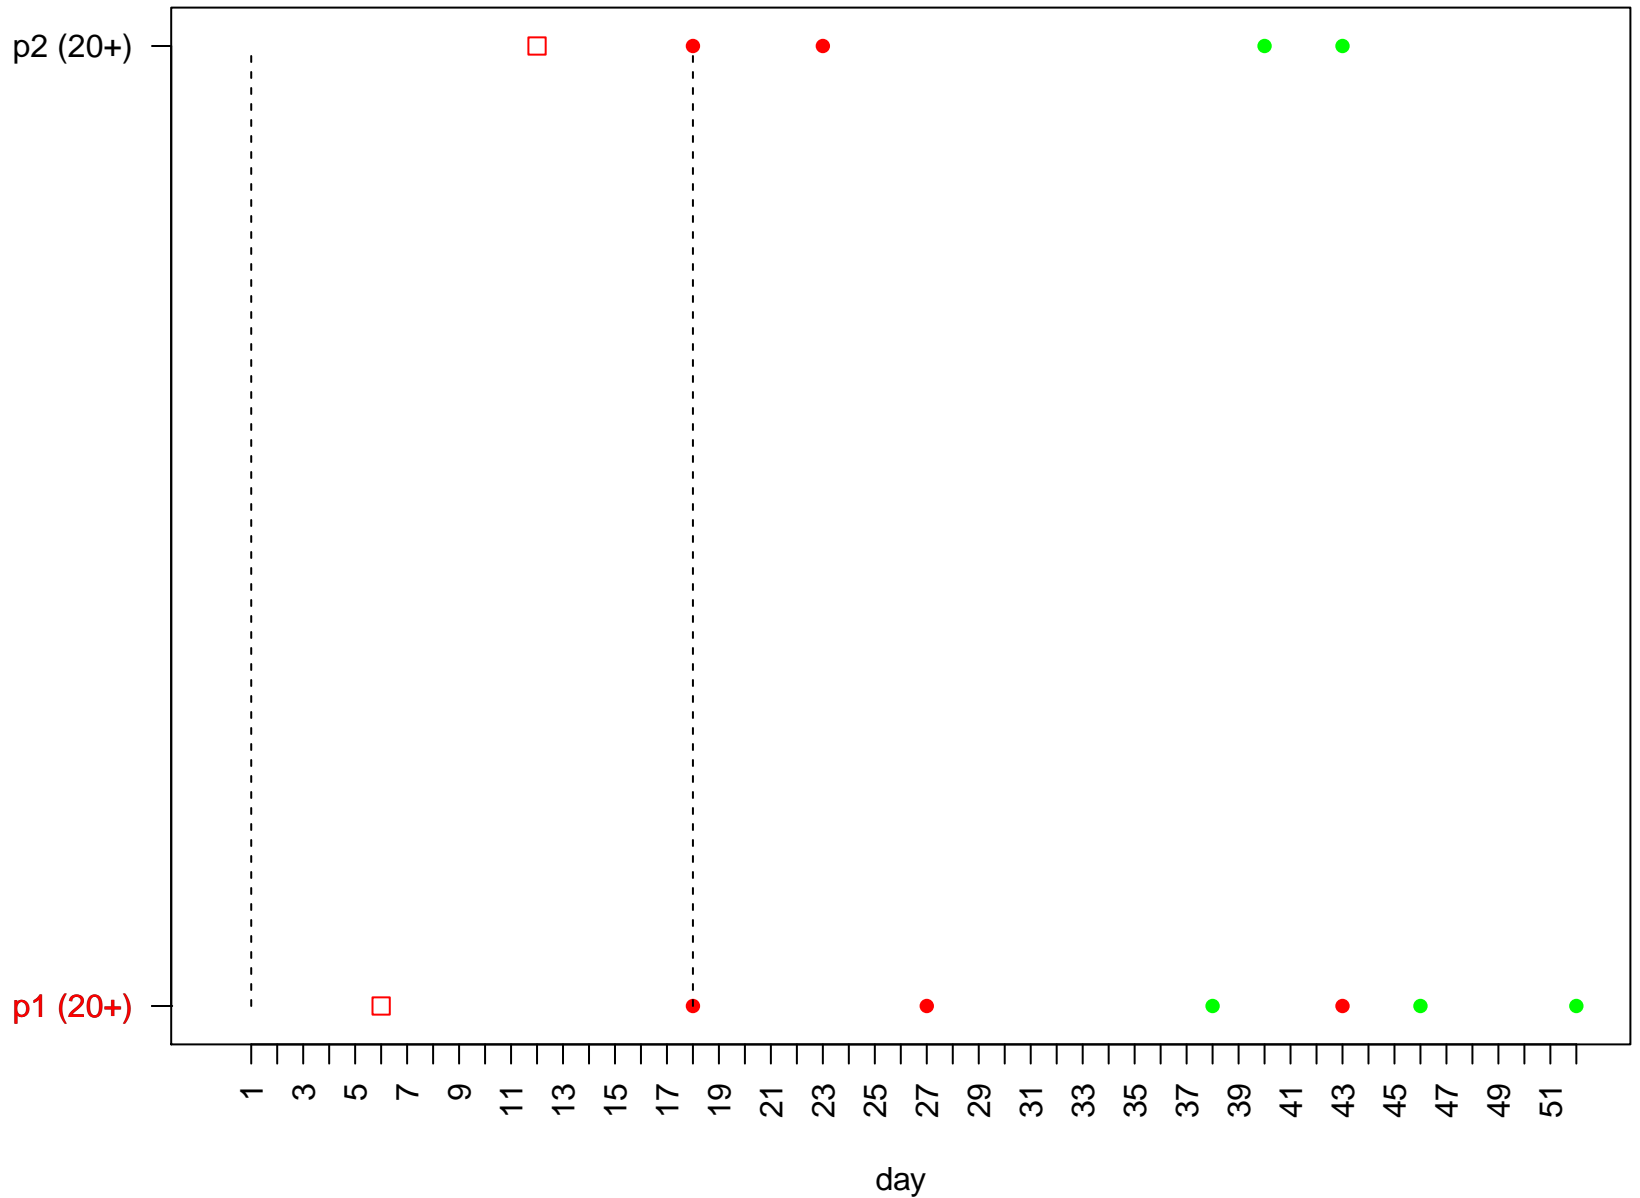

# Household 388

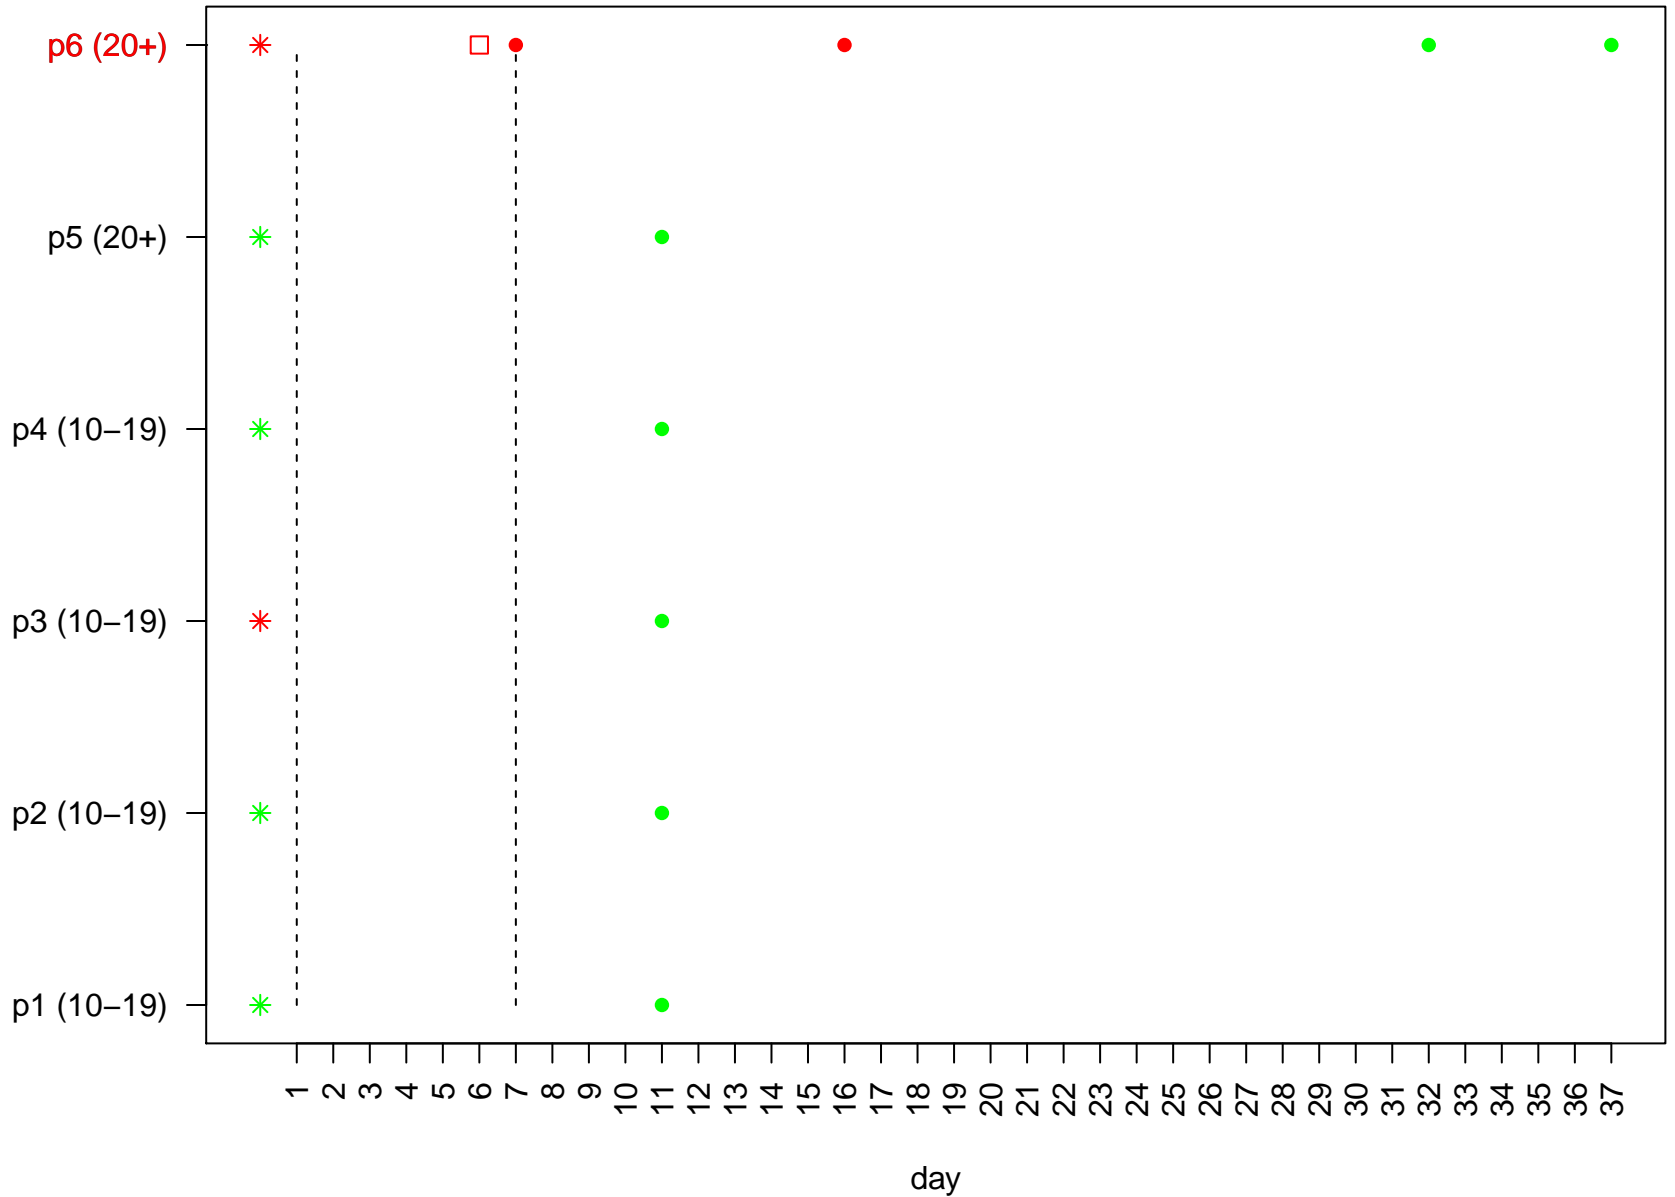

# Household 389

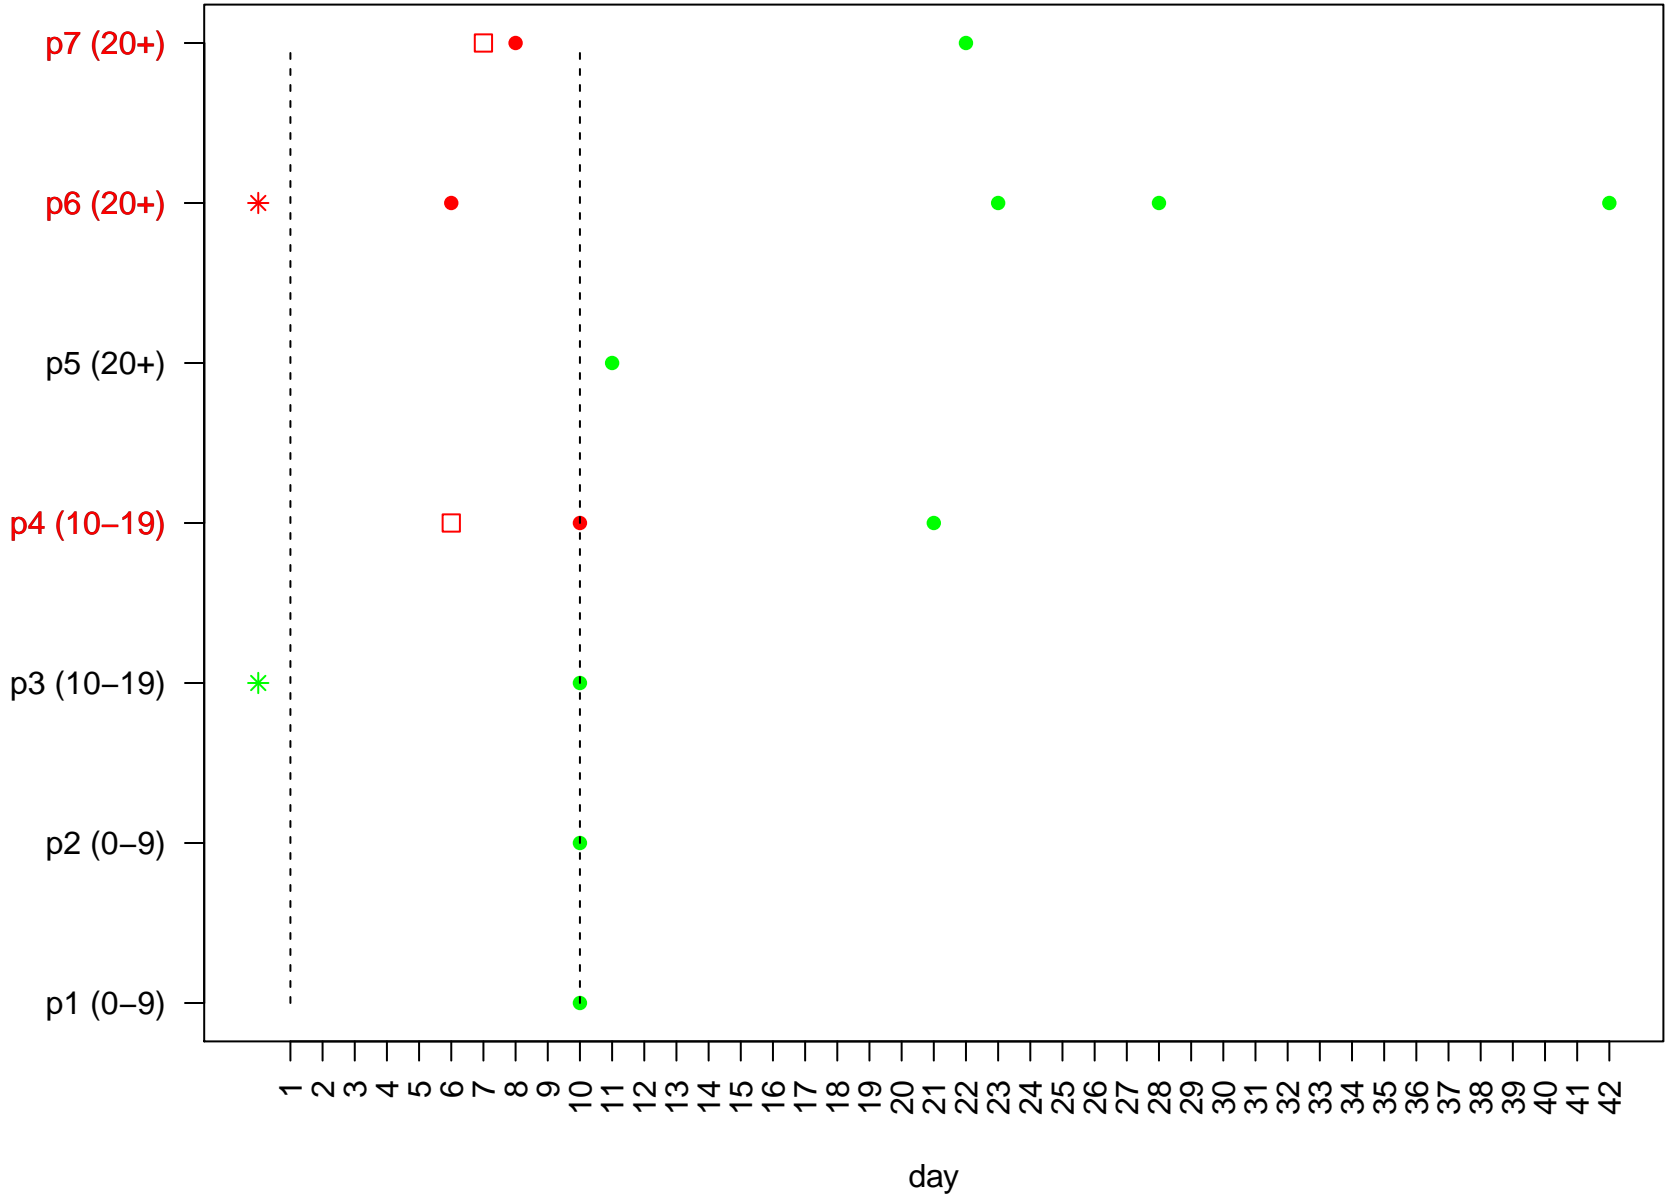

# Household 392

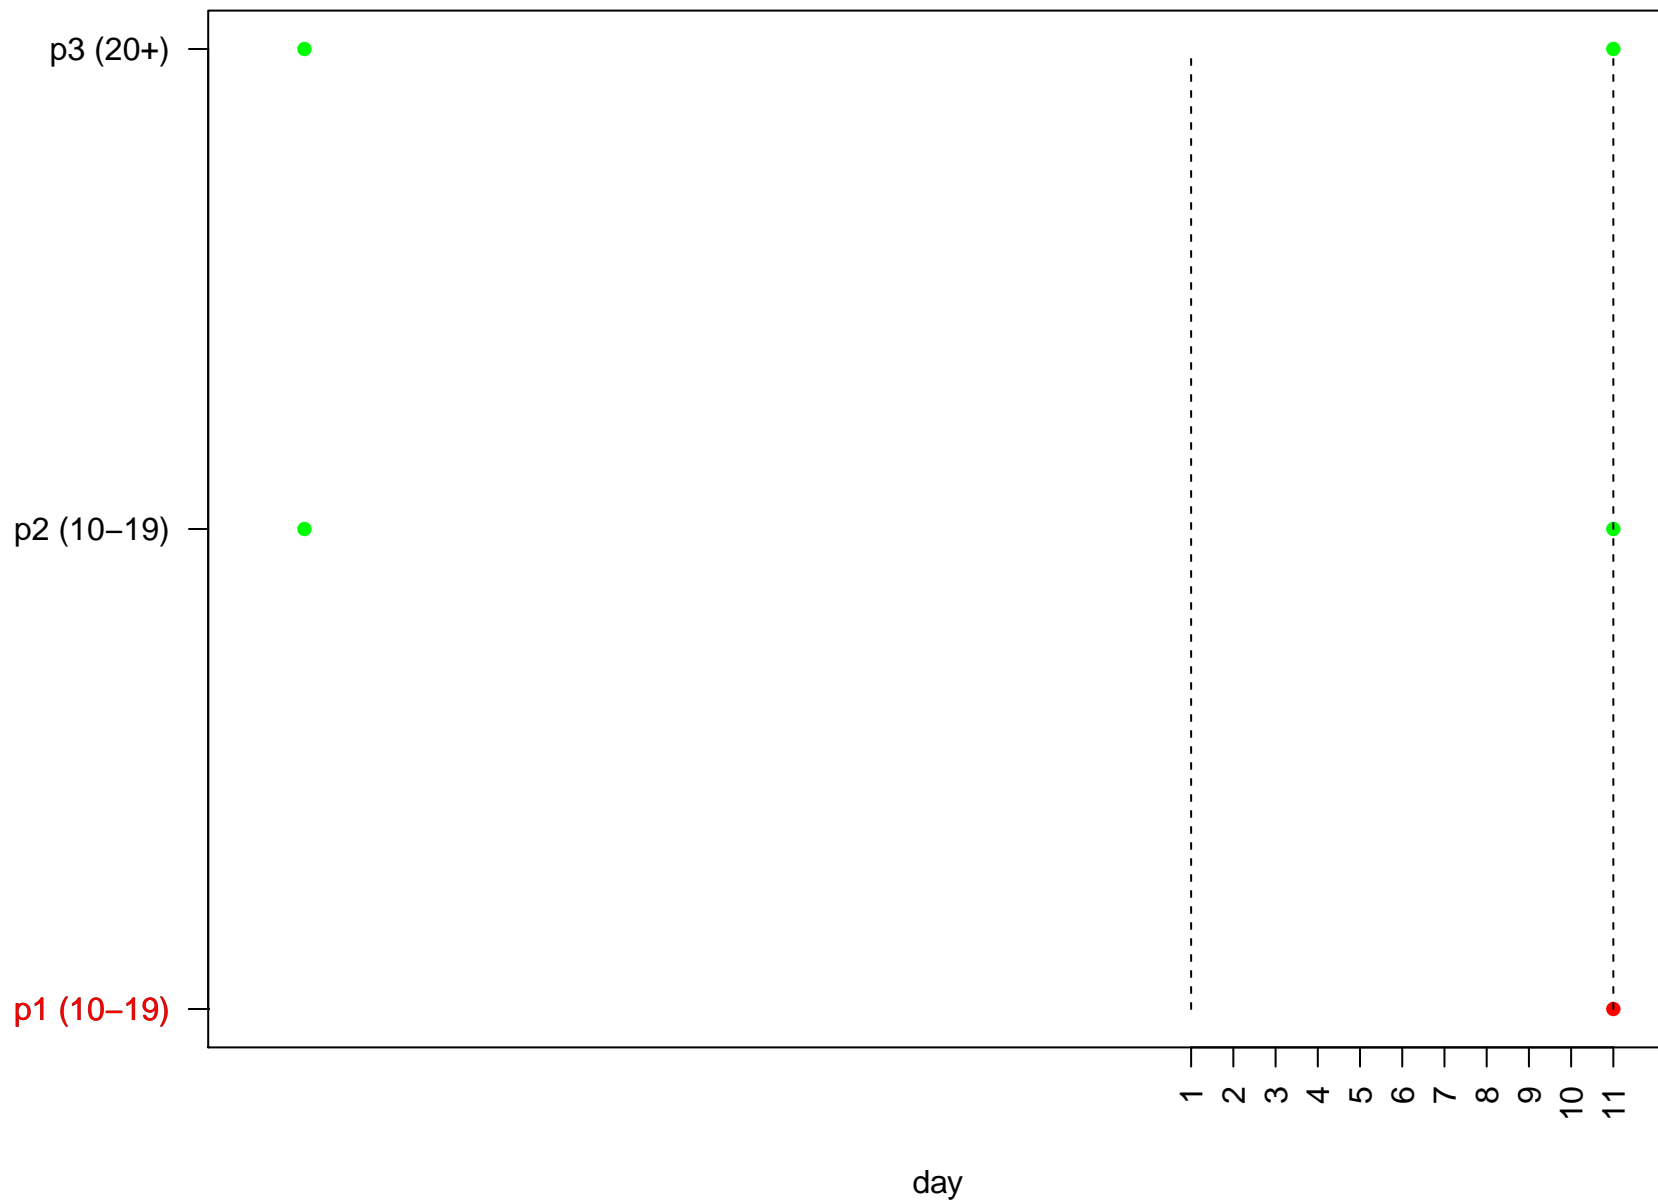

# Household 393

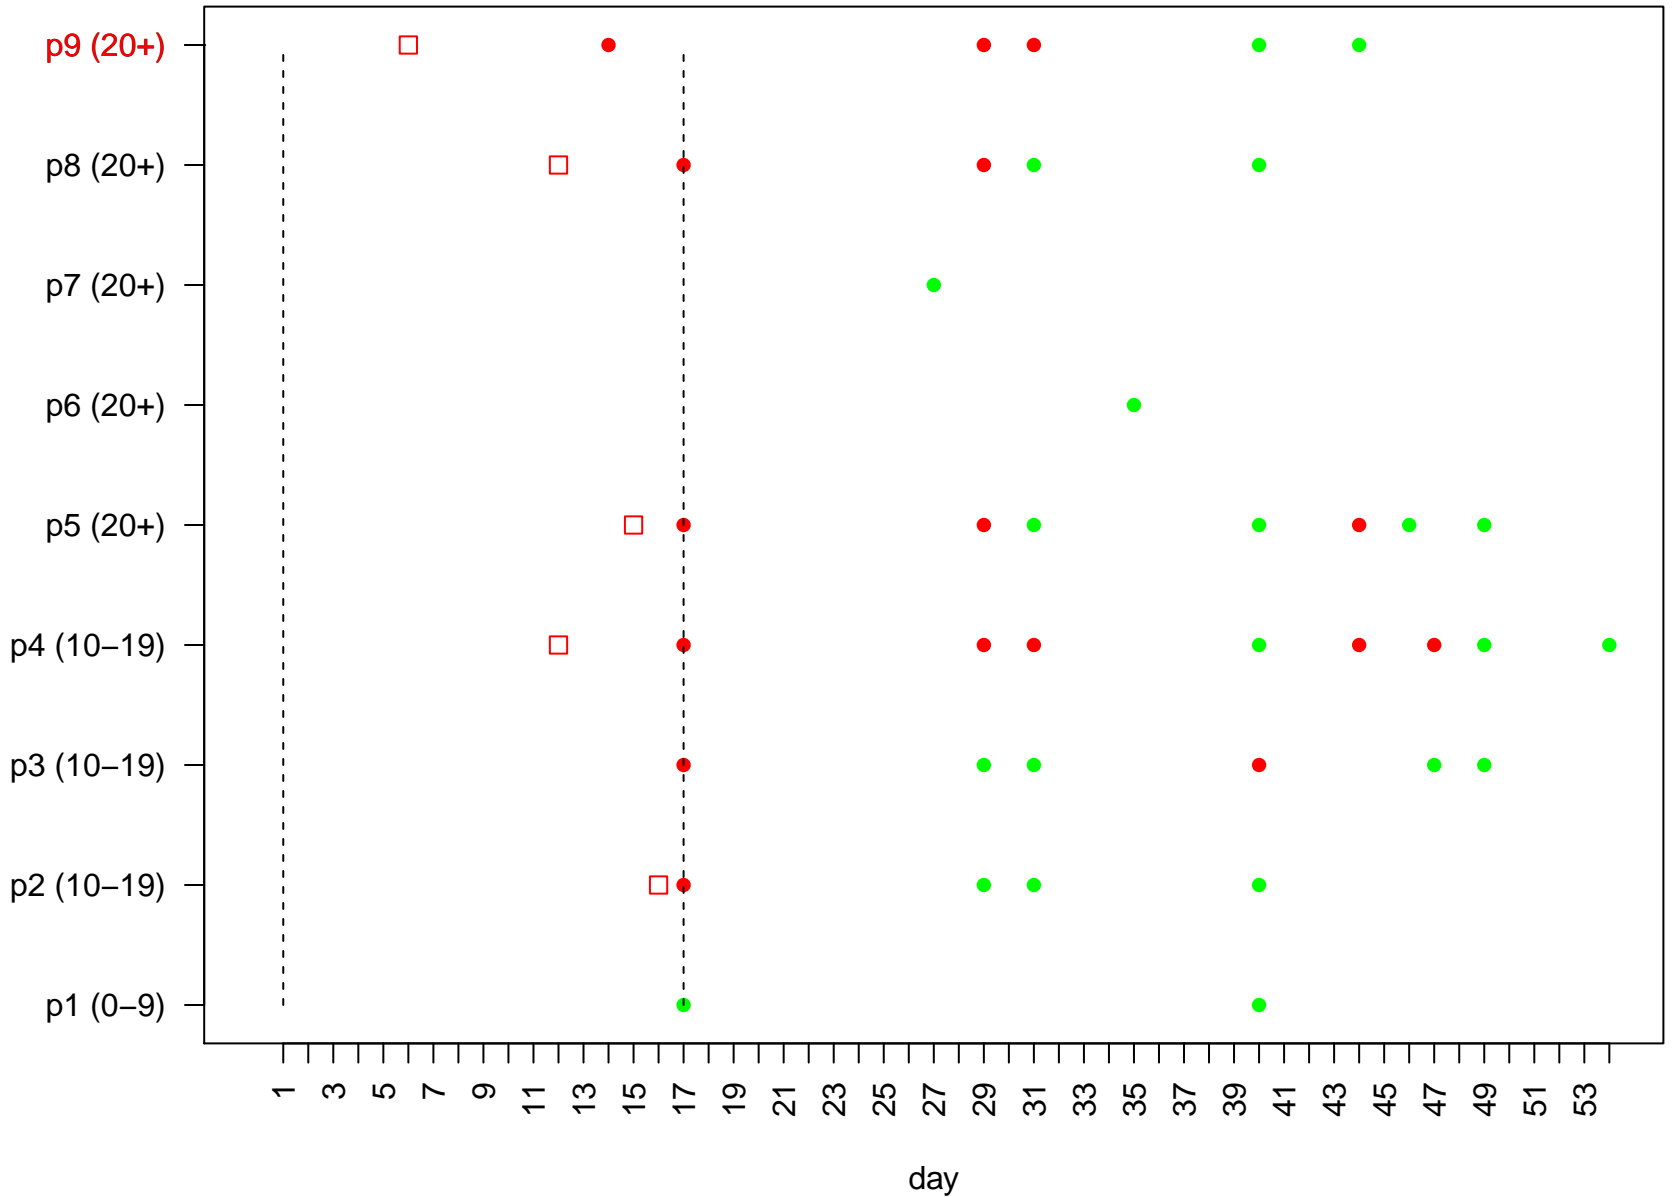

# Household 395

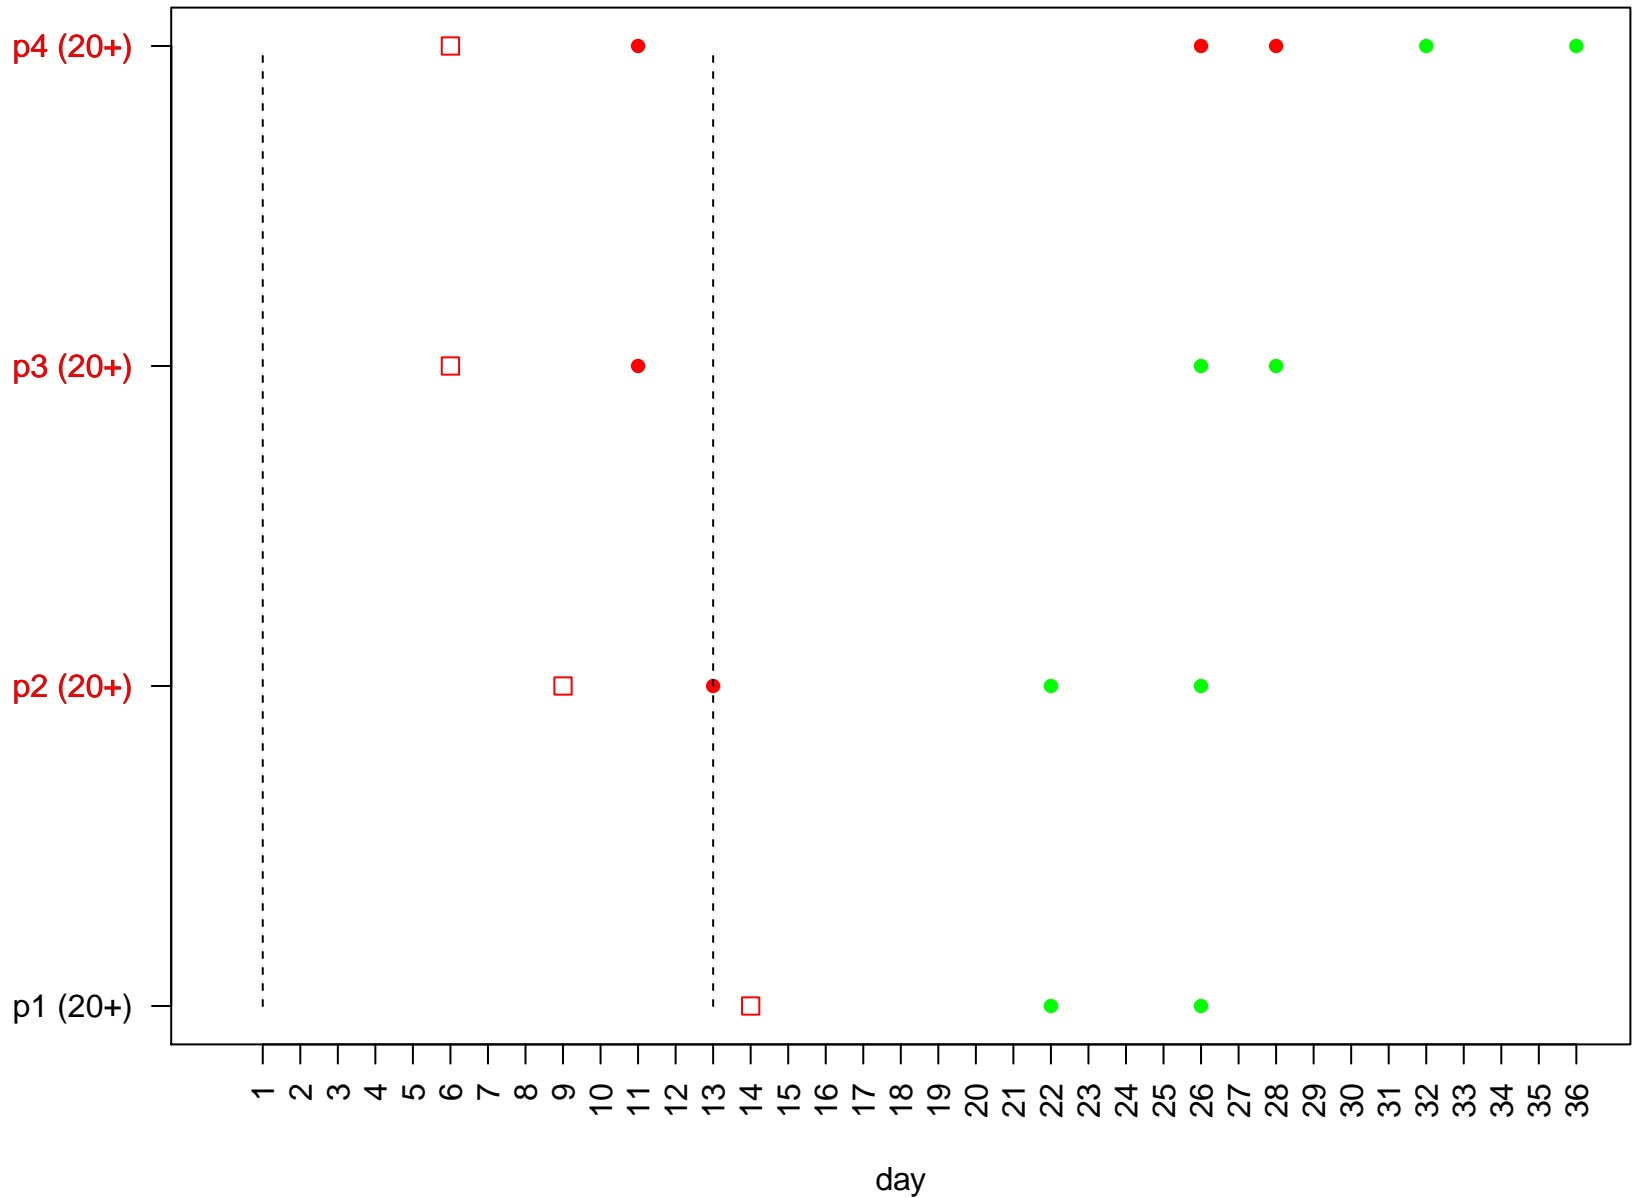

# Household 396

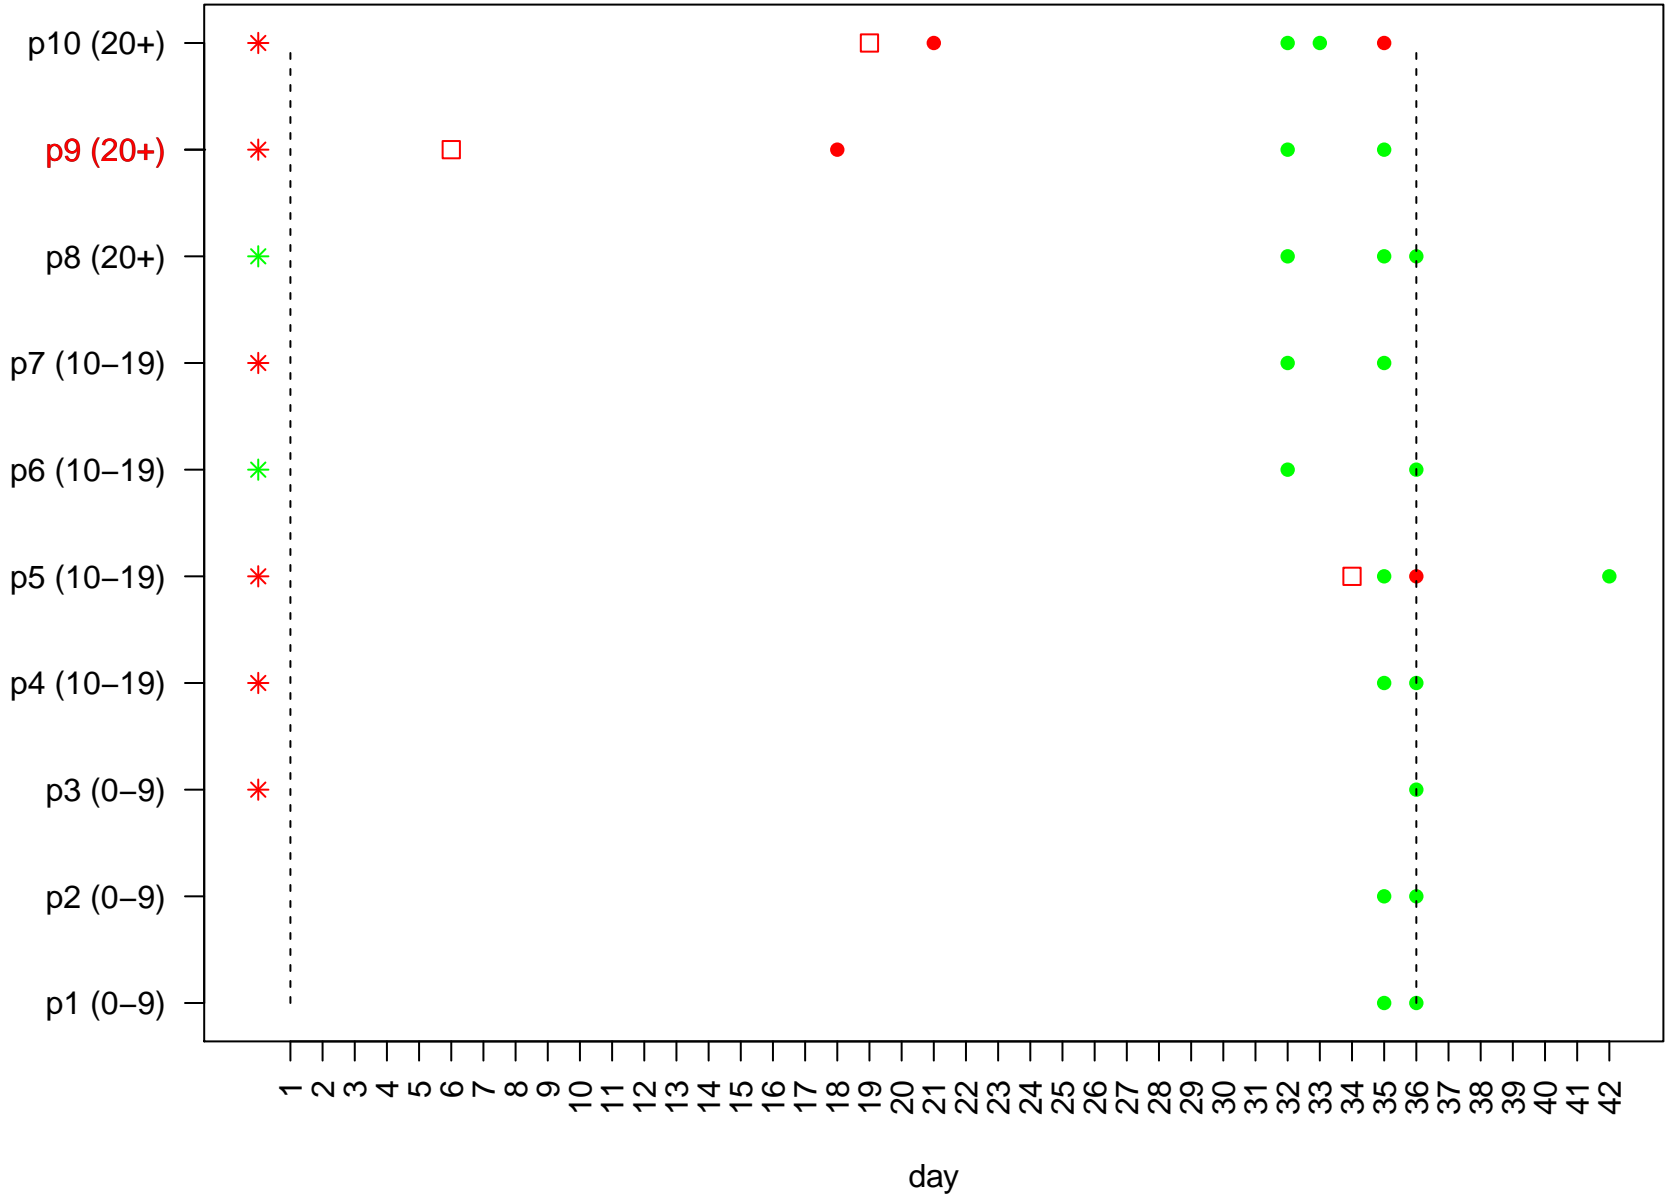

# Household 398

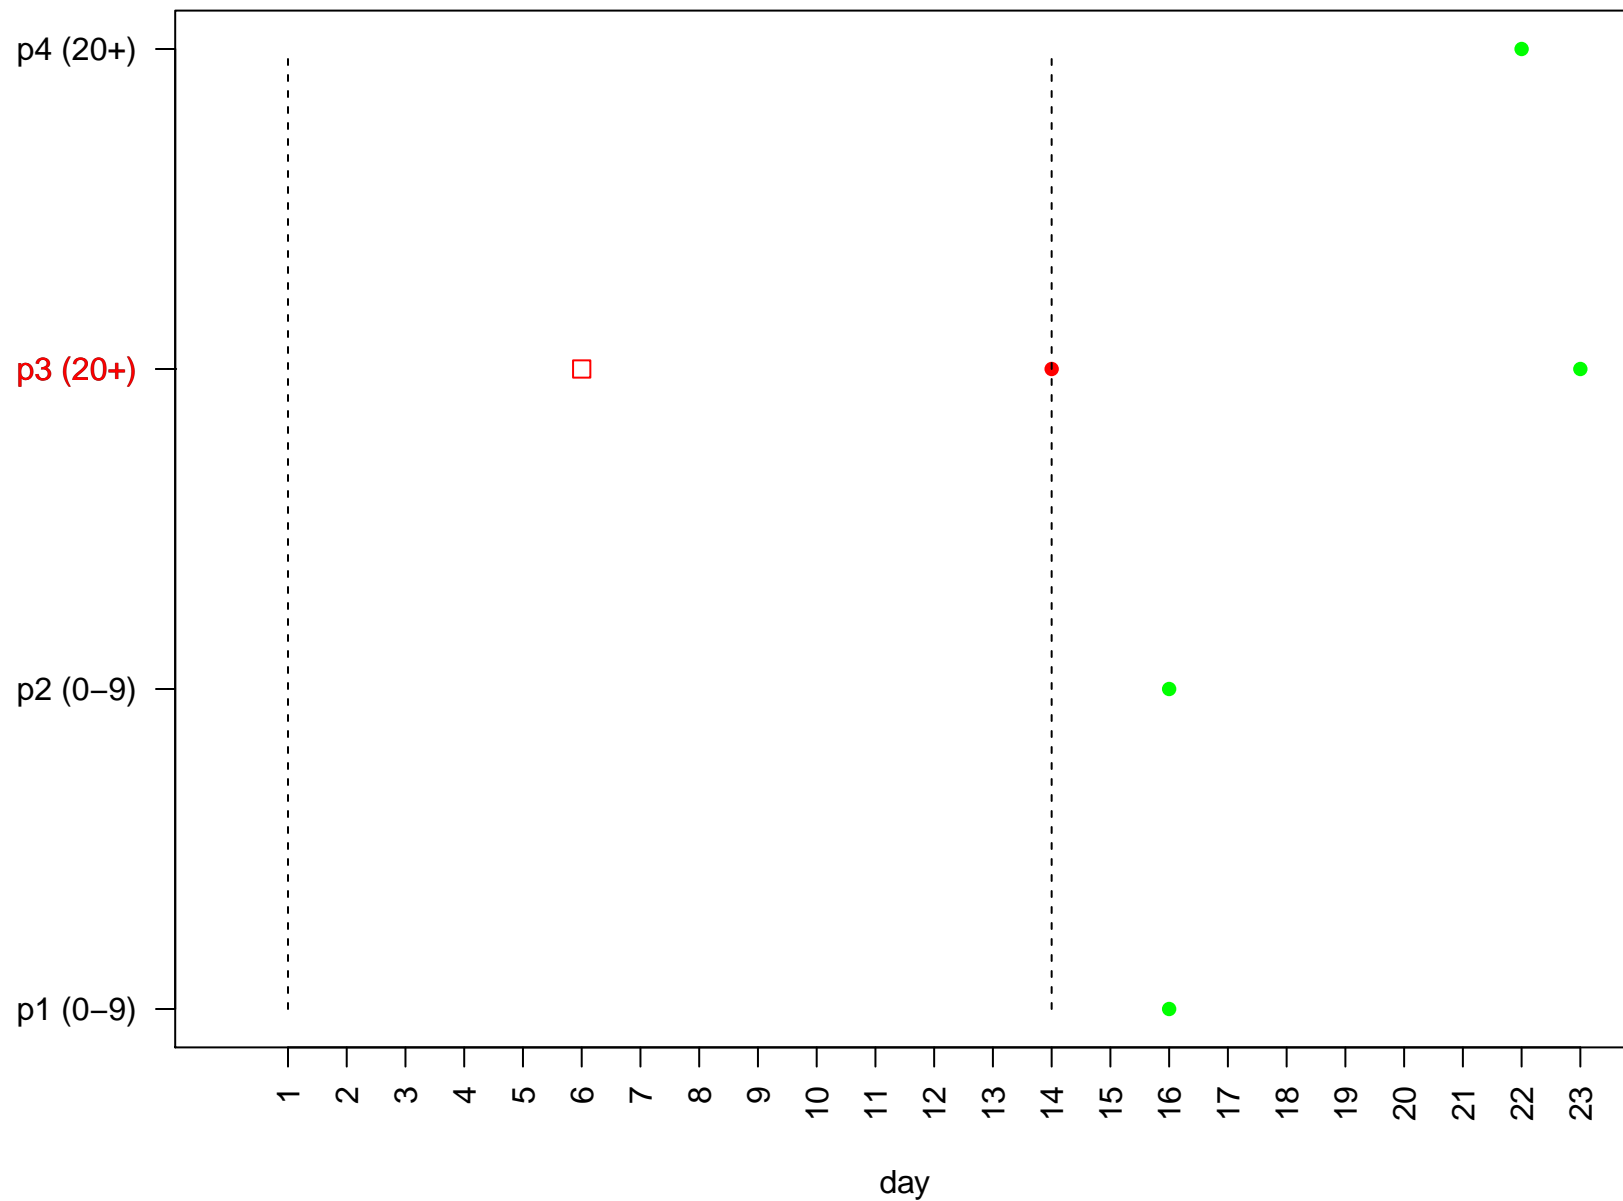



# Household 399

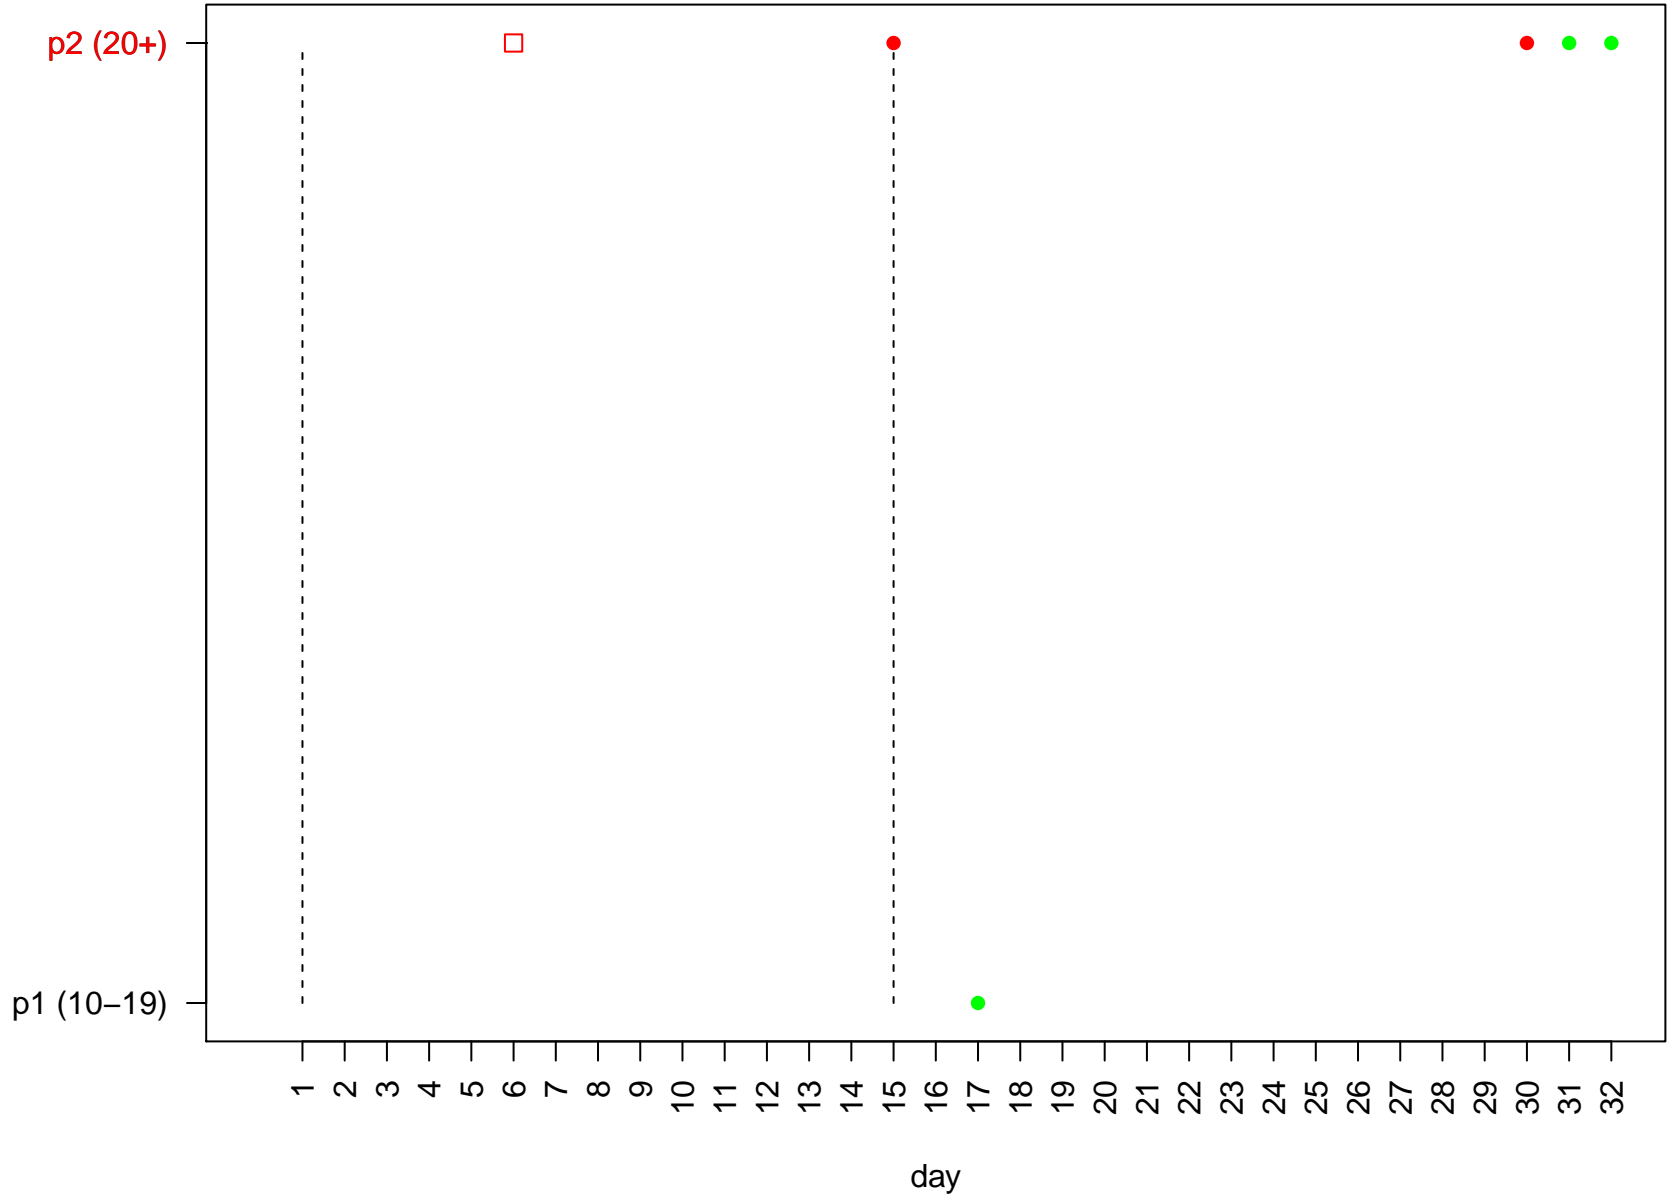

# Household 400

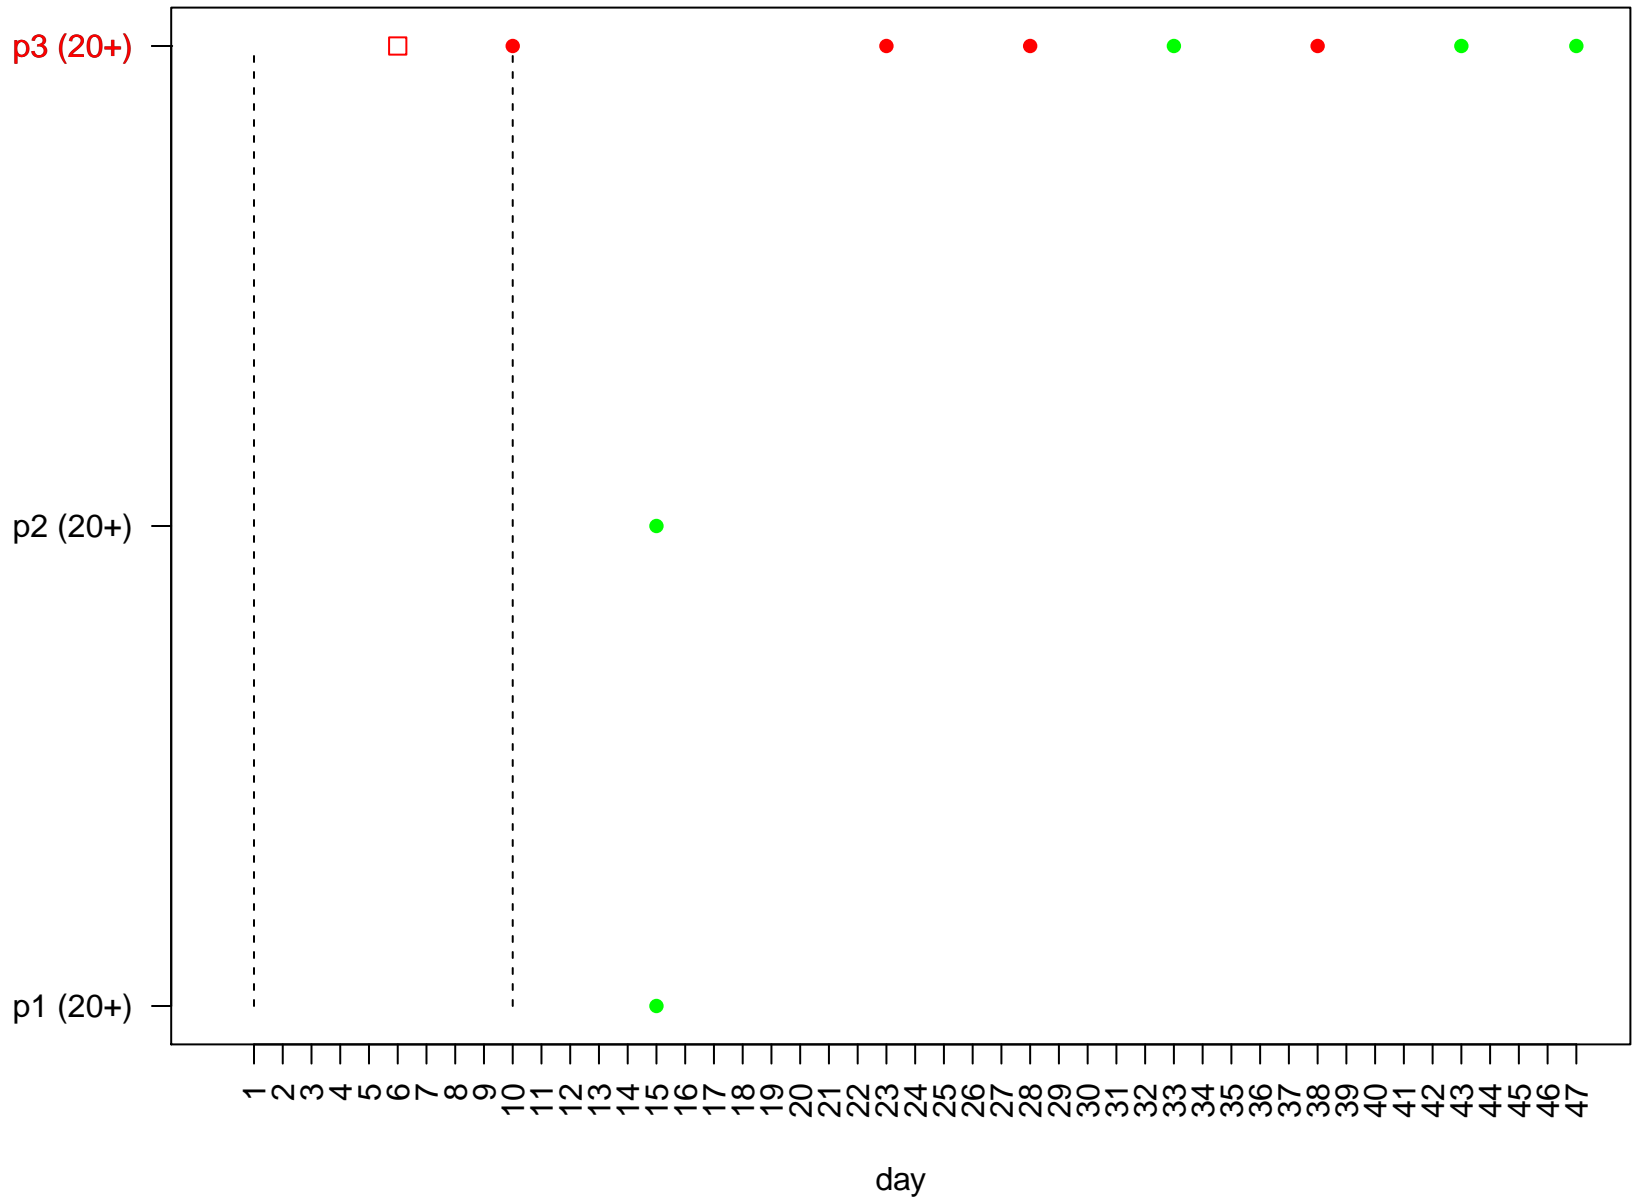

# Household 401

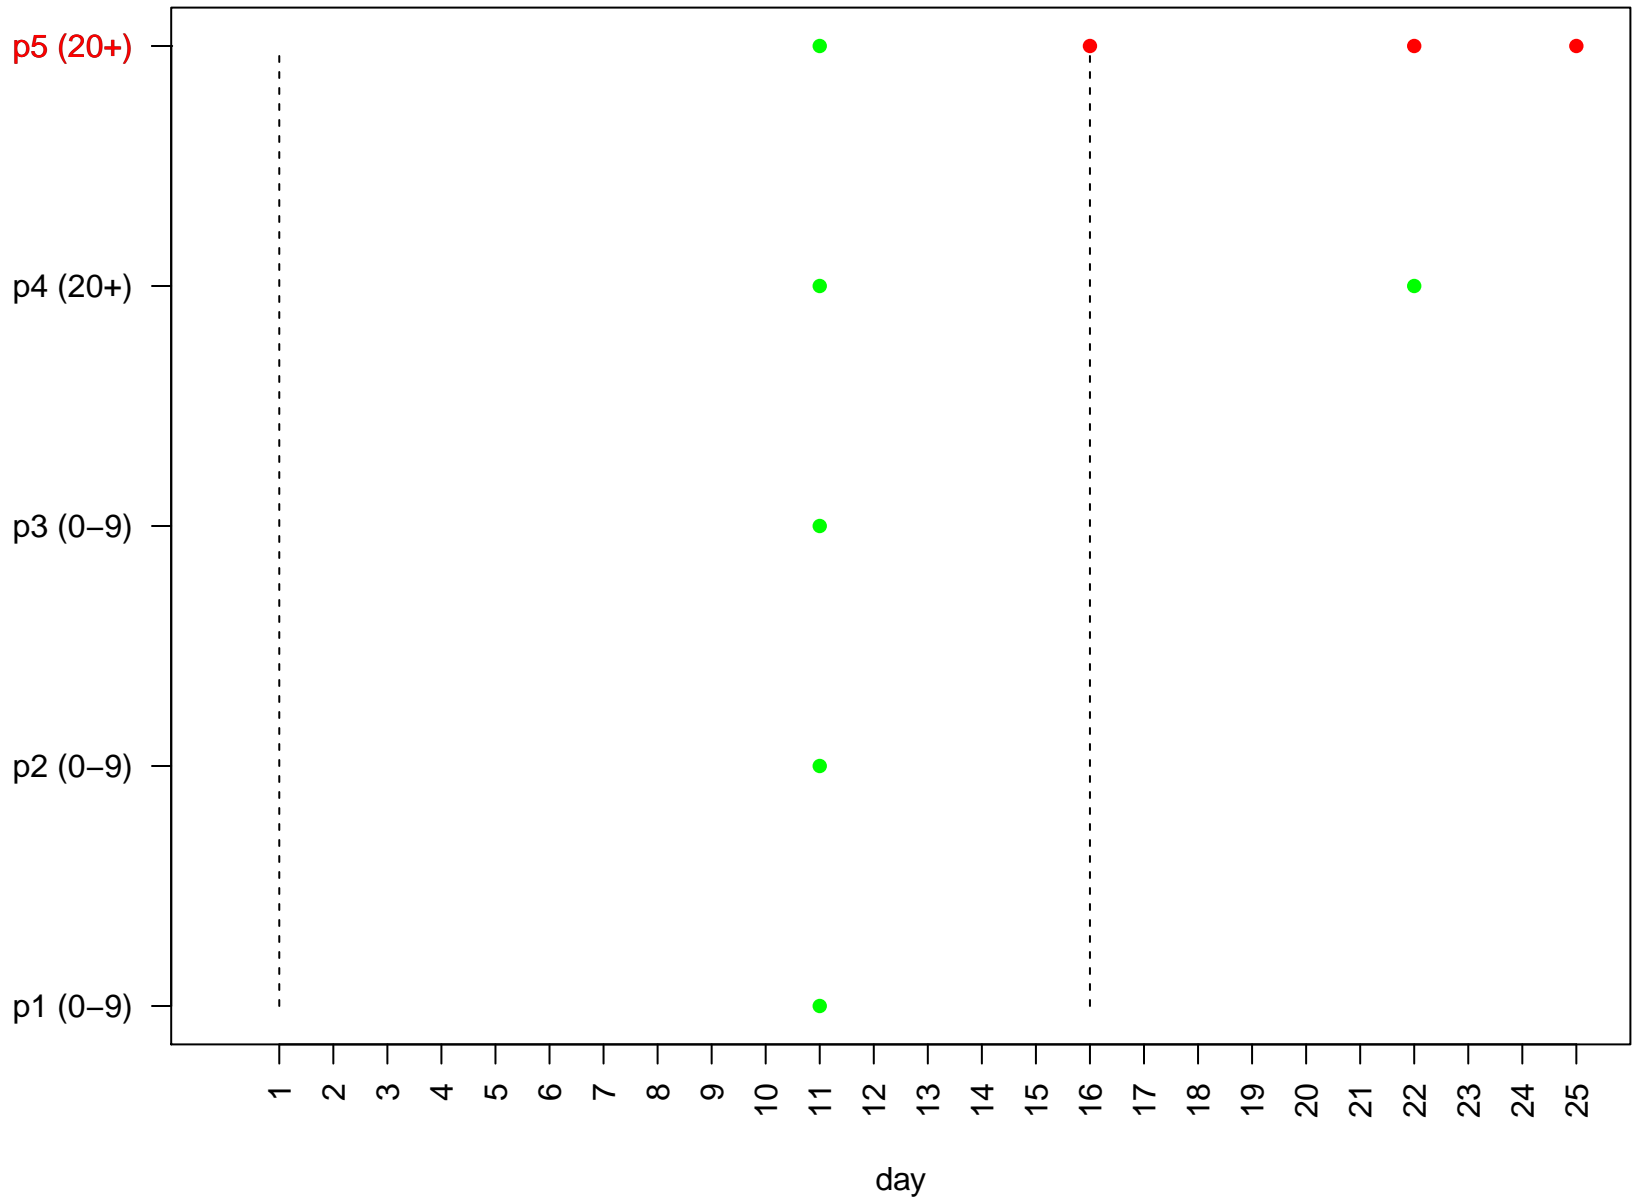

# Household 402

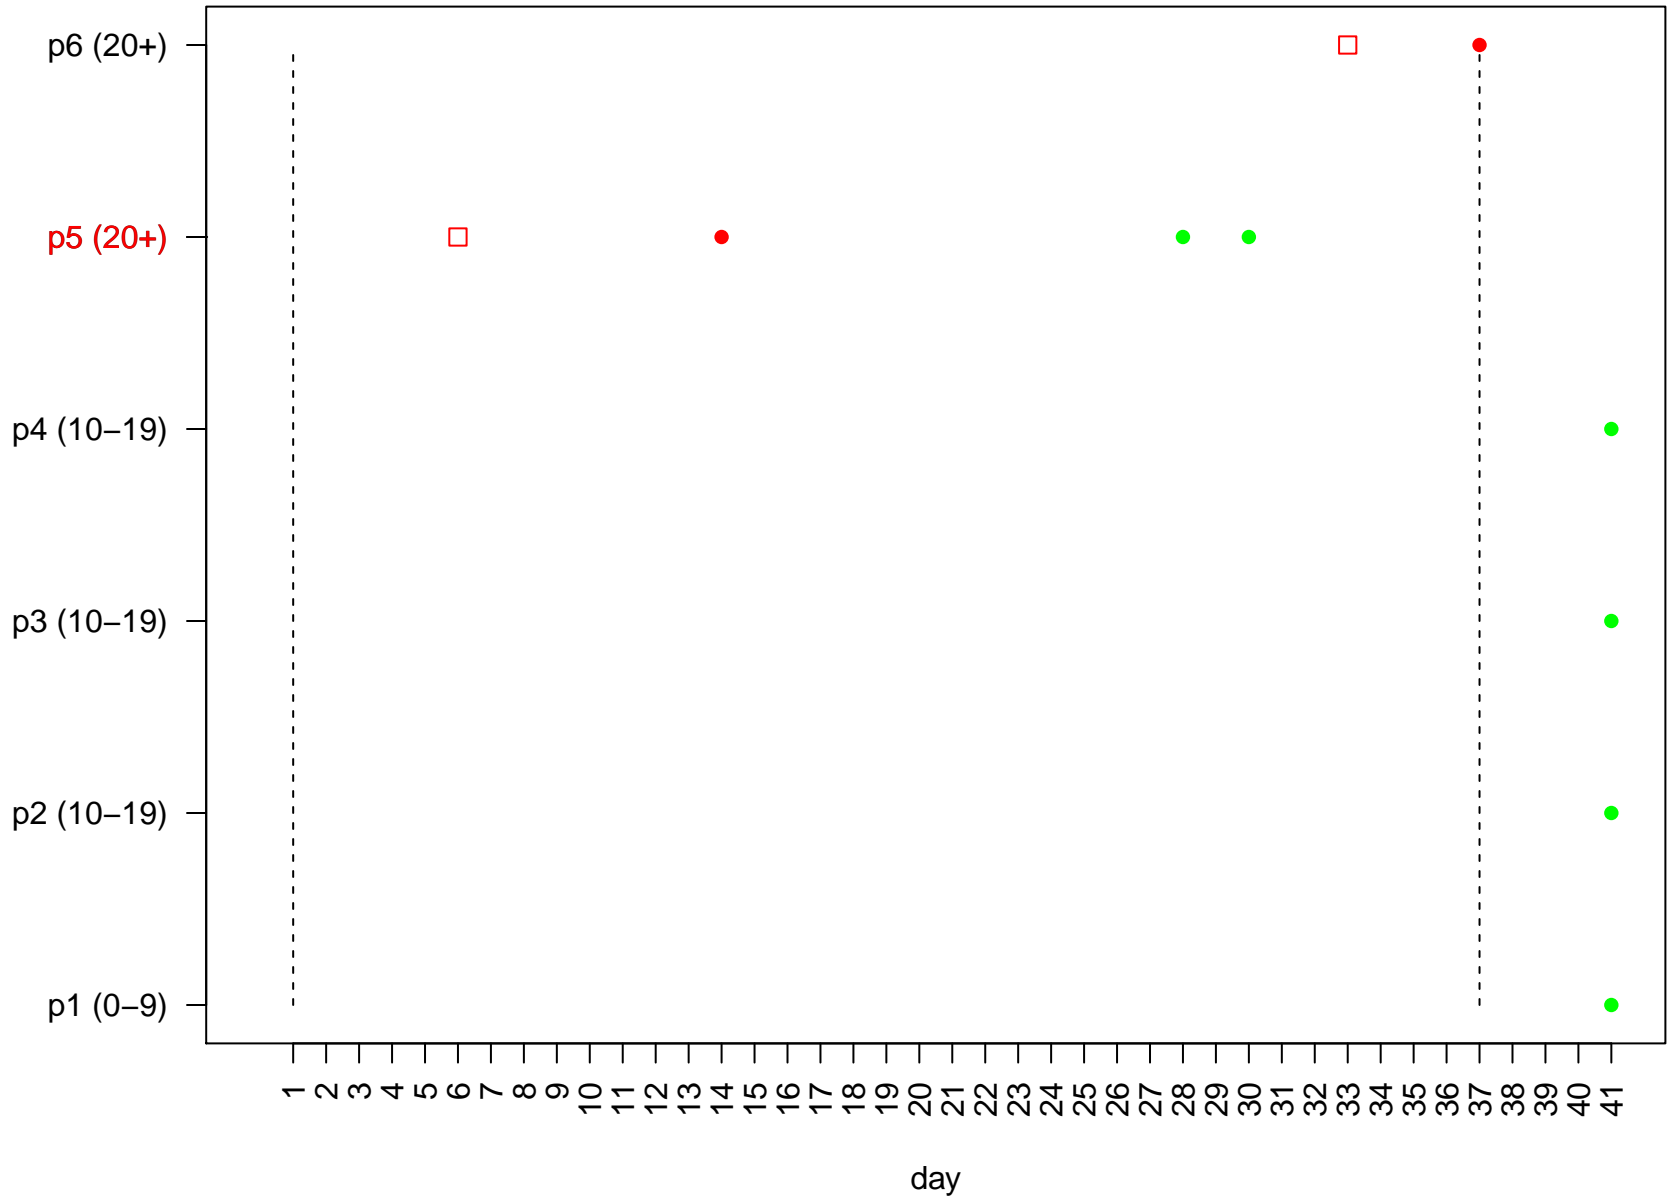



# Household 404

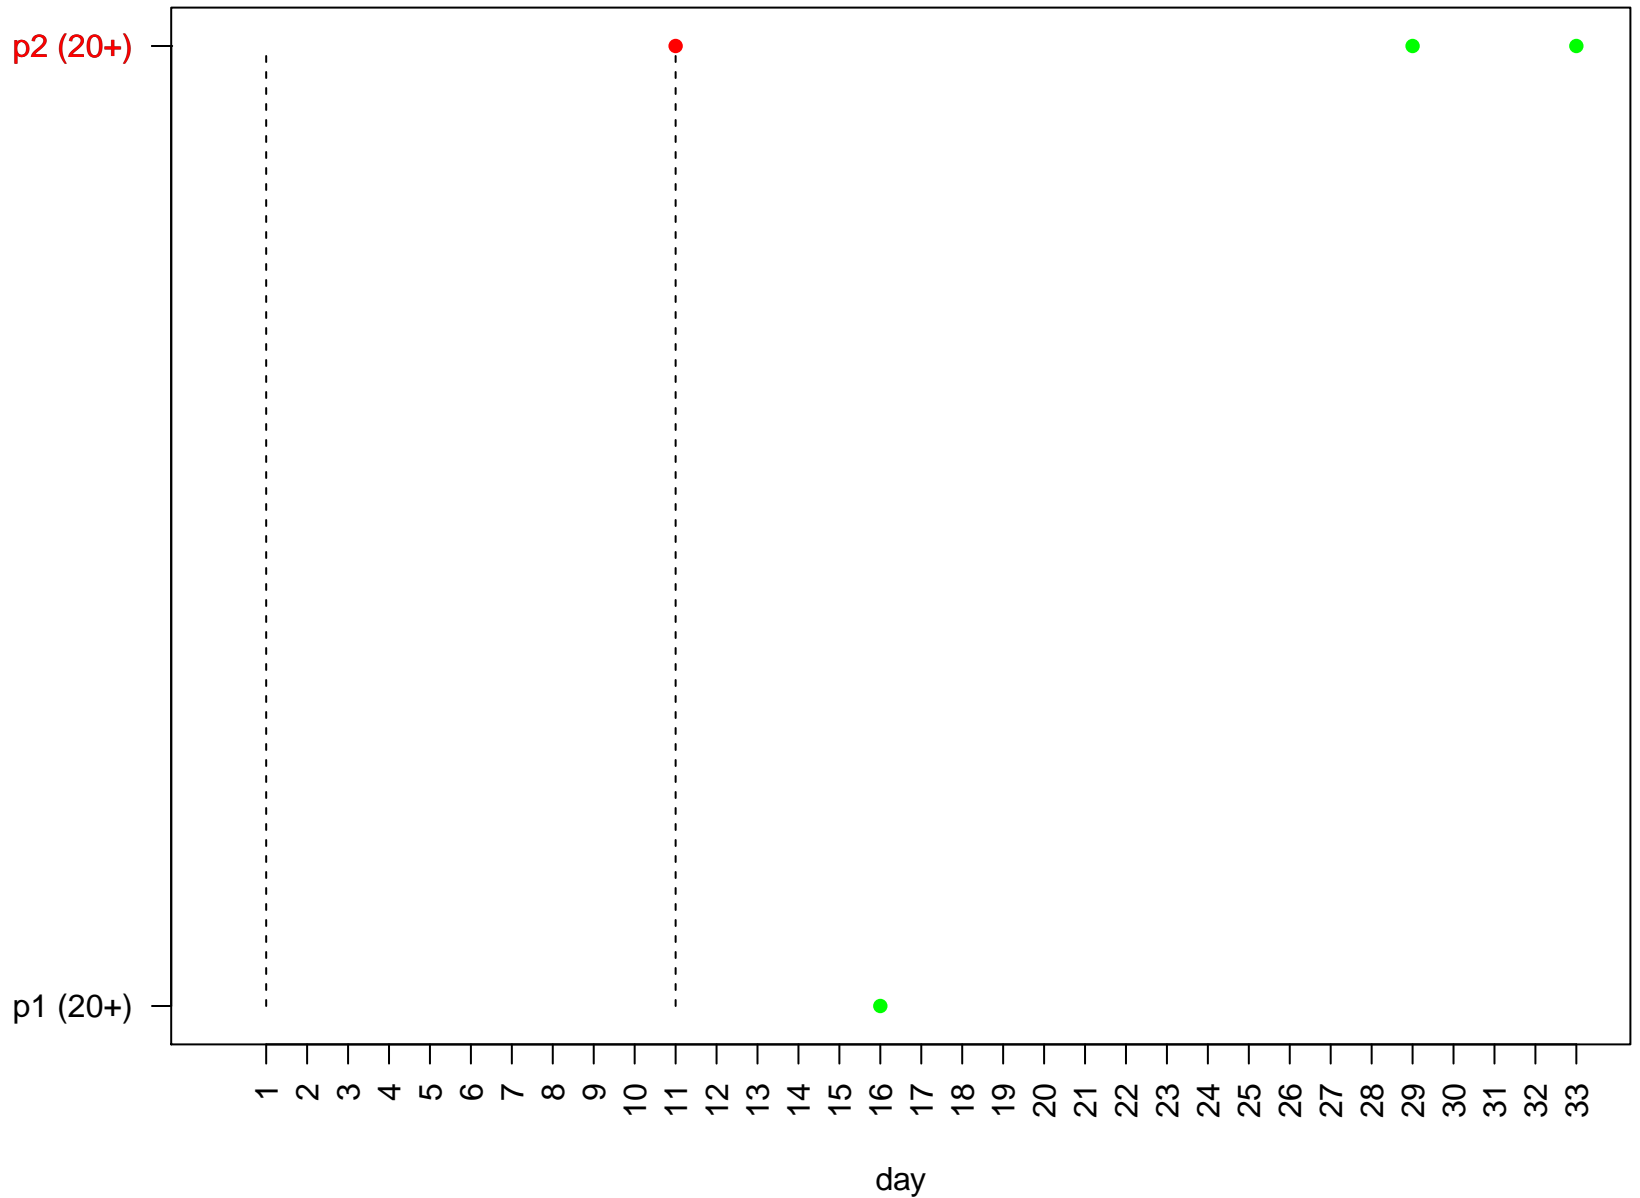

# Household 405

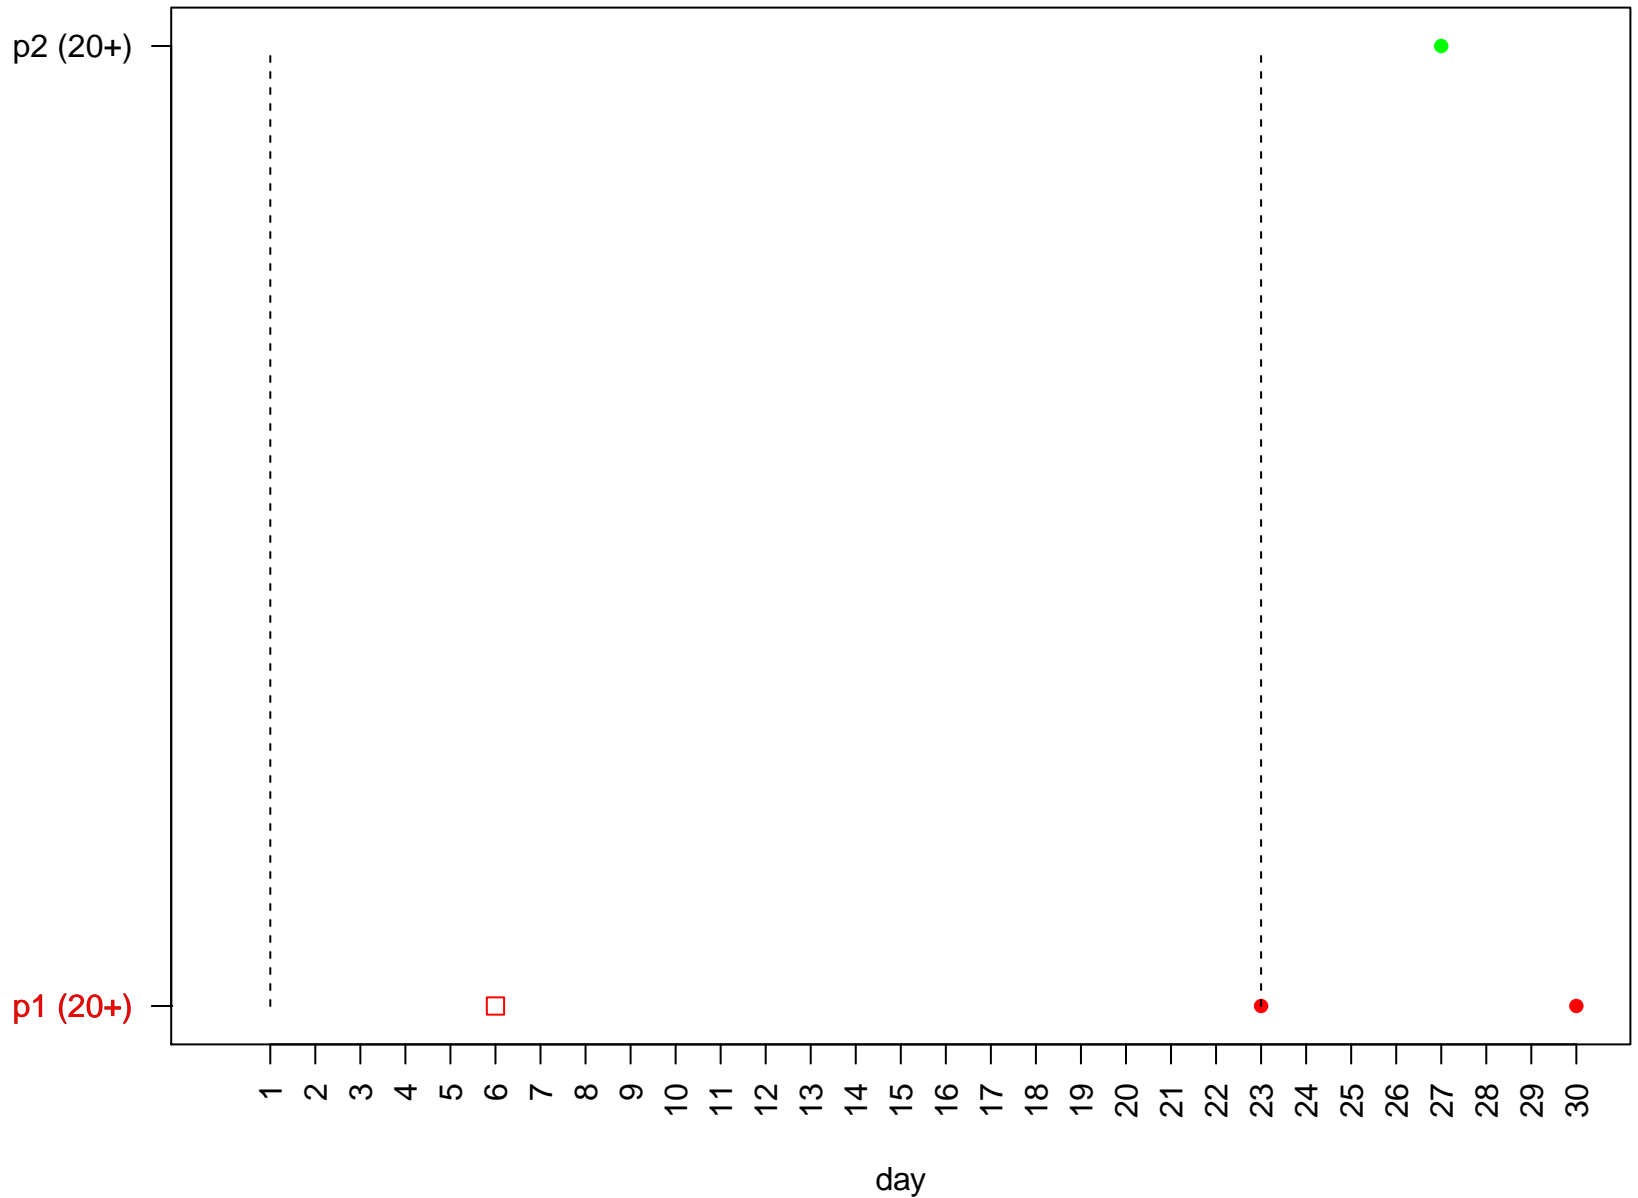

# Household 406

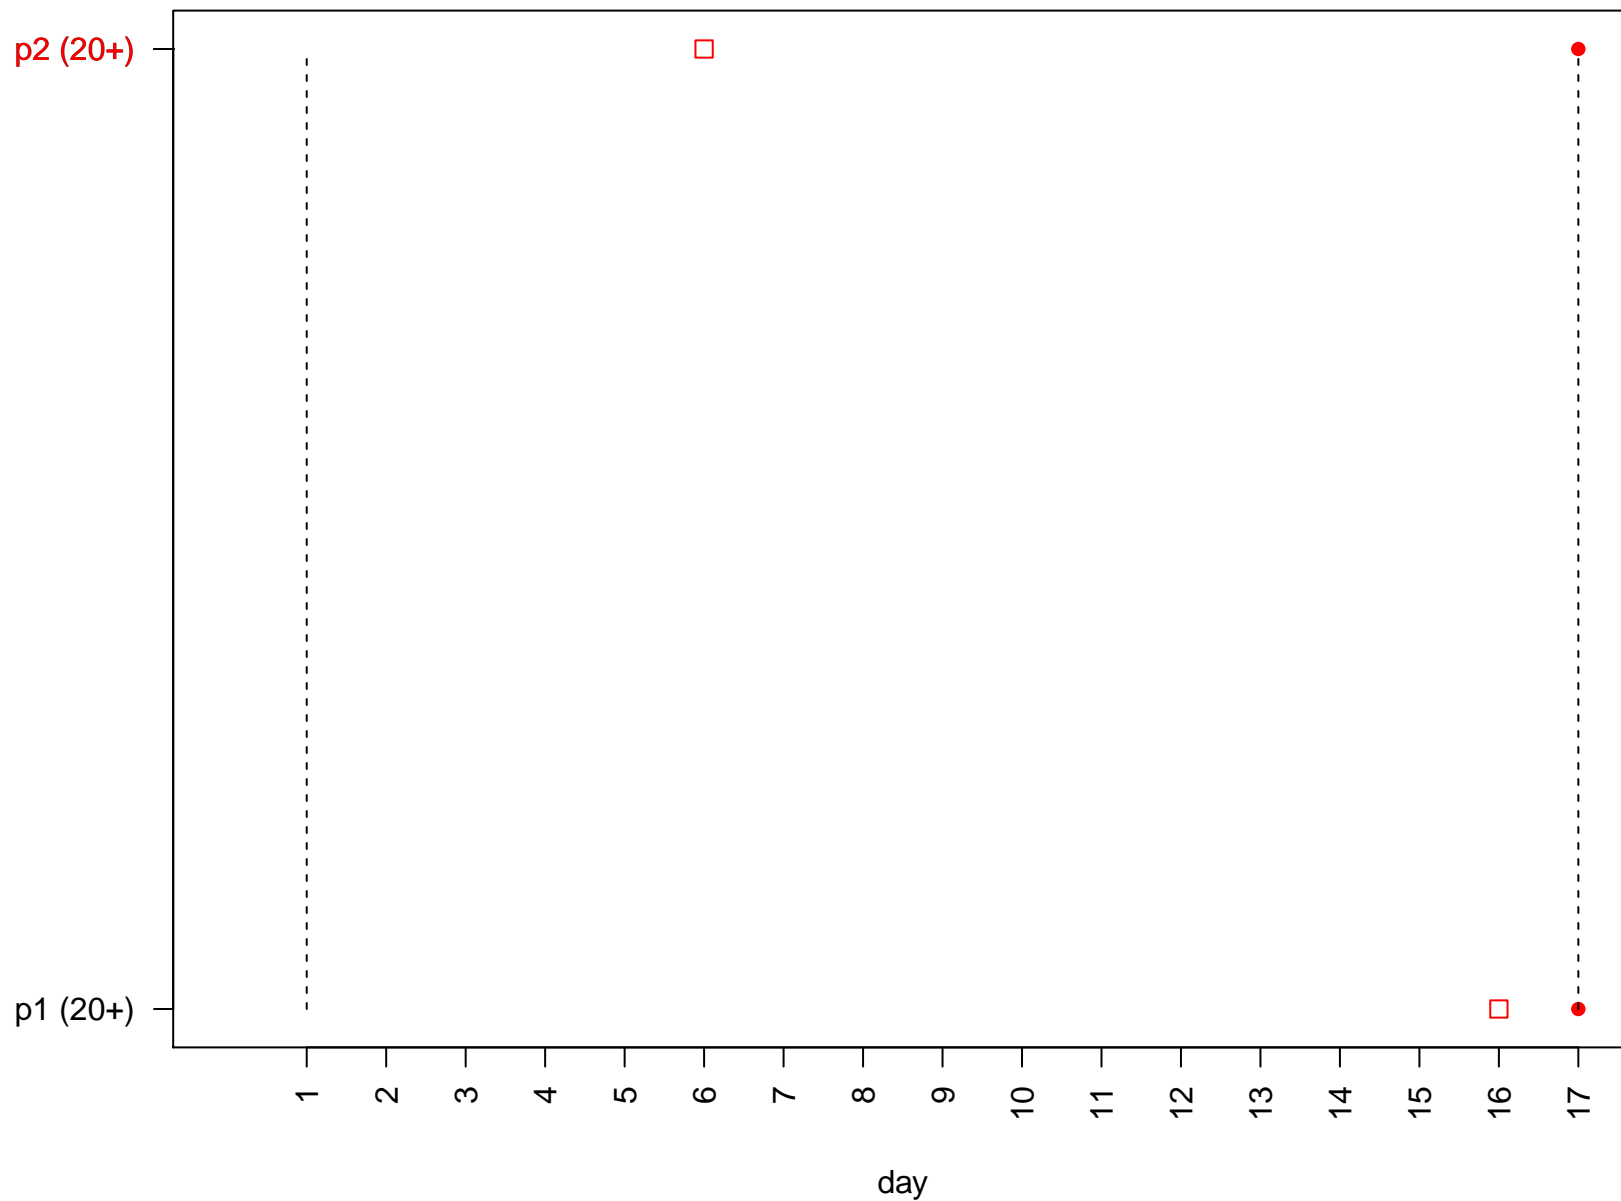



# Household 407

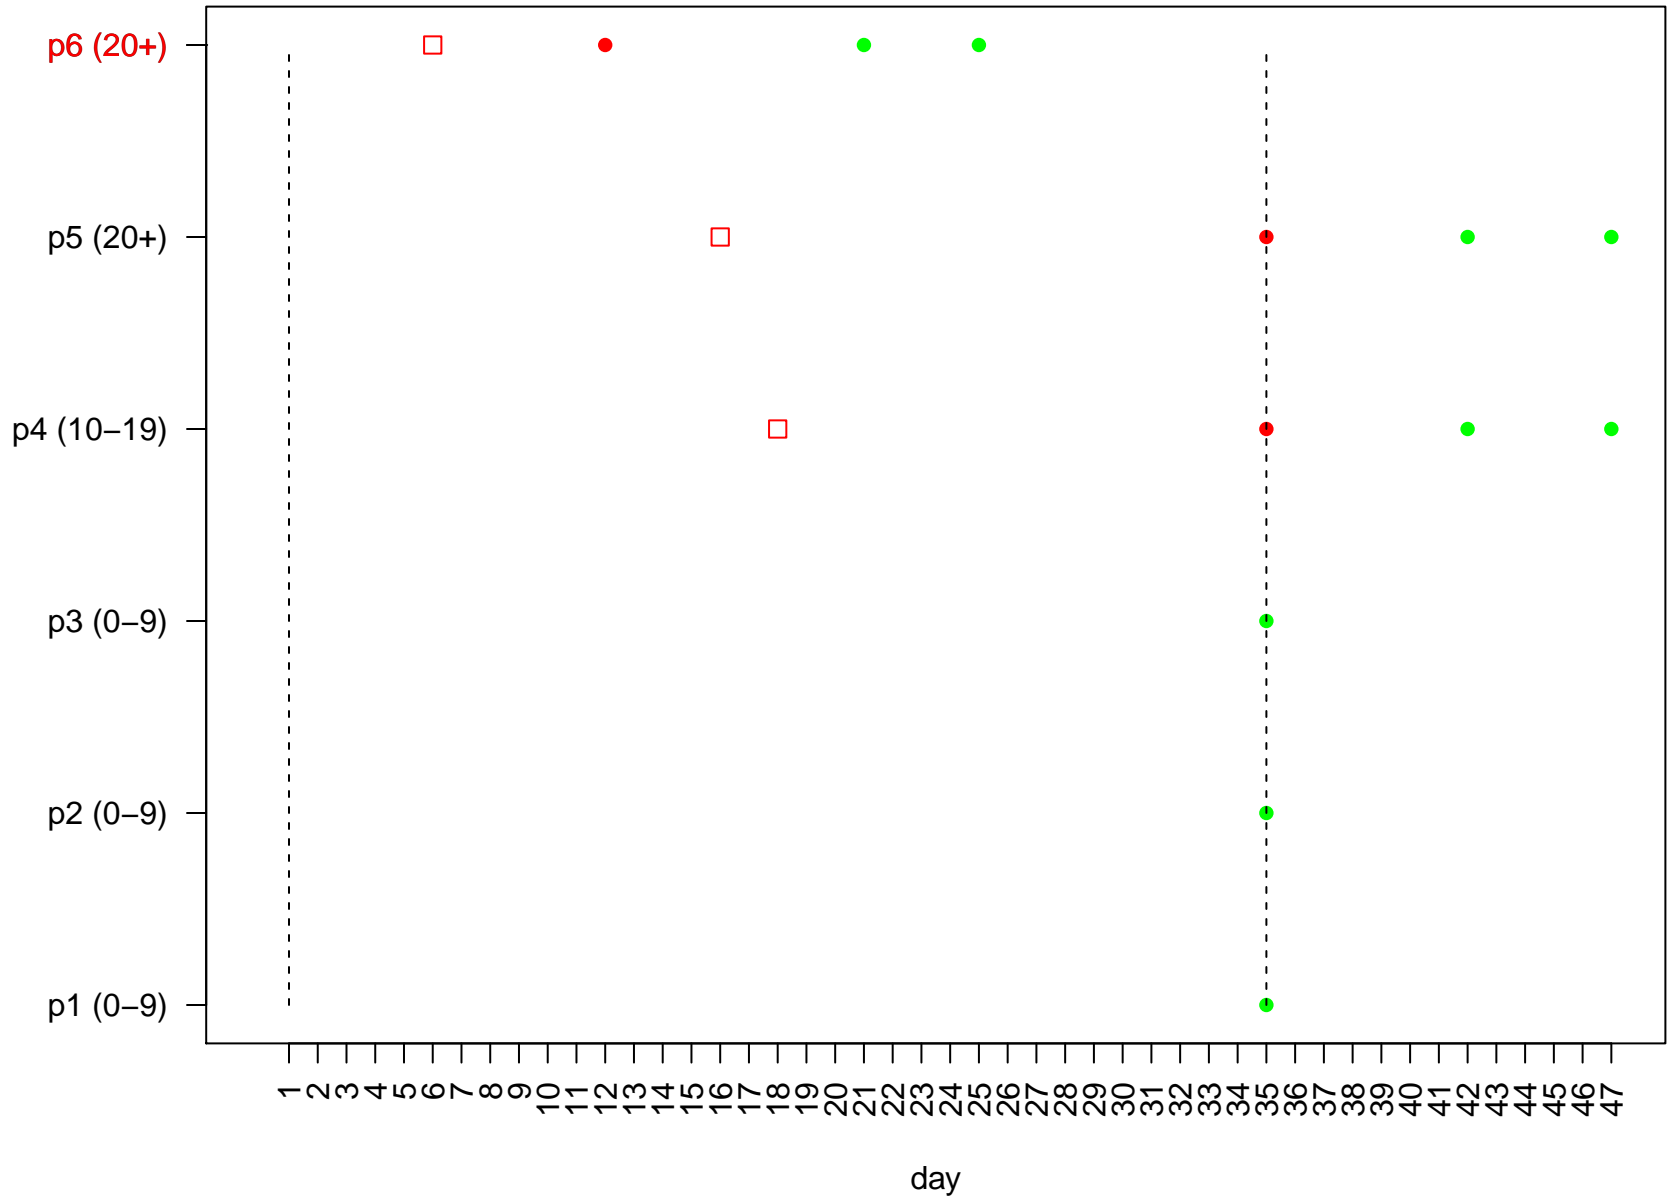

# Household 409

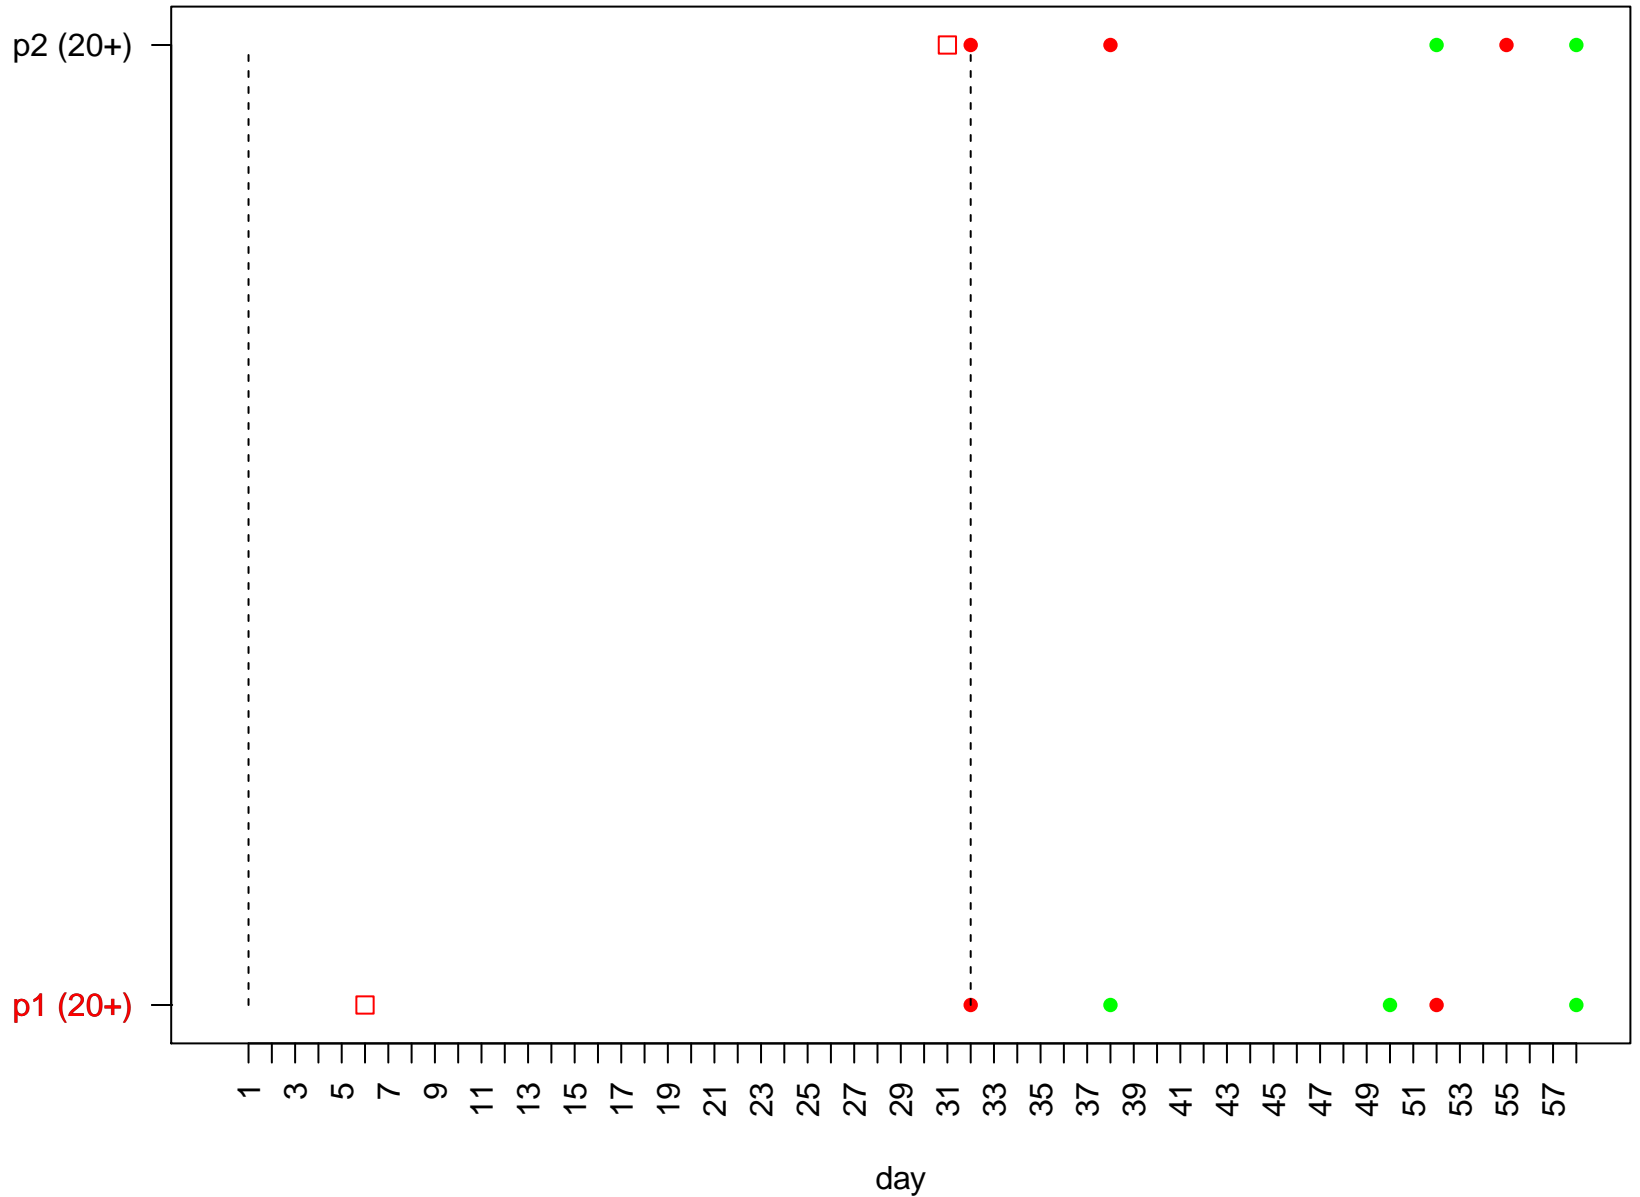

# Household 410

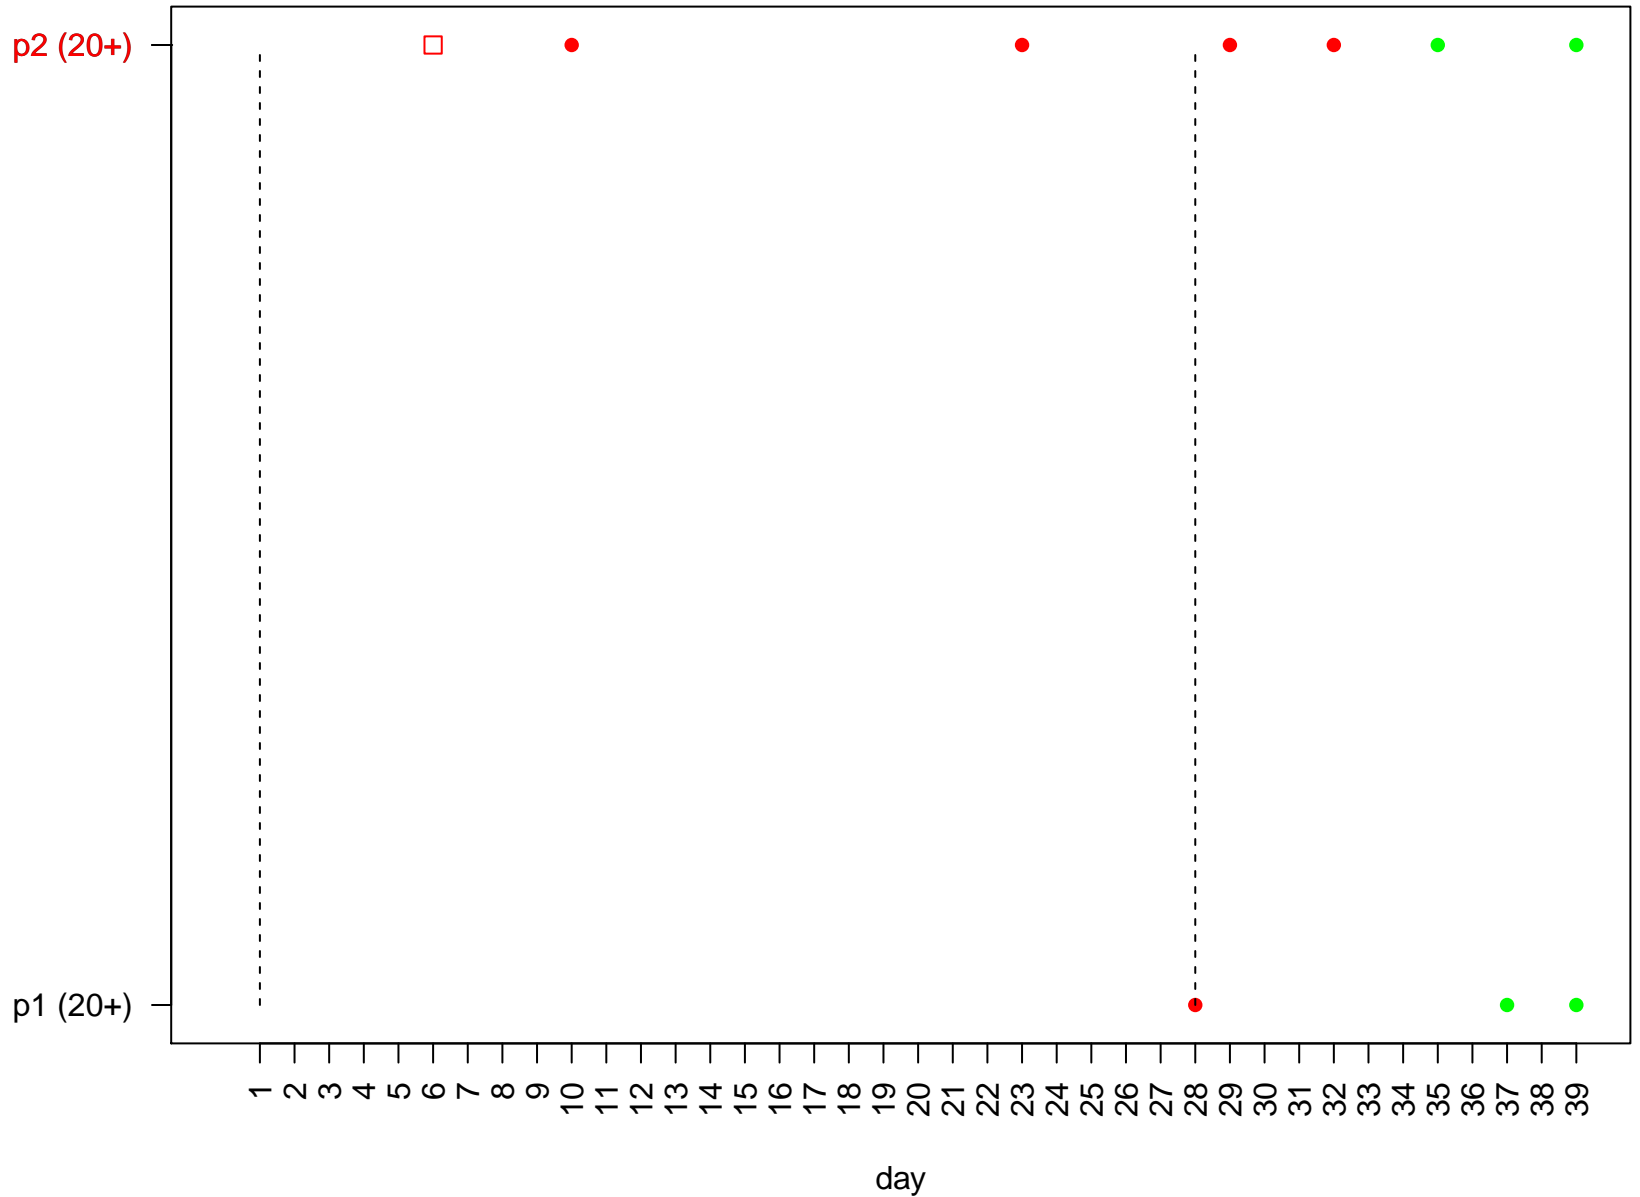

# Household 411

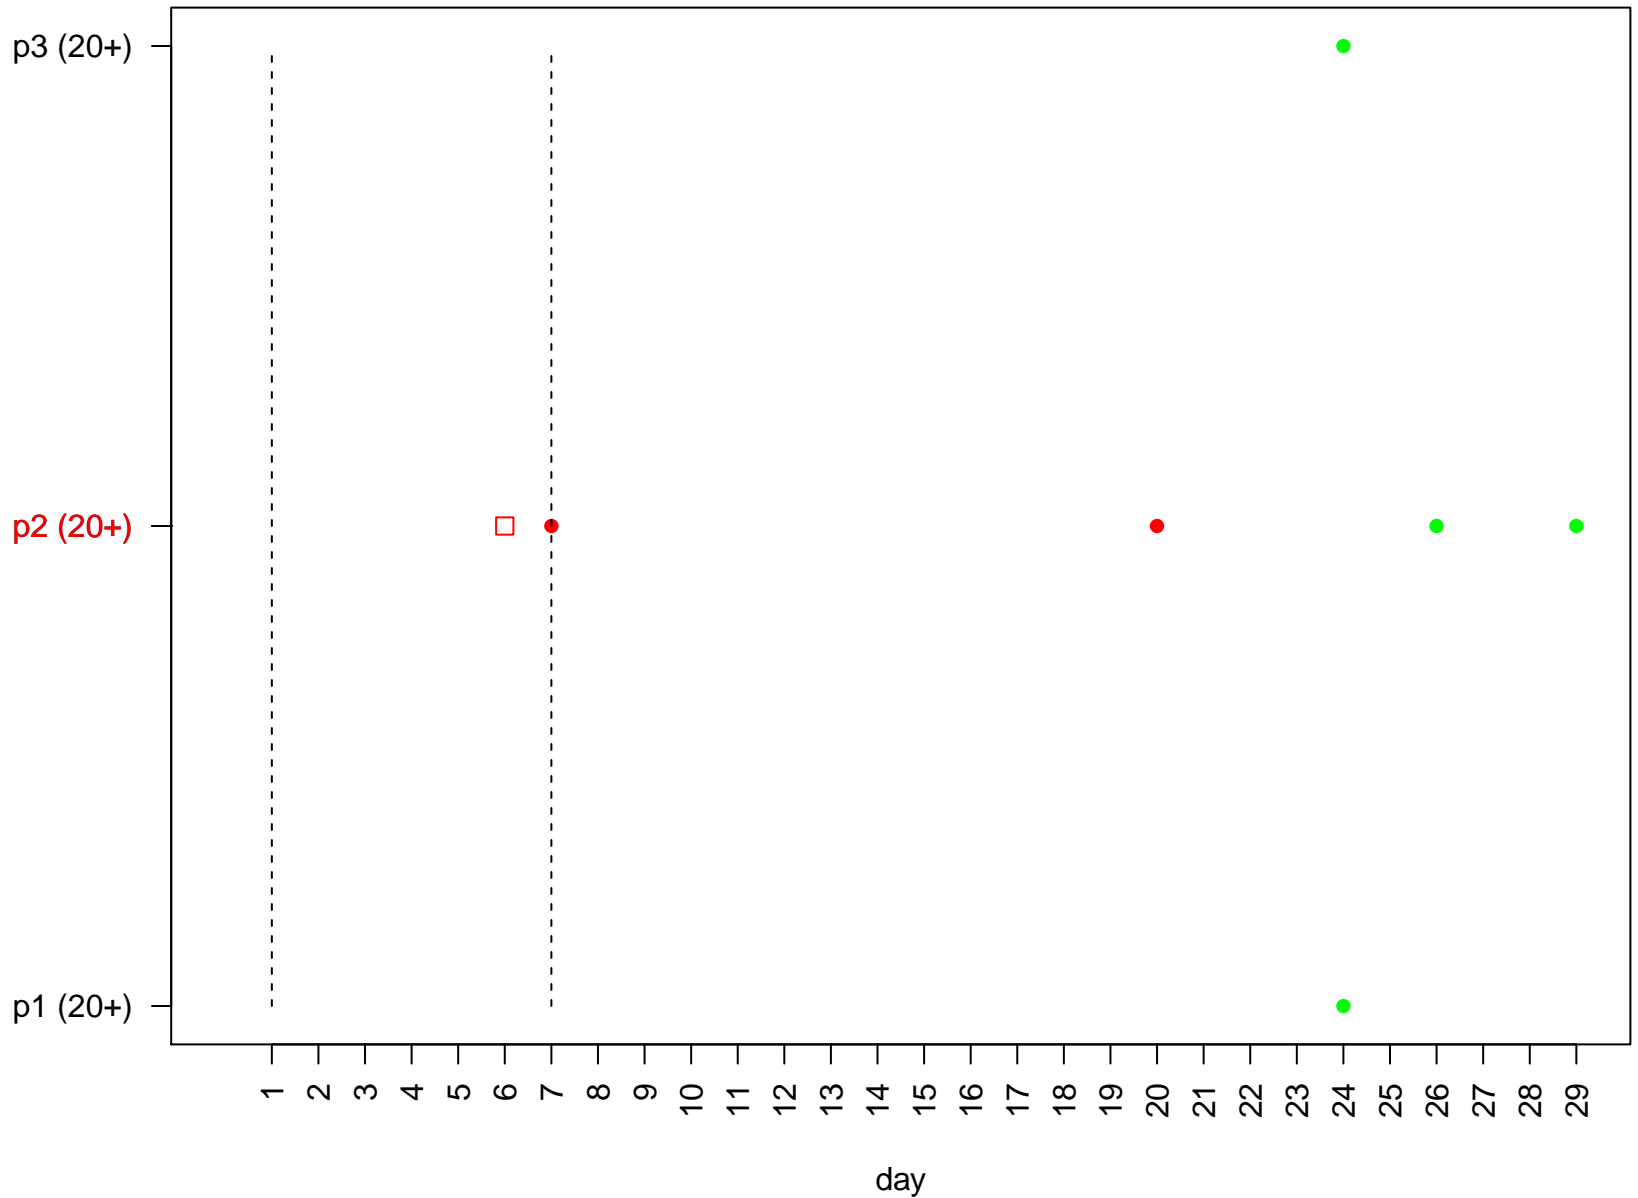

# Household 413

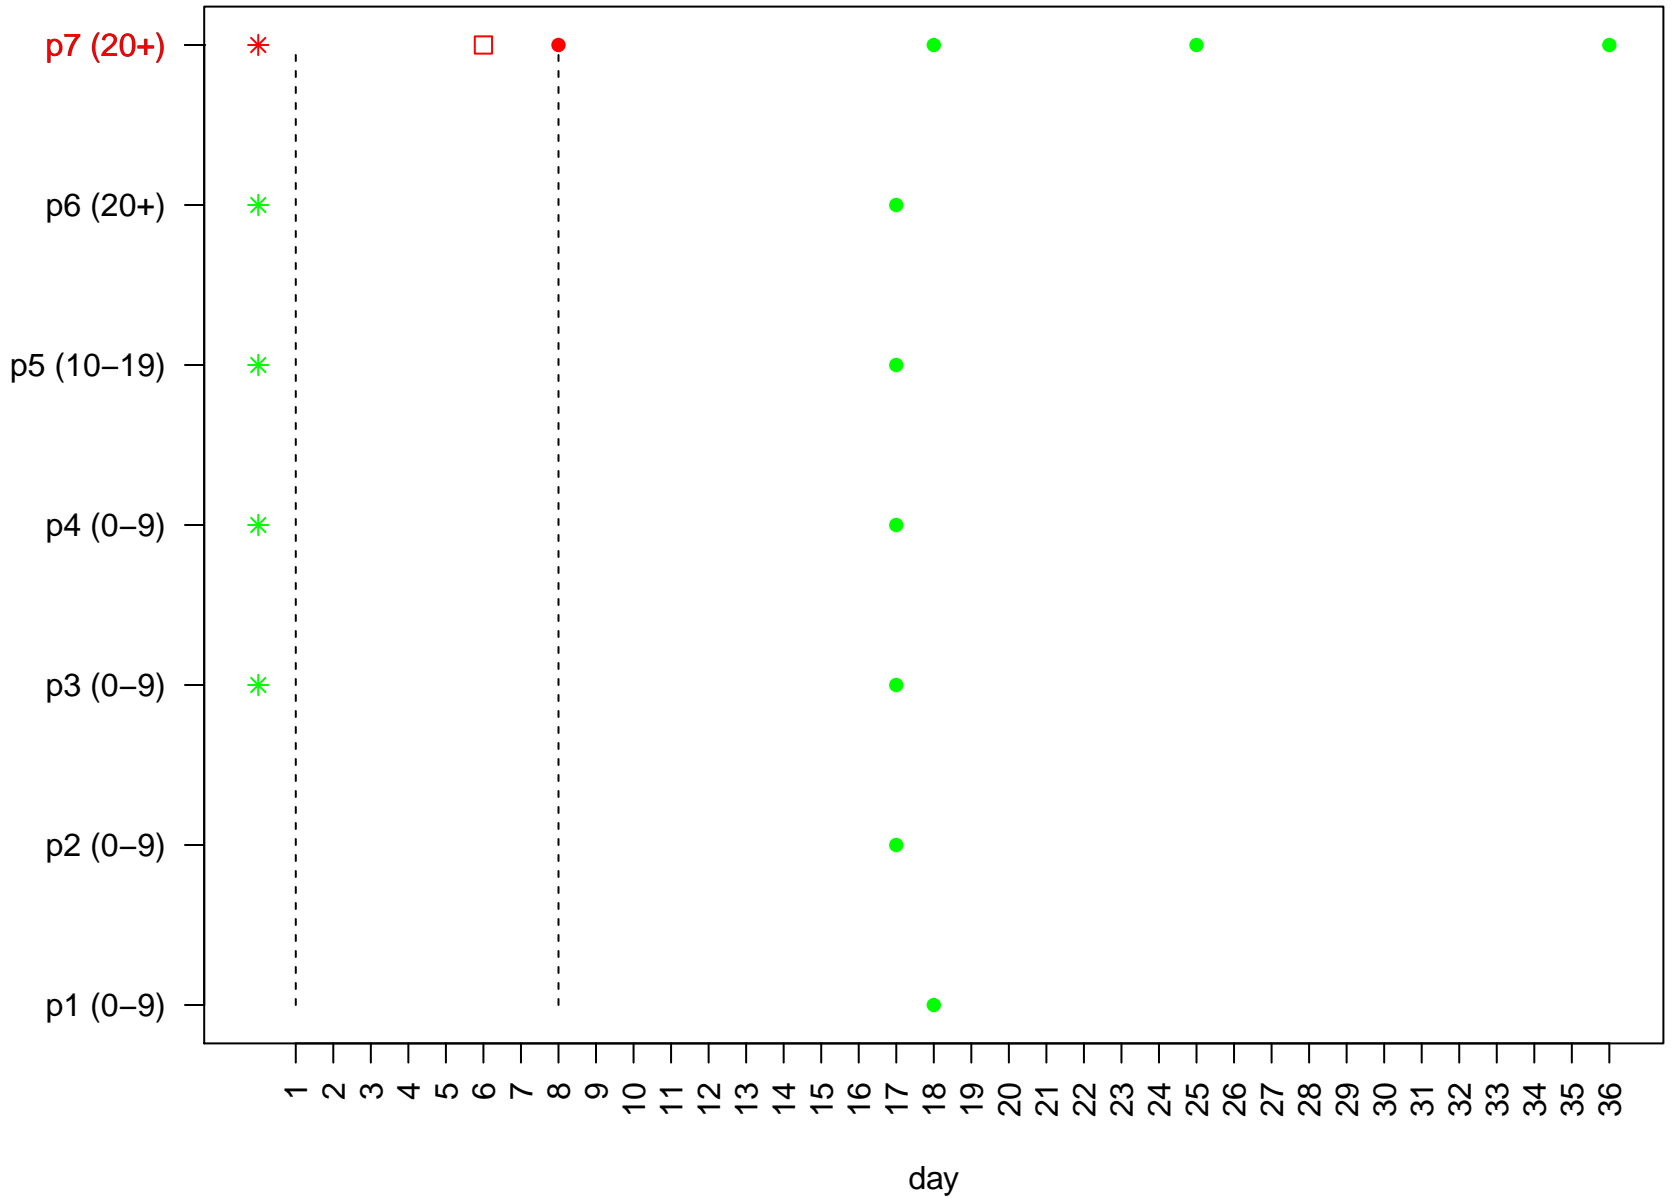

# Household 414

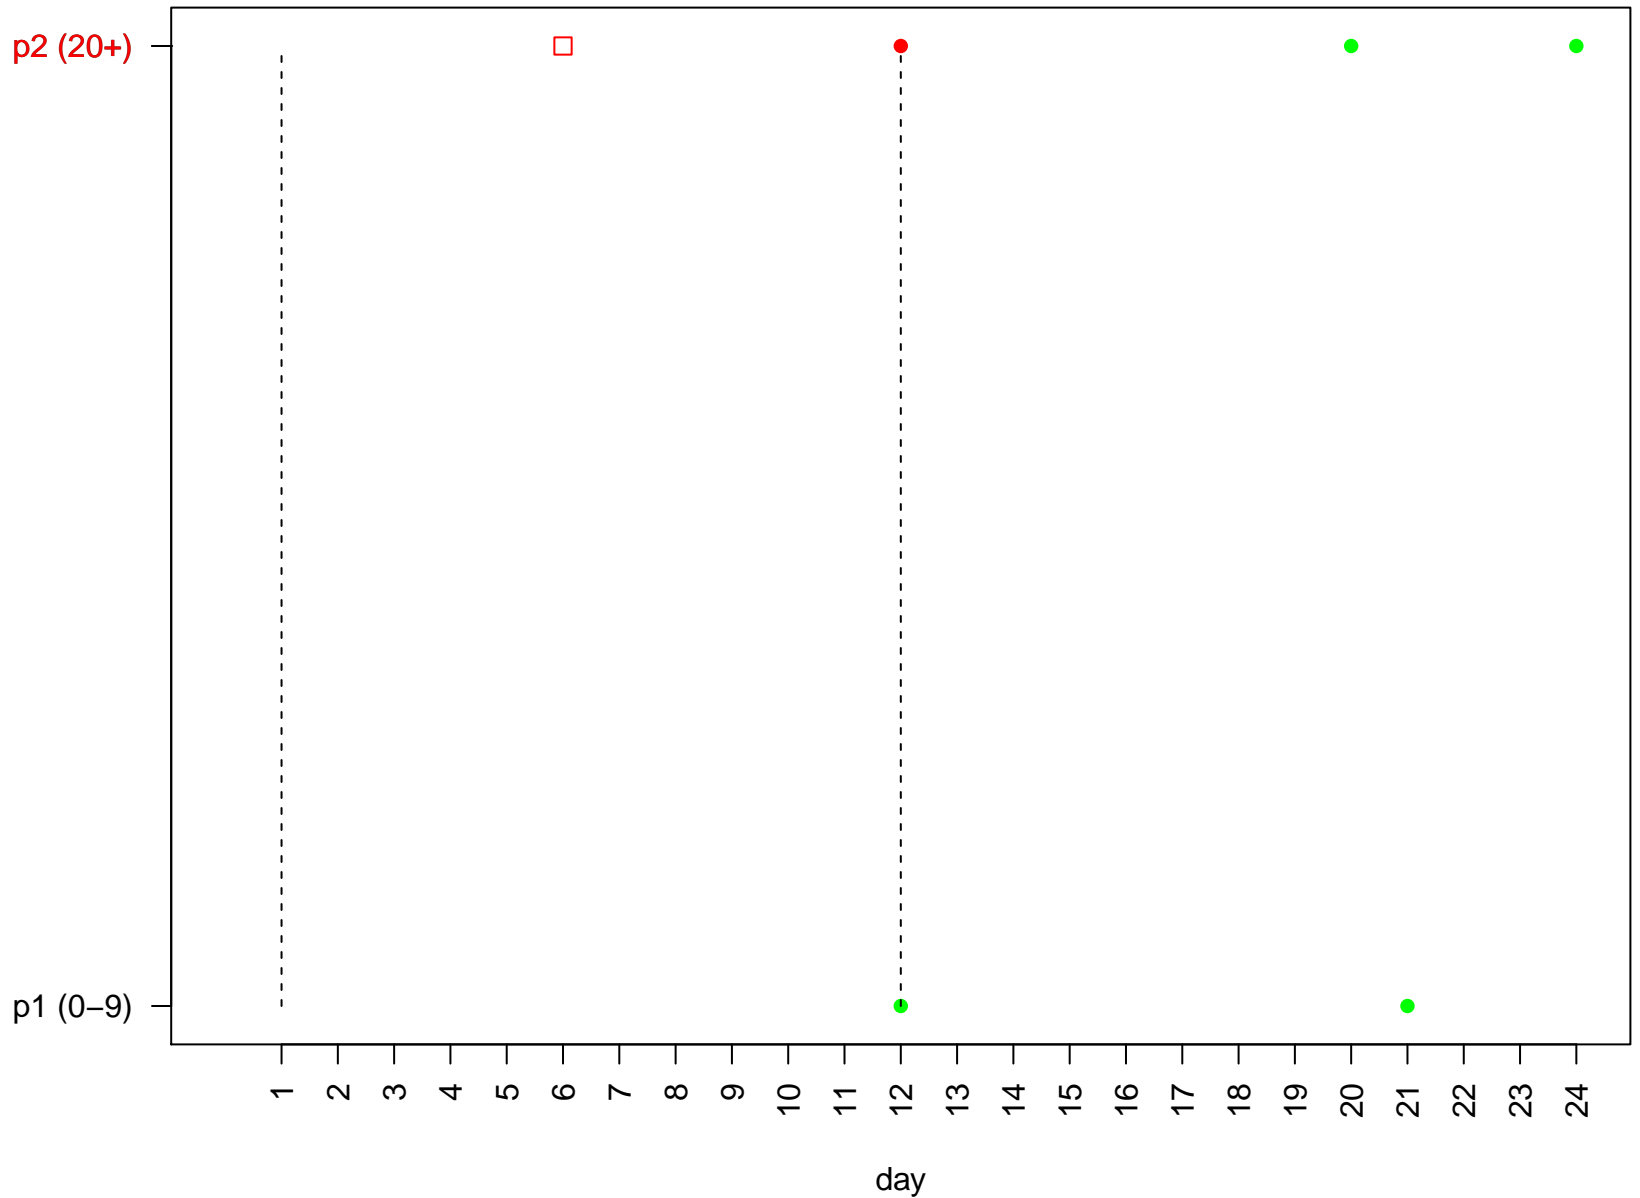

# Household 415

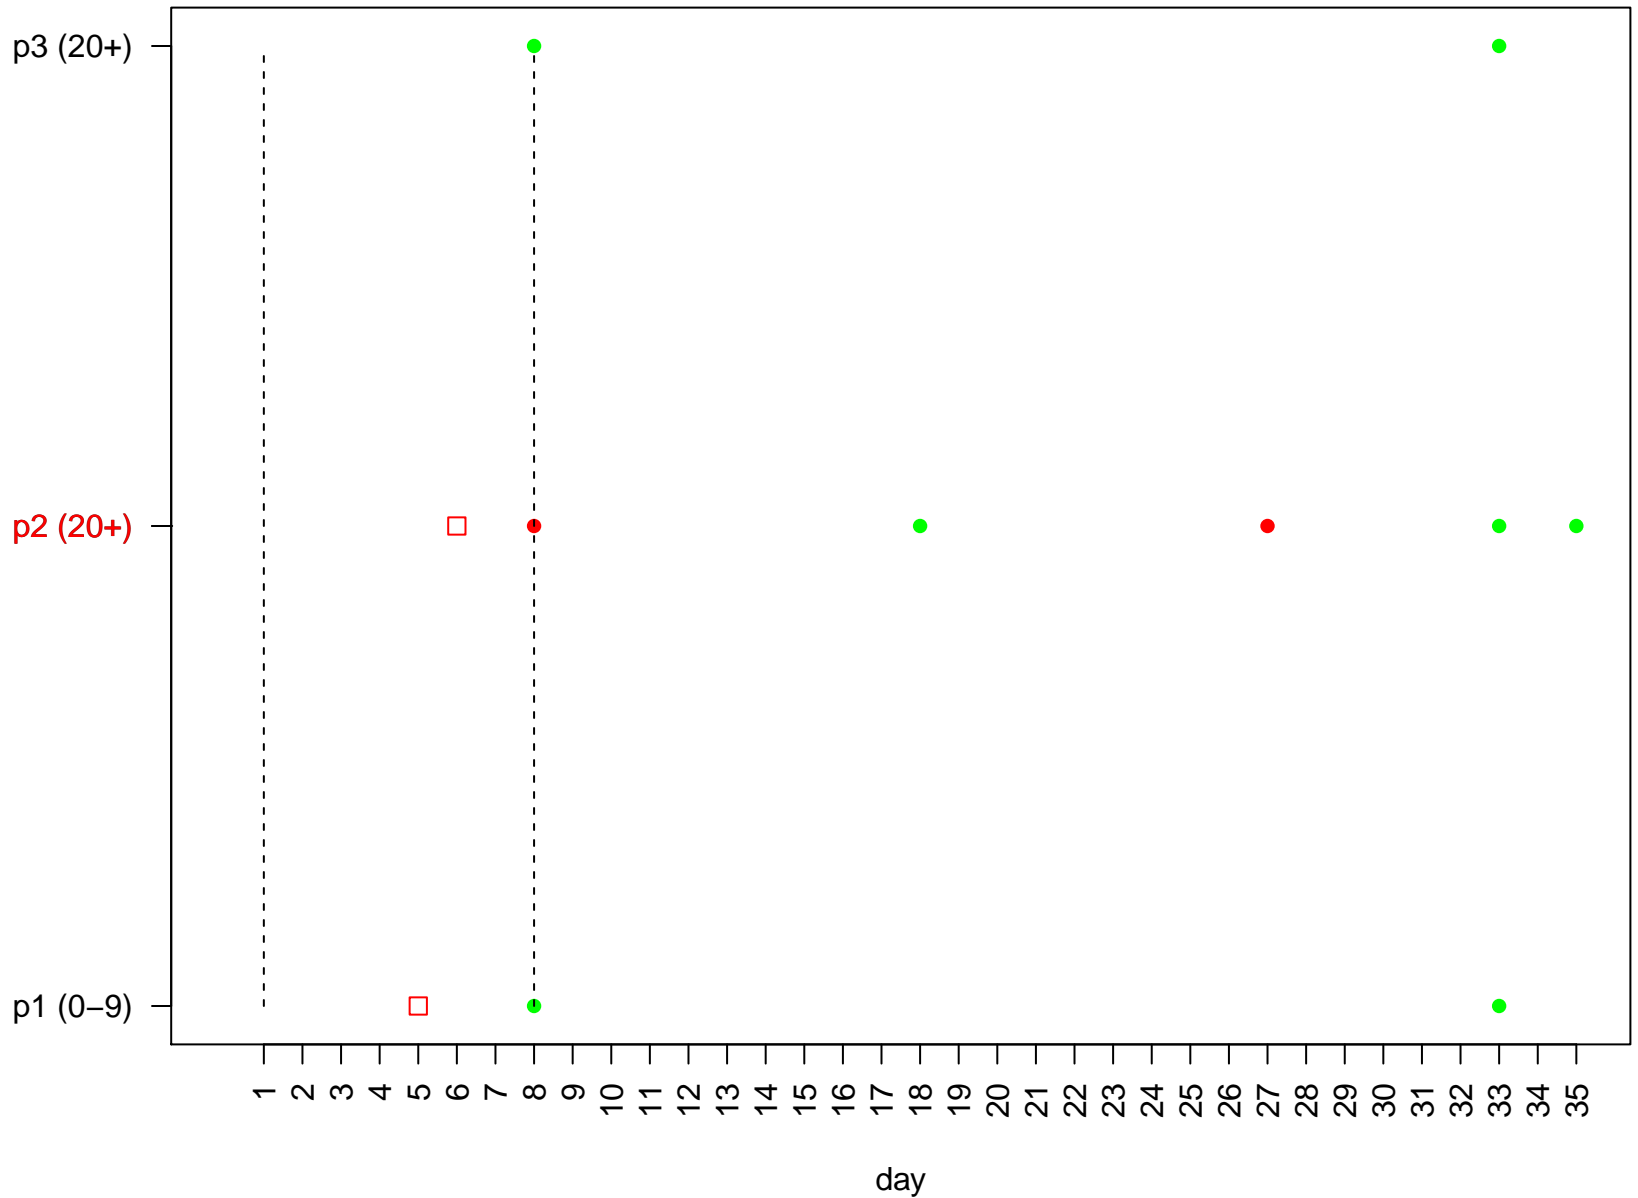

# Household 416

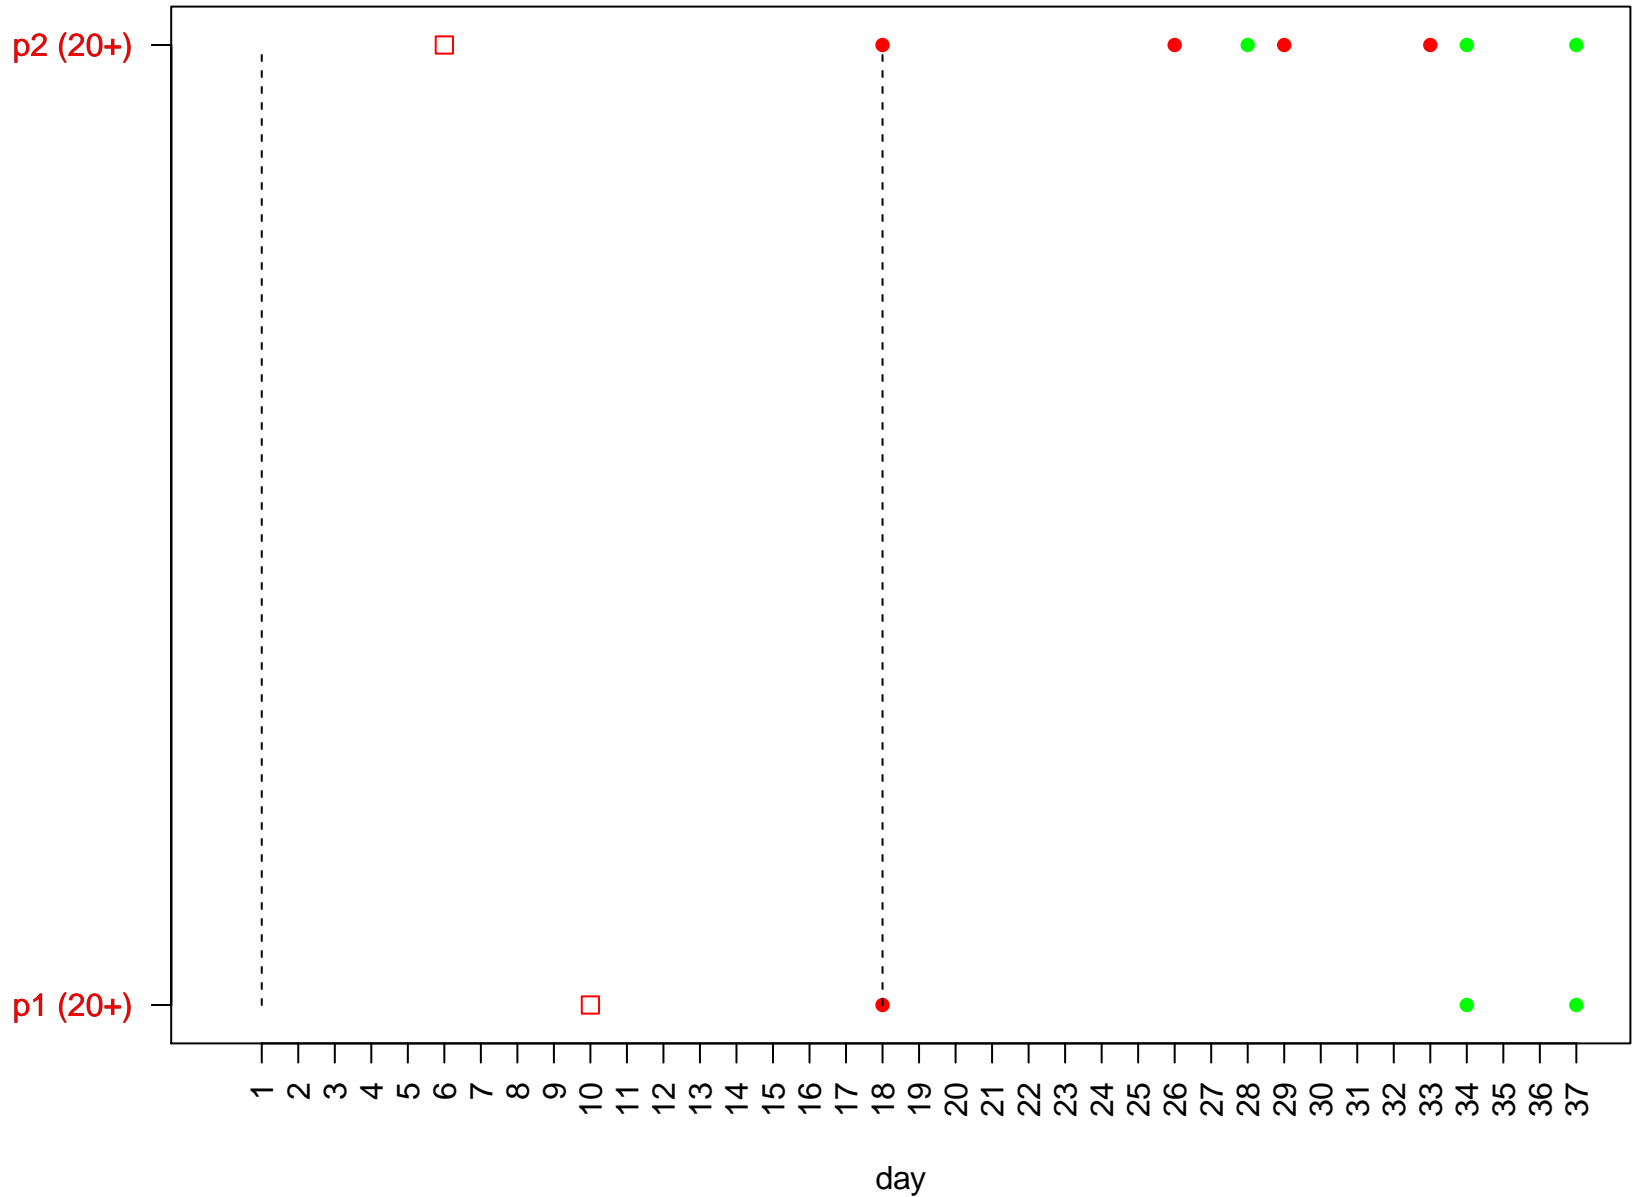







# Household 419

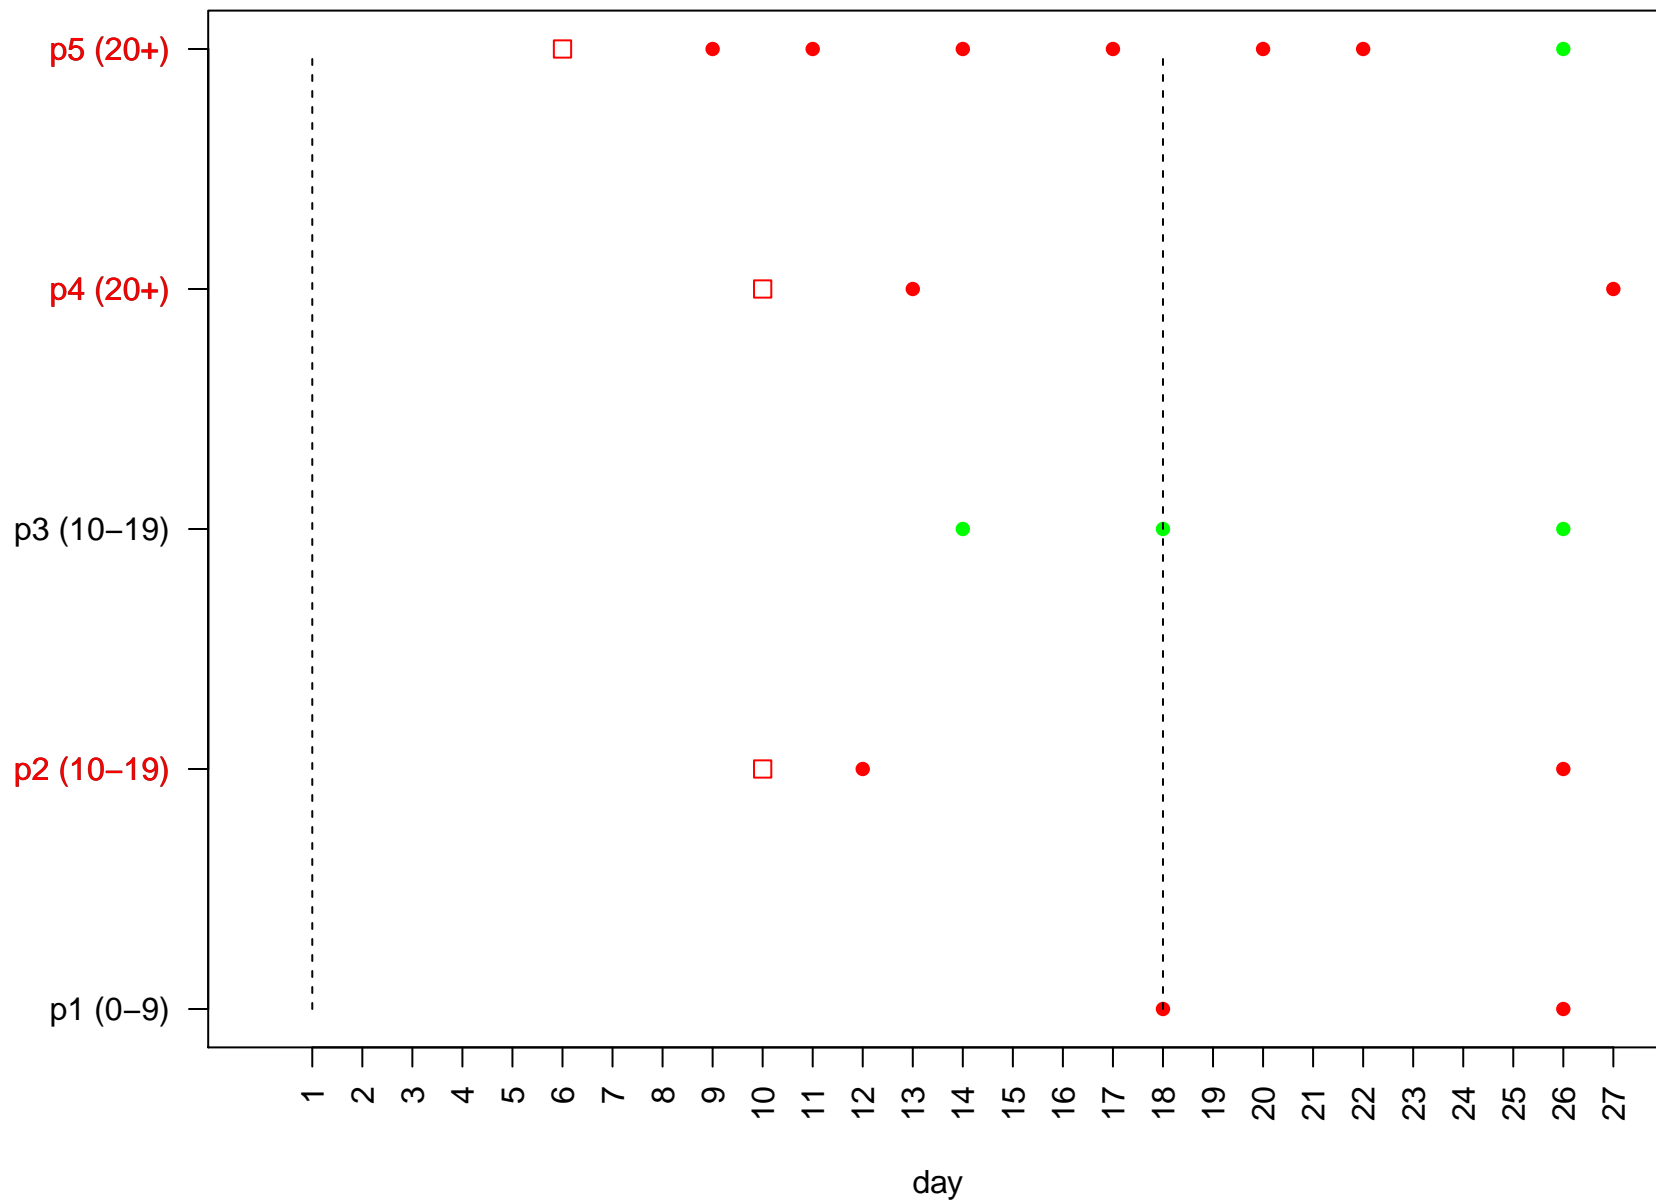

# Household 420

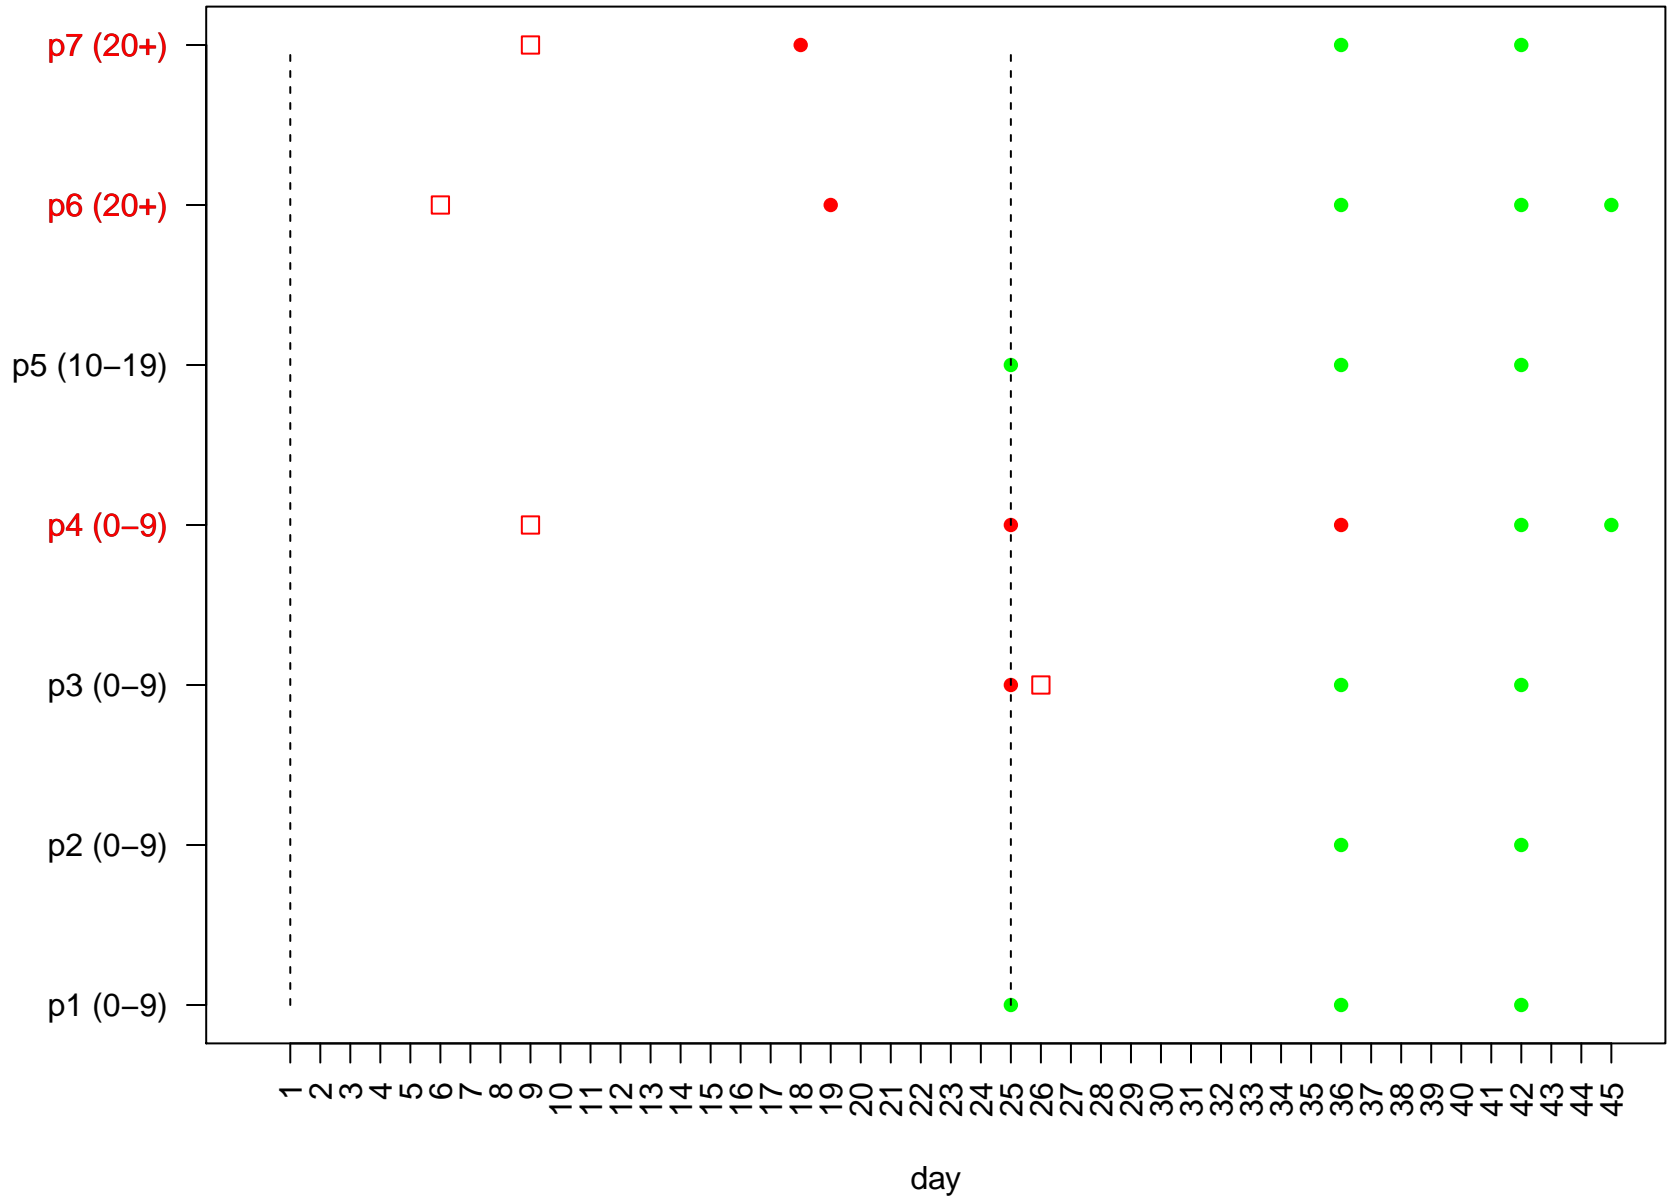

# Household 421

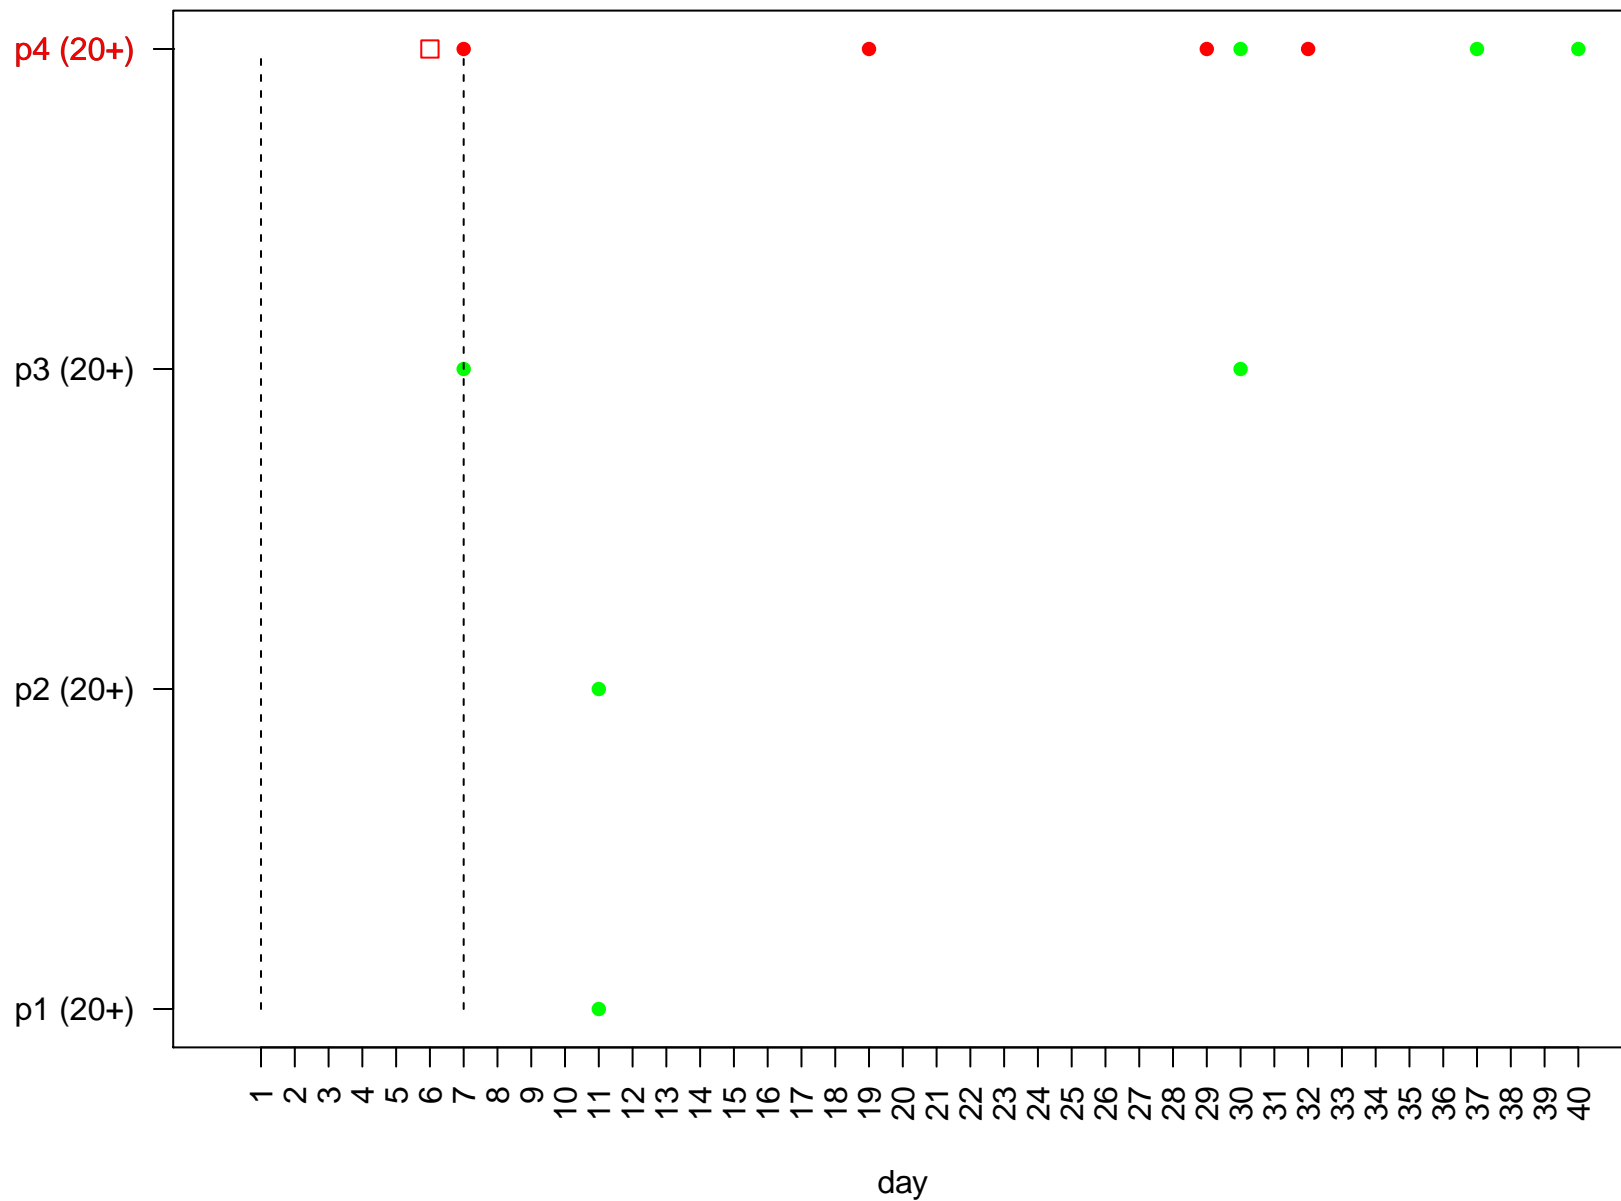

# Household 422

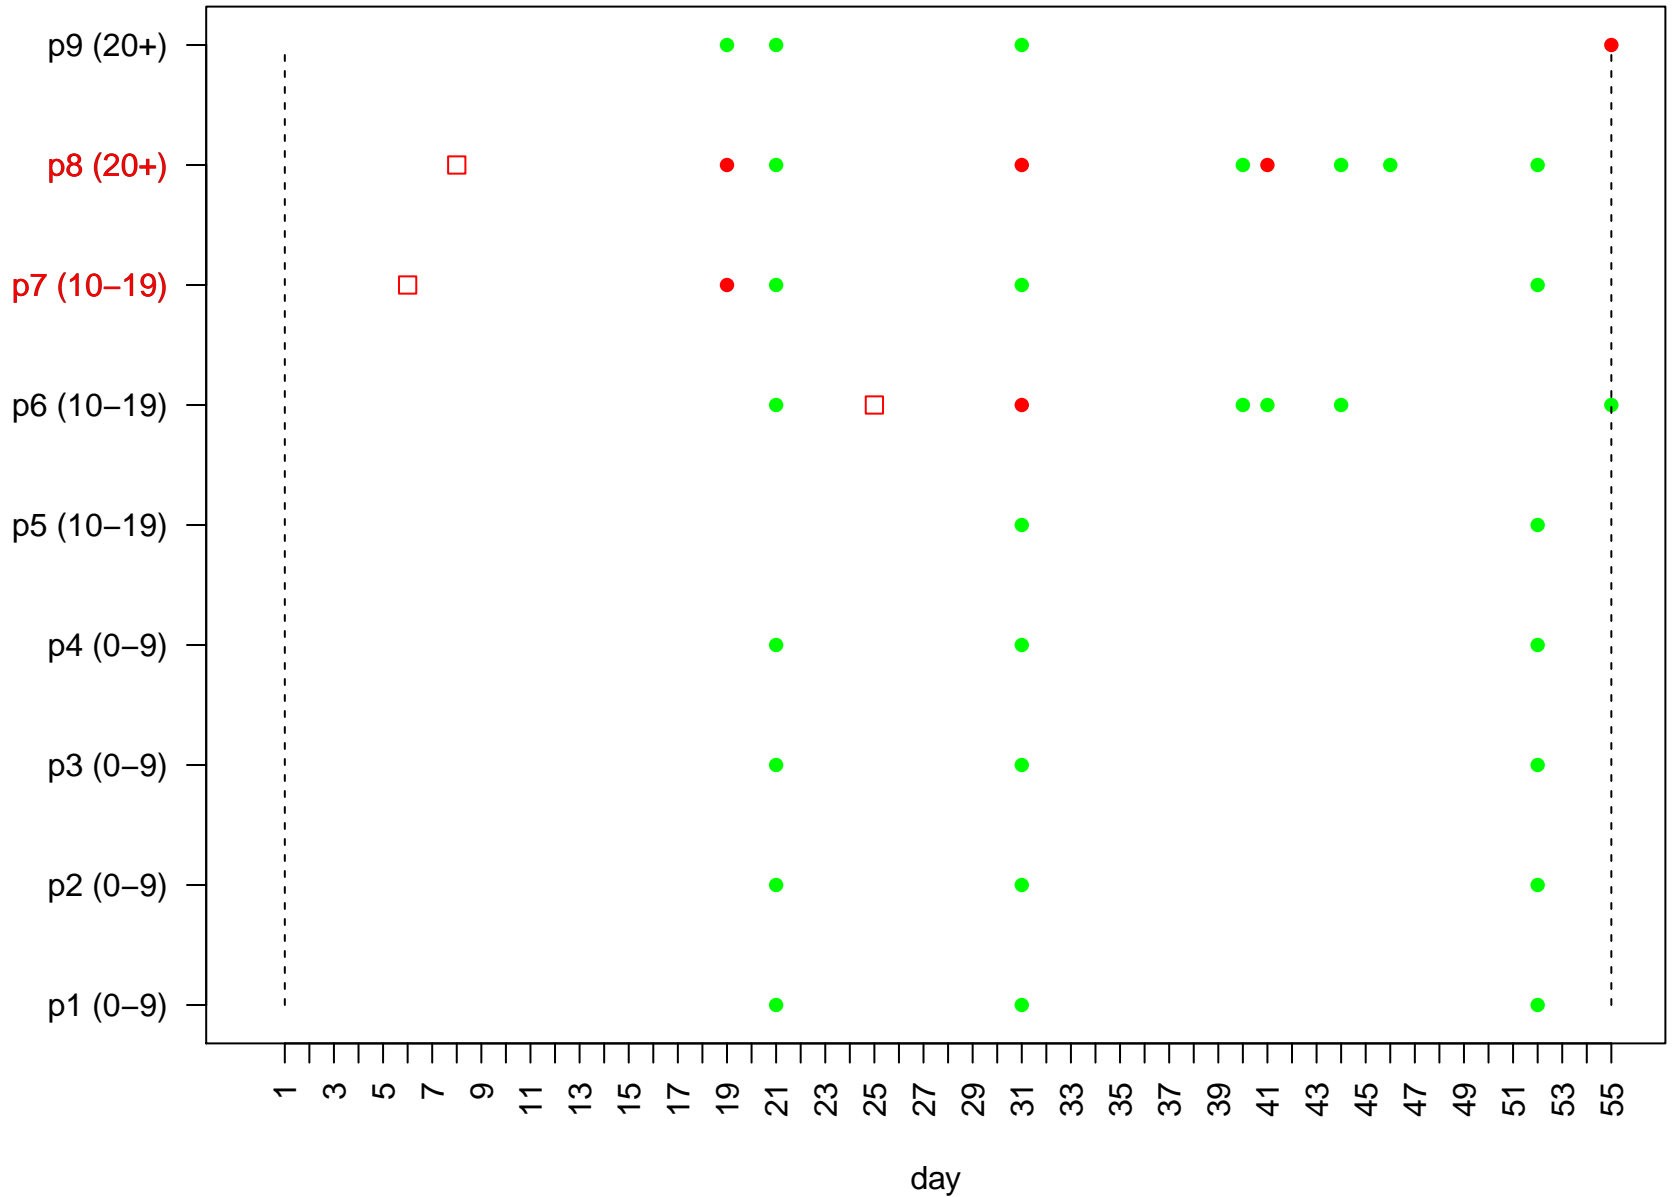



# Household 424

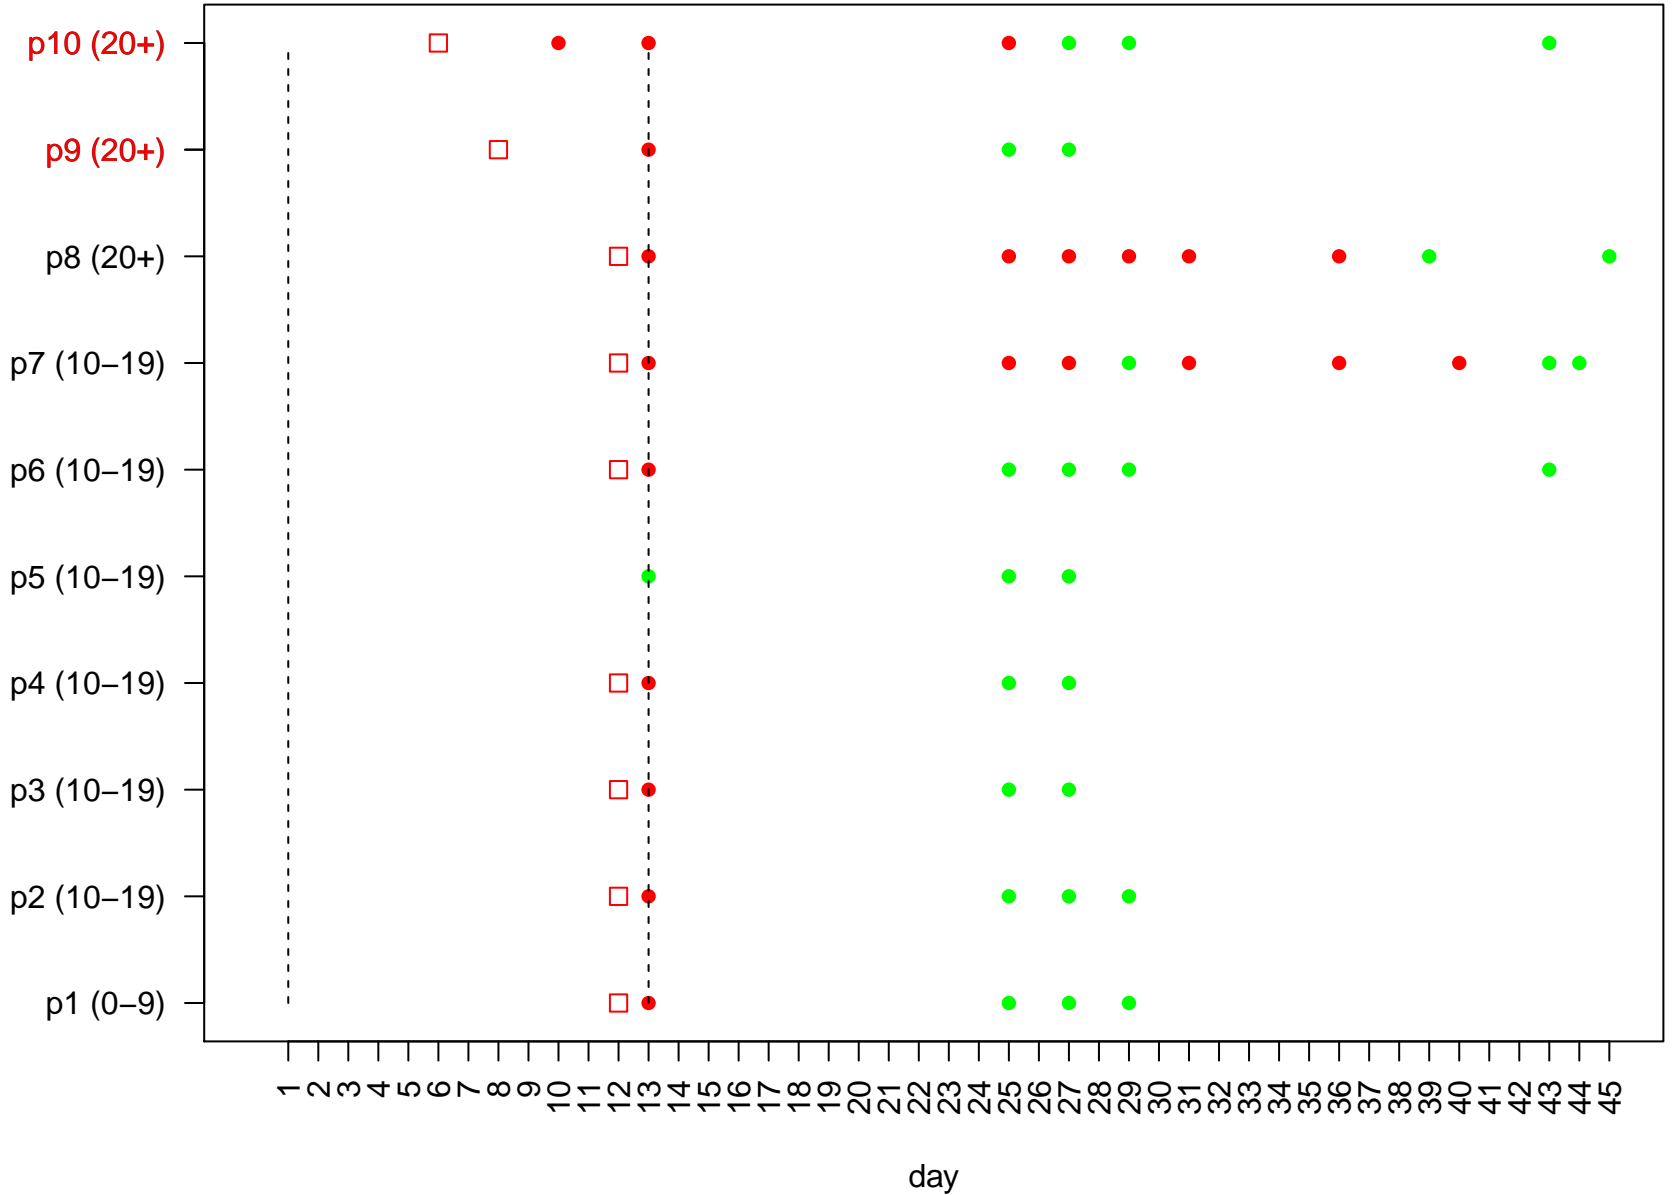



# Household 425

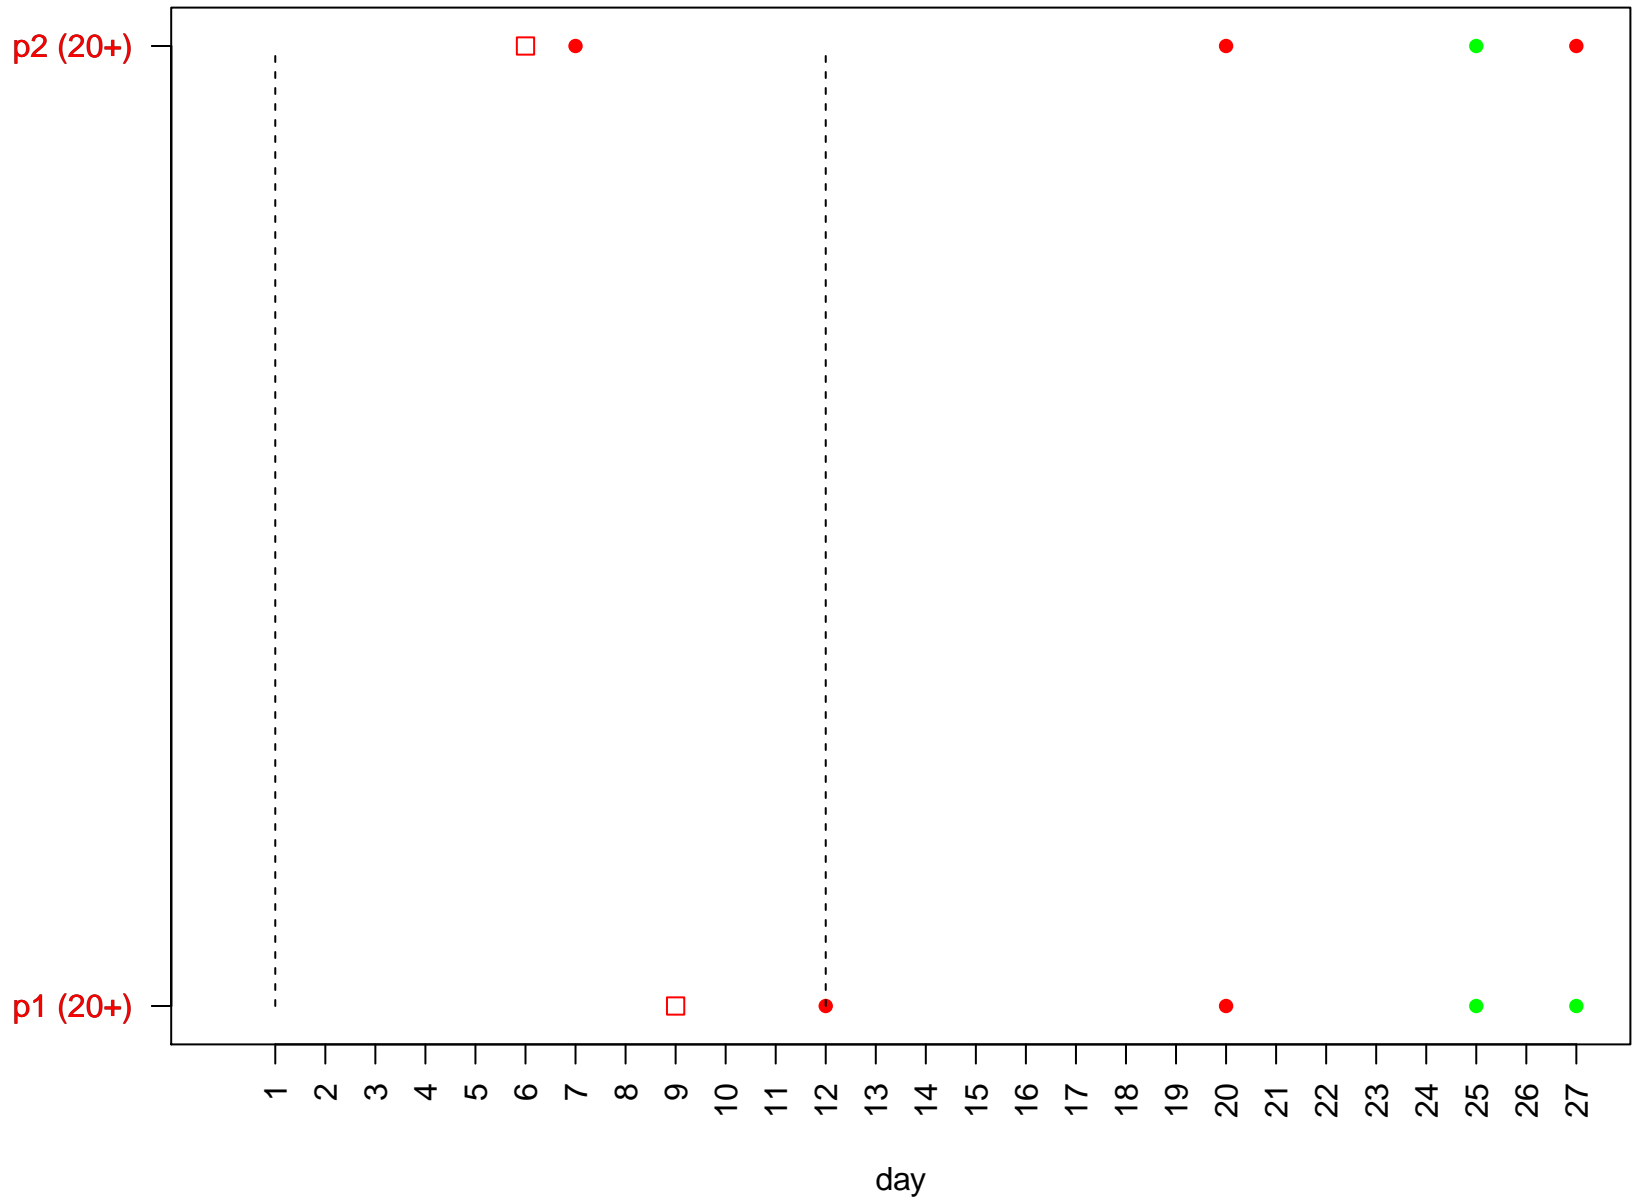

# Household 426

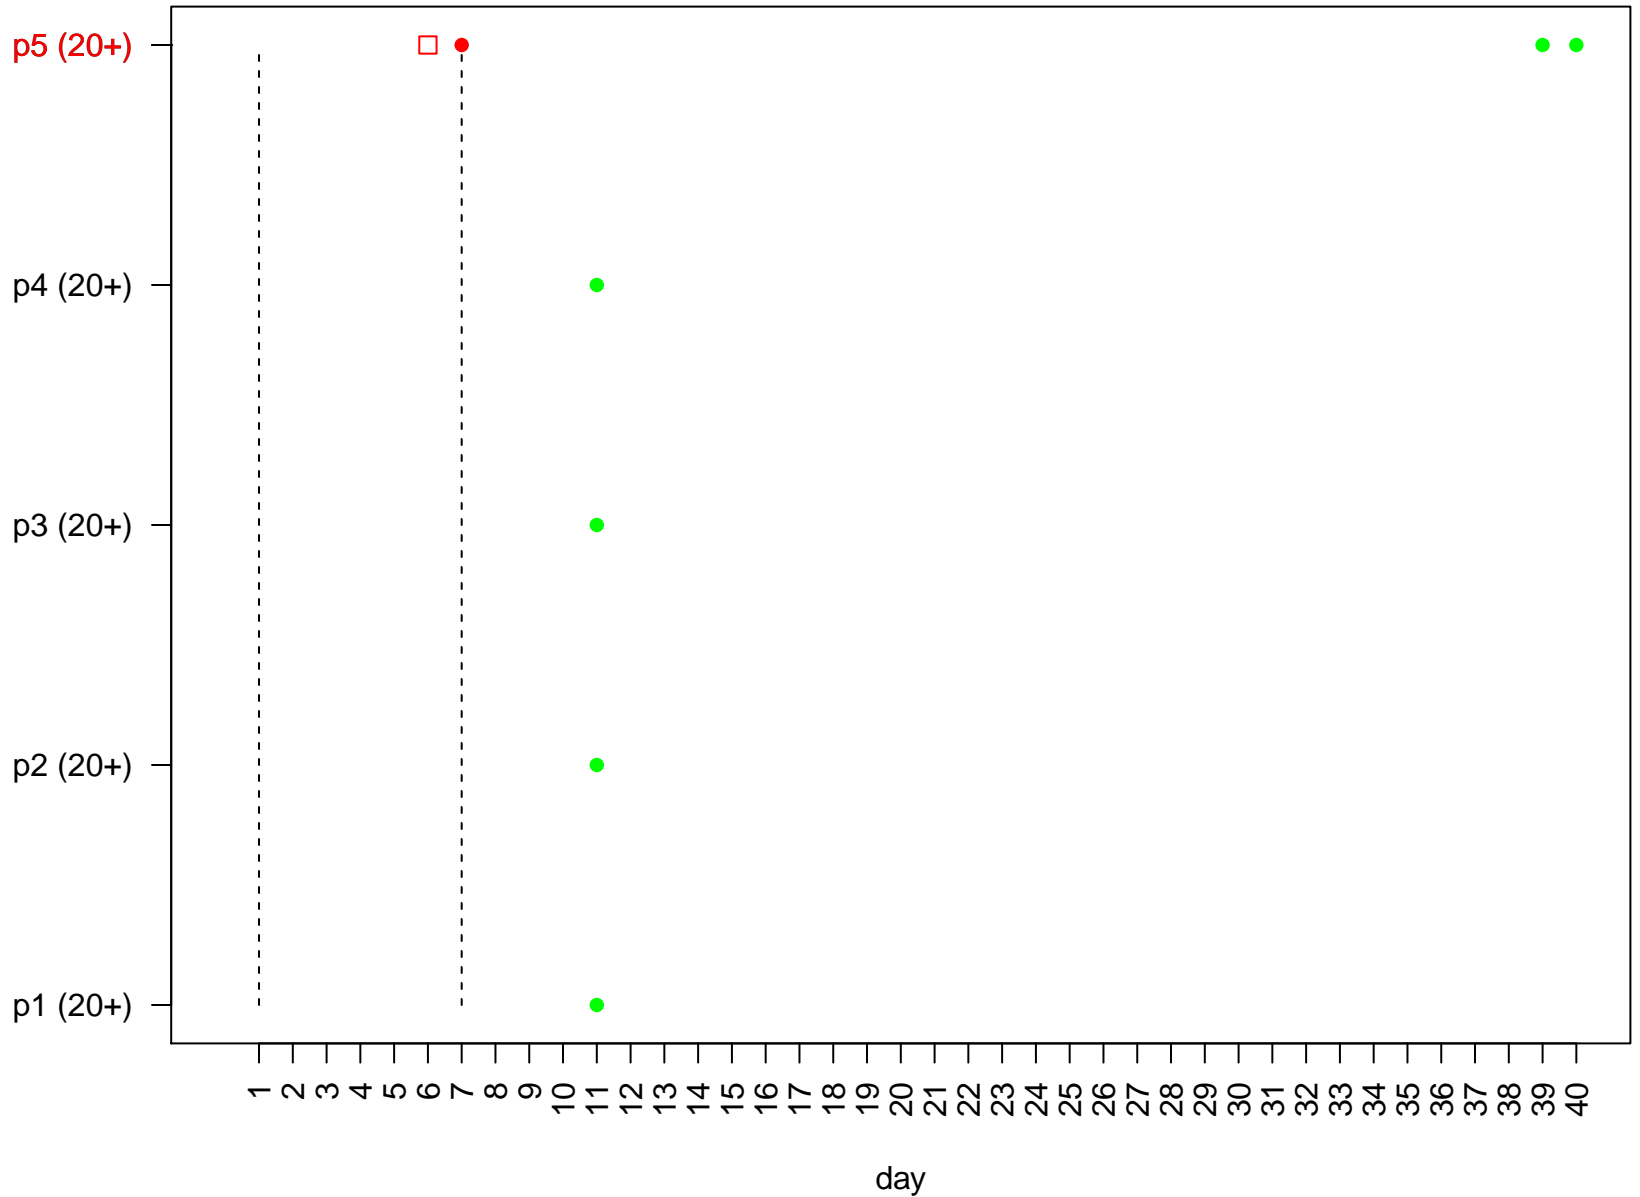

# Household 427

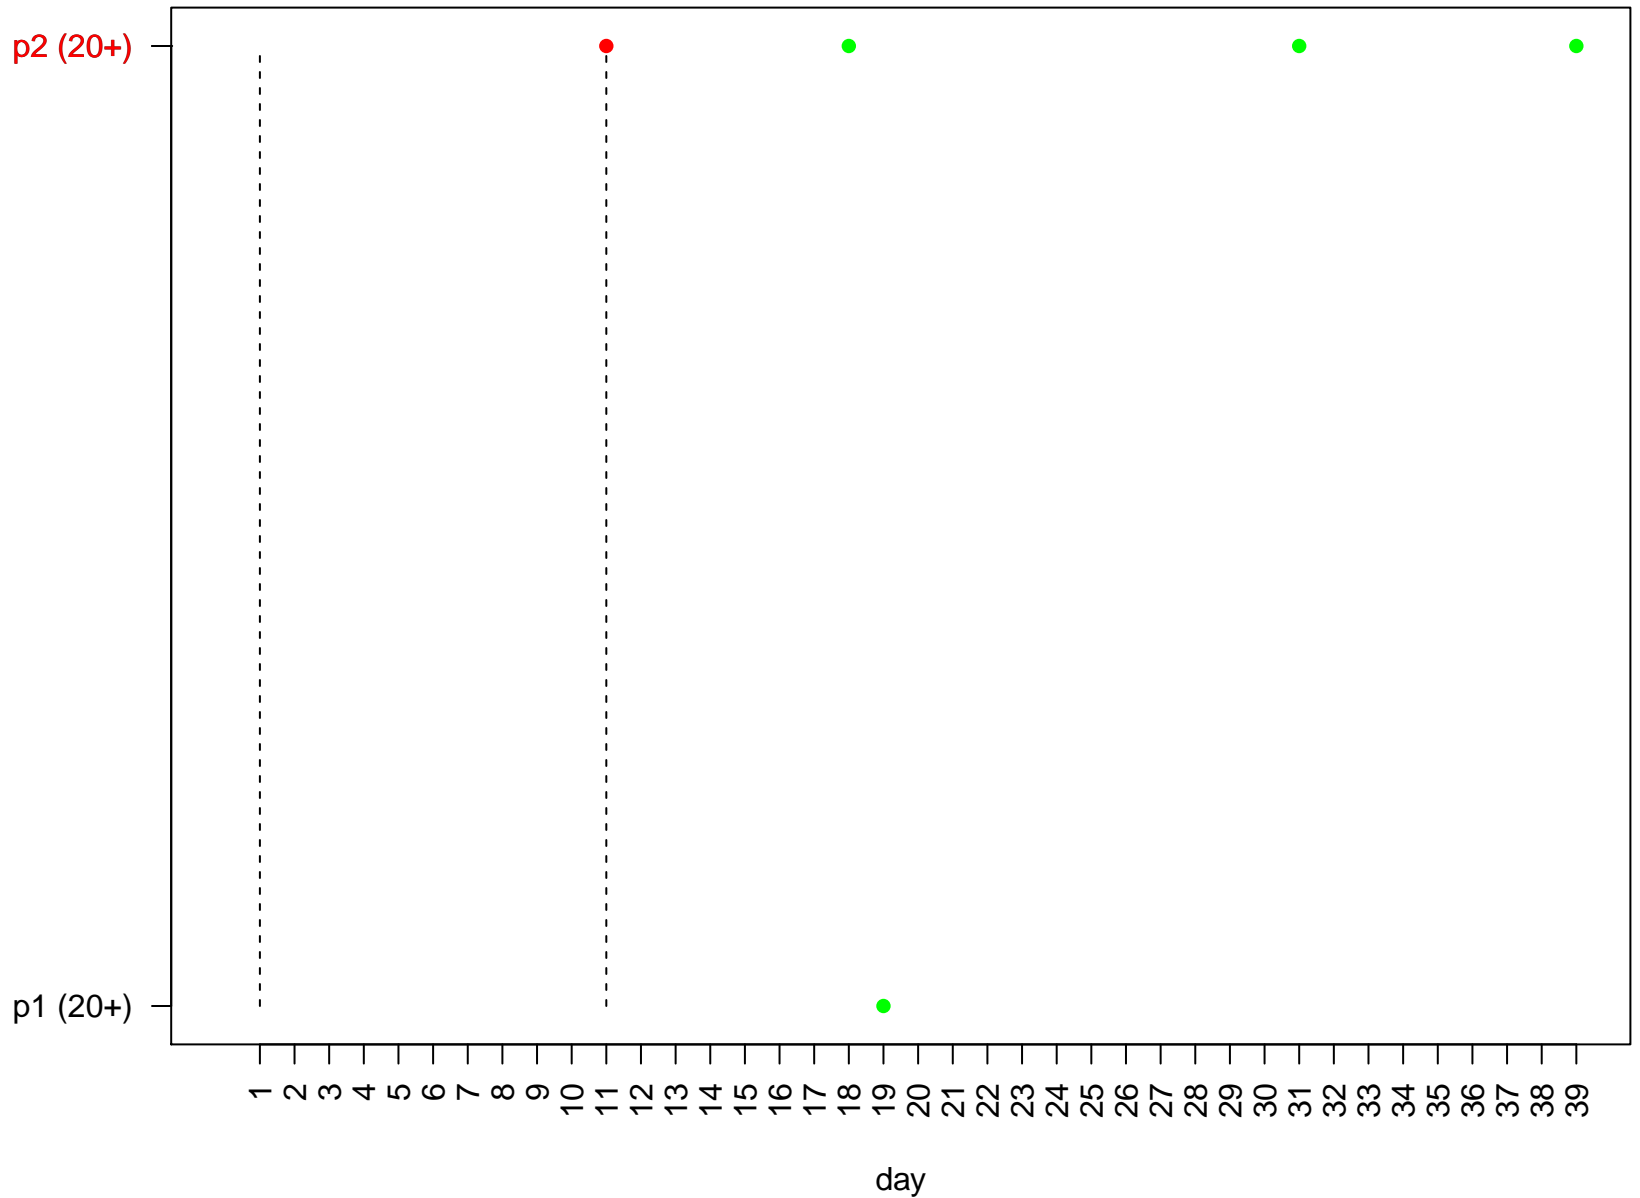

# Household 428

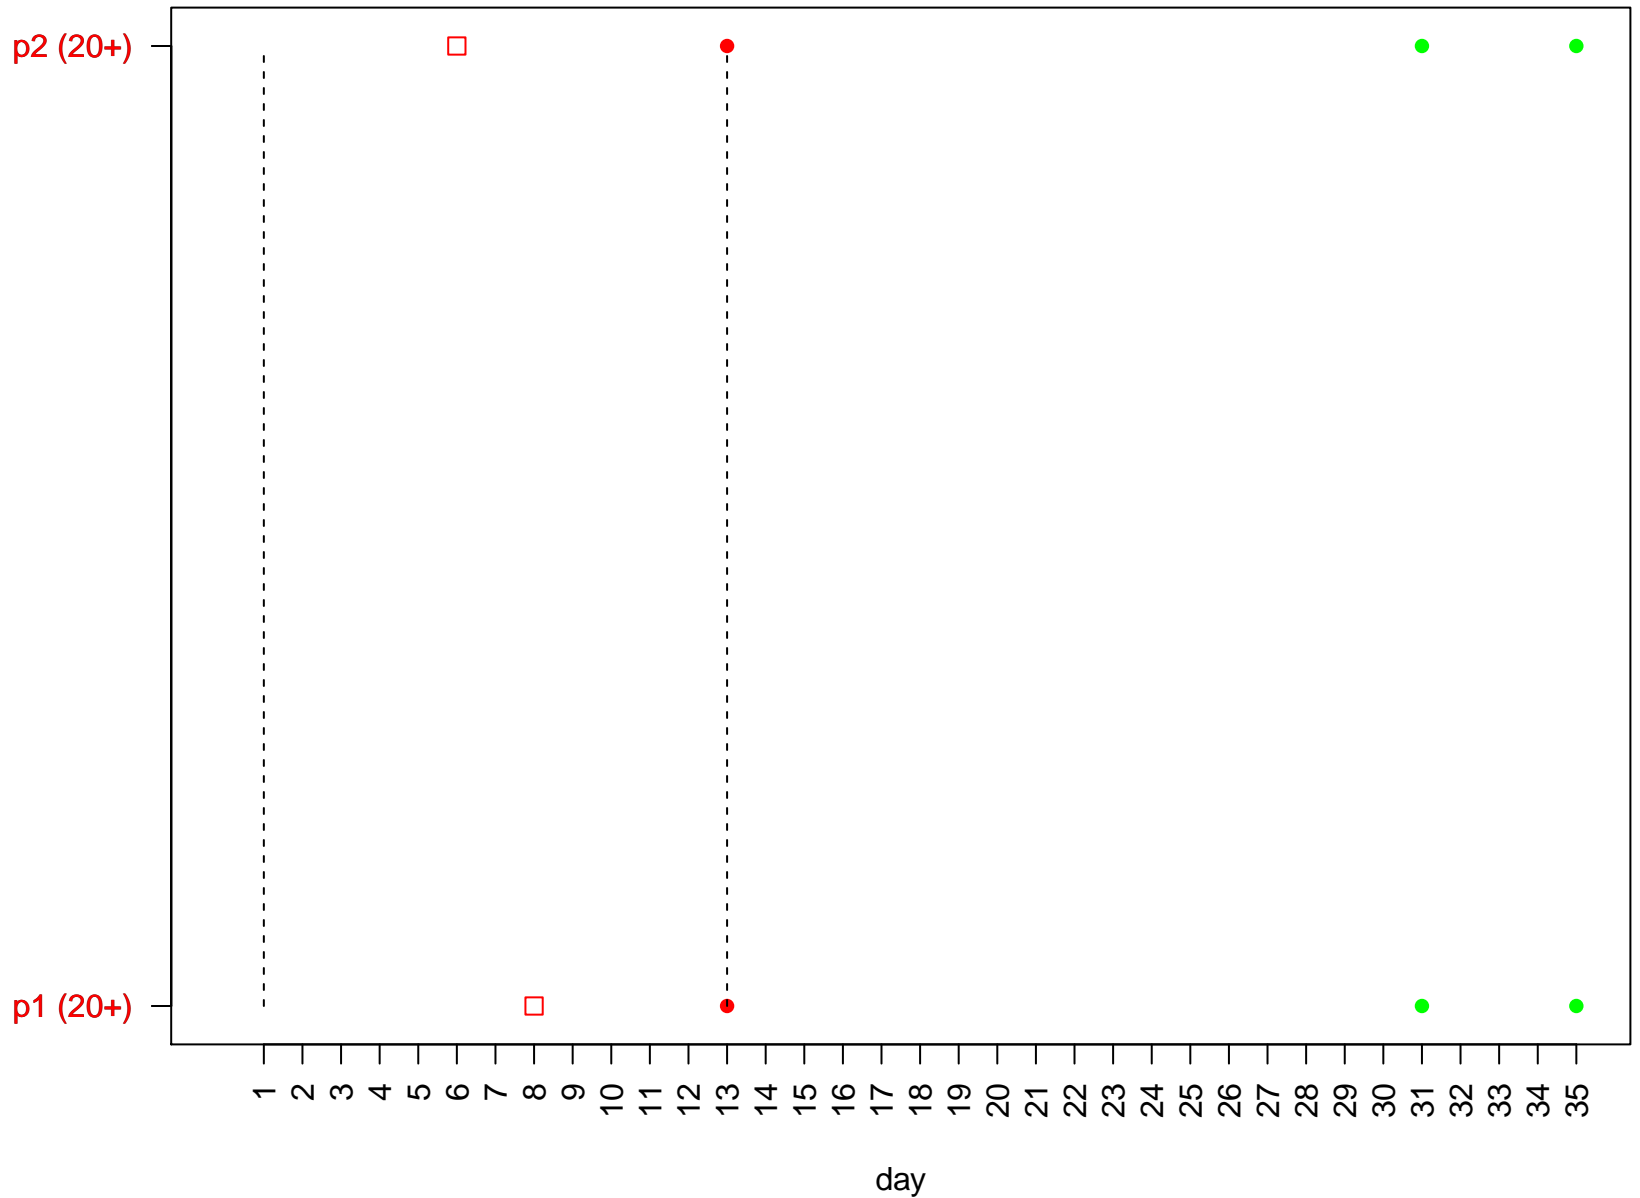

# Household 429

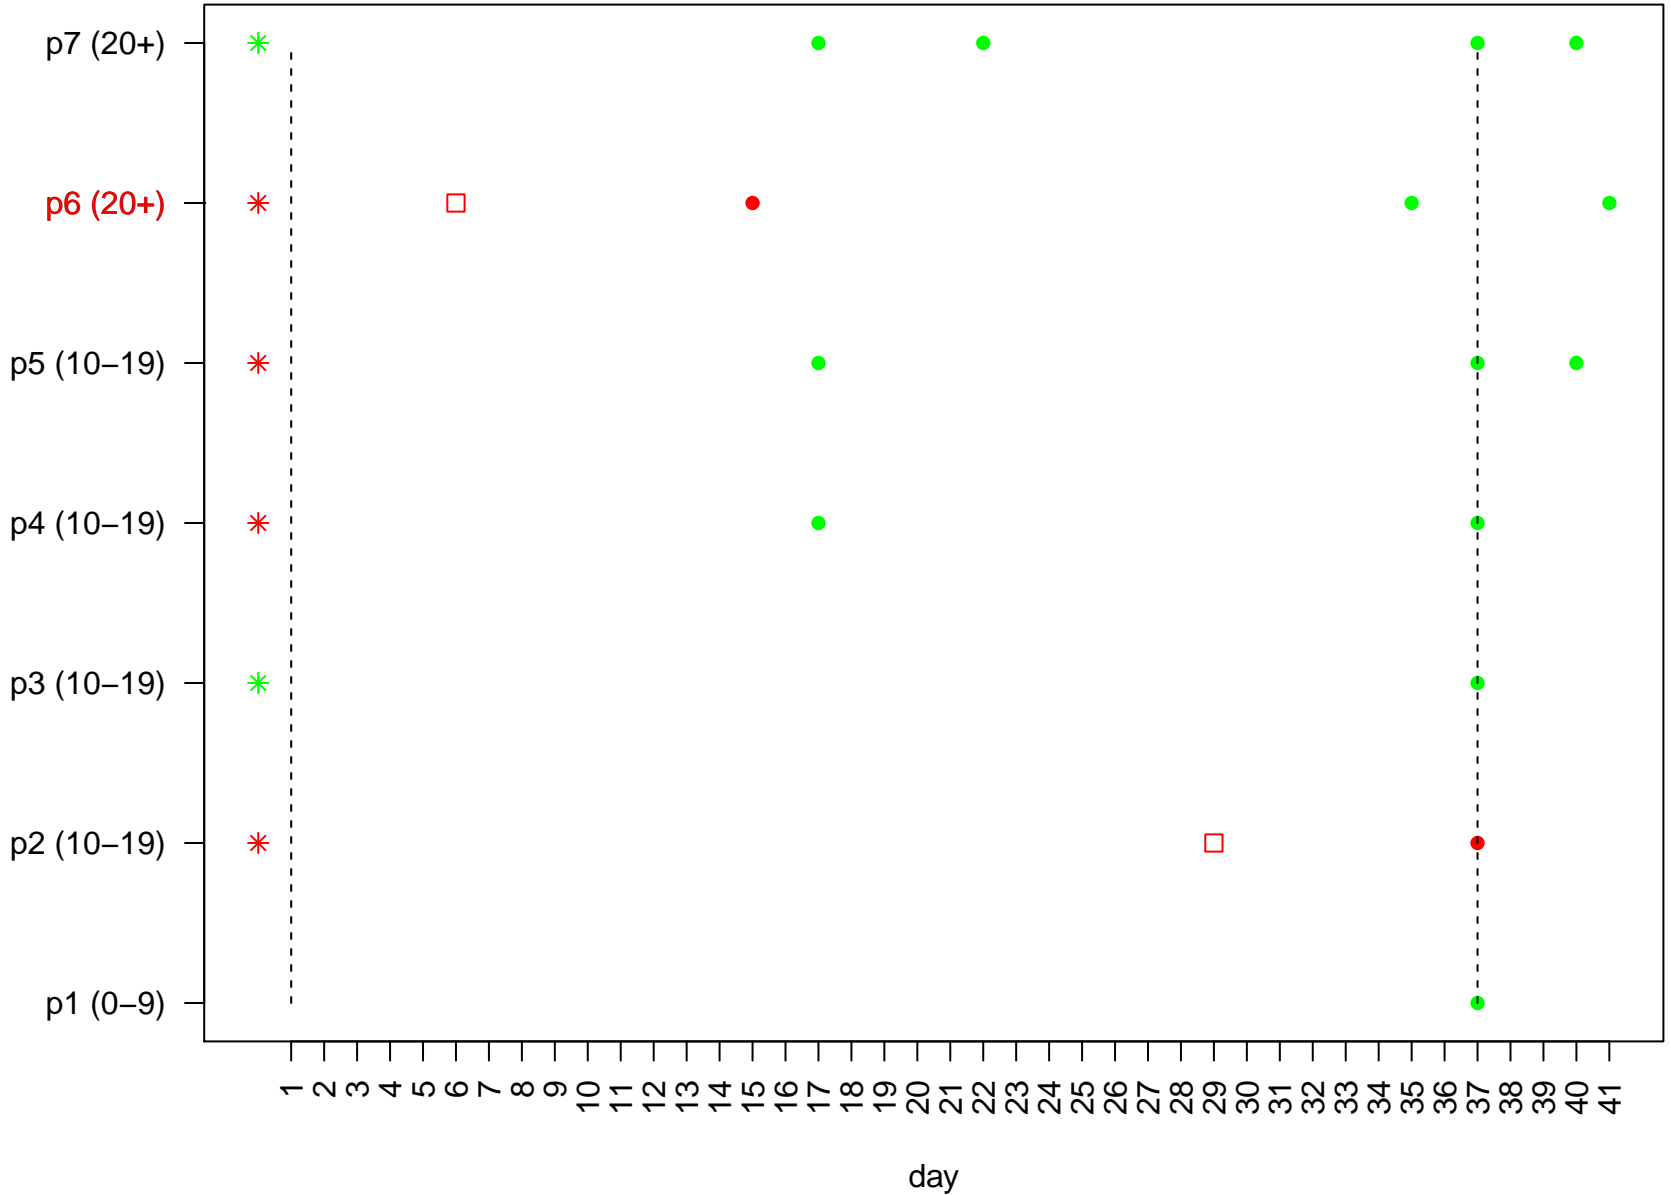

# Household 430

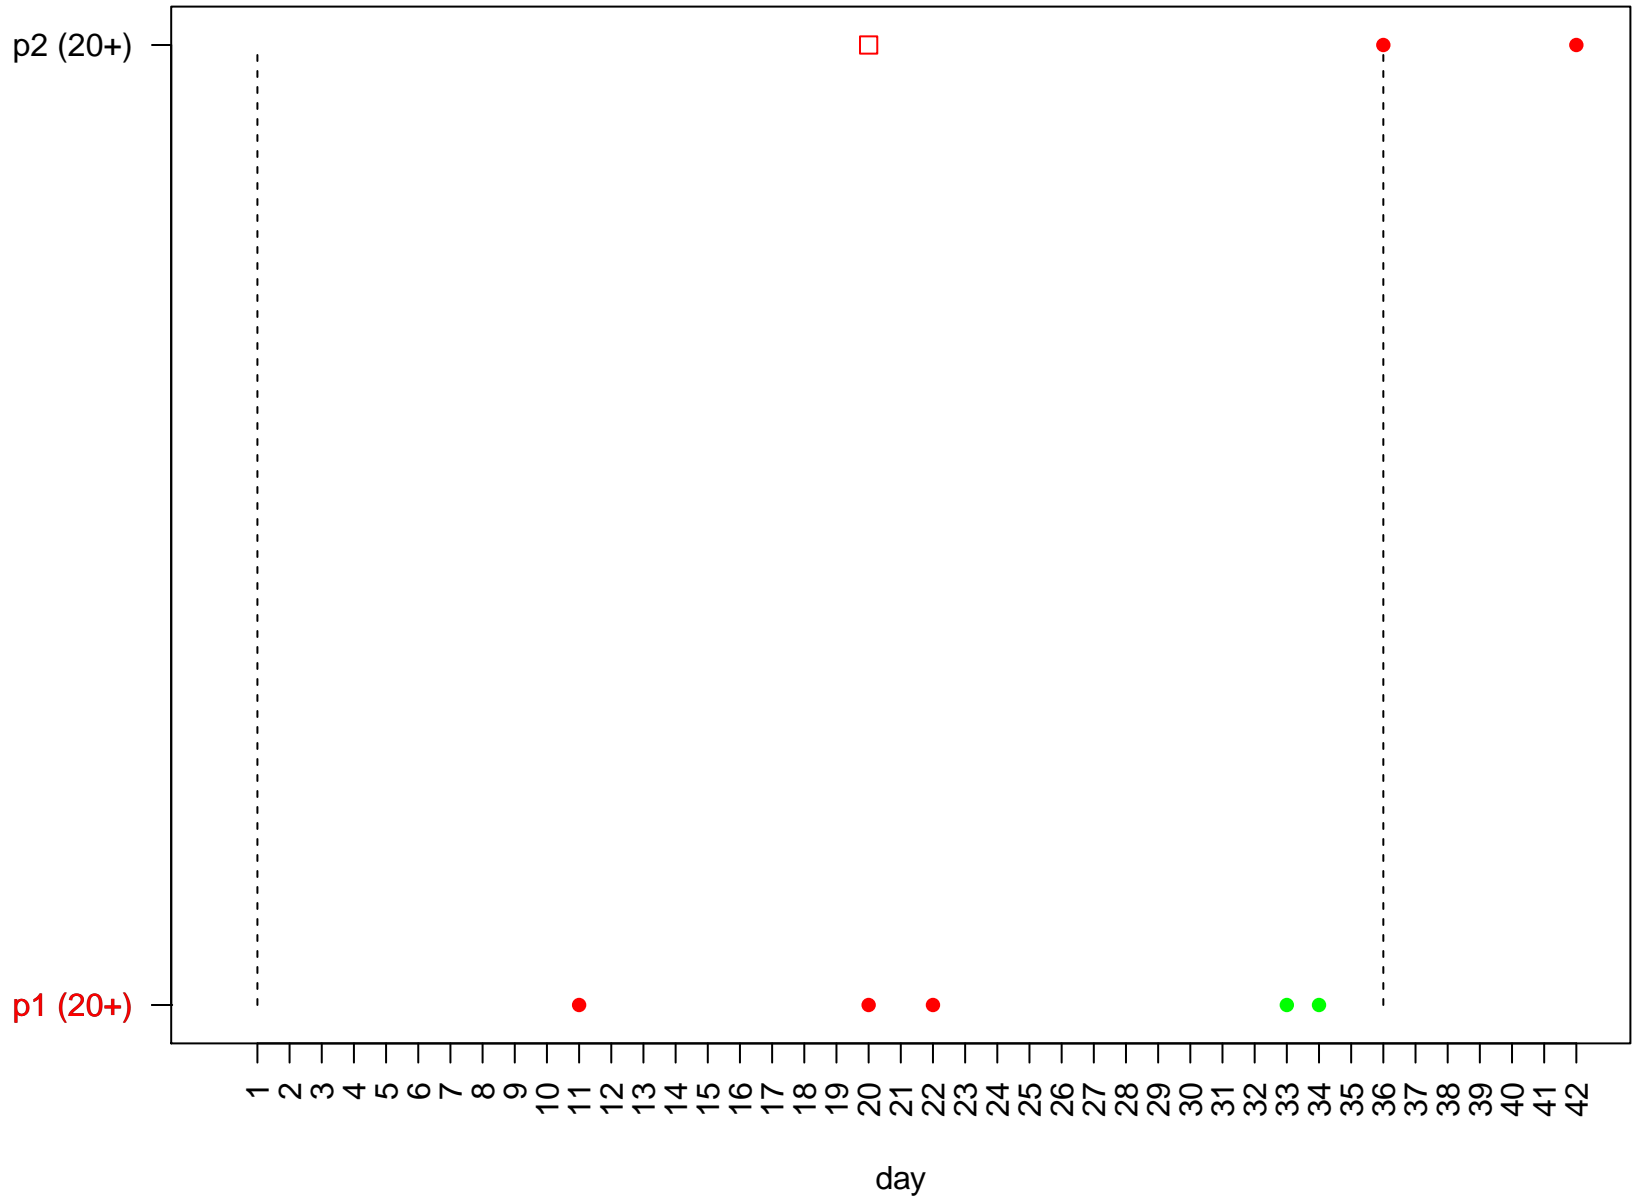

# Household 431

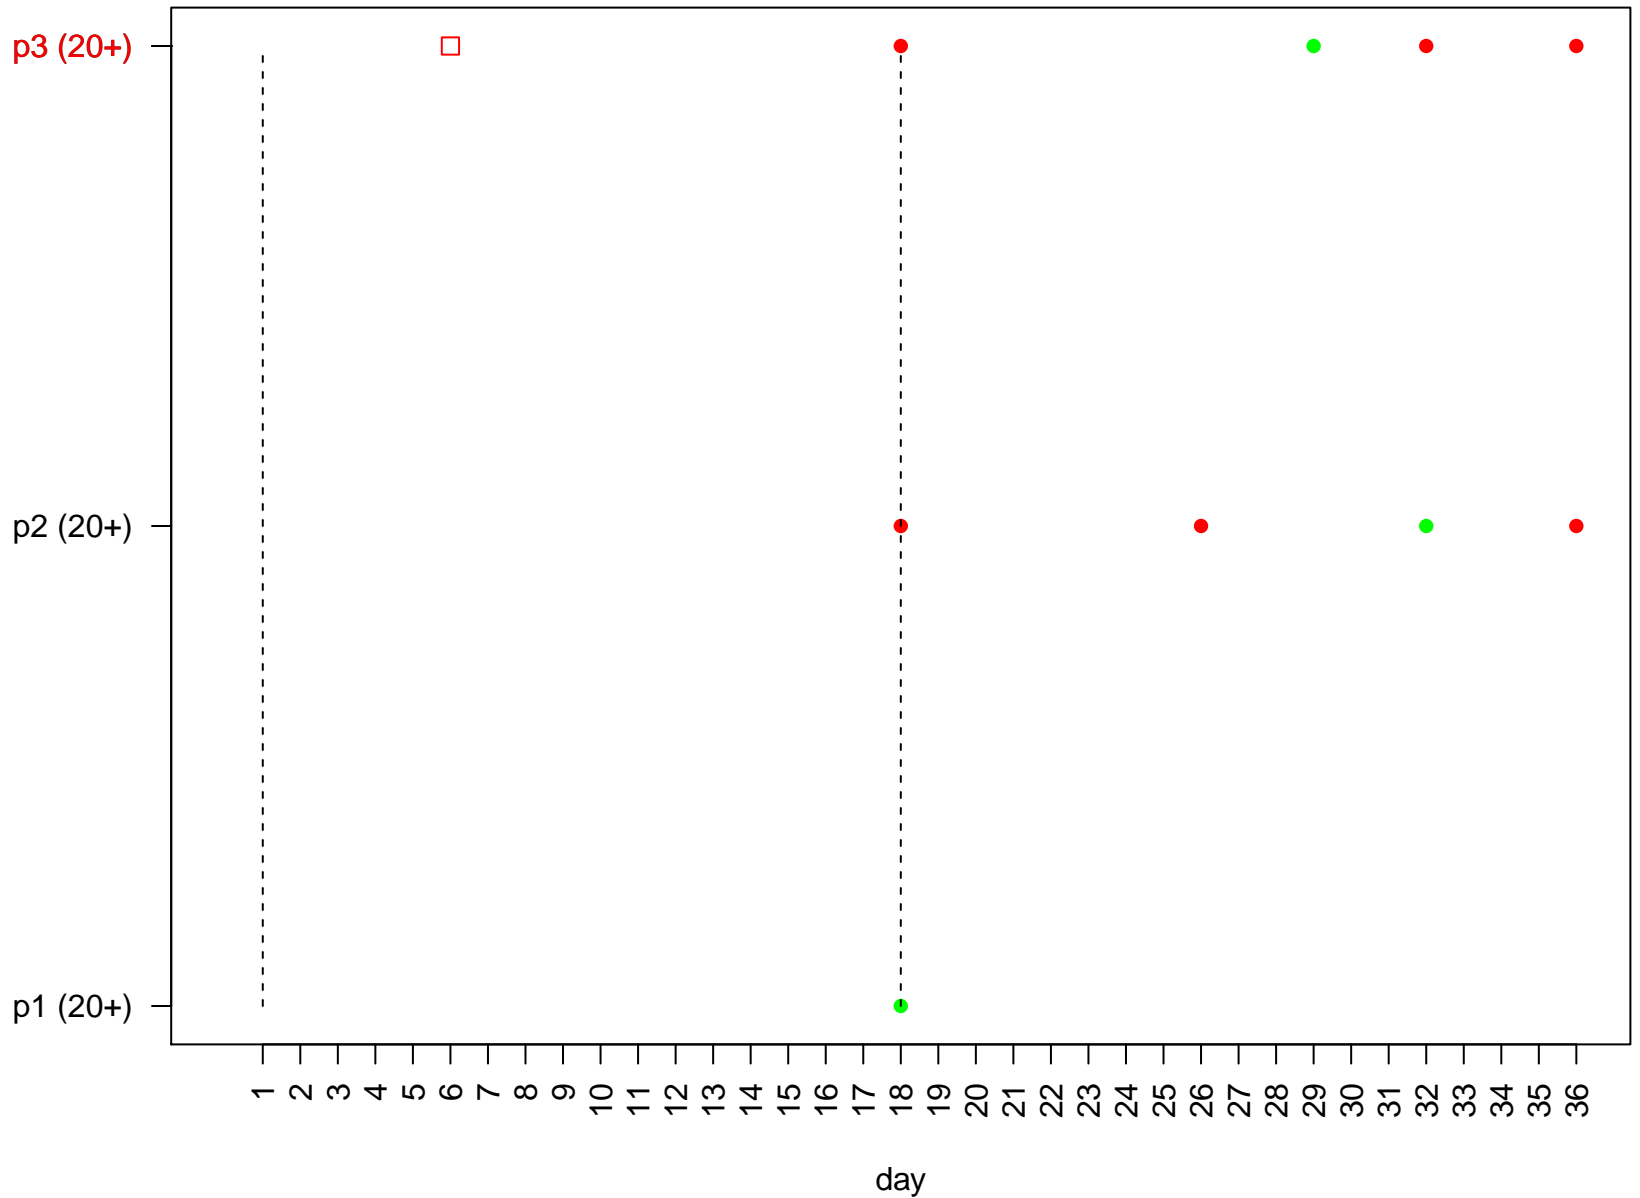

# Household 432

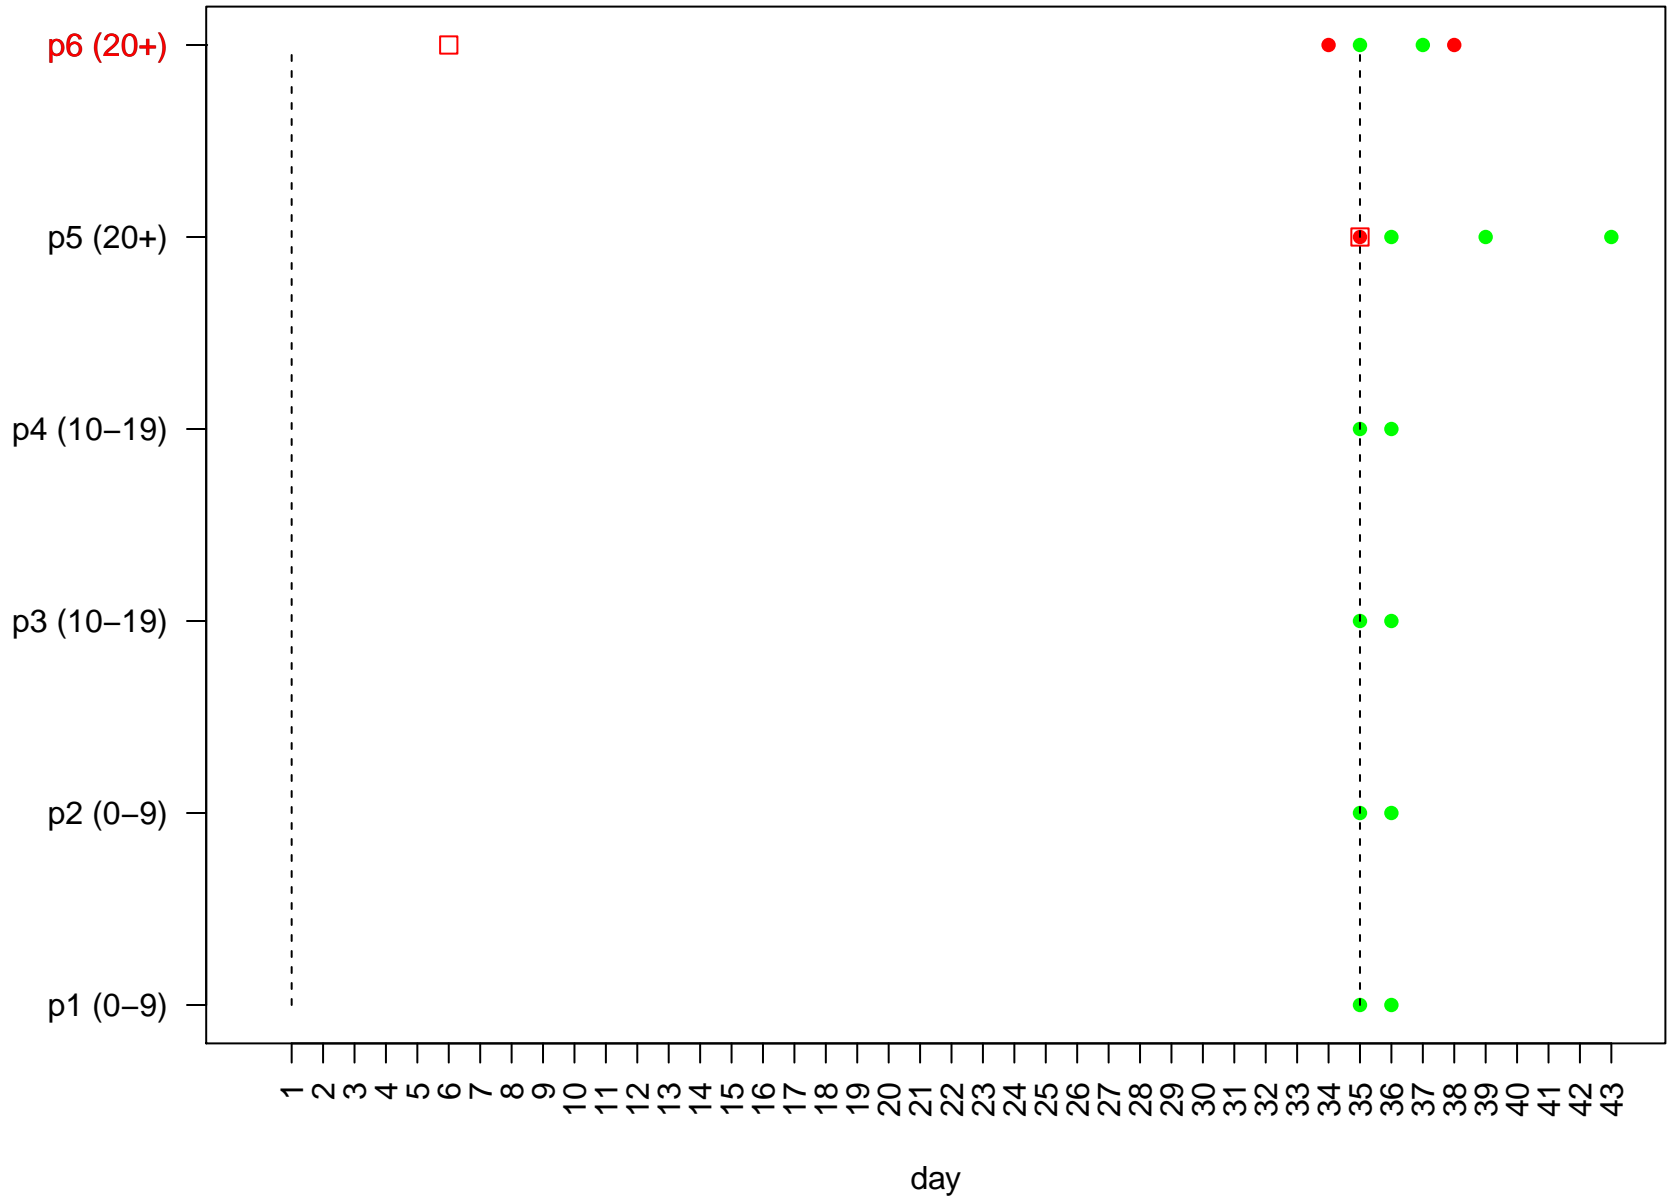



# Household 433

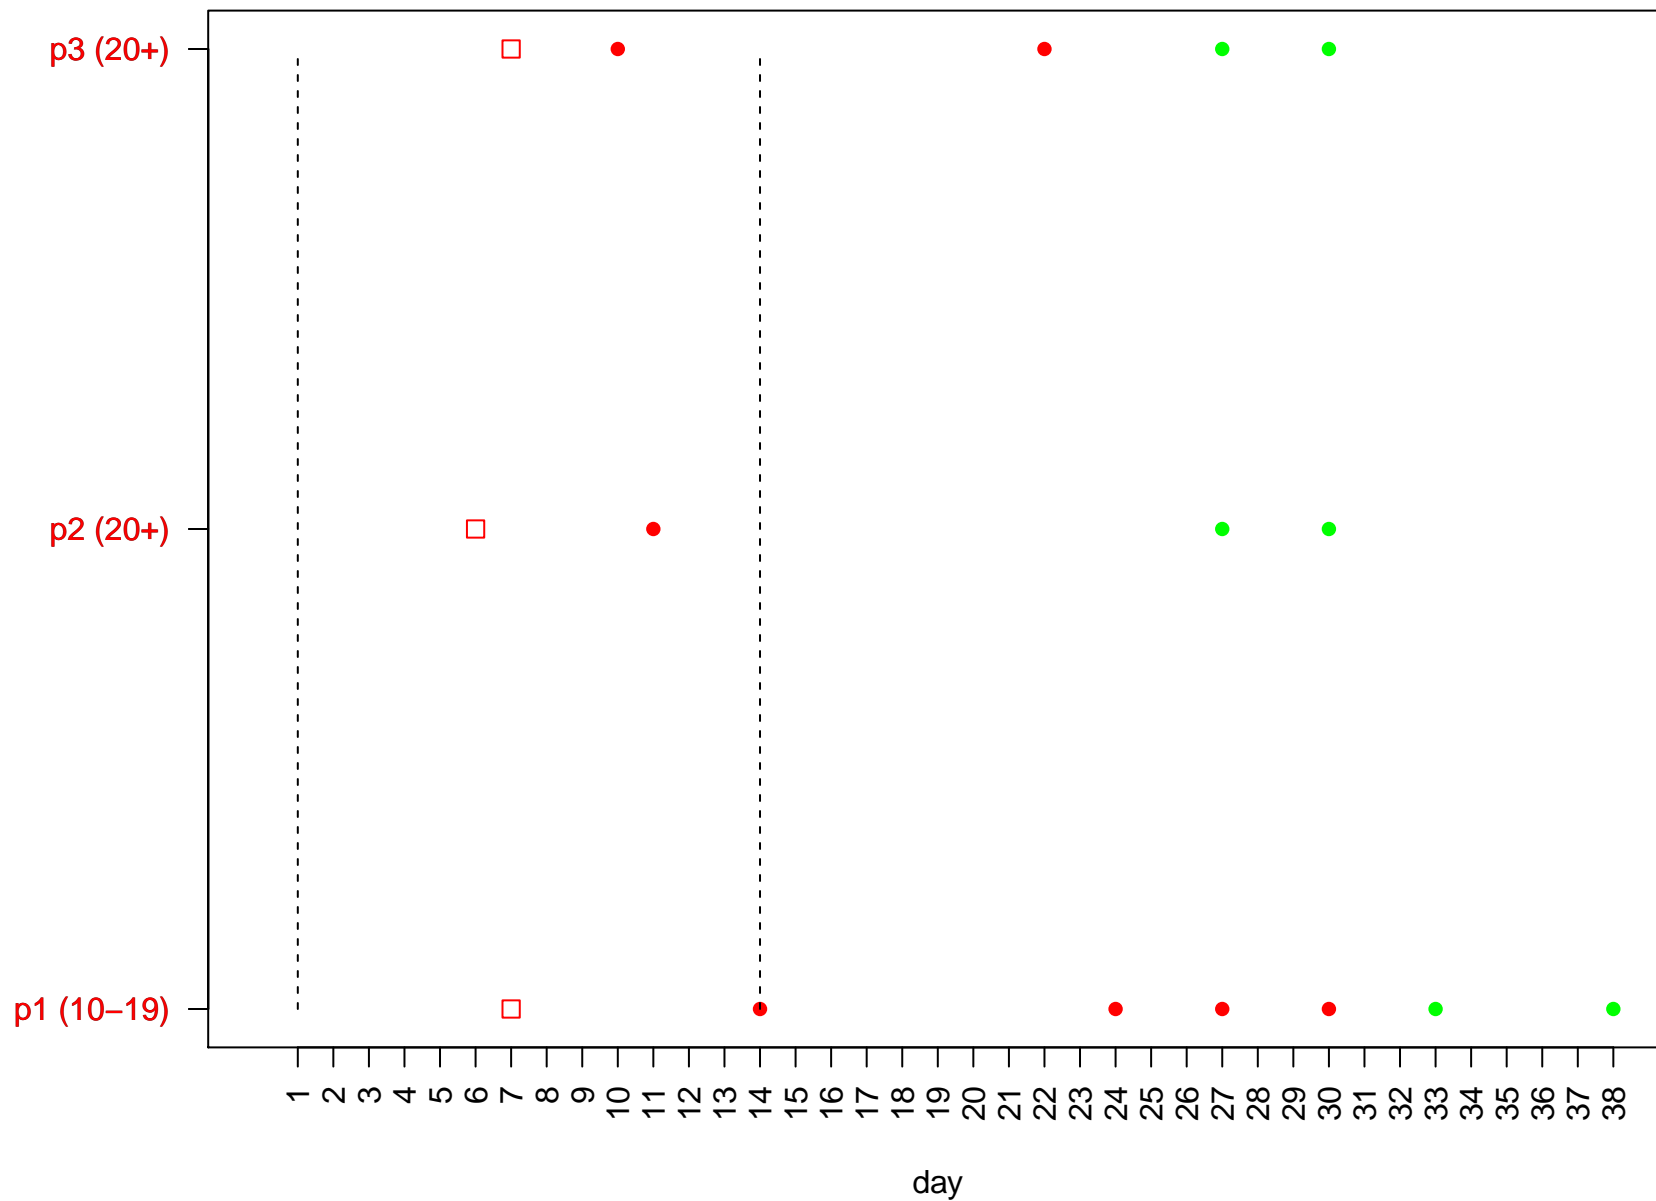

# Household 434

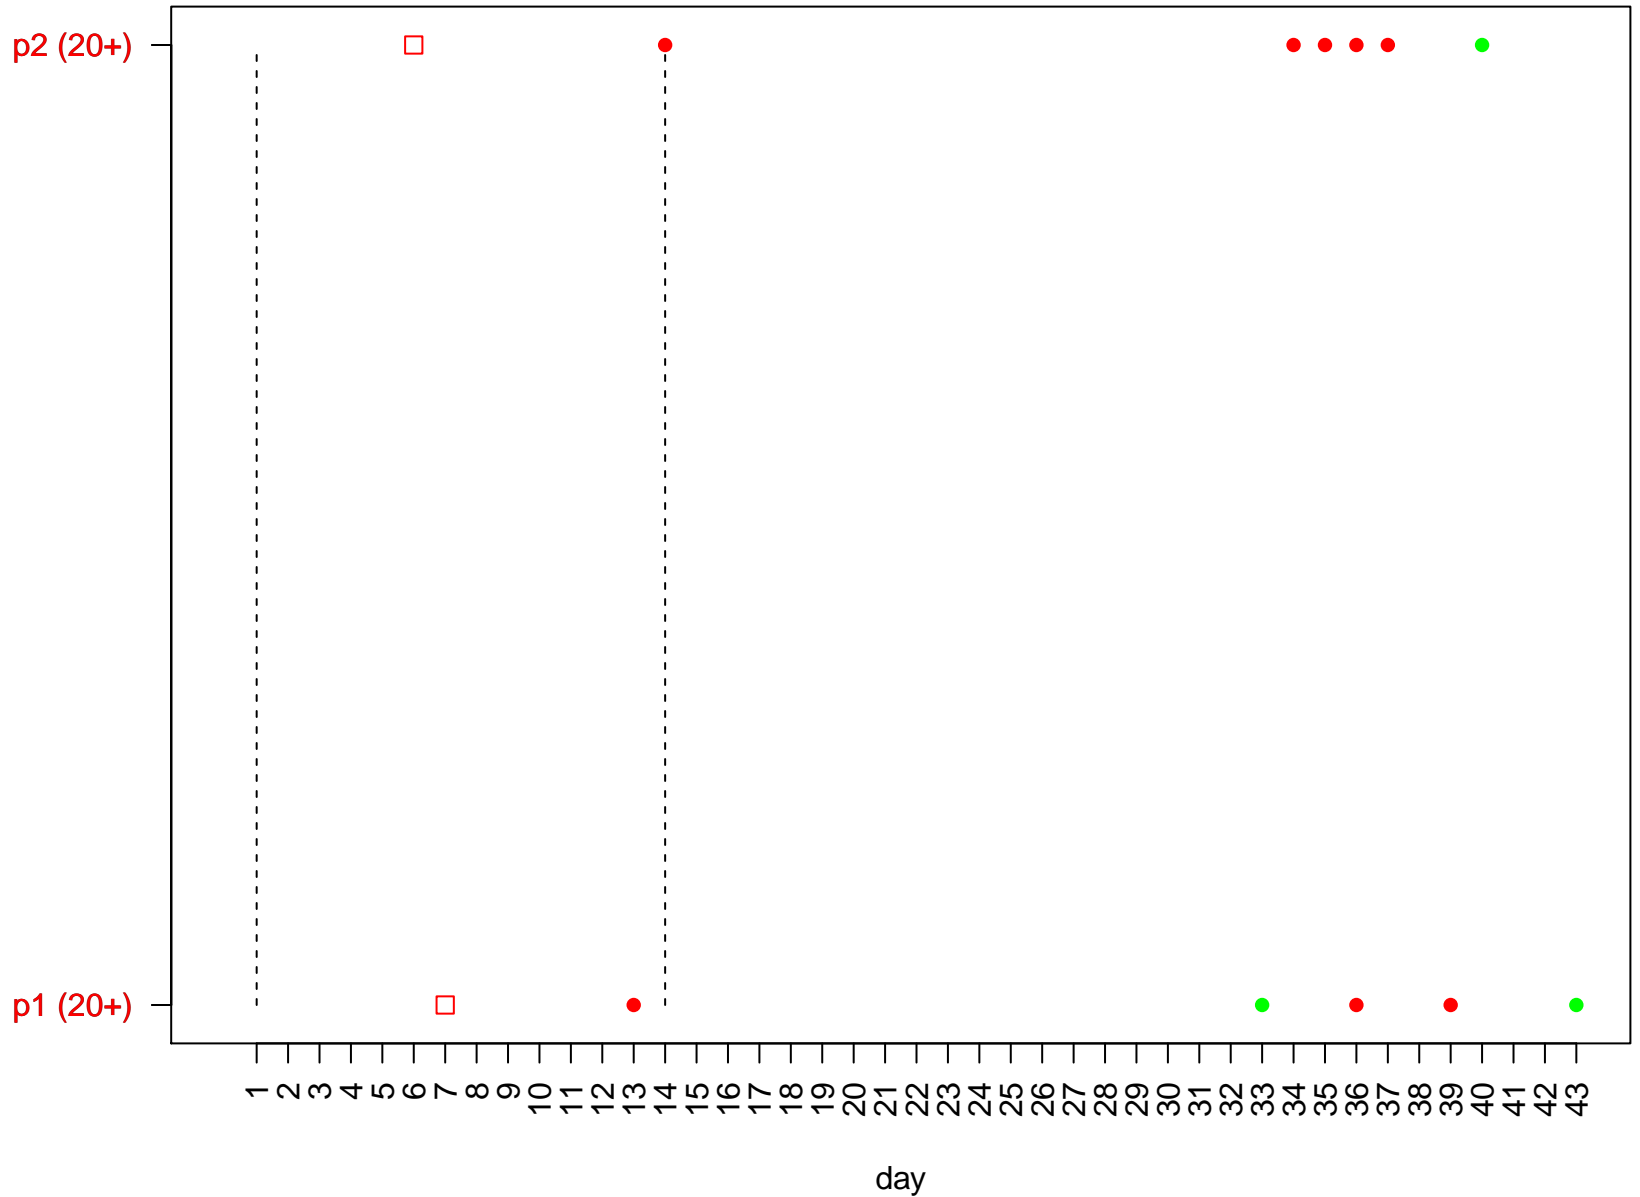

# Household 435

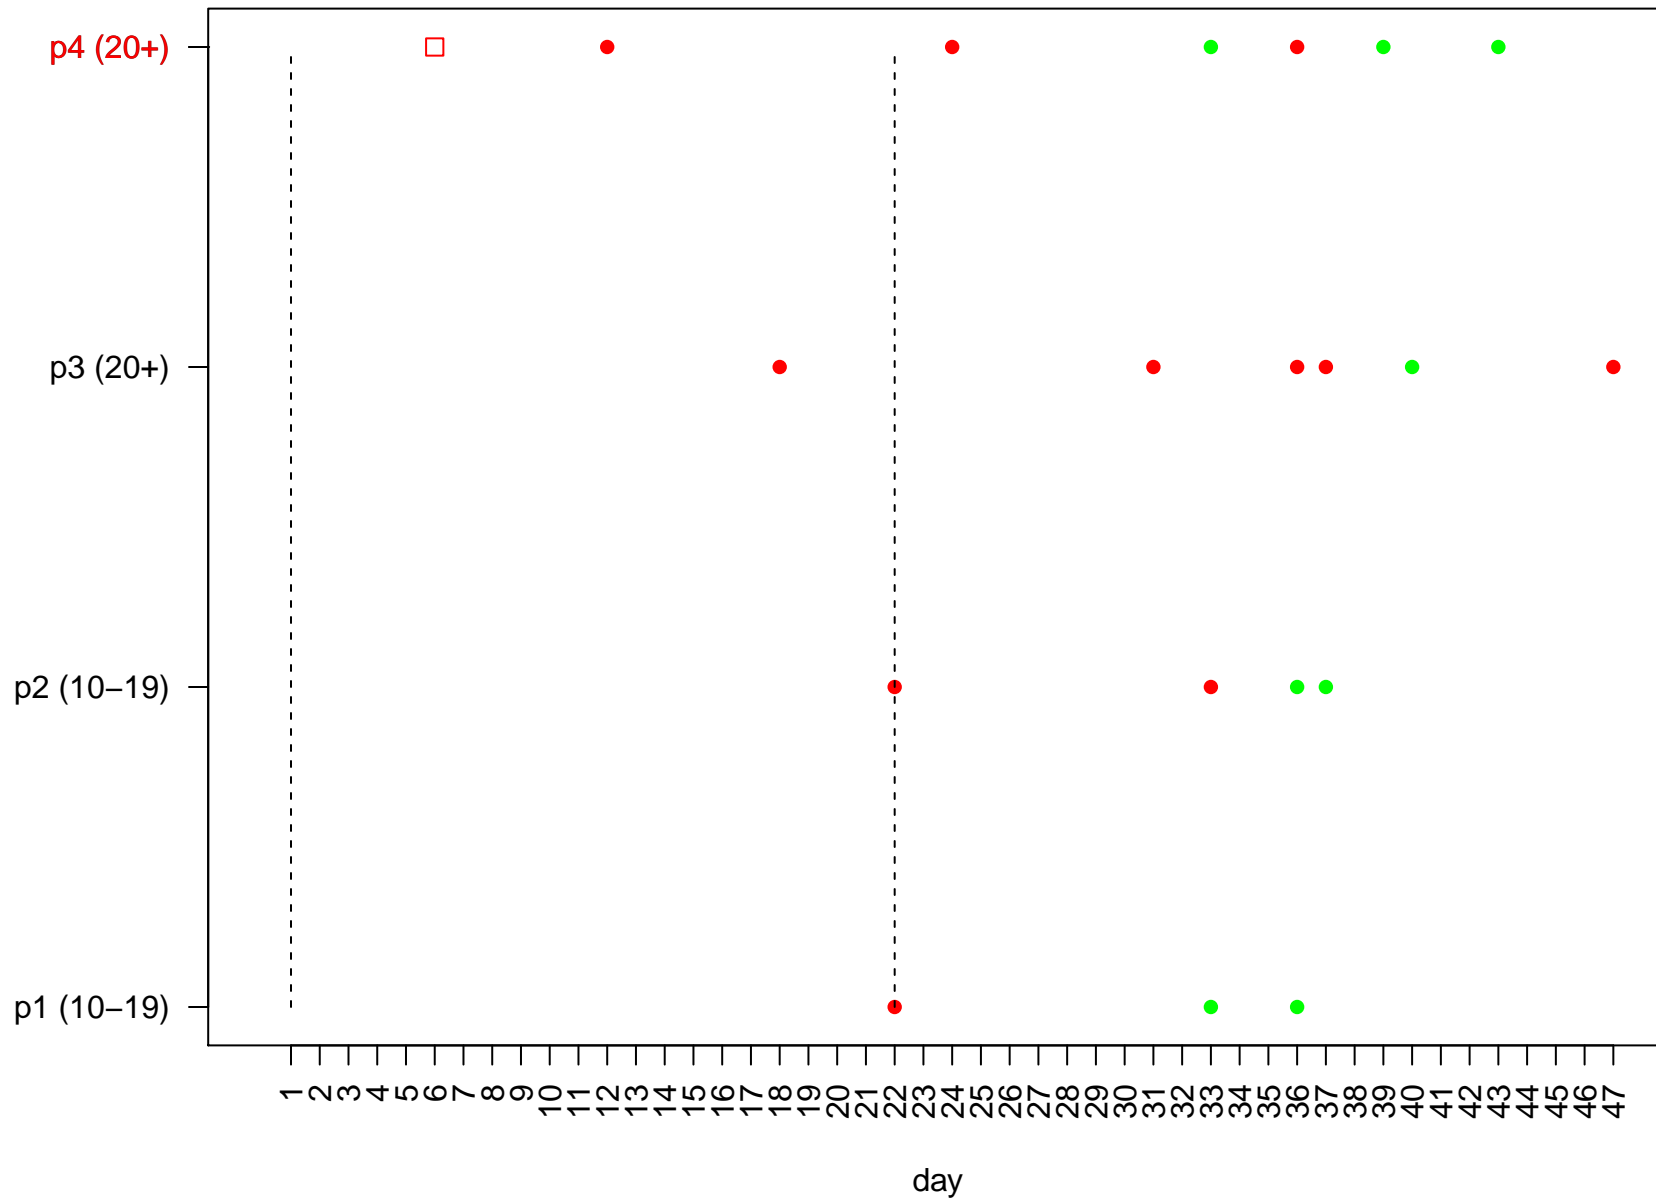



# Household 437

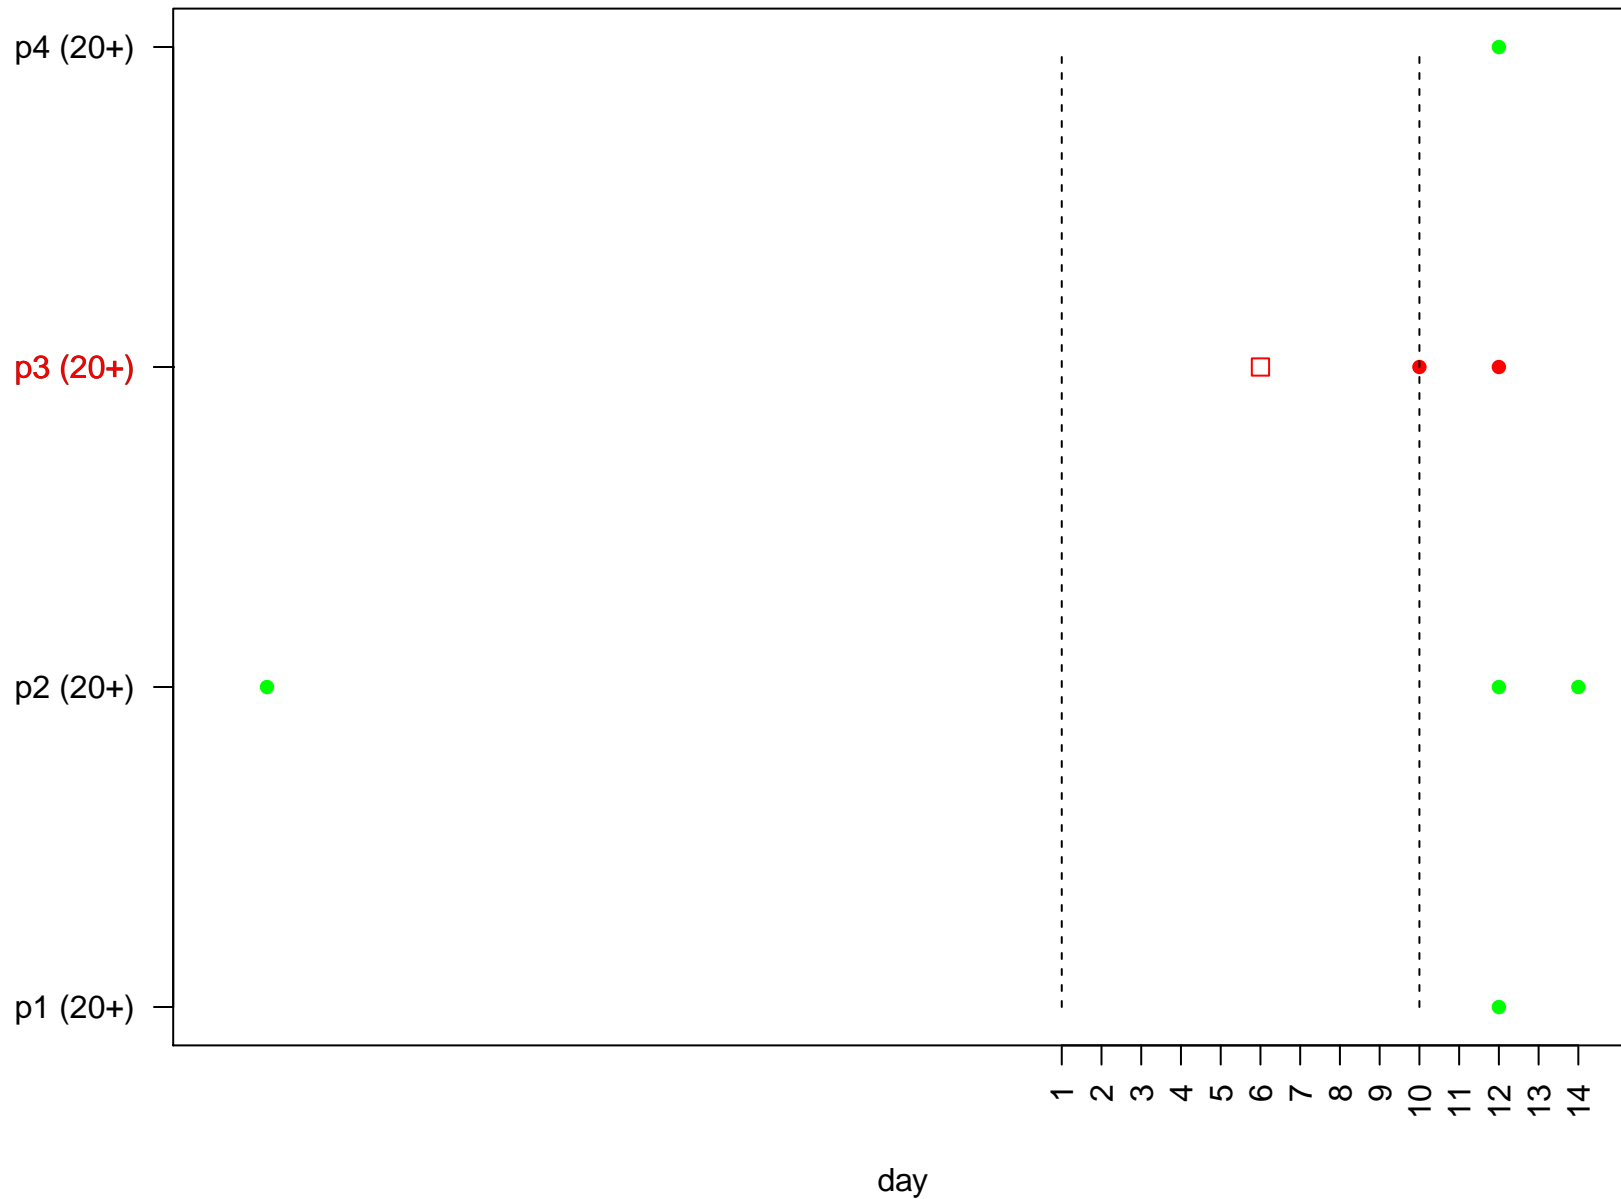

# Household 438

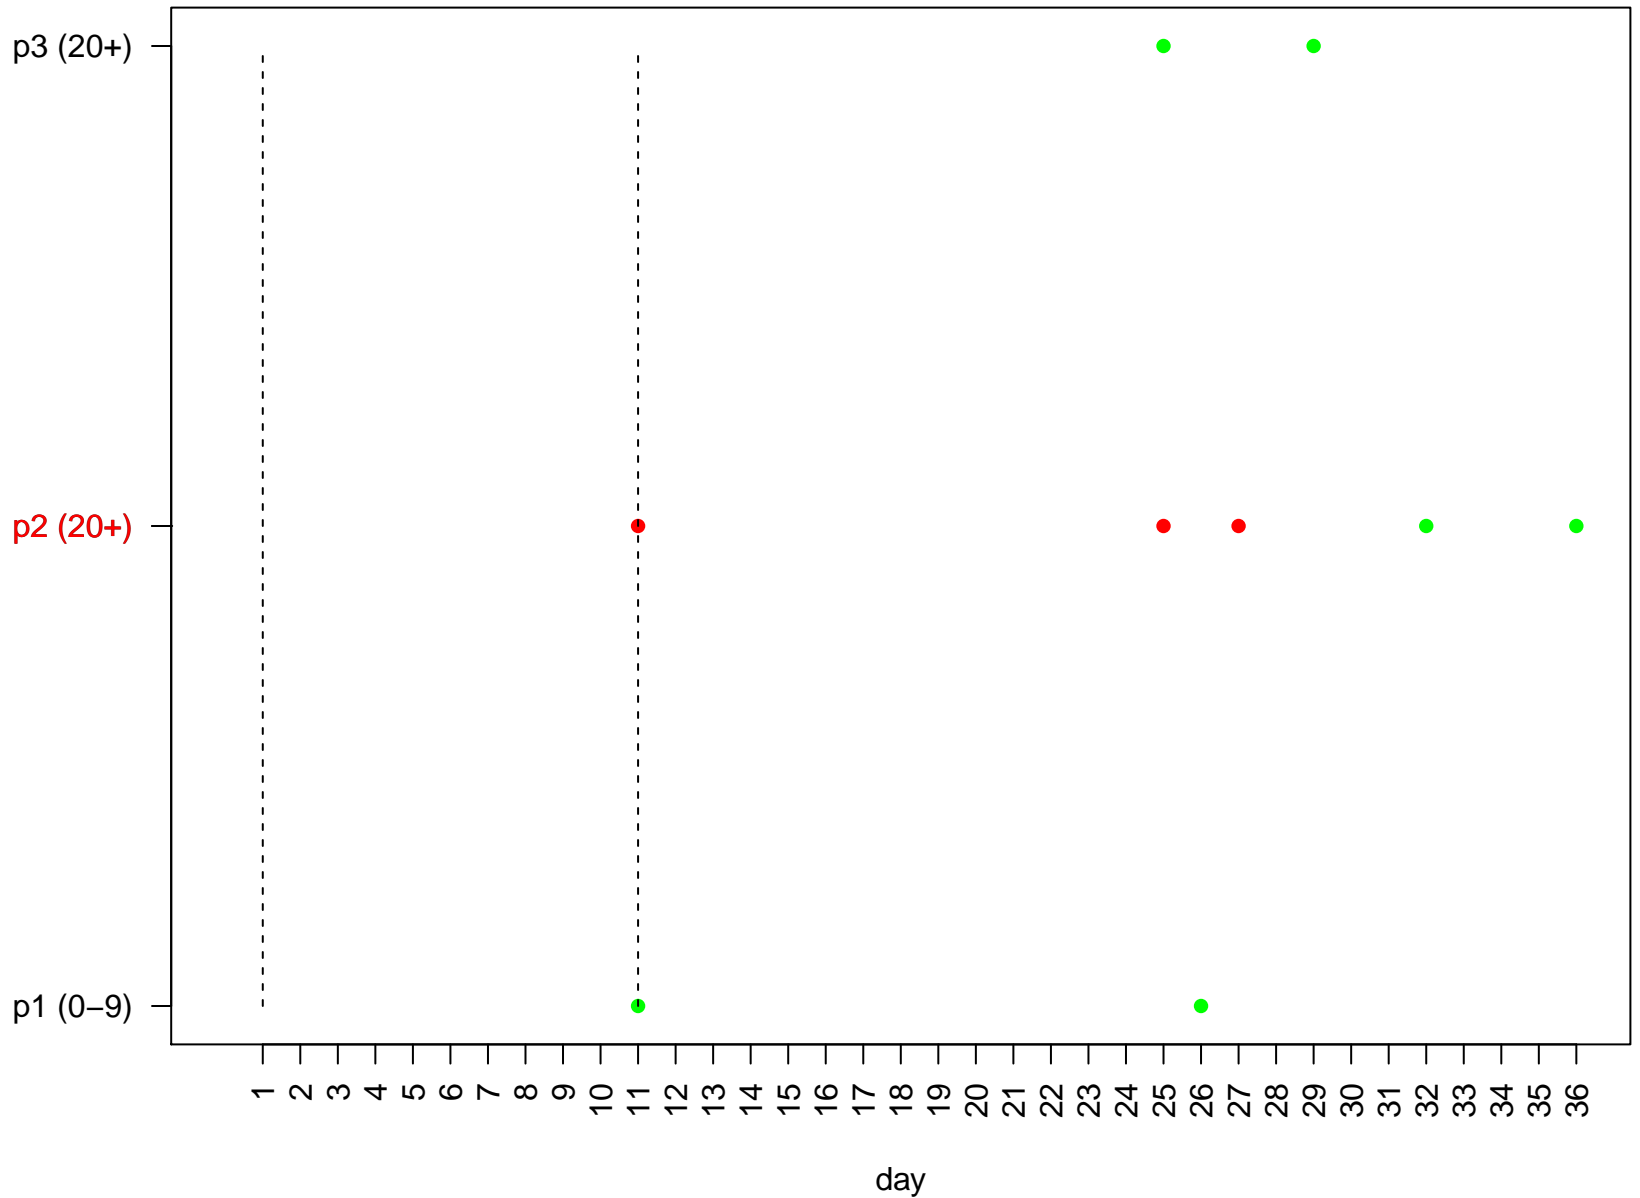

# Household 439

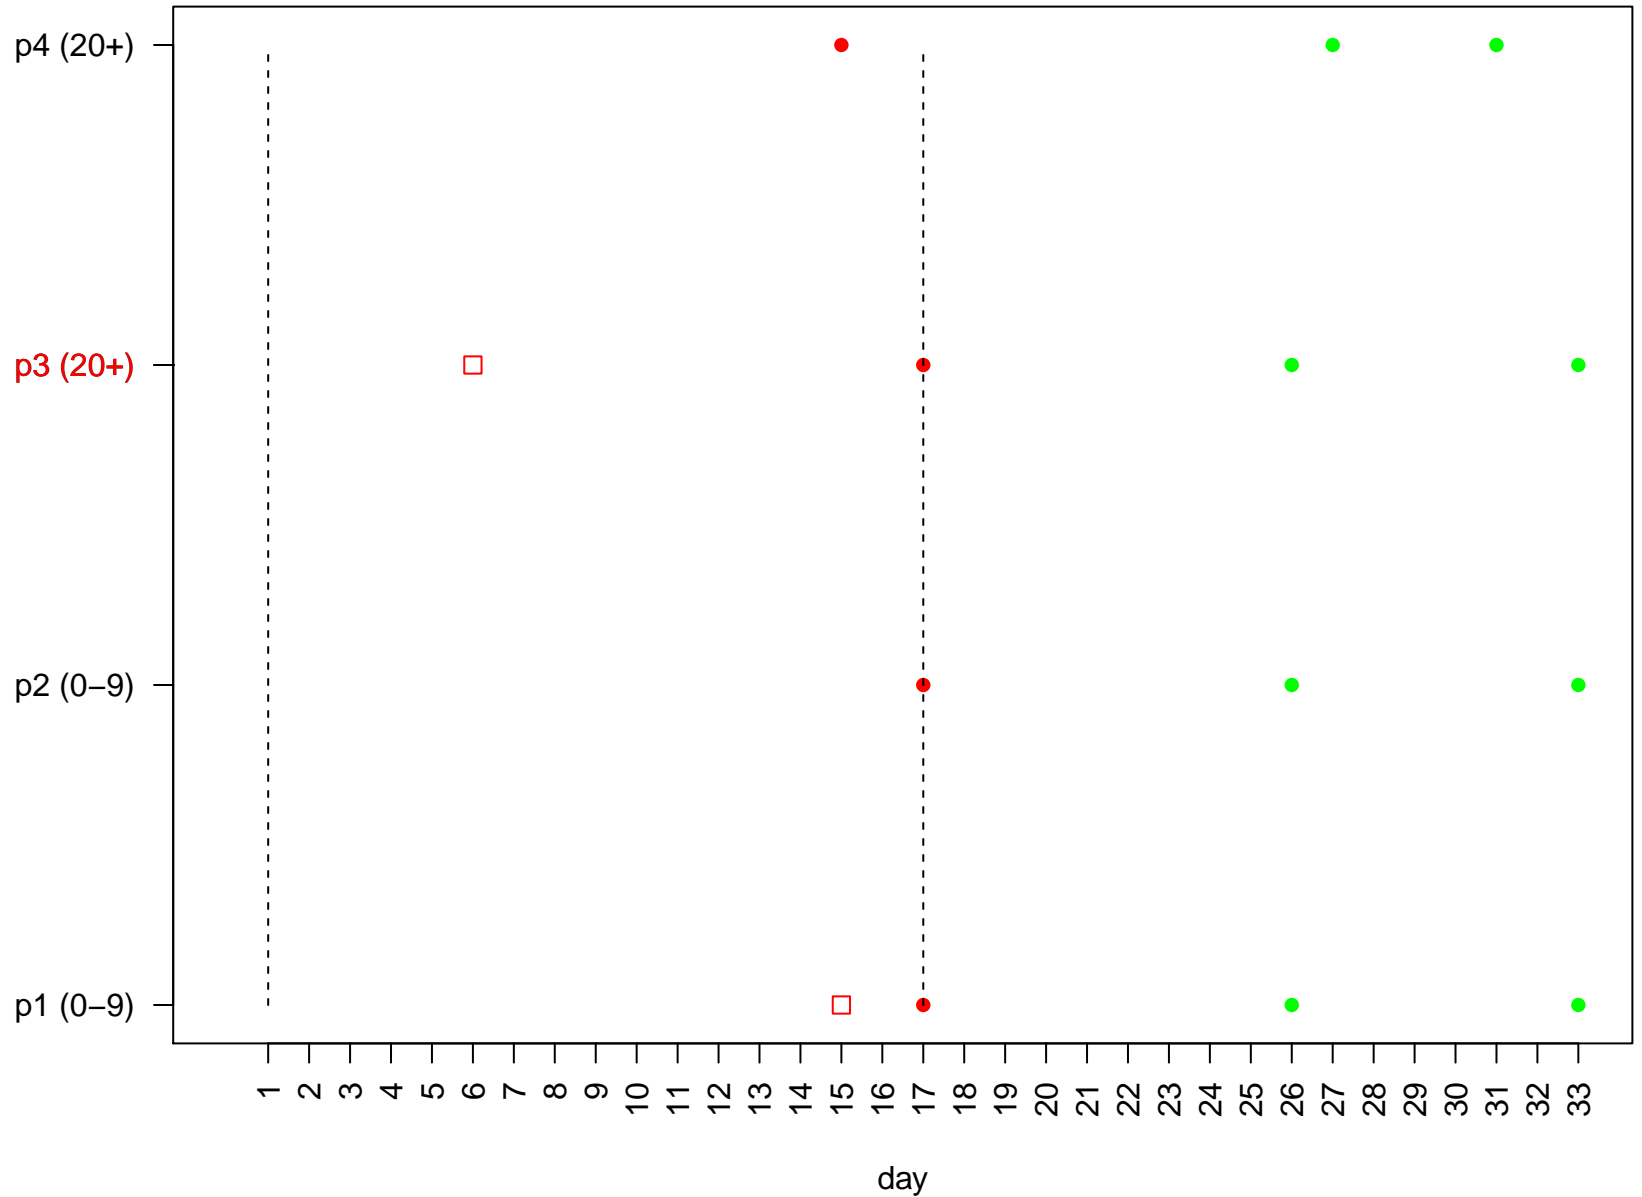

# Household 441

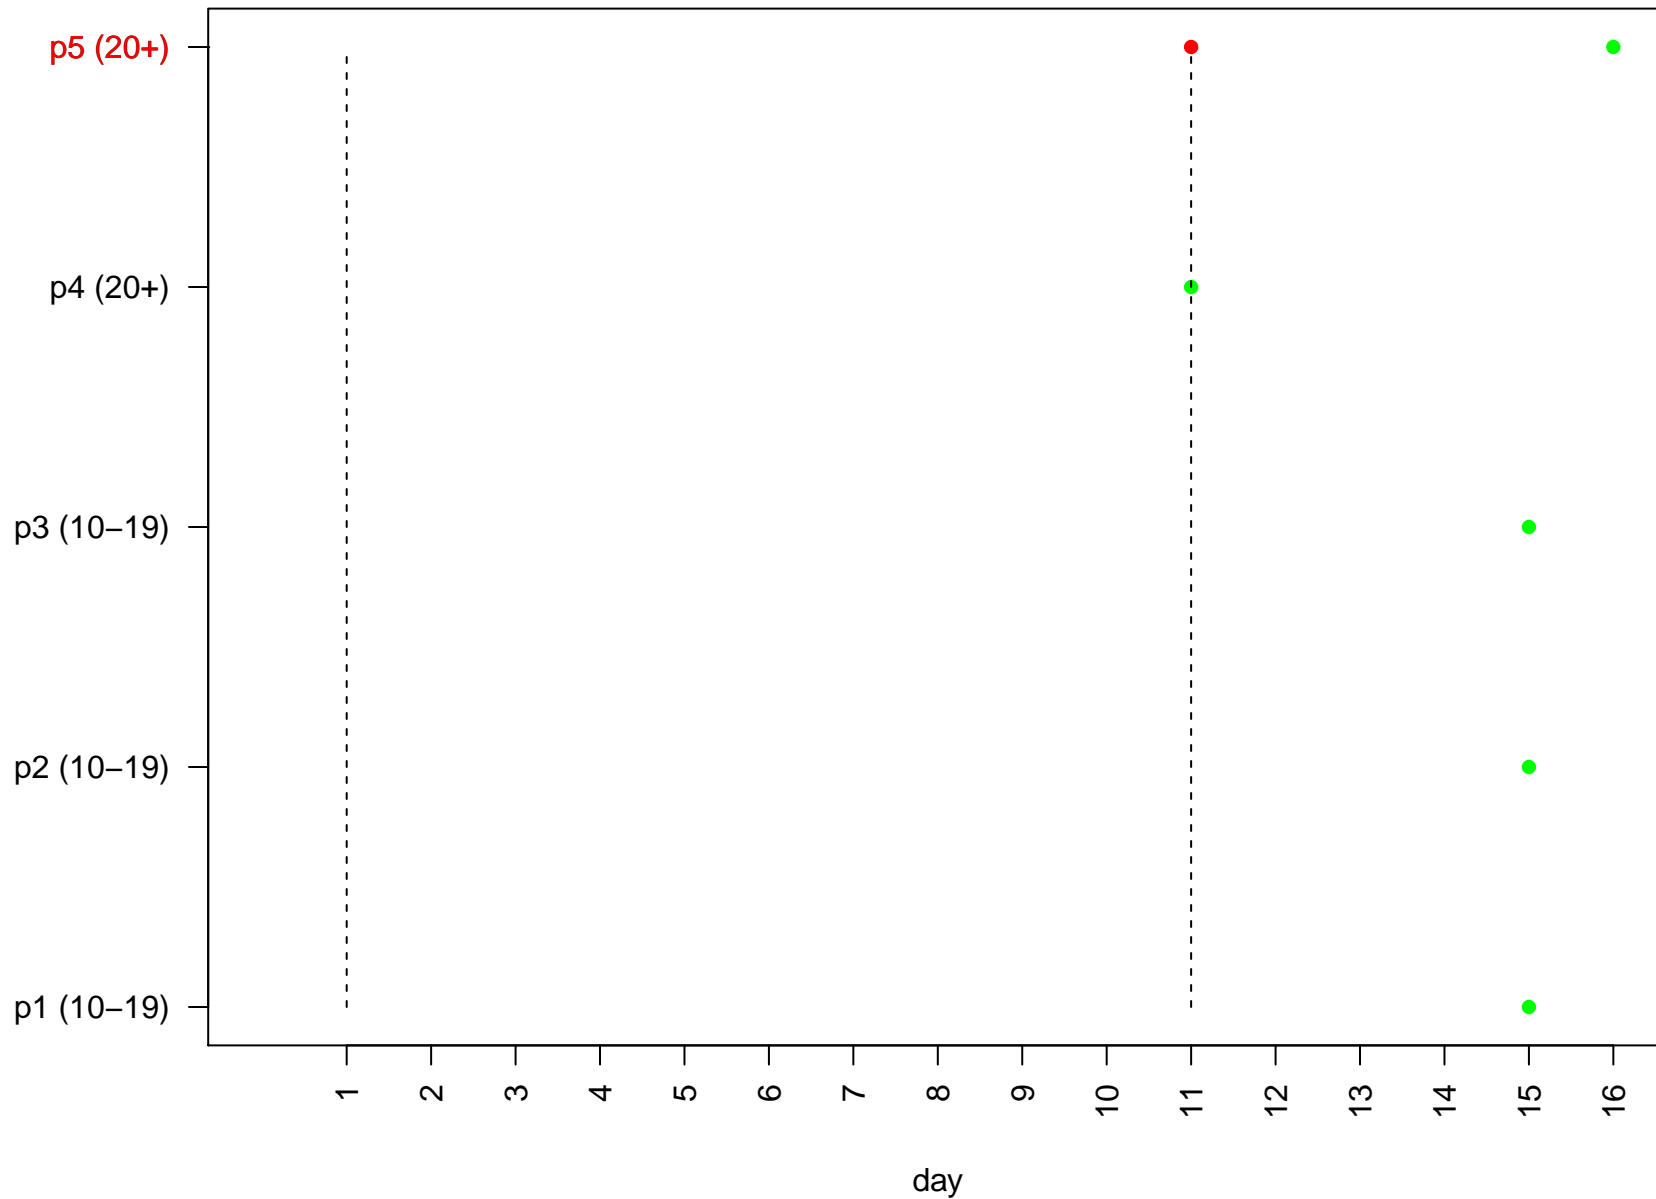



# Household 442

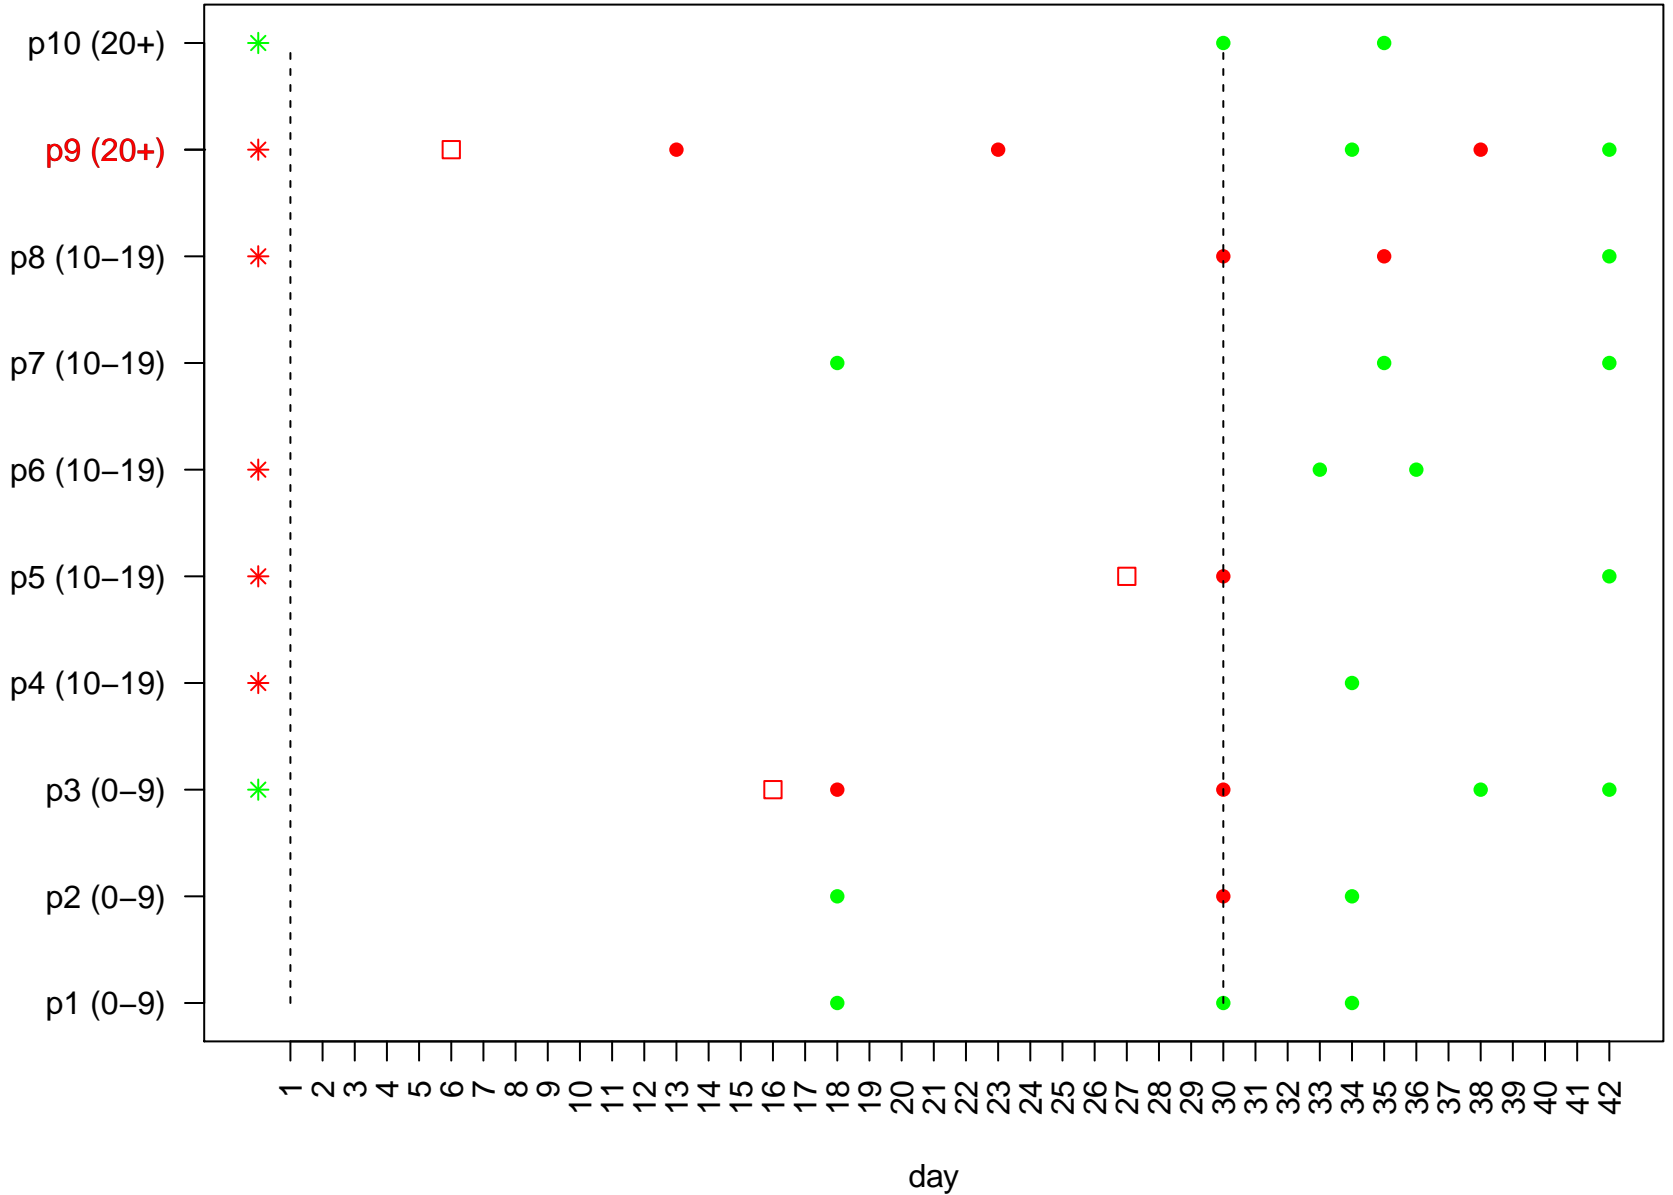

# Household 443

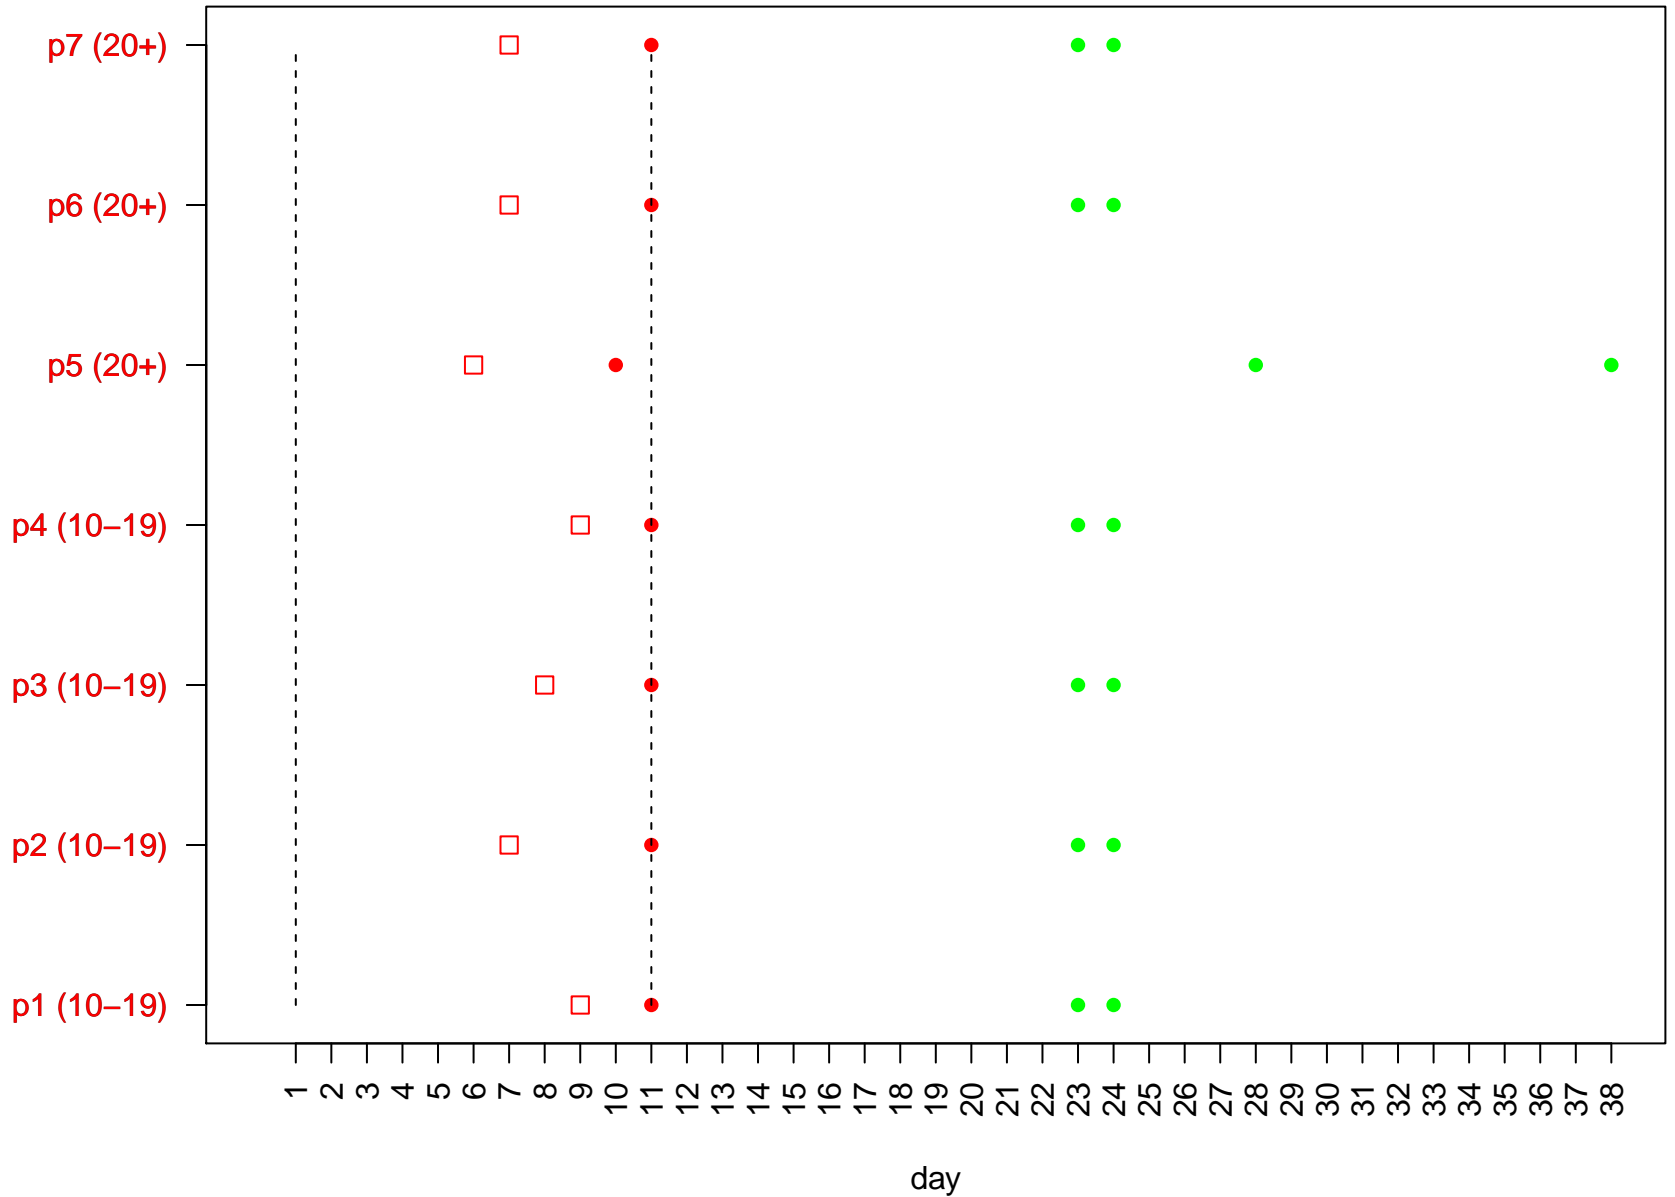

# Household 444

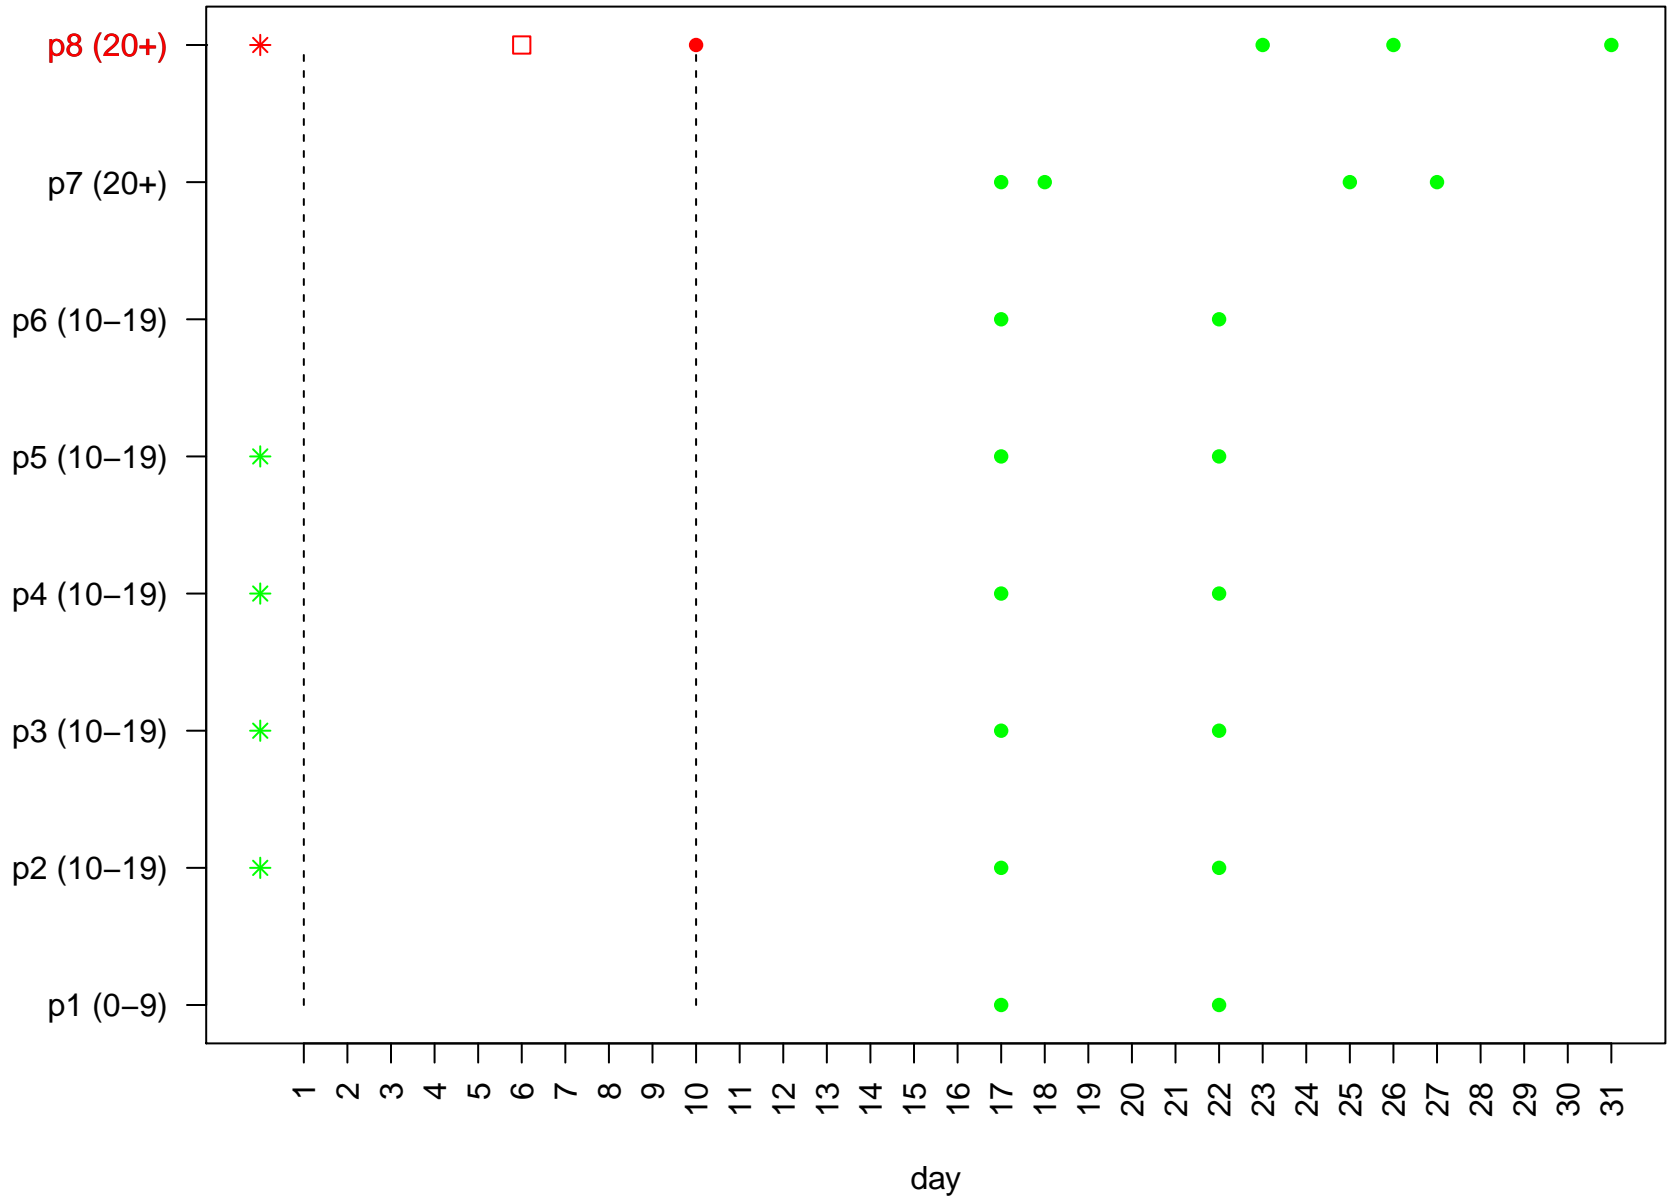

# Household 445

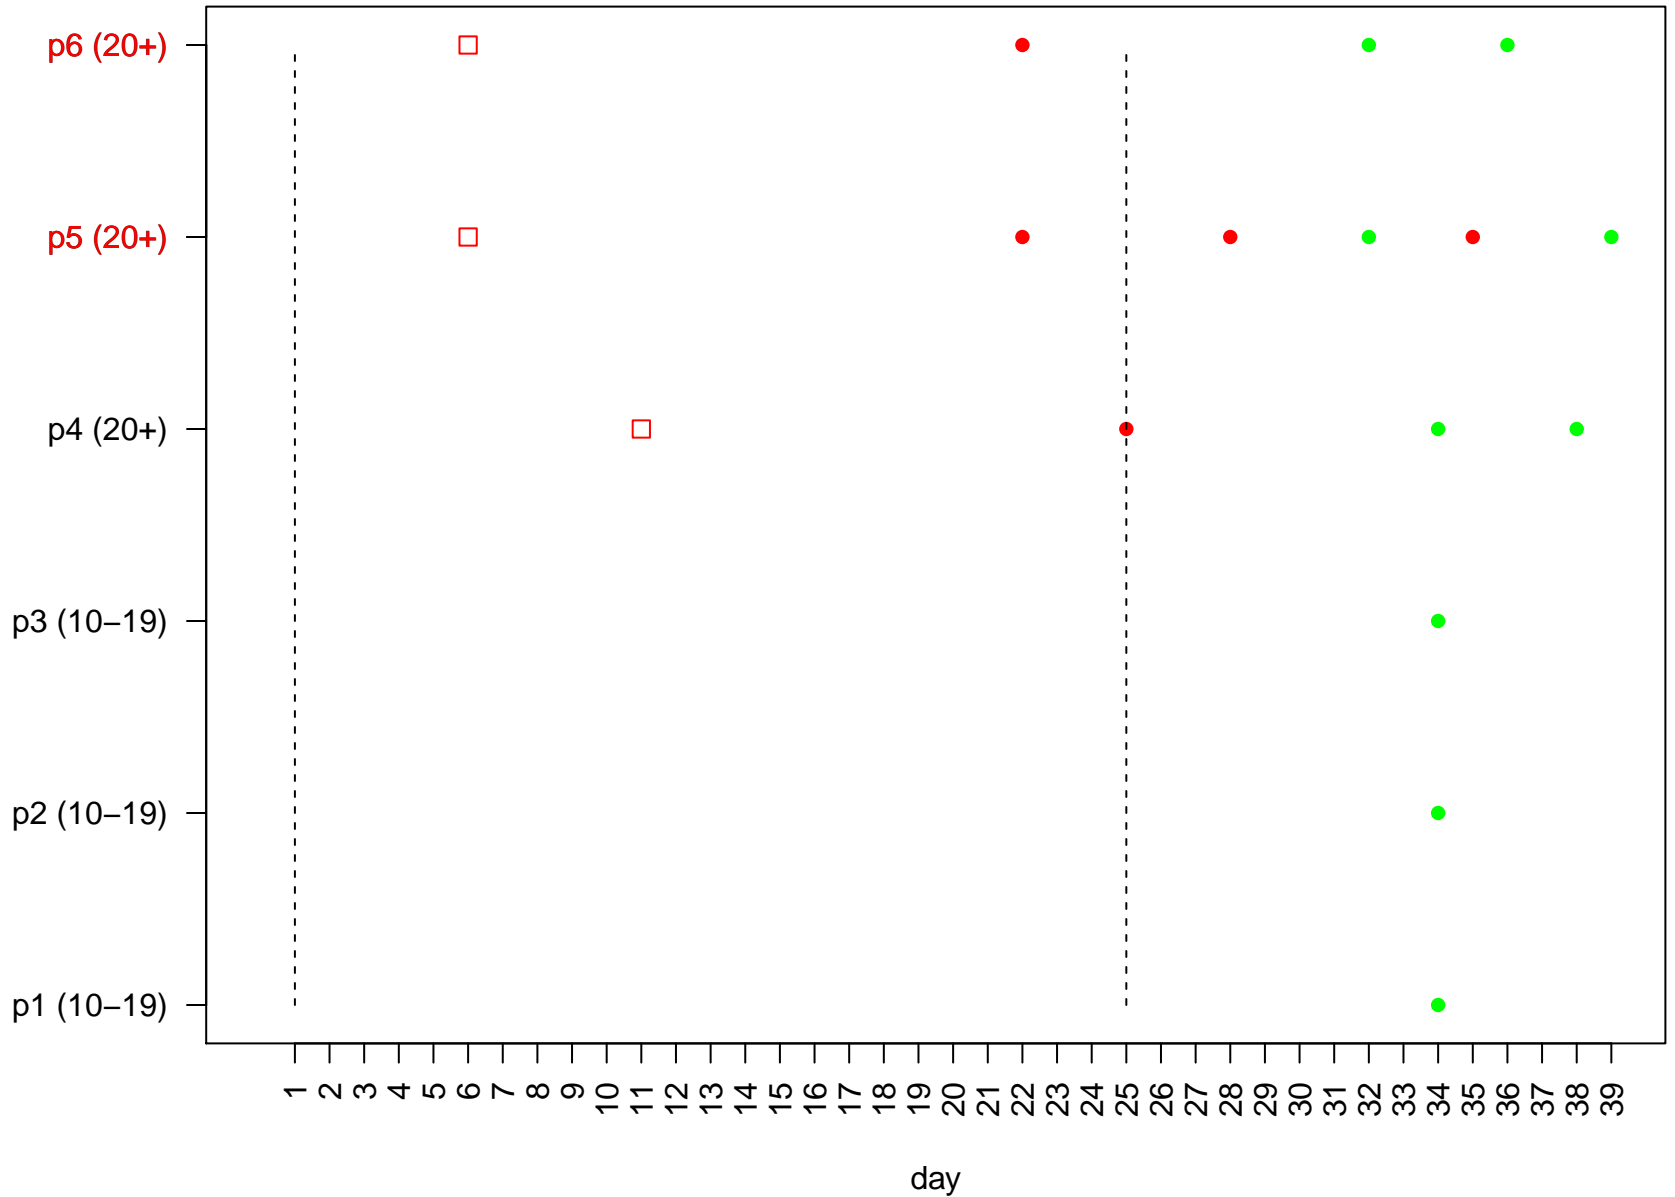

# Household 446

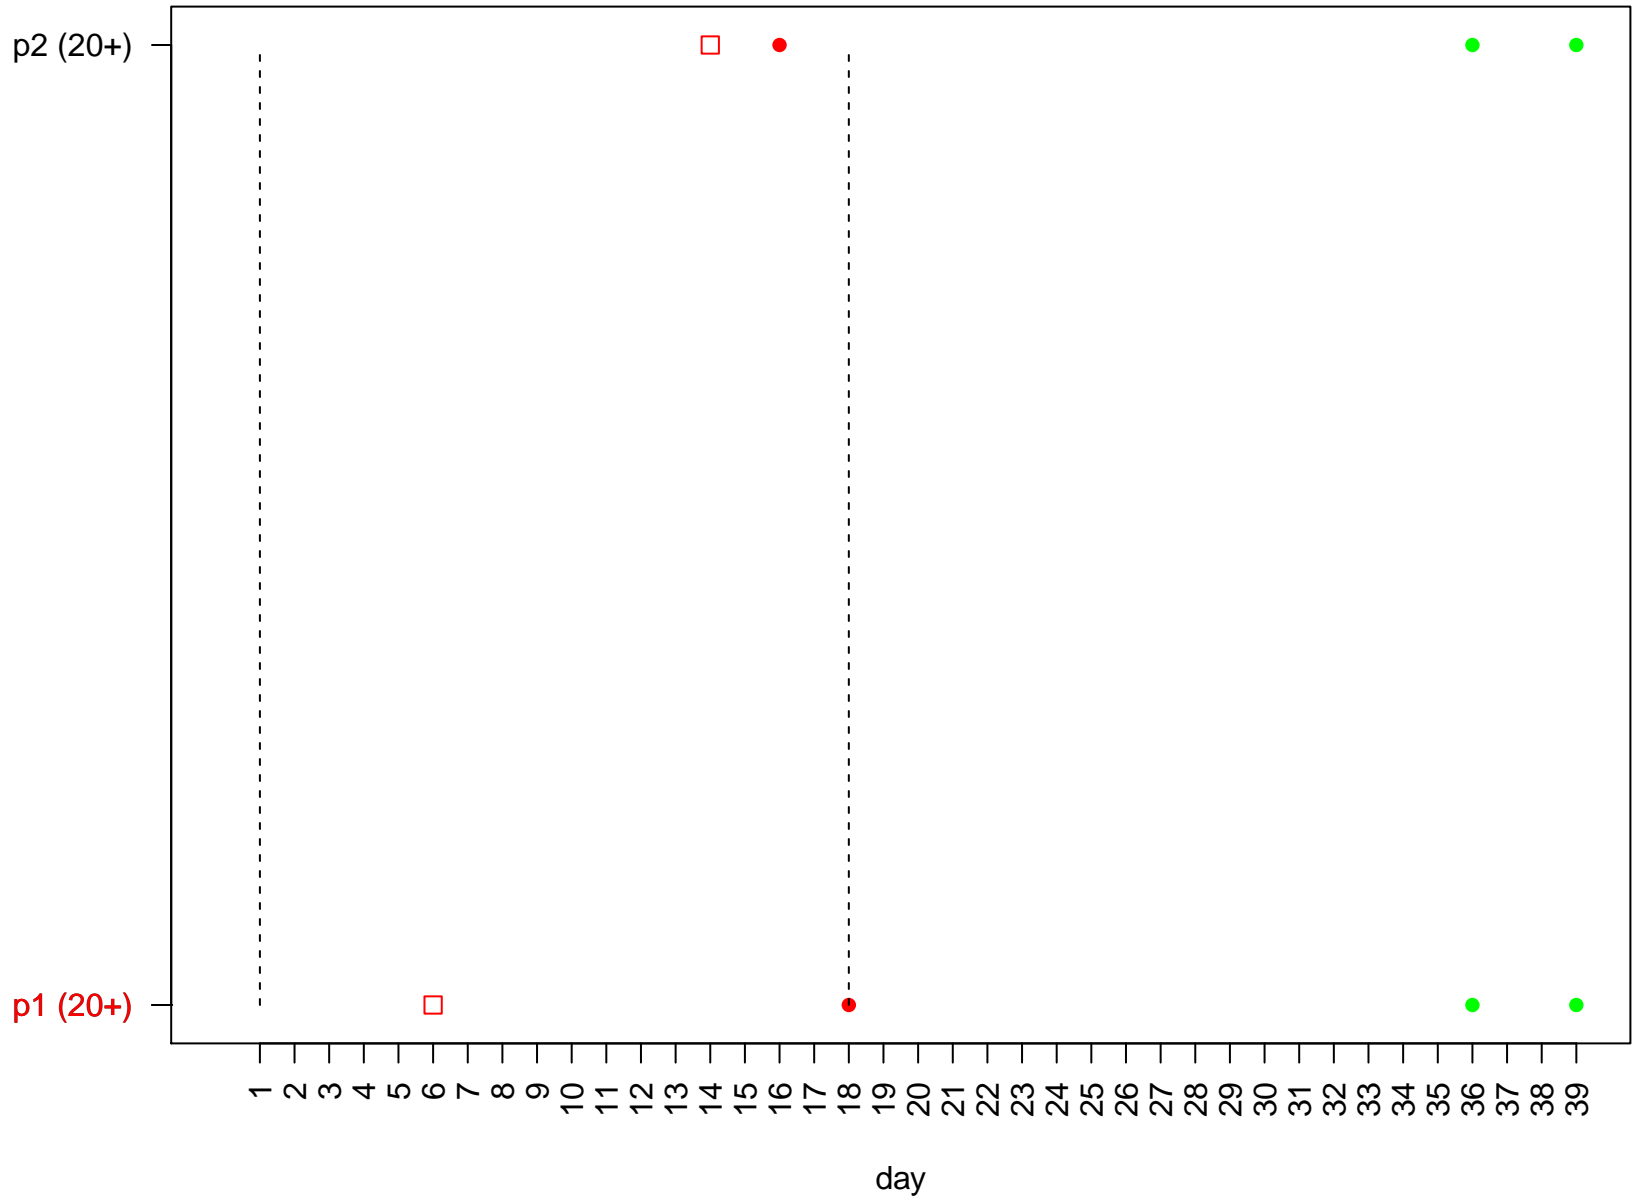

# Household 447

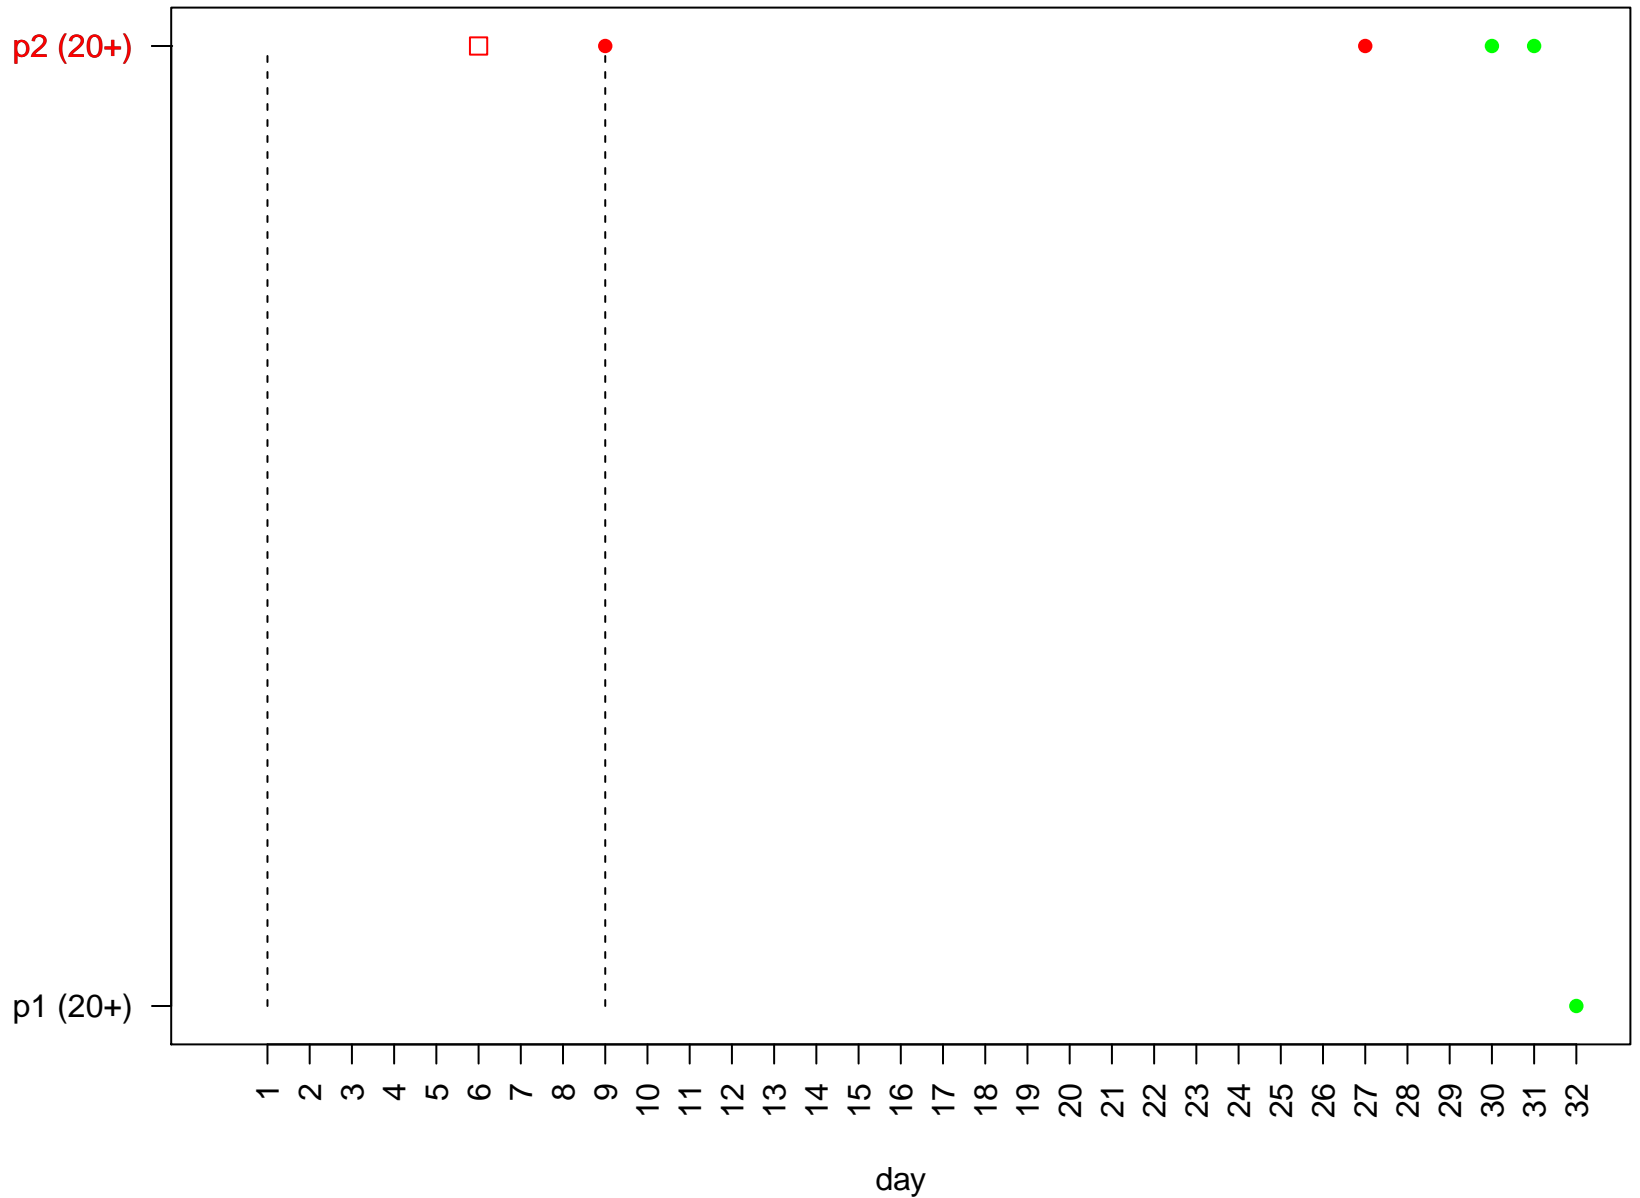

# Household 448

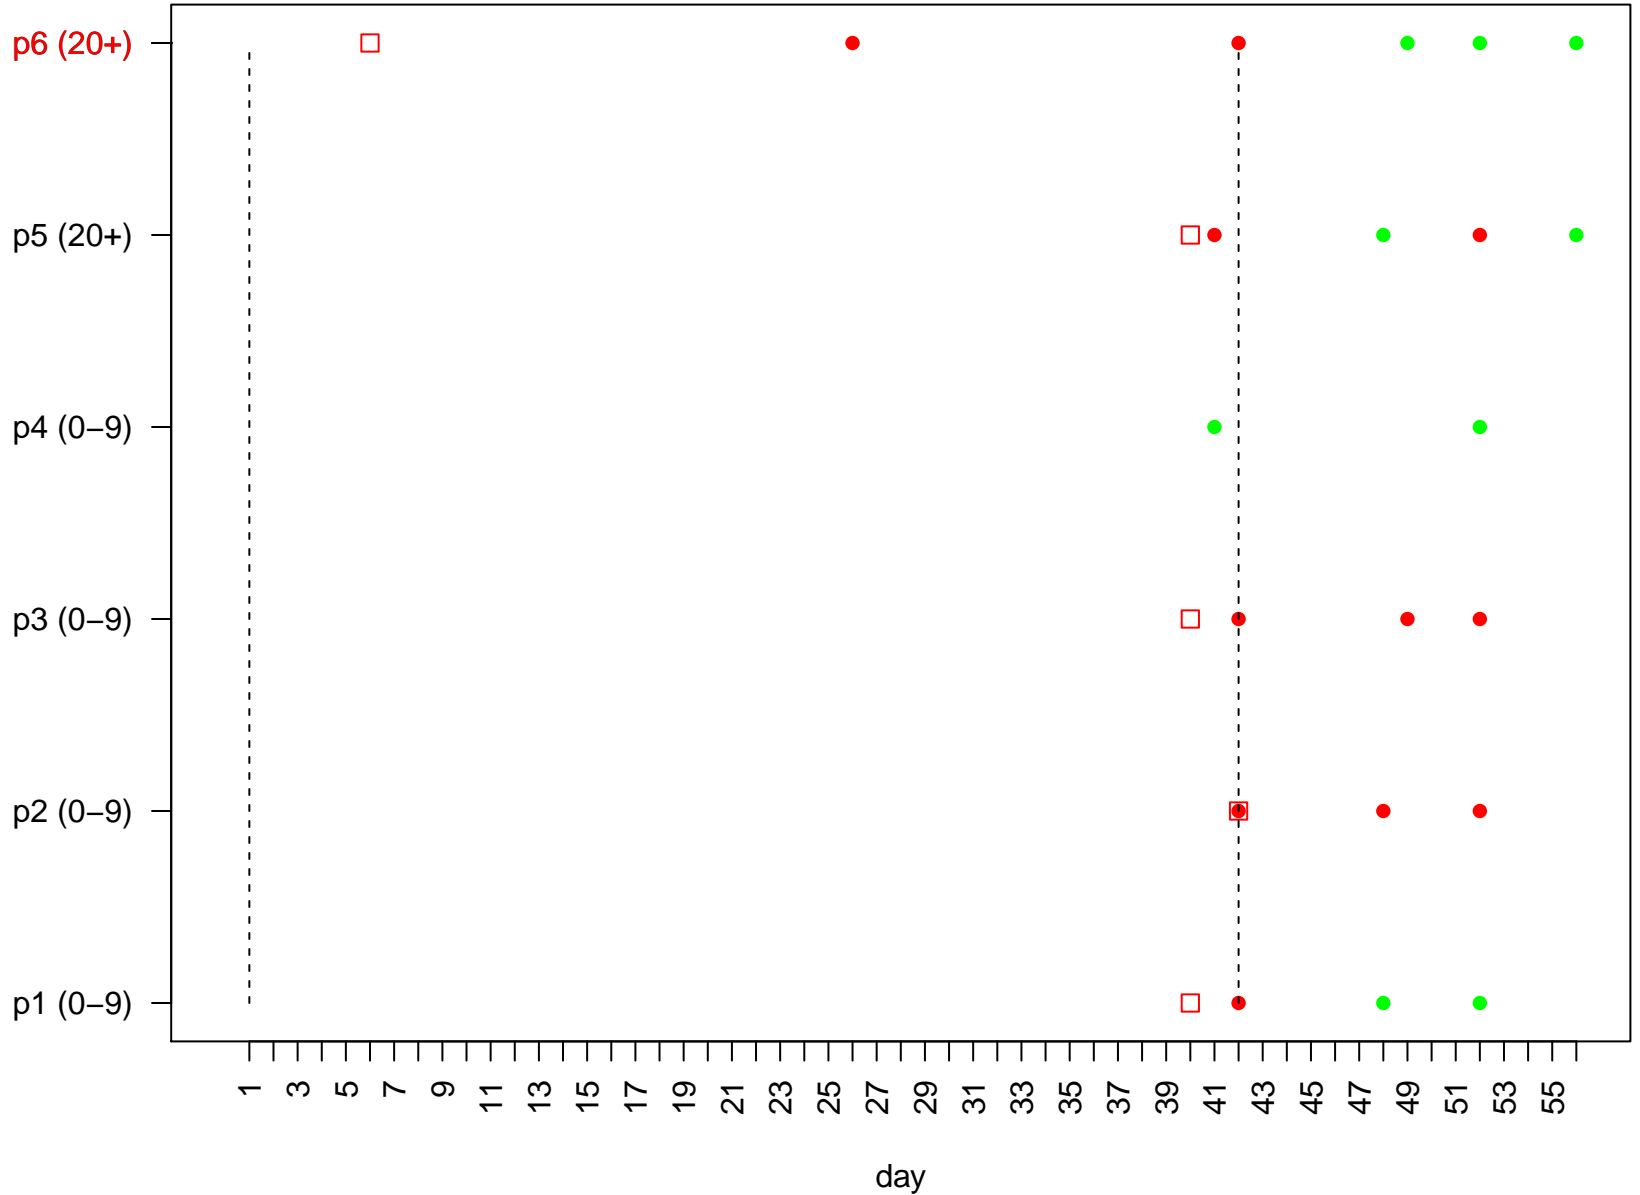

# Household 449

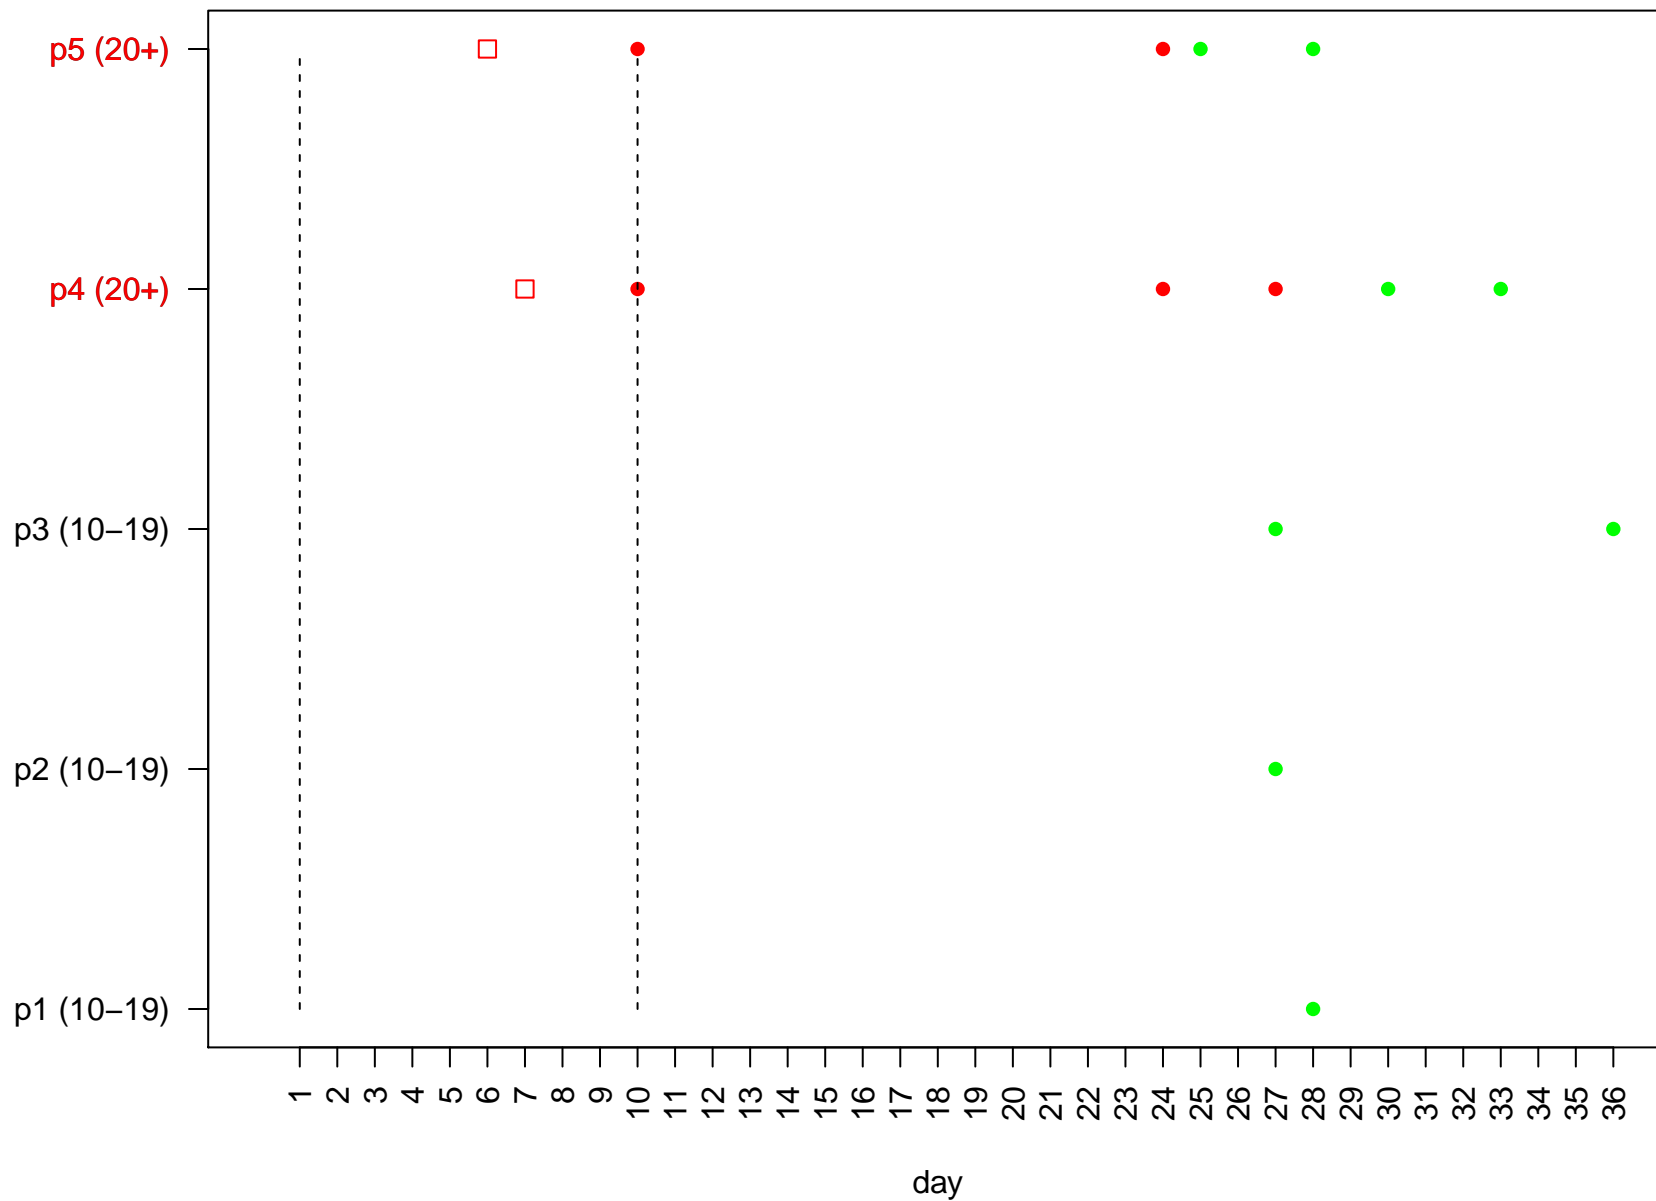



# Household 450

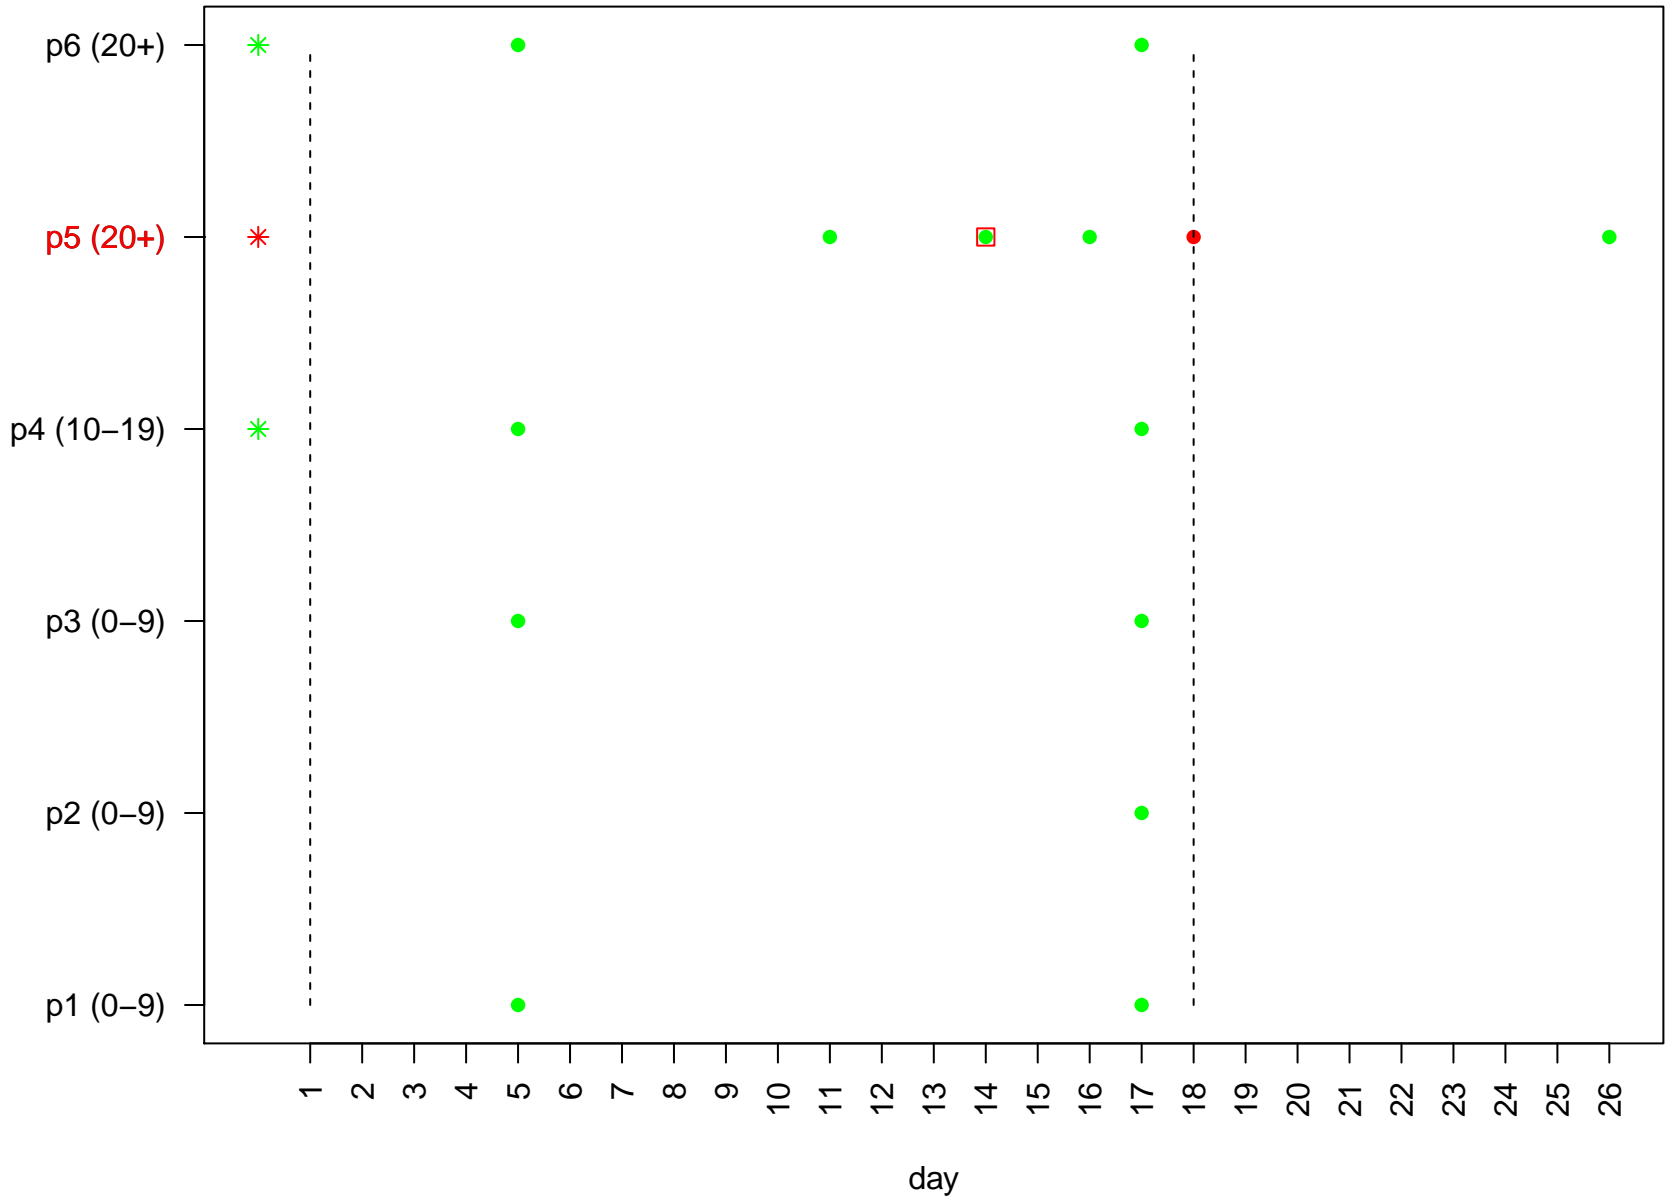

# Household 451

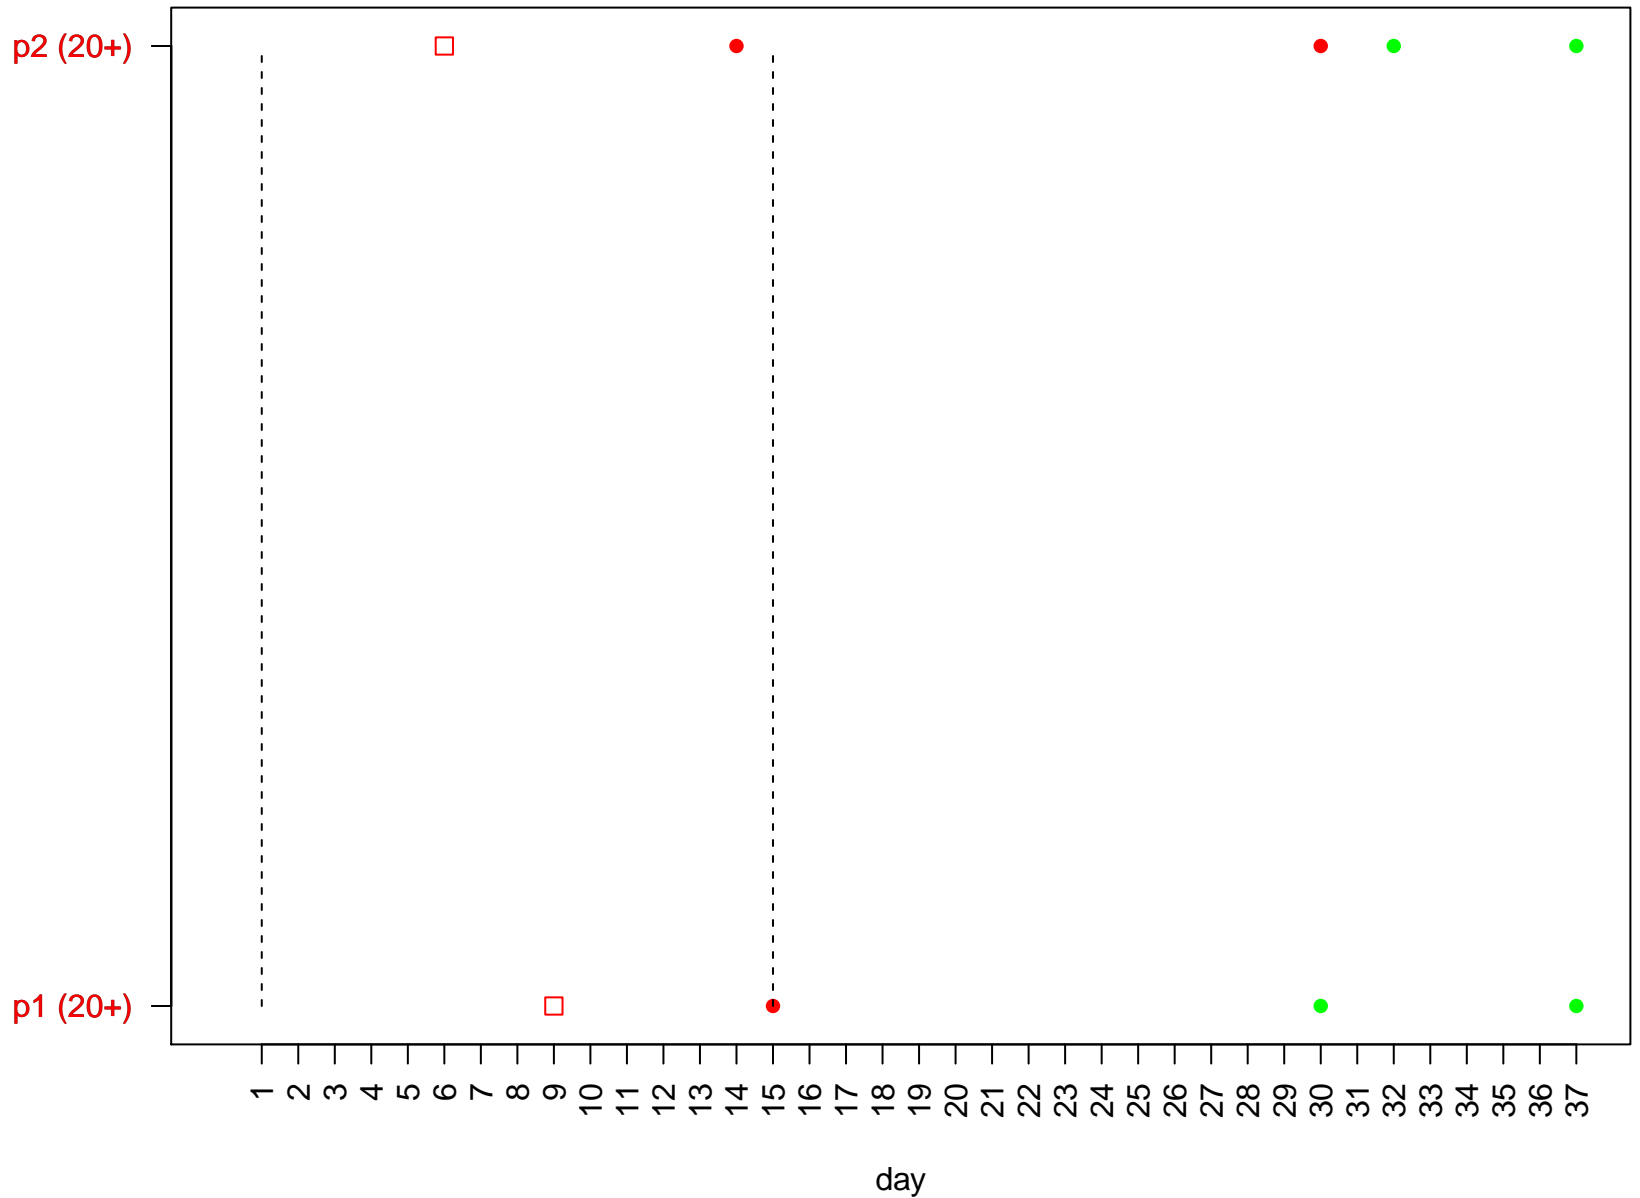

# Household 453

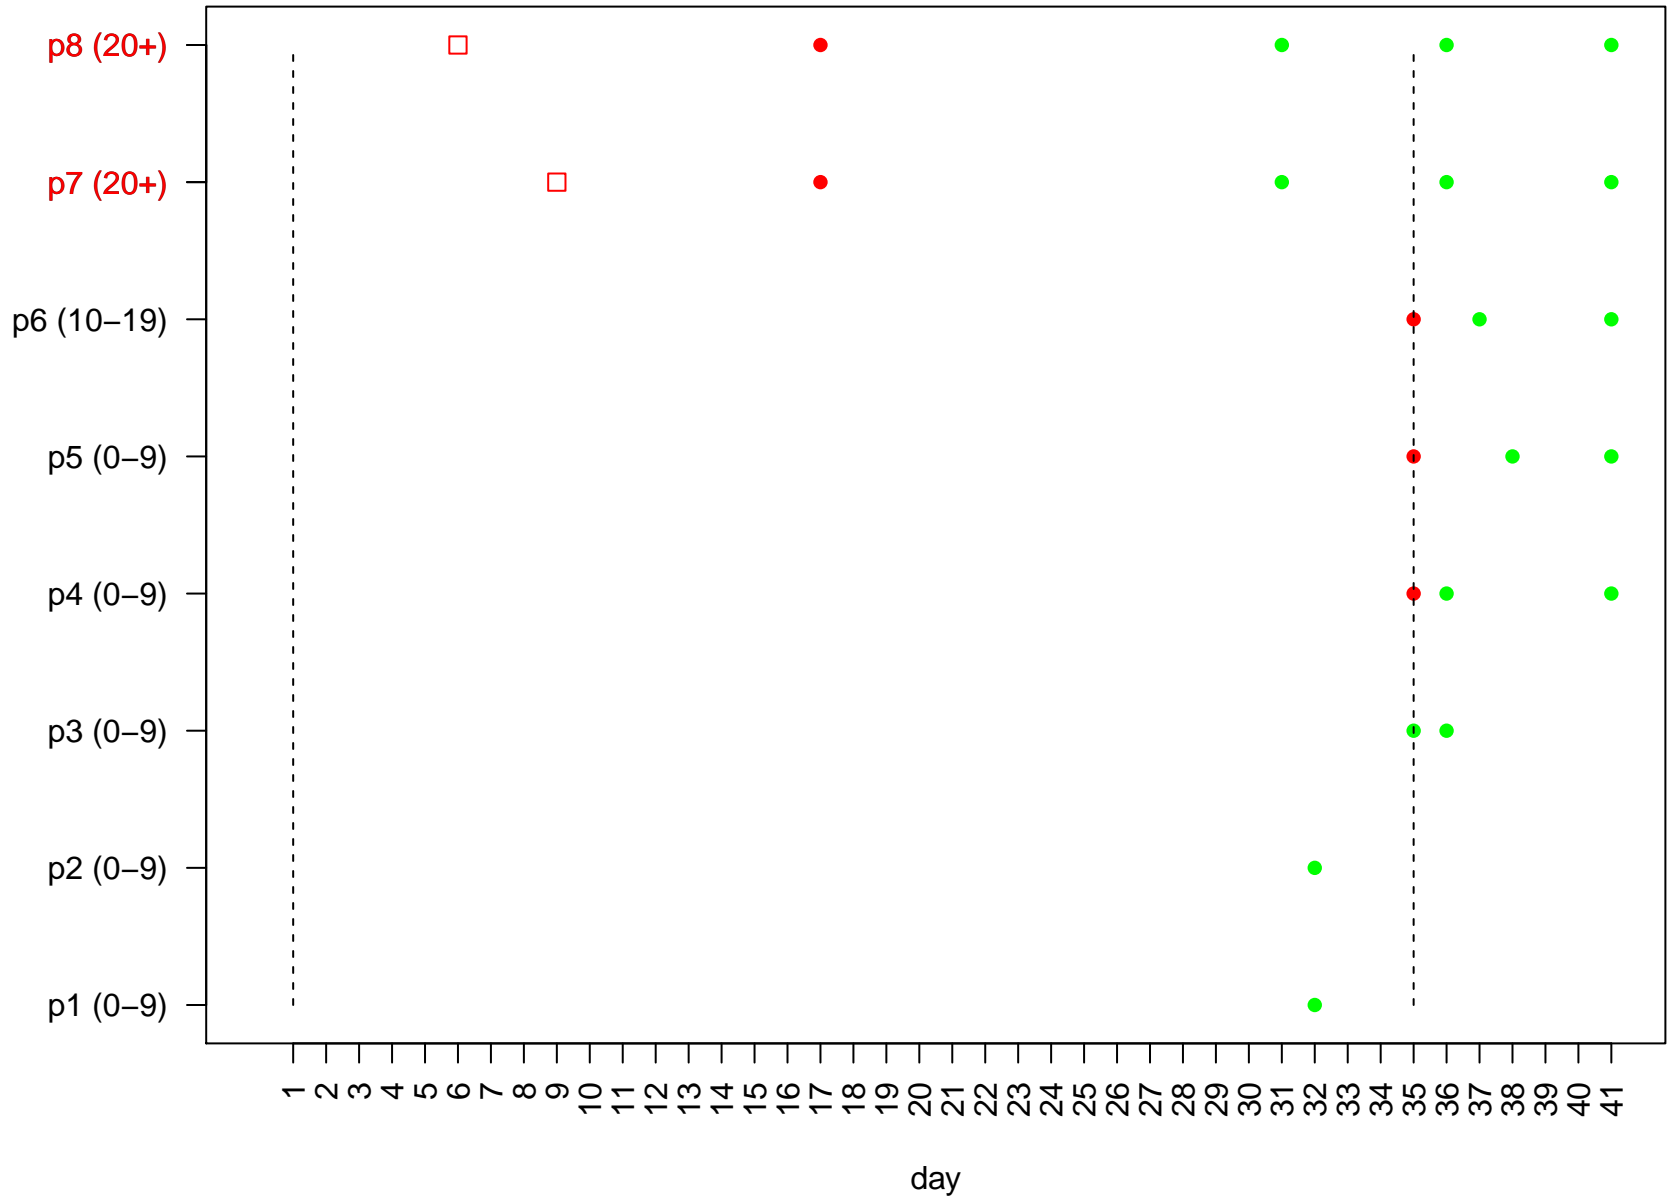

# Household 454

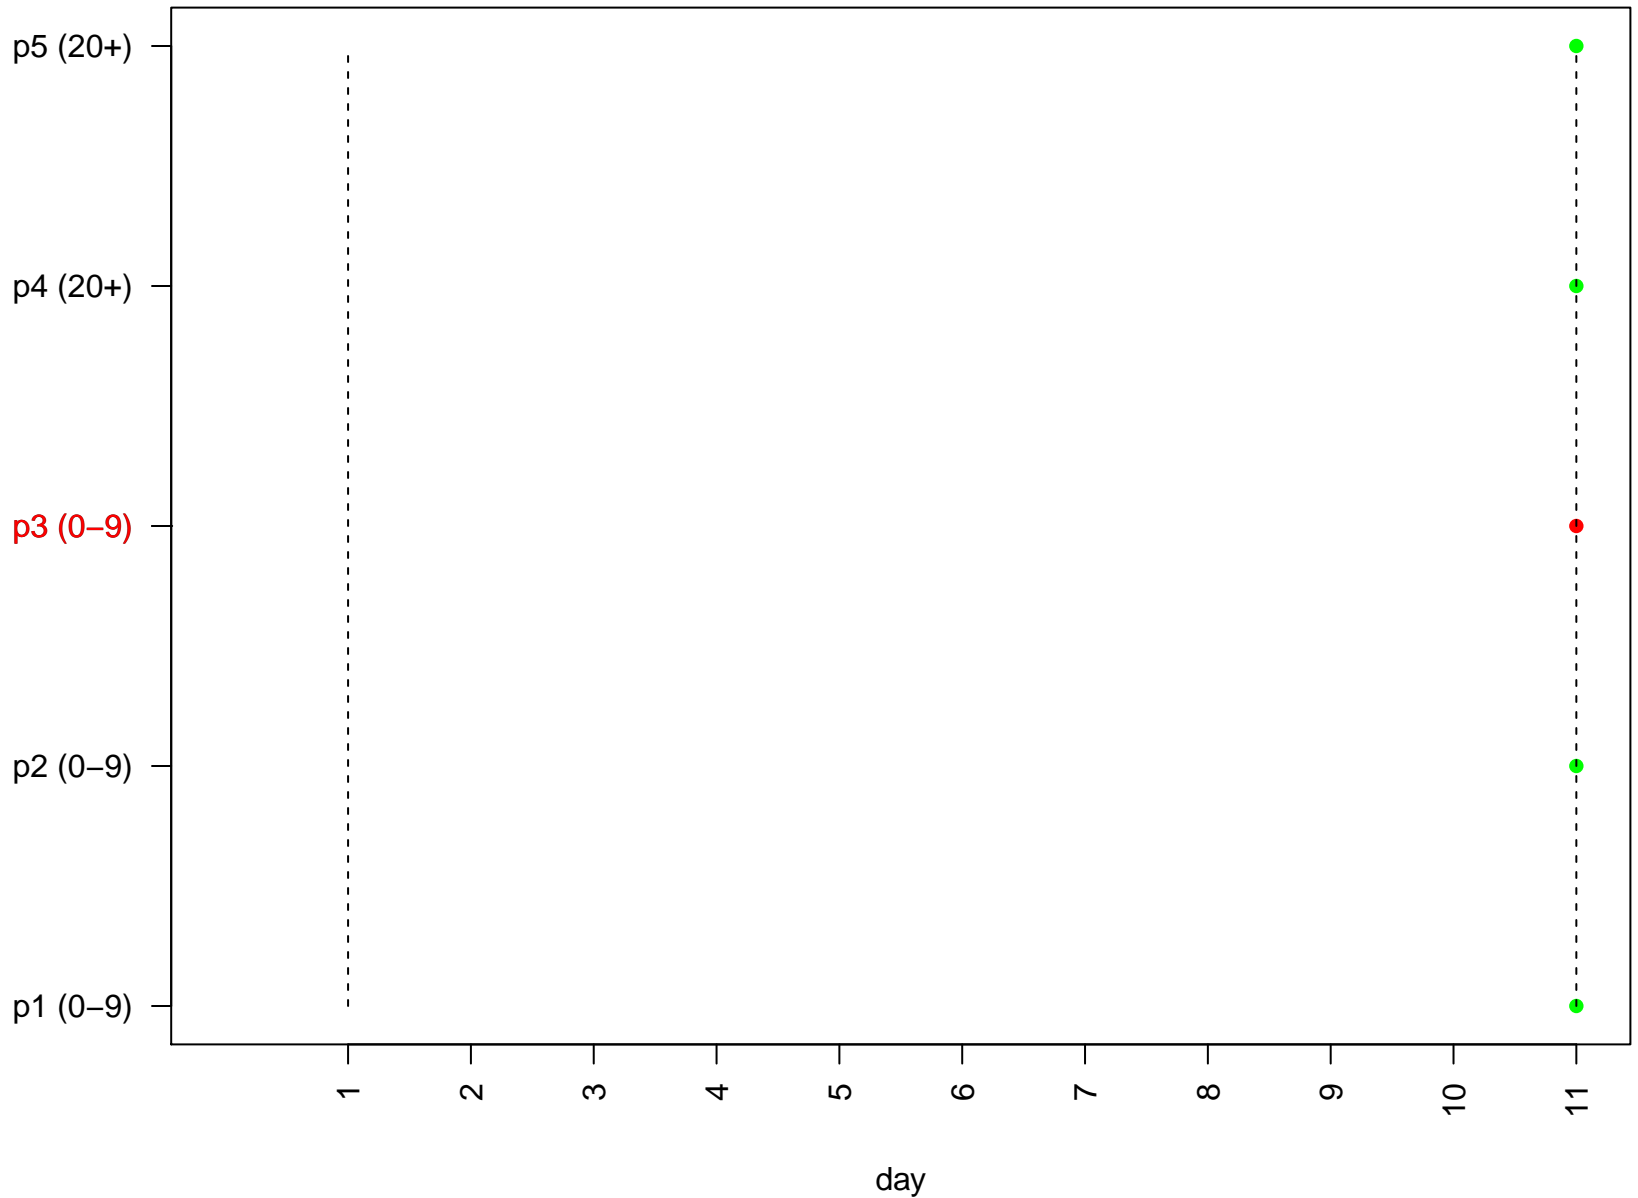

# Household 455

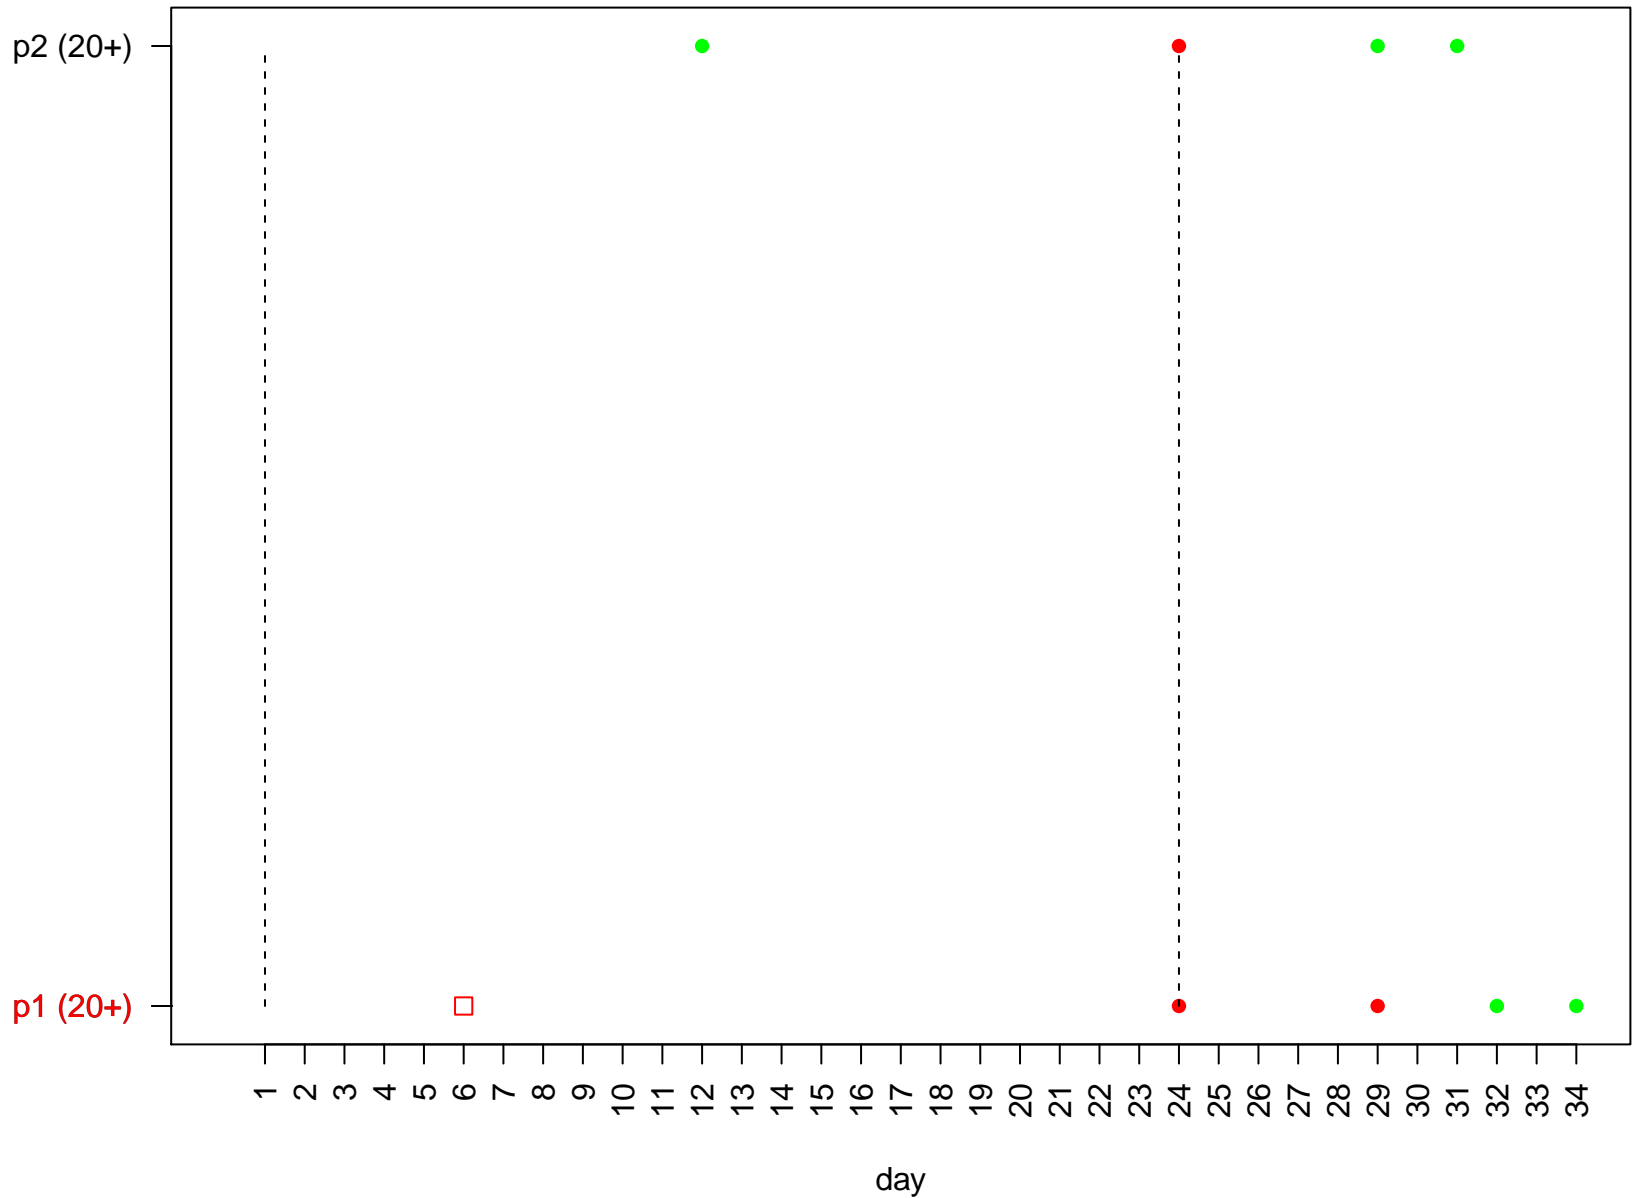

# Household 456

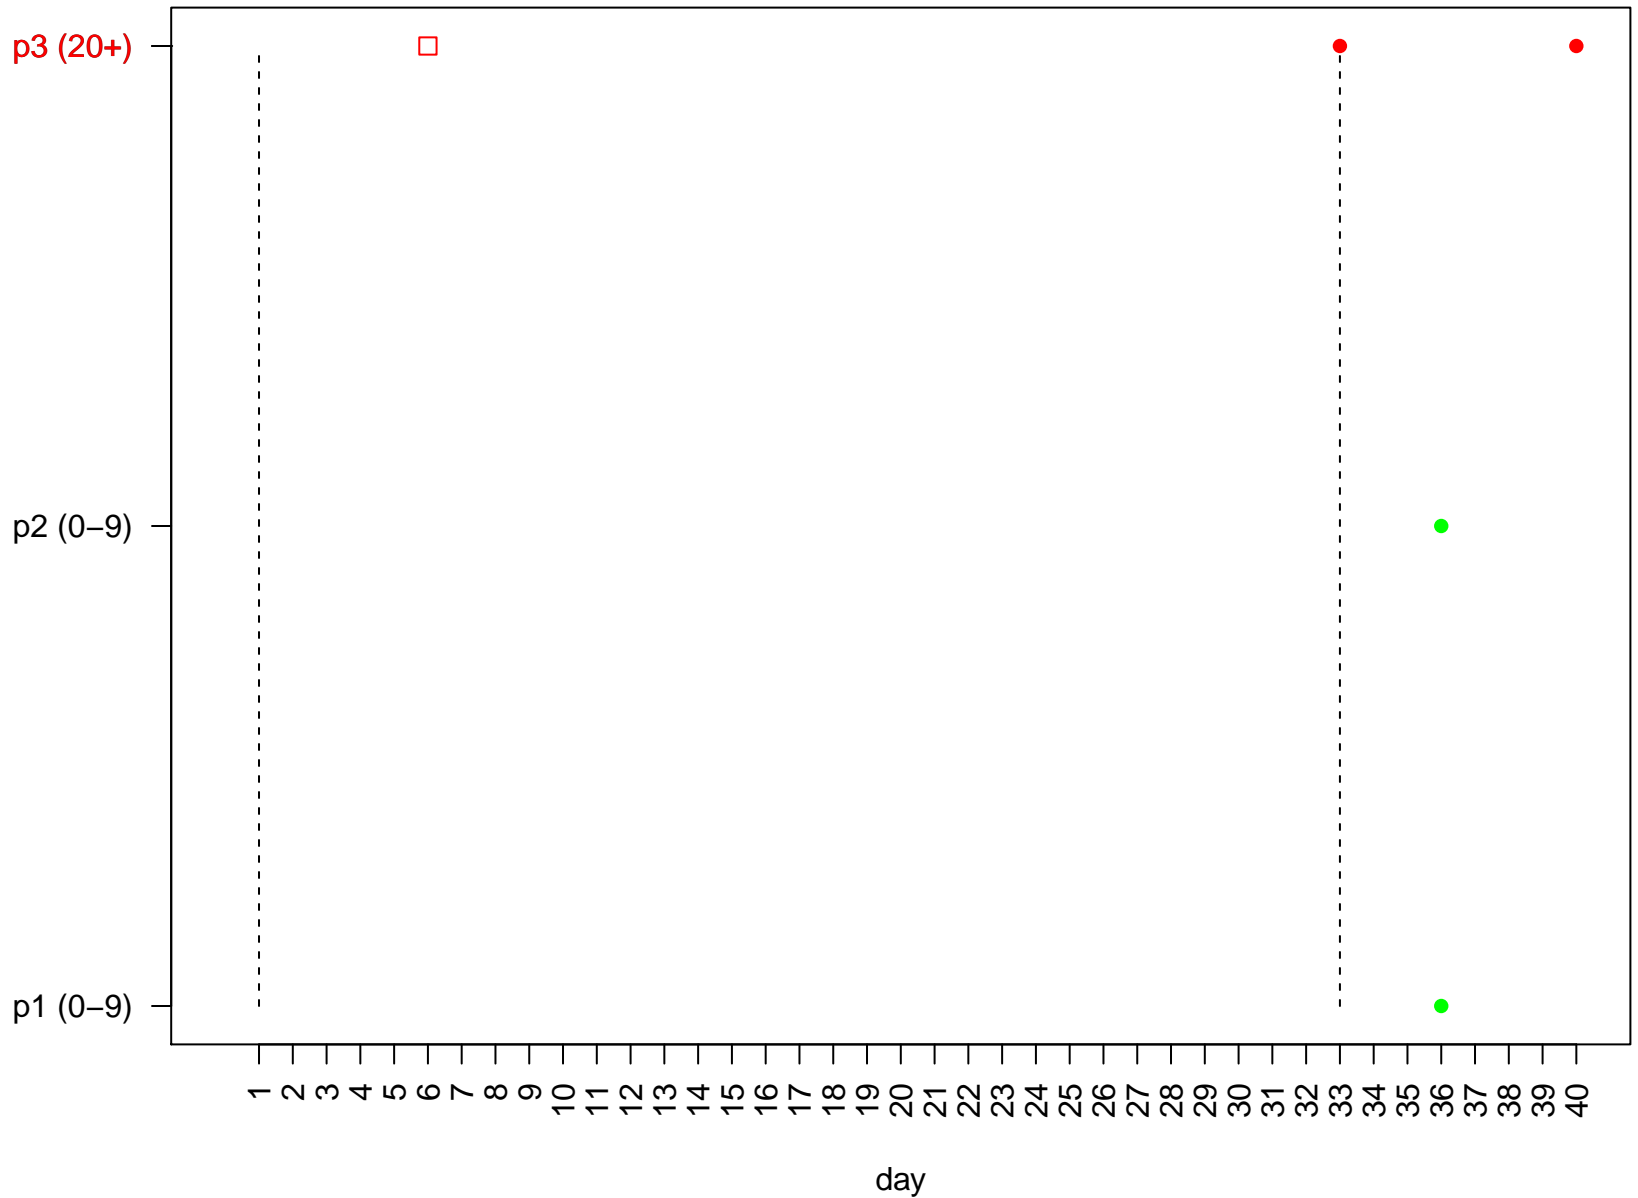

# Household 457

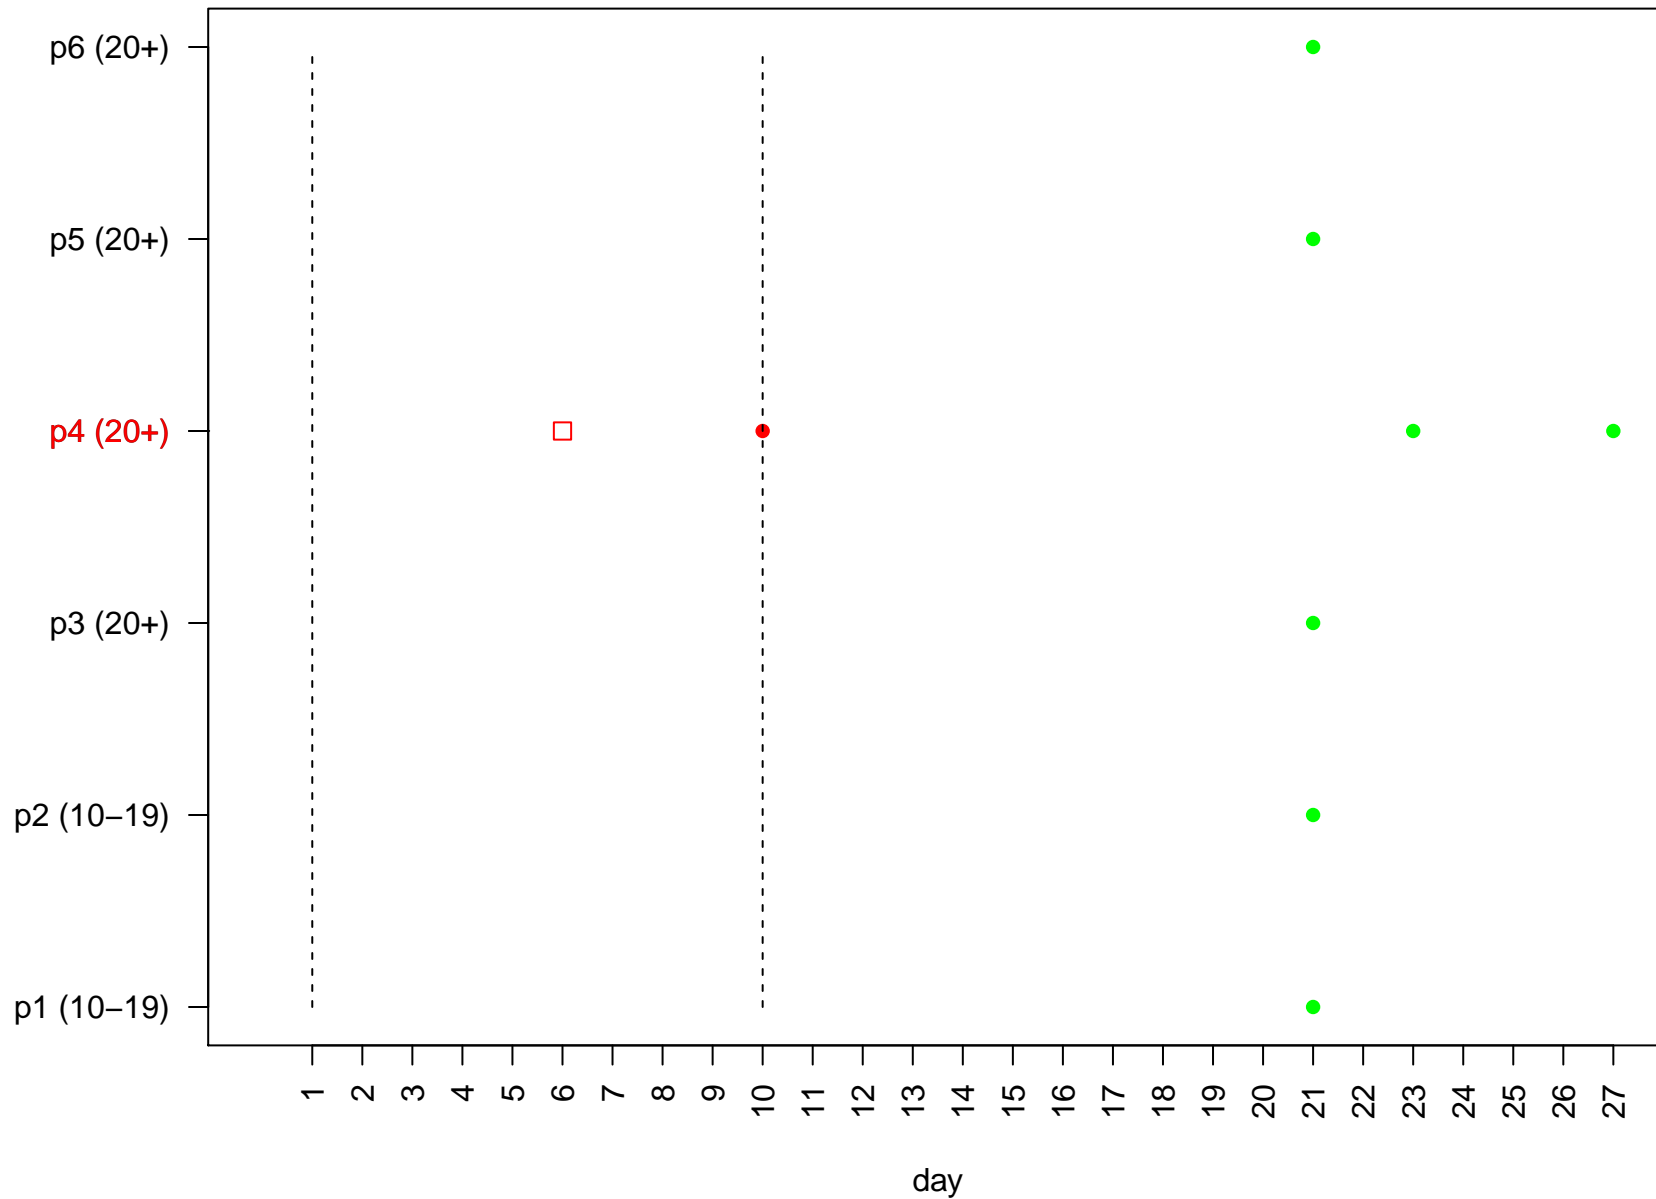





# Household 459

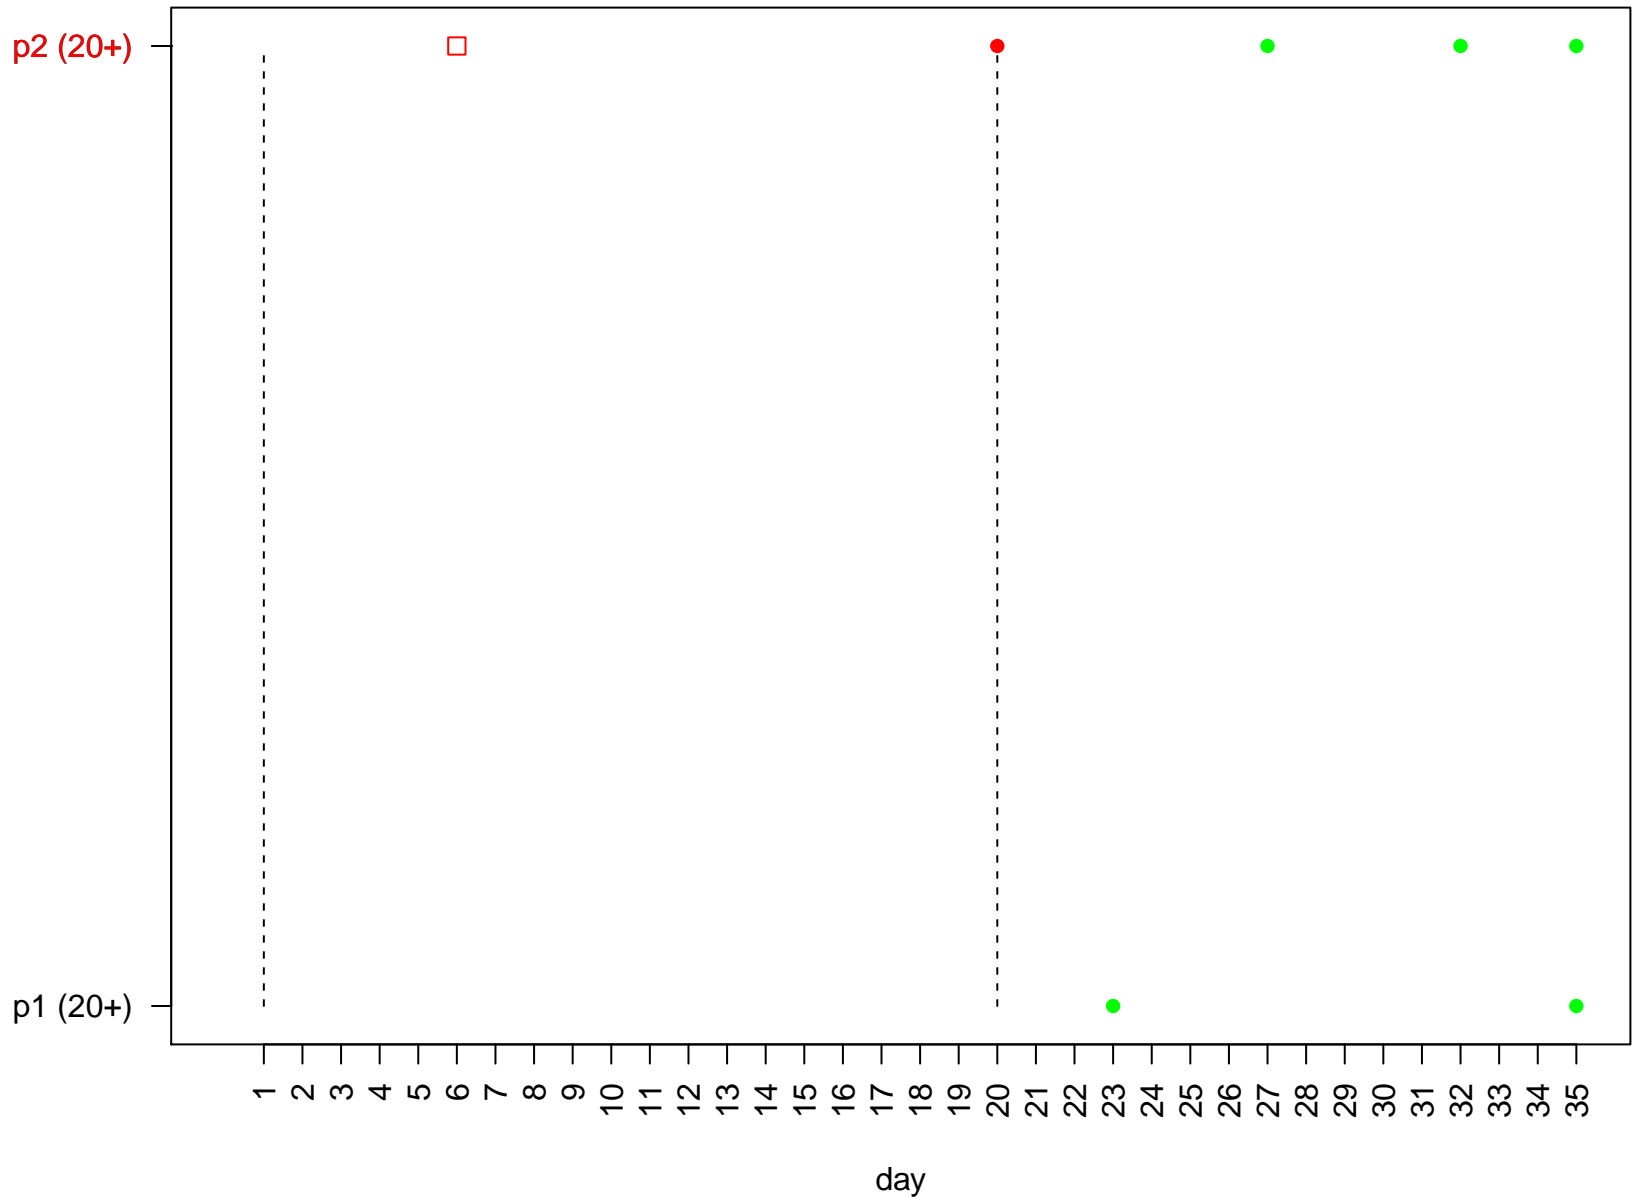

# Household 460

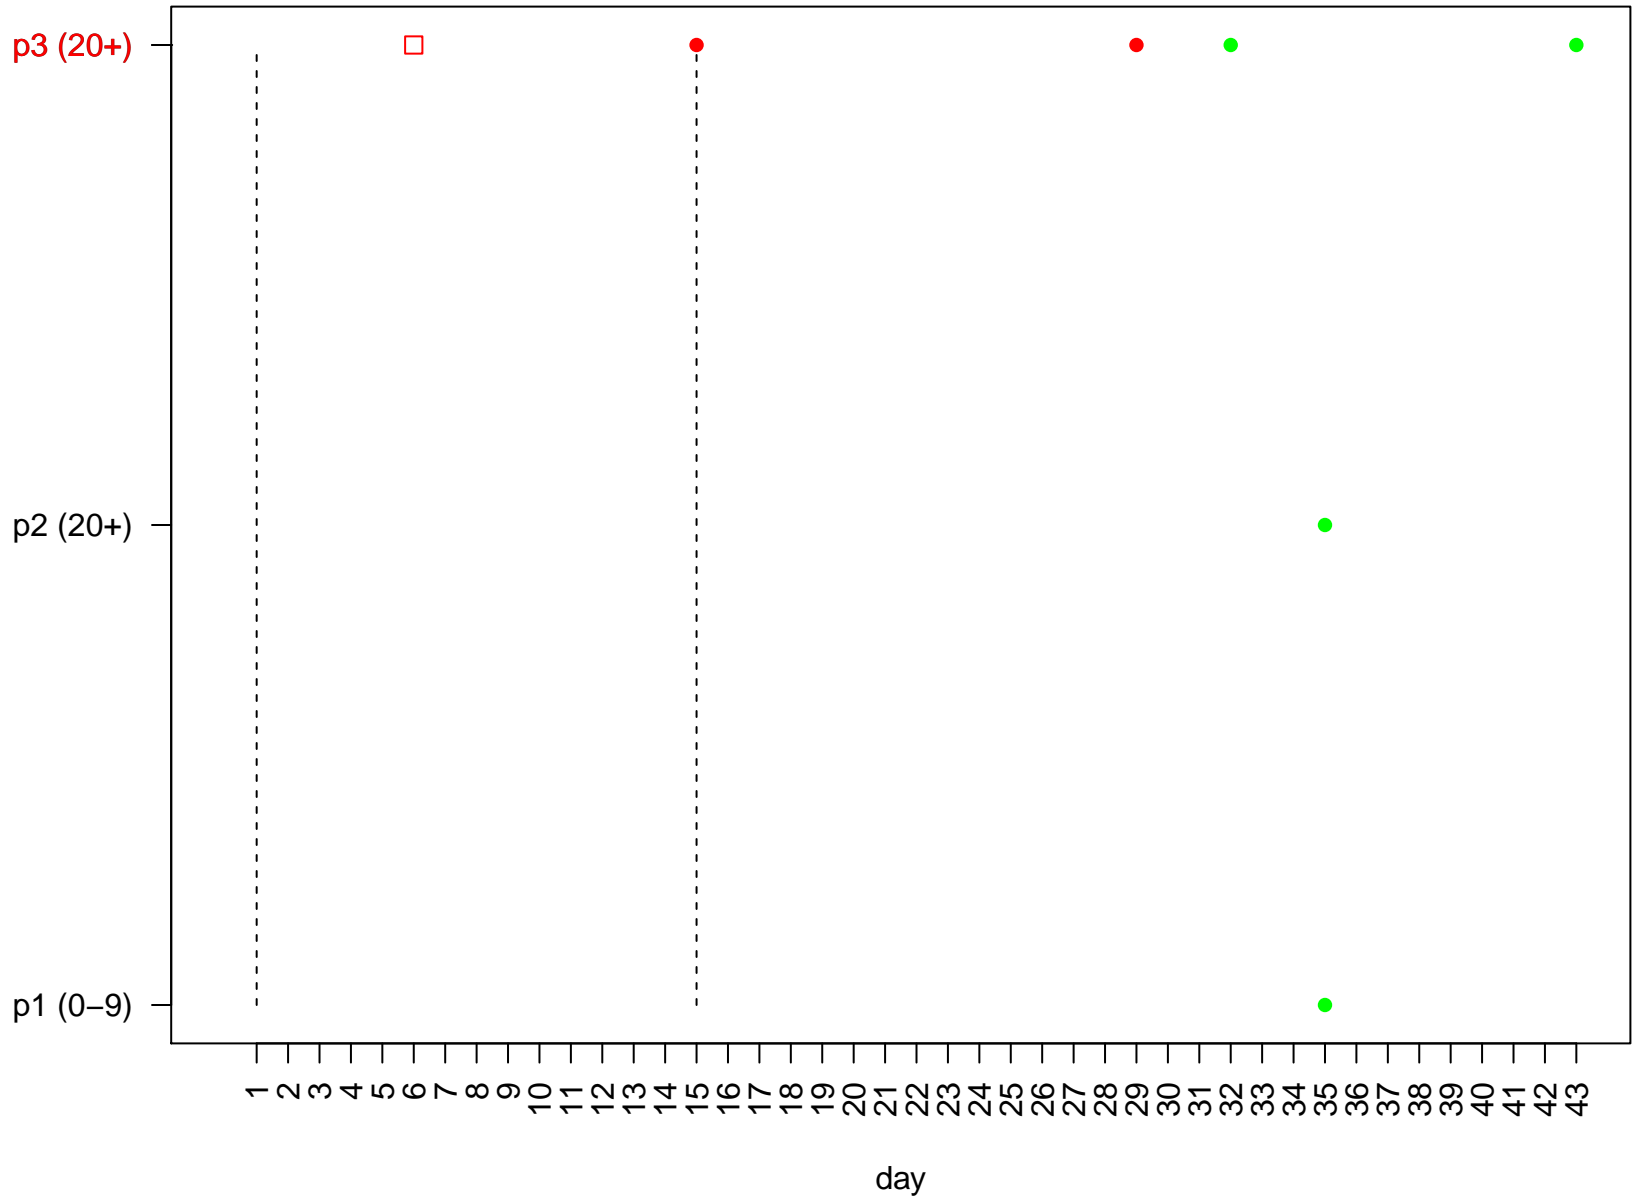

# Household 461

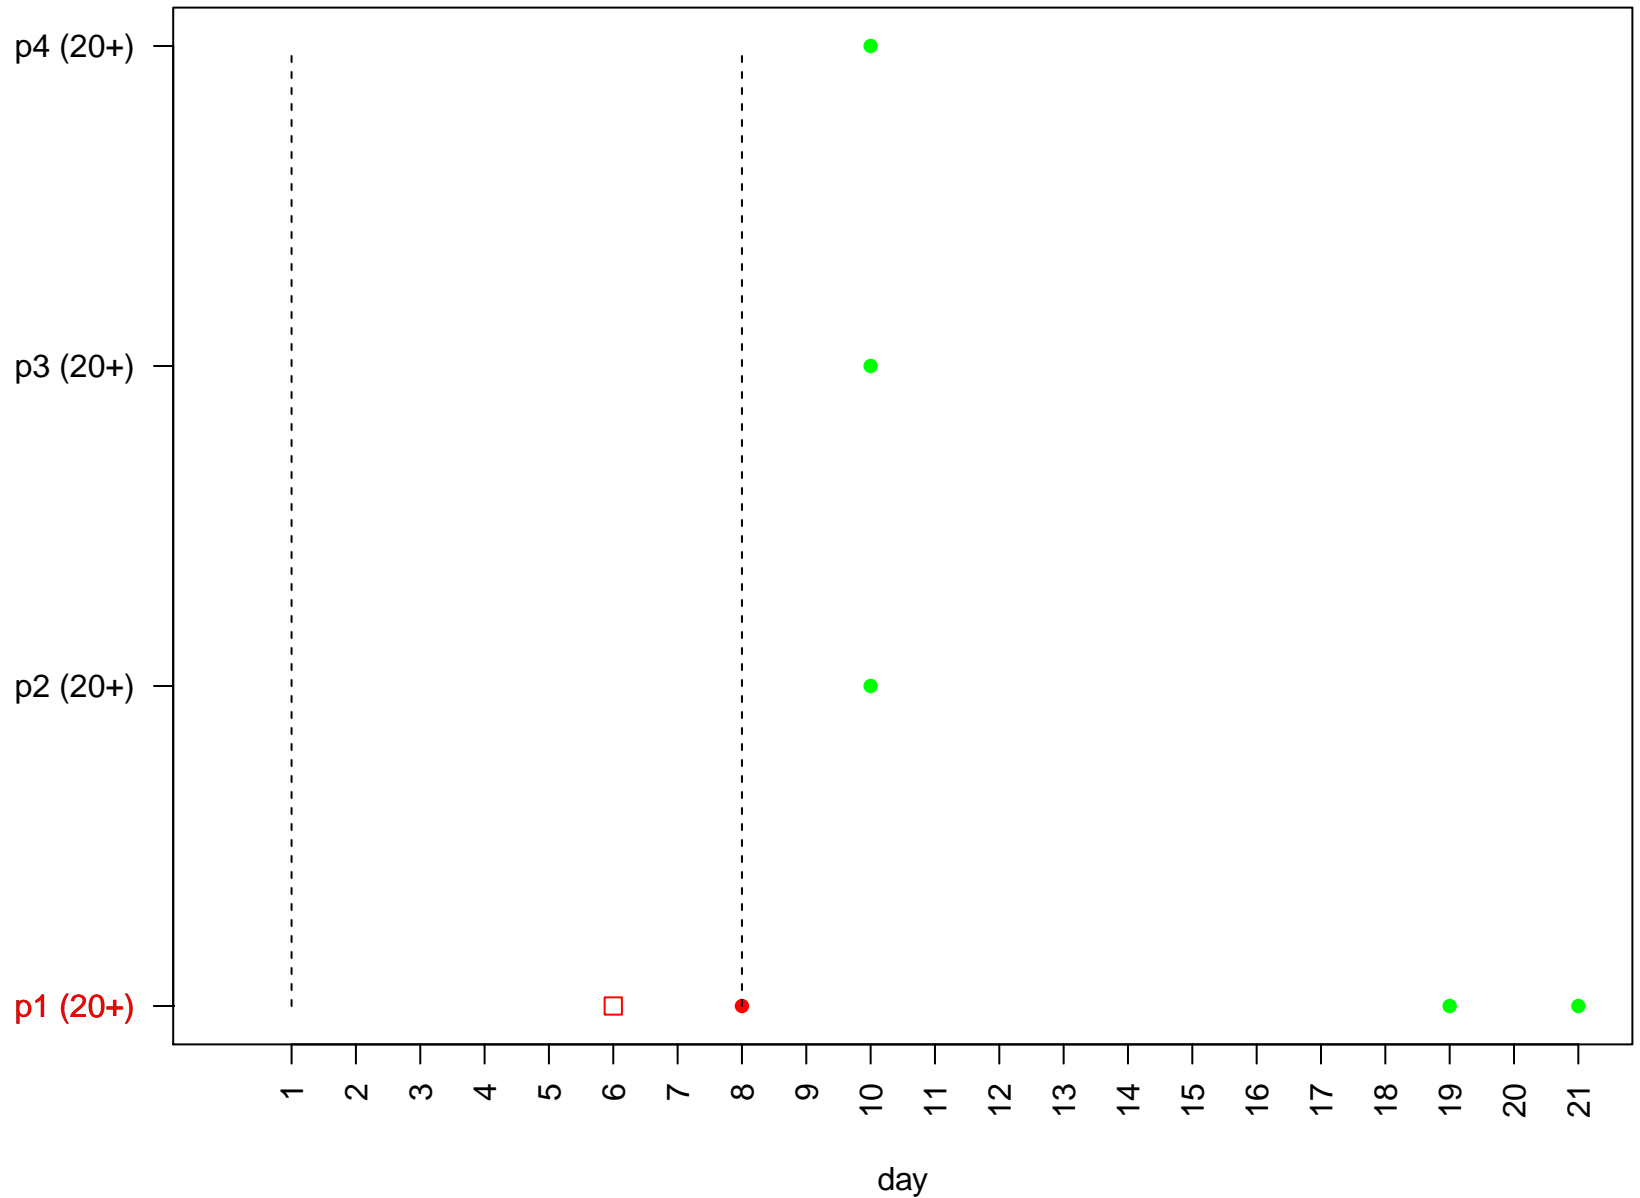

# Household 462

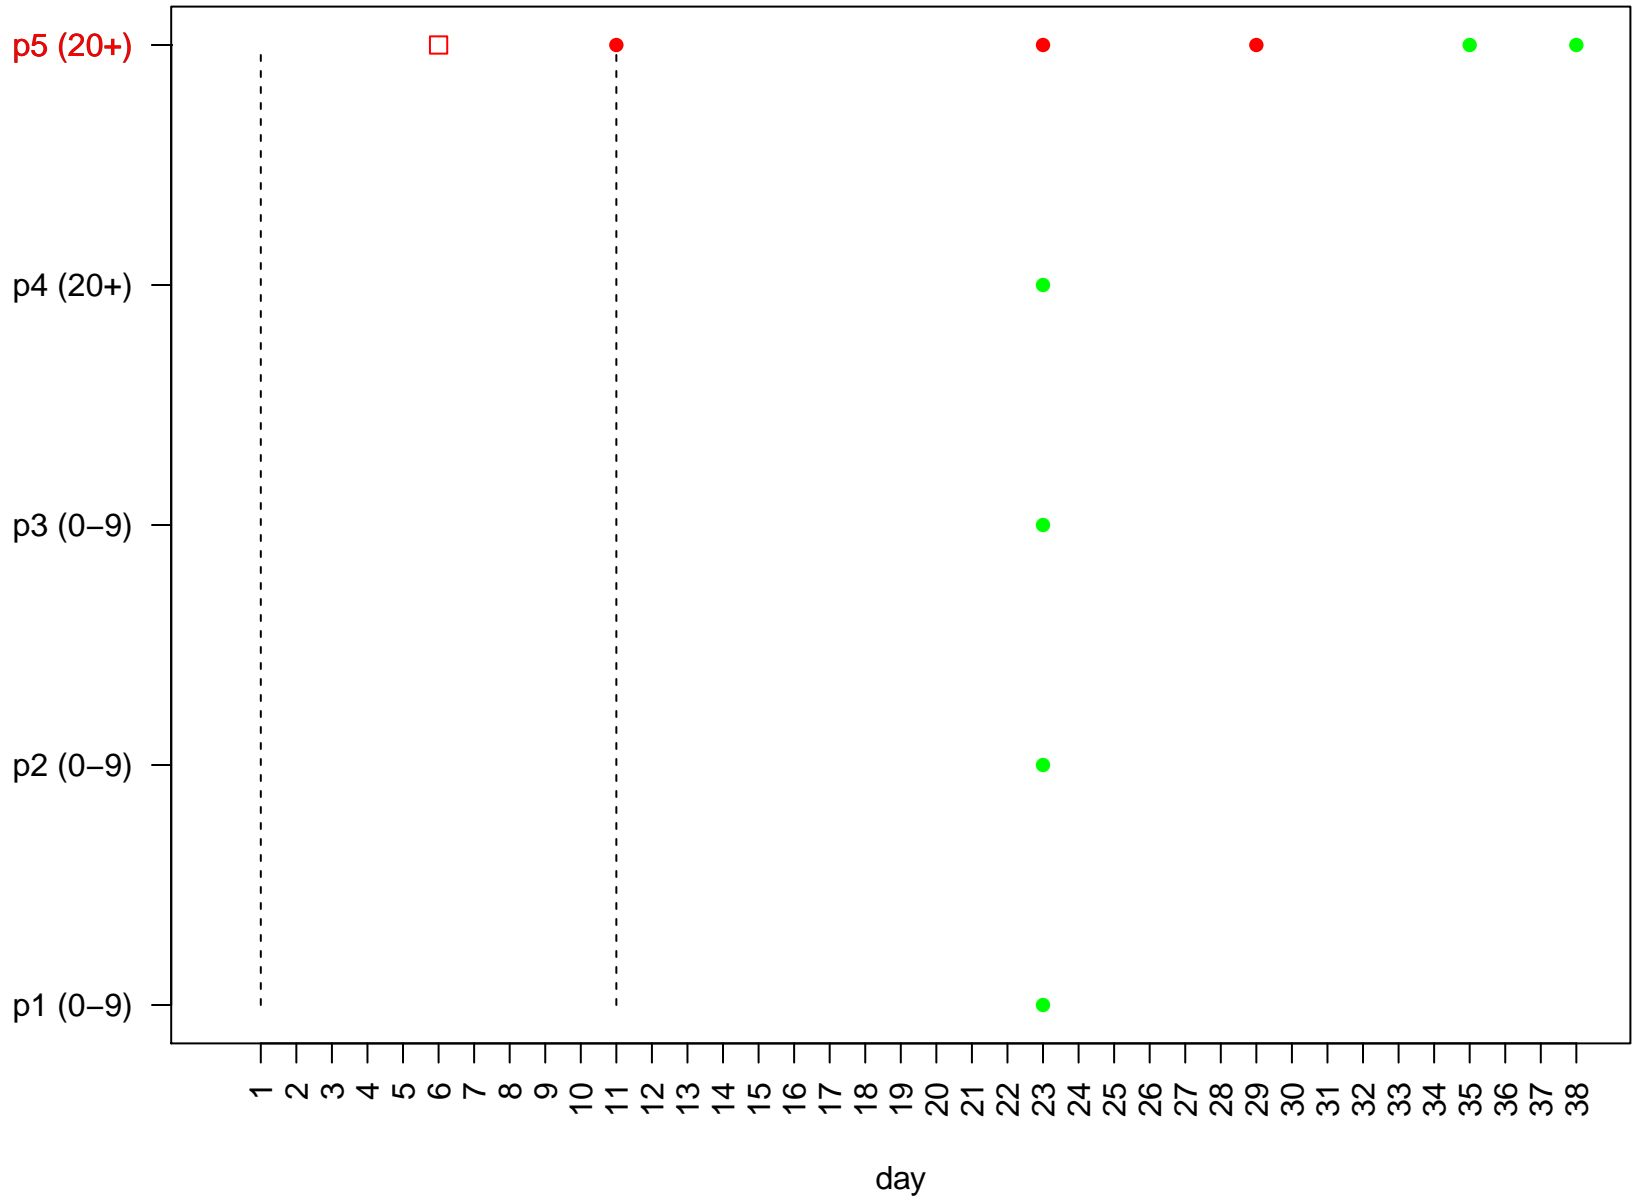

# Household 463

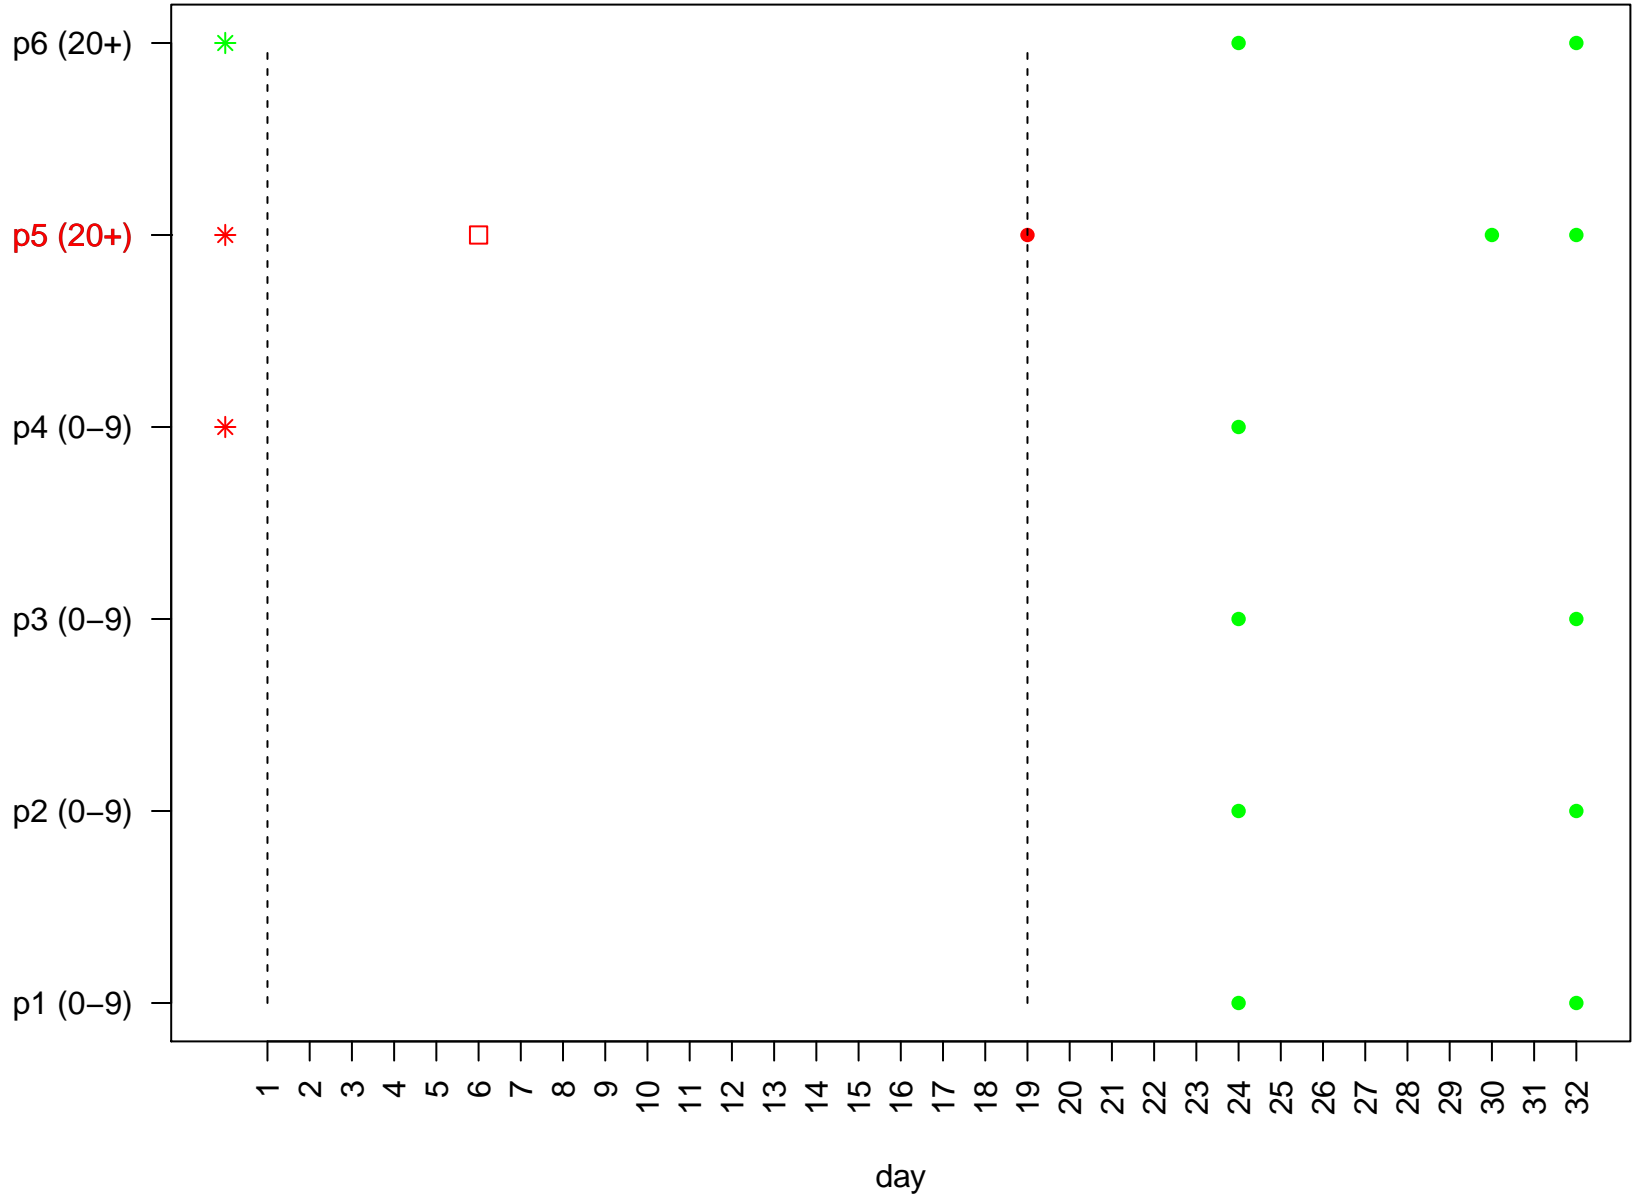



# Household 465

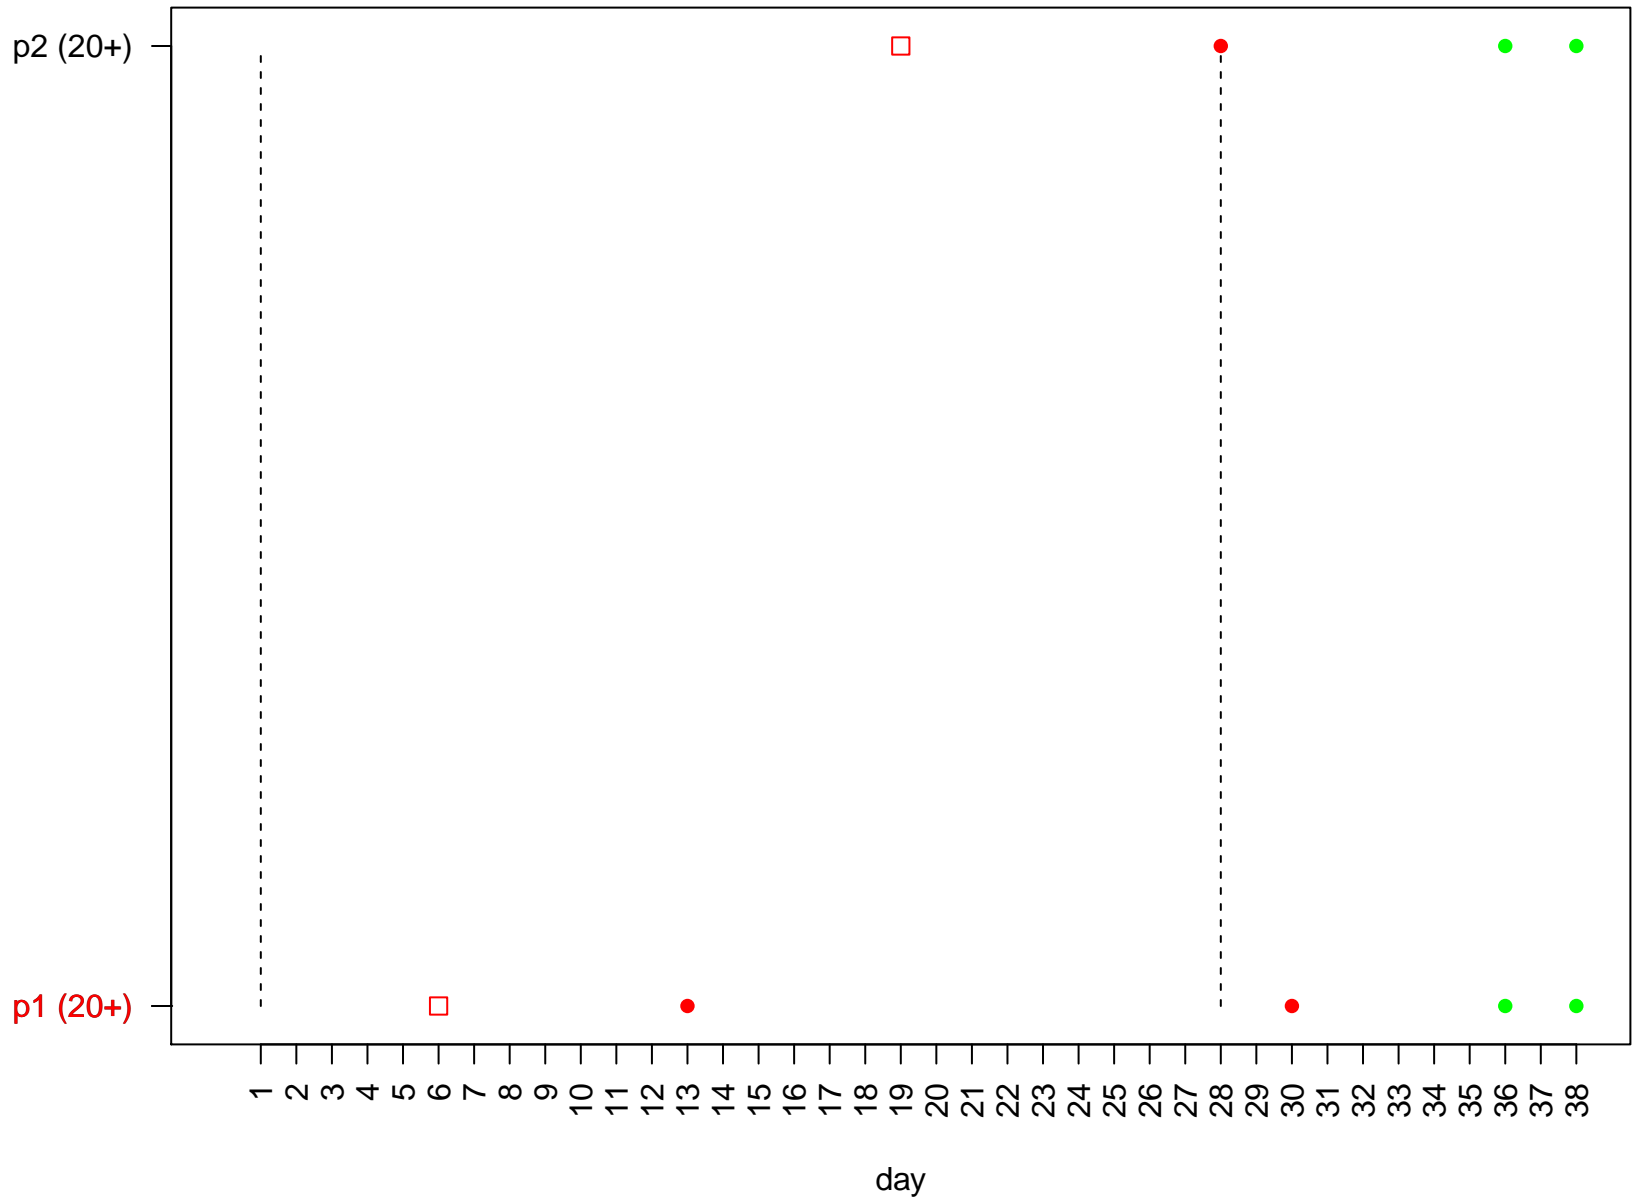

# Household 466

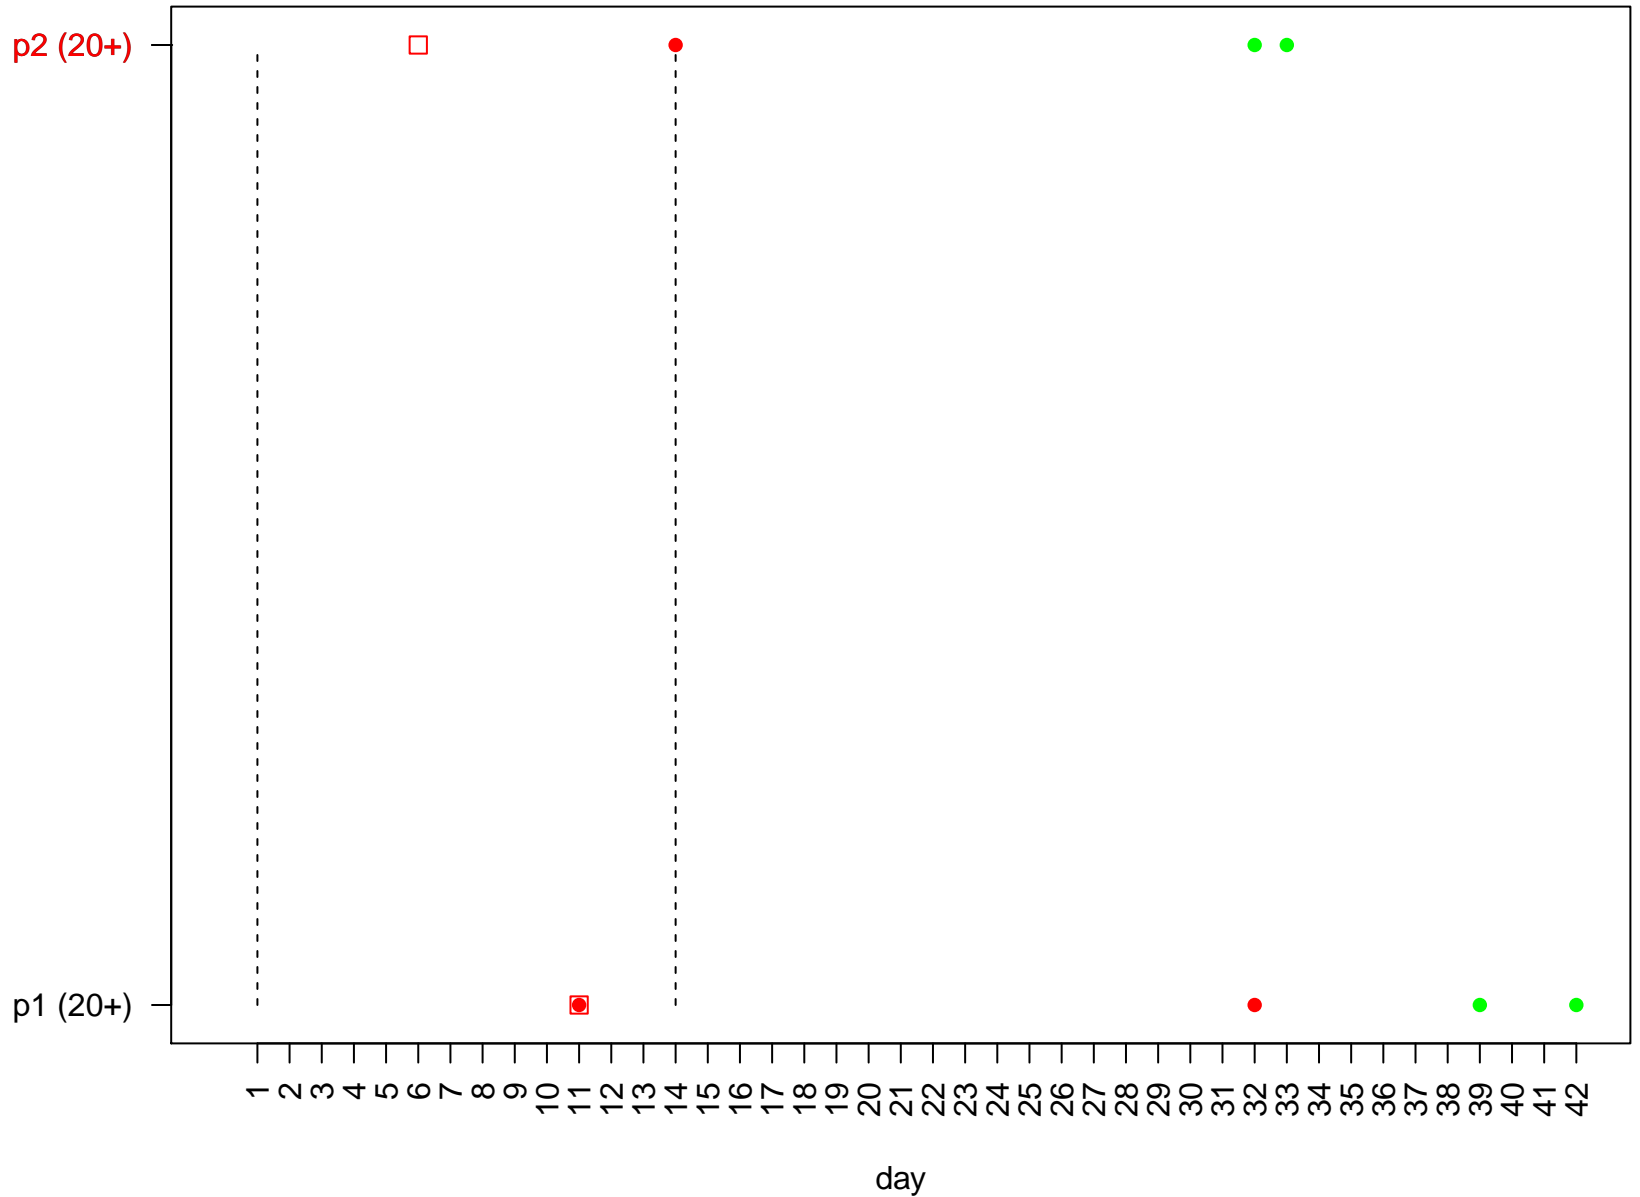



# Household 467

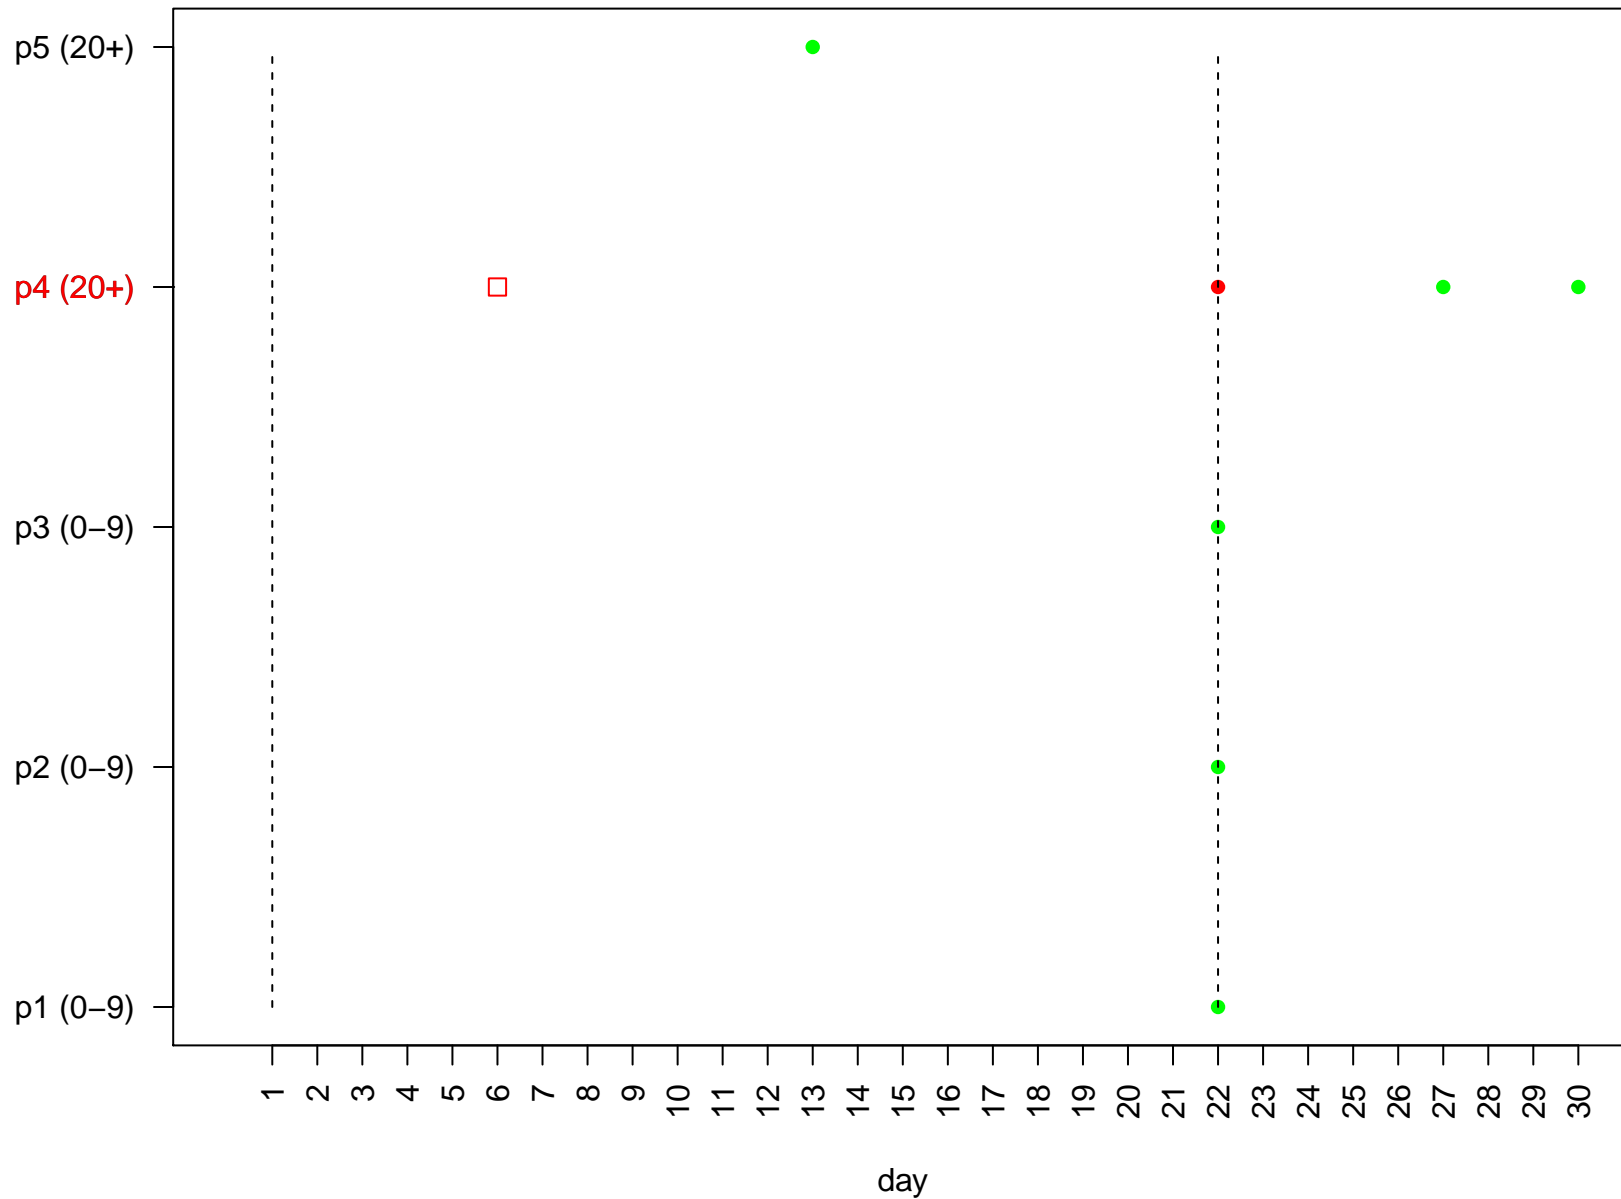

# Household 468

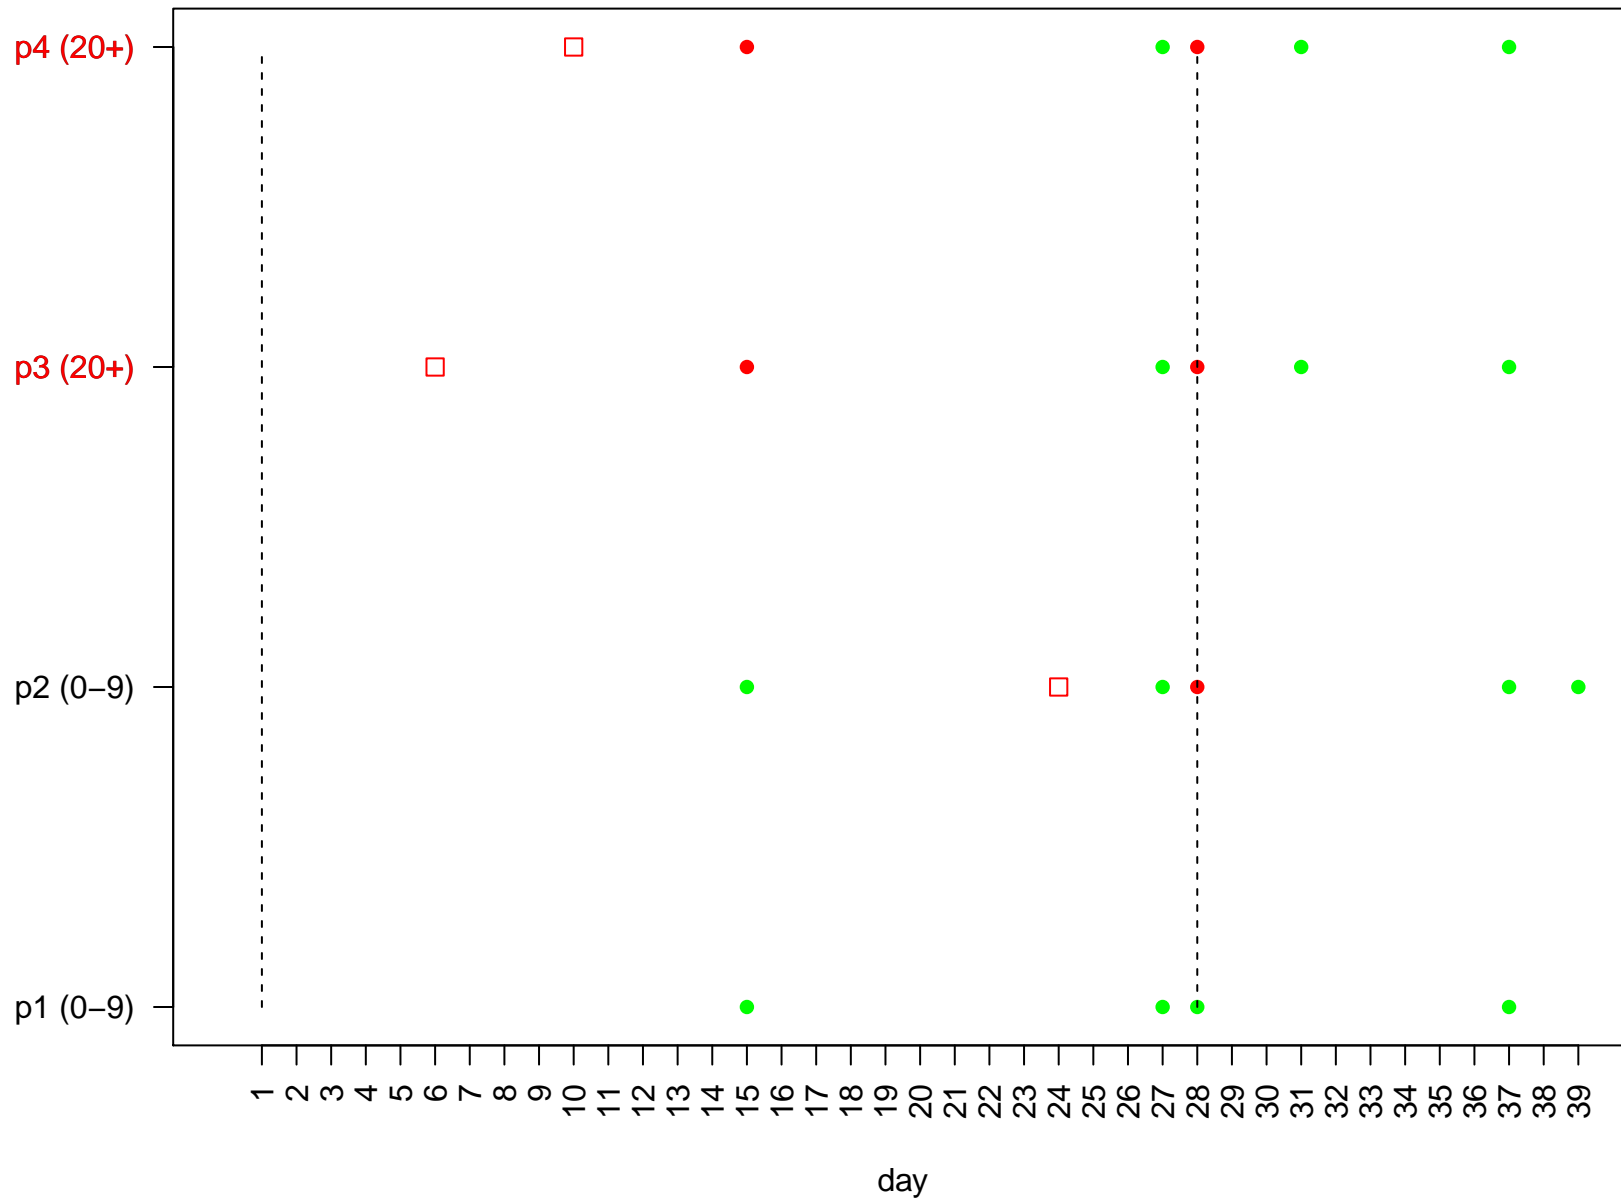

# Household 470

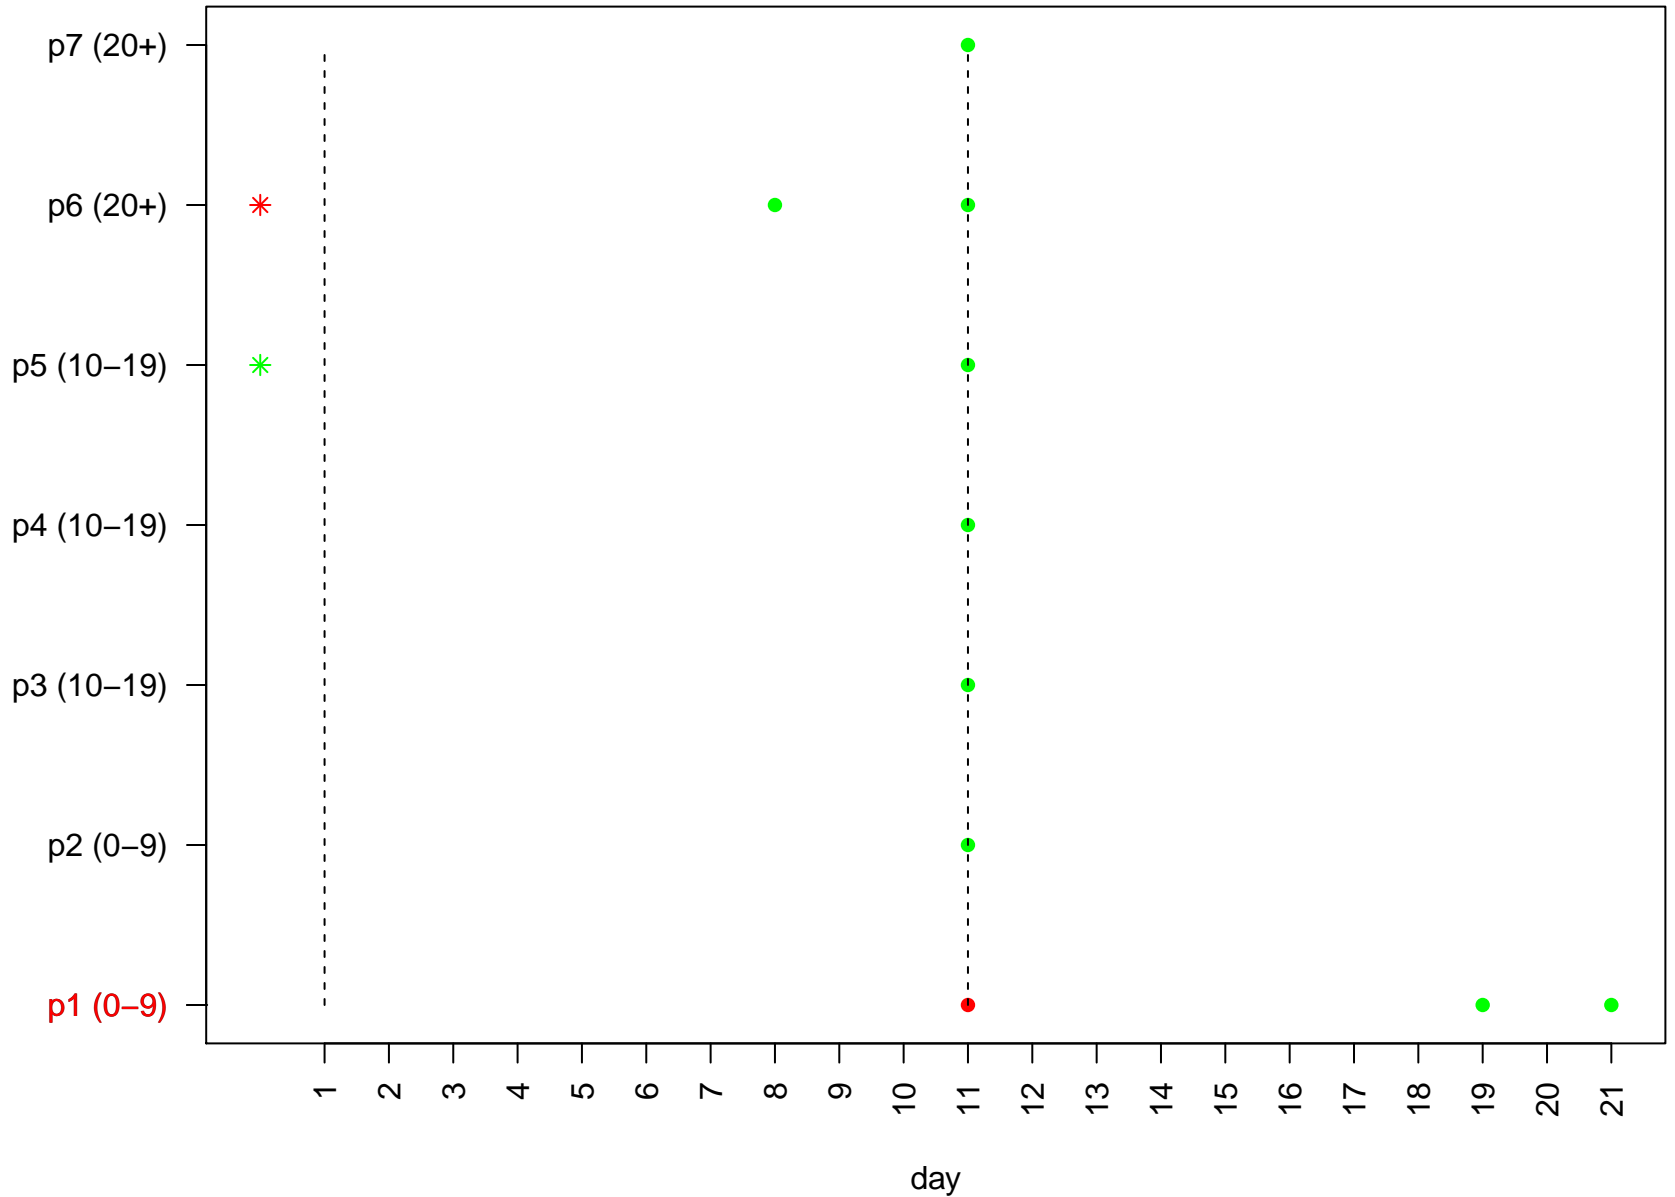

# Household 471

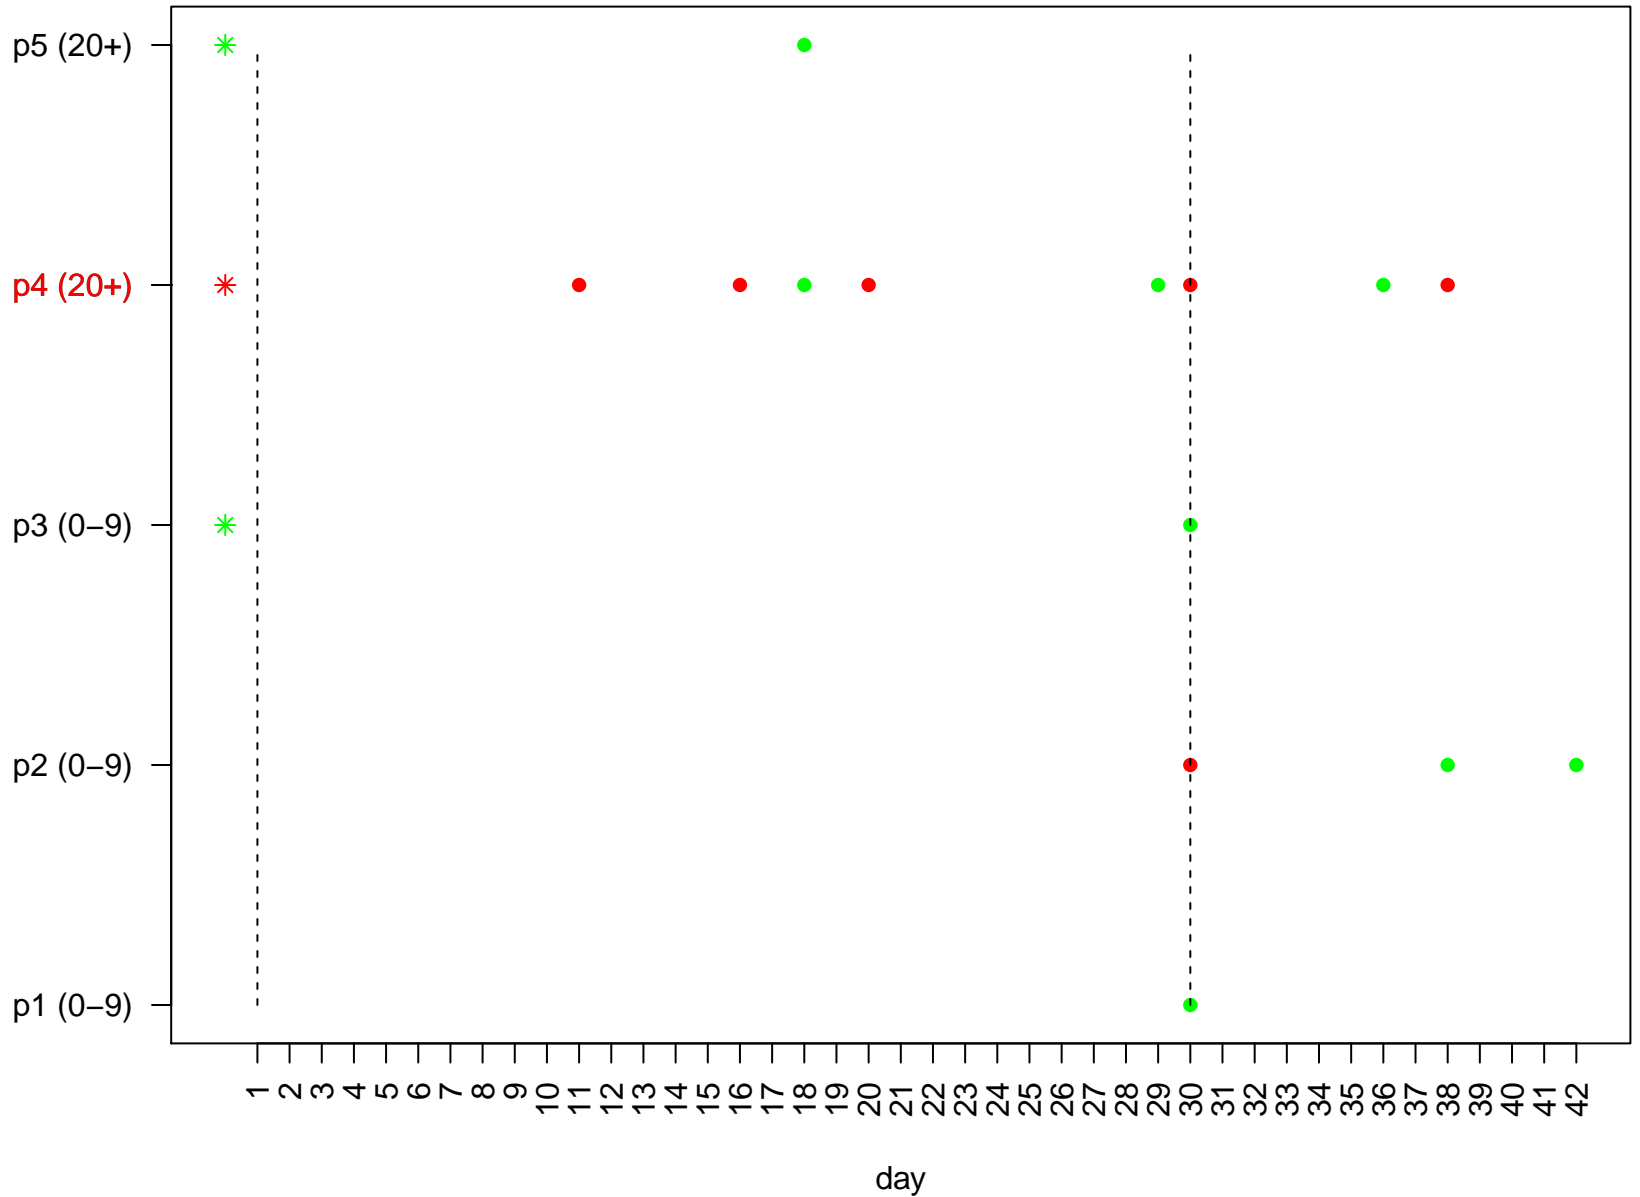

# Household 472

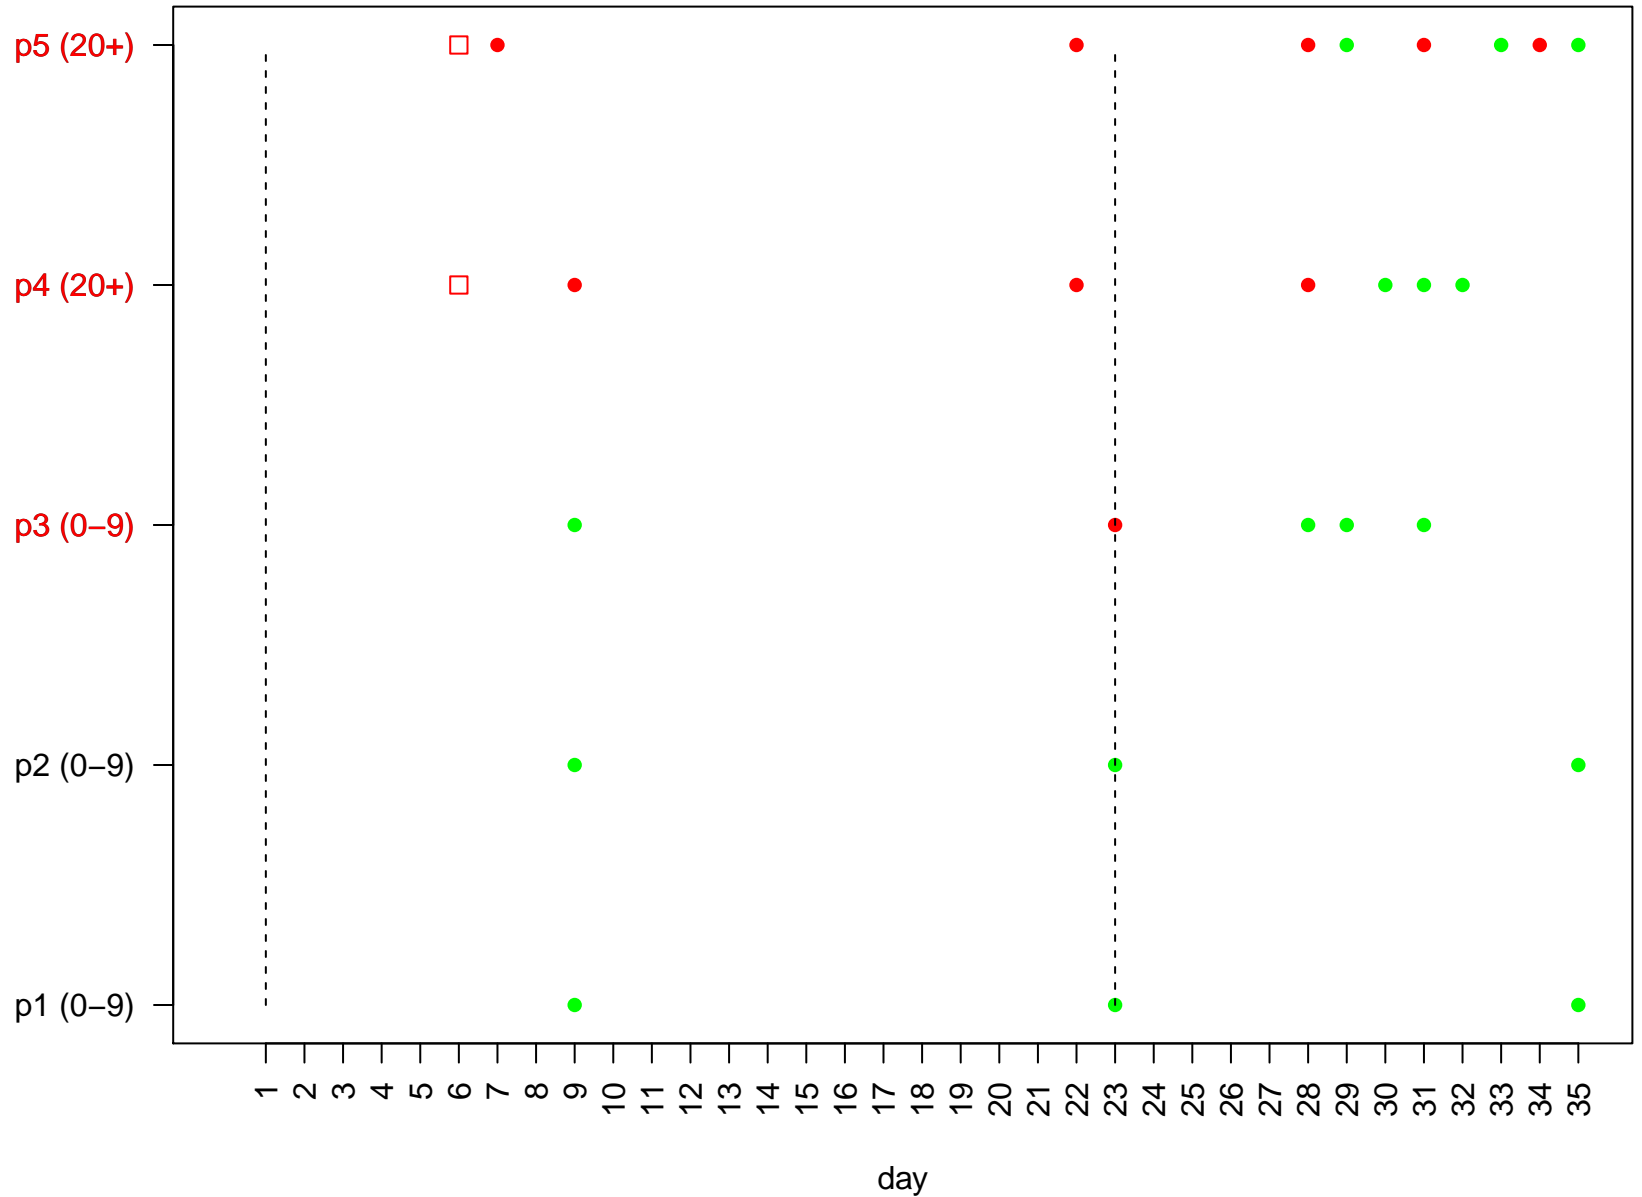

# Household 473

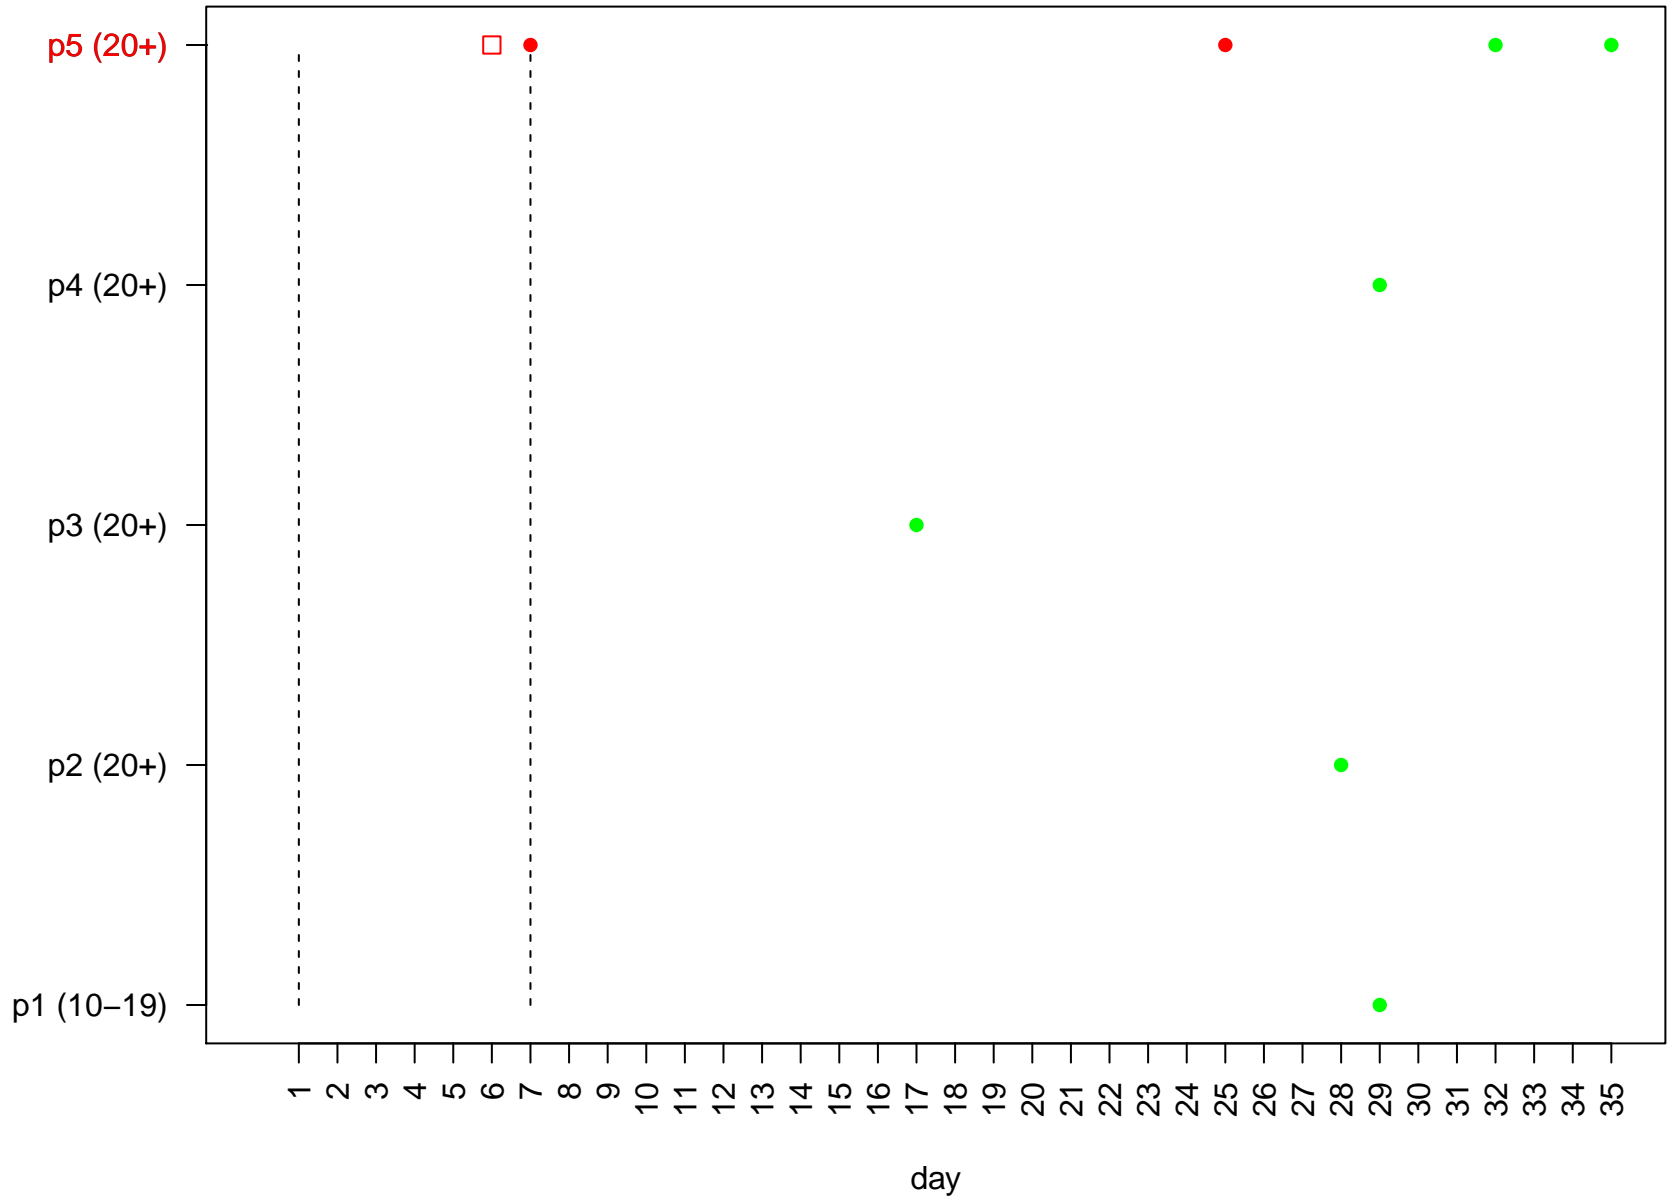

# Household 474

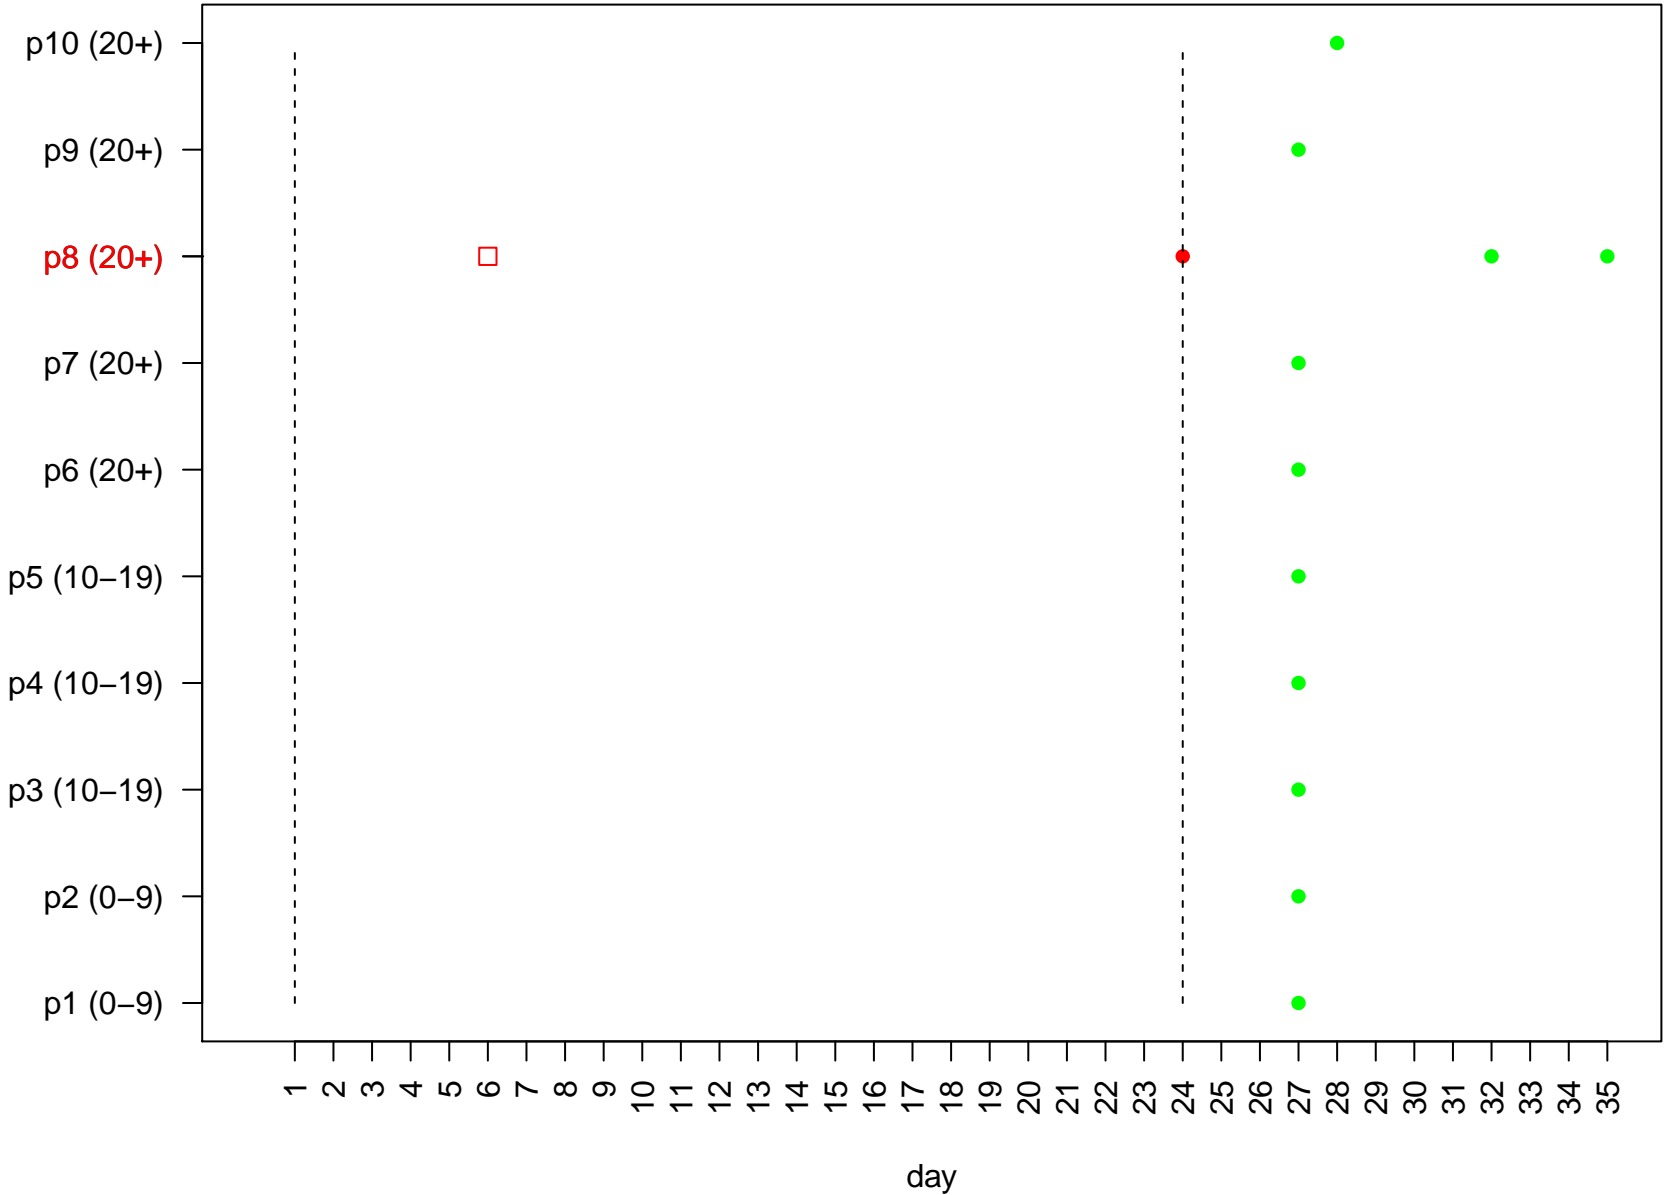

# Household 475

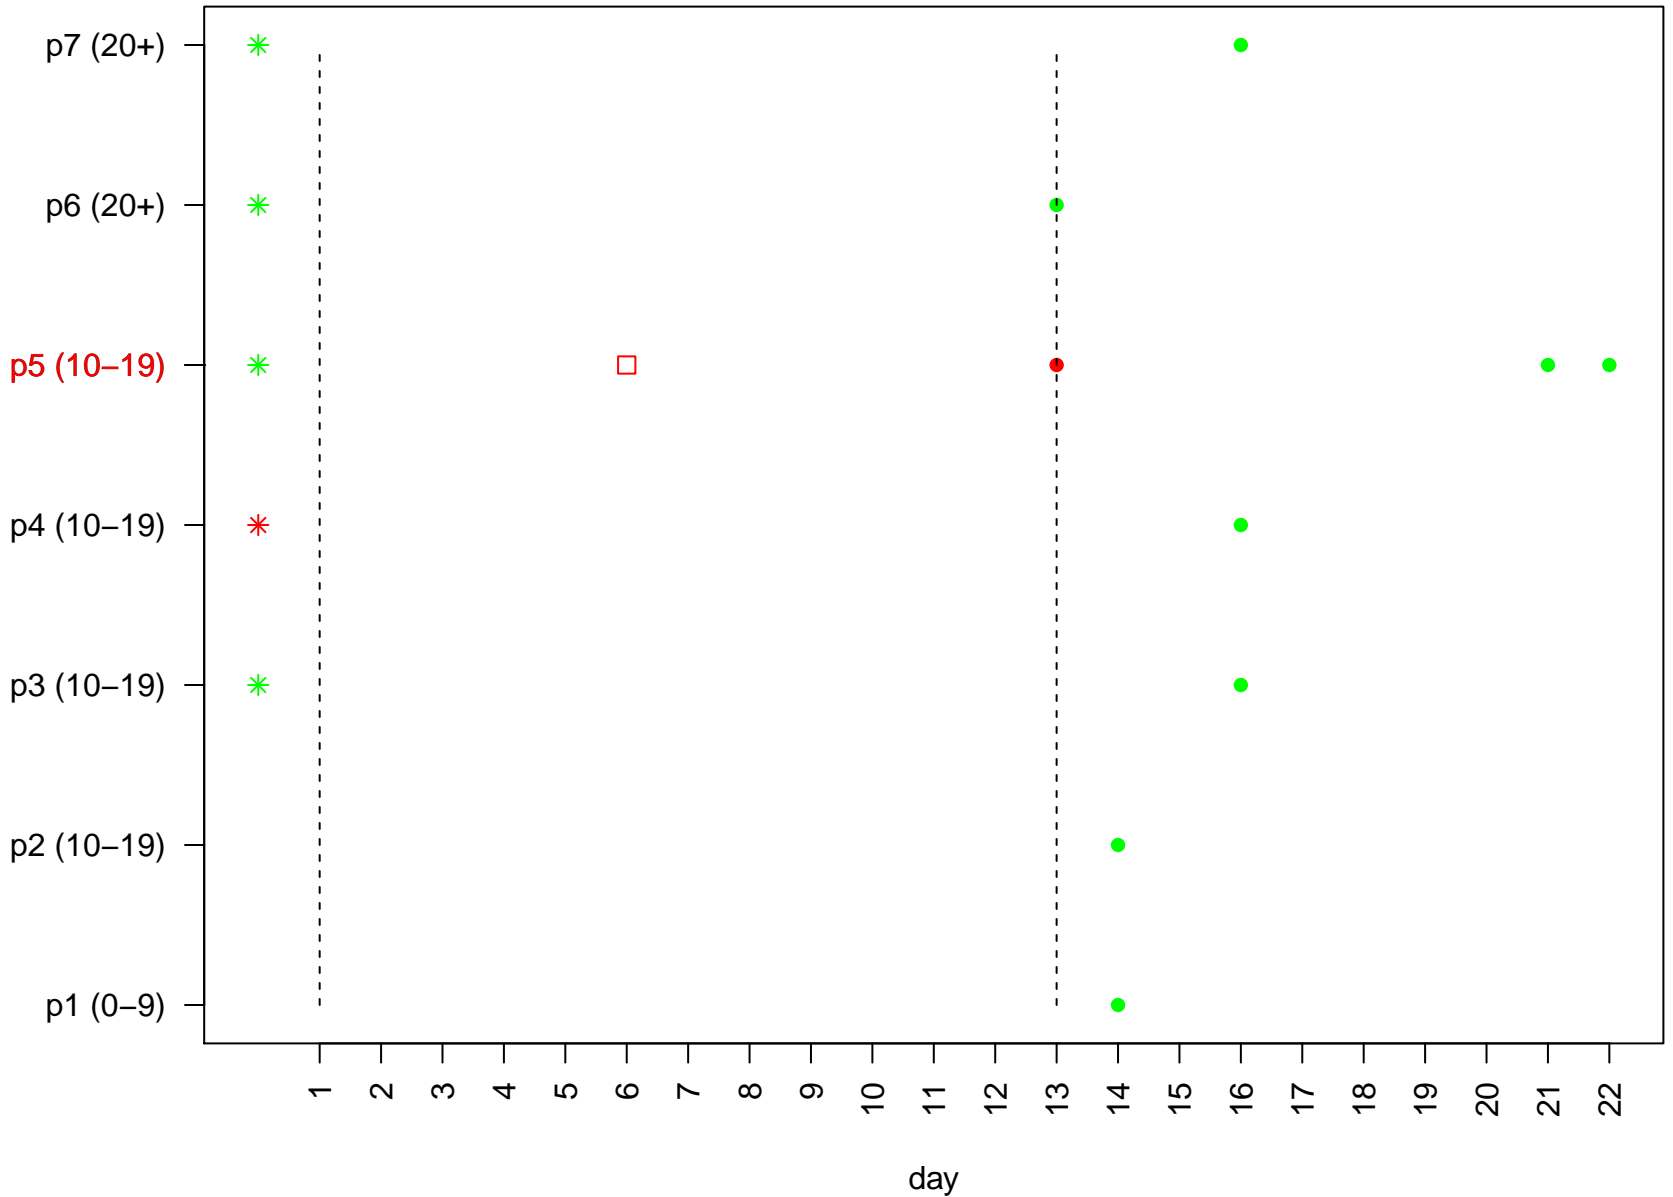



# Household 476

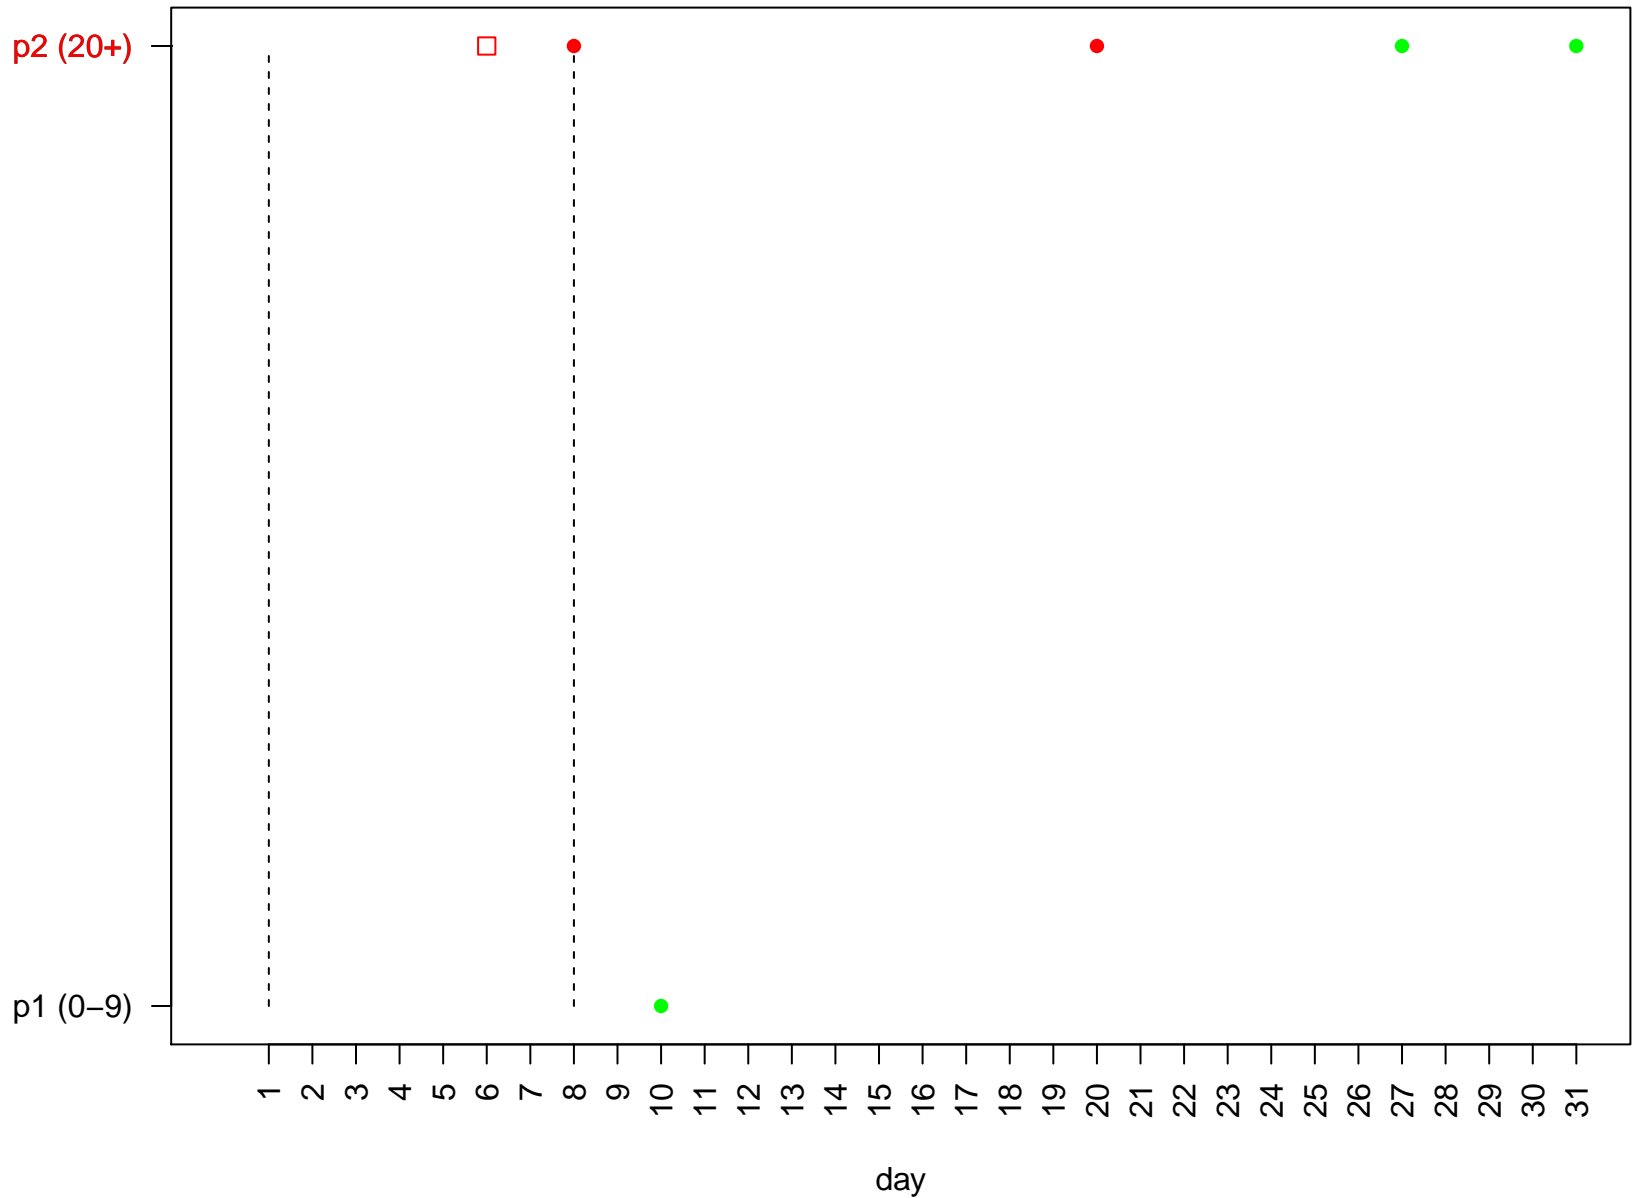

# Household 477

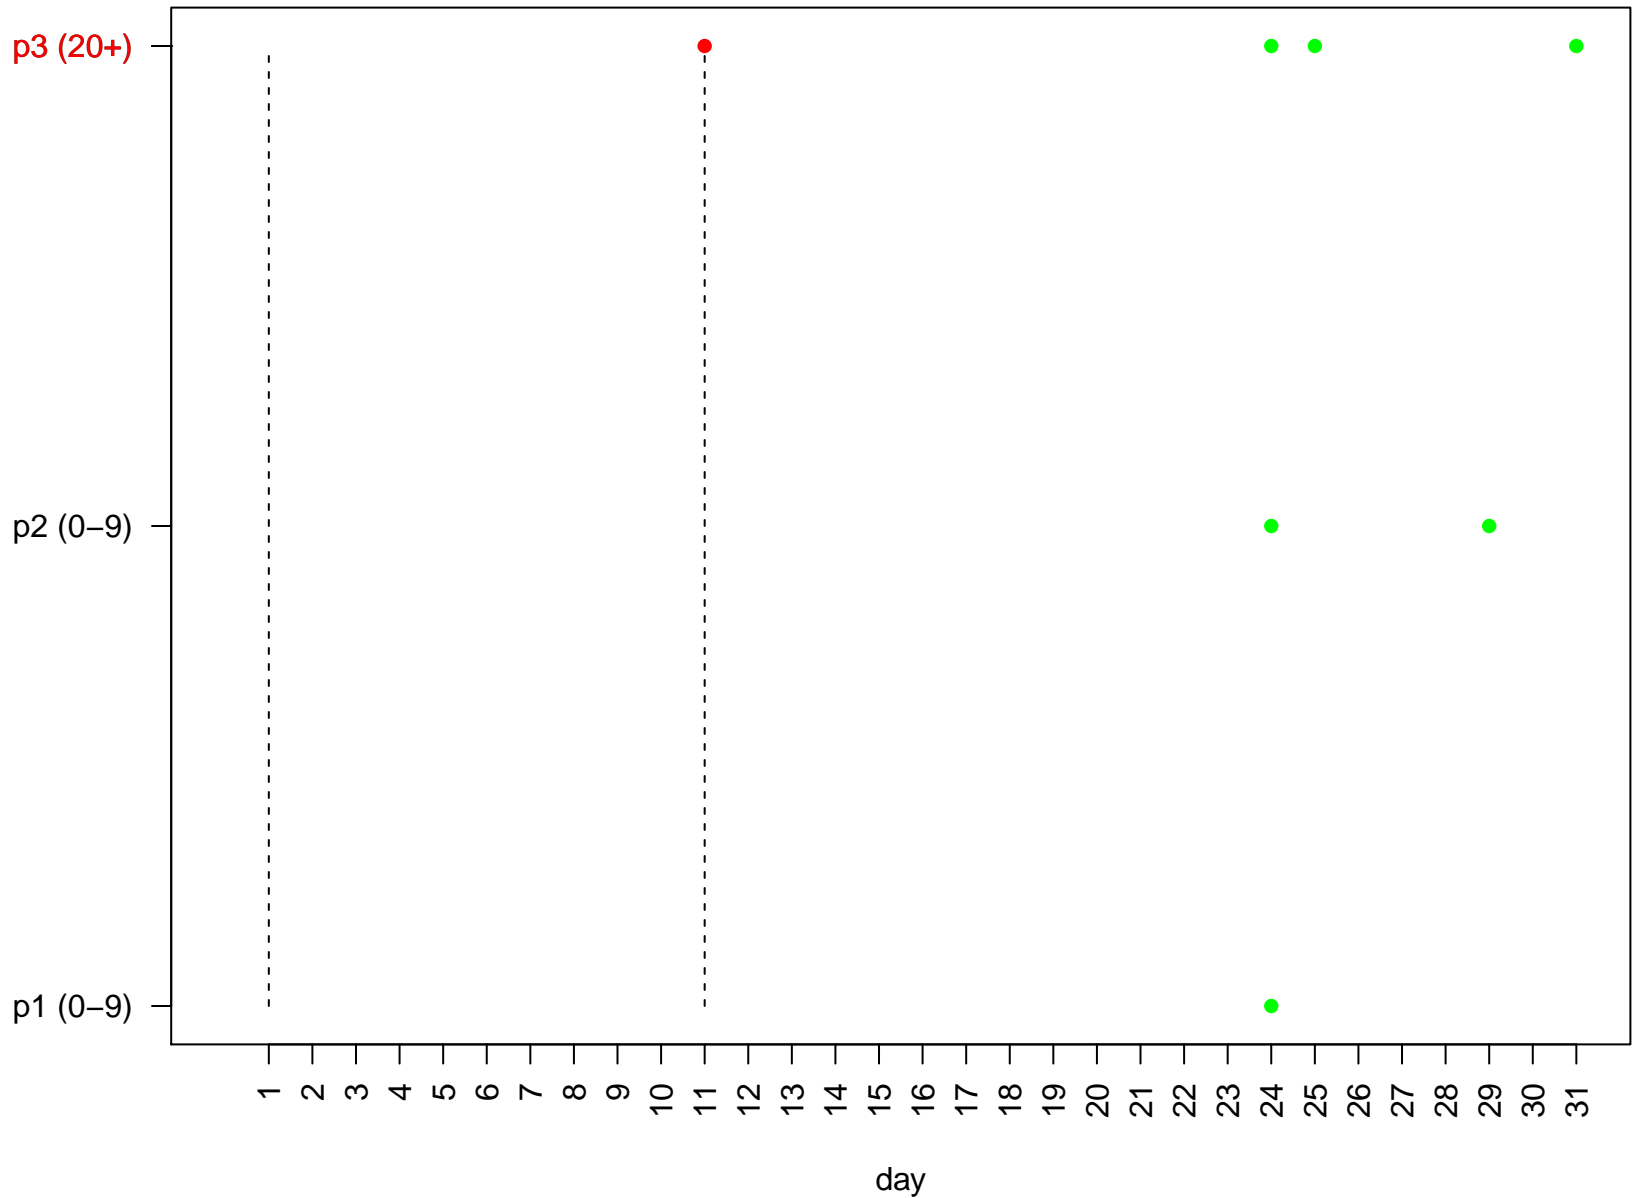

# Household 478

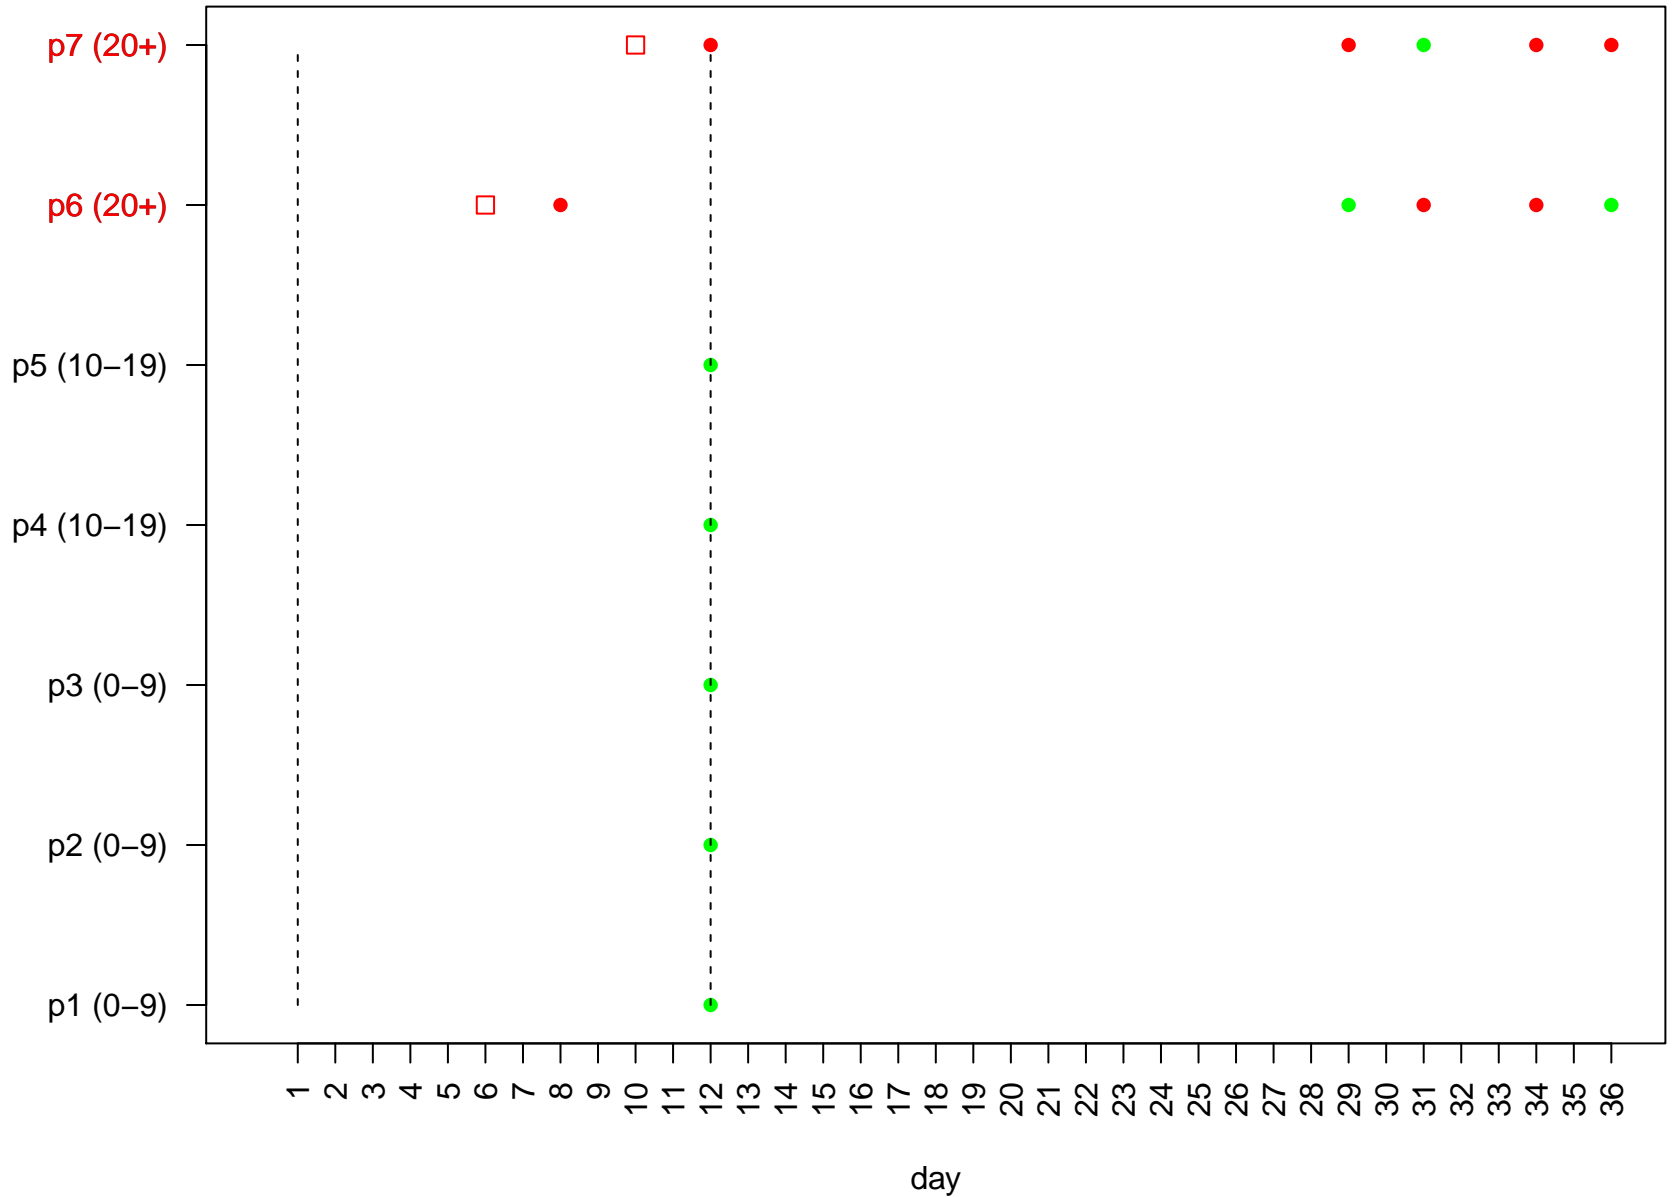

# Household 481

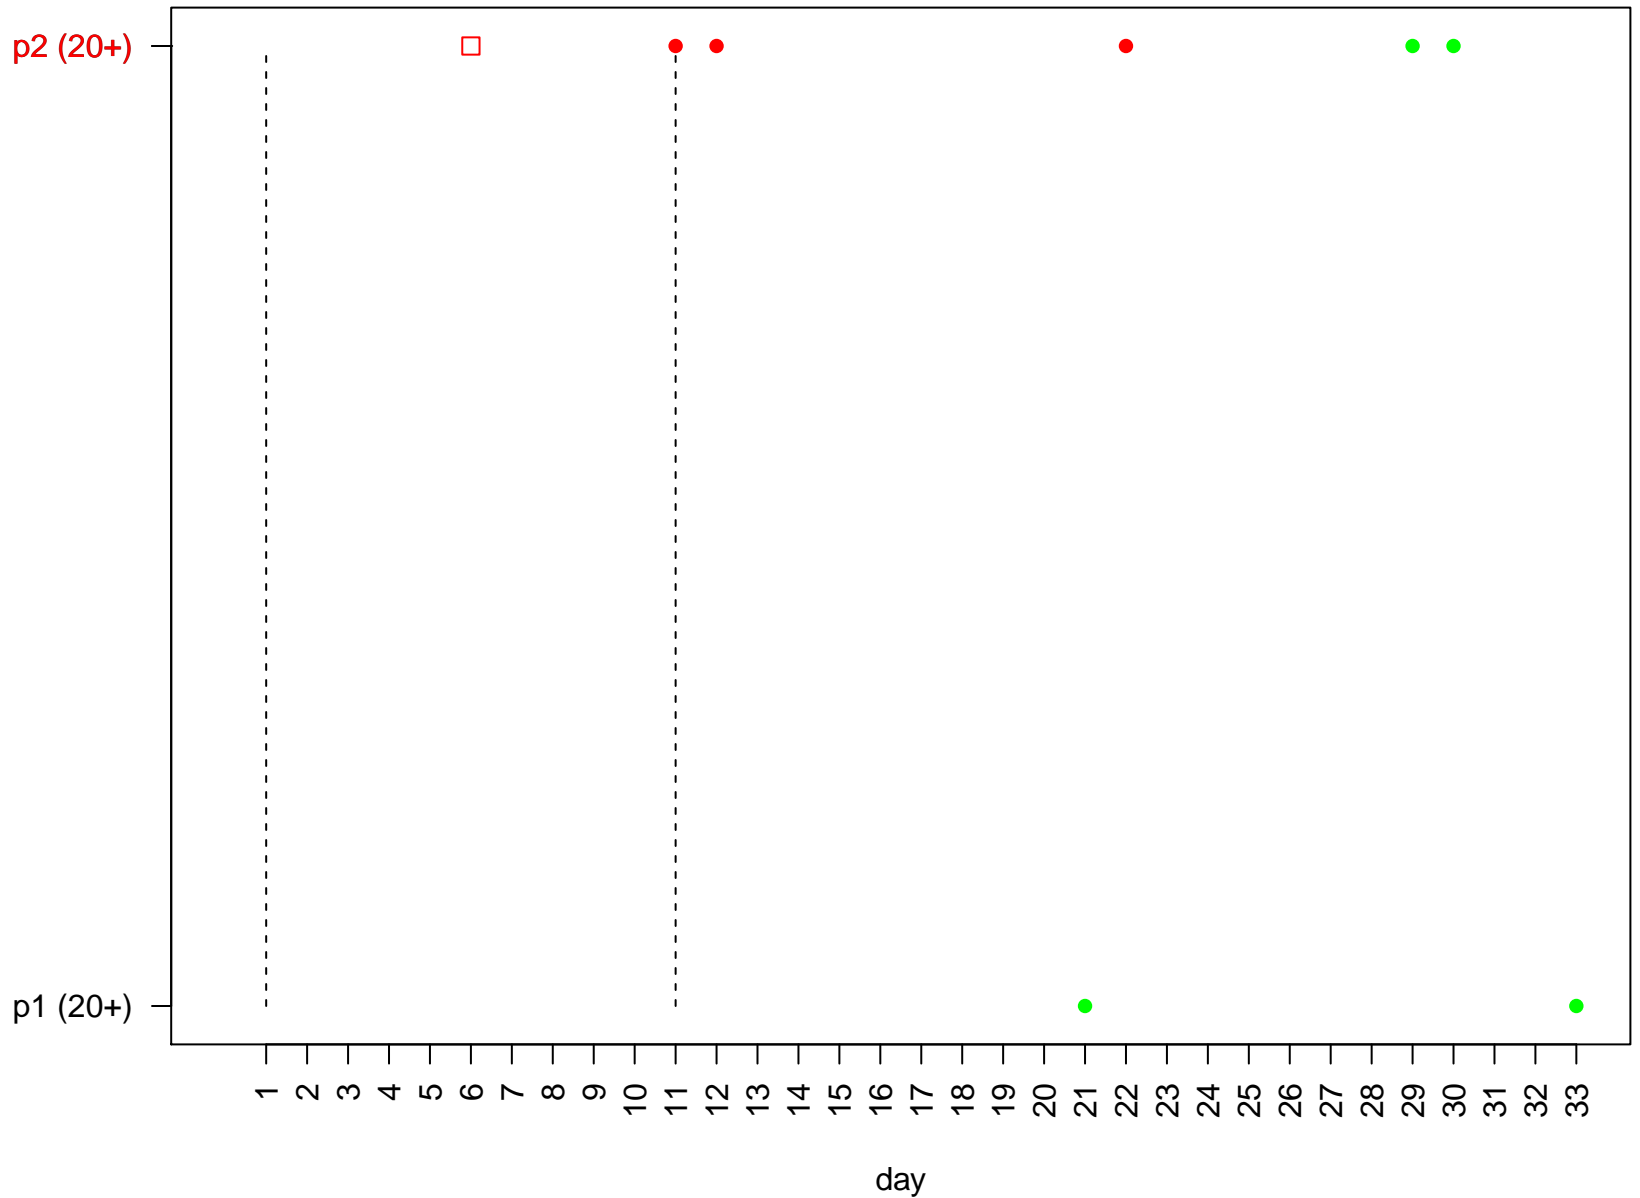

# Household 482

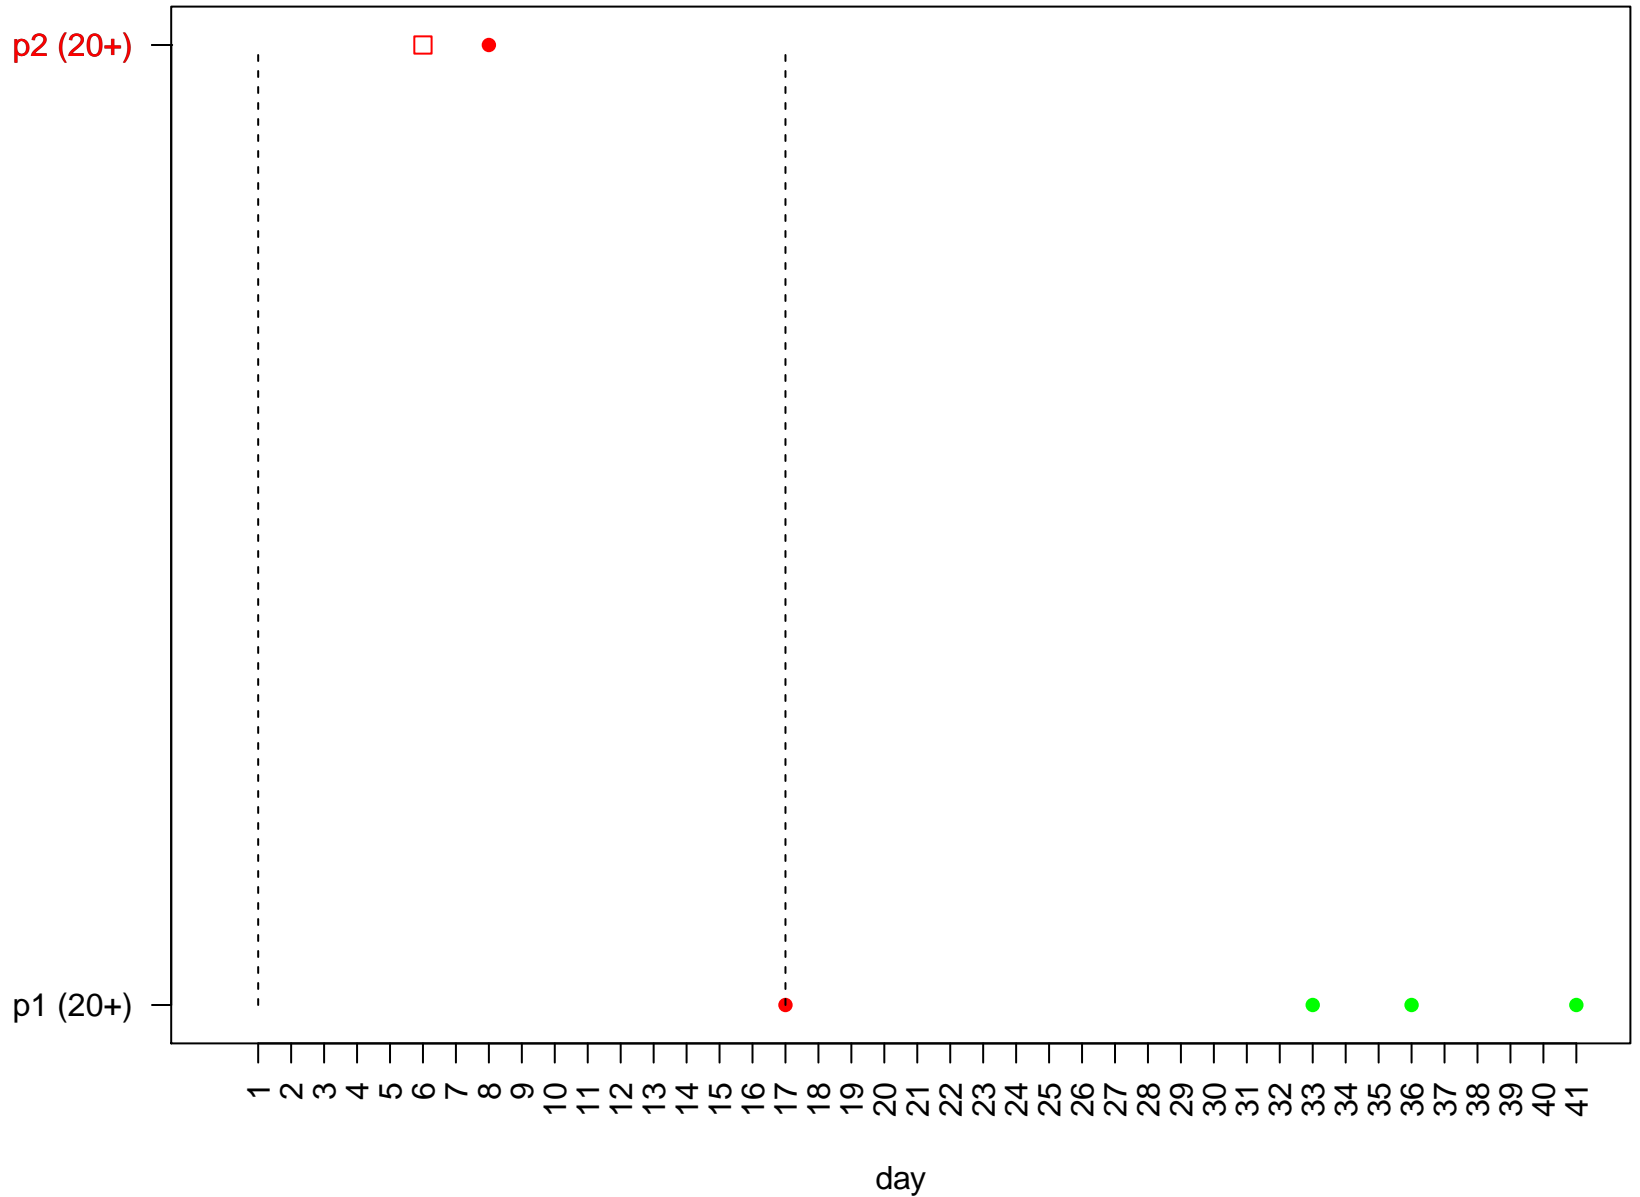

# Household 483

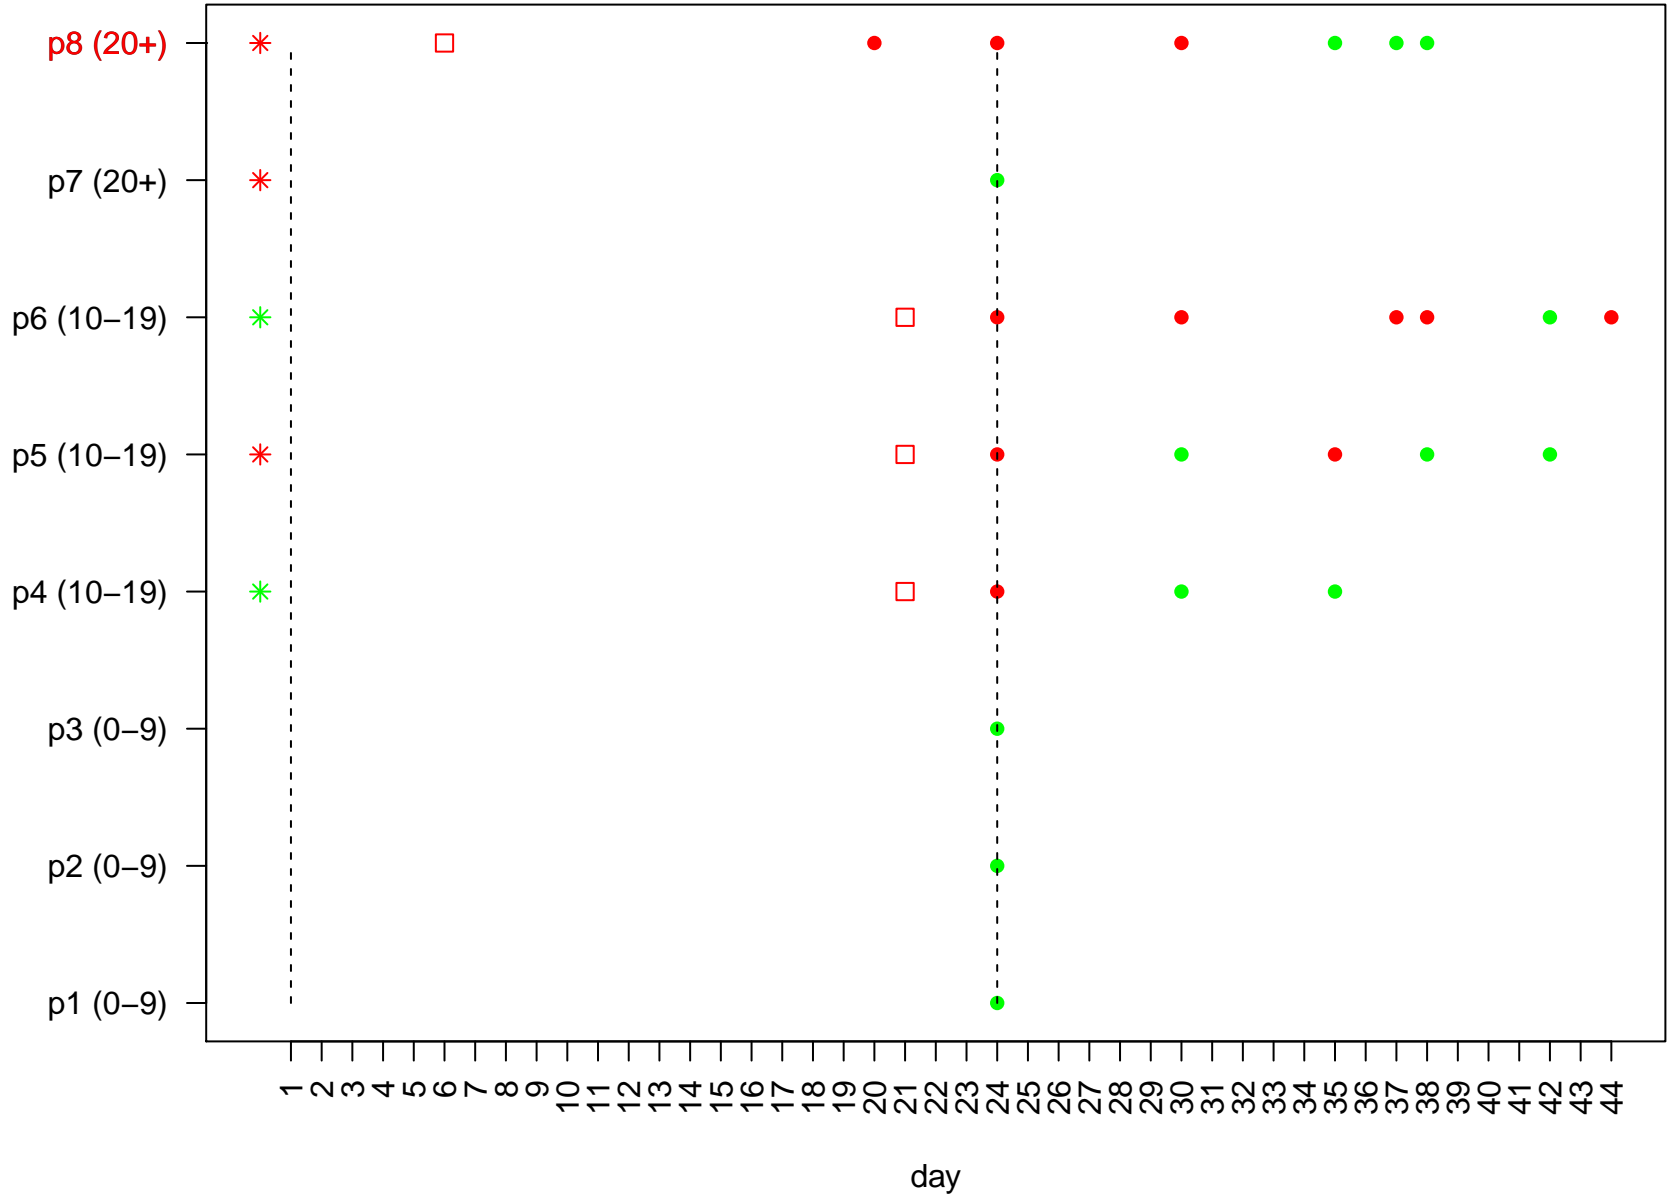

# Household 484

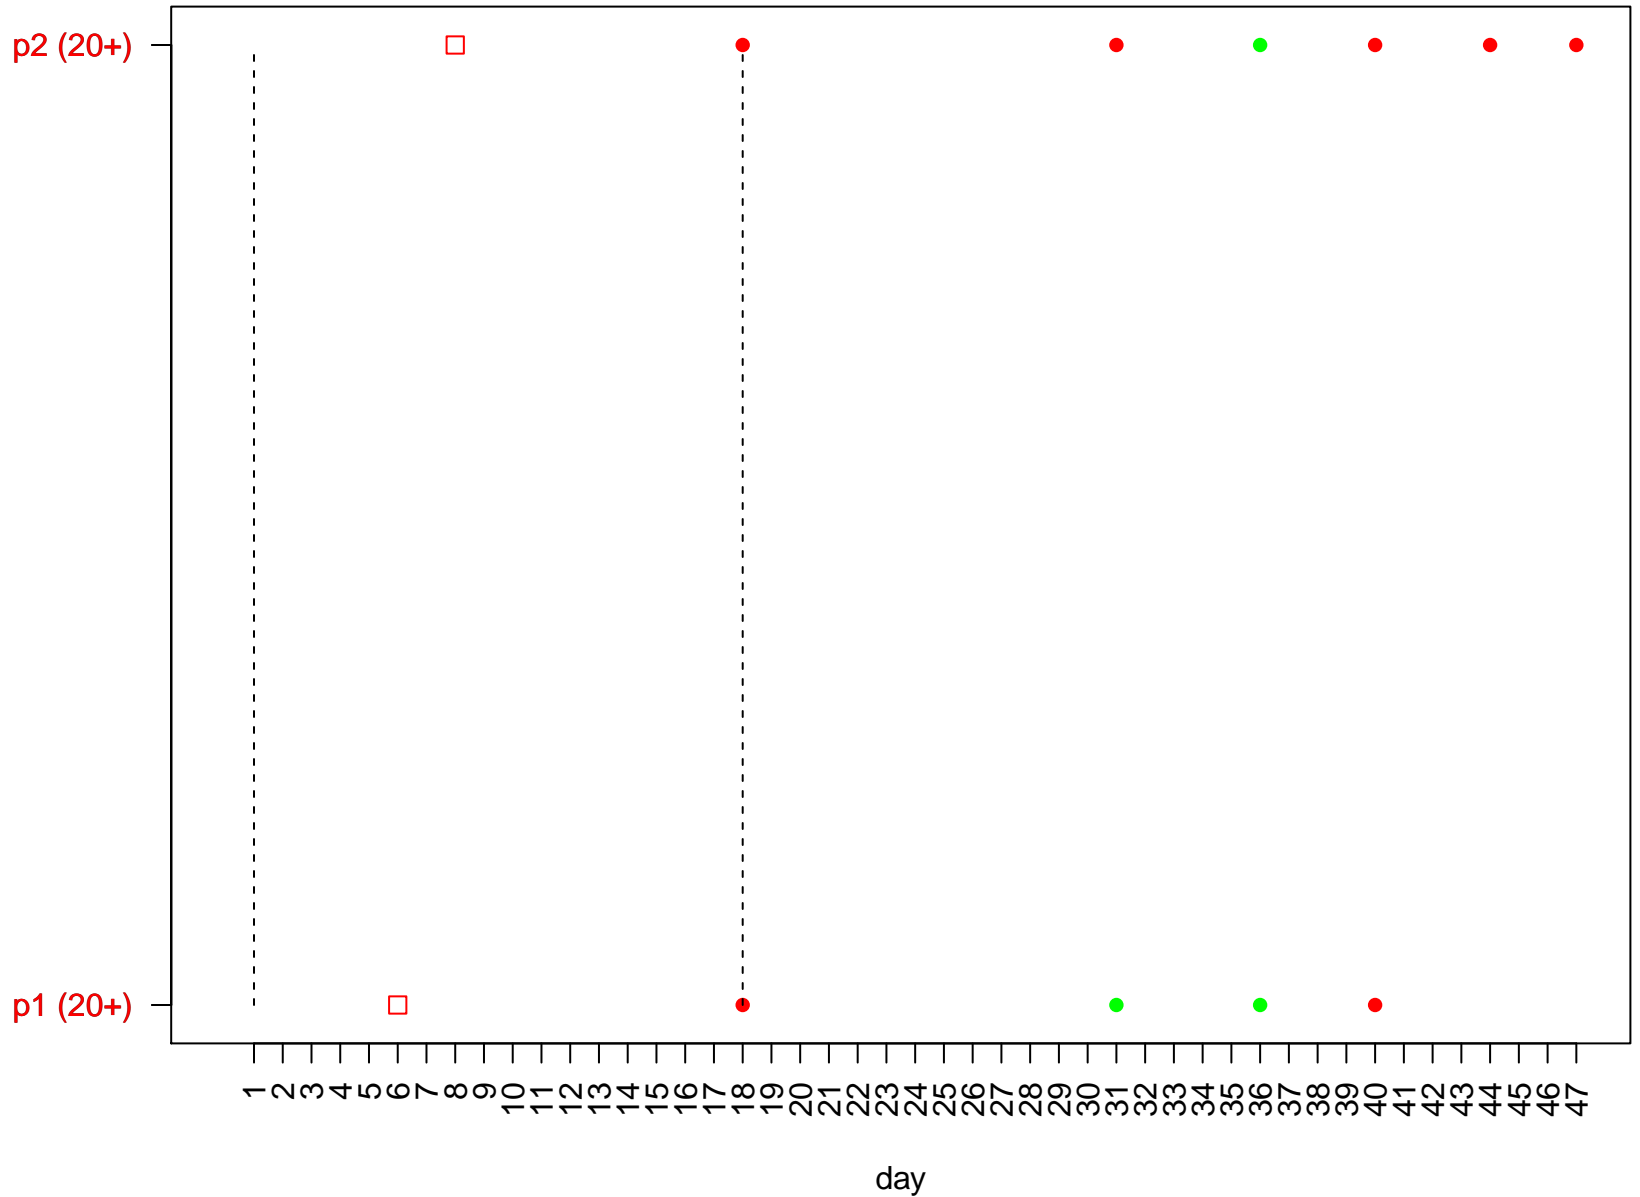

# Household 485

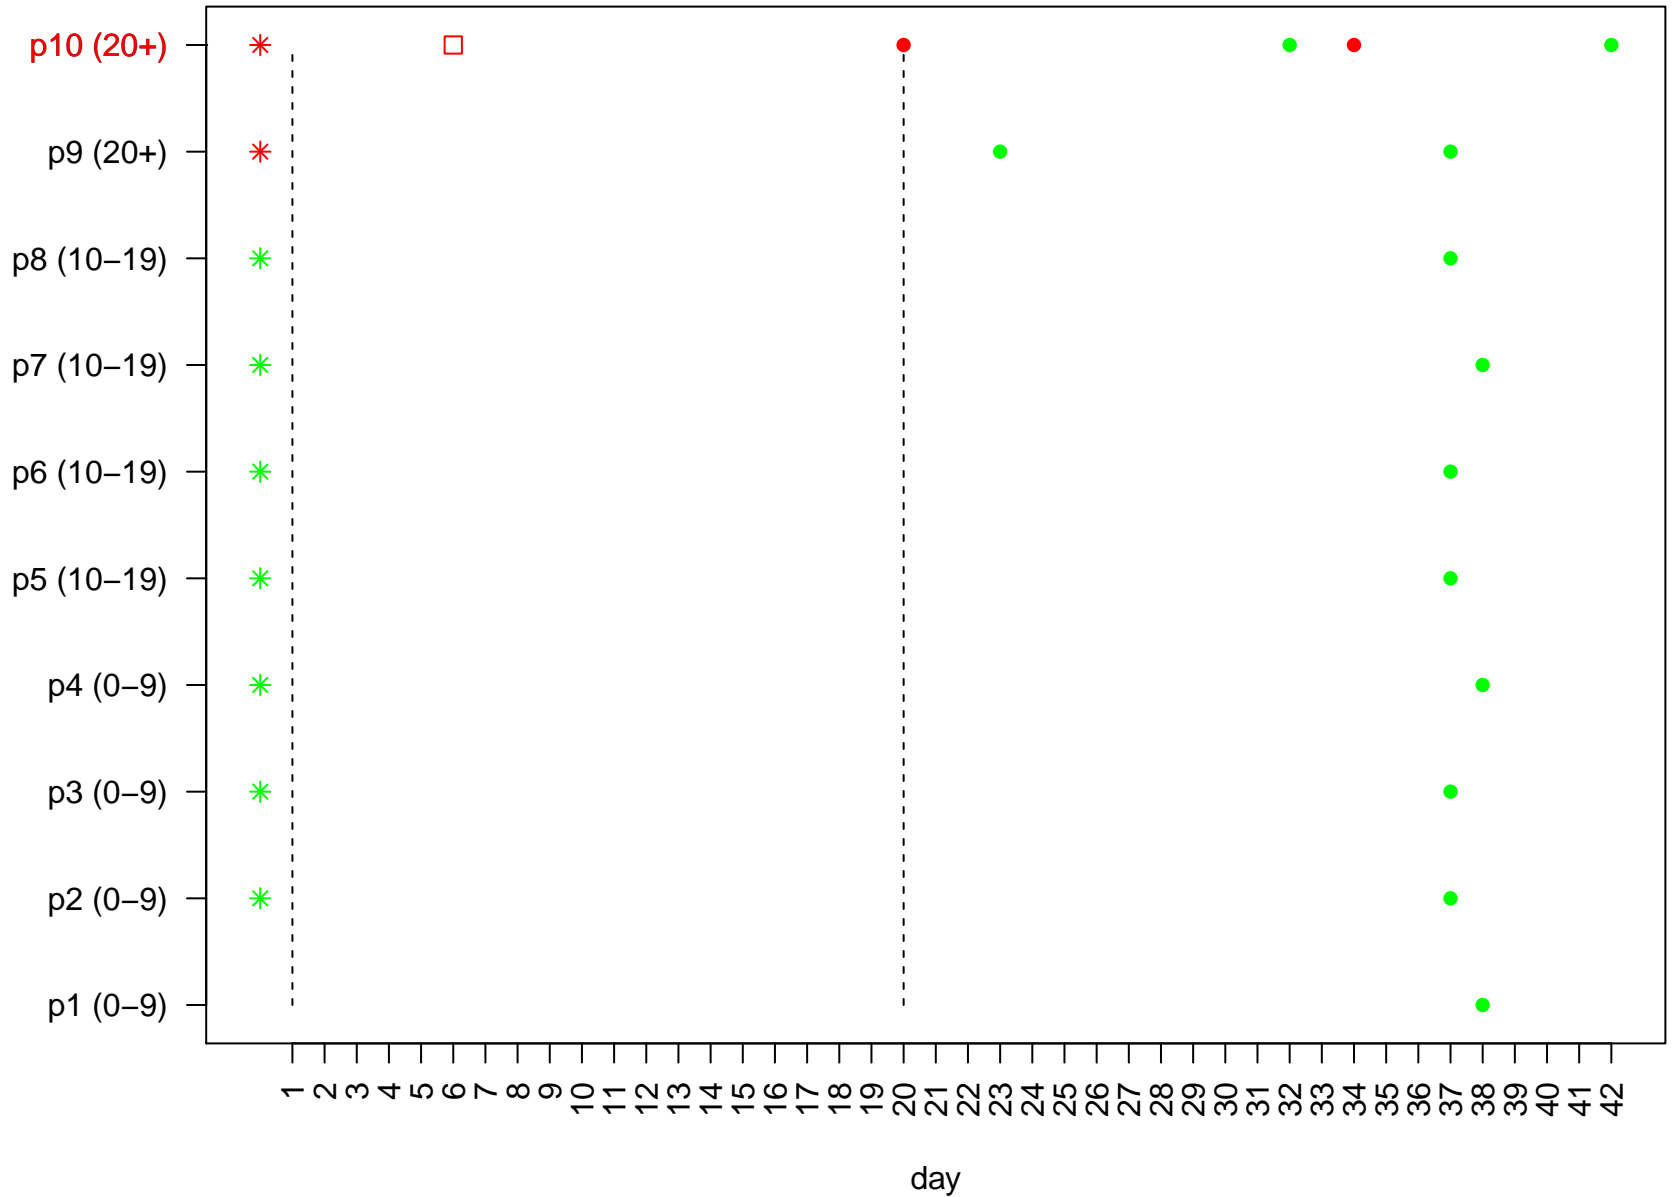



# Household 486

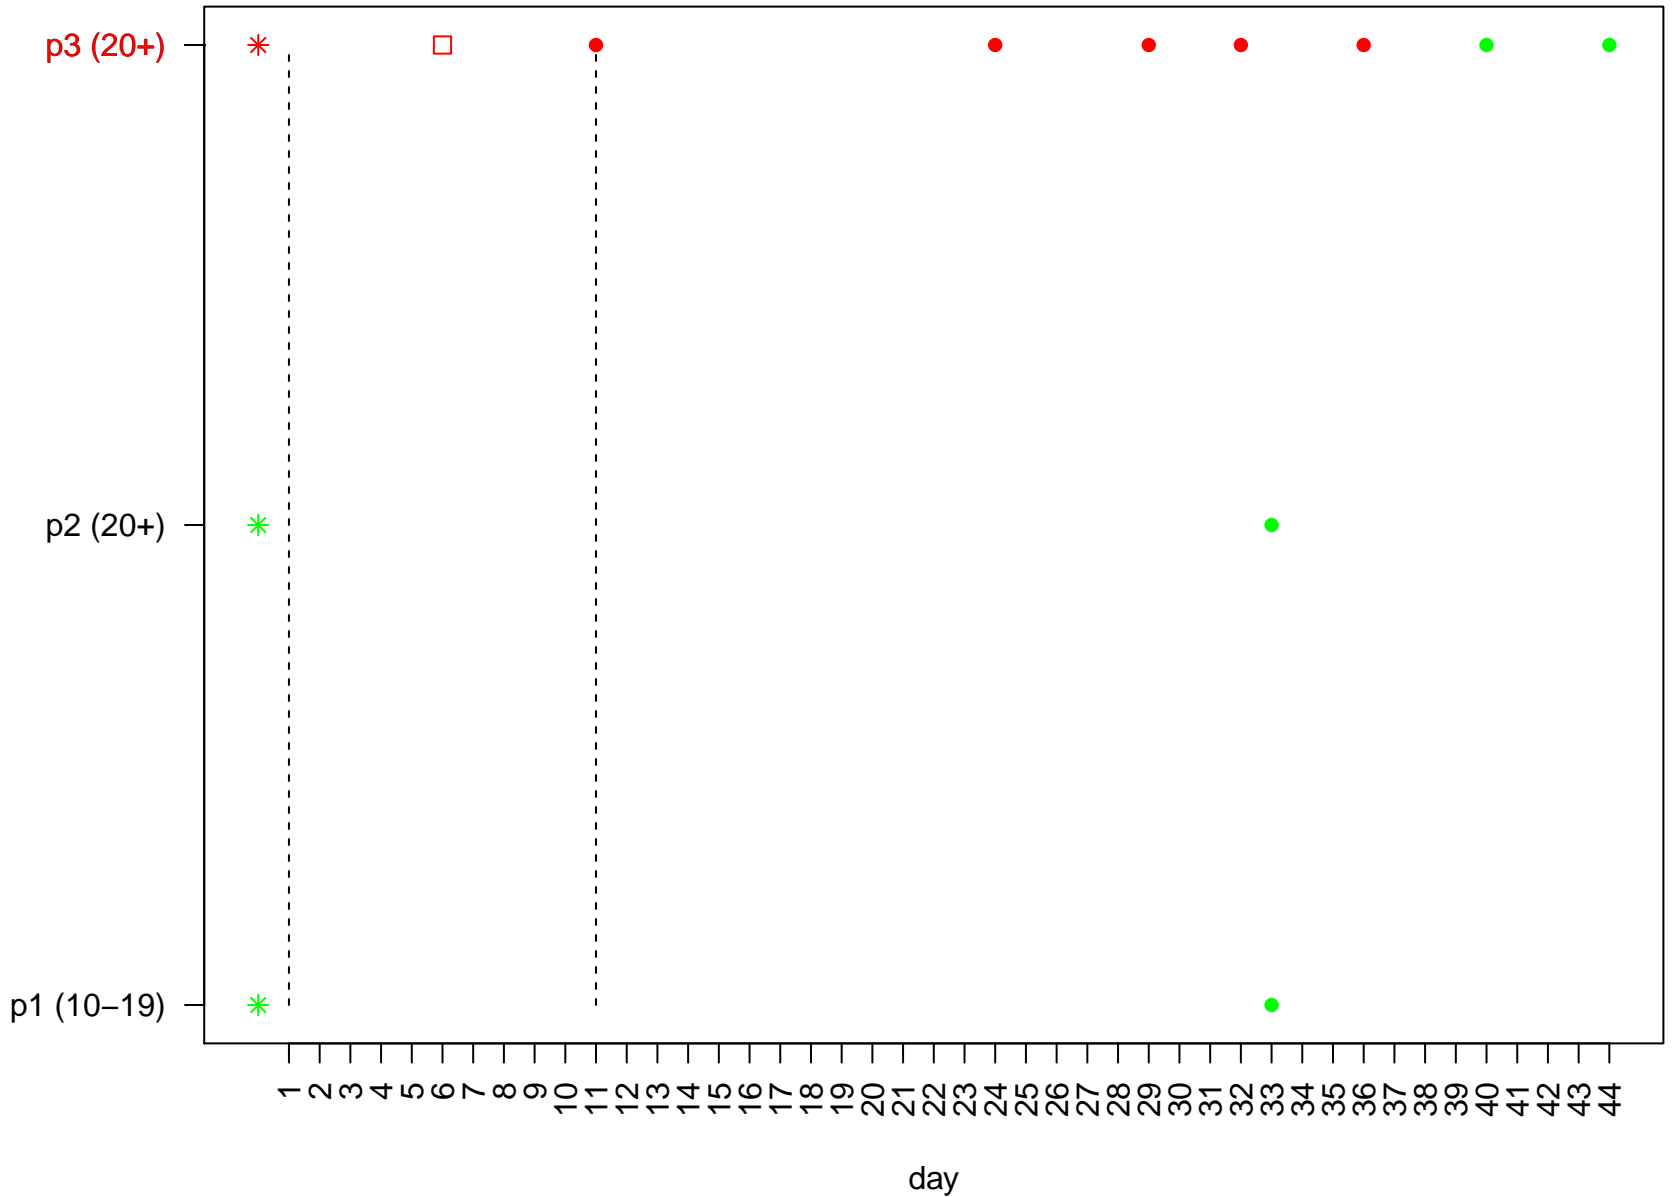

# Household 487

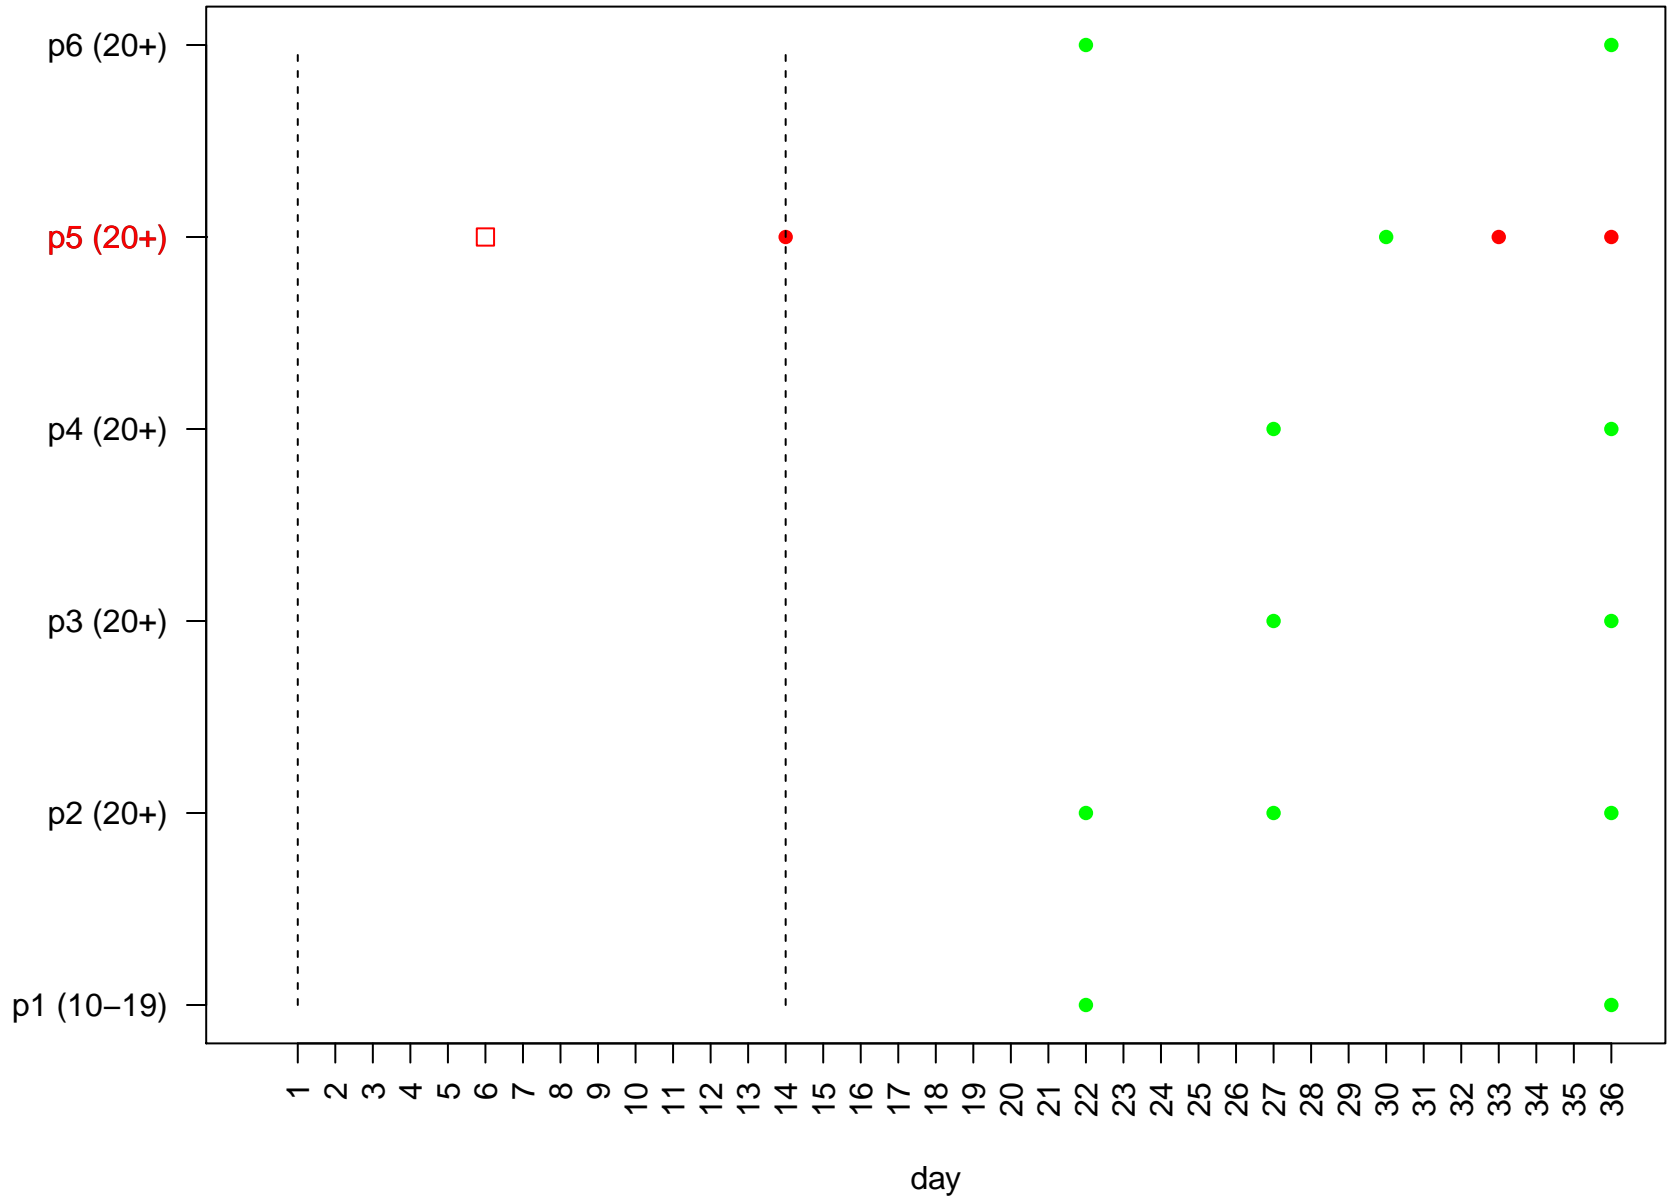

# Household 488

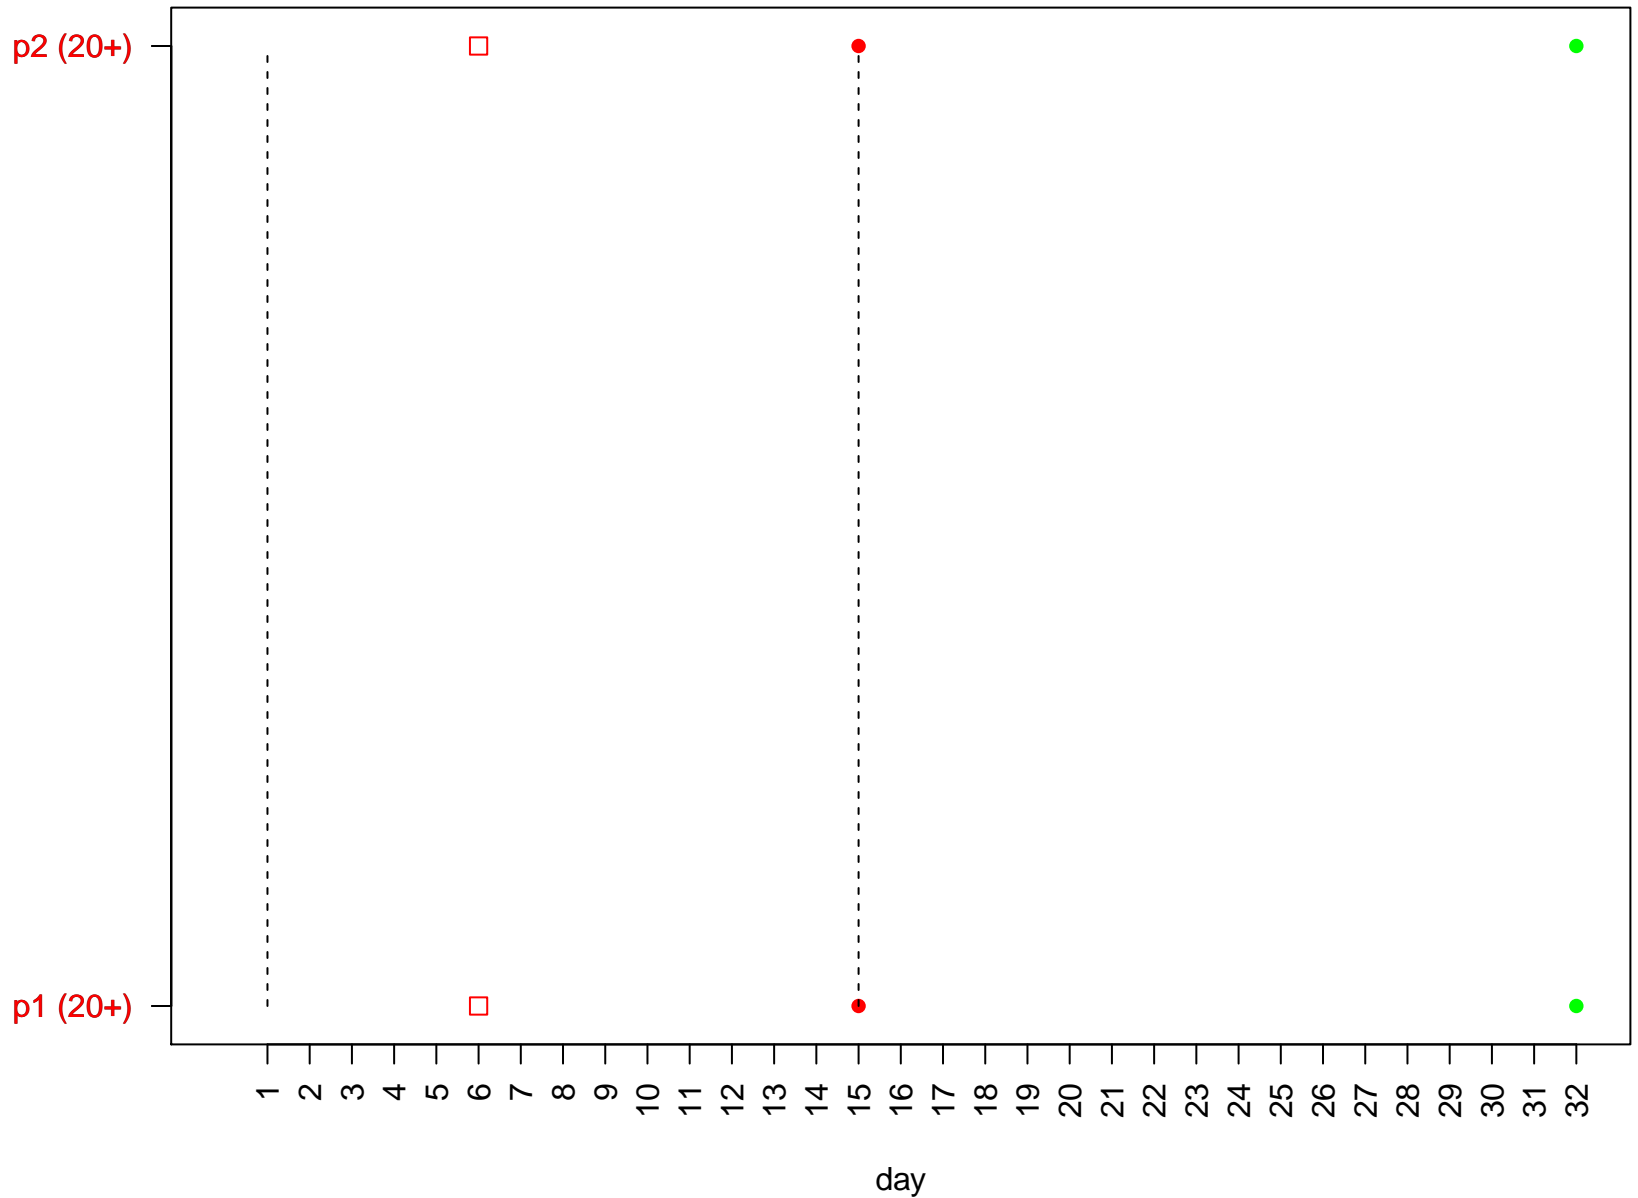

# Household 489

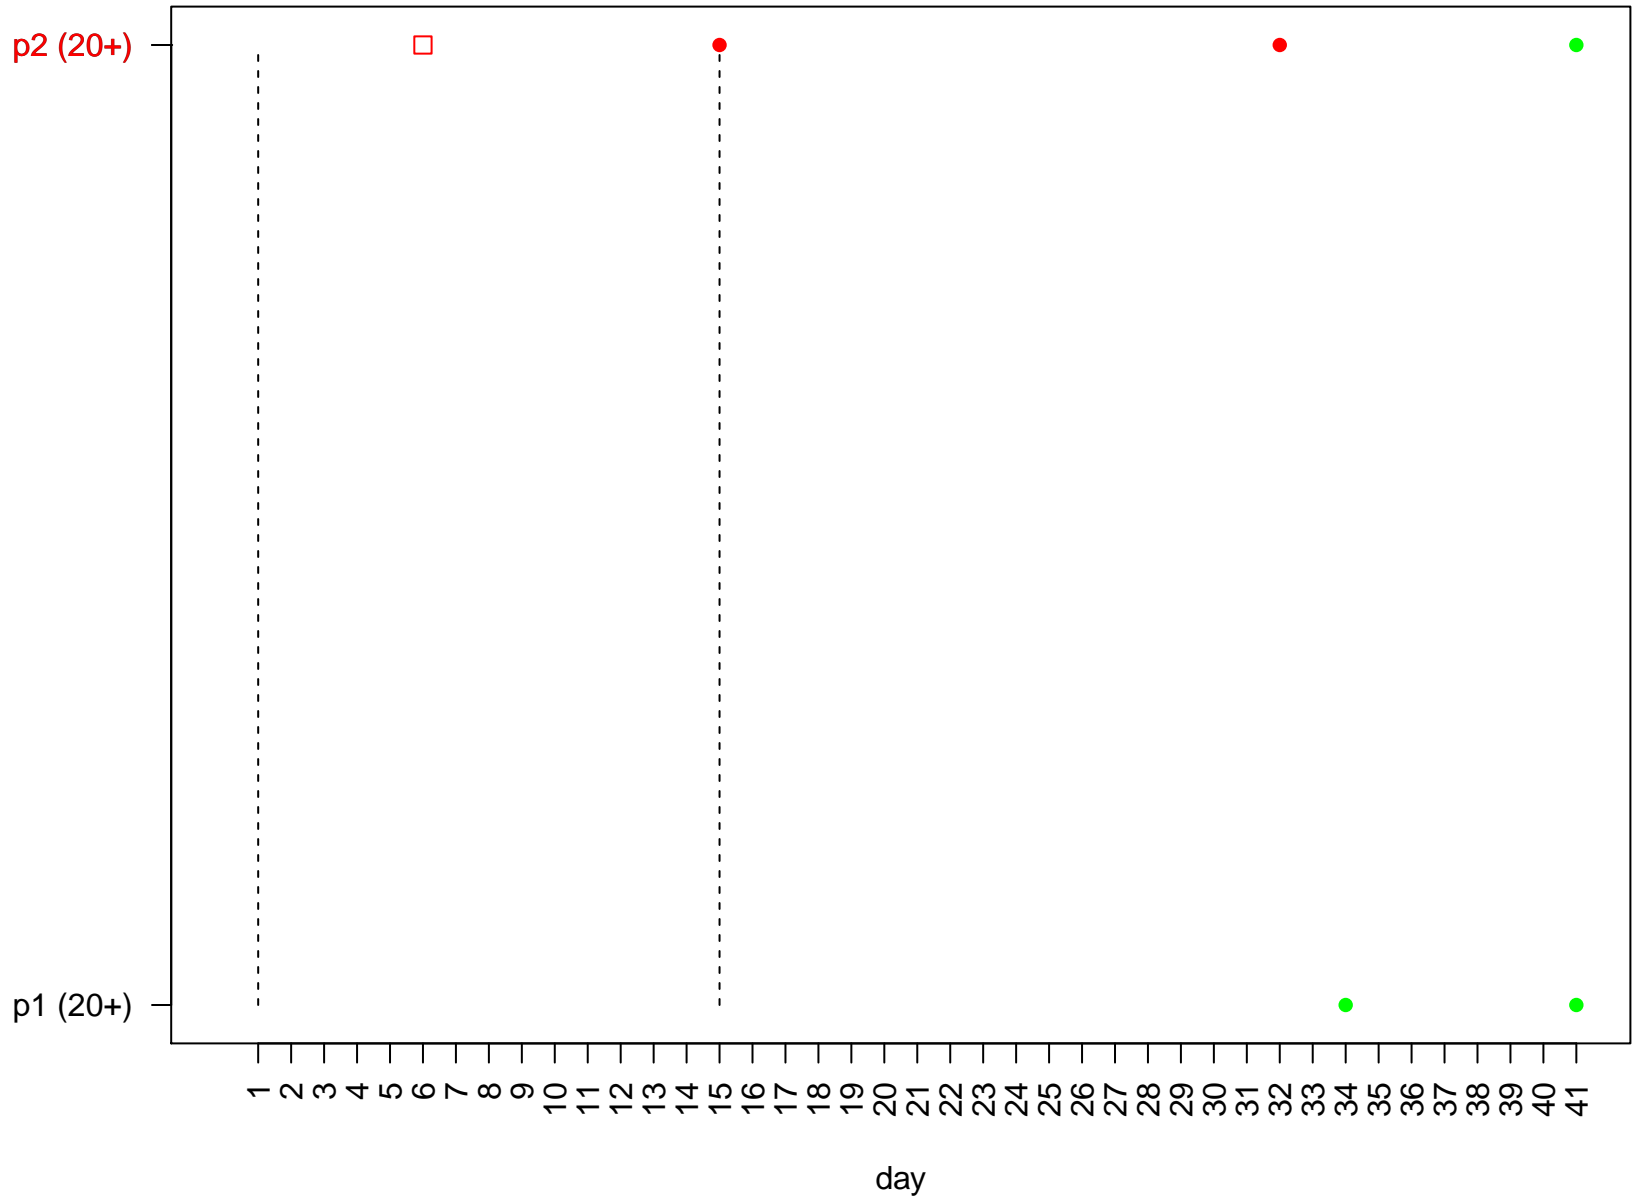

# Household 490

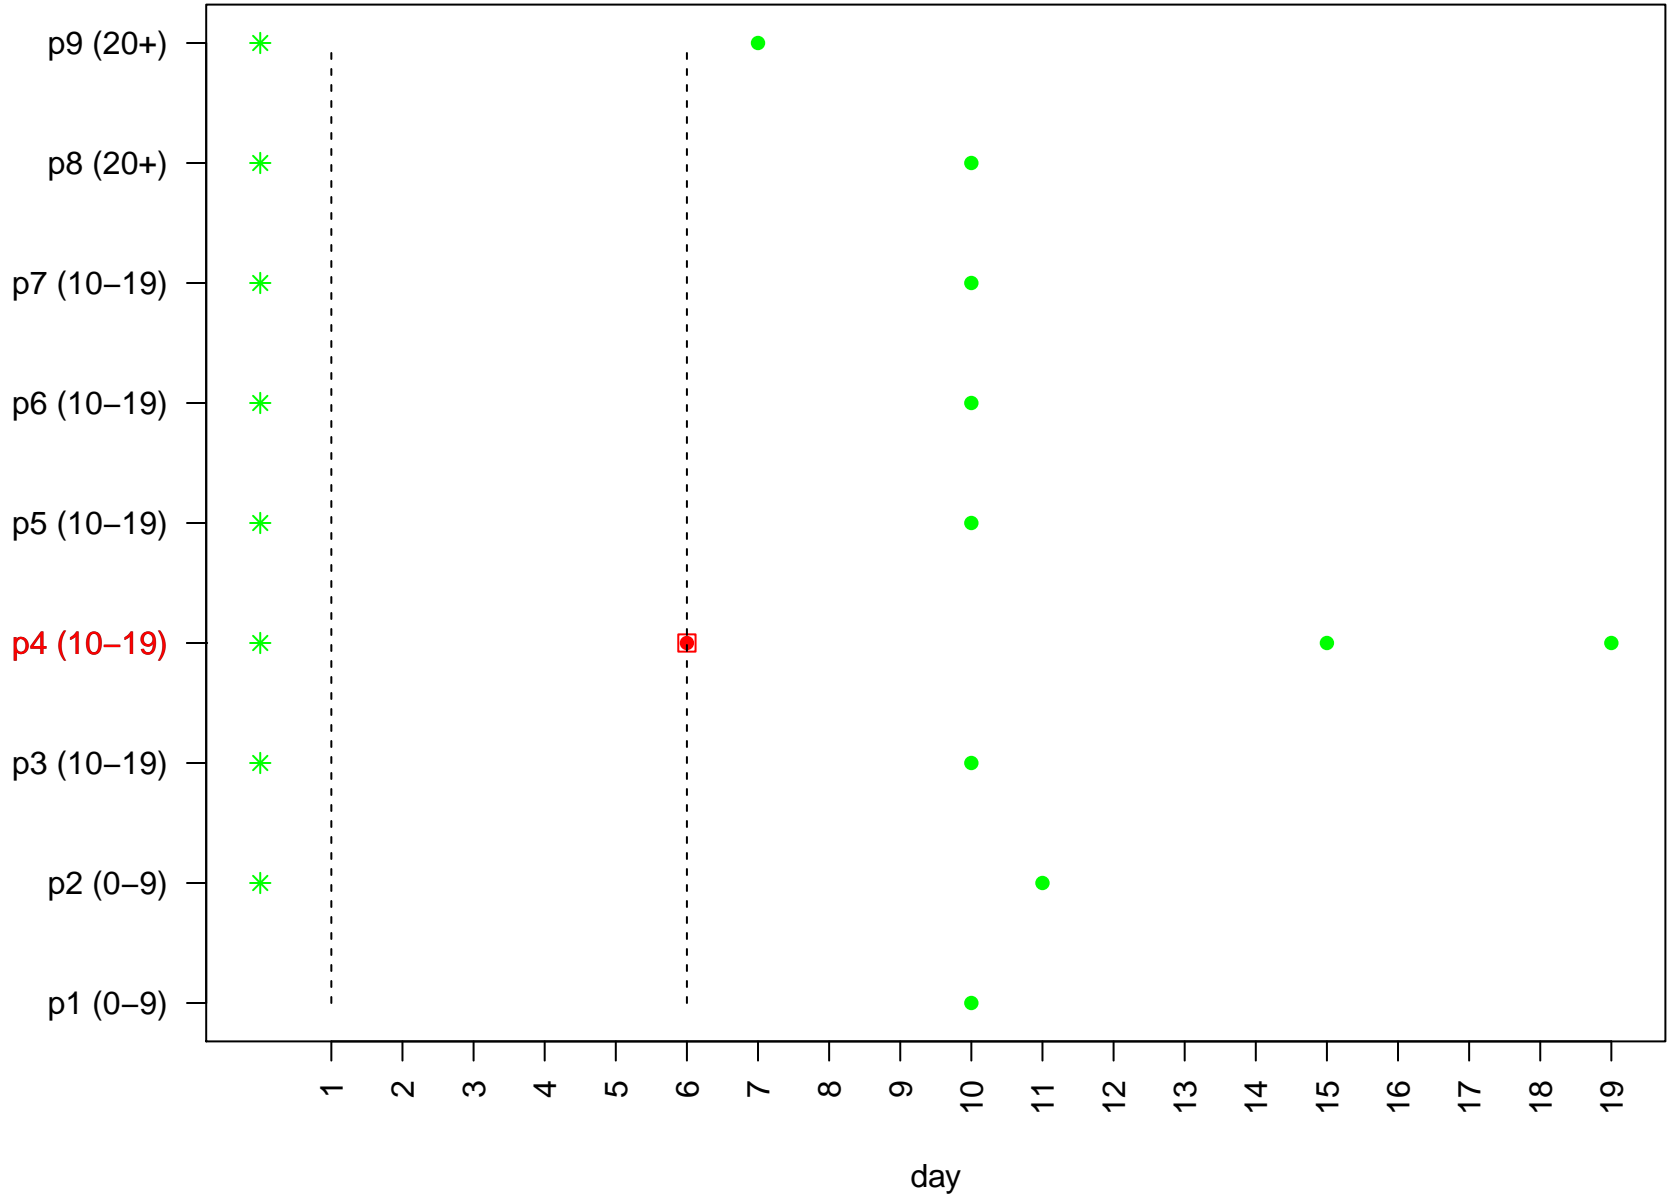

# Household 492

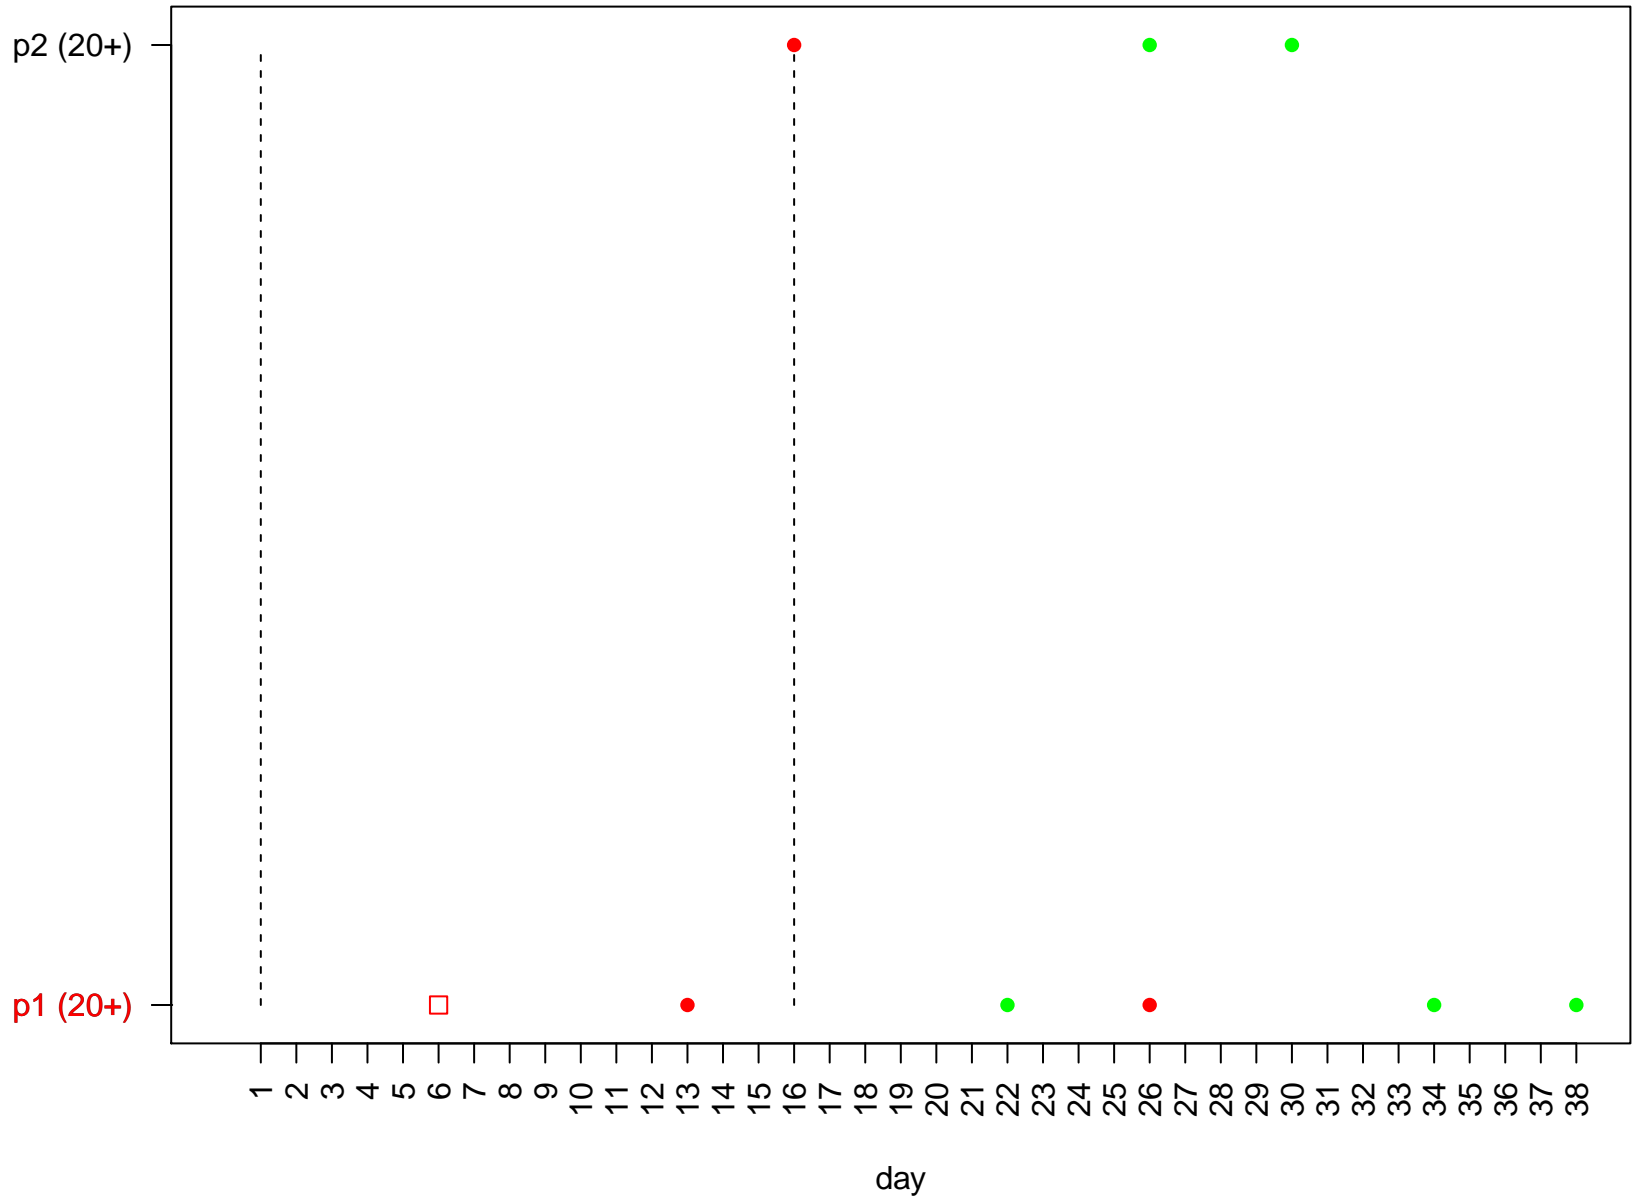



# Household 494

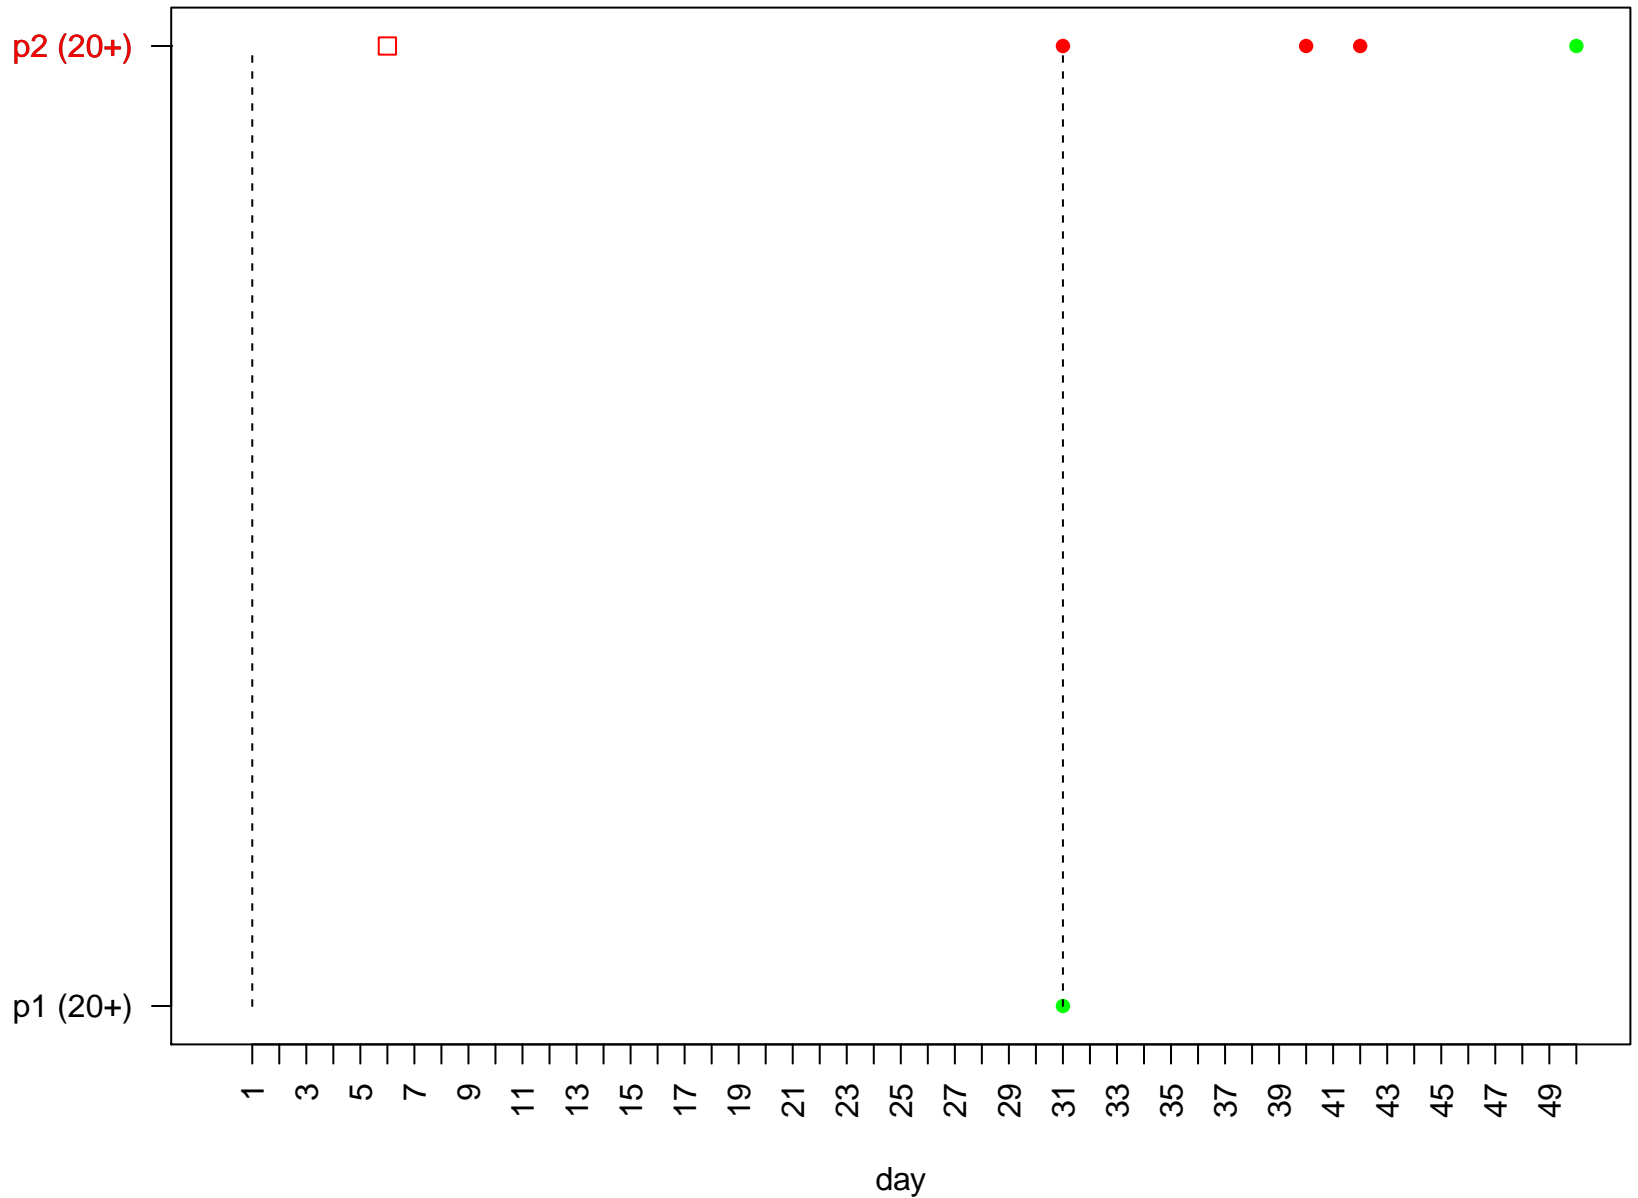





# Household 496

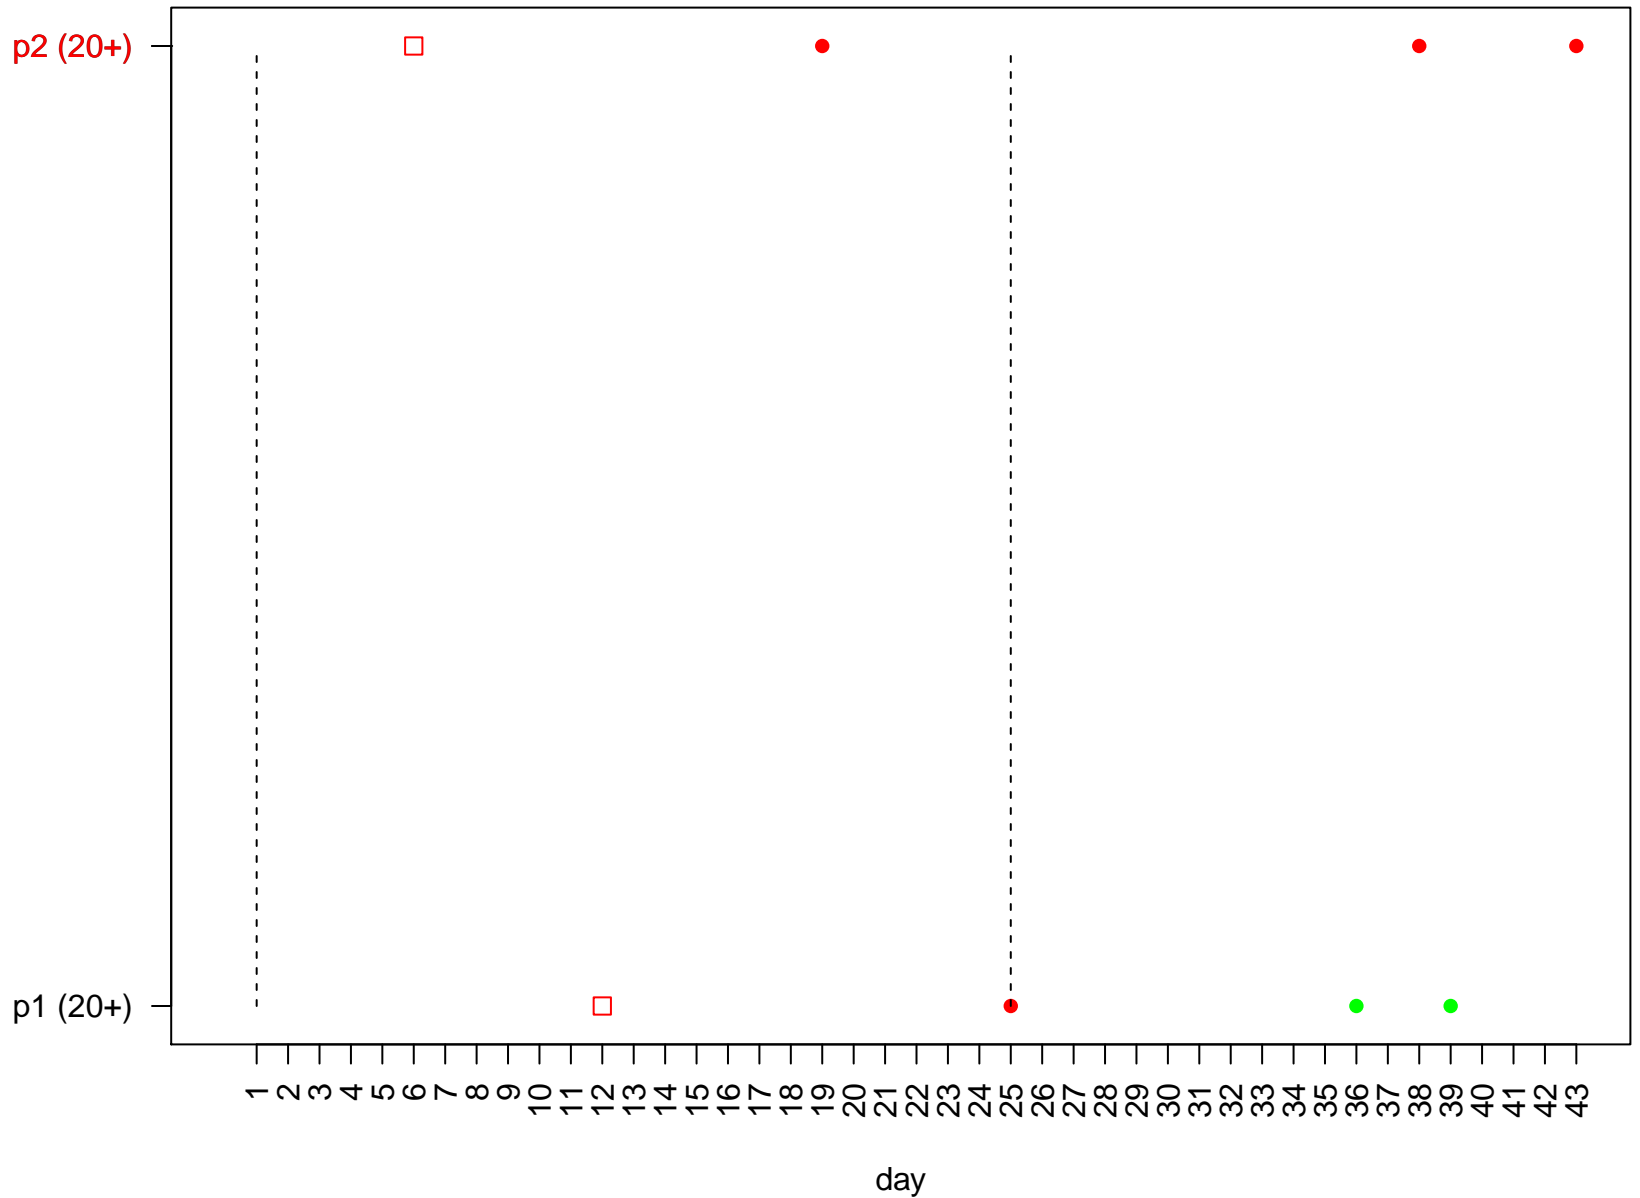

# Household 497

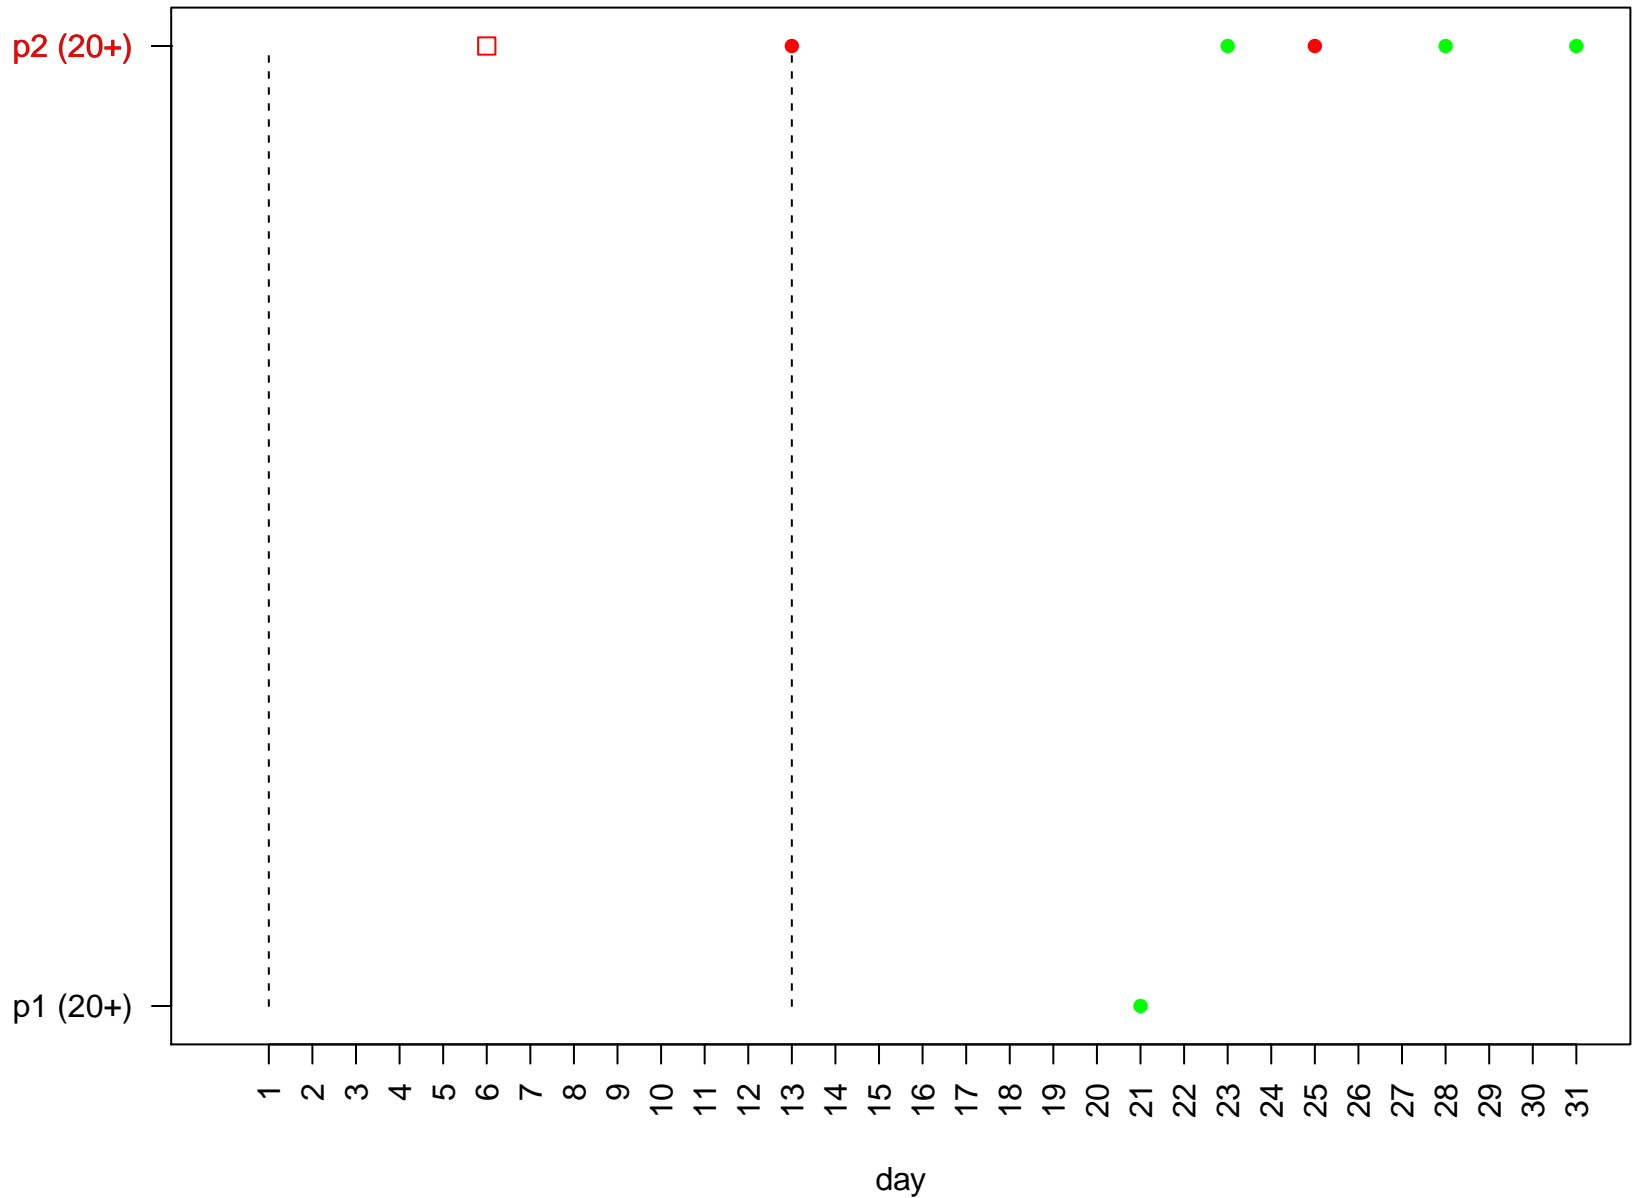

# Household 498

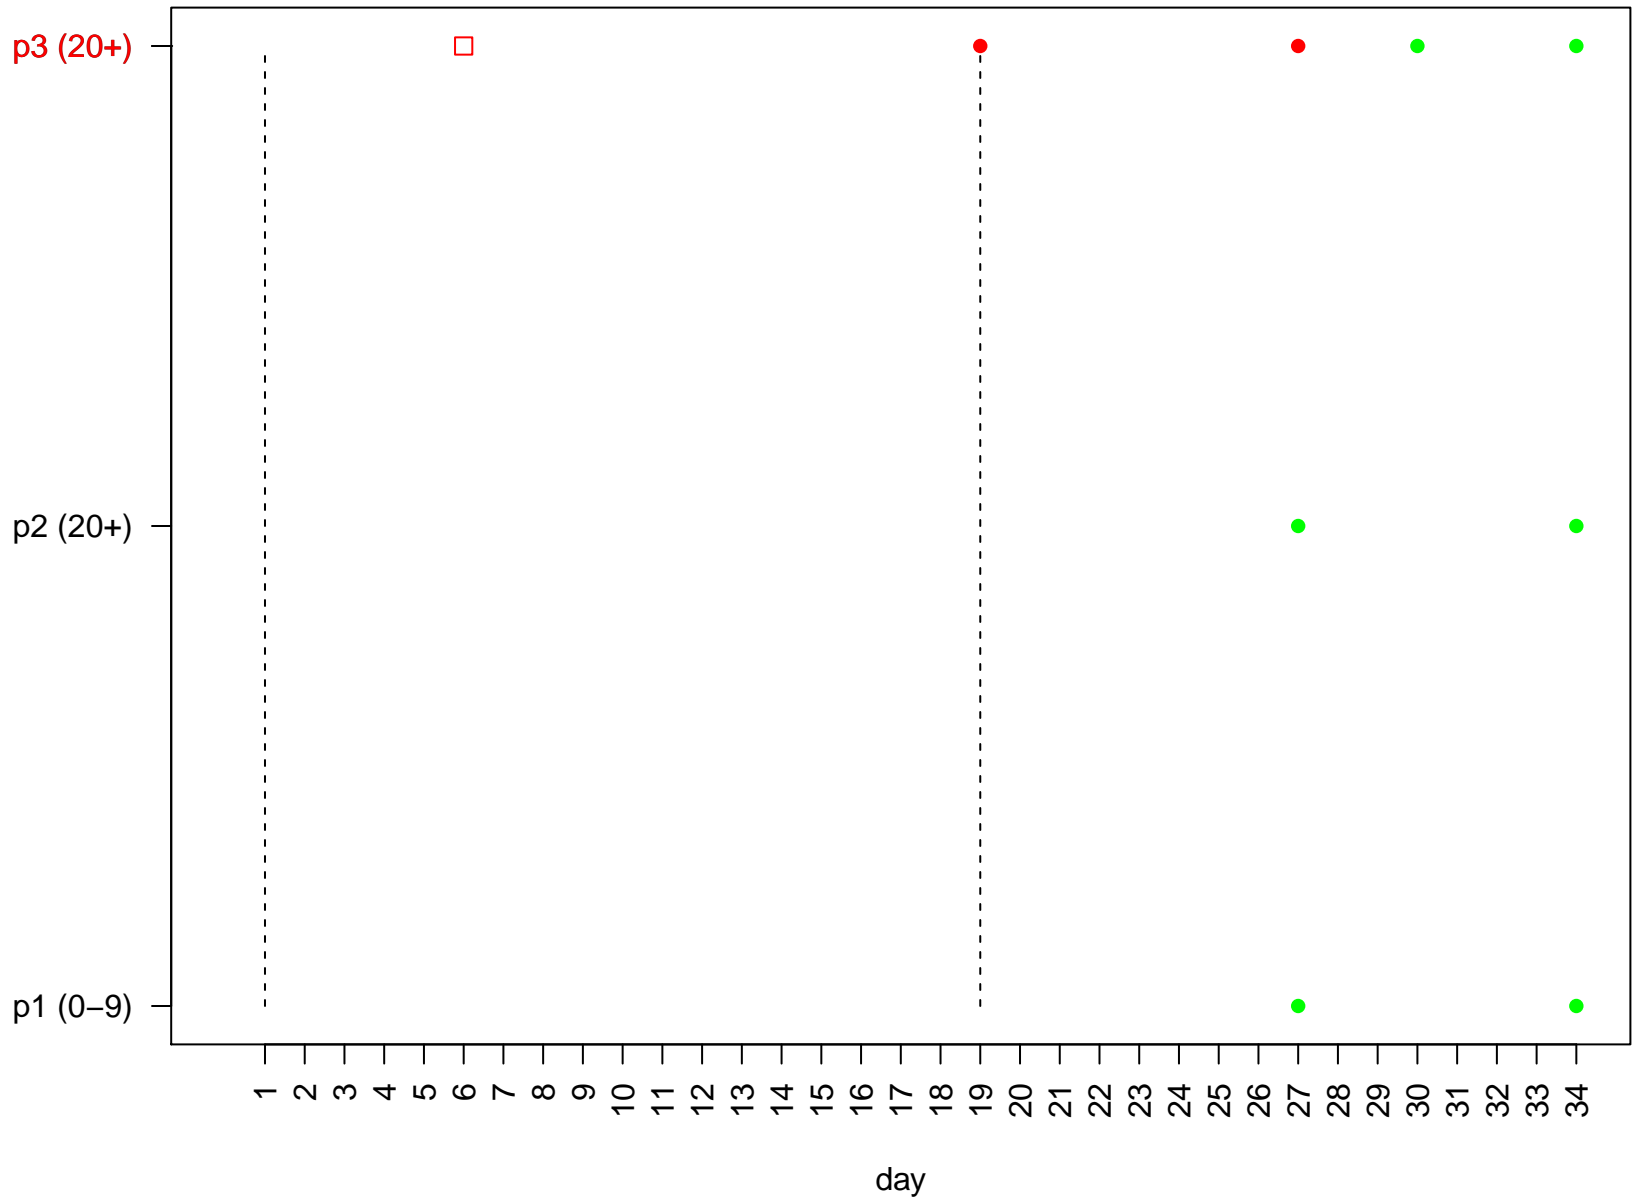

# Household 499

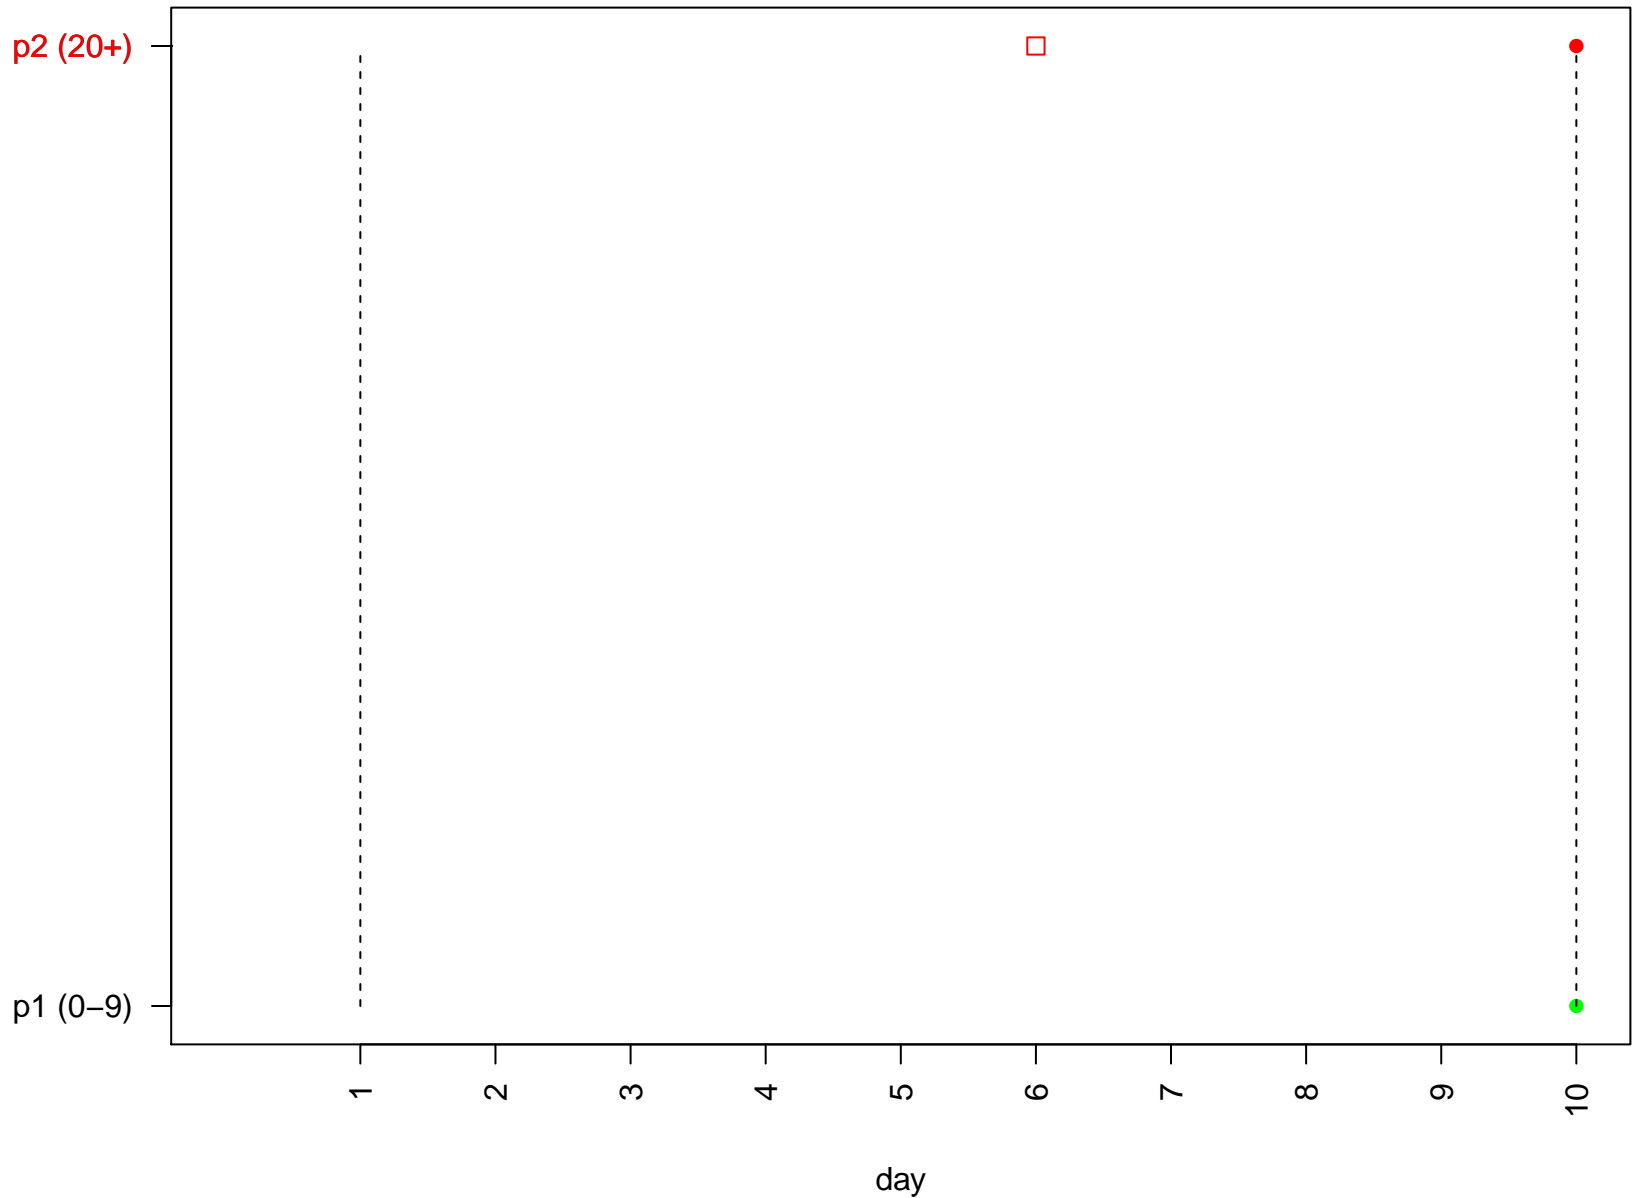

# Household 500

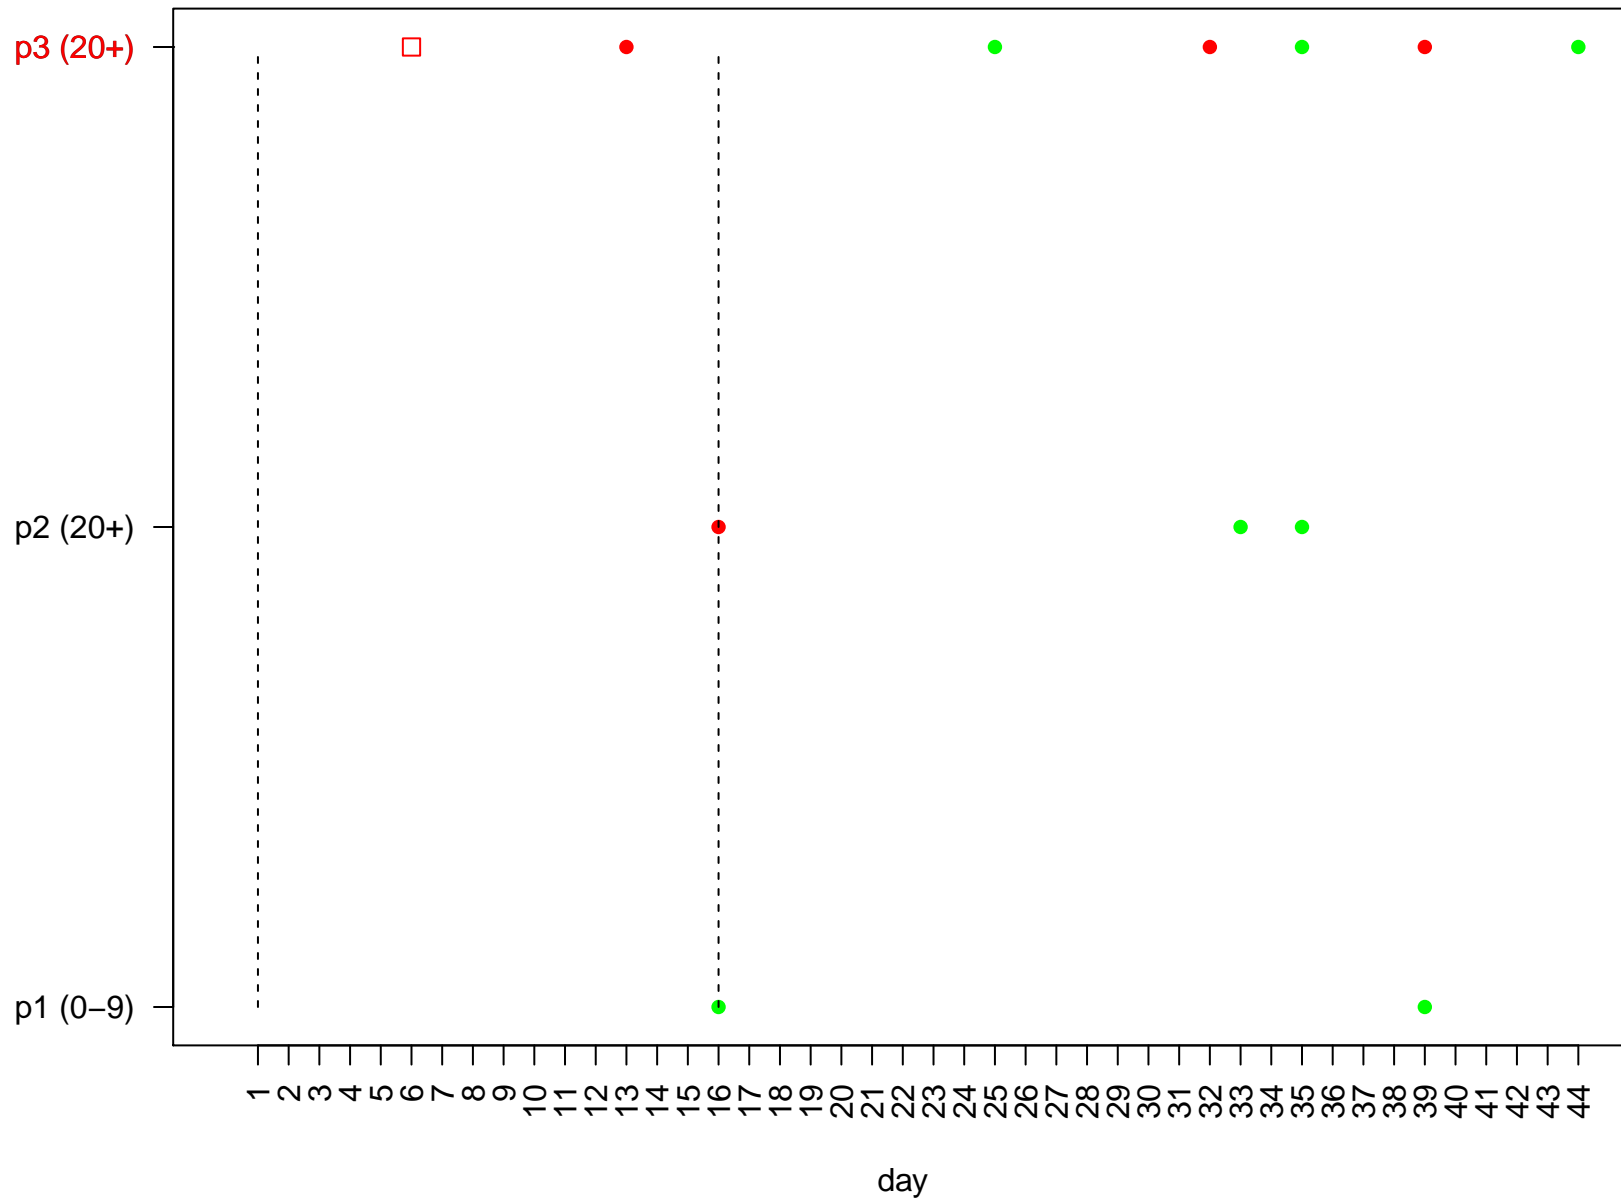

# Household 501

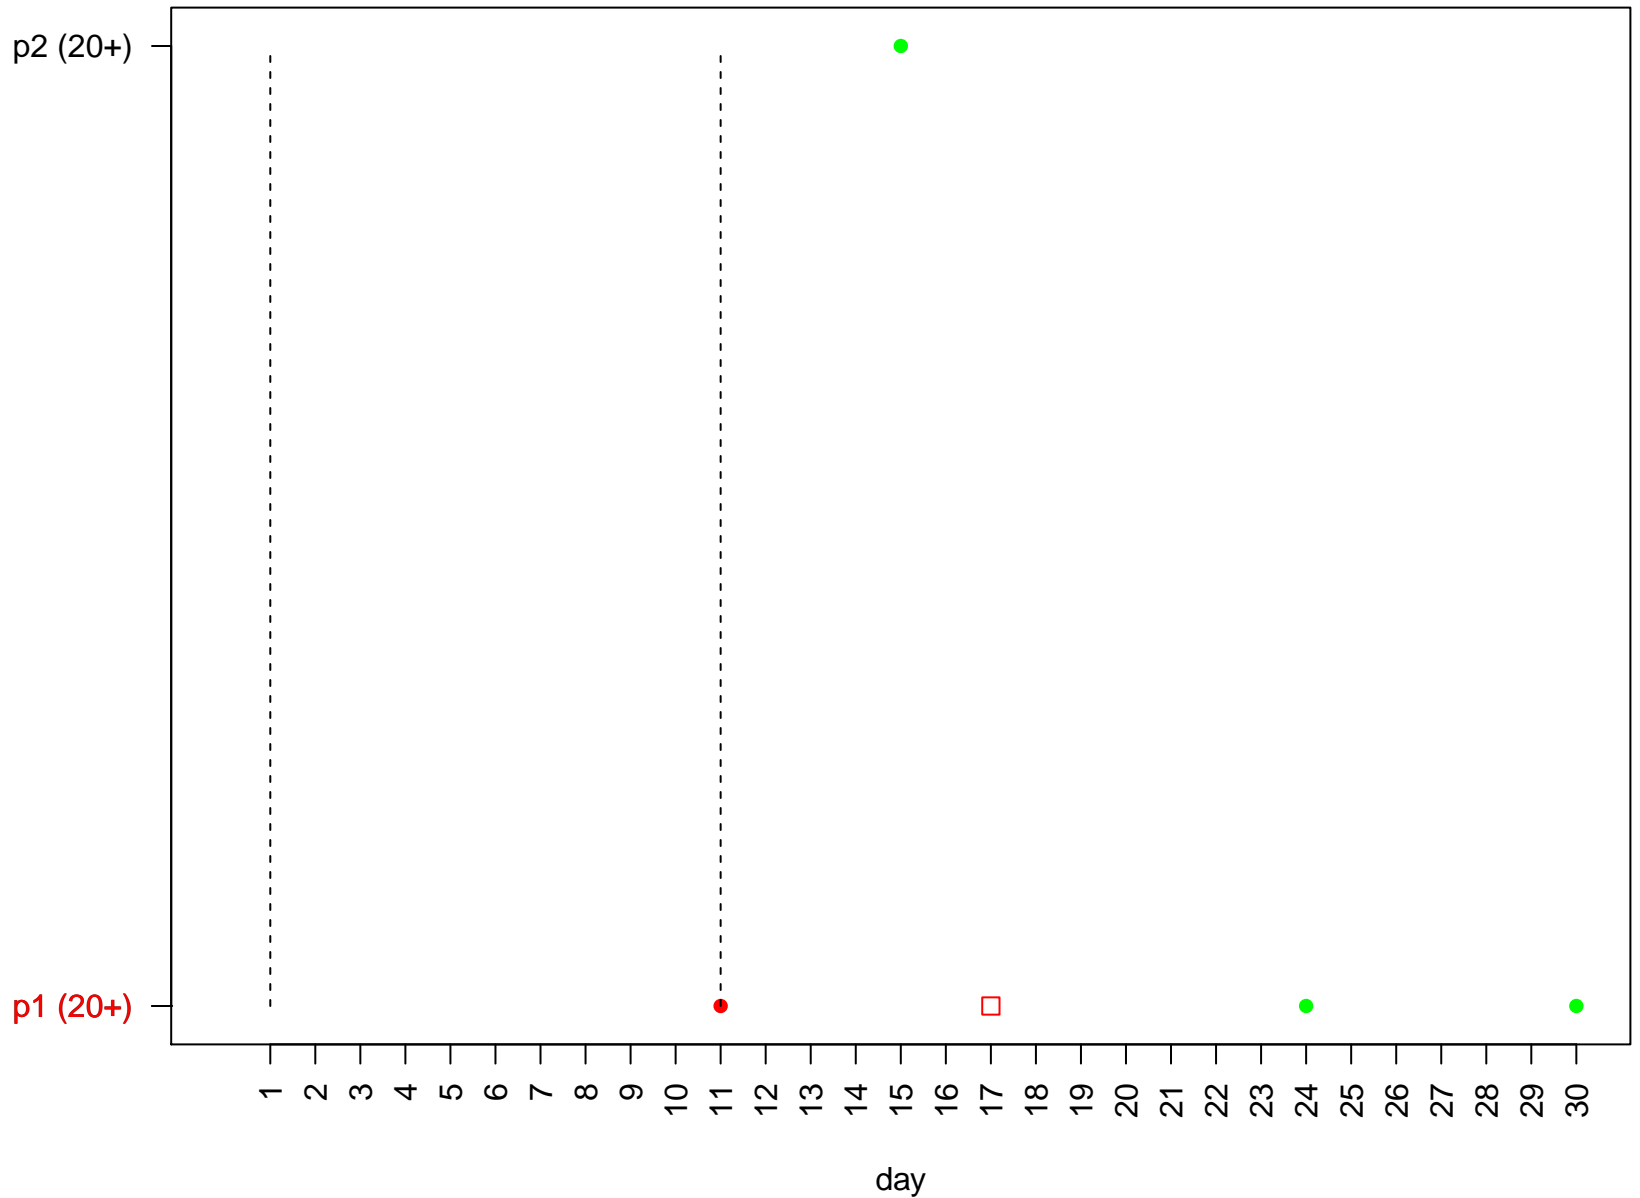

# Household 502

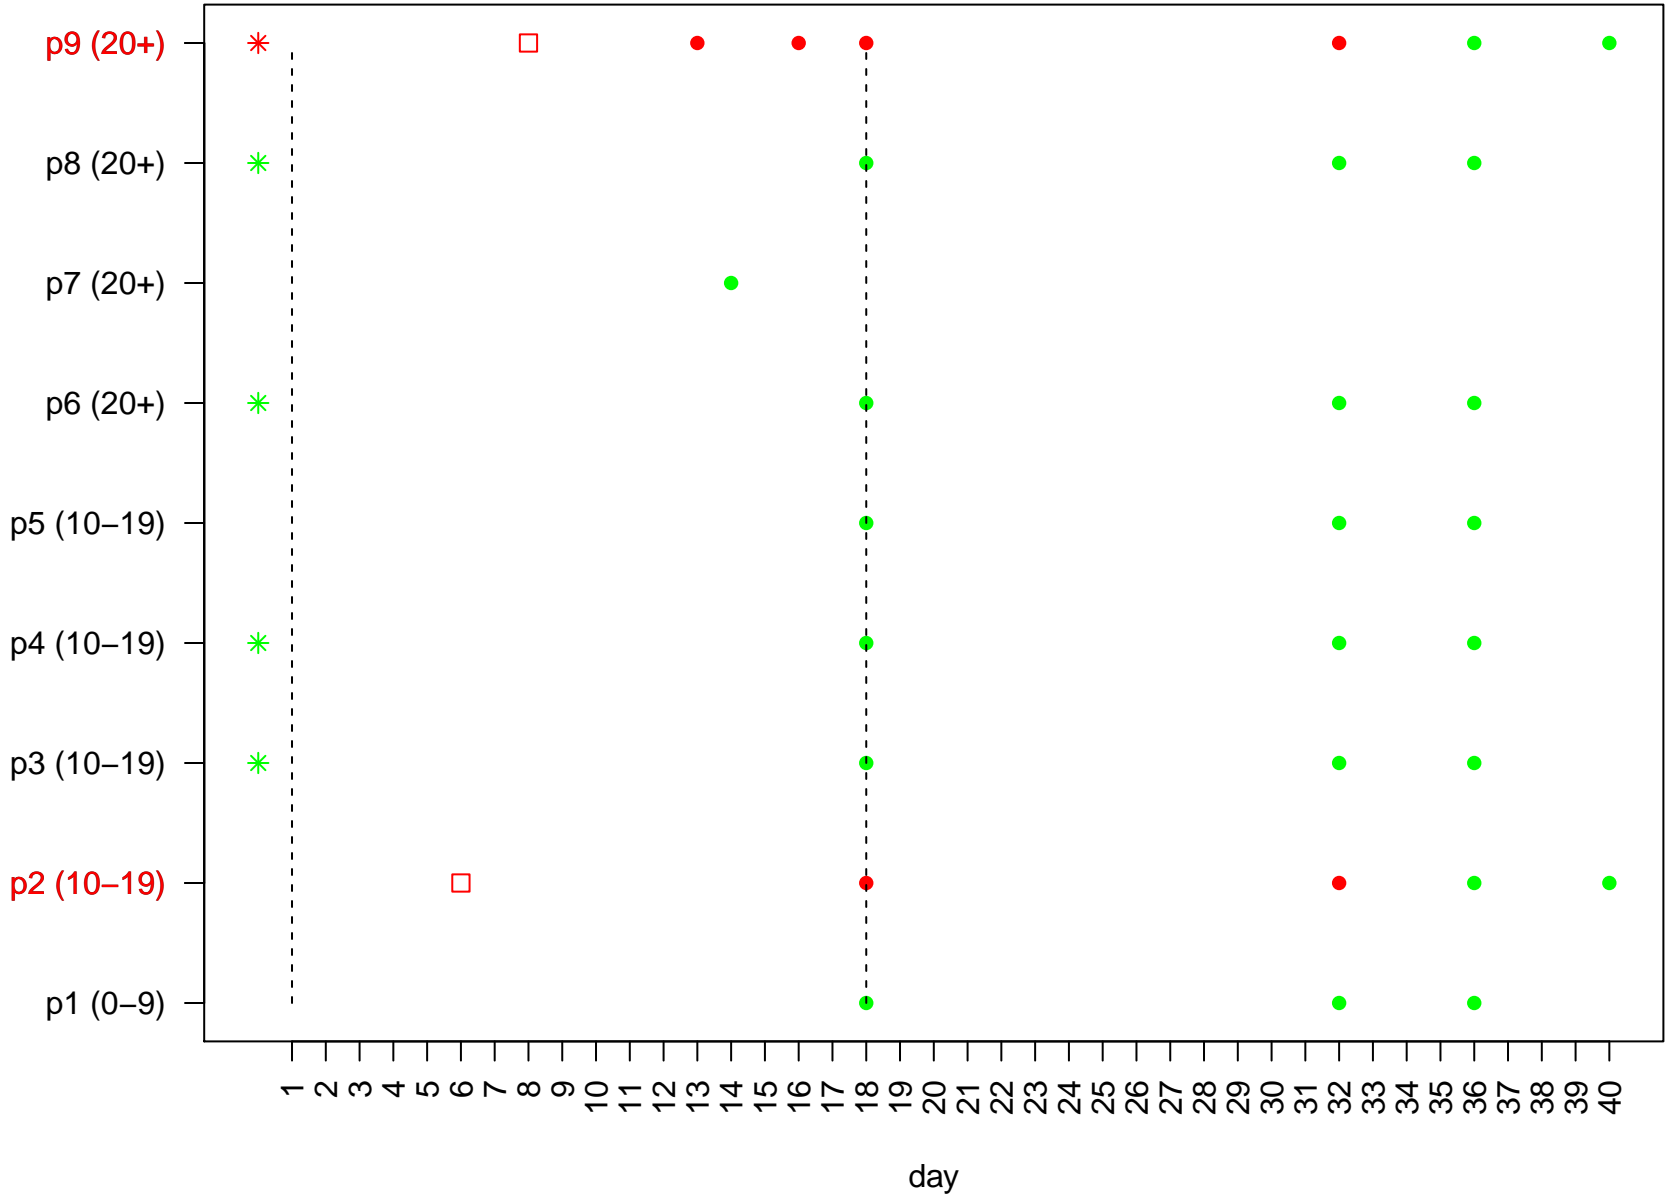



# Household 503

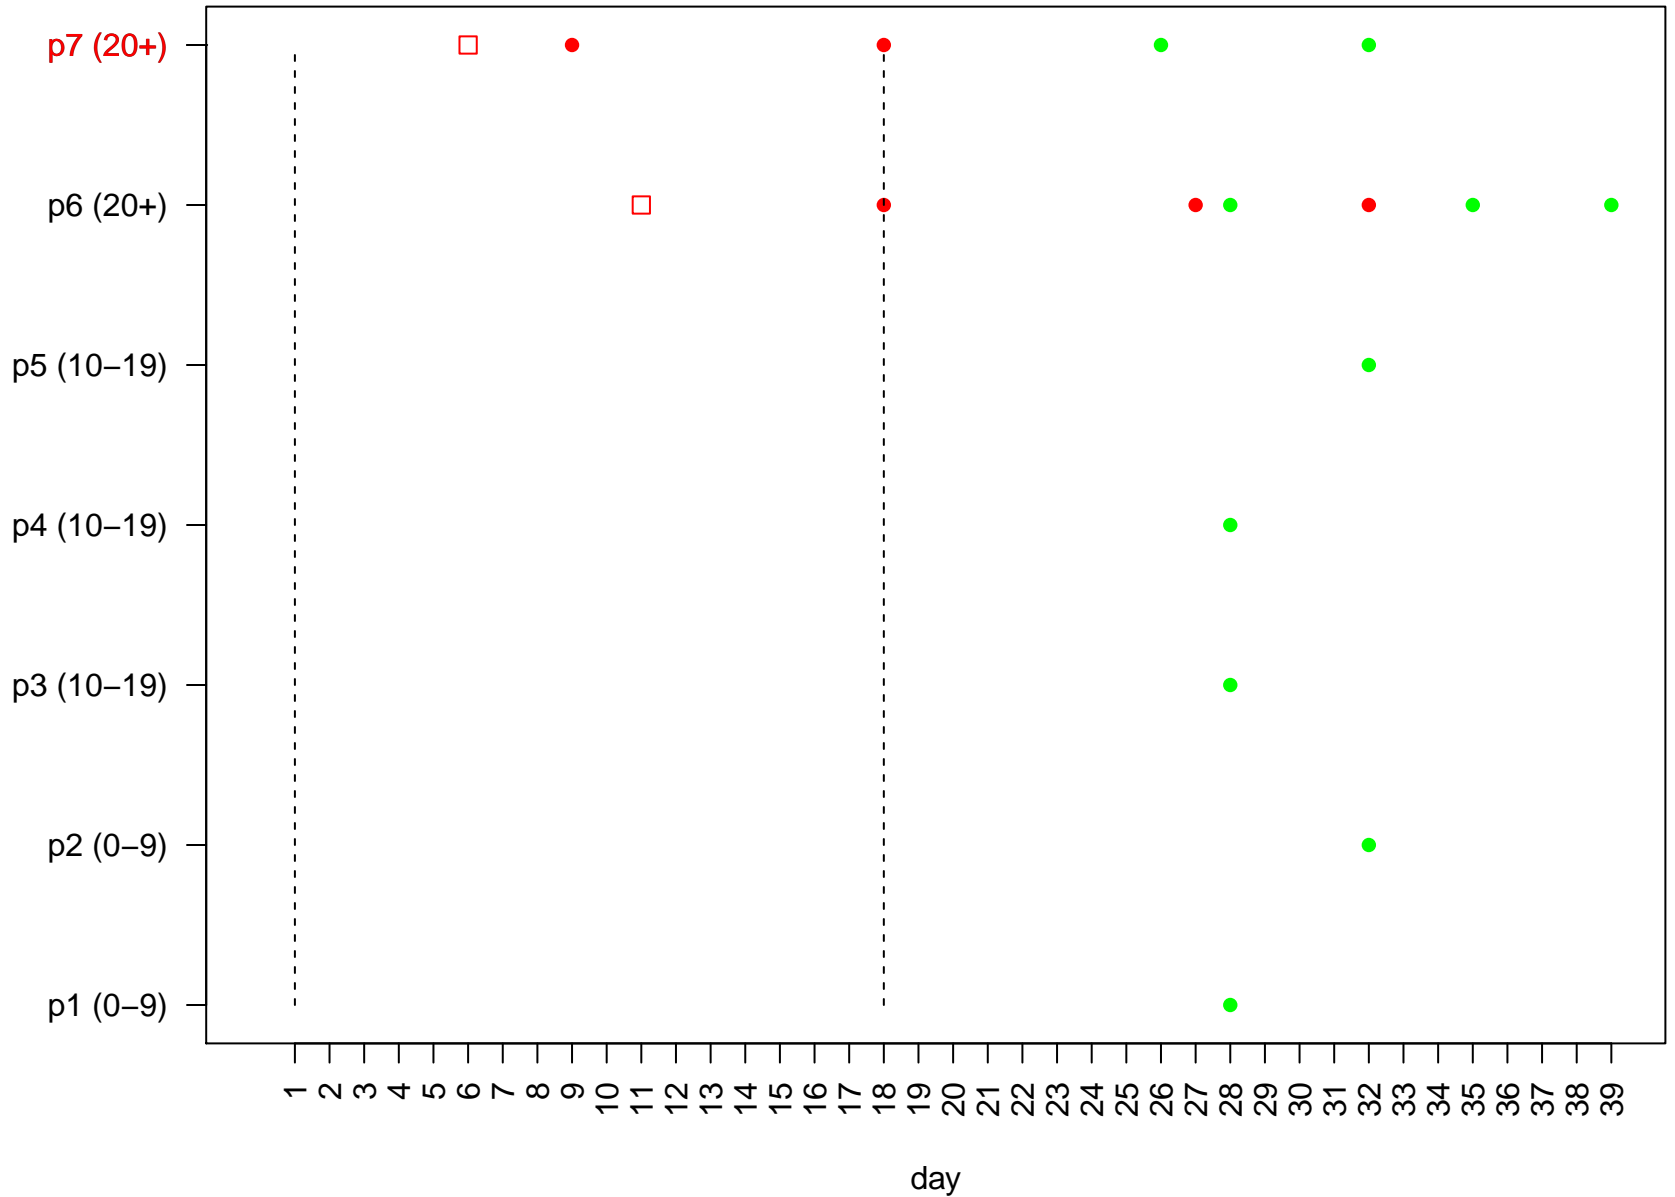

# Household 504

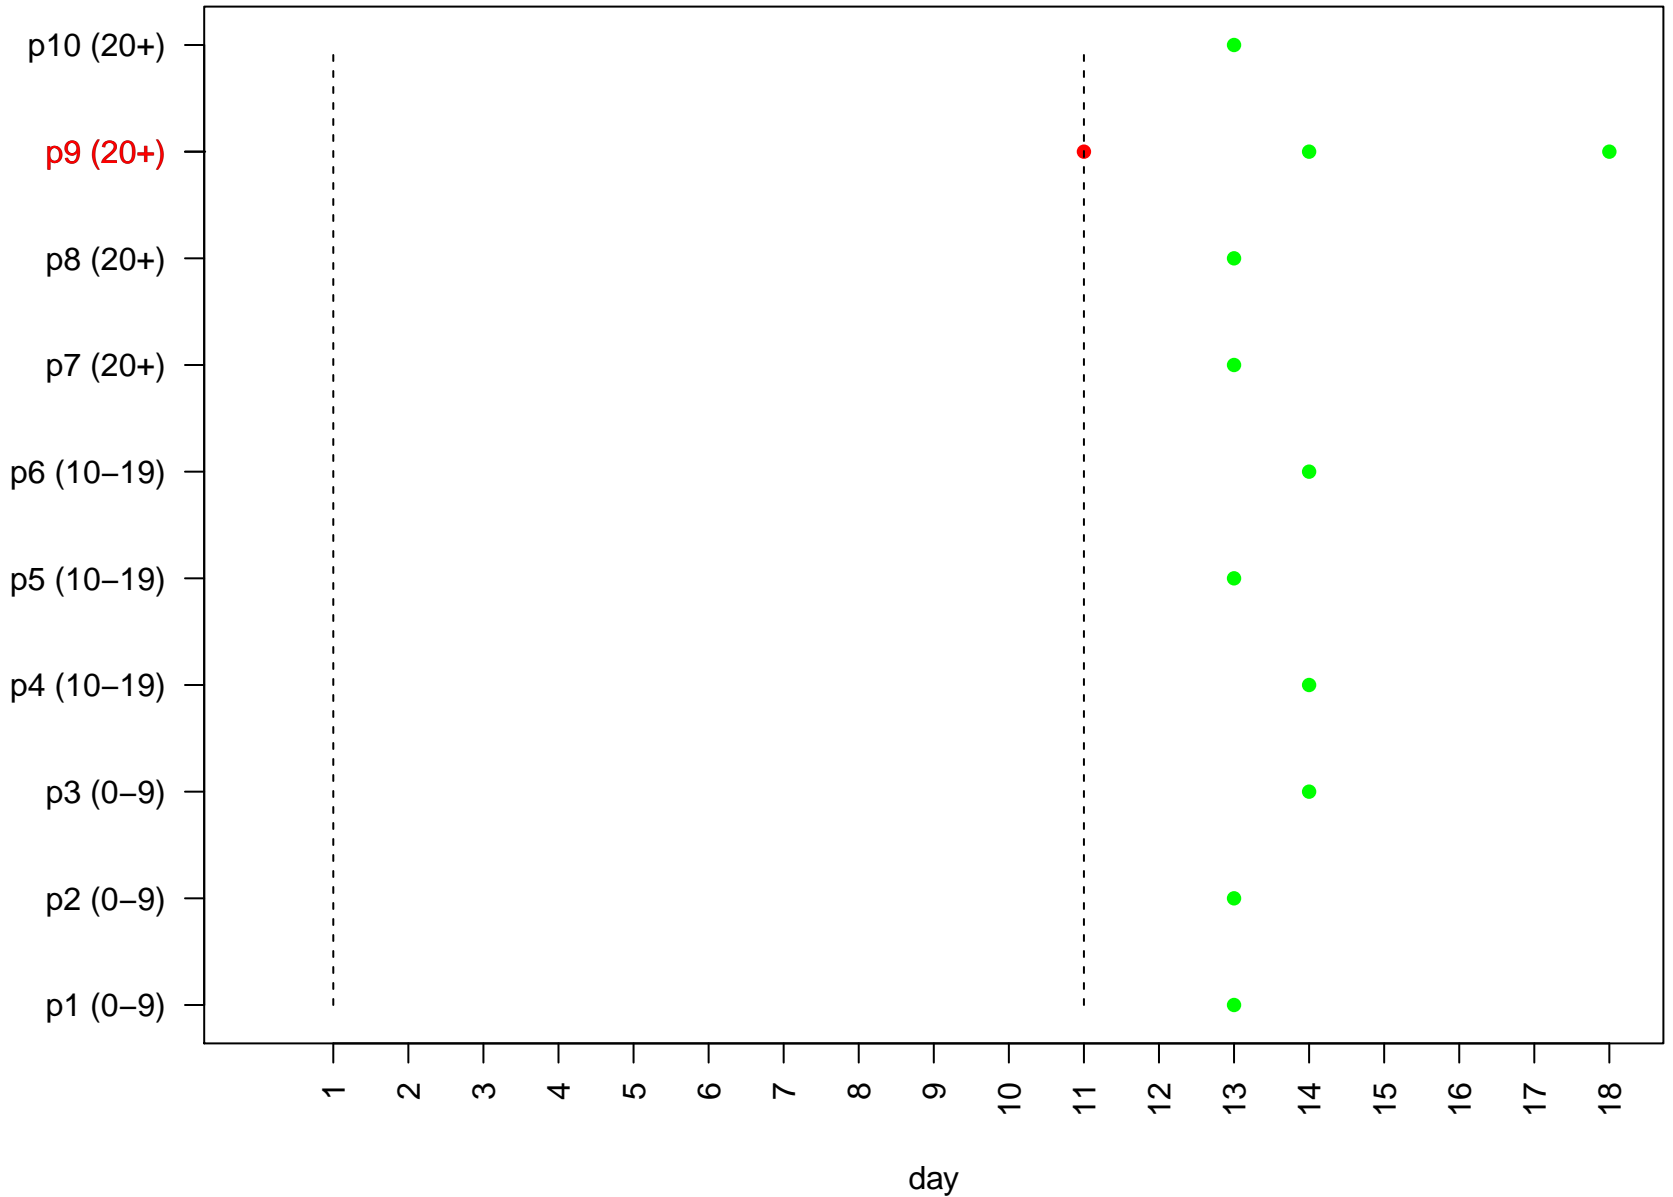



# Household 507

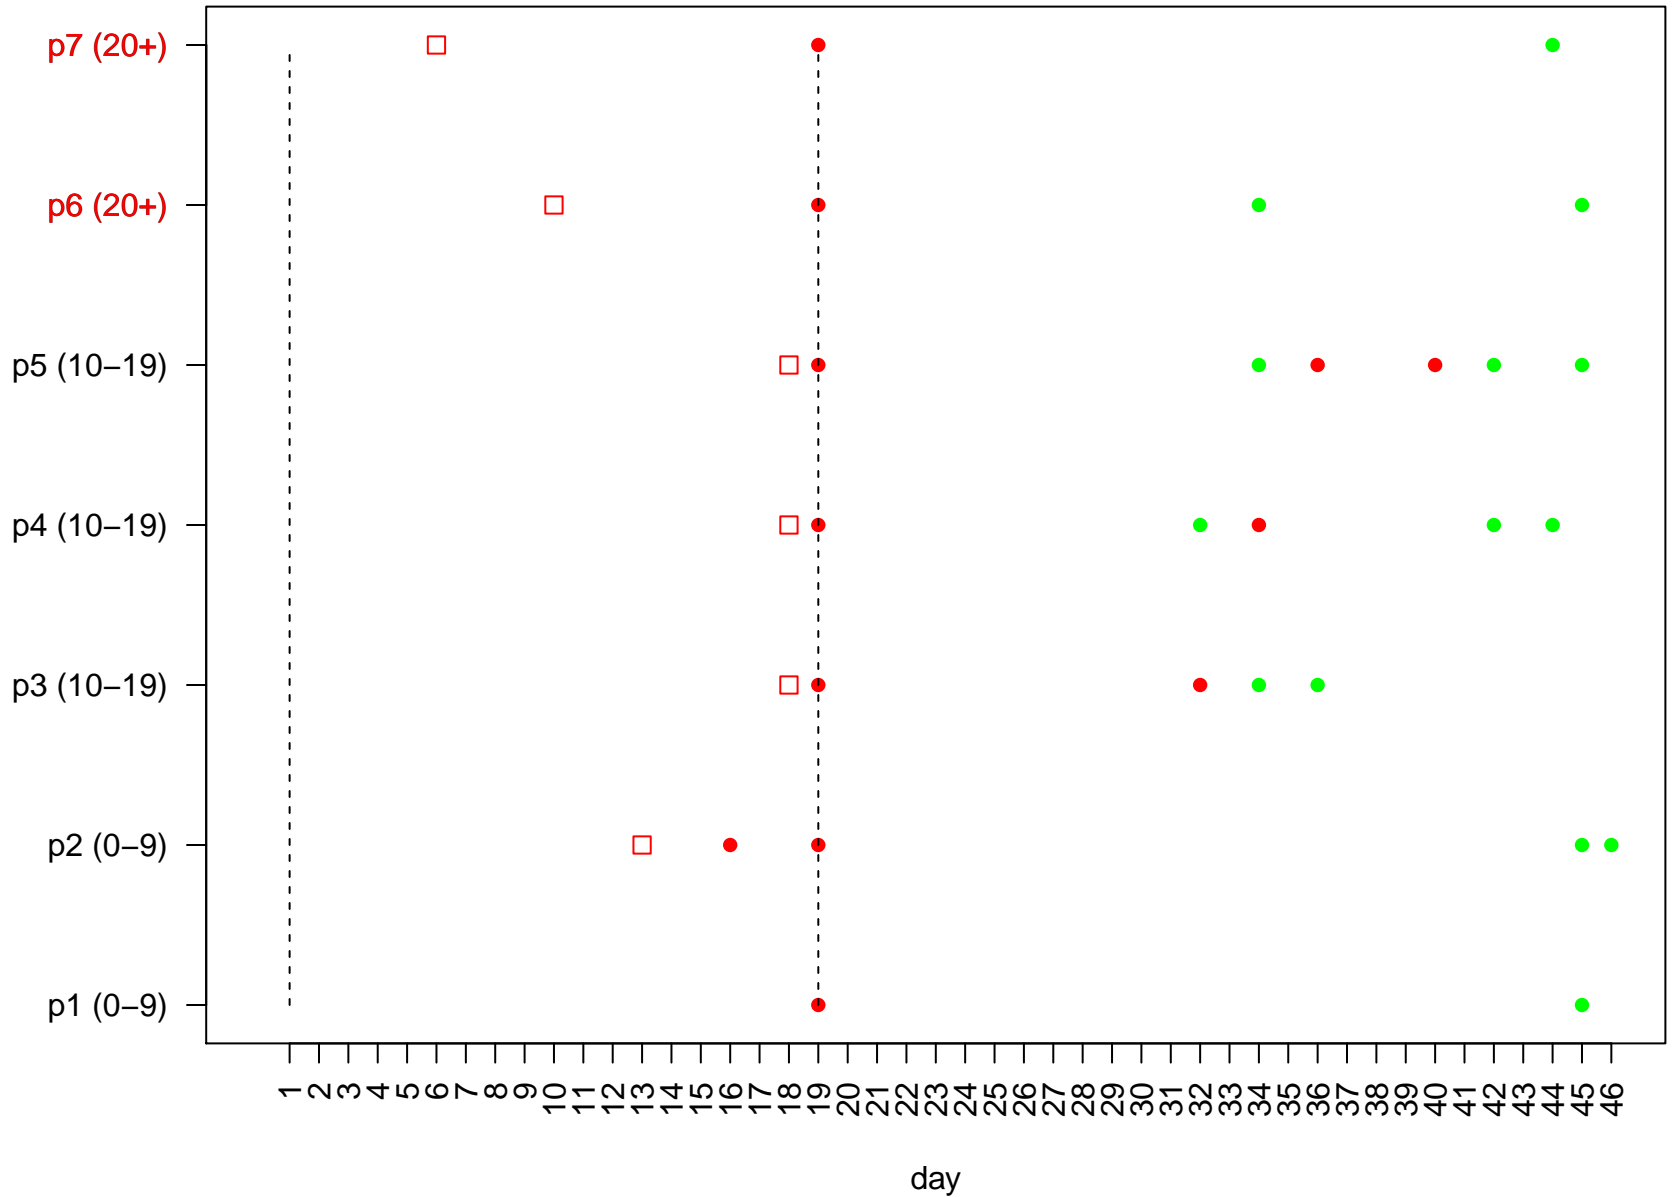

# Household 508

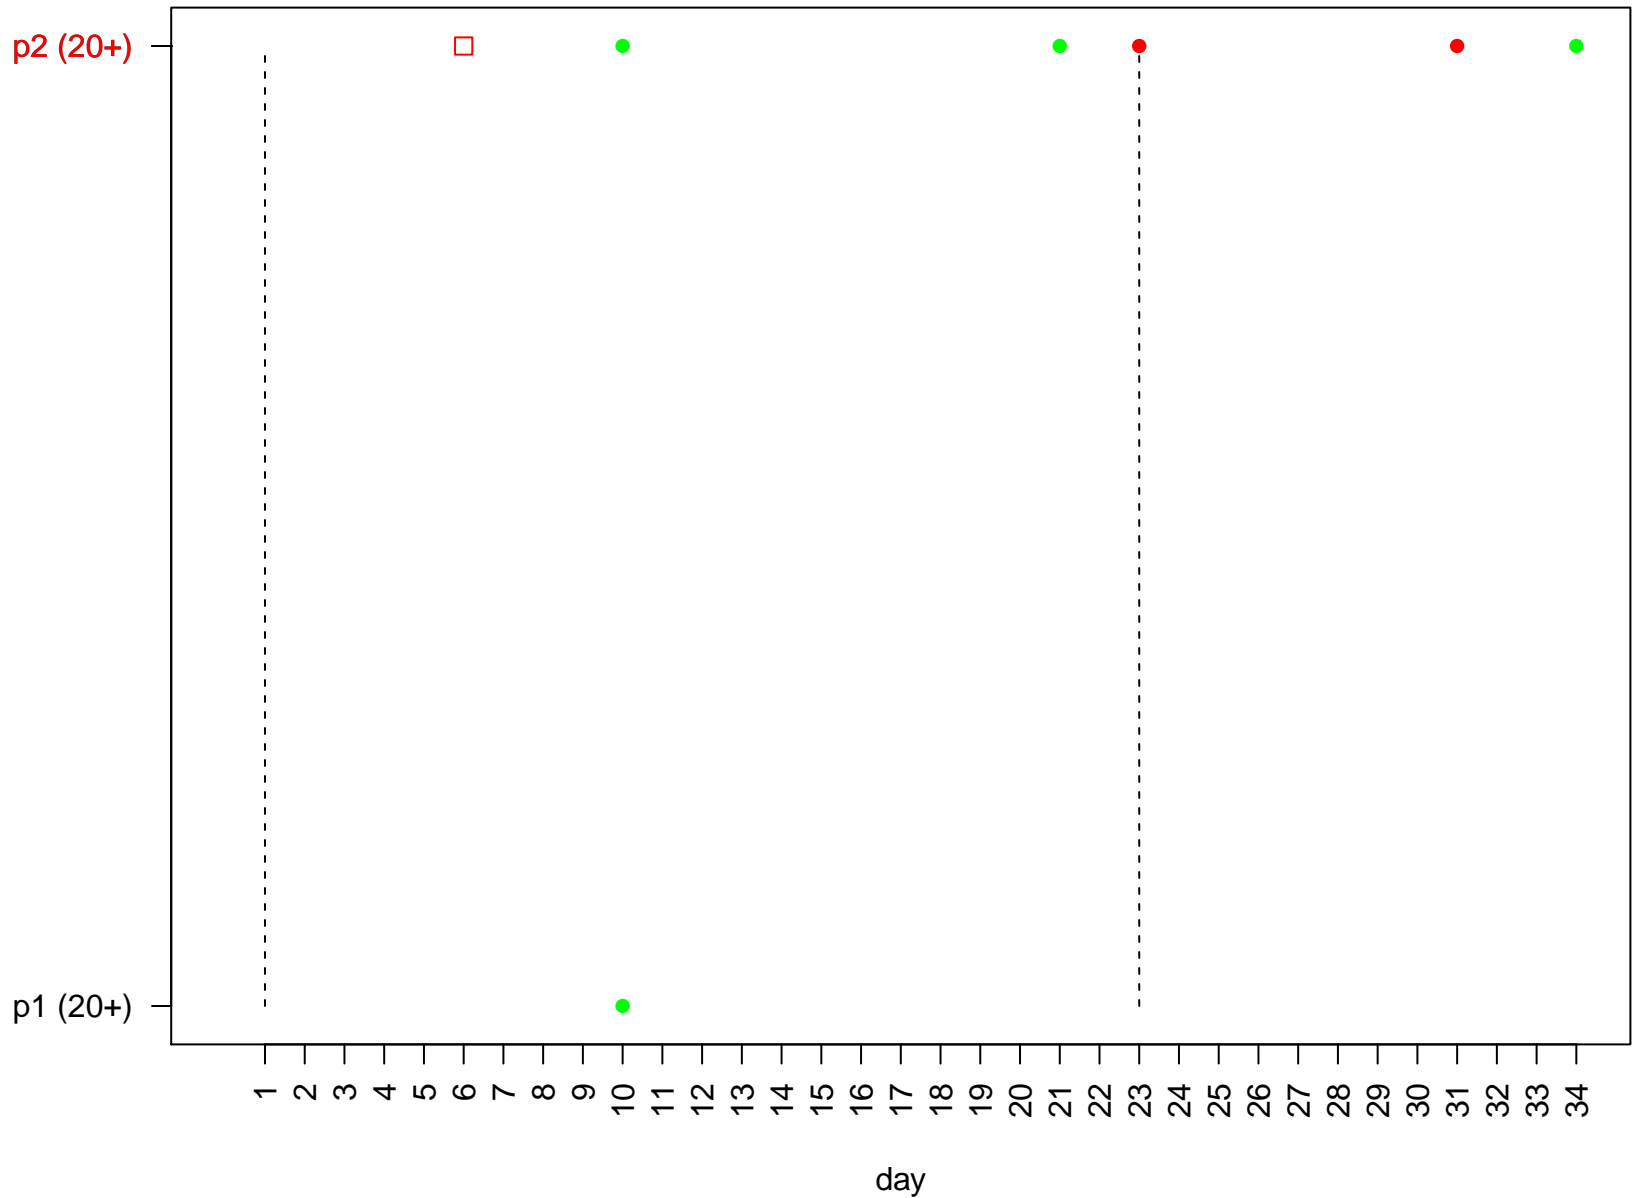

# Household 509

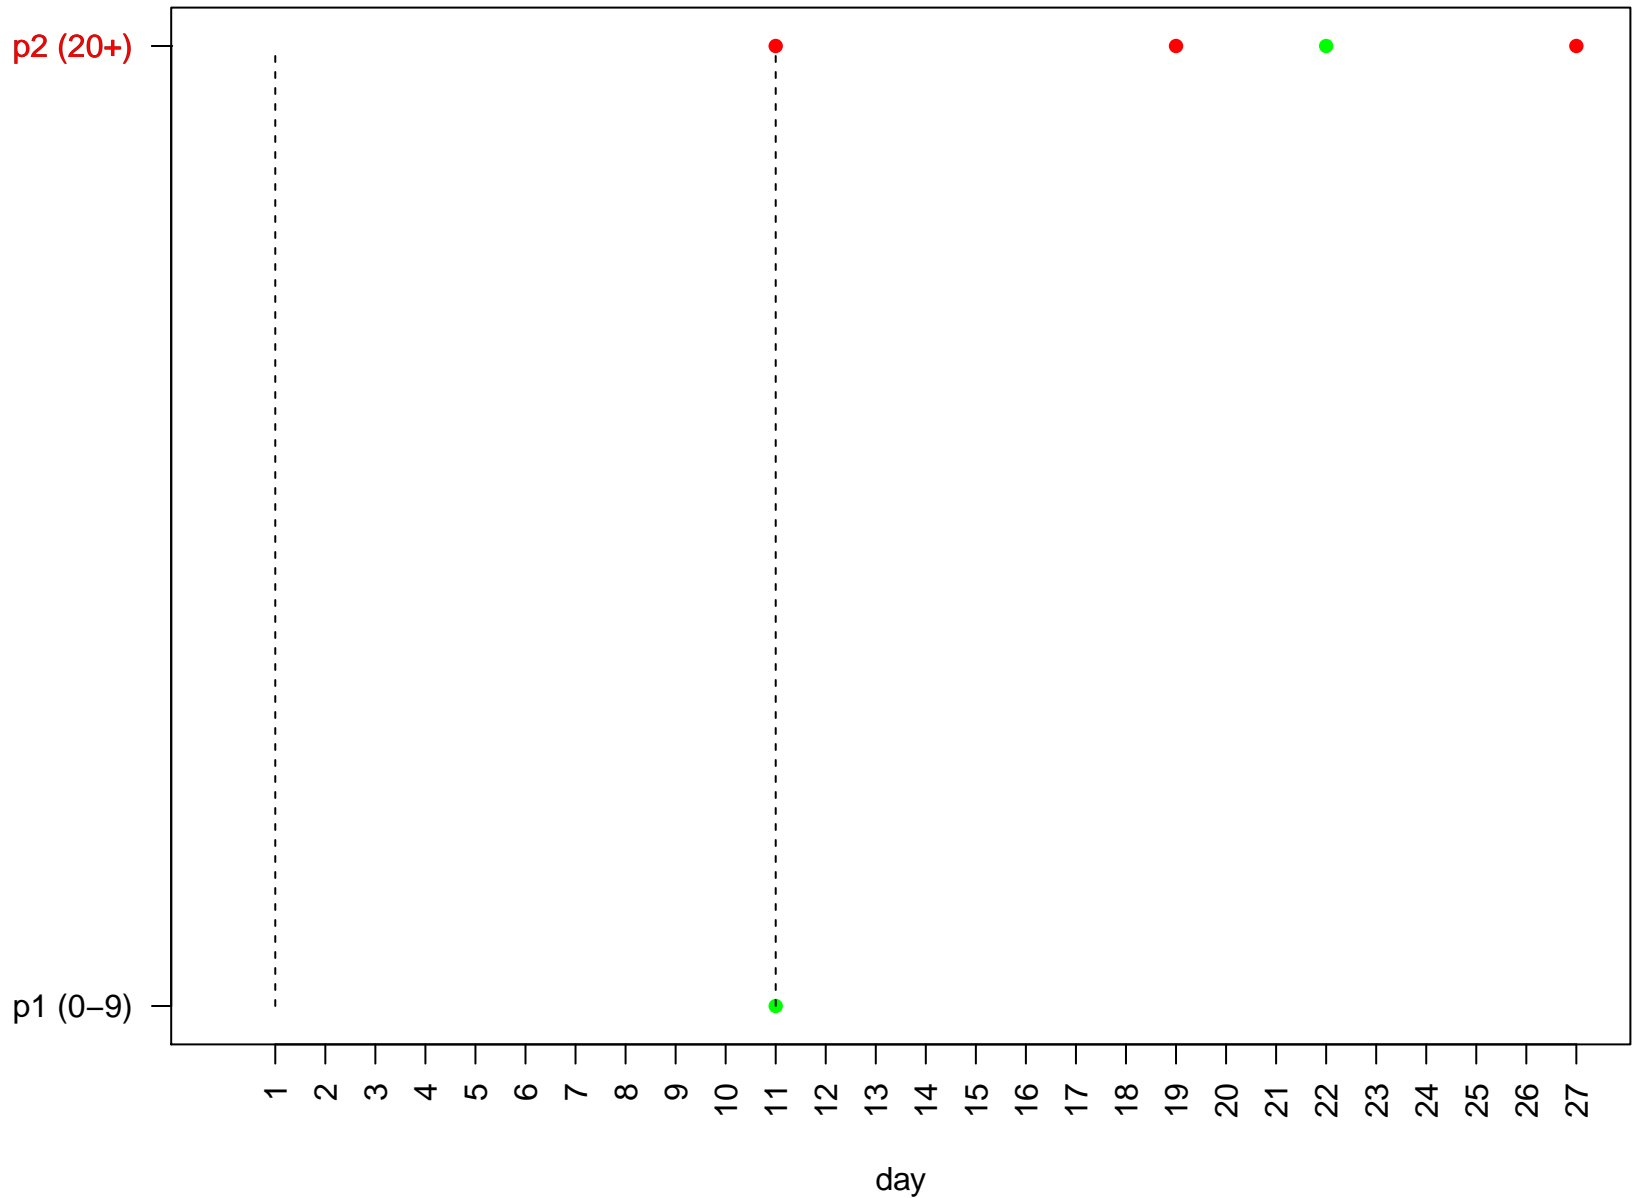

# Household 510

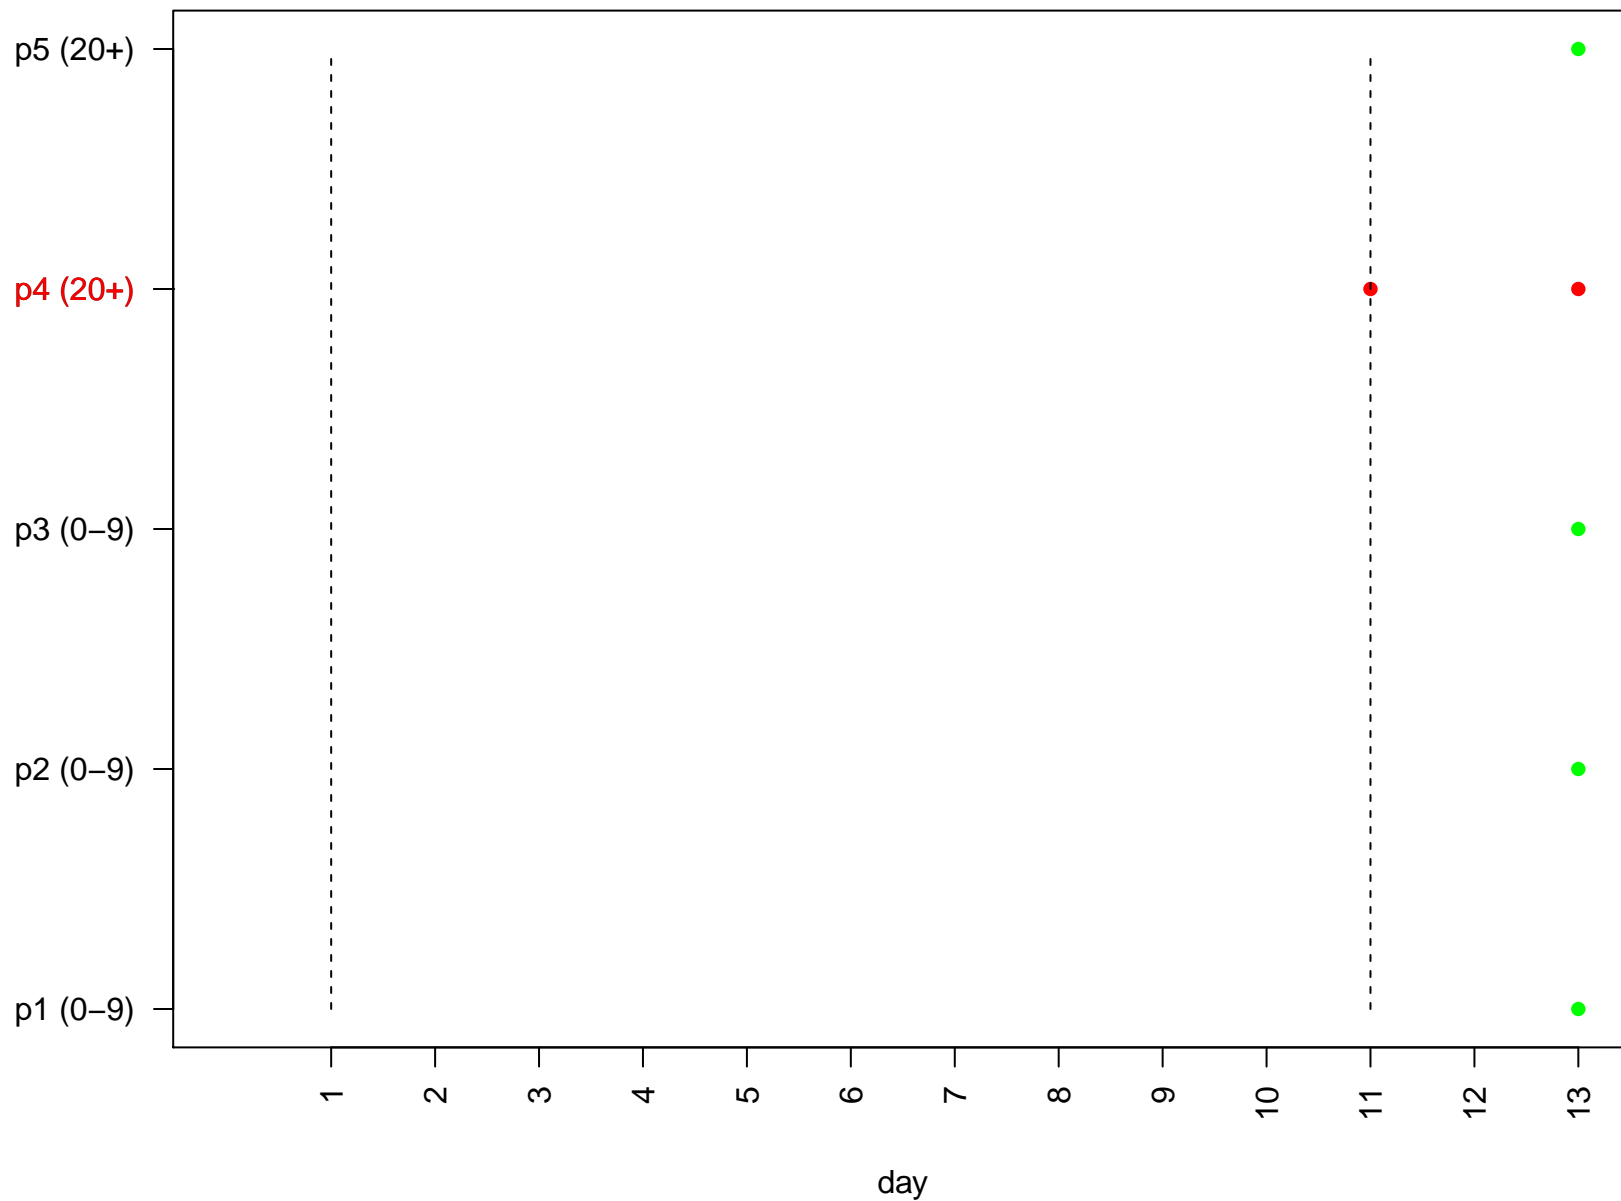

# Household 511

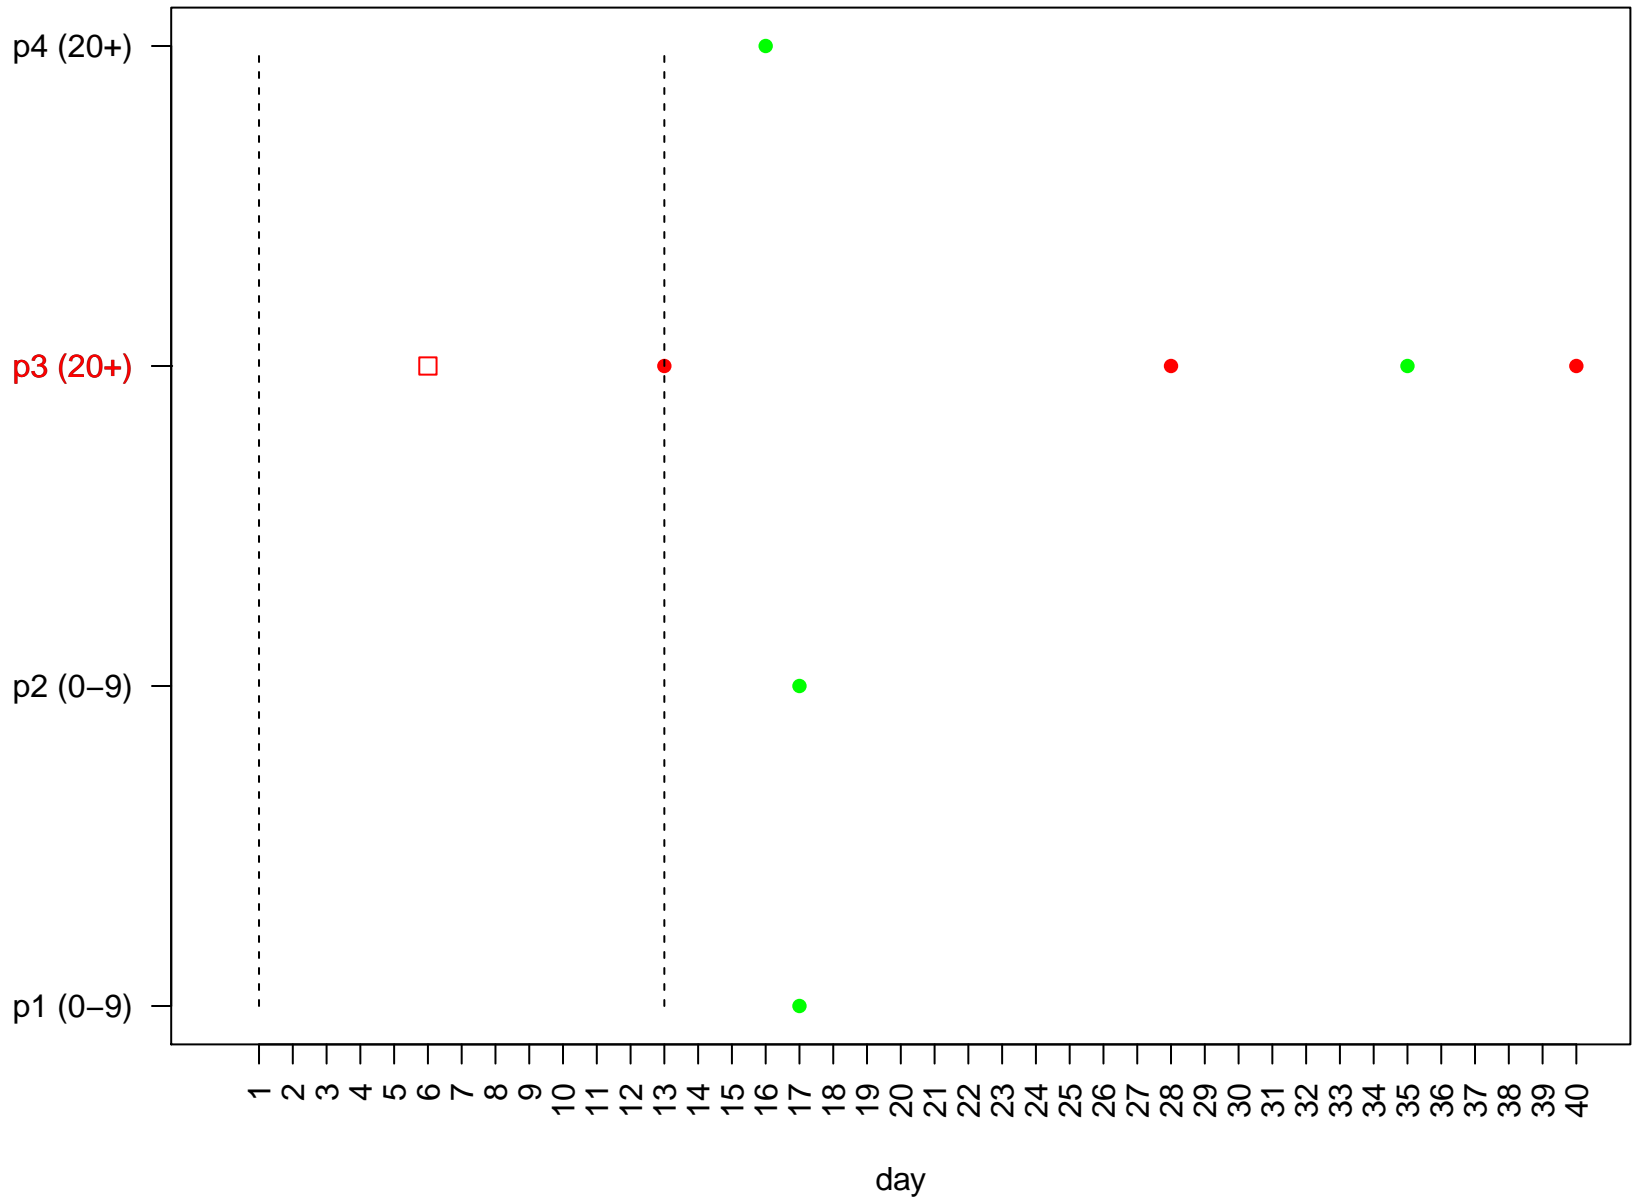



# Household 512

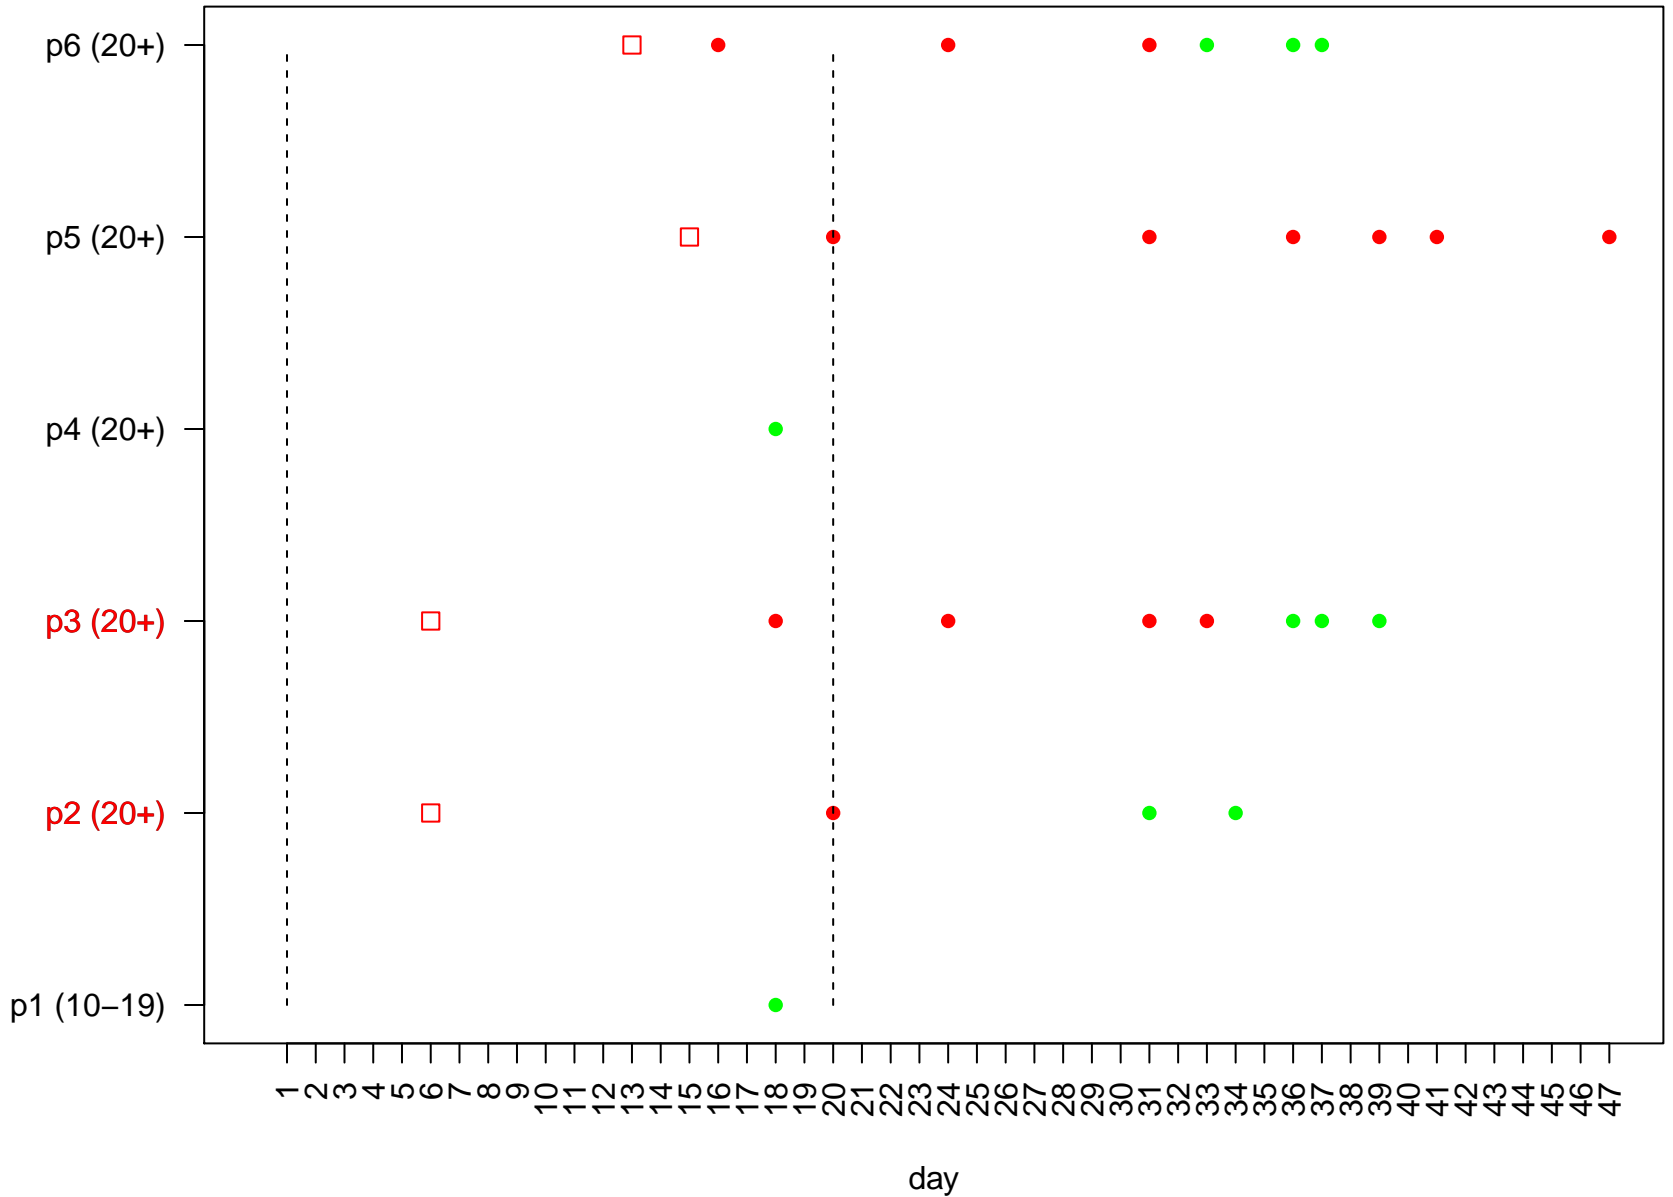

# Household 513

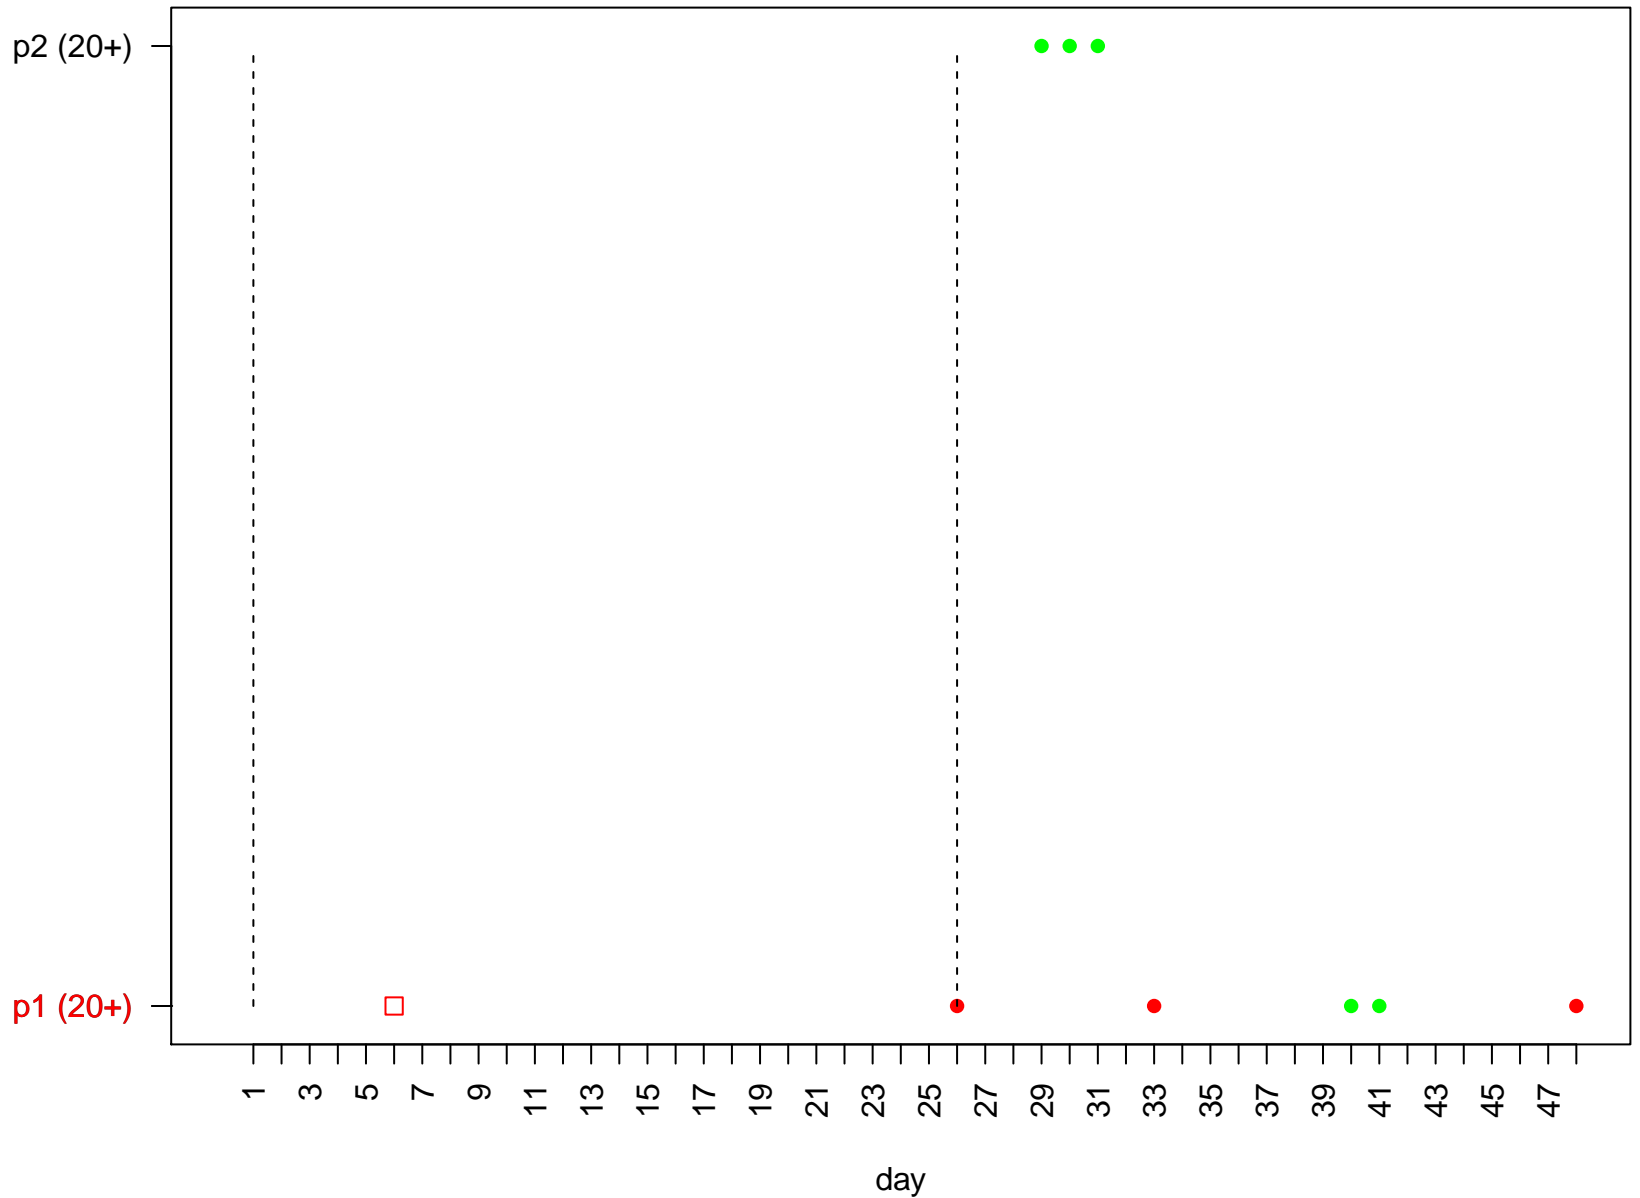

# Household 514

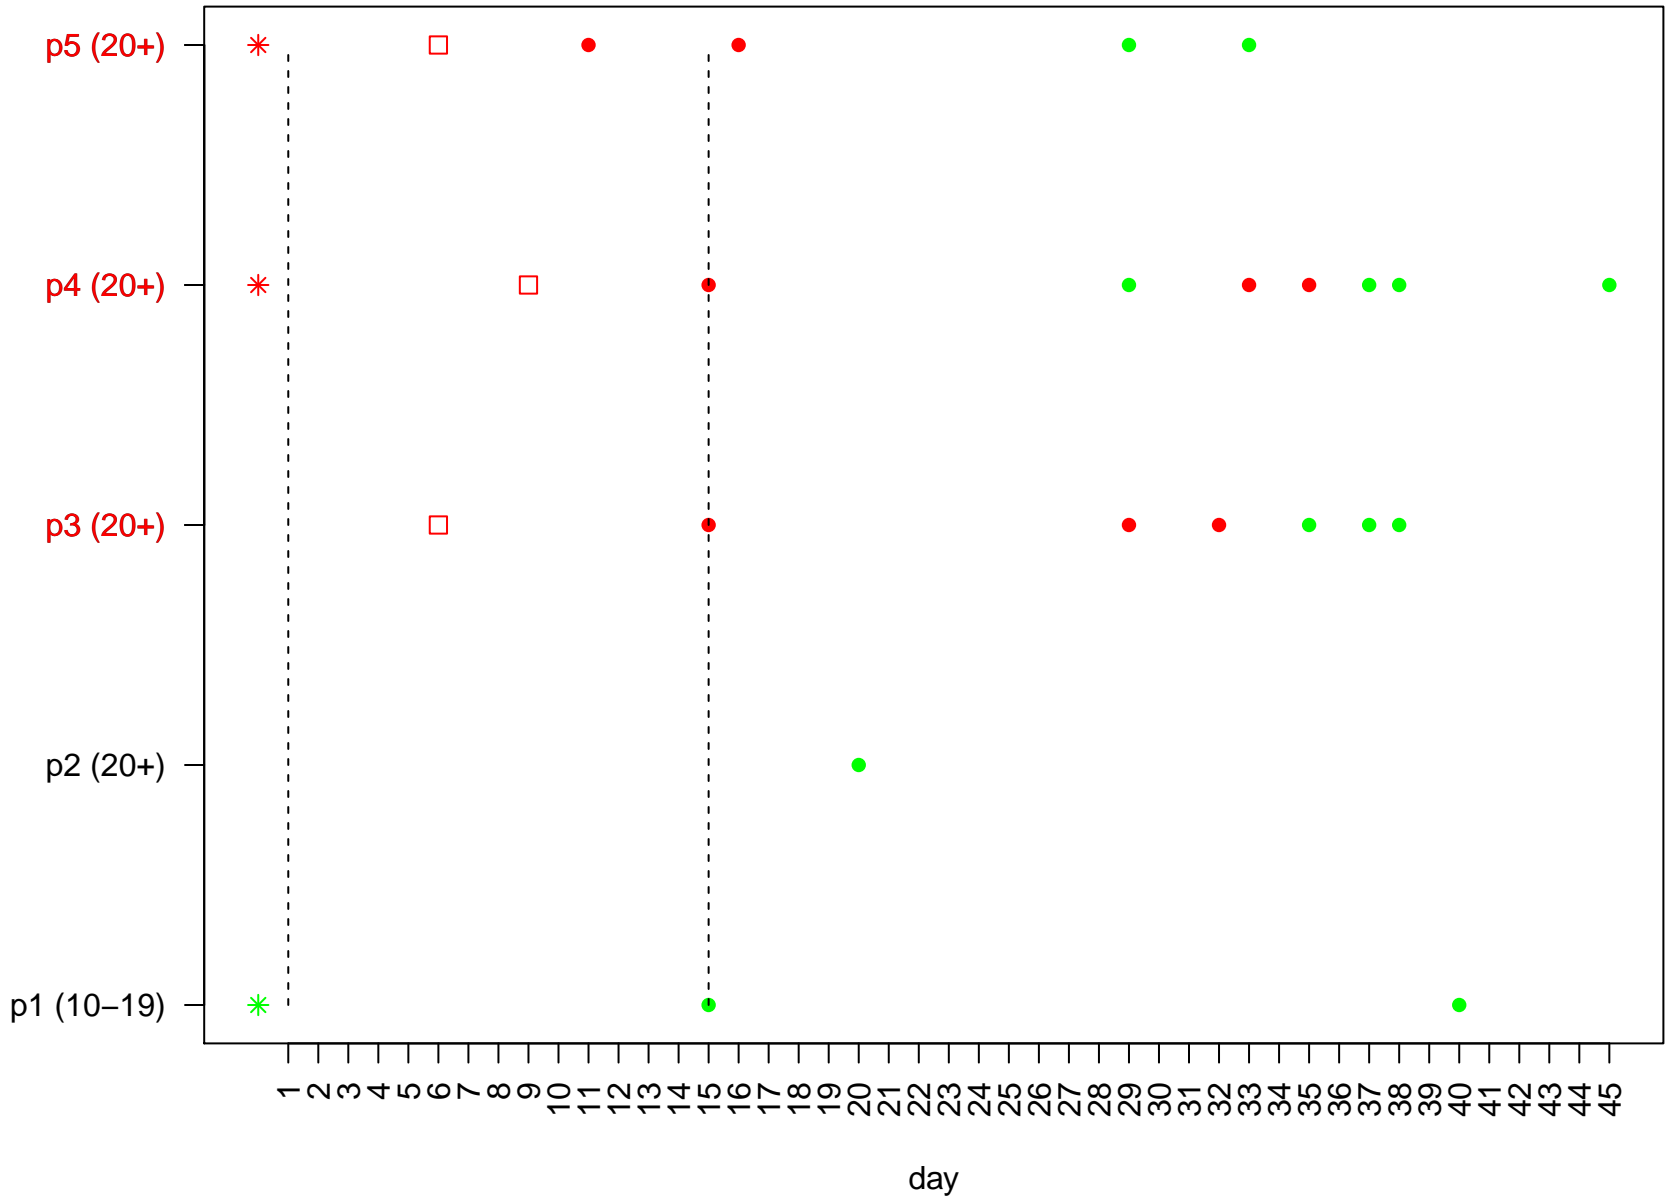

# Household 515

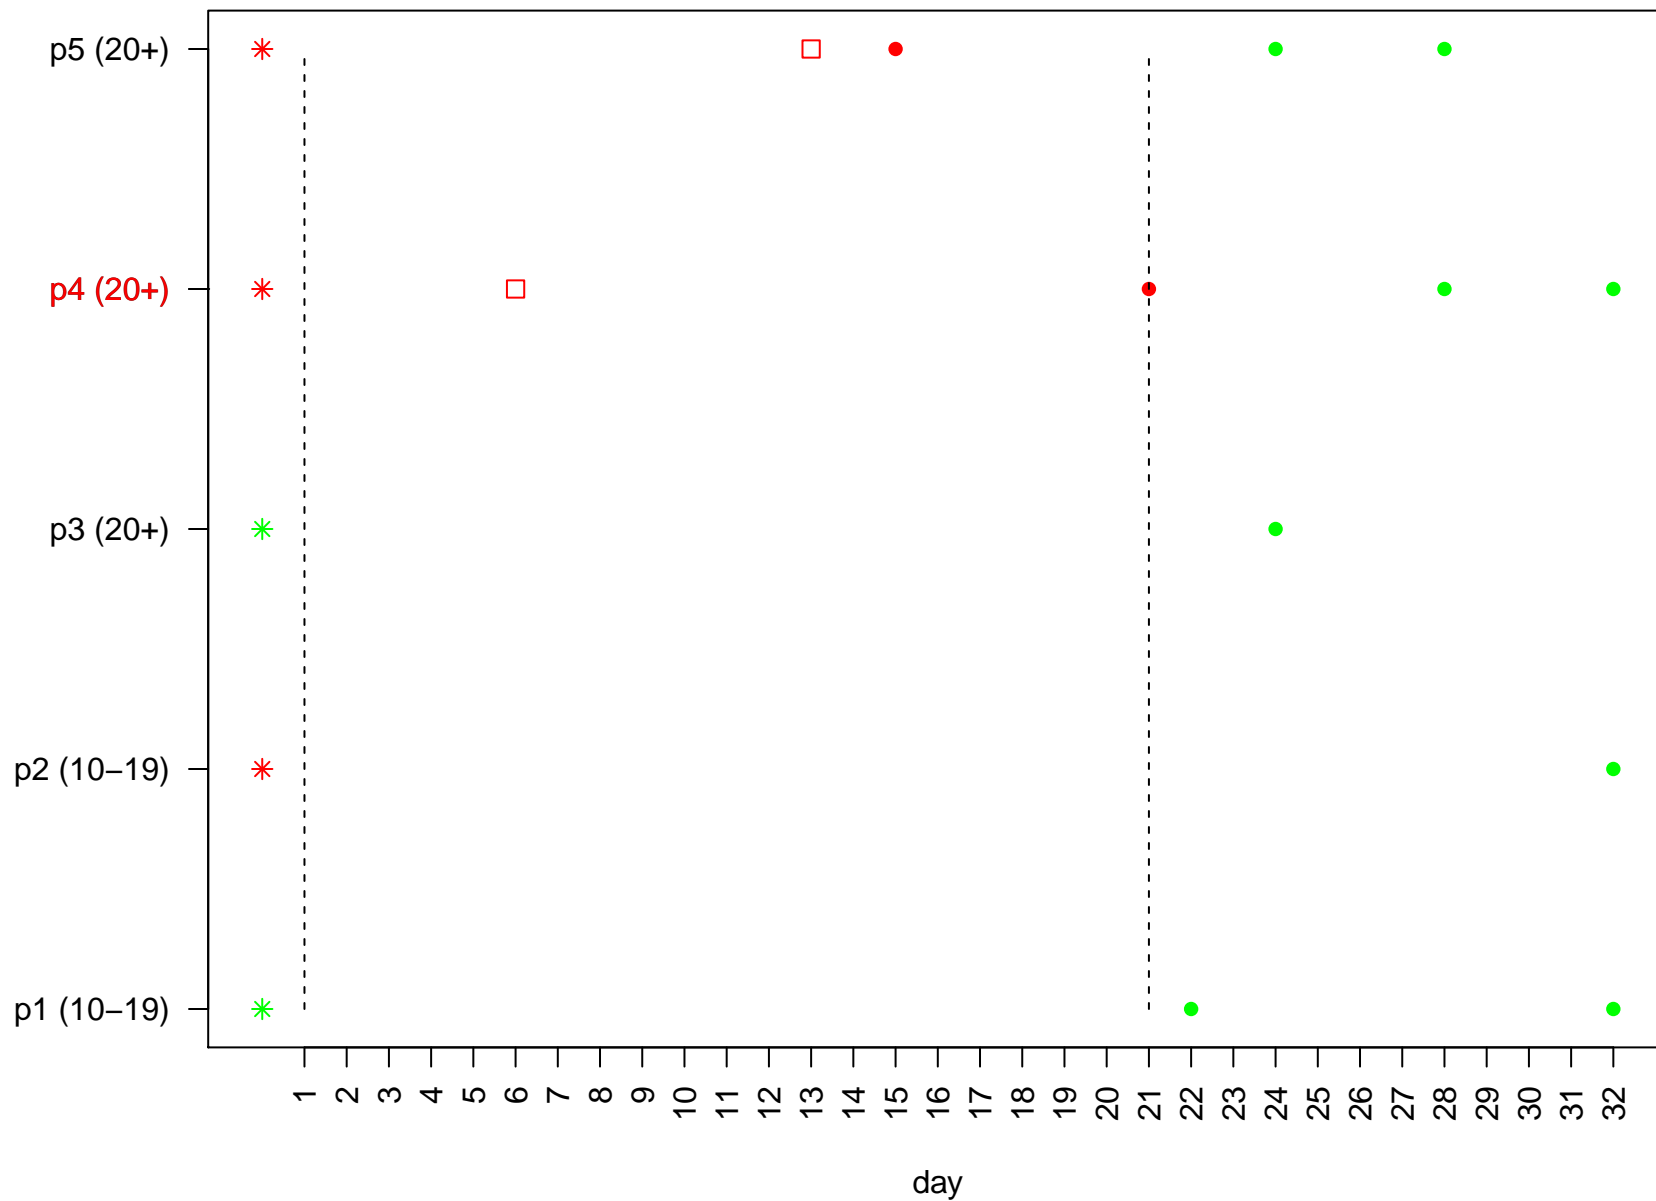

# Household 516

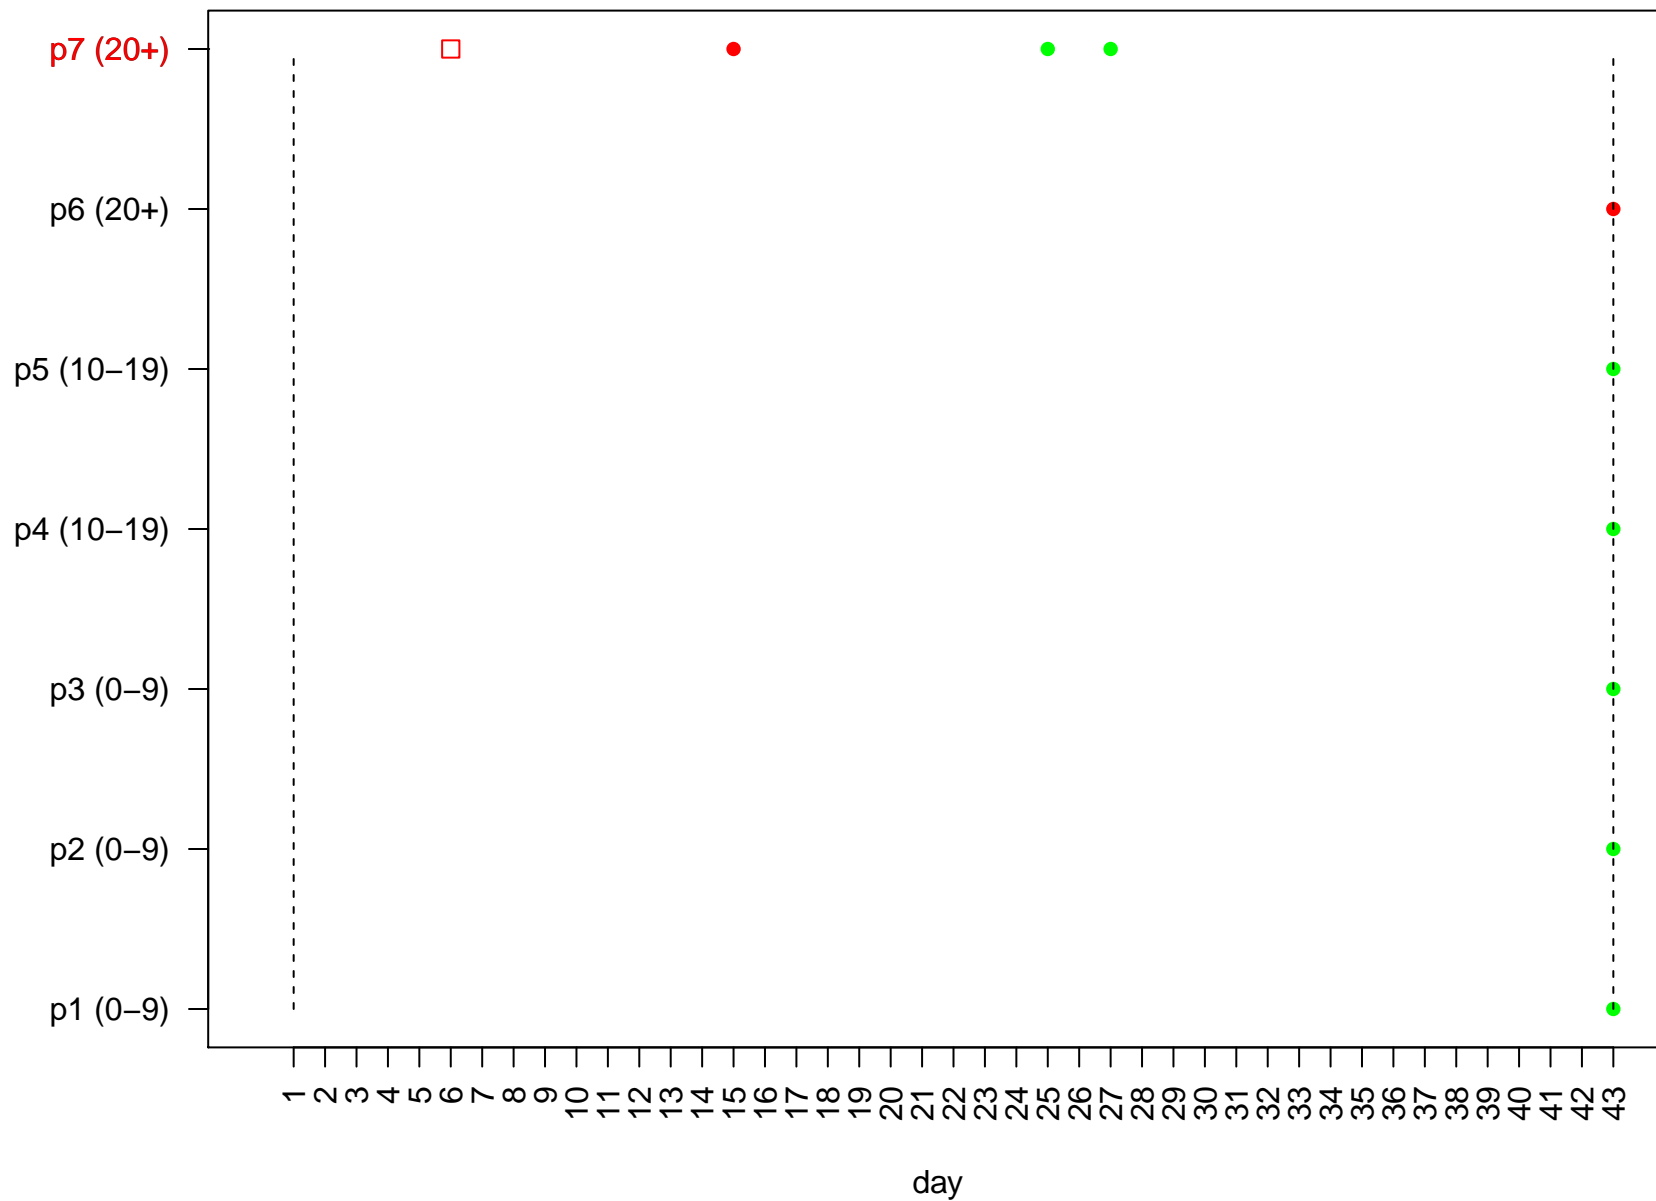

# Household 517

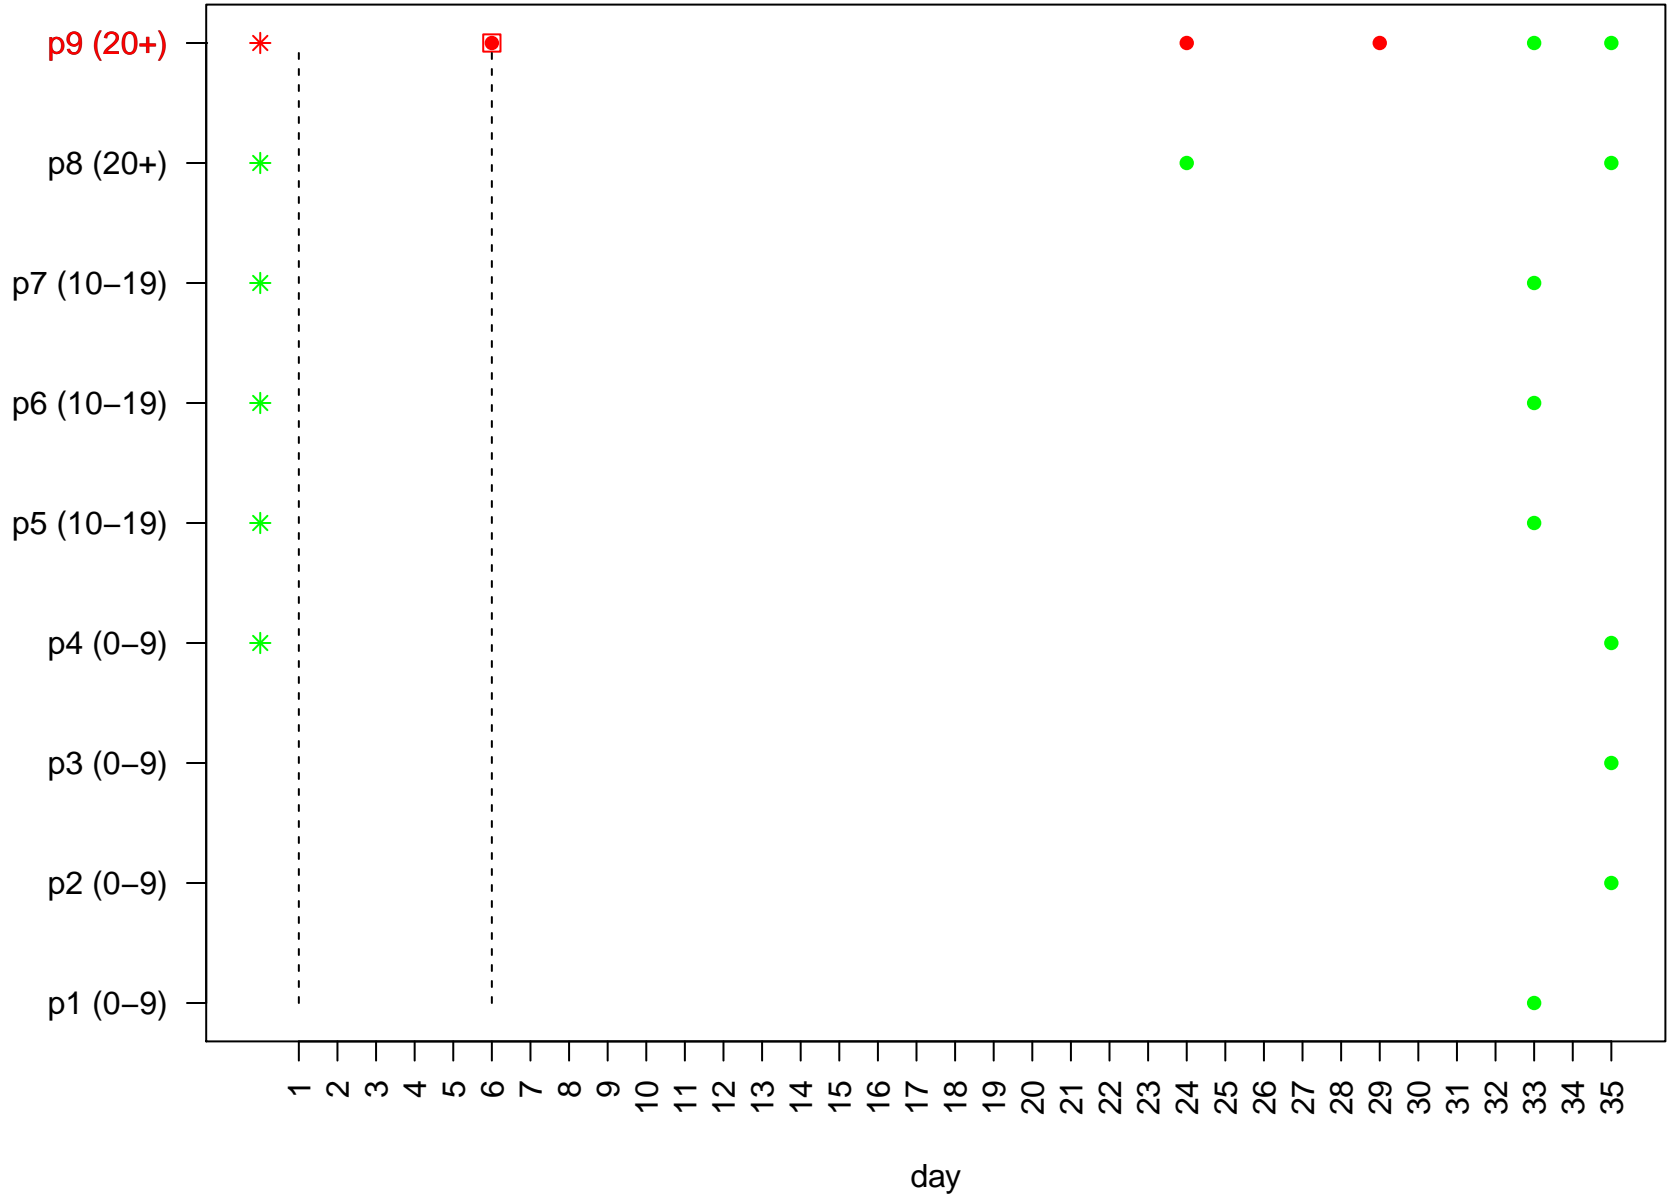

# Household 518

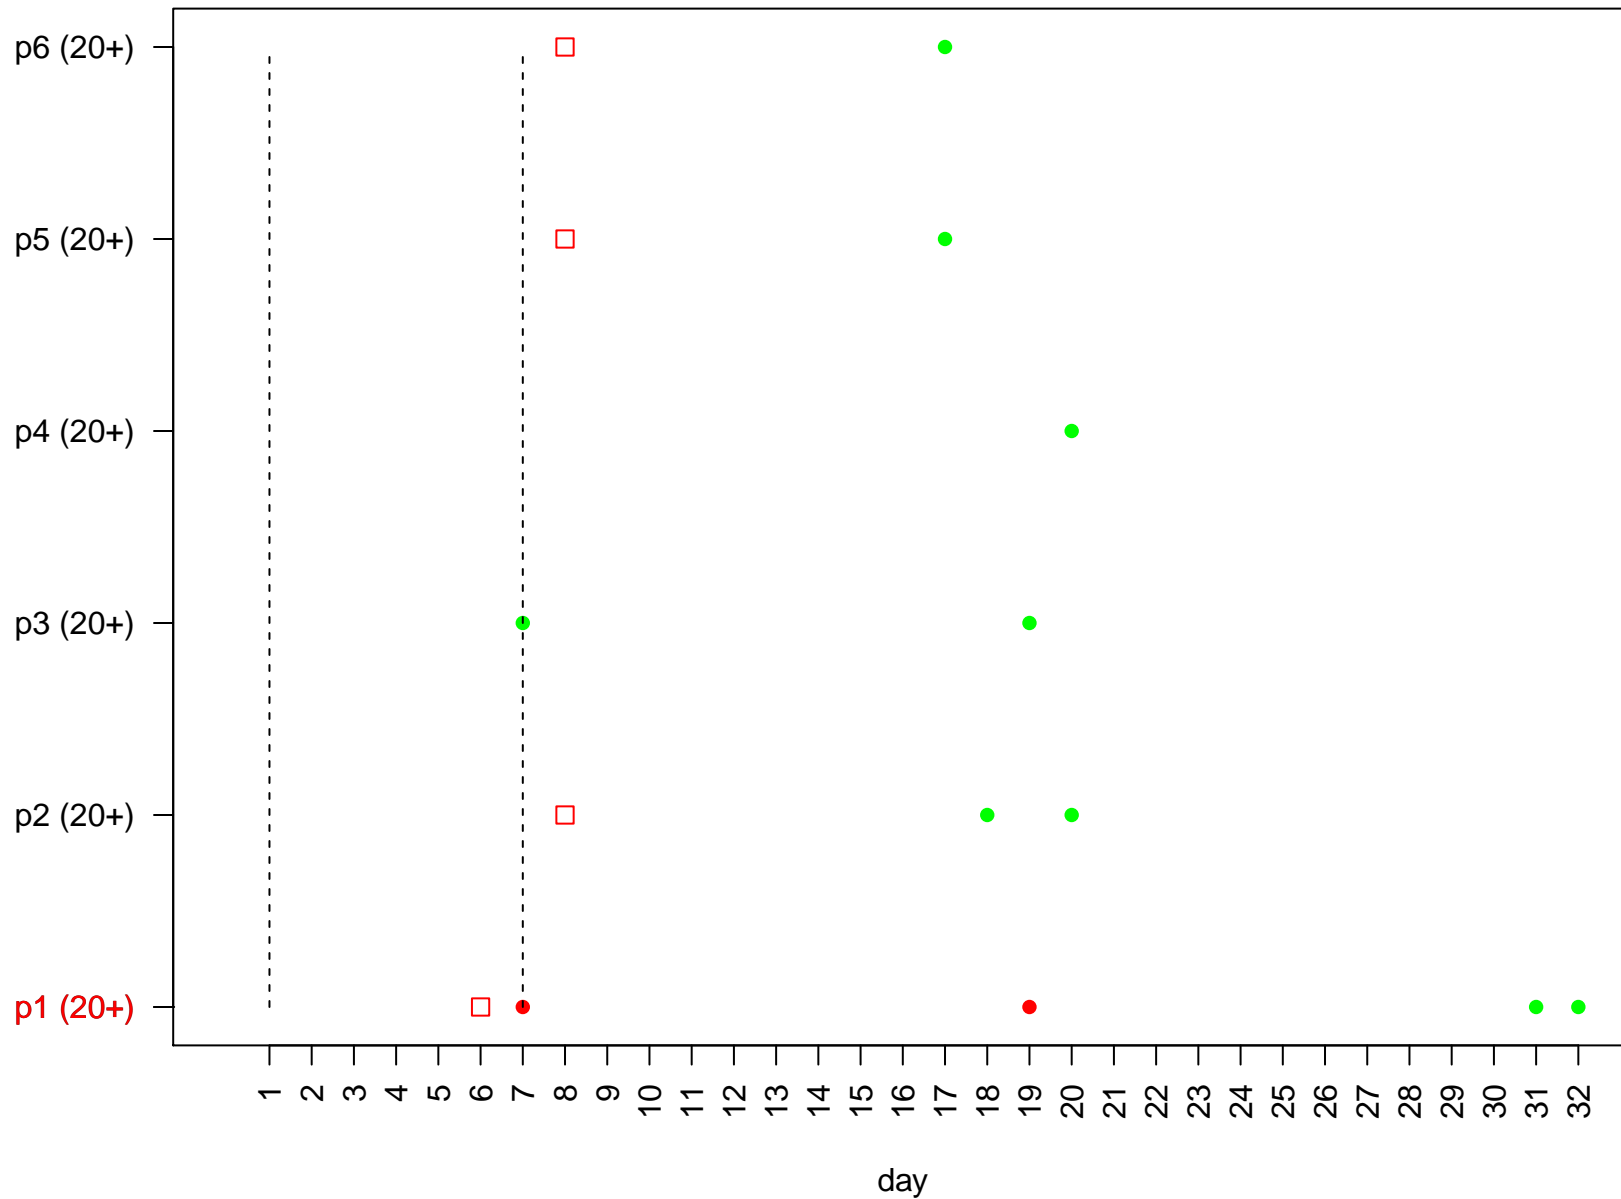

# Household 519

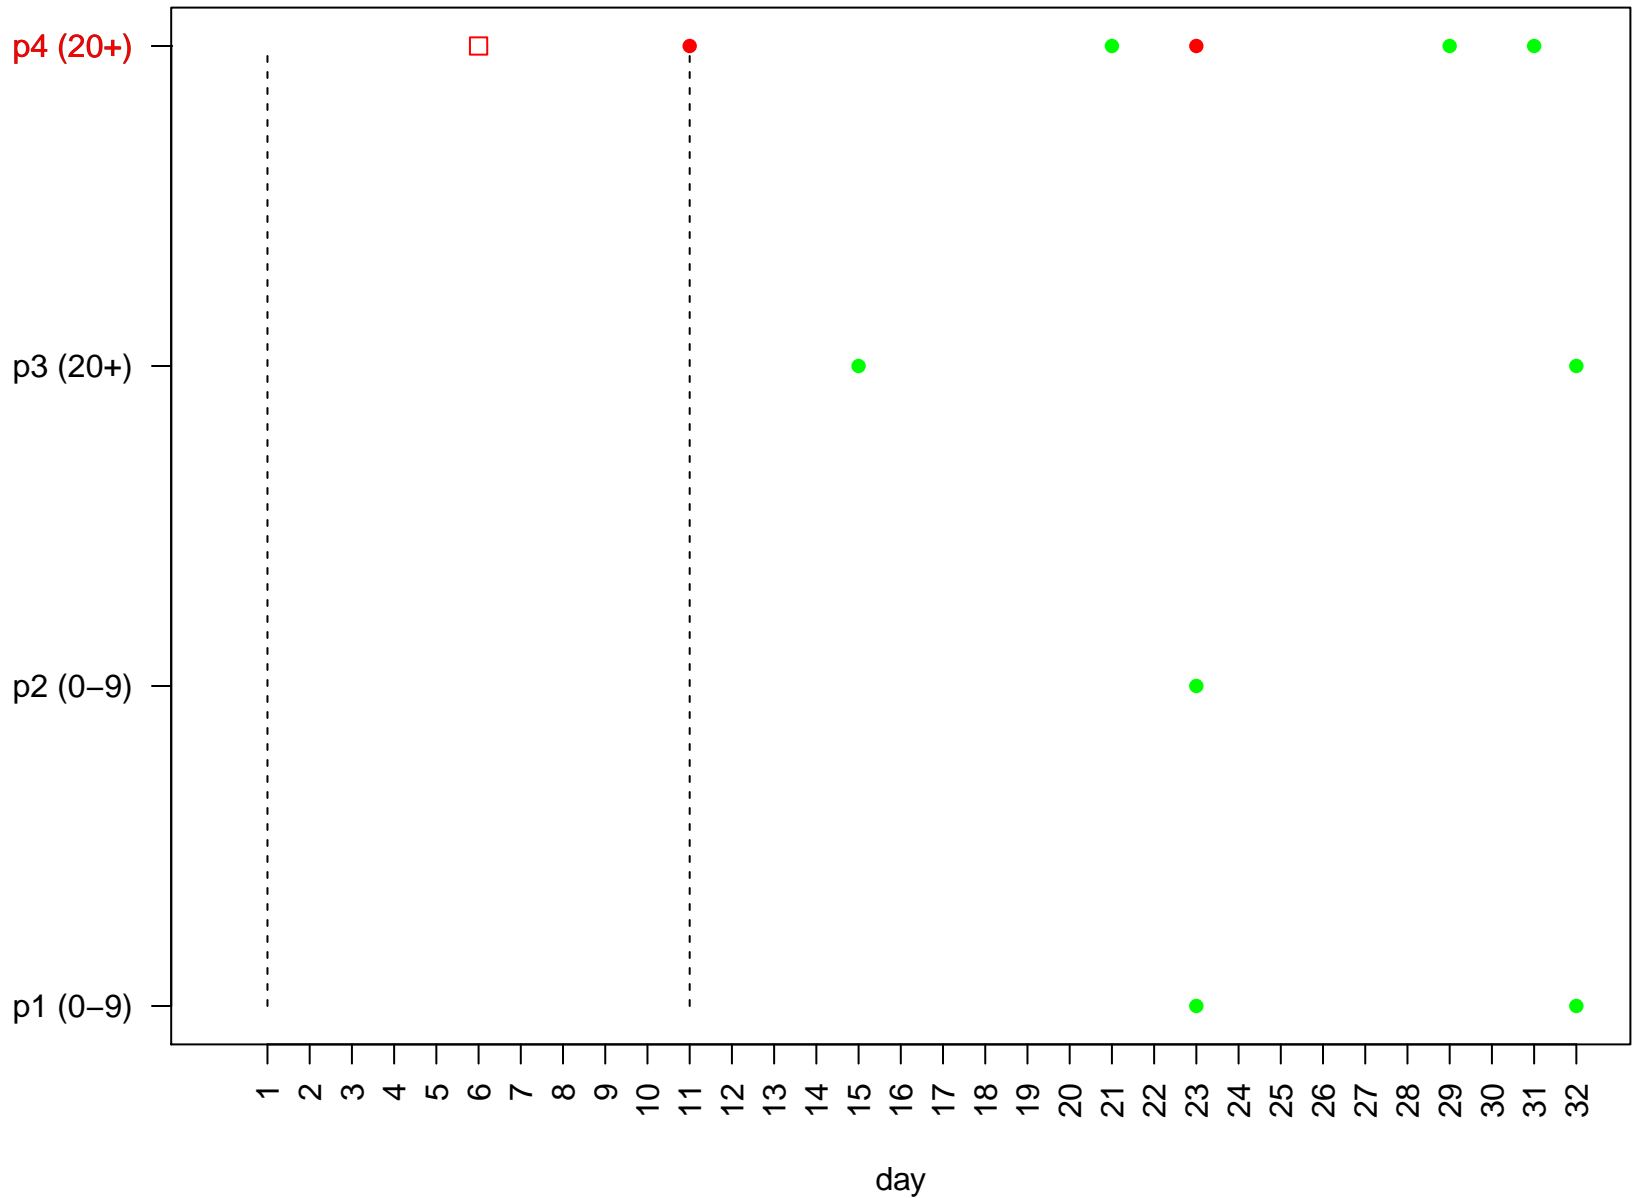



# Household 520

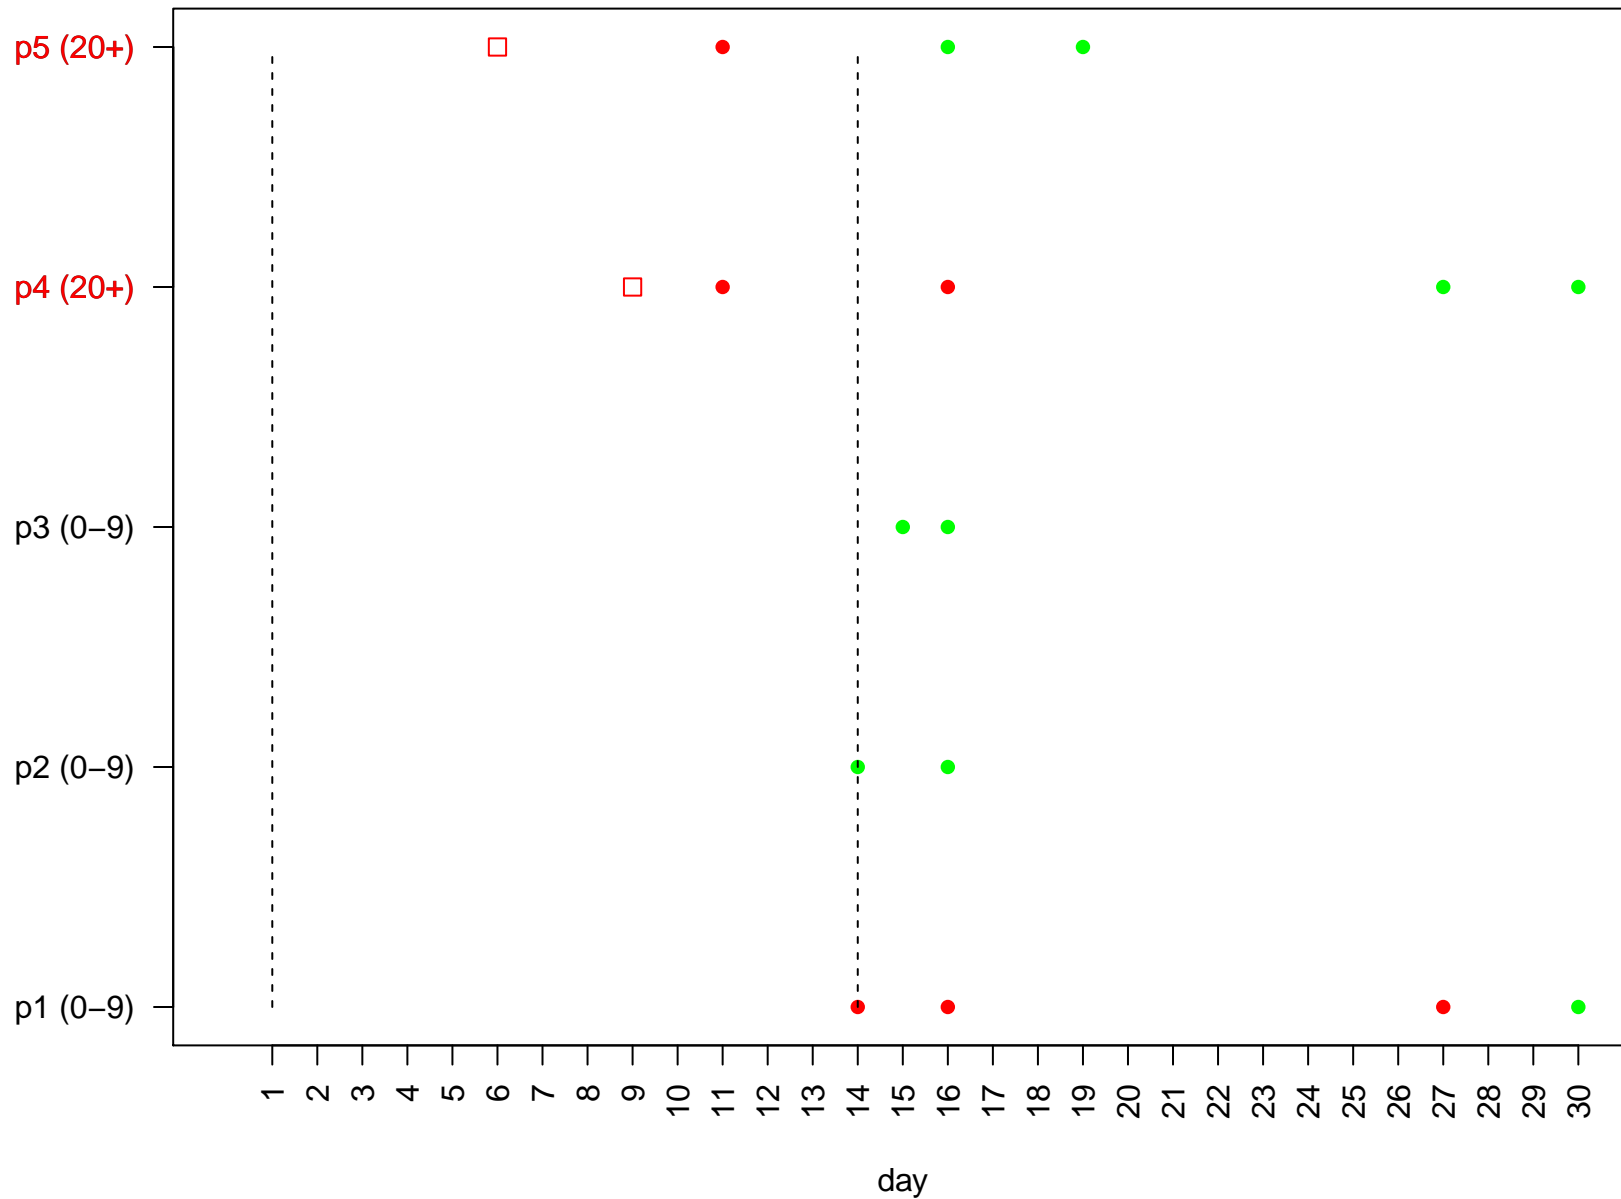

# Household 521

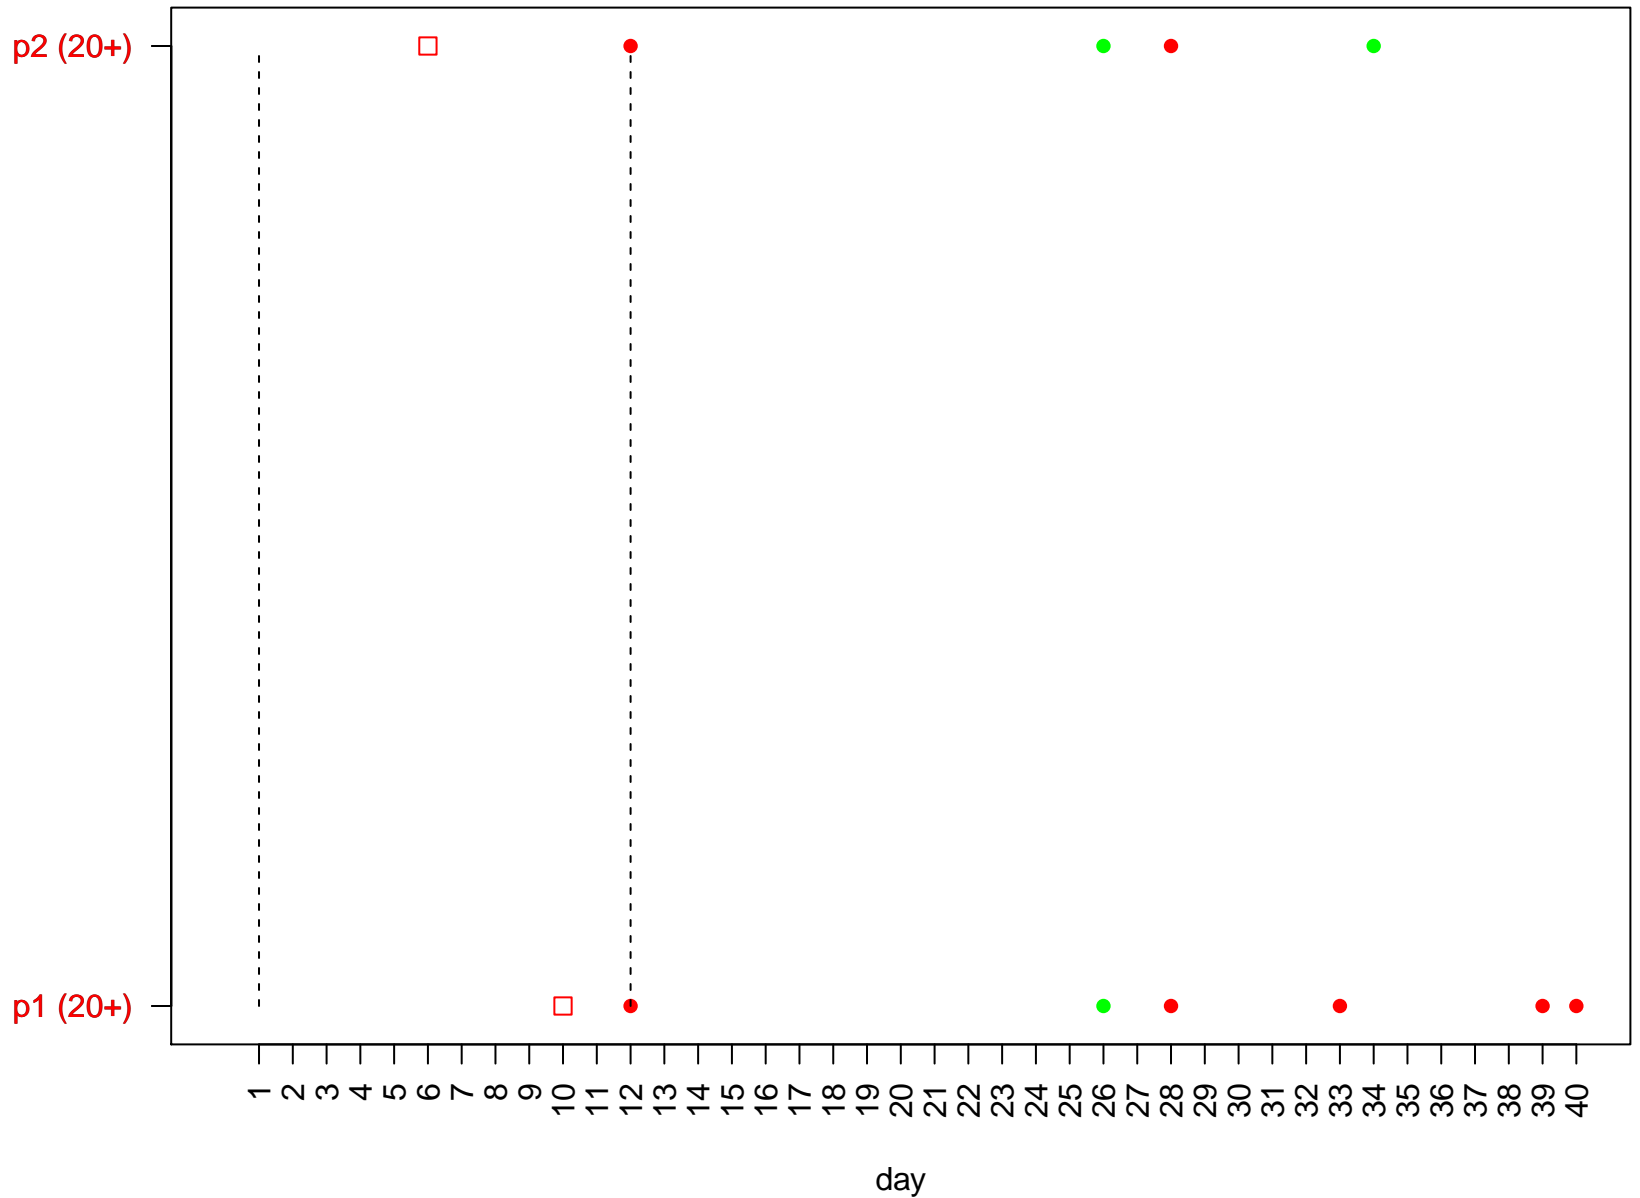

# Household 522

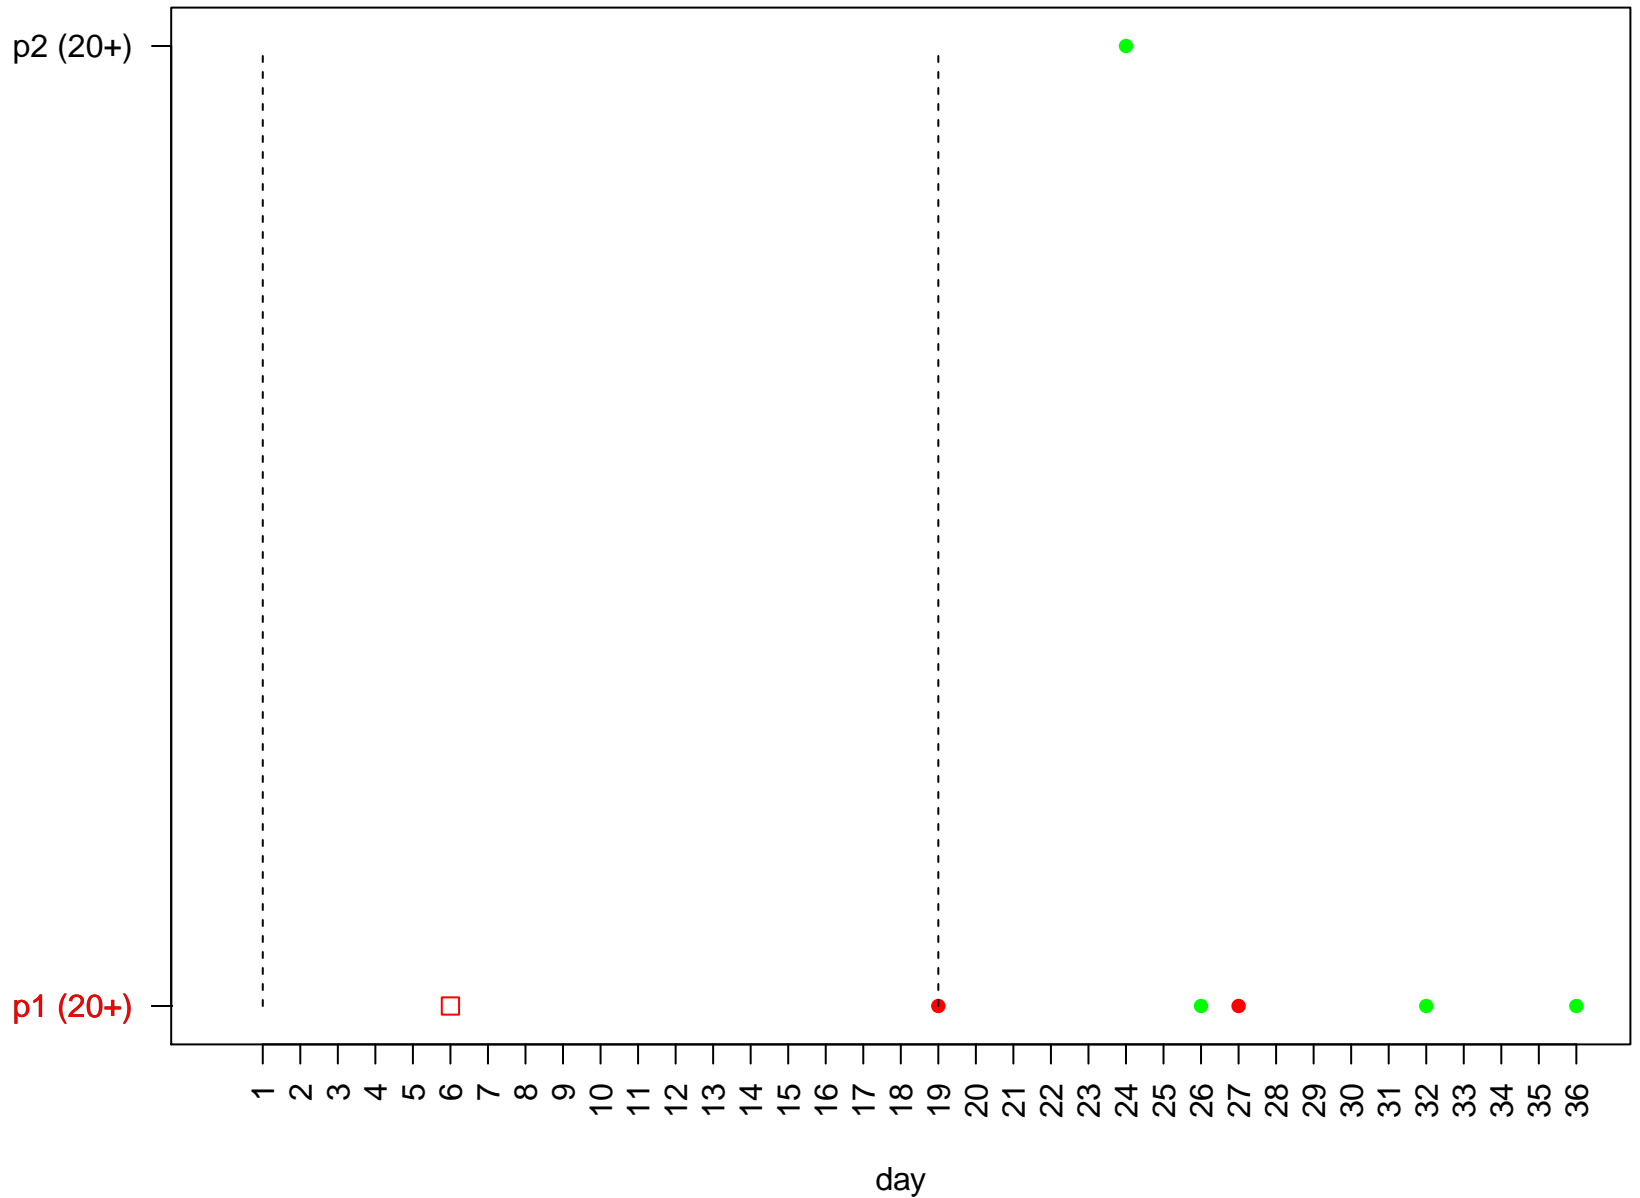

# Household 523

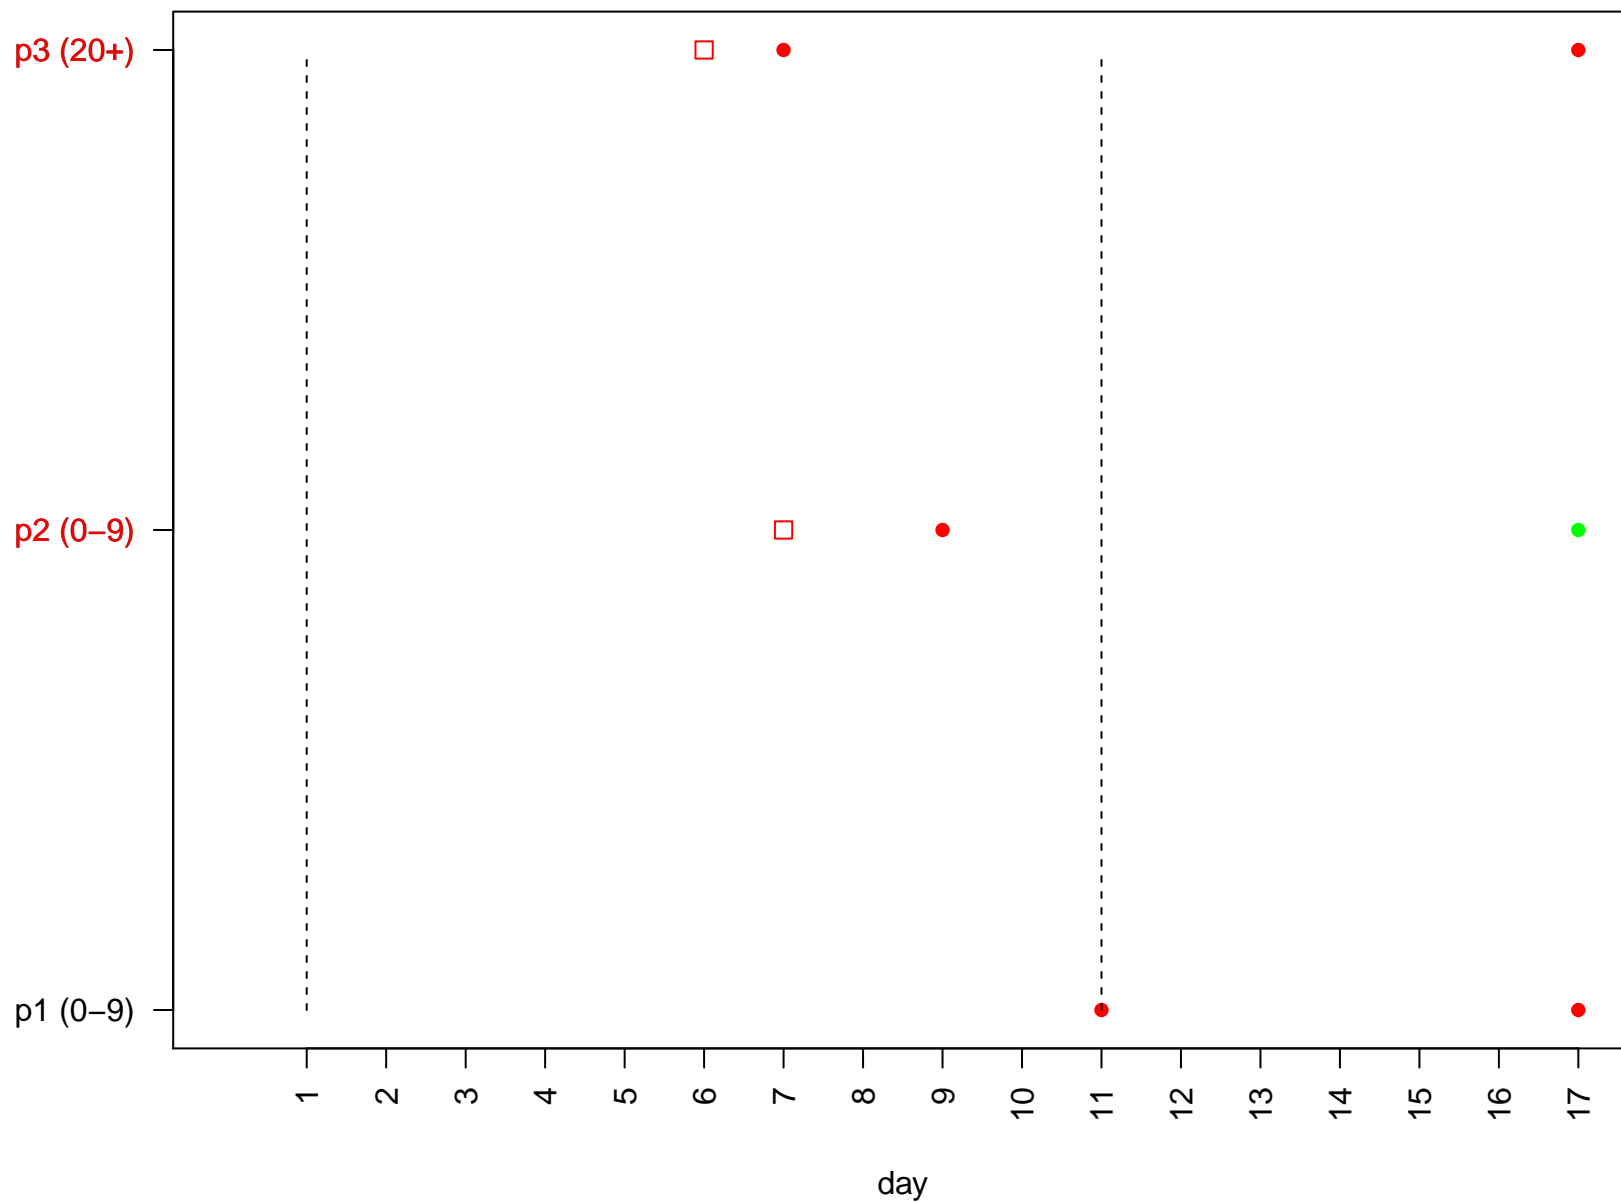

# Household 524

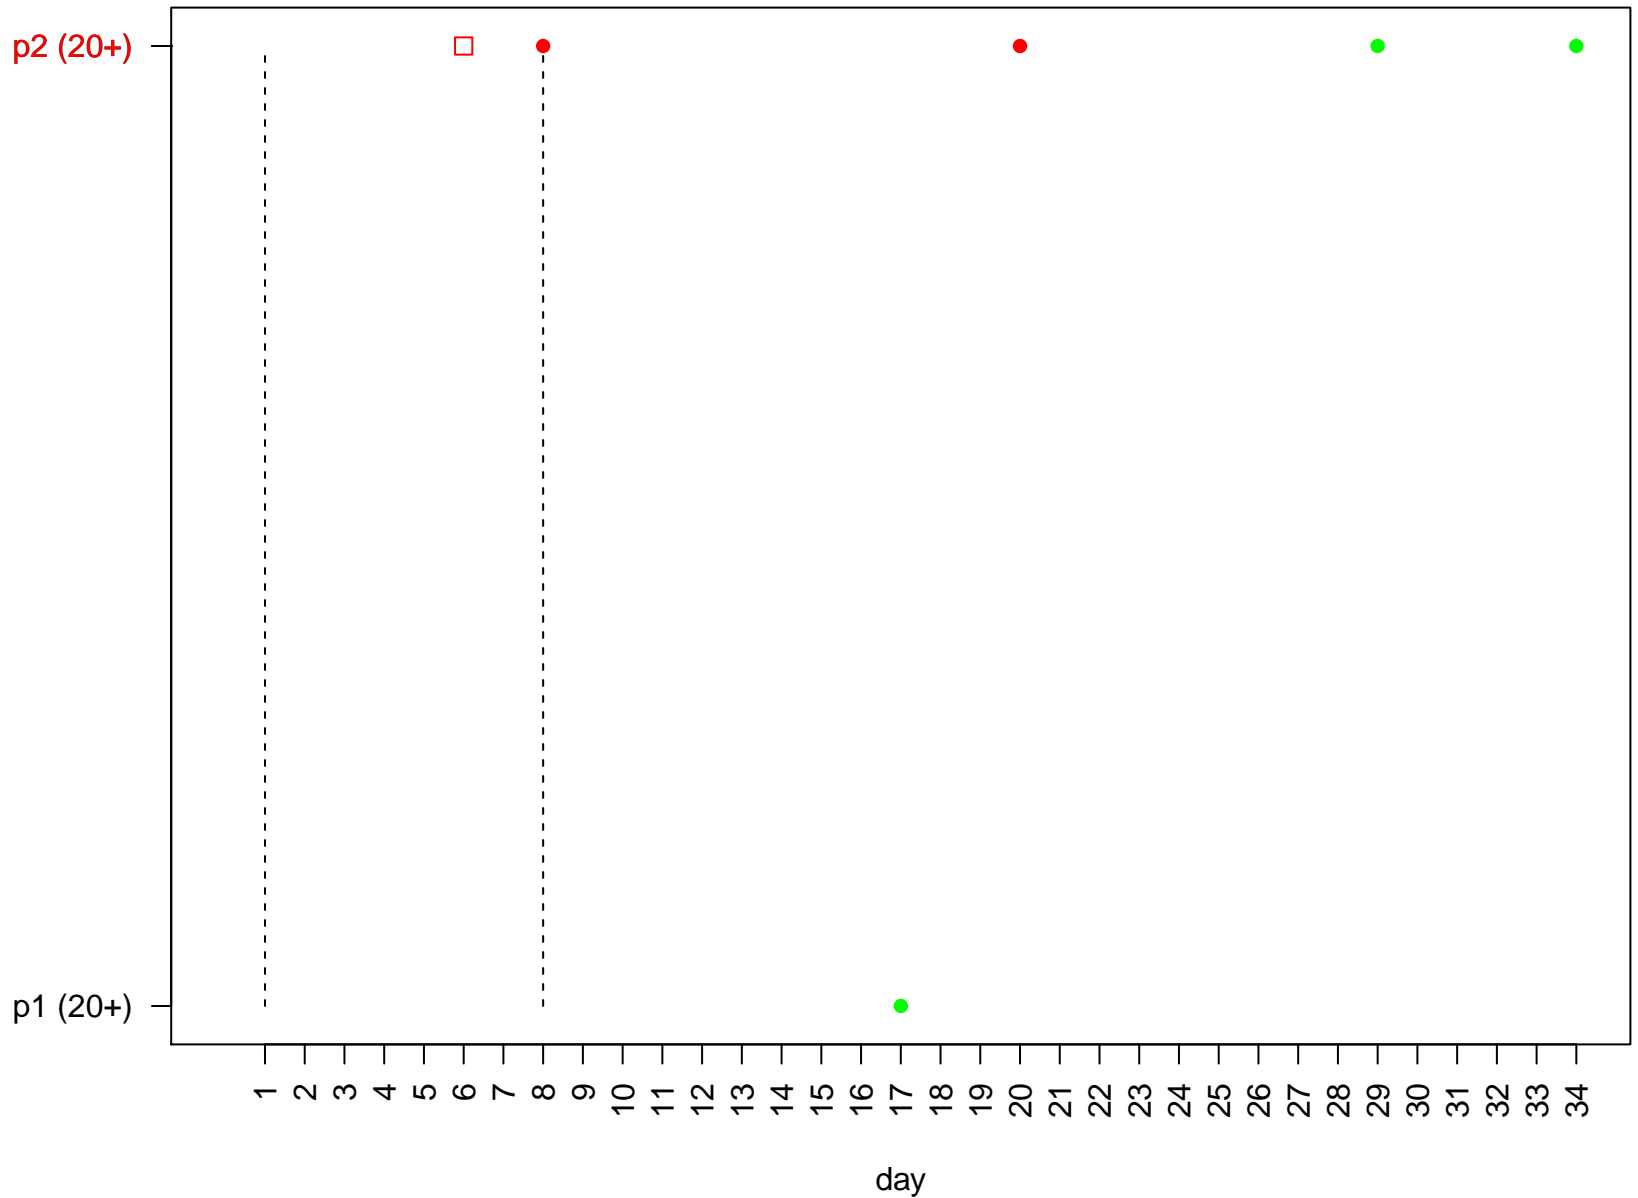

# Household 525

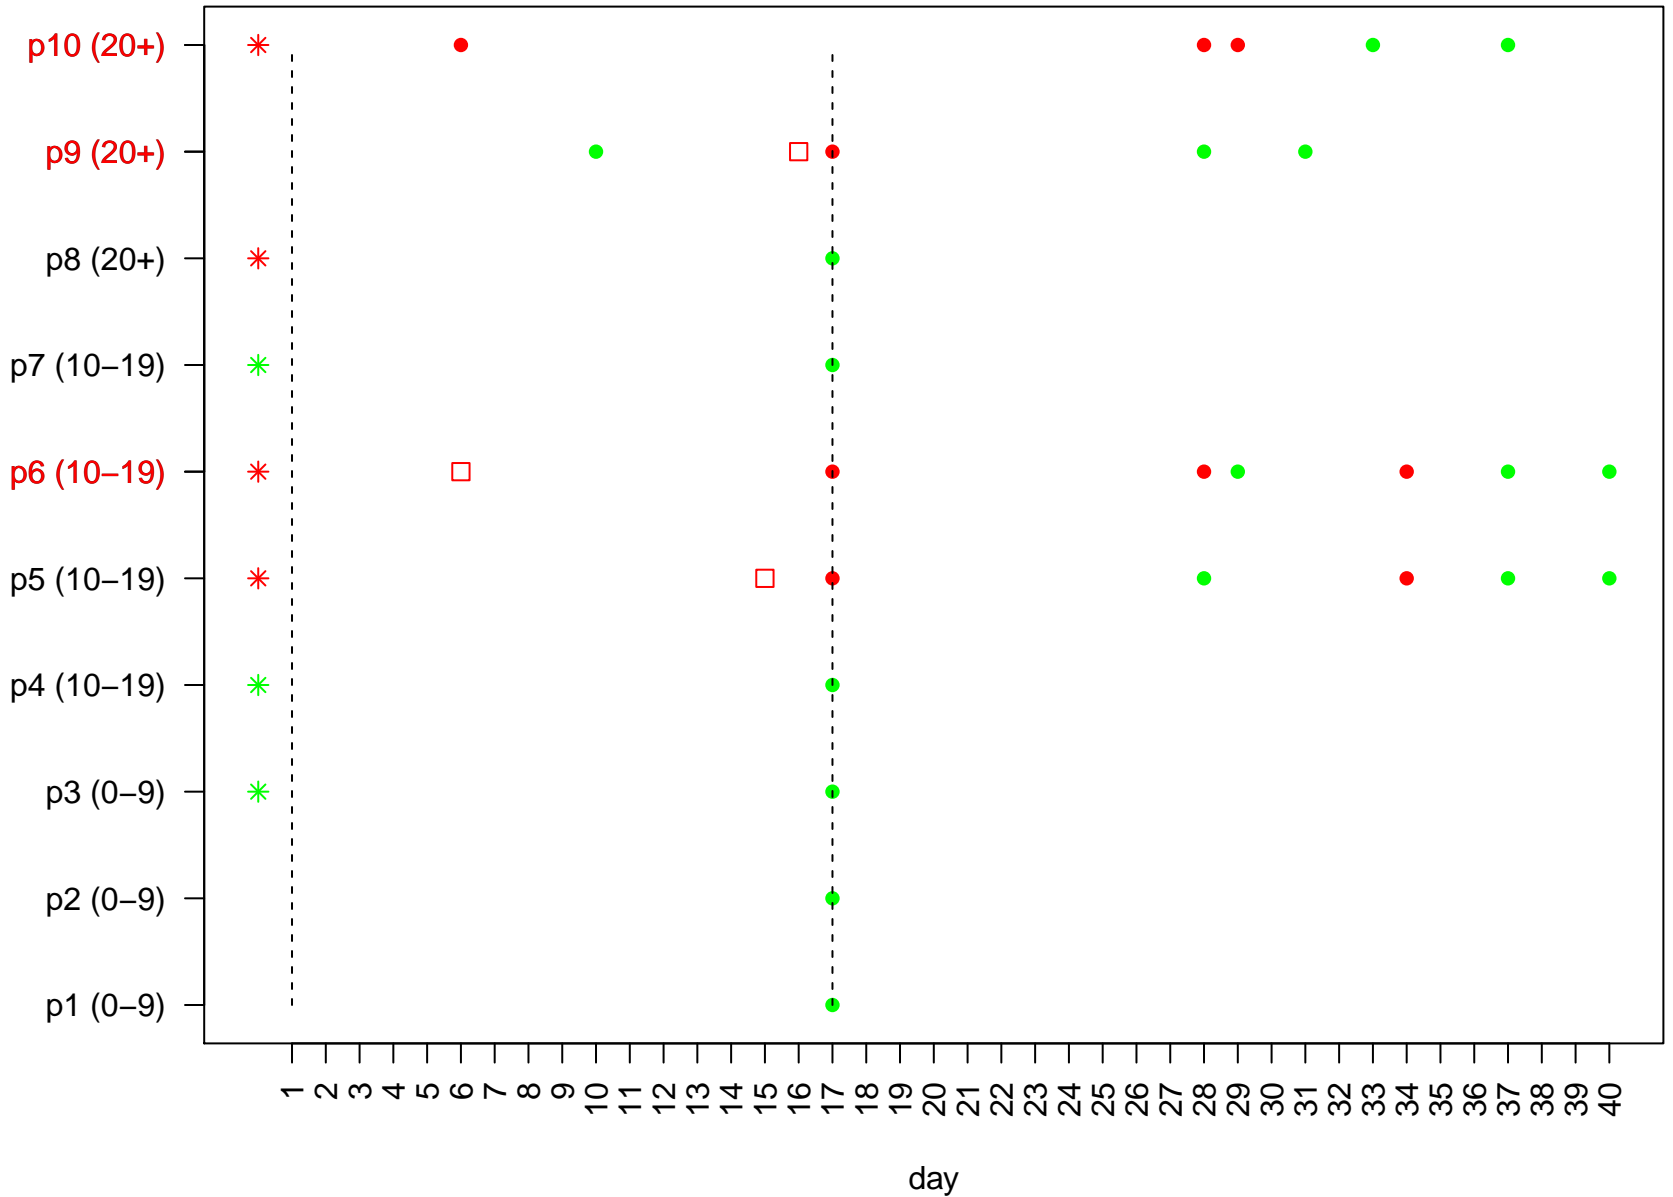

# Household 526

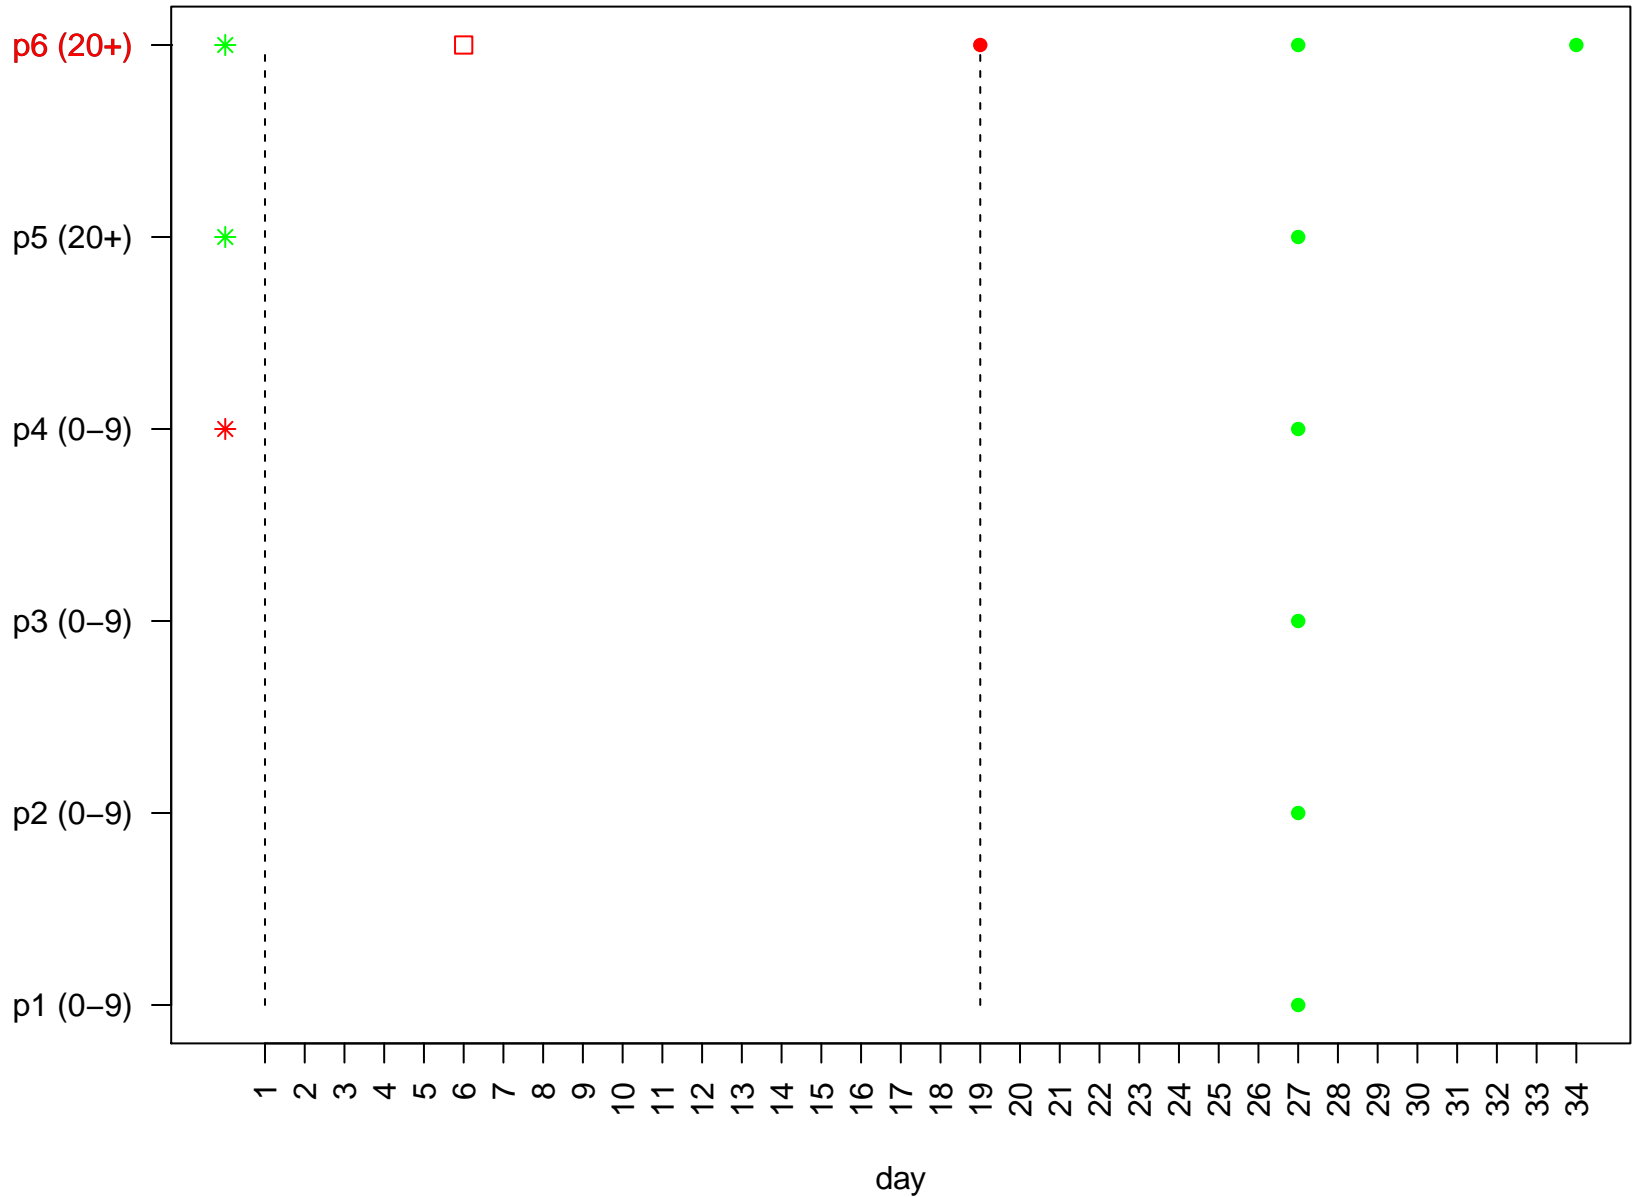

# Household 527

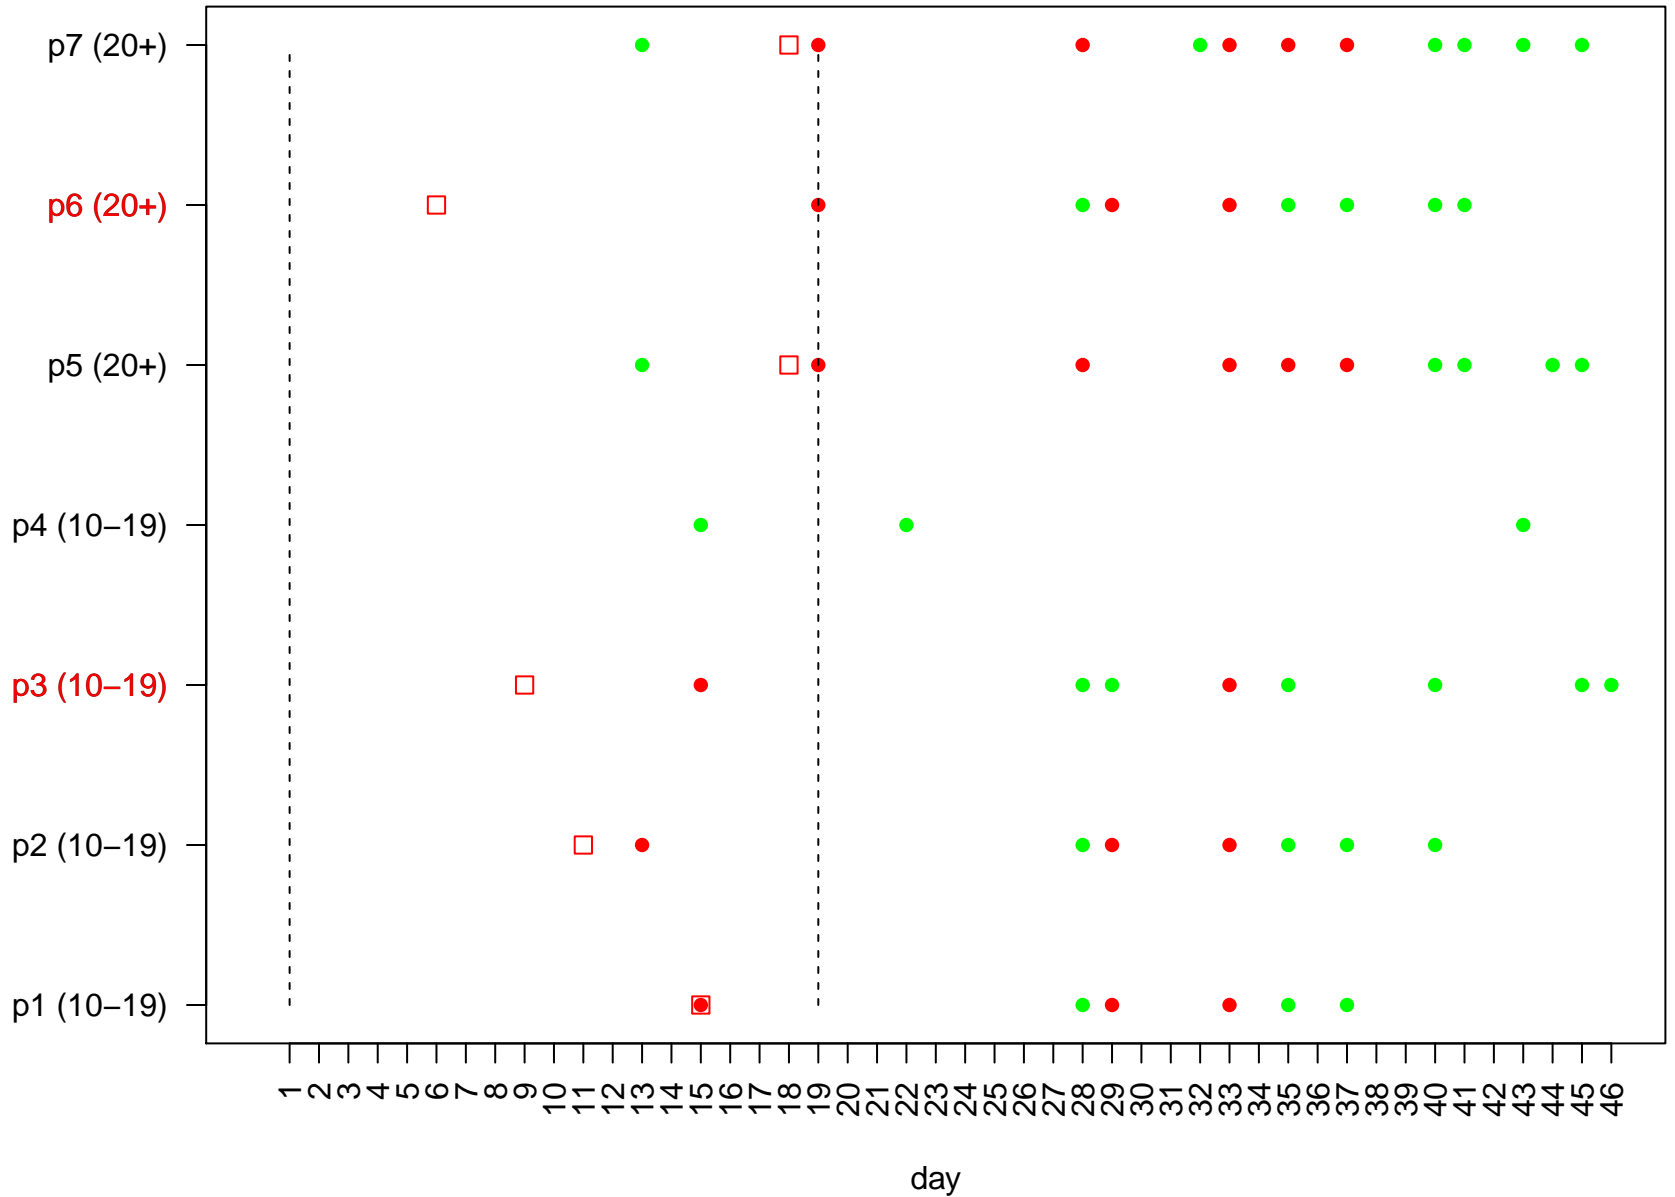





# Household 529

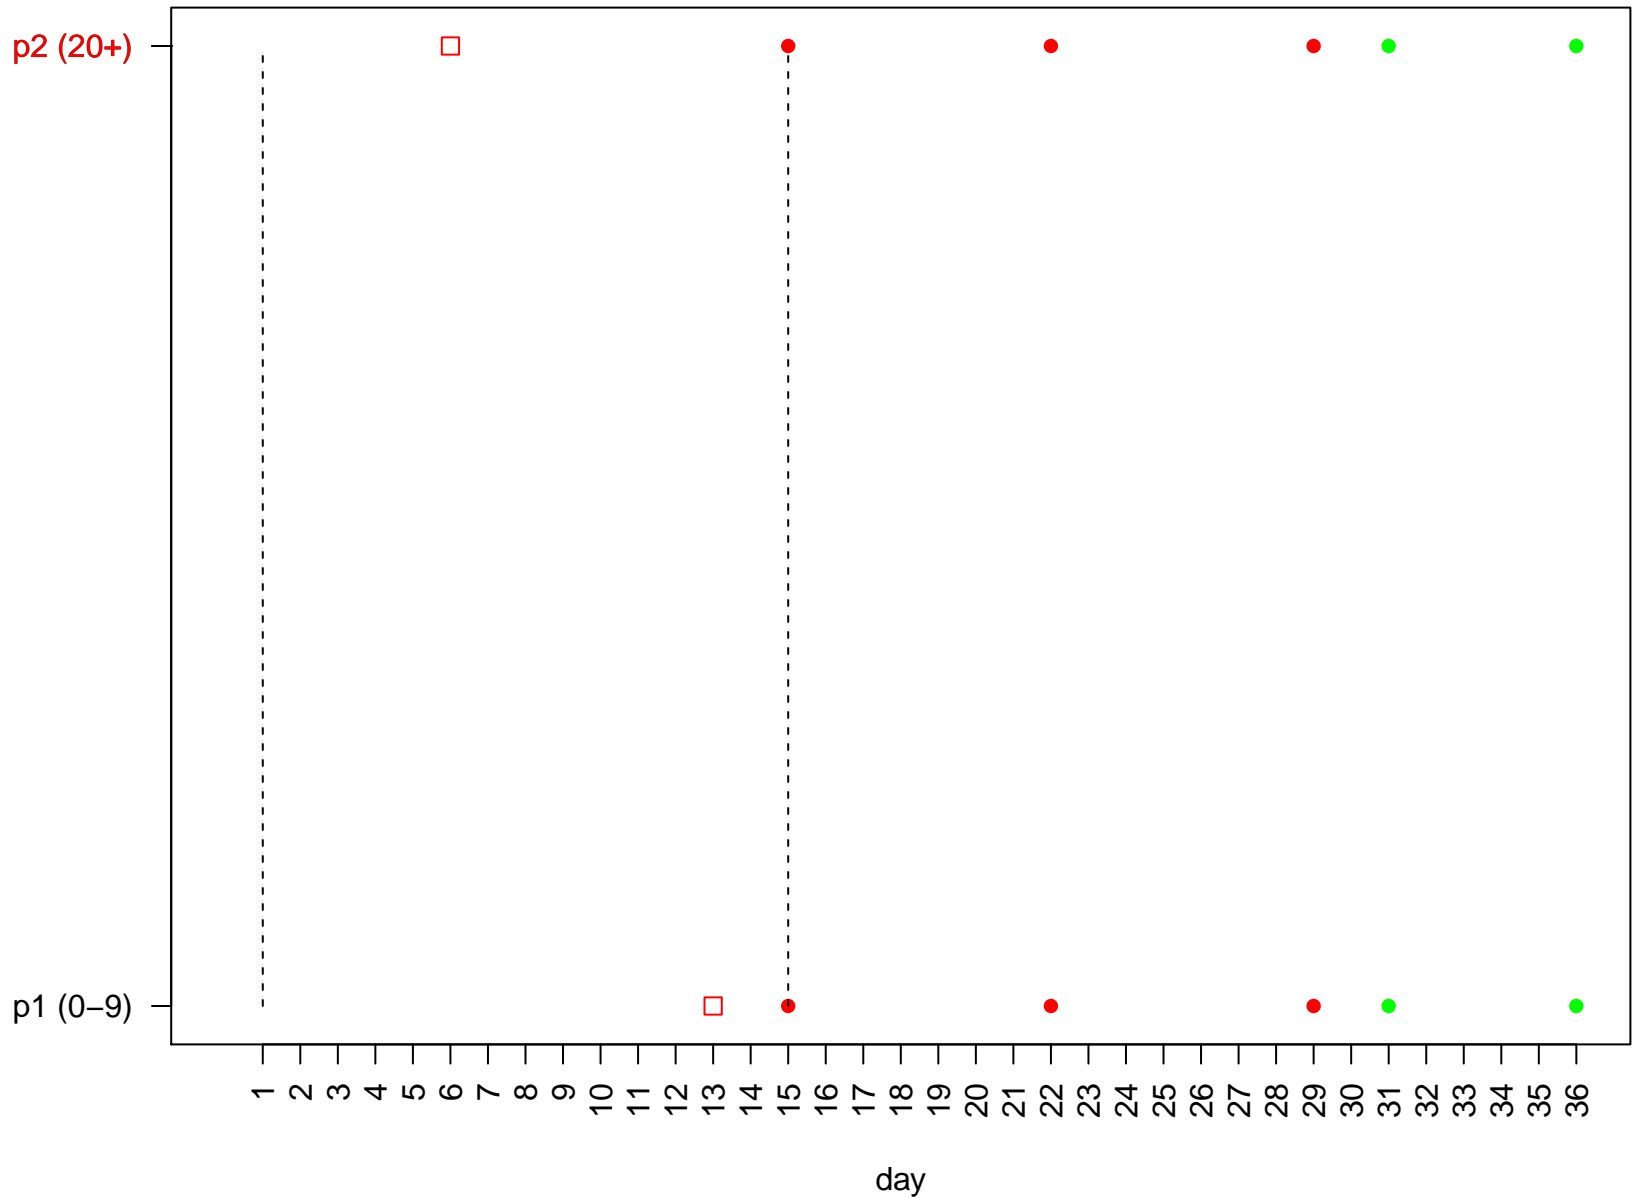

# Household 530

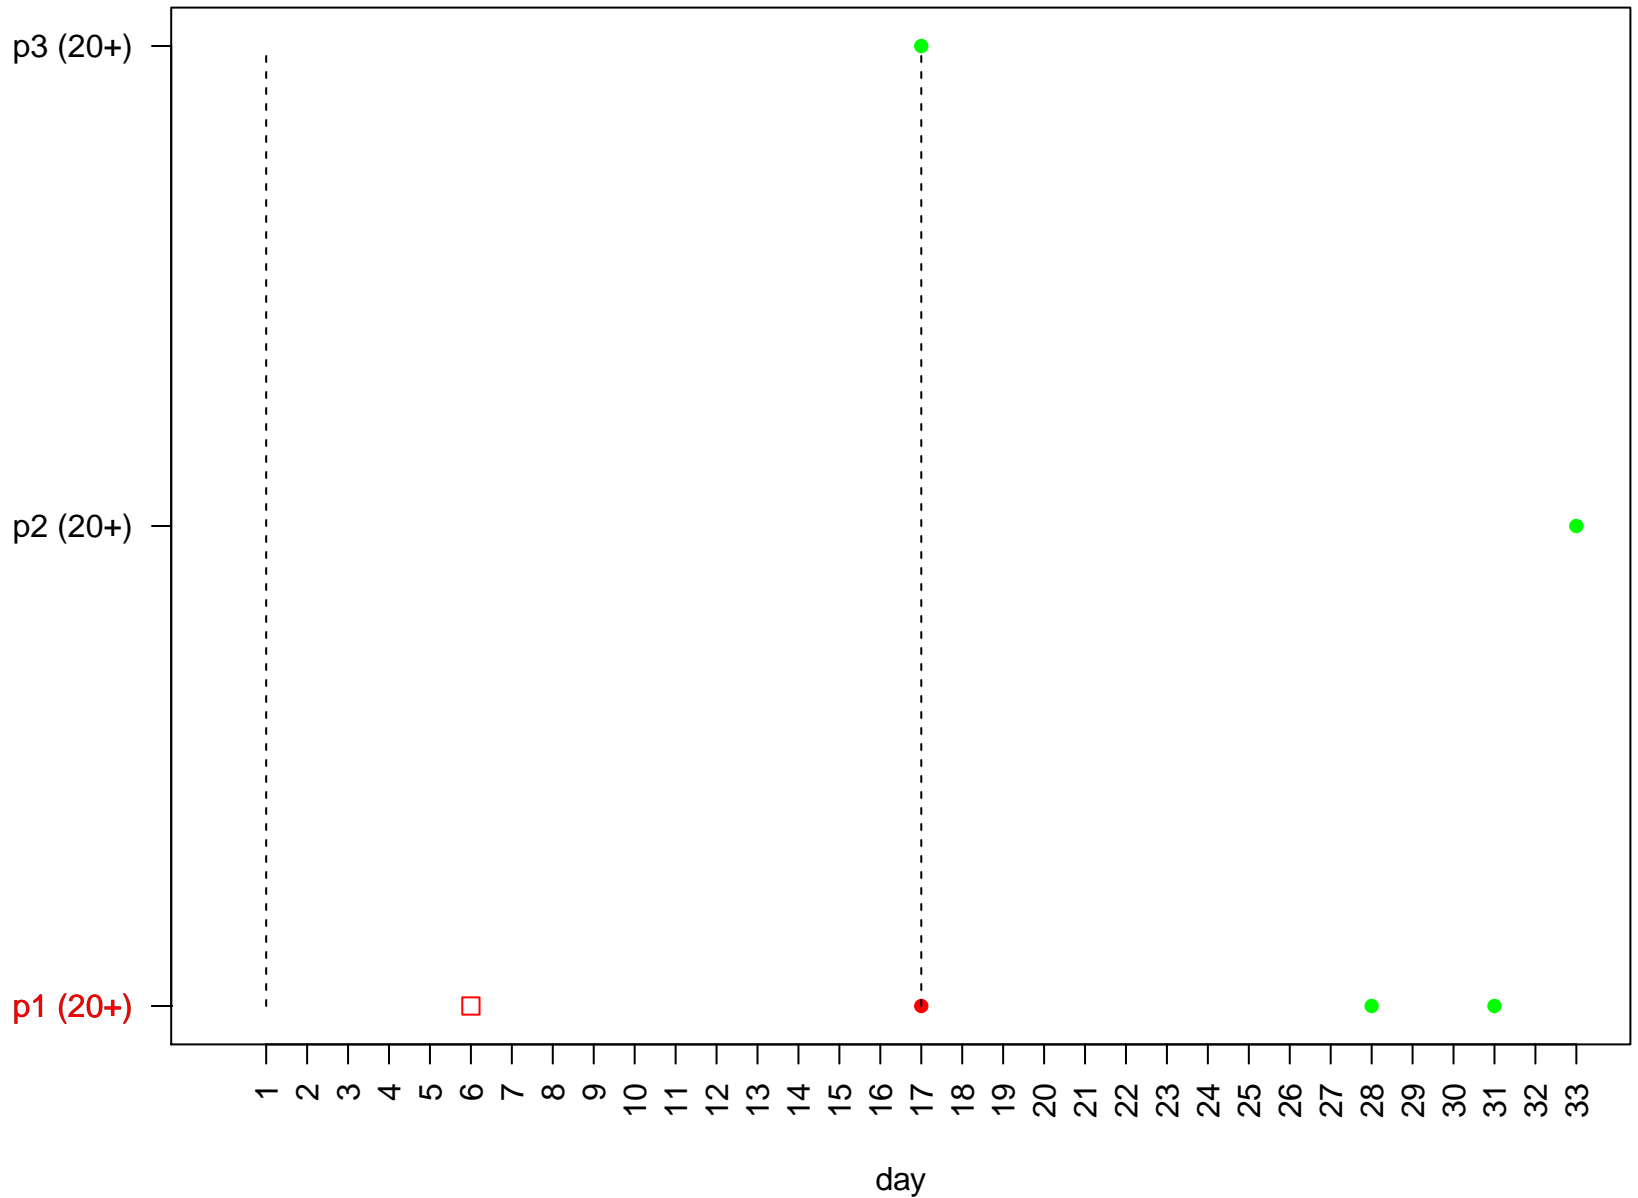

# Household 531

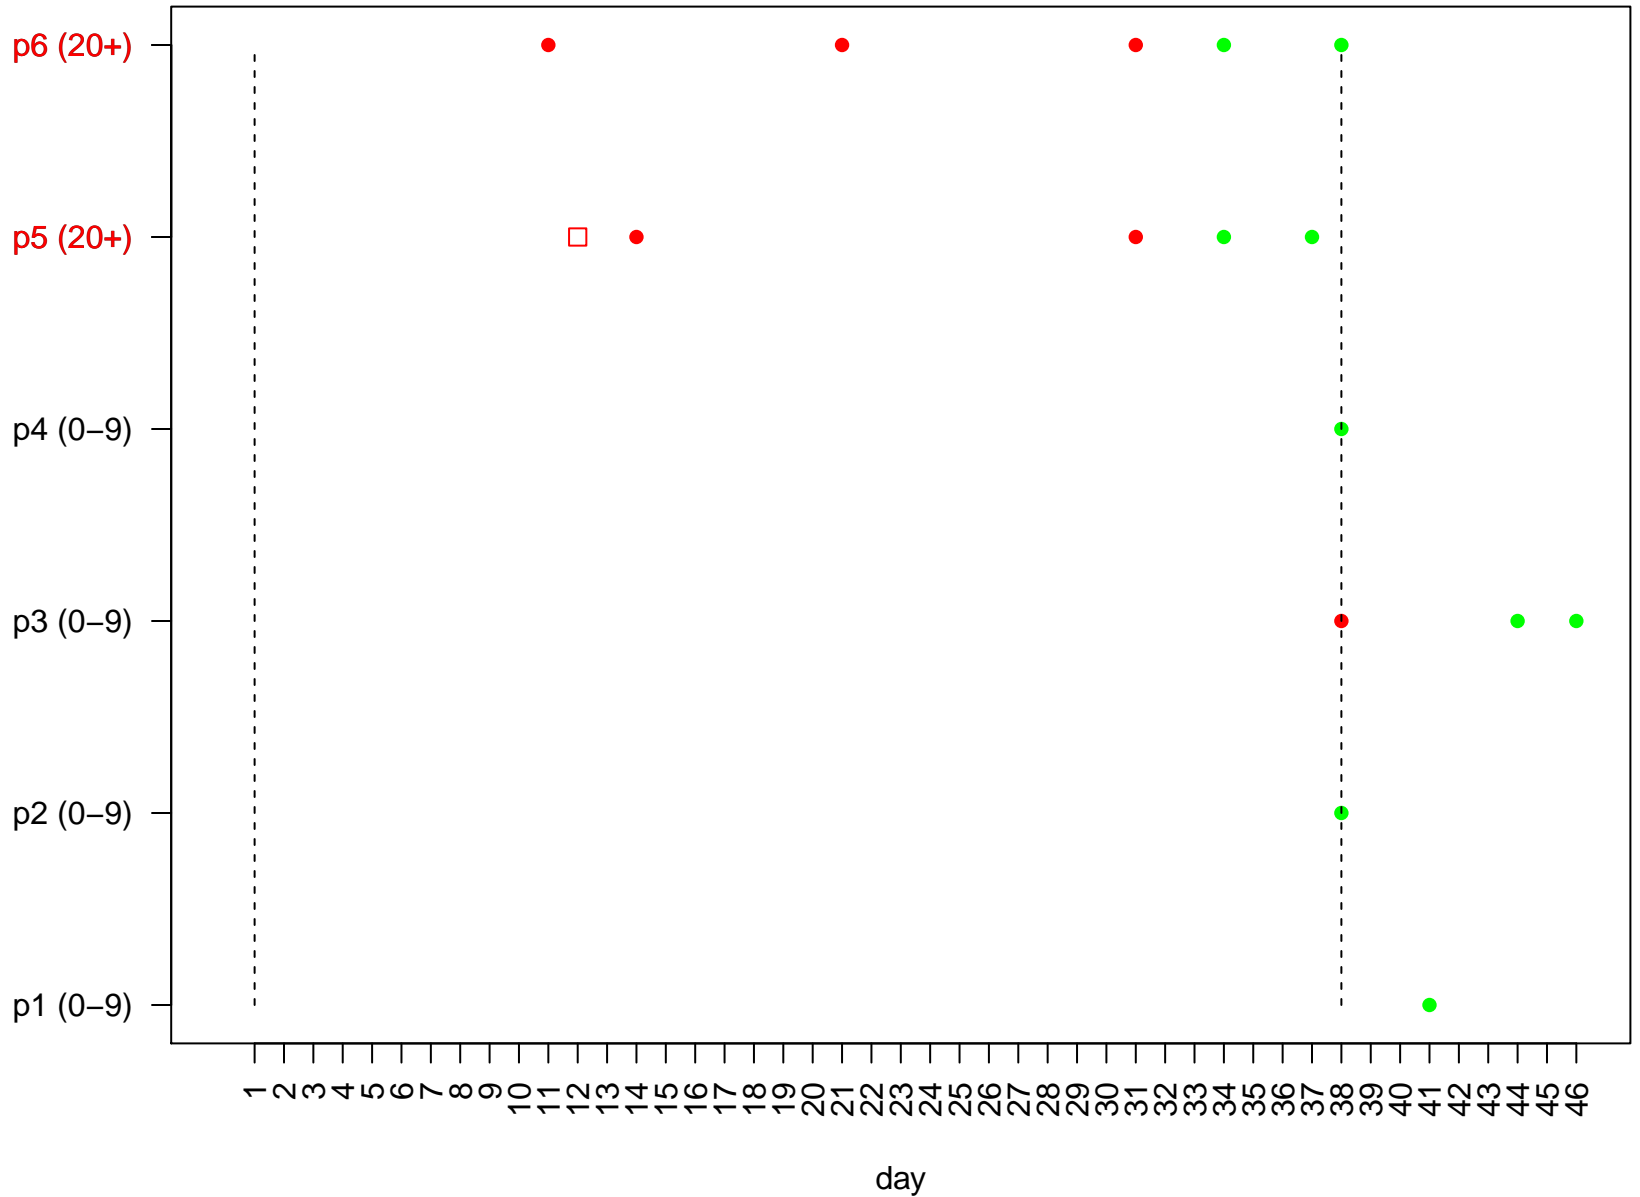

# Household 532

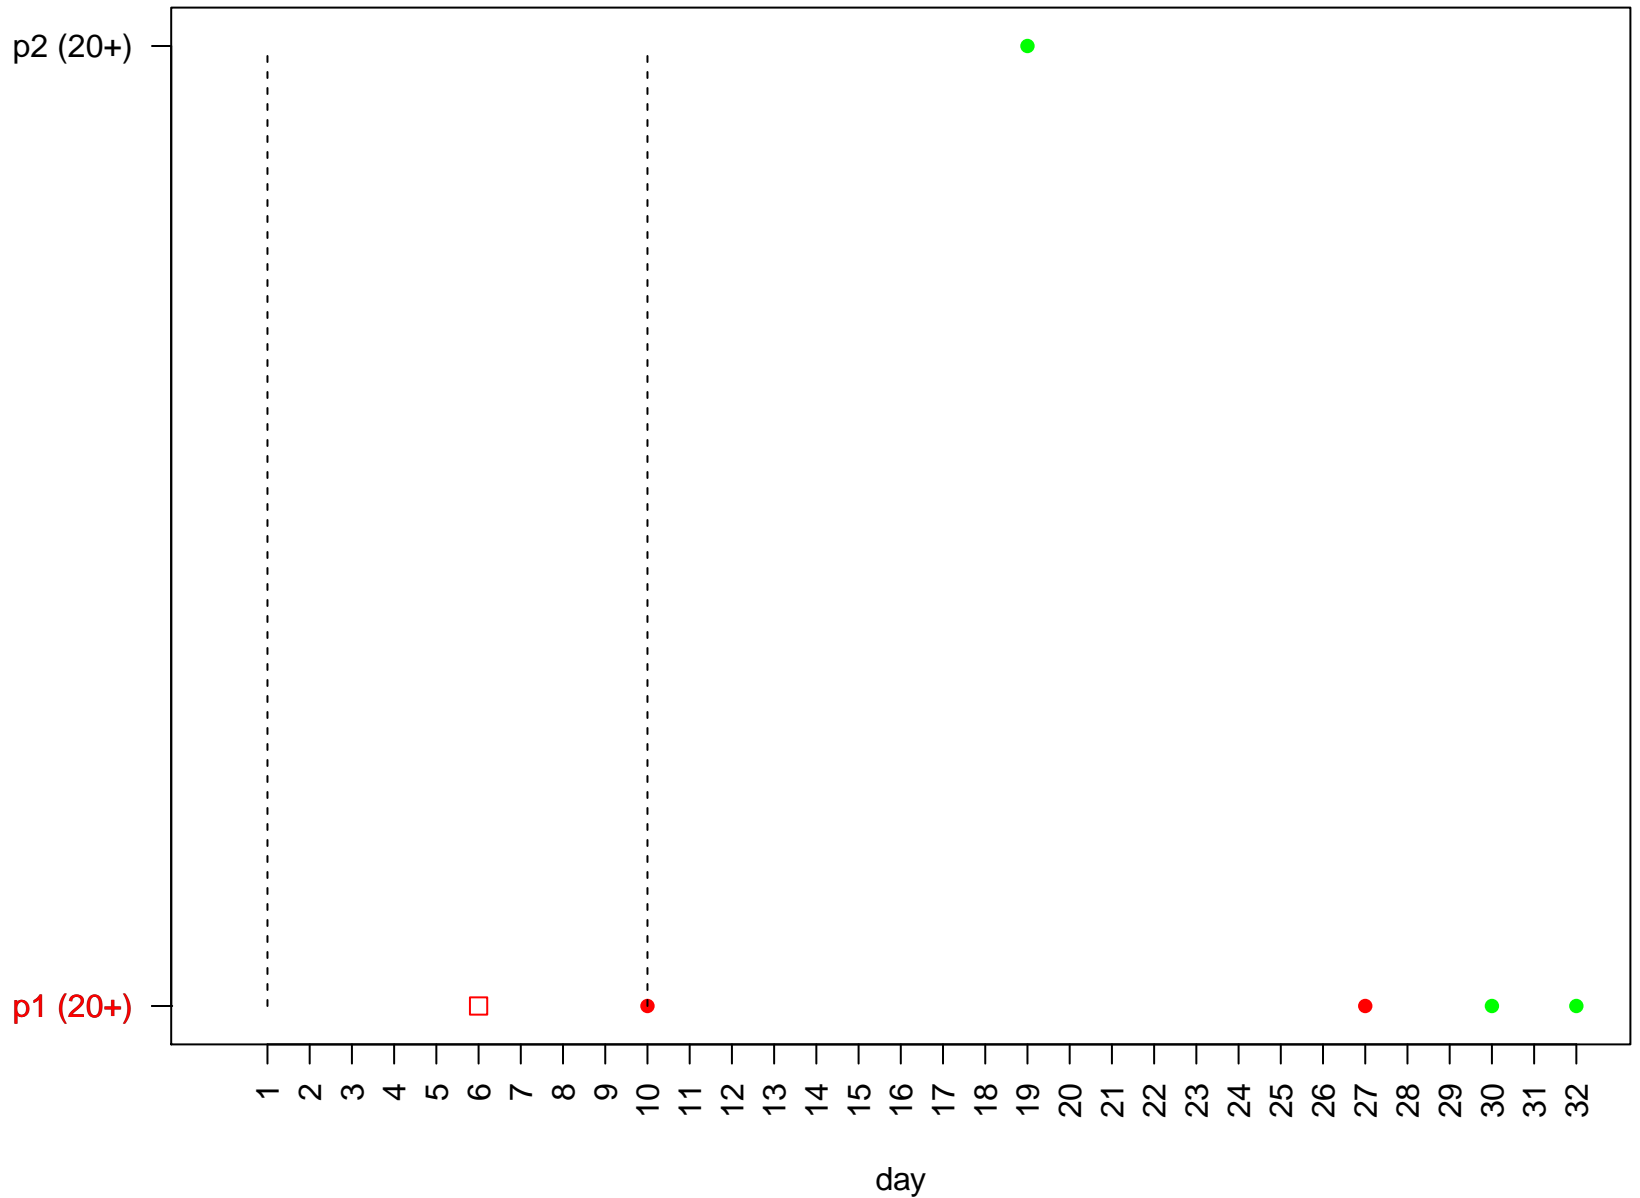

# Household 534

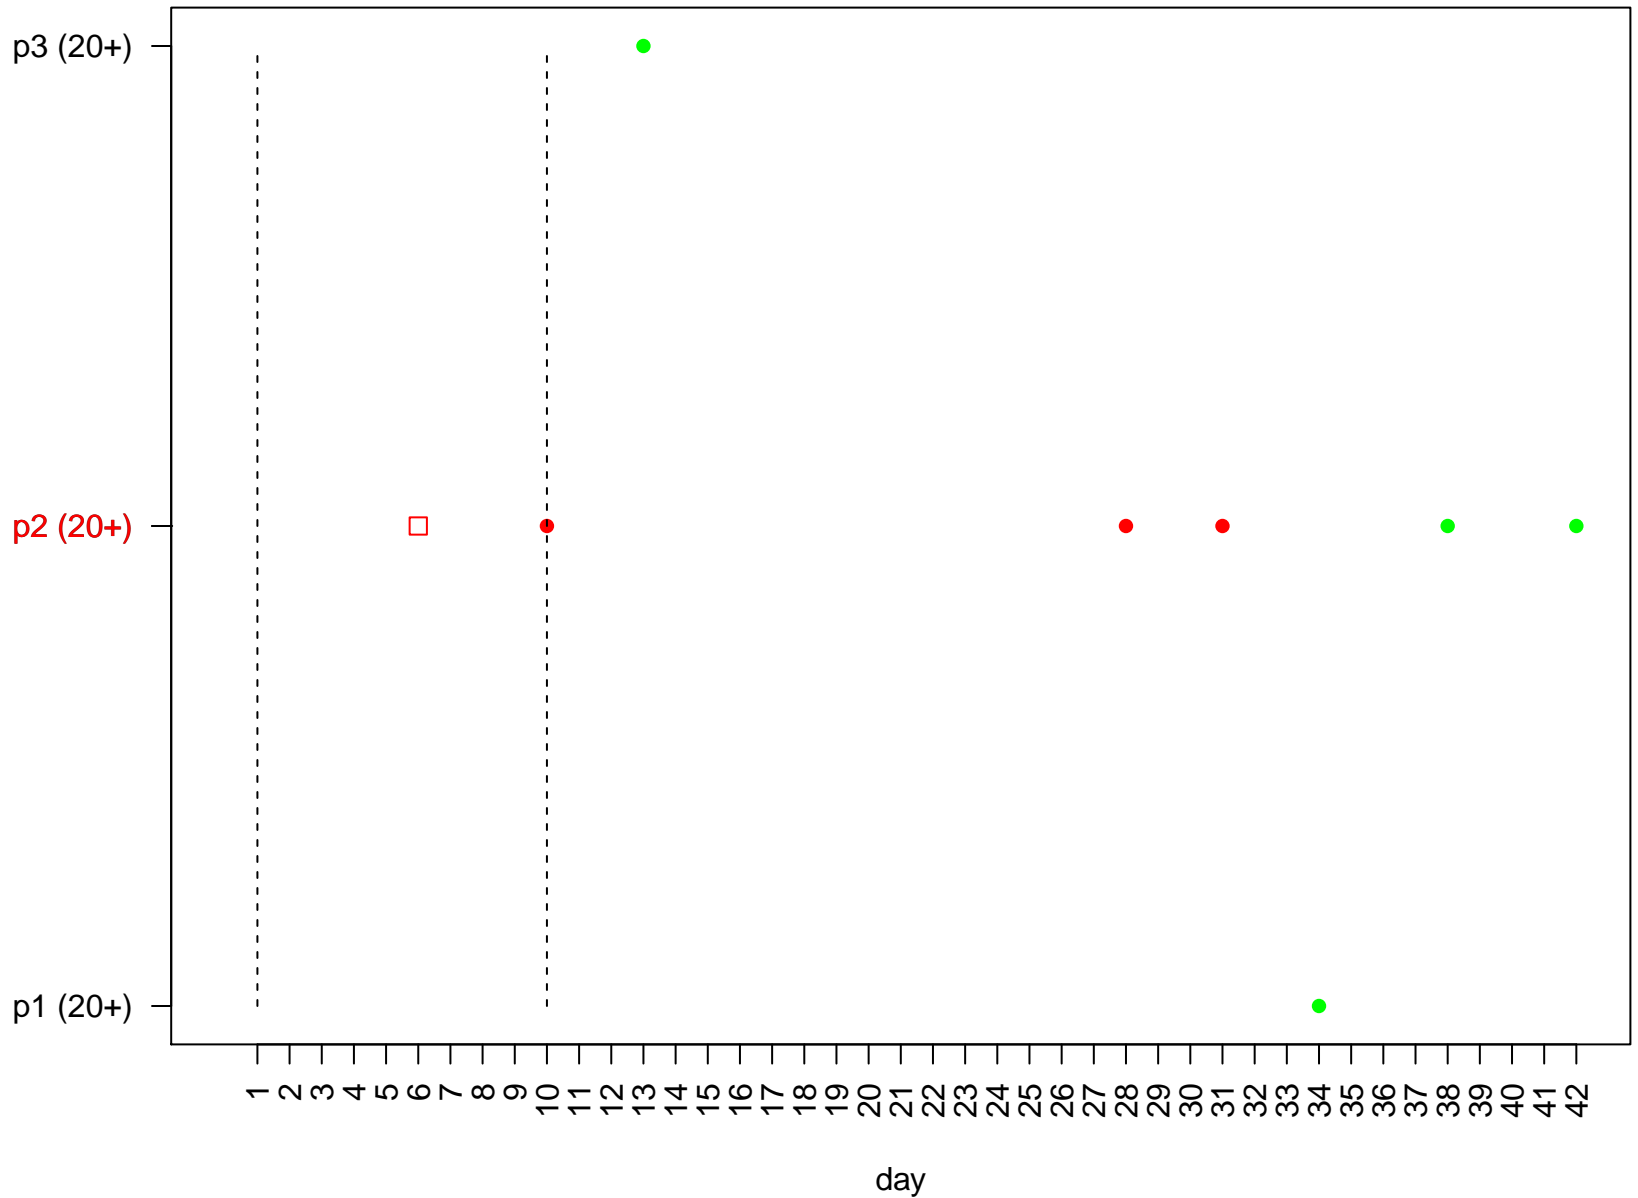

# Household 535

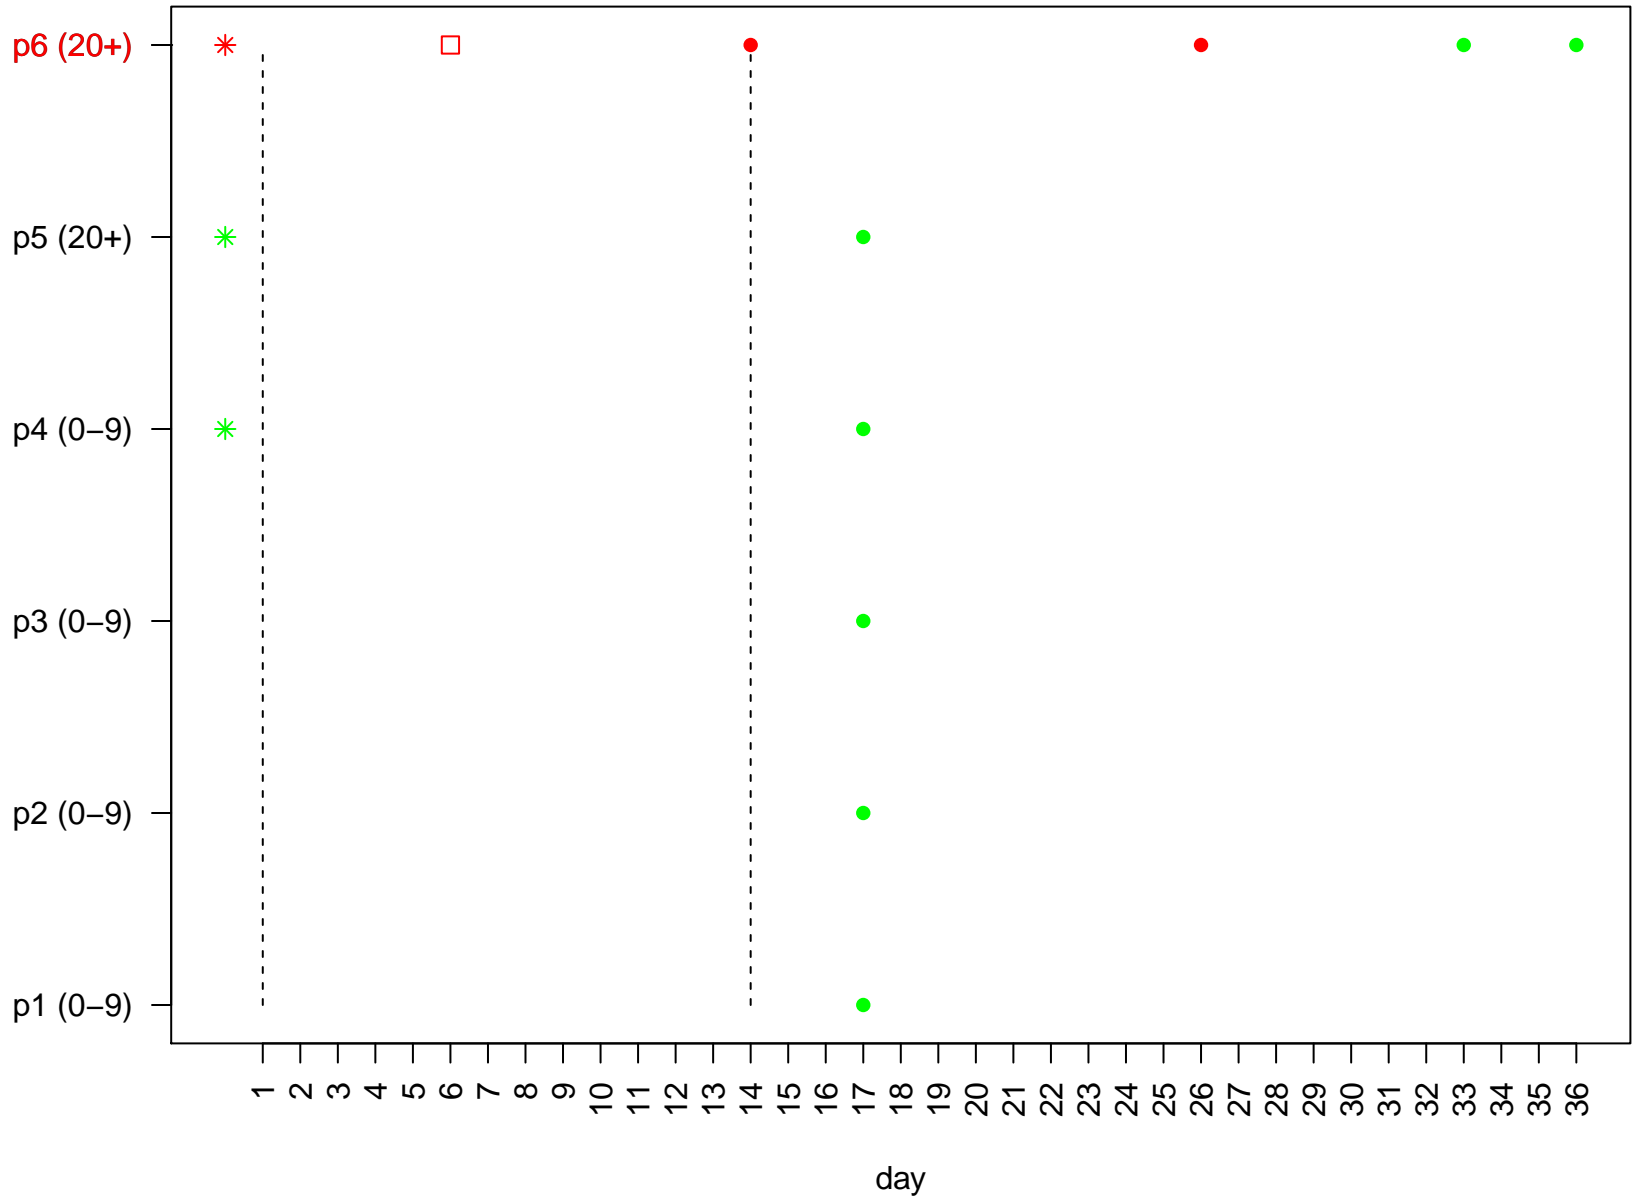

# Household 536

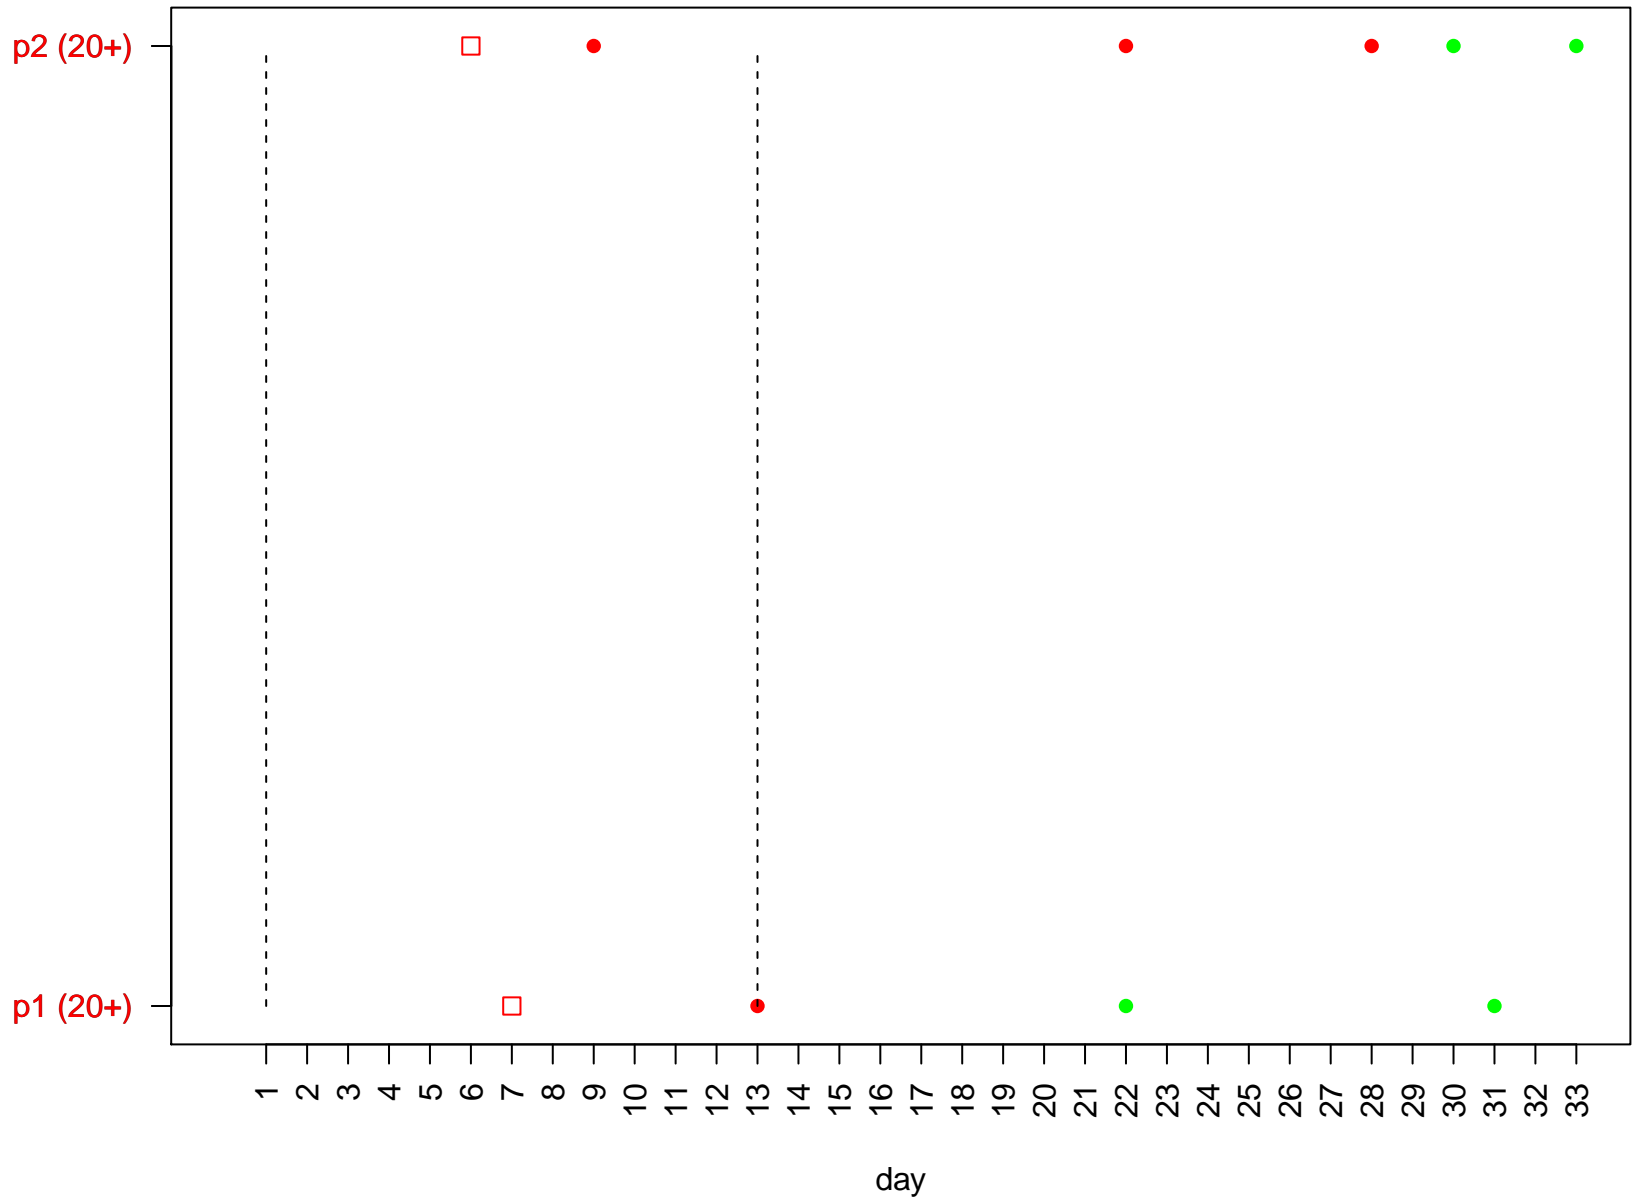



# Household 537

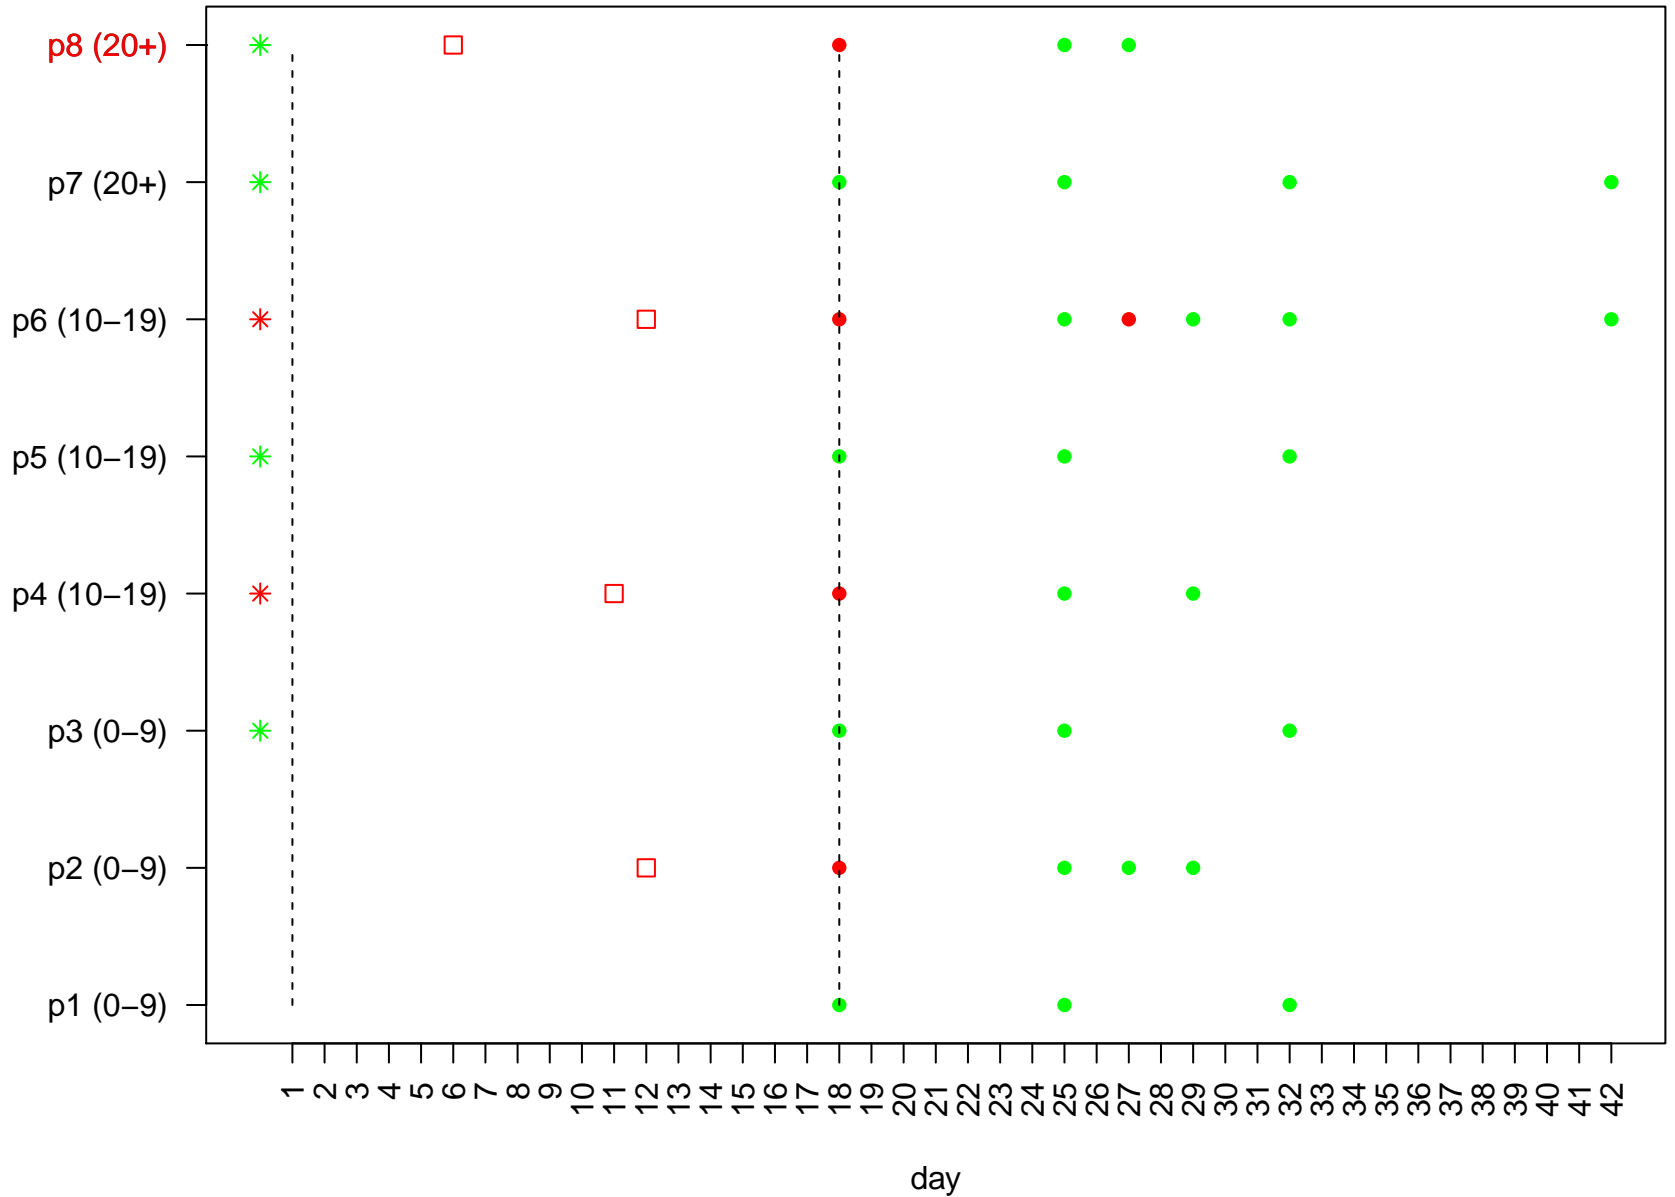

# Household 538

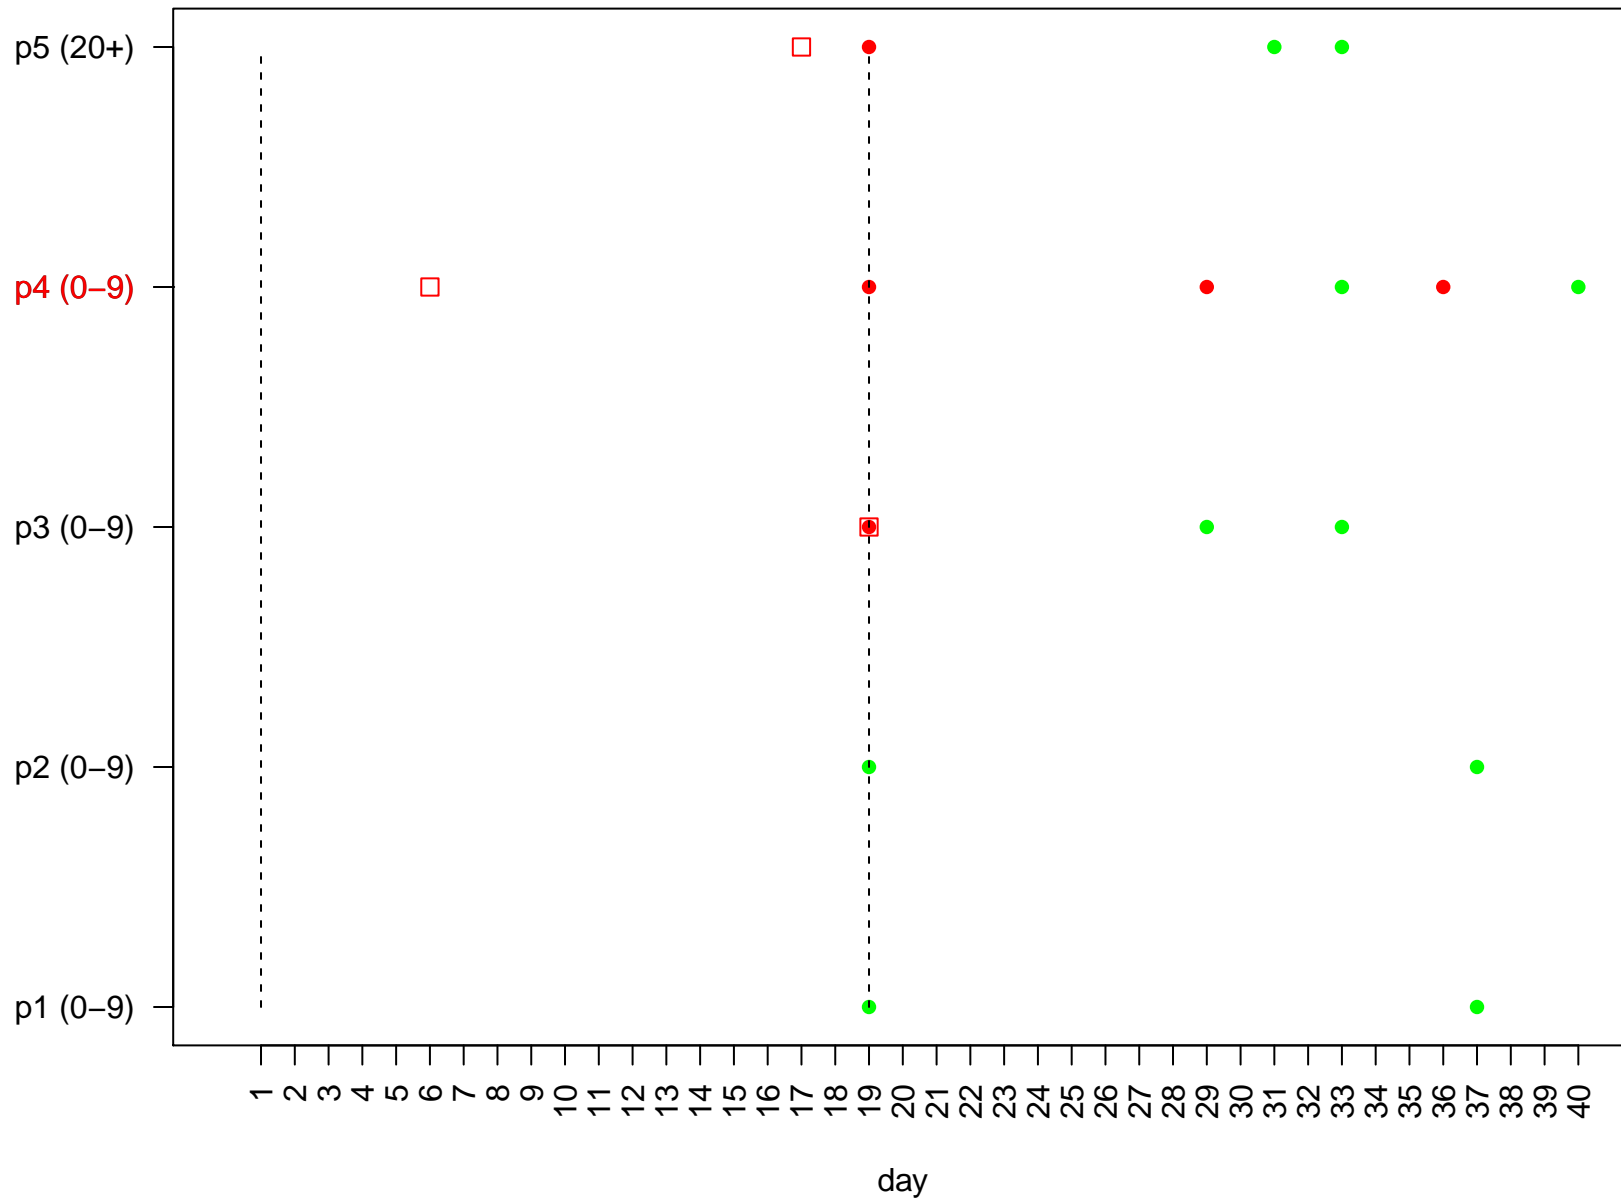

# Household 539

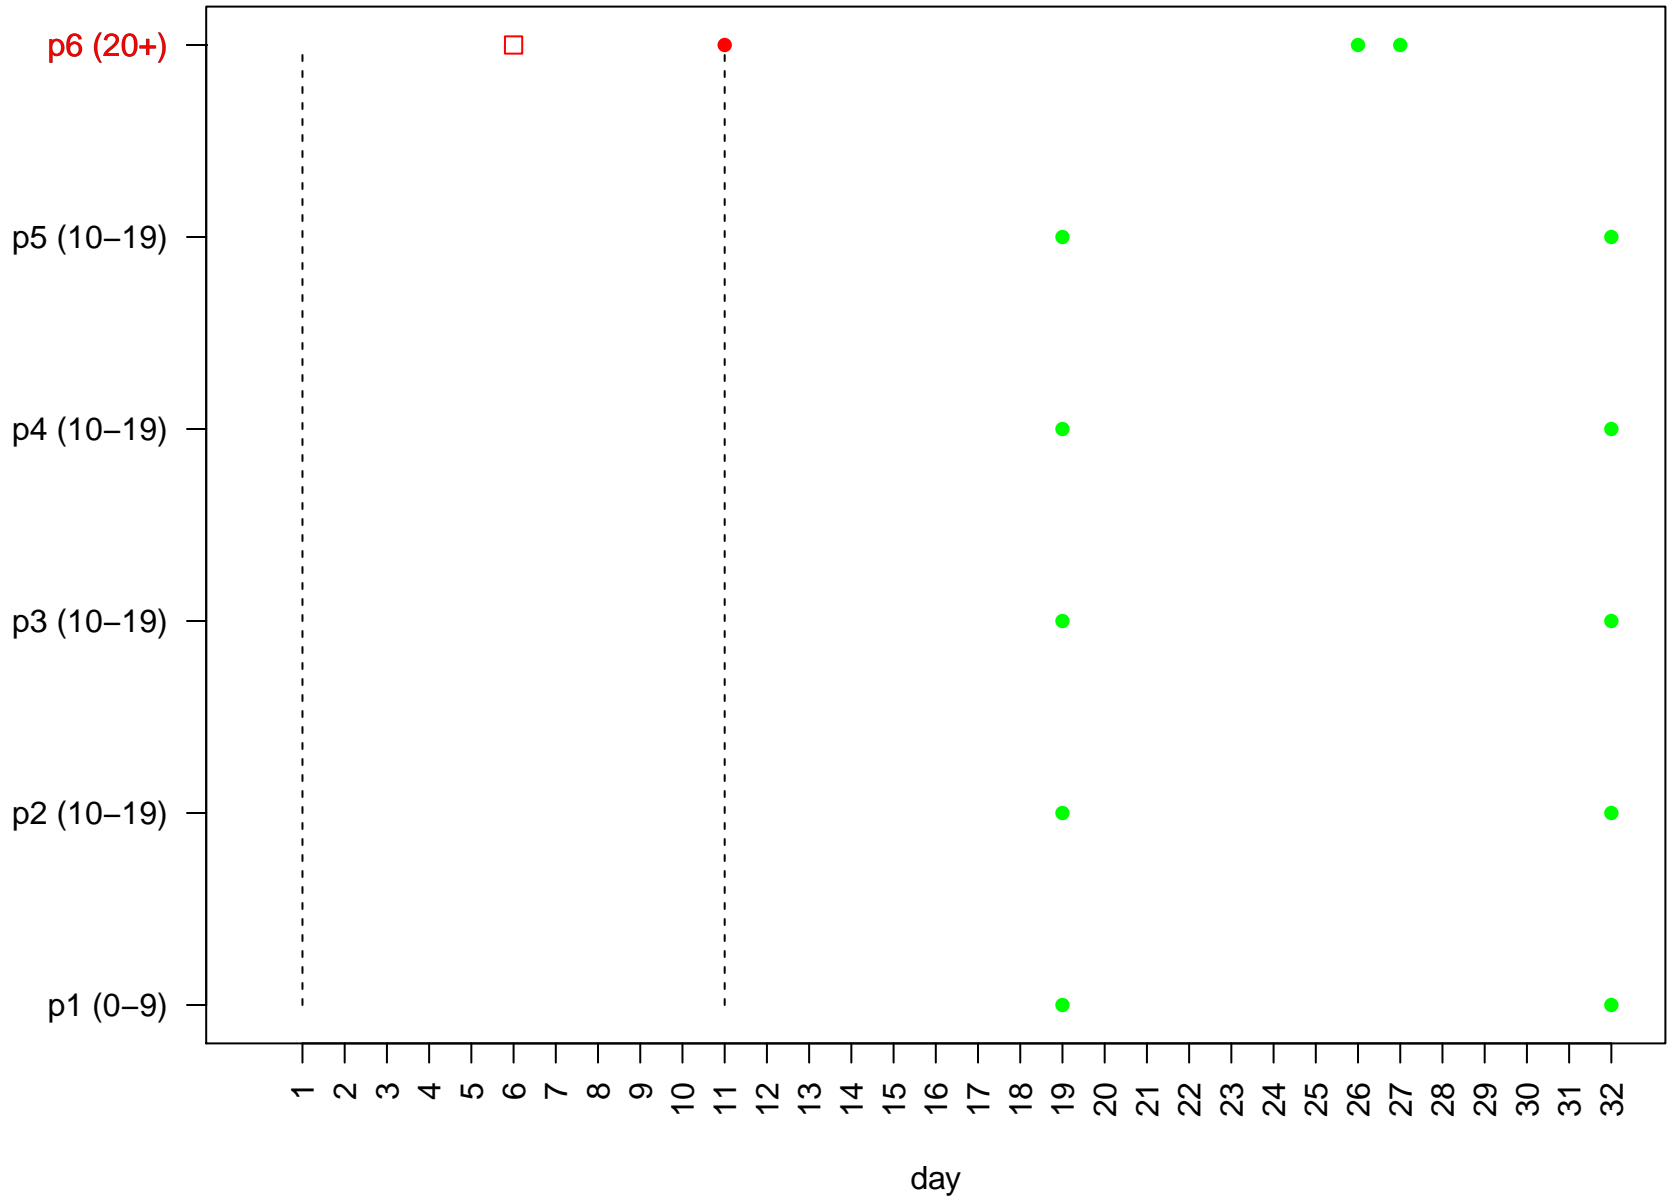

# Household 540

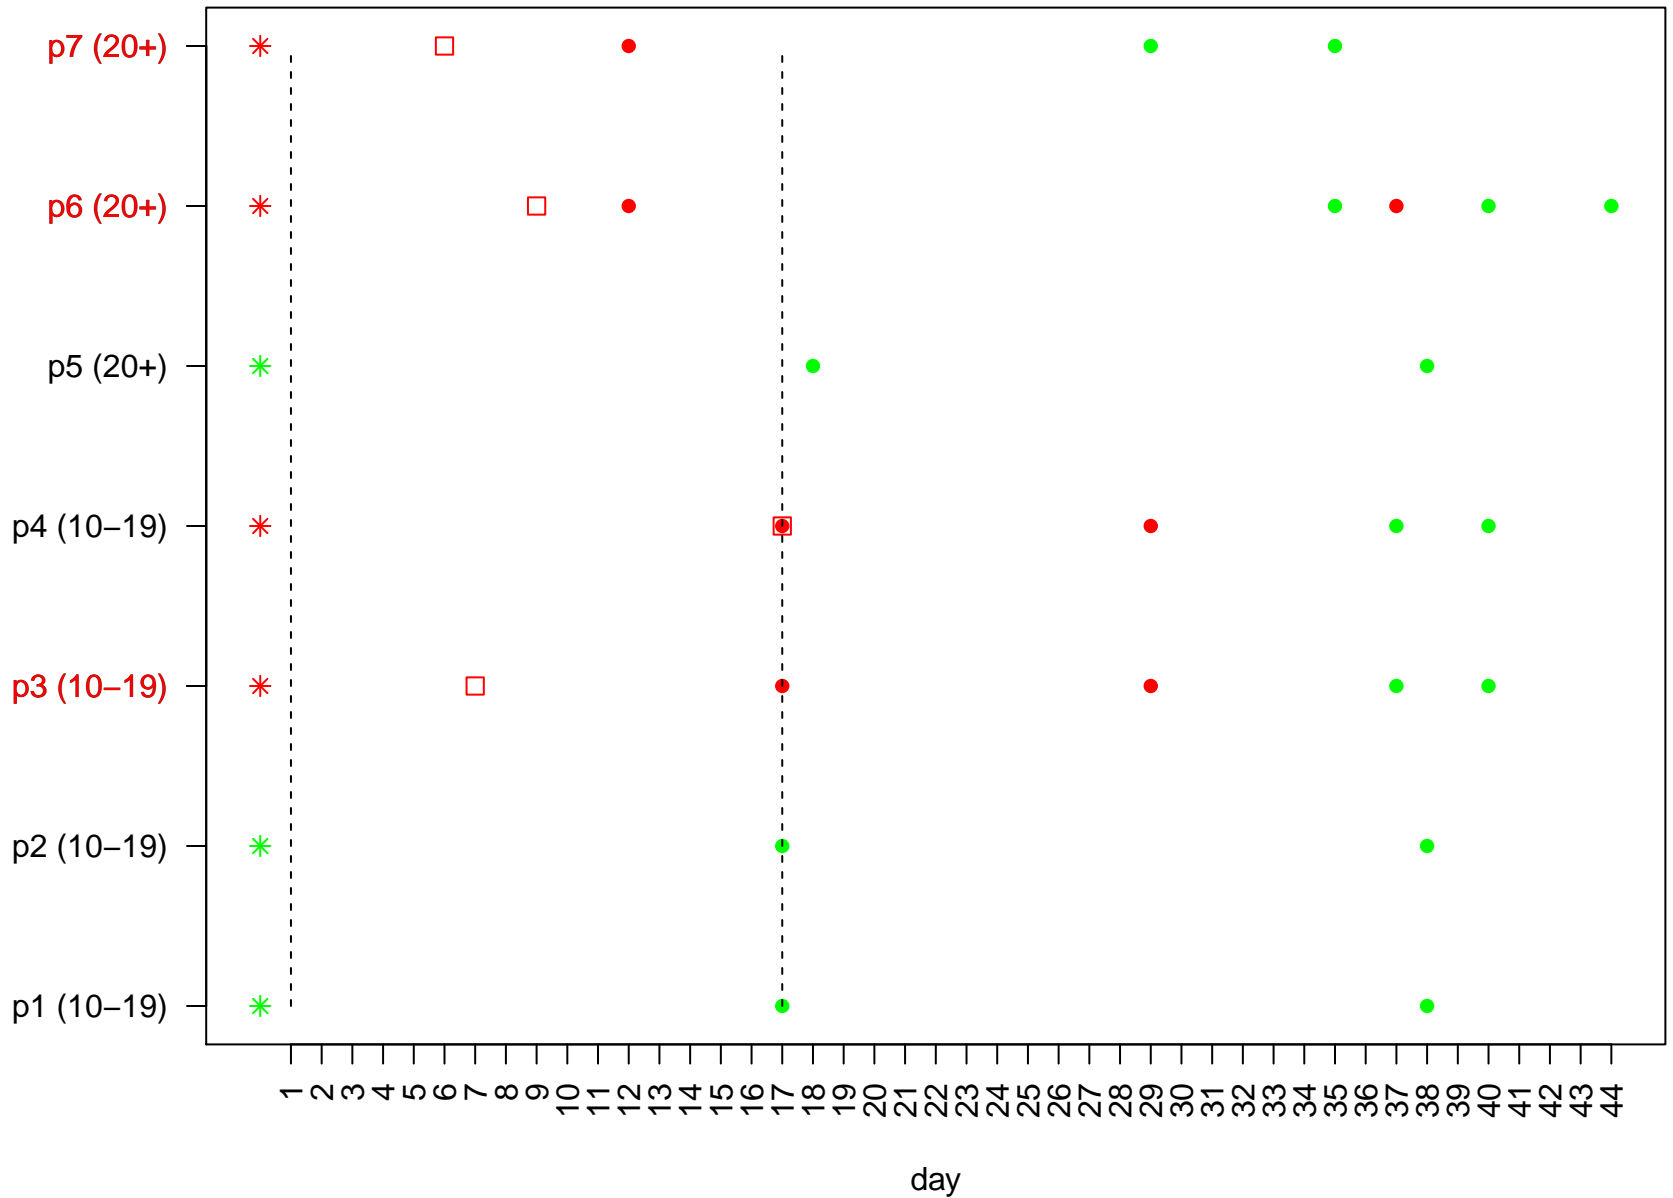

# Household 541

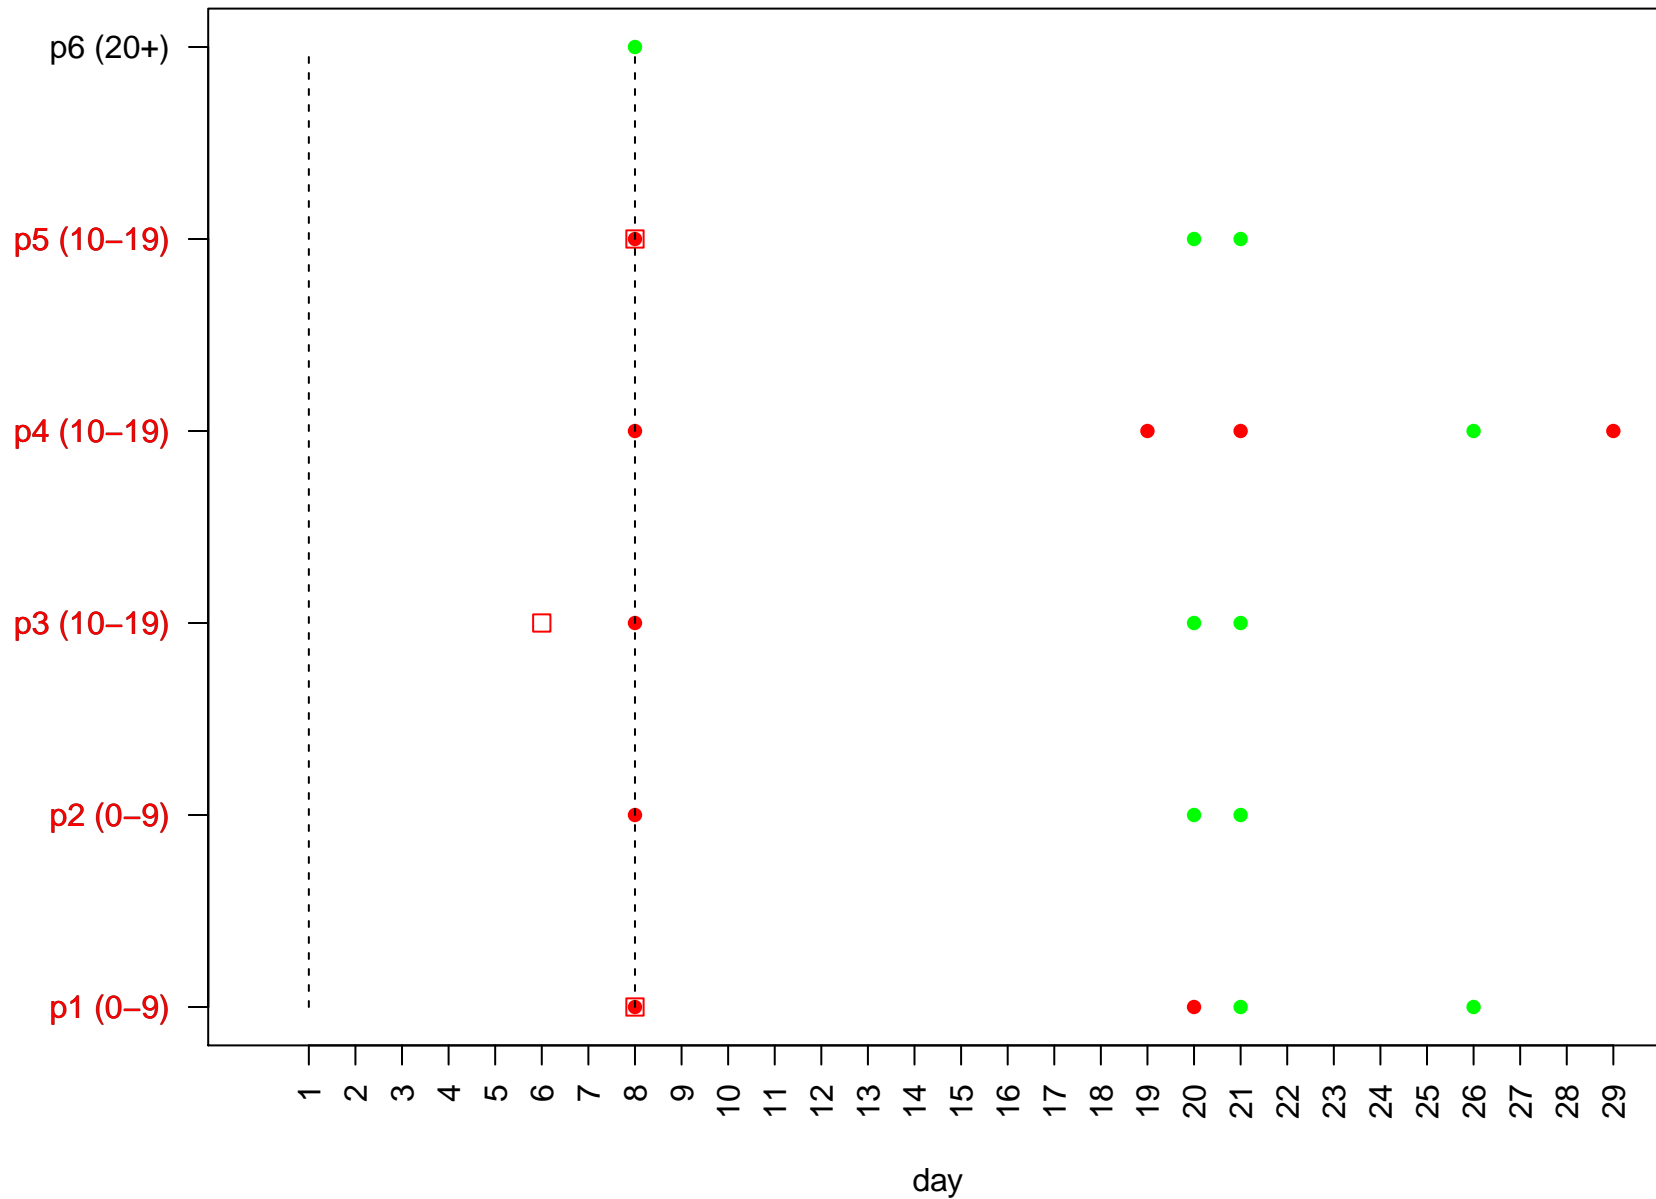

# Household 542

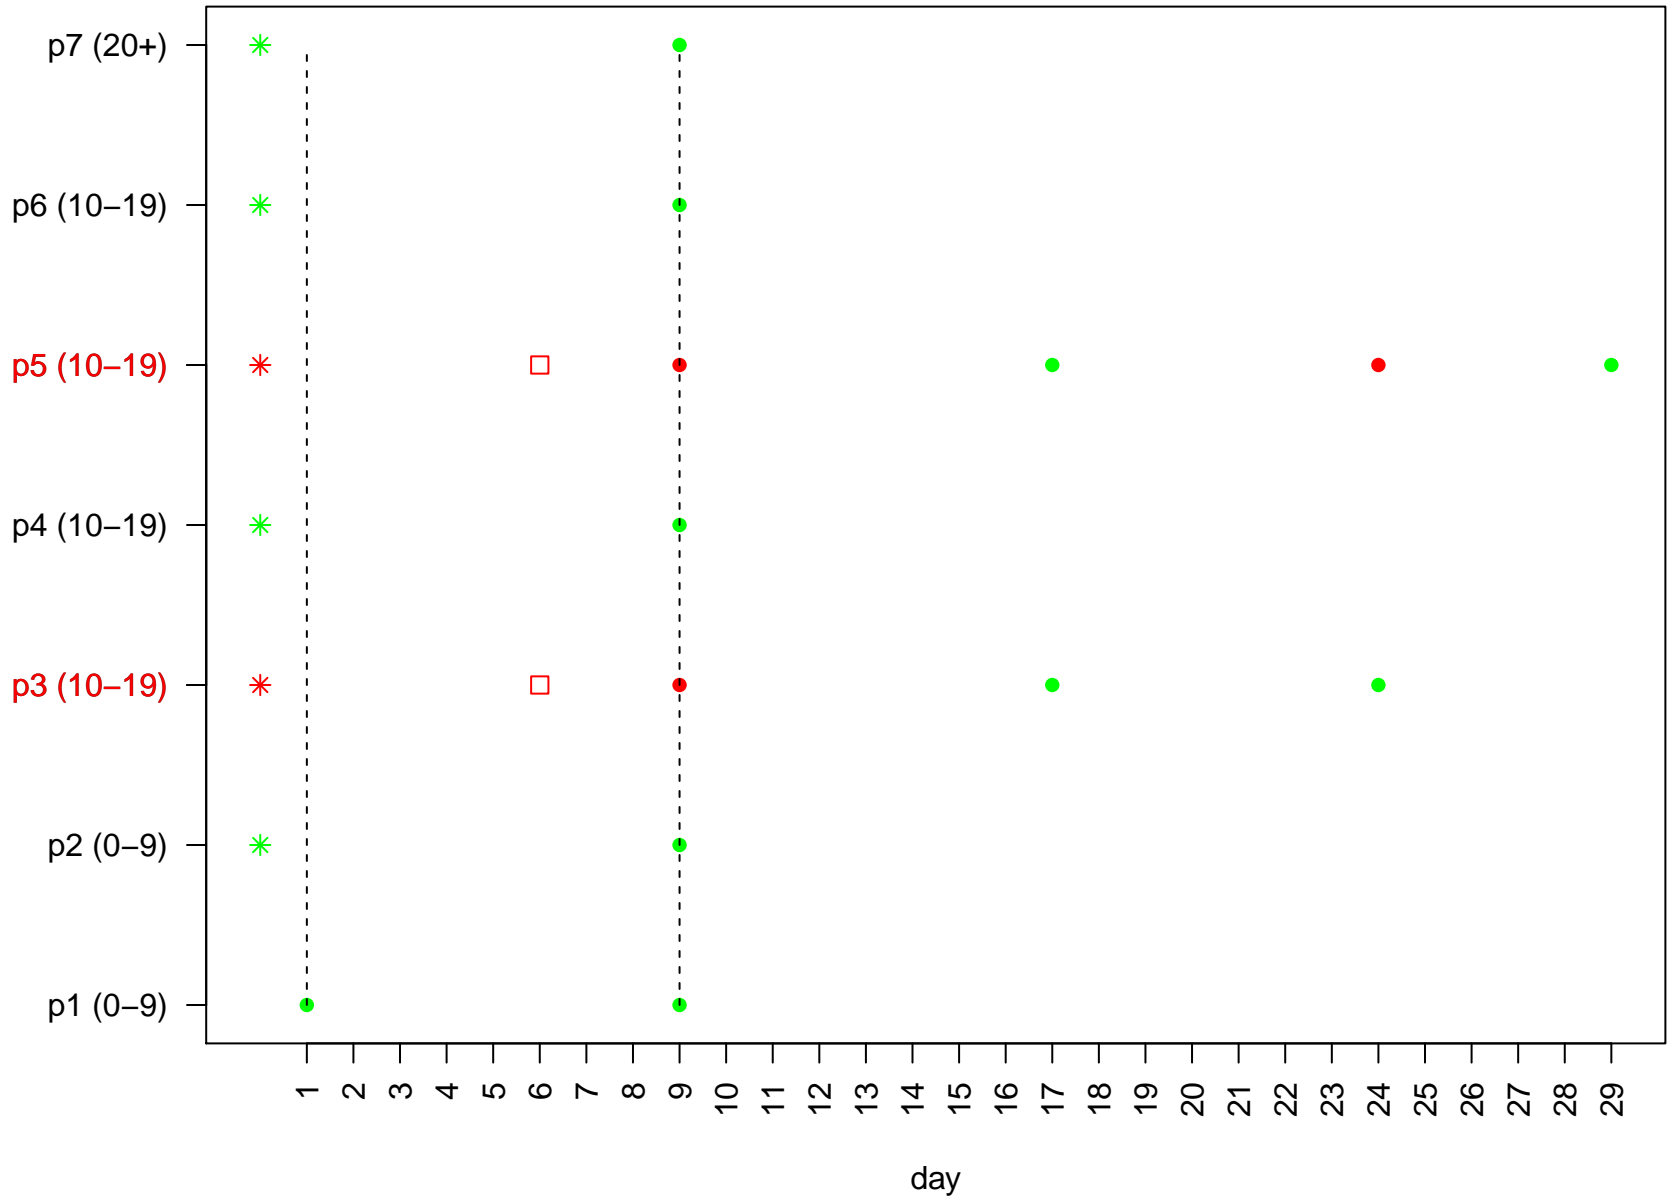

# Household 543

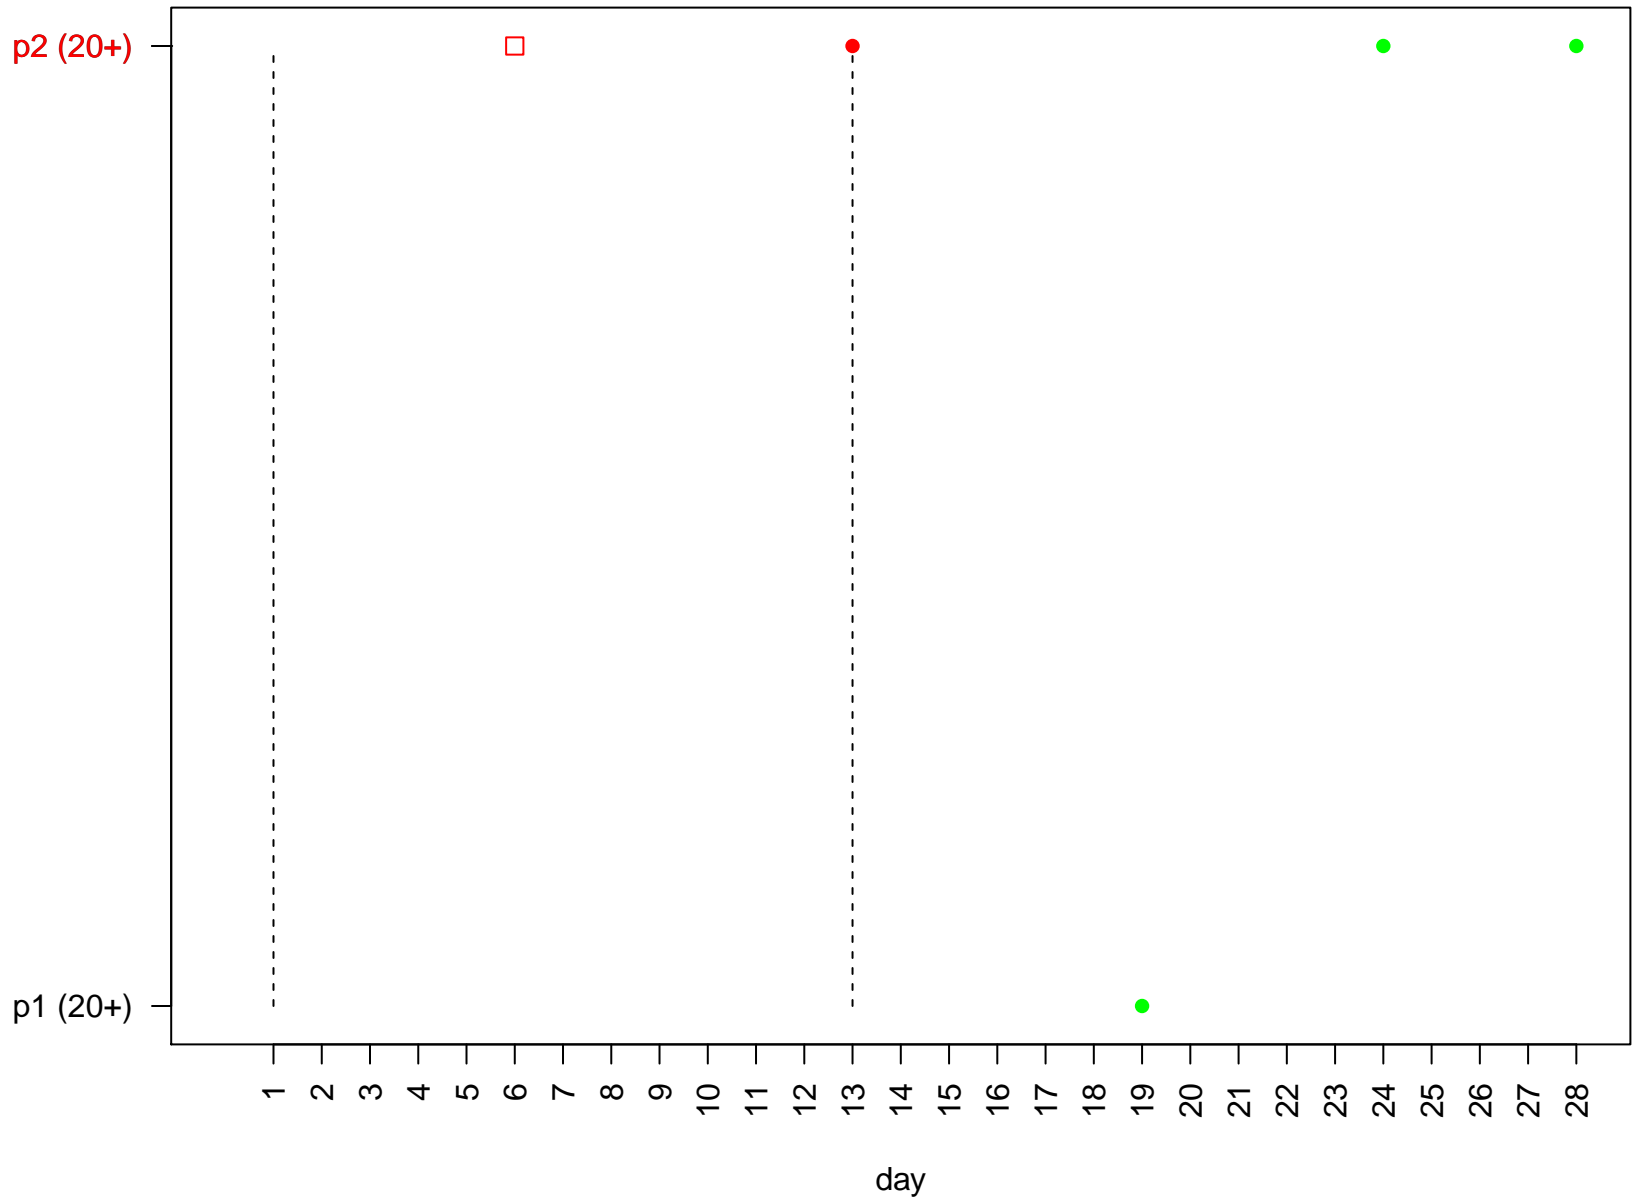

# Household 544

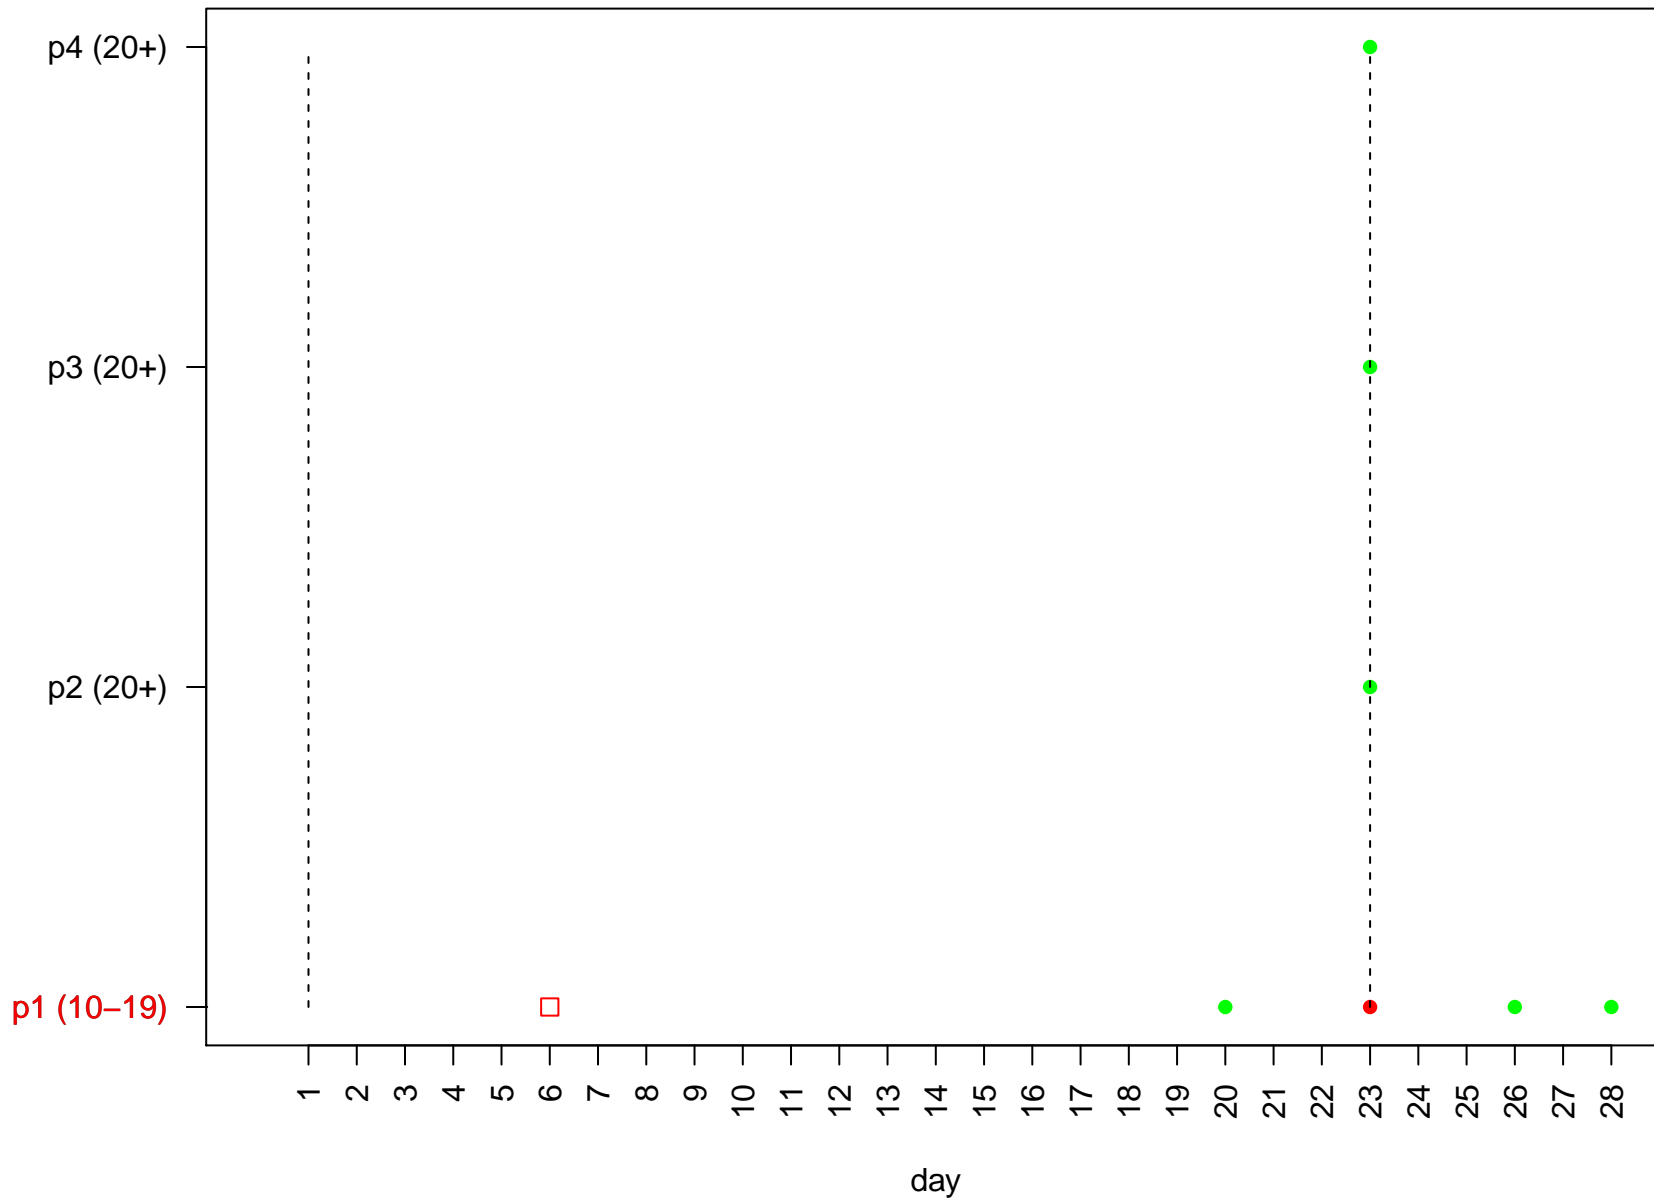



# Household 545

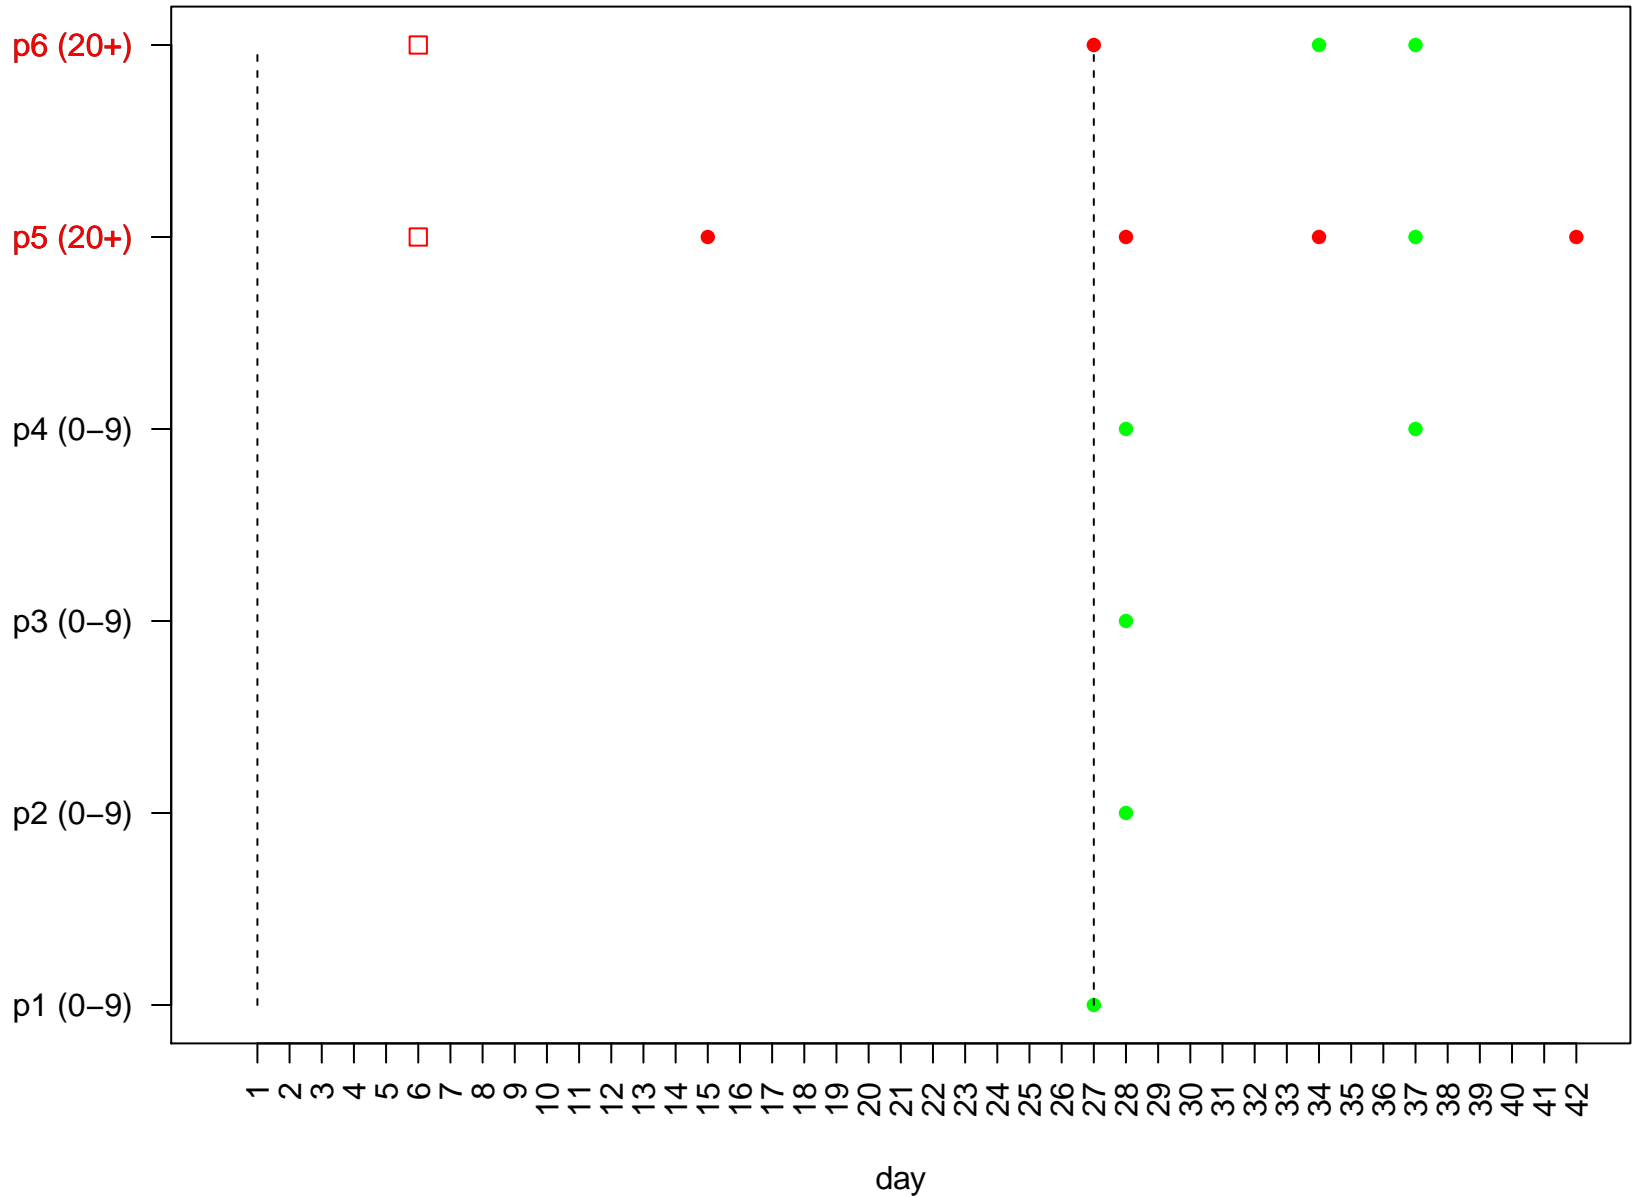

# Household 546

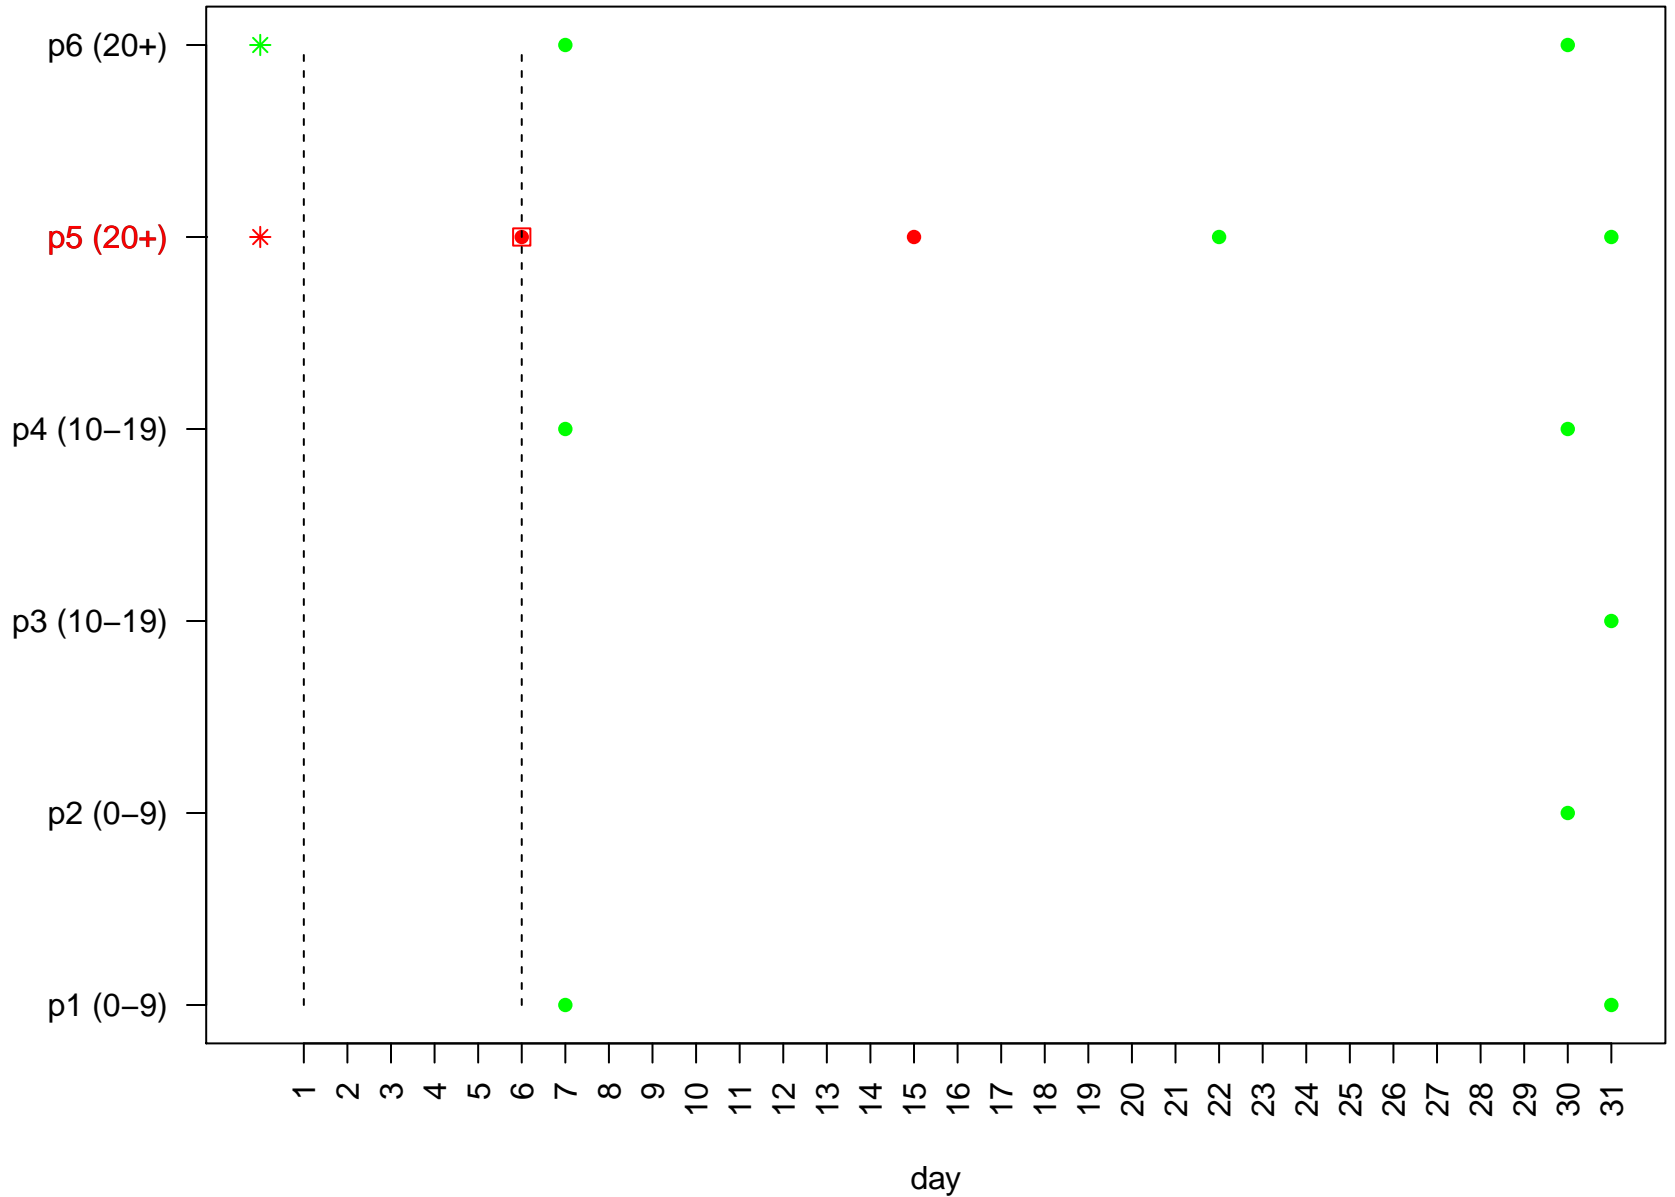

# Household 547

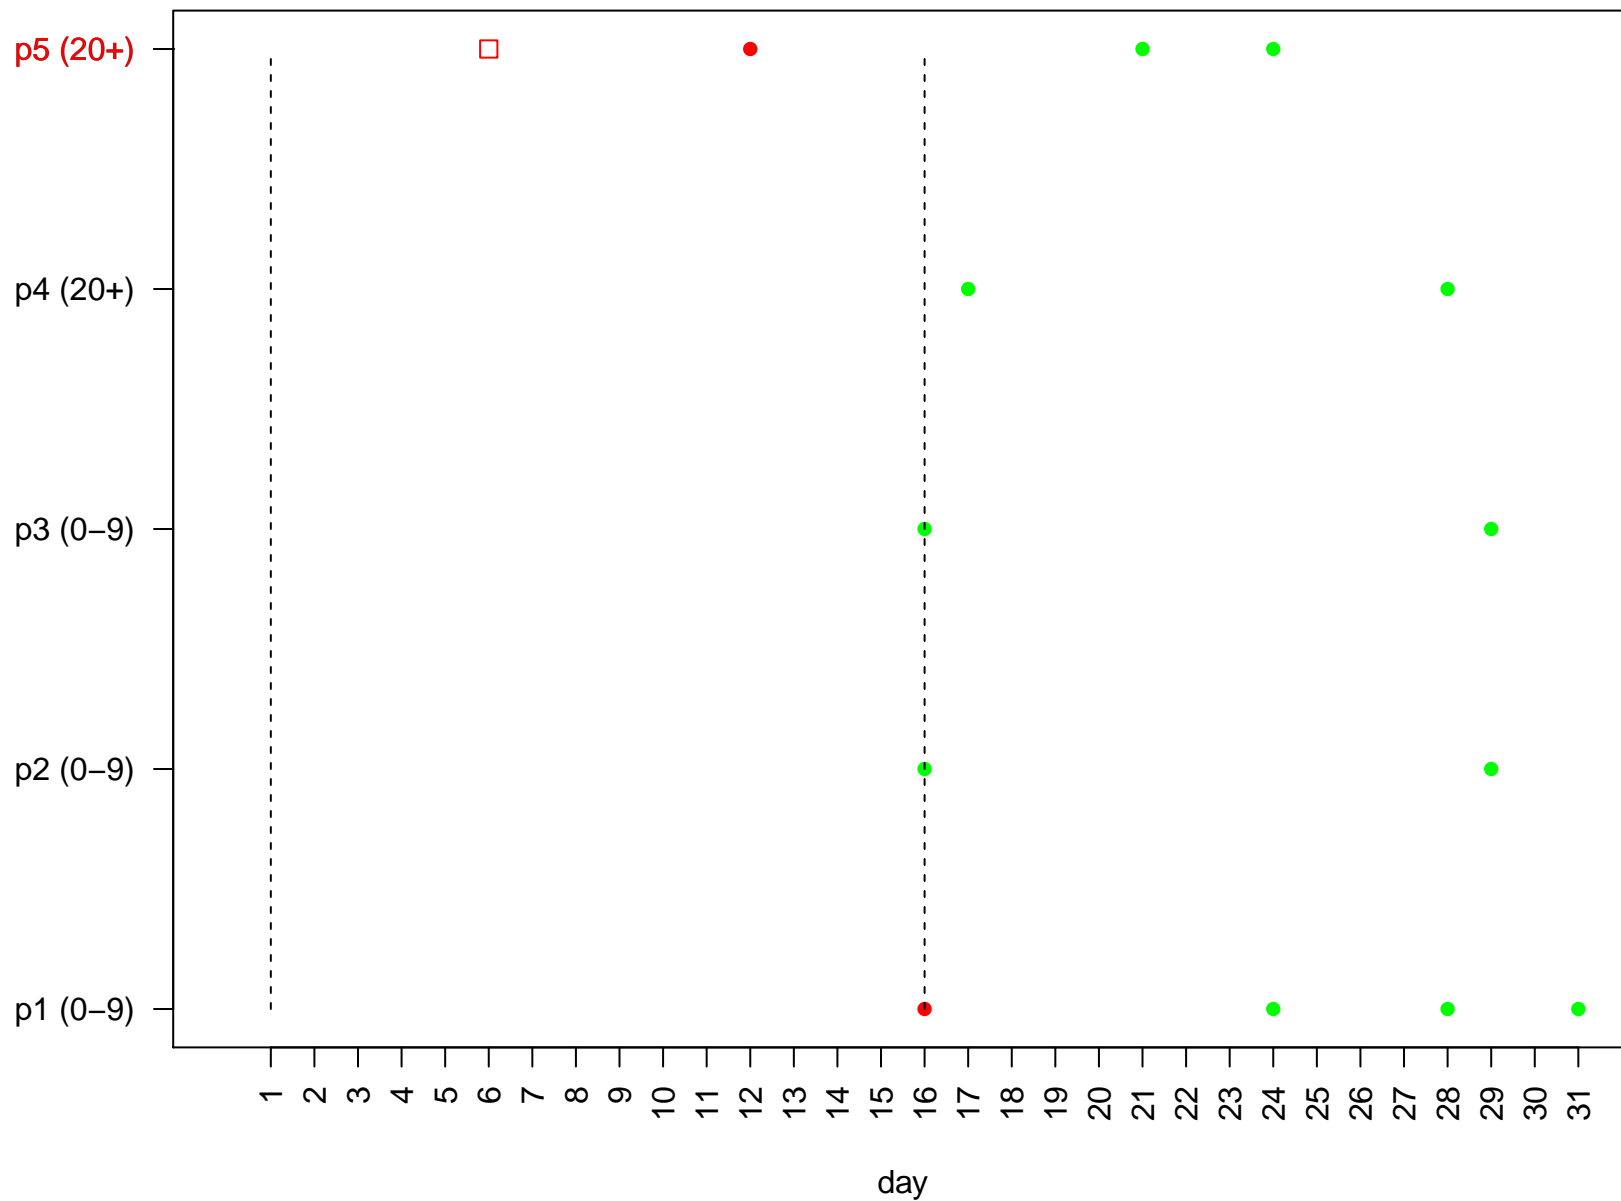

# Household 548

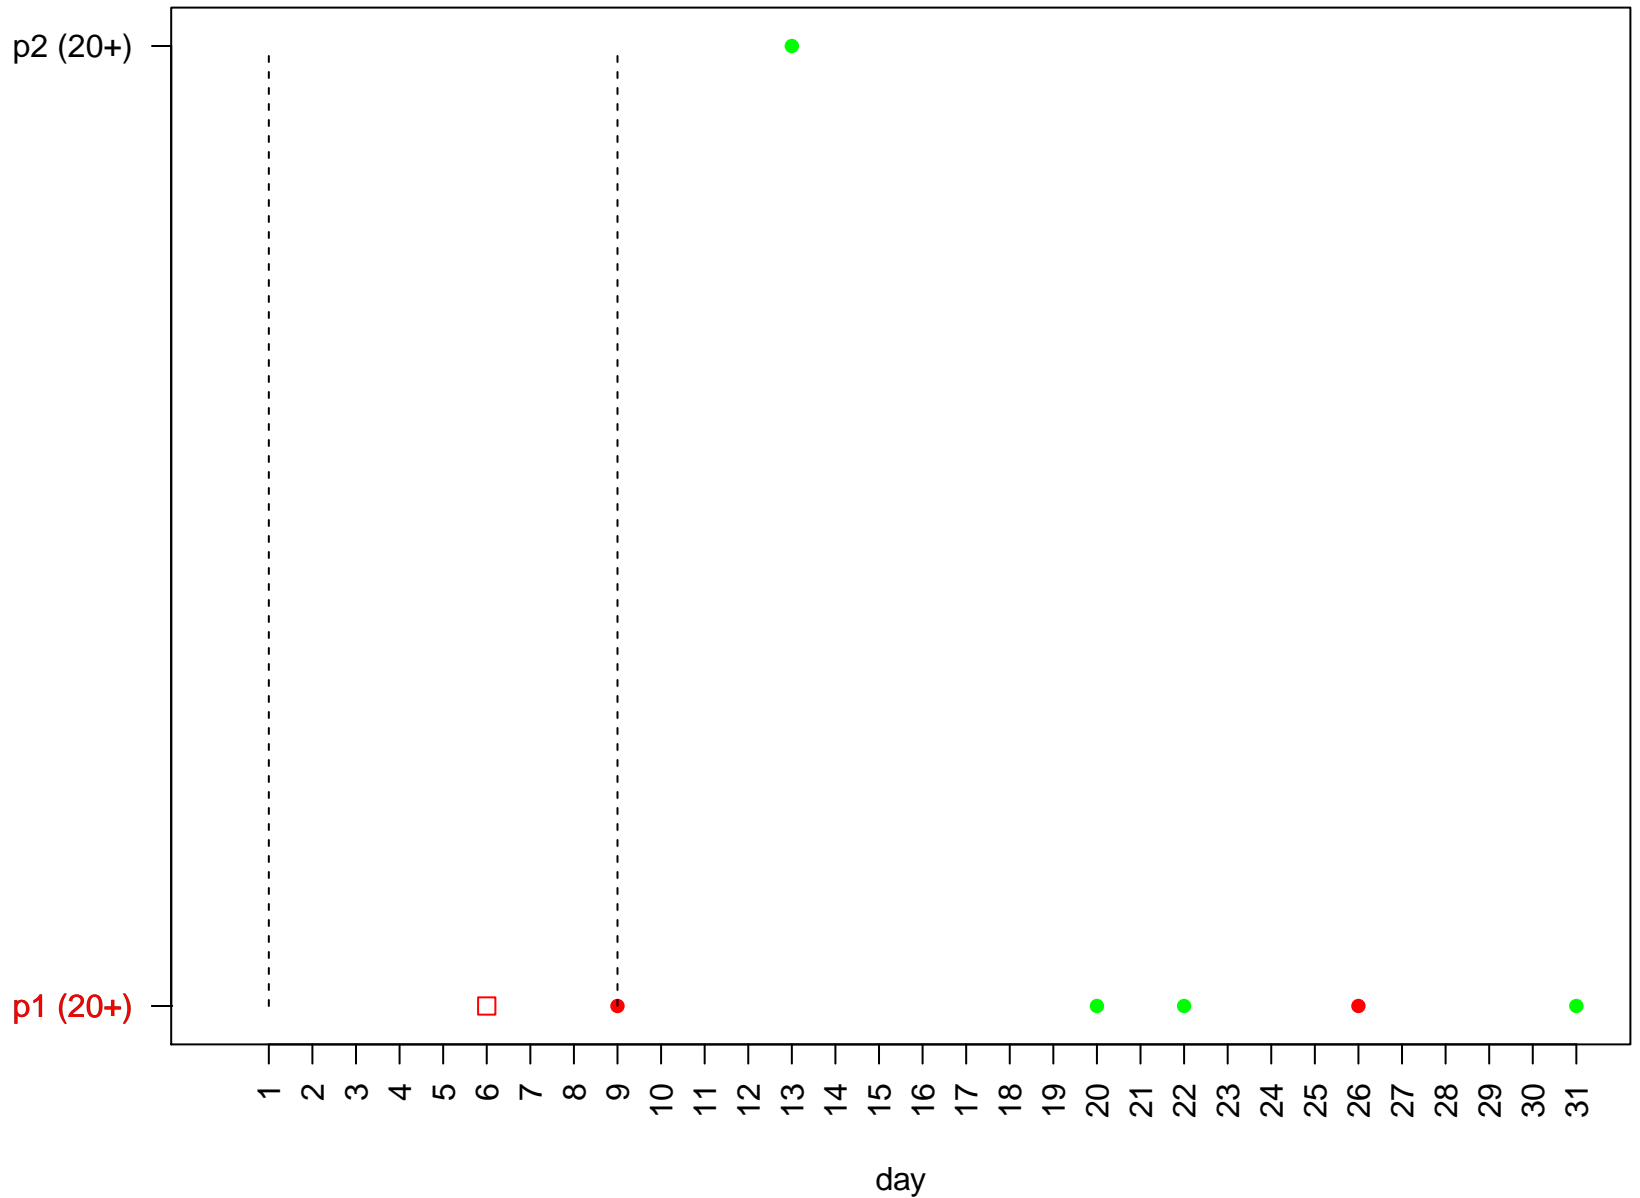



# Household 550

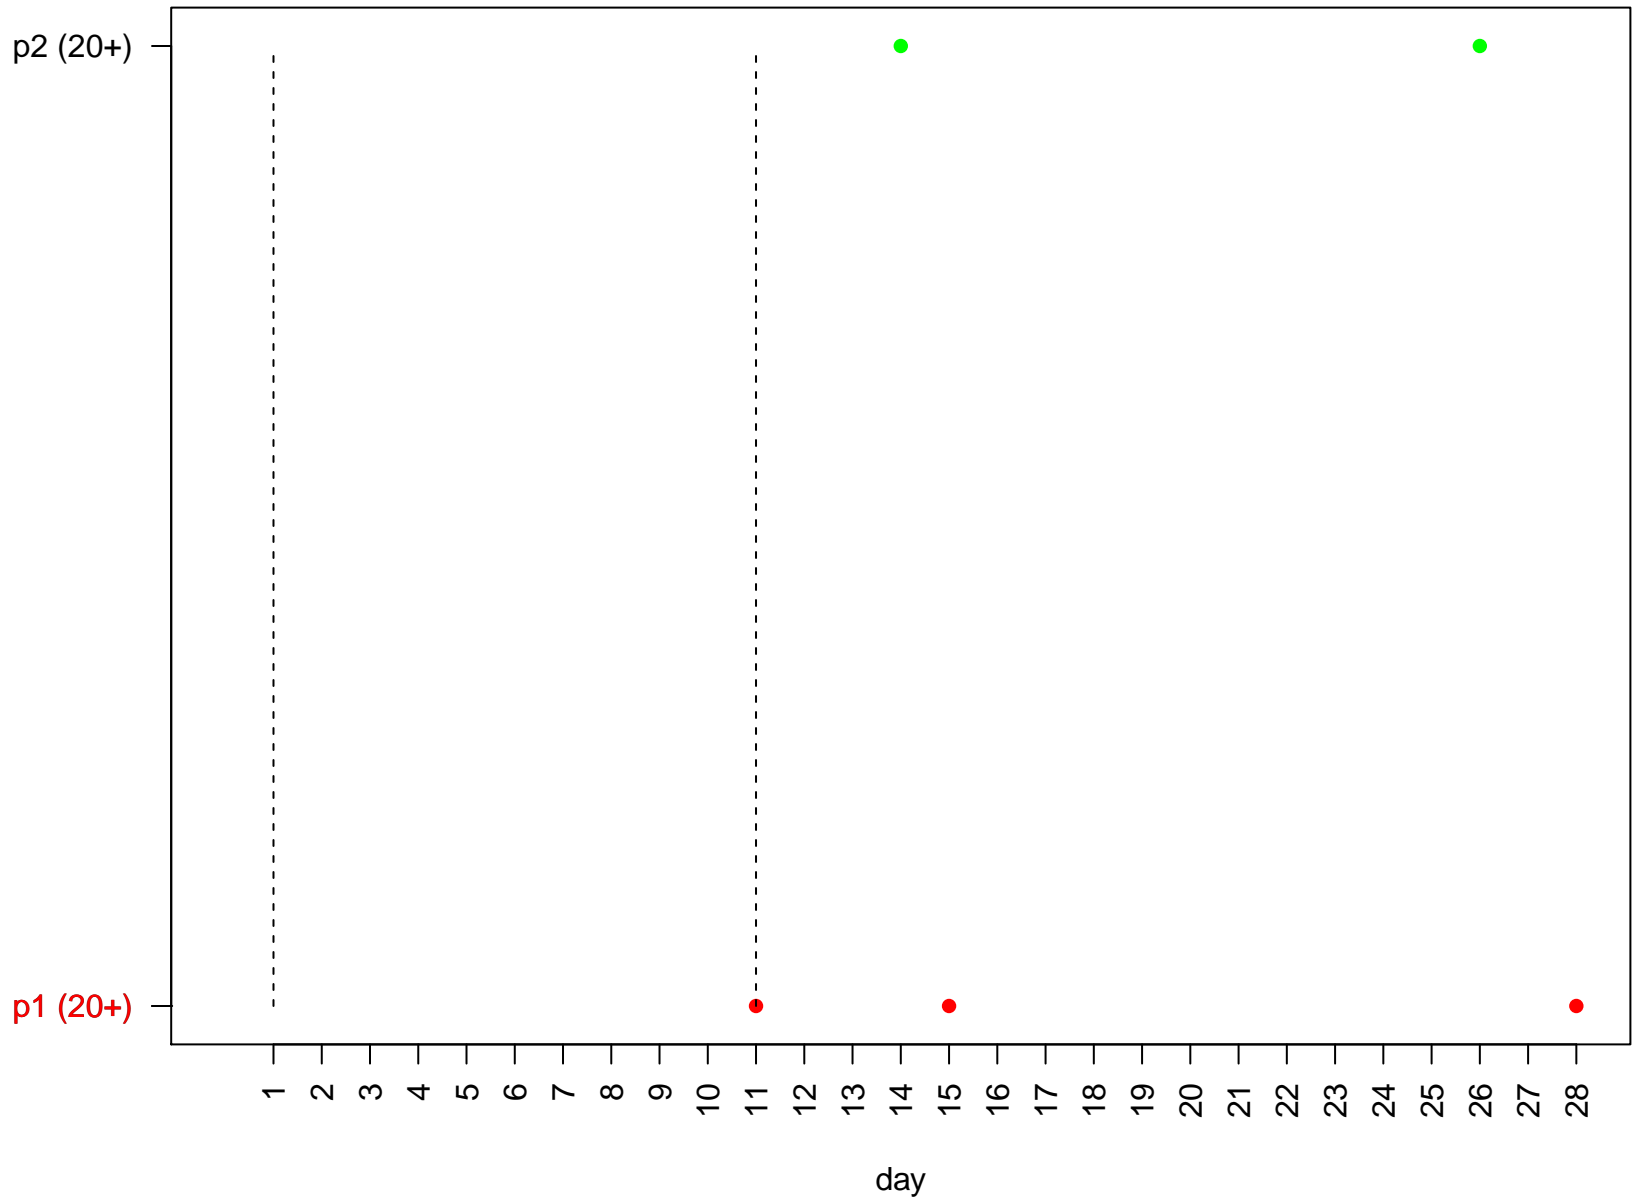

# Household 551

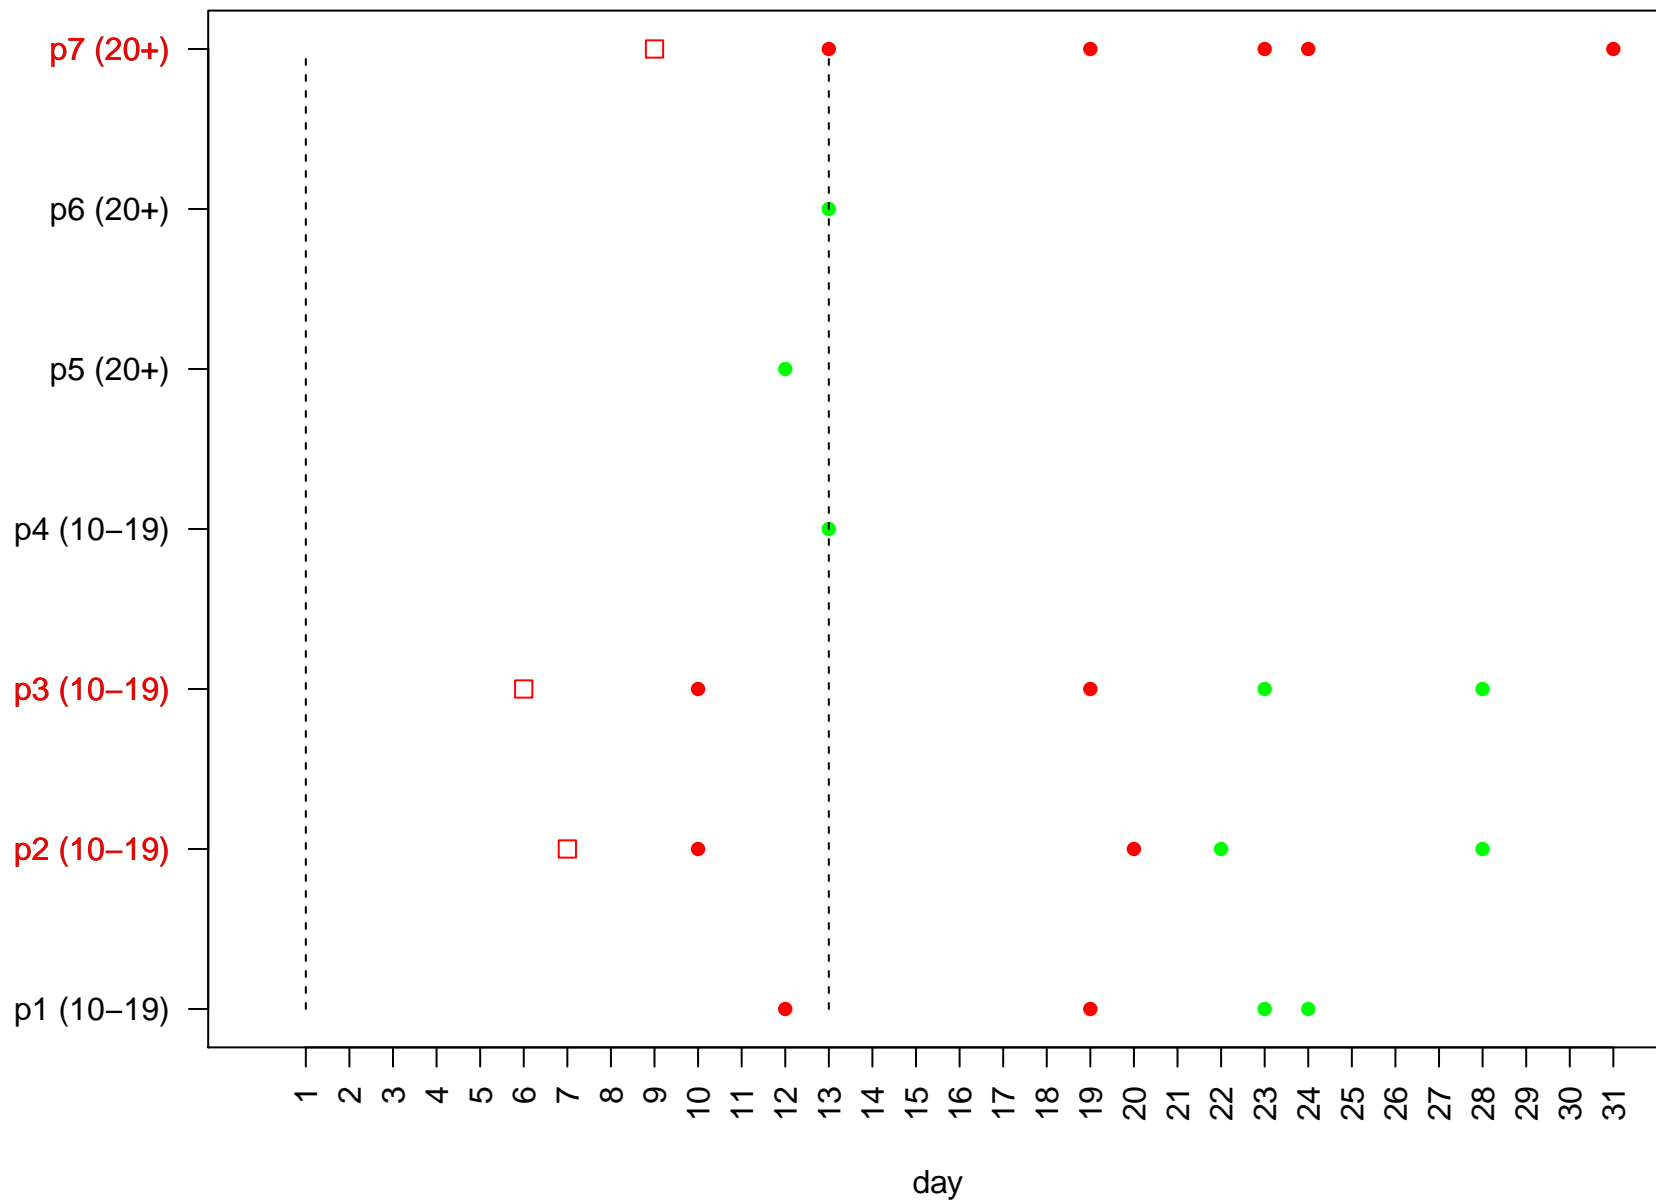

# Household 552

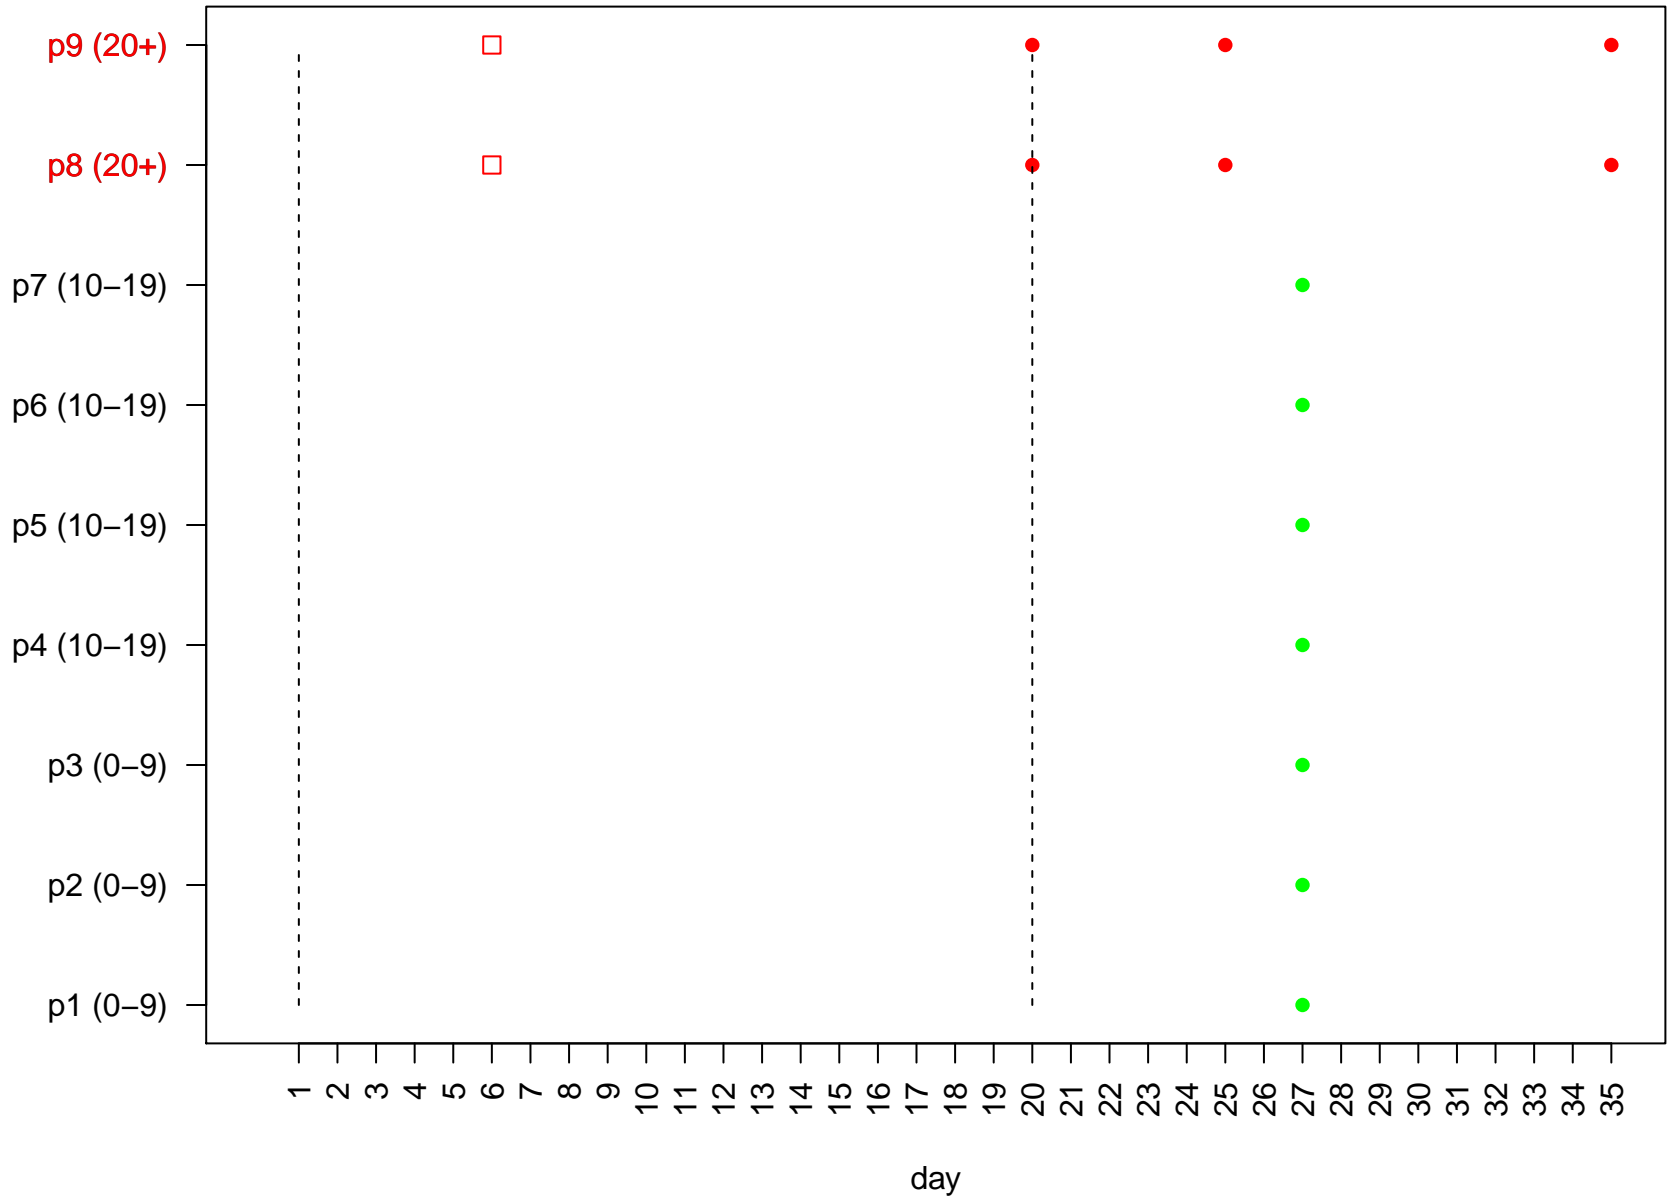



# Household 553

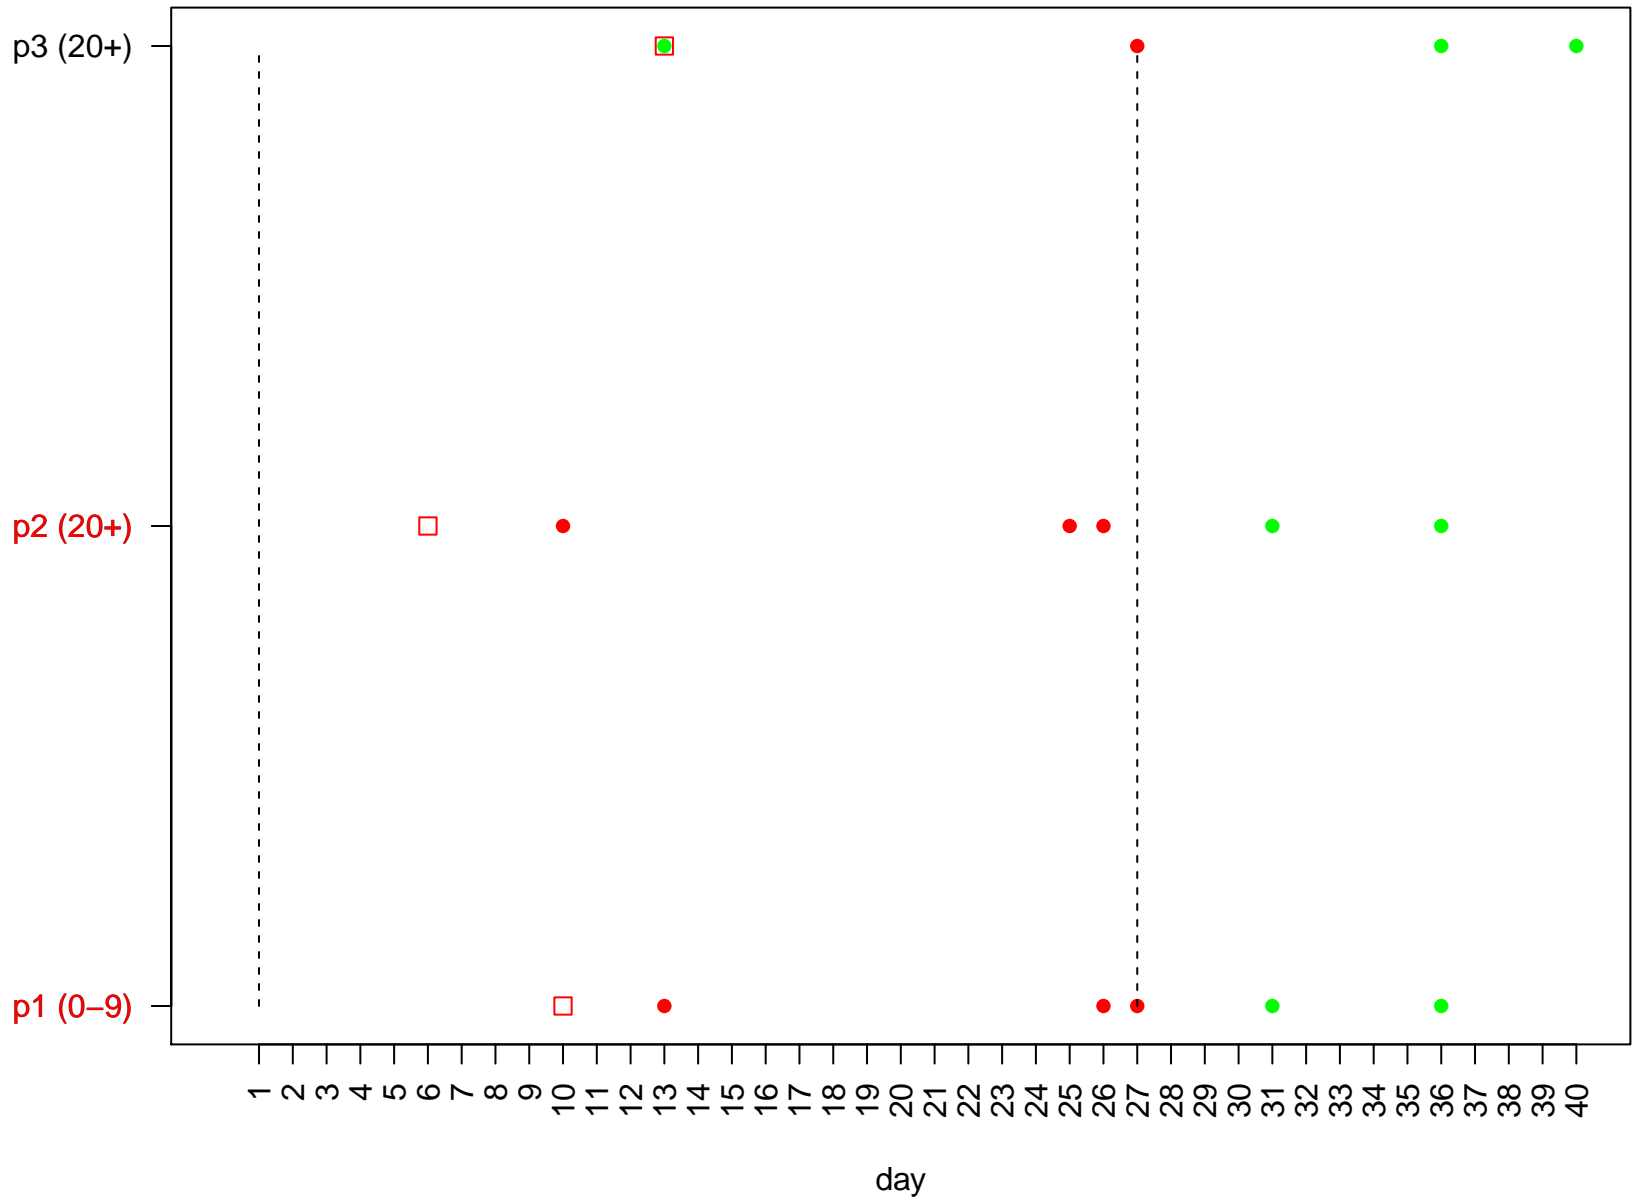

# Household 554

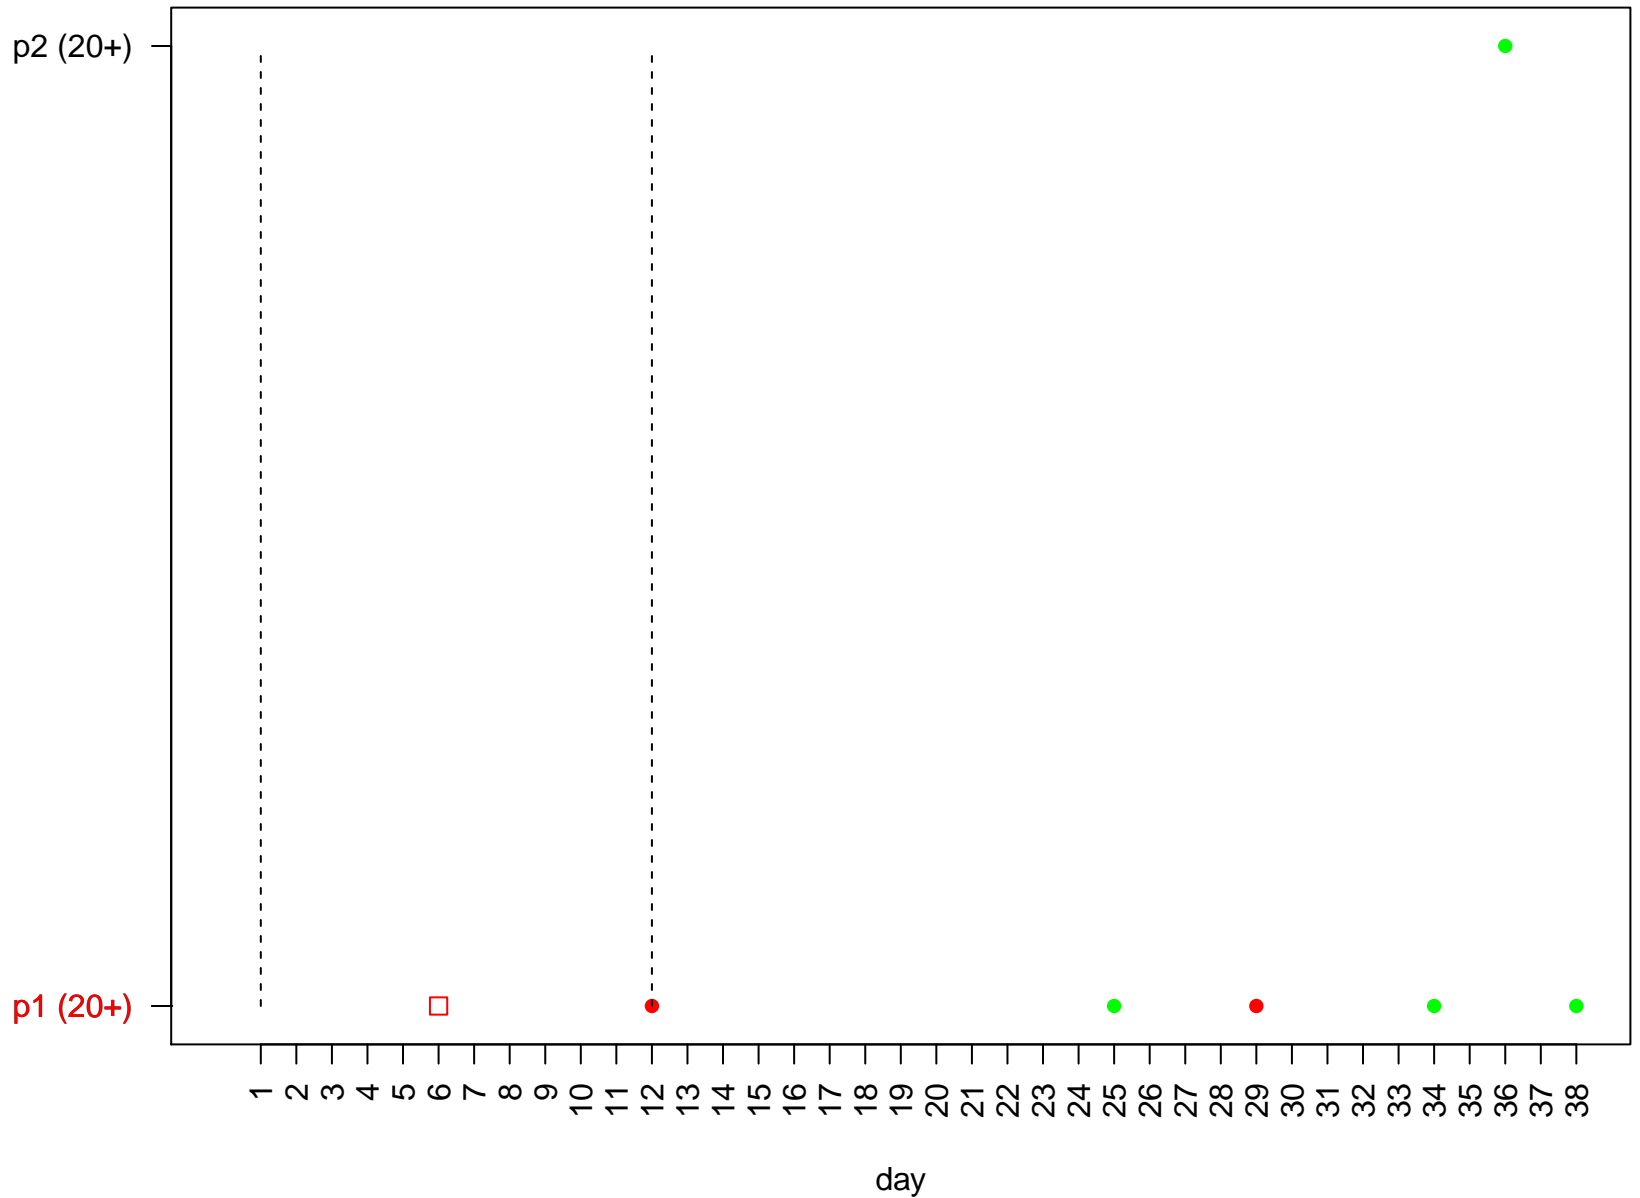

# Household 555

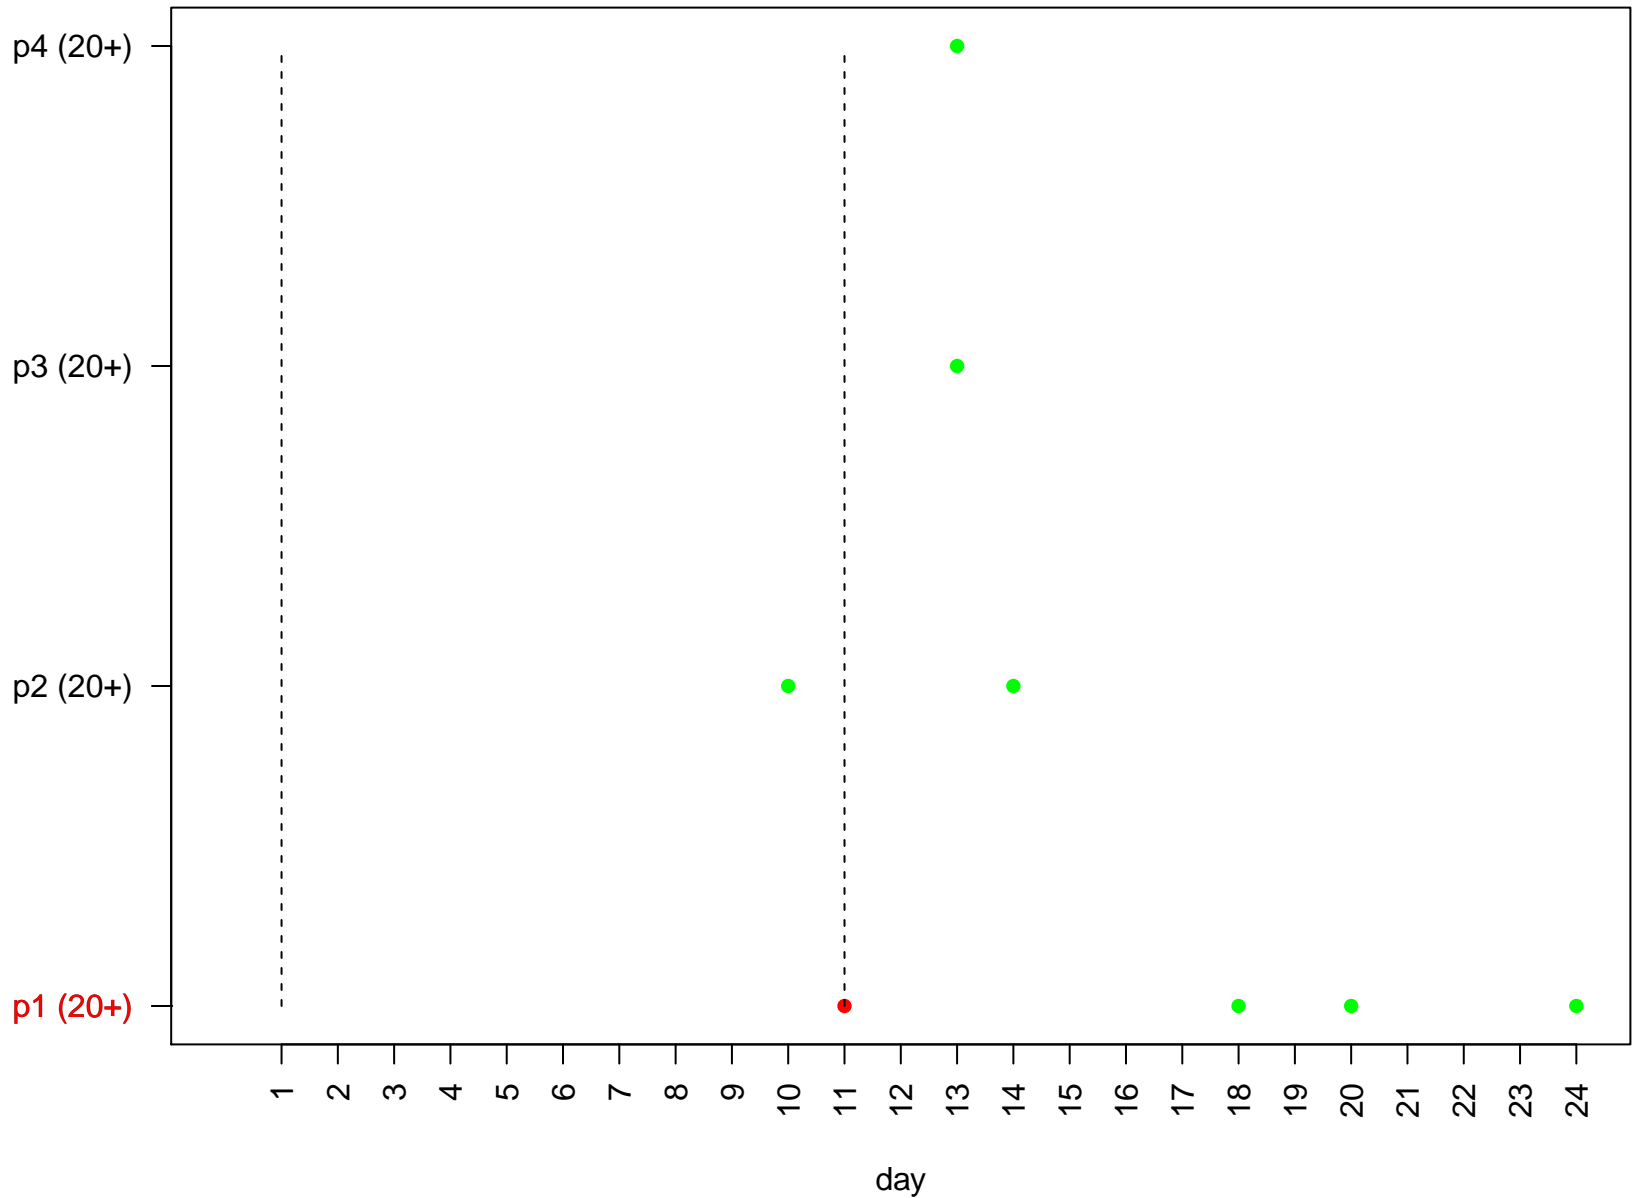

# Household 557

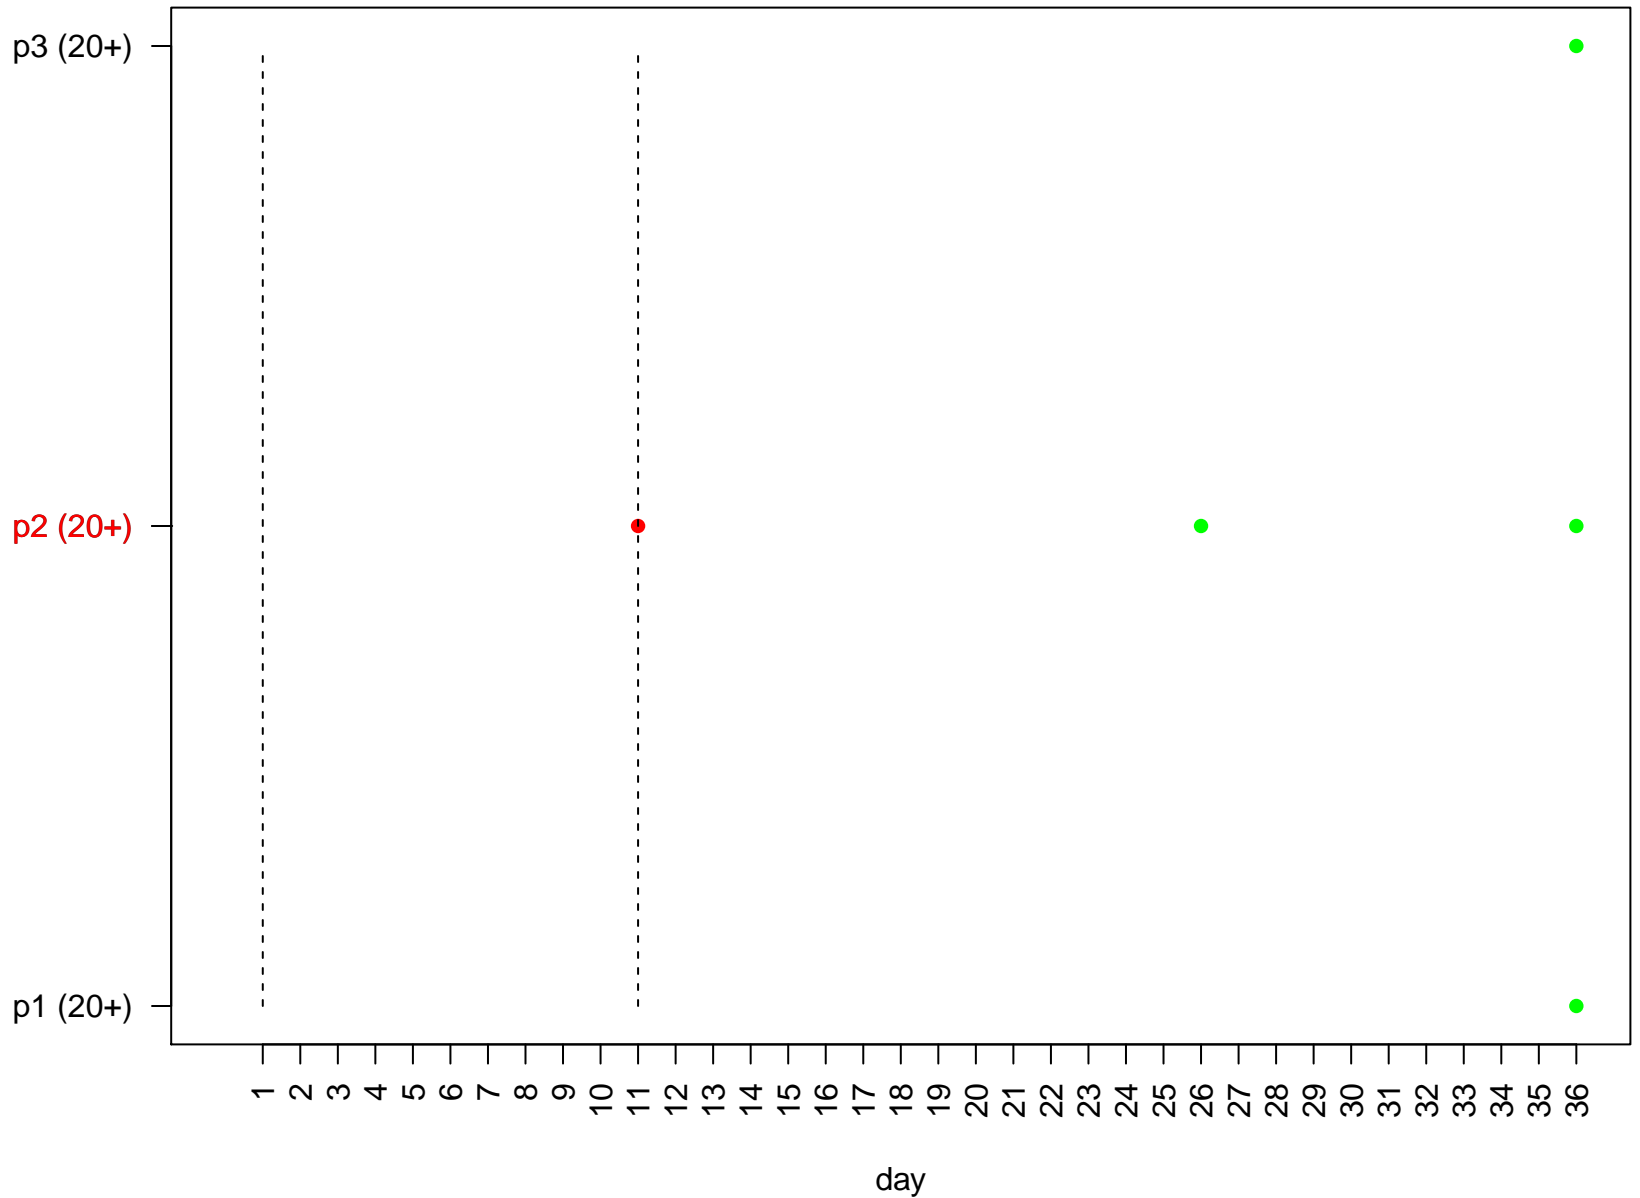

# Household 558

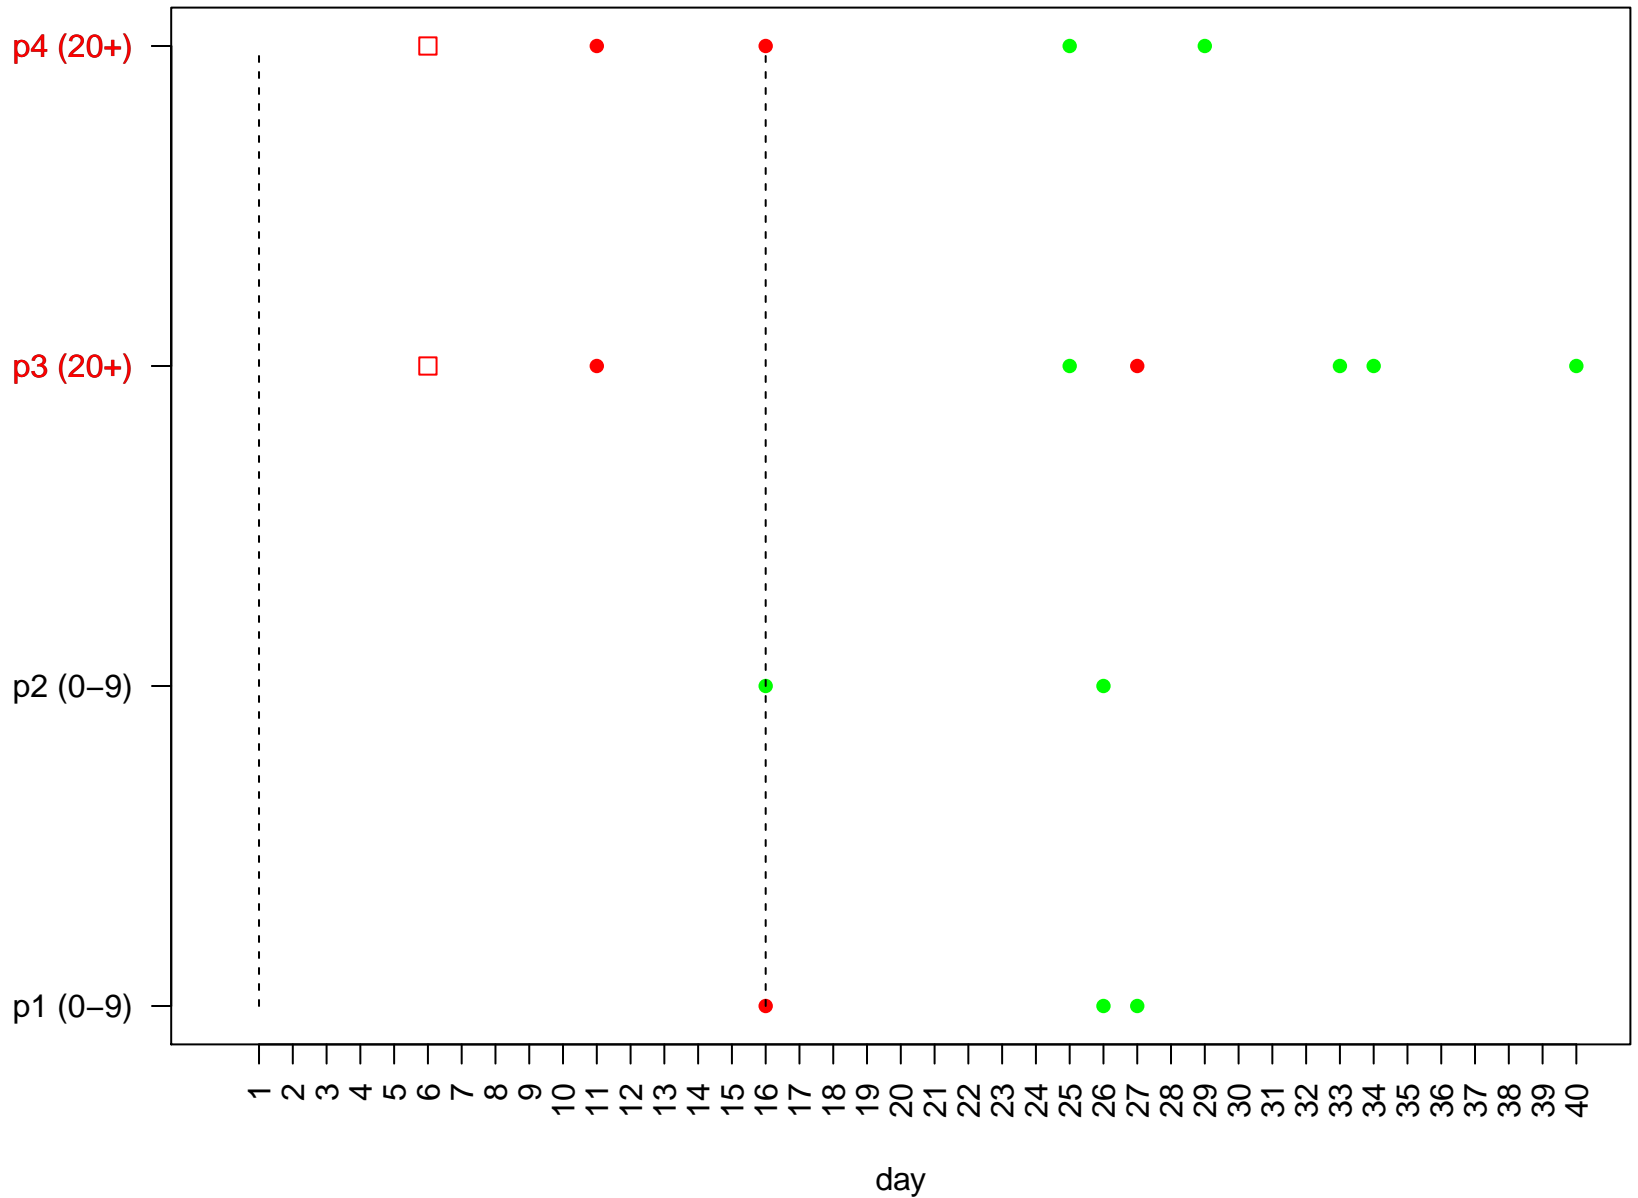

# Household 559

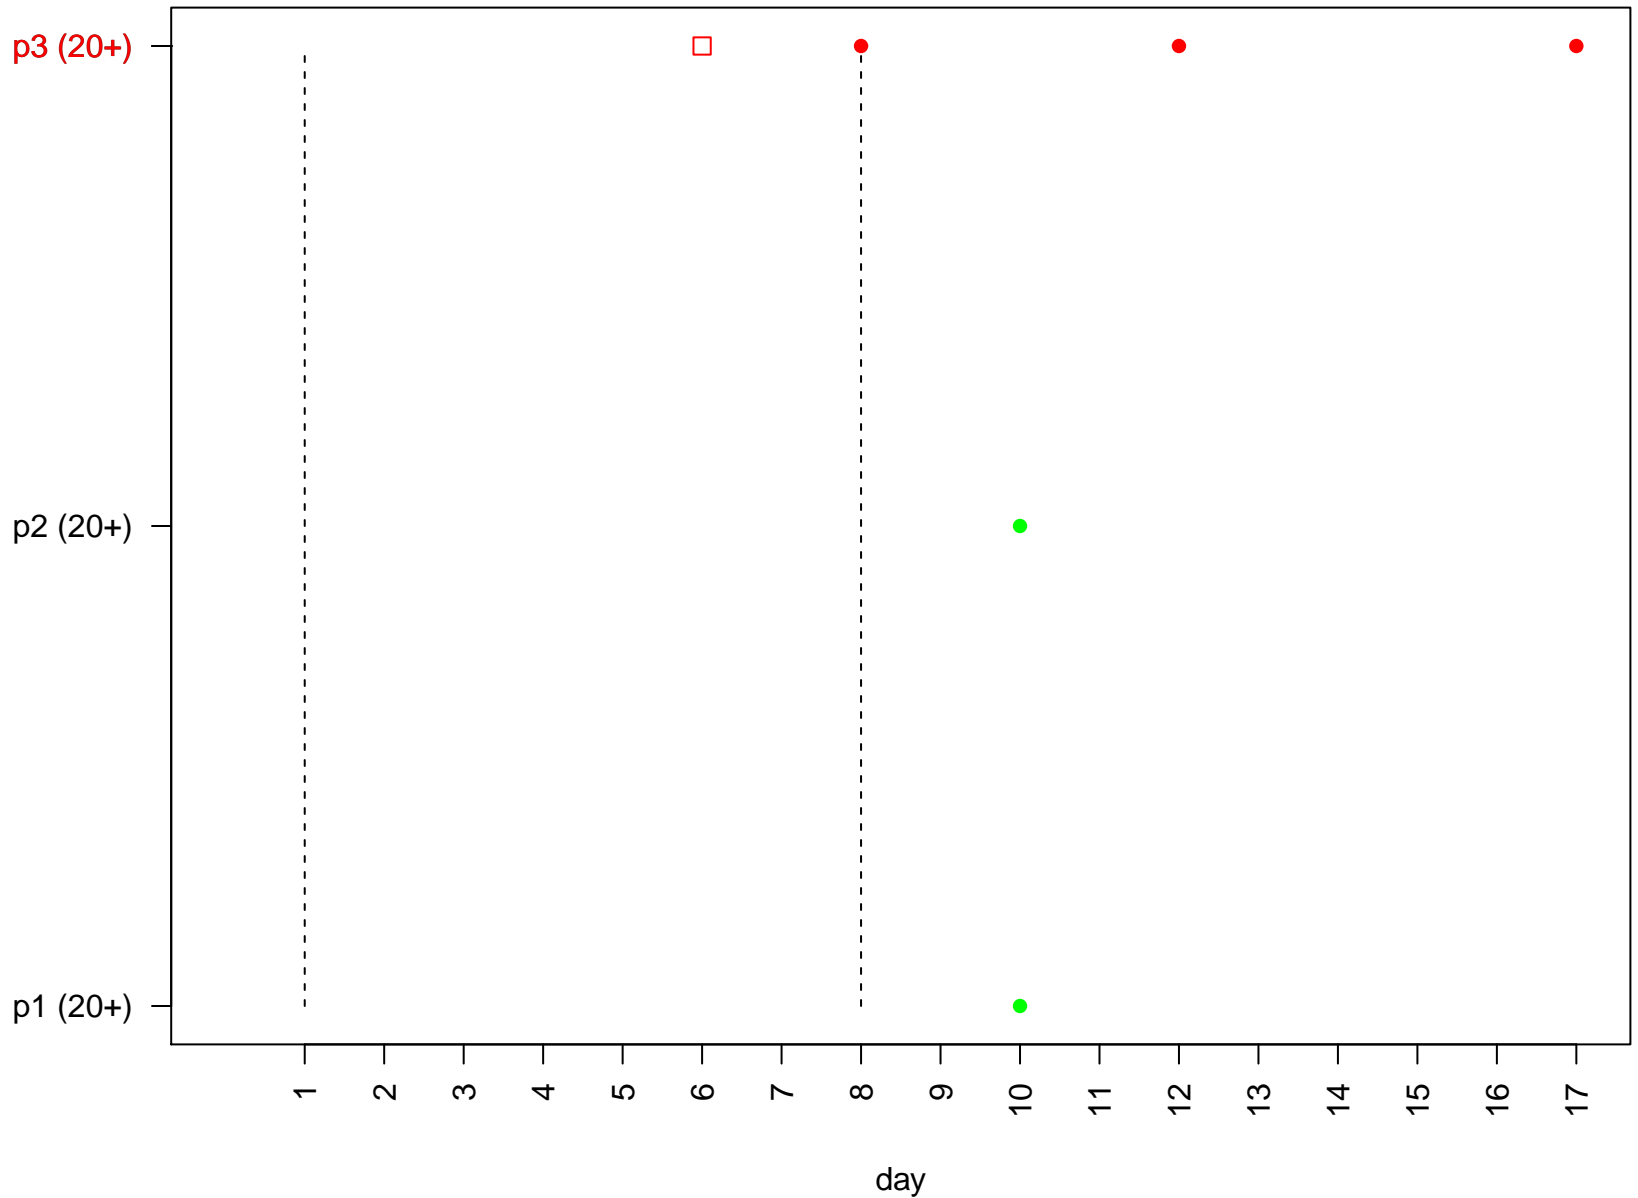

# Household 560

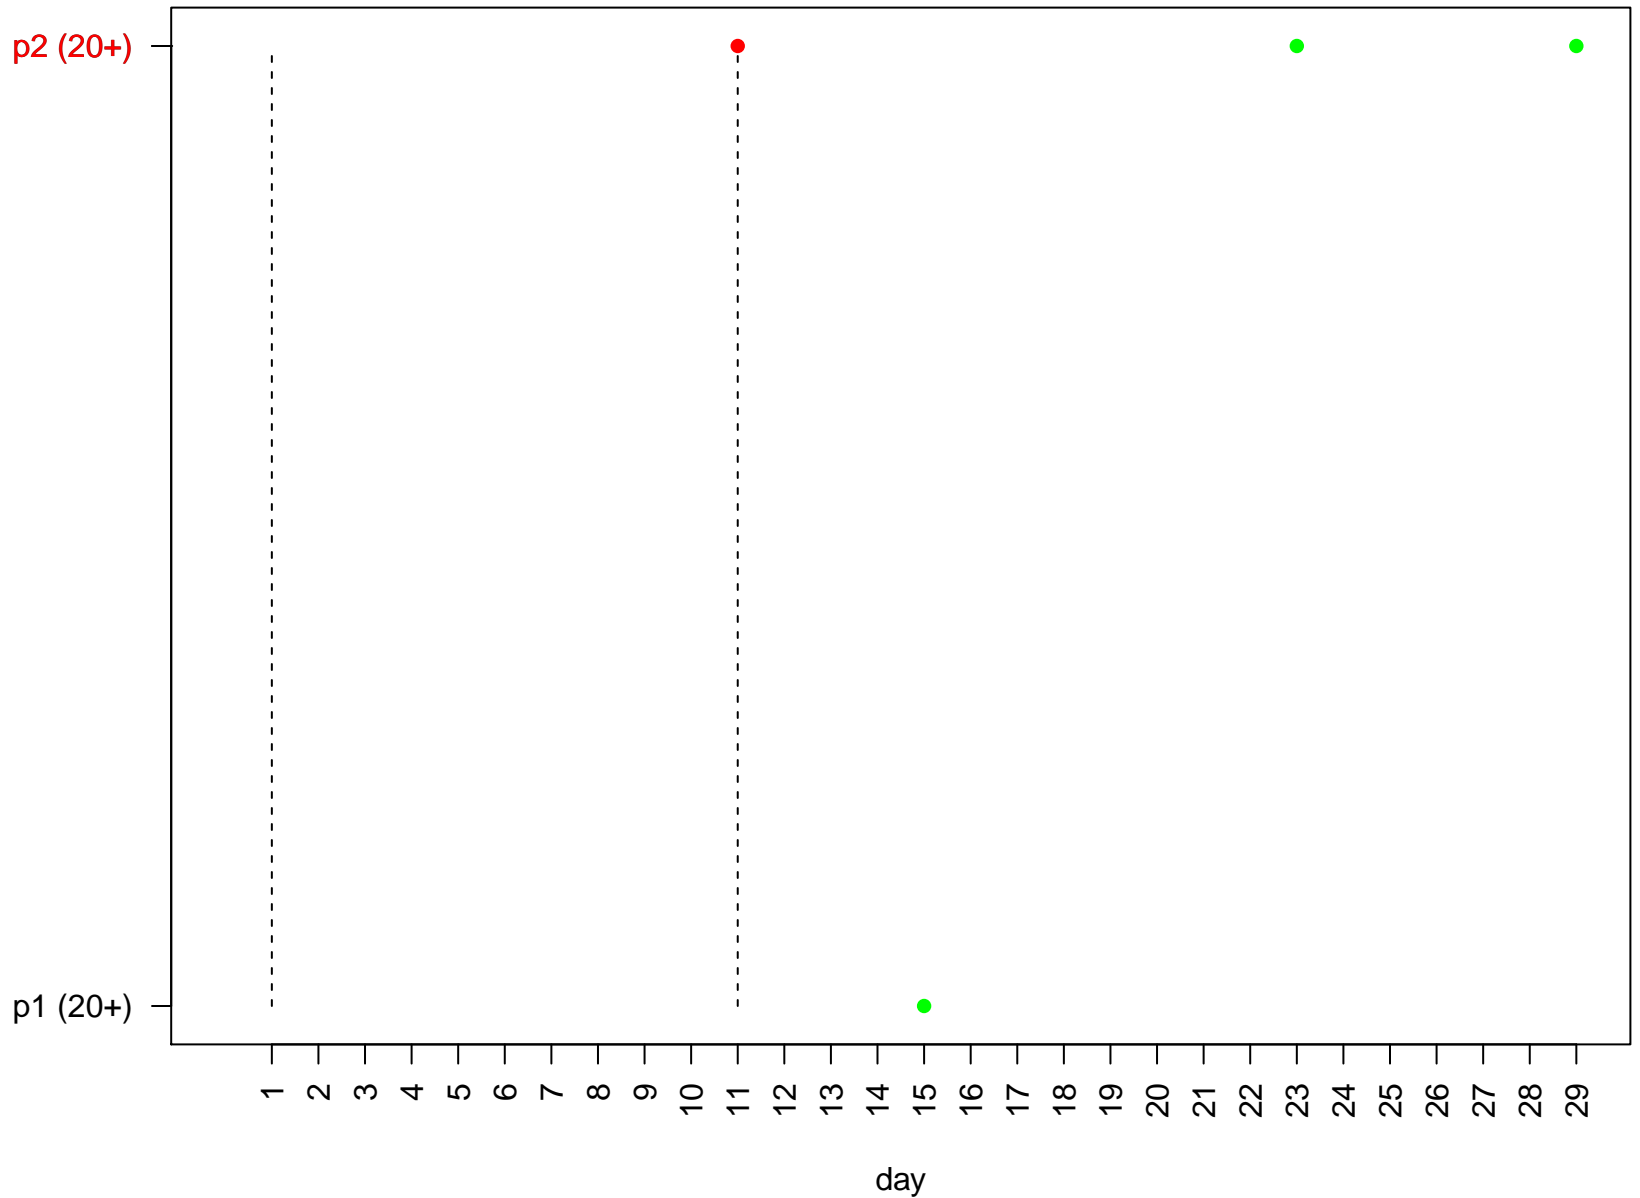

# Household 561

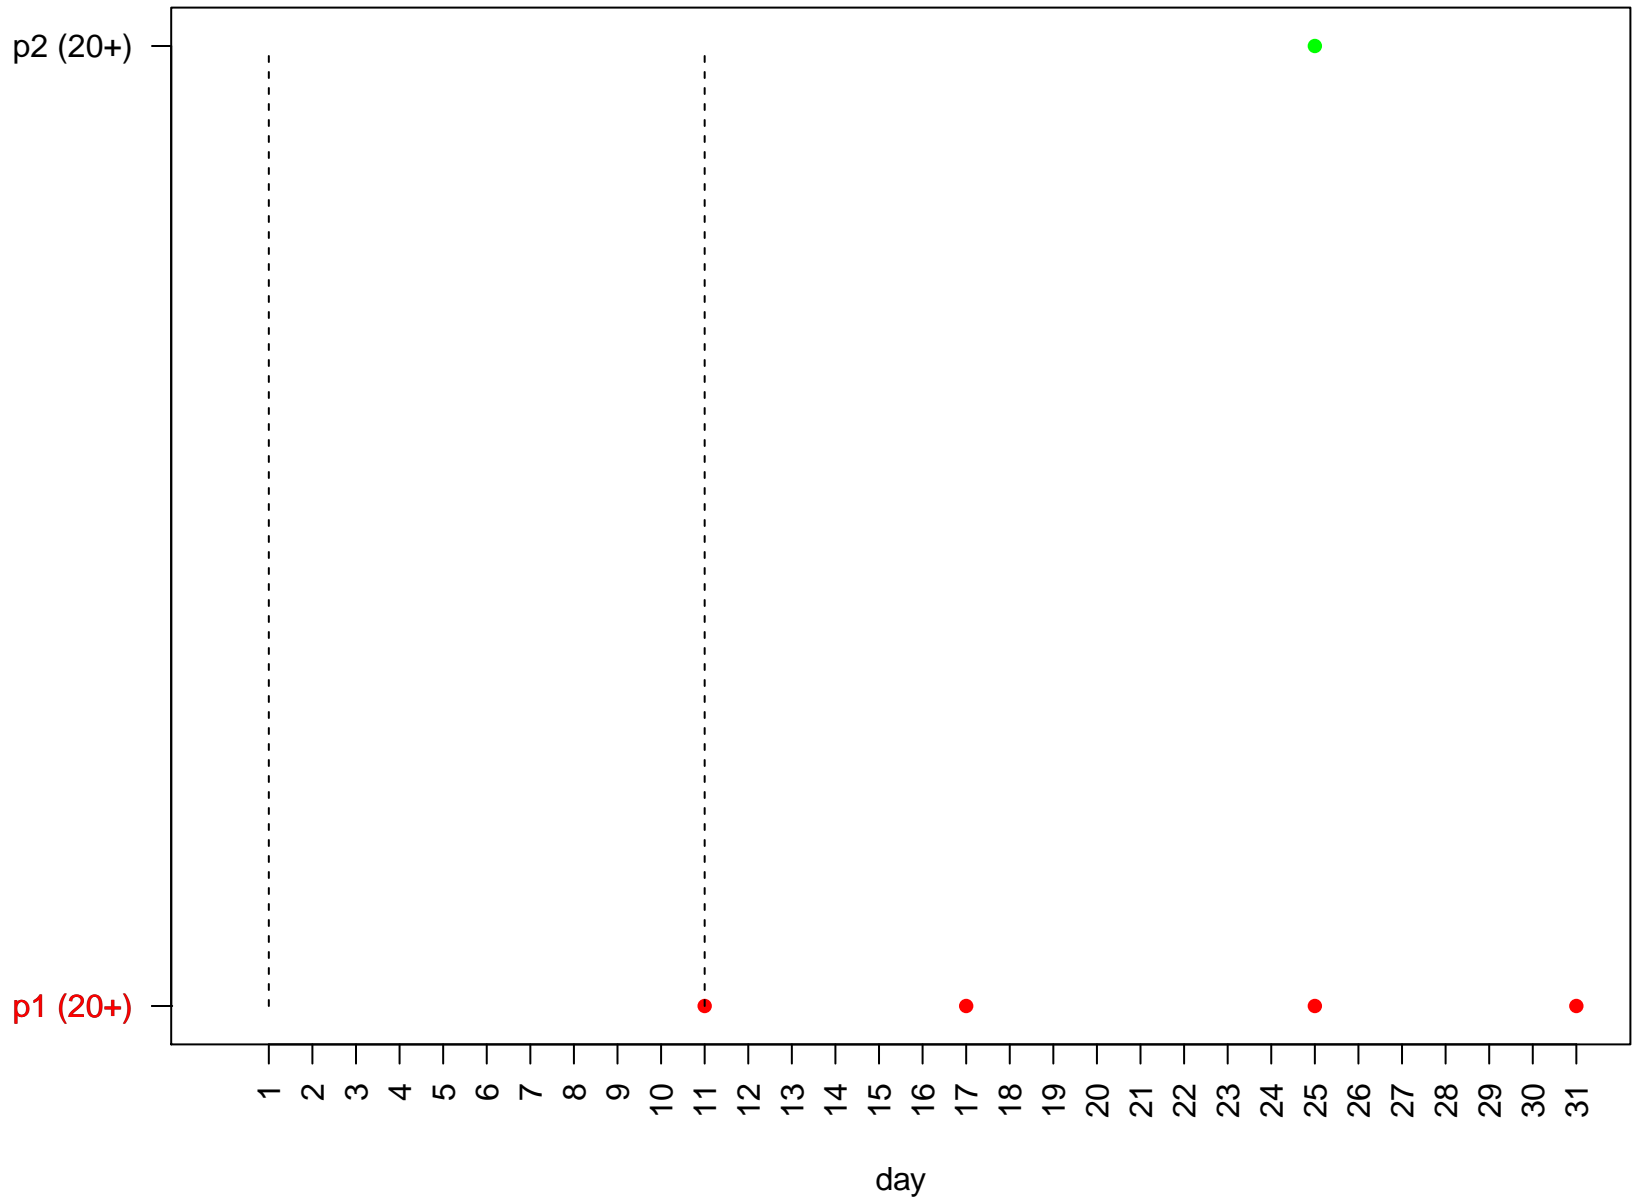



# Household 562

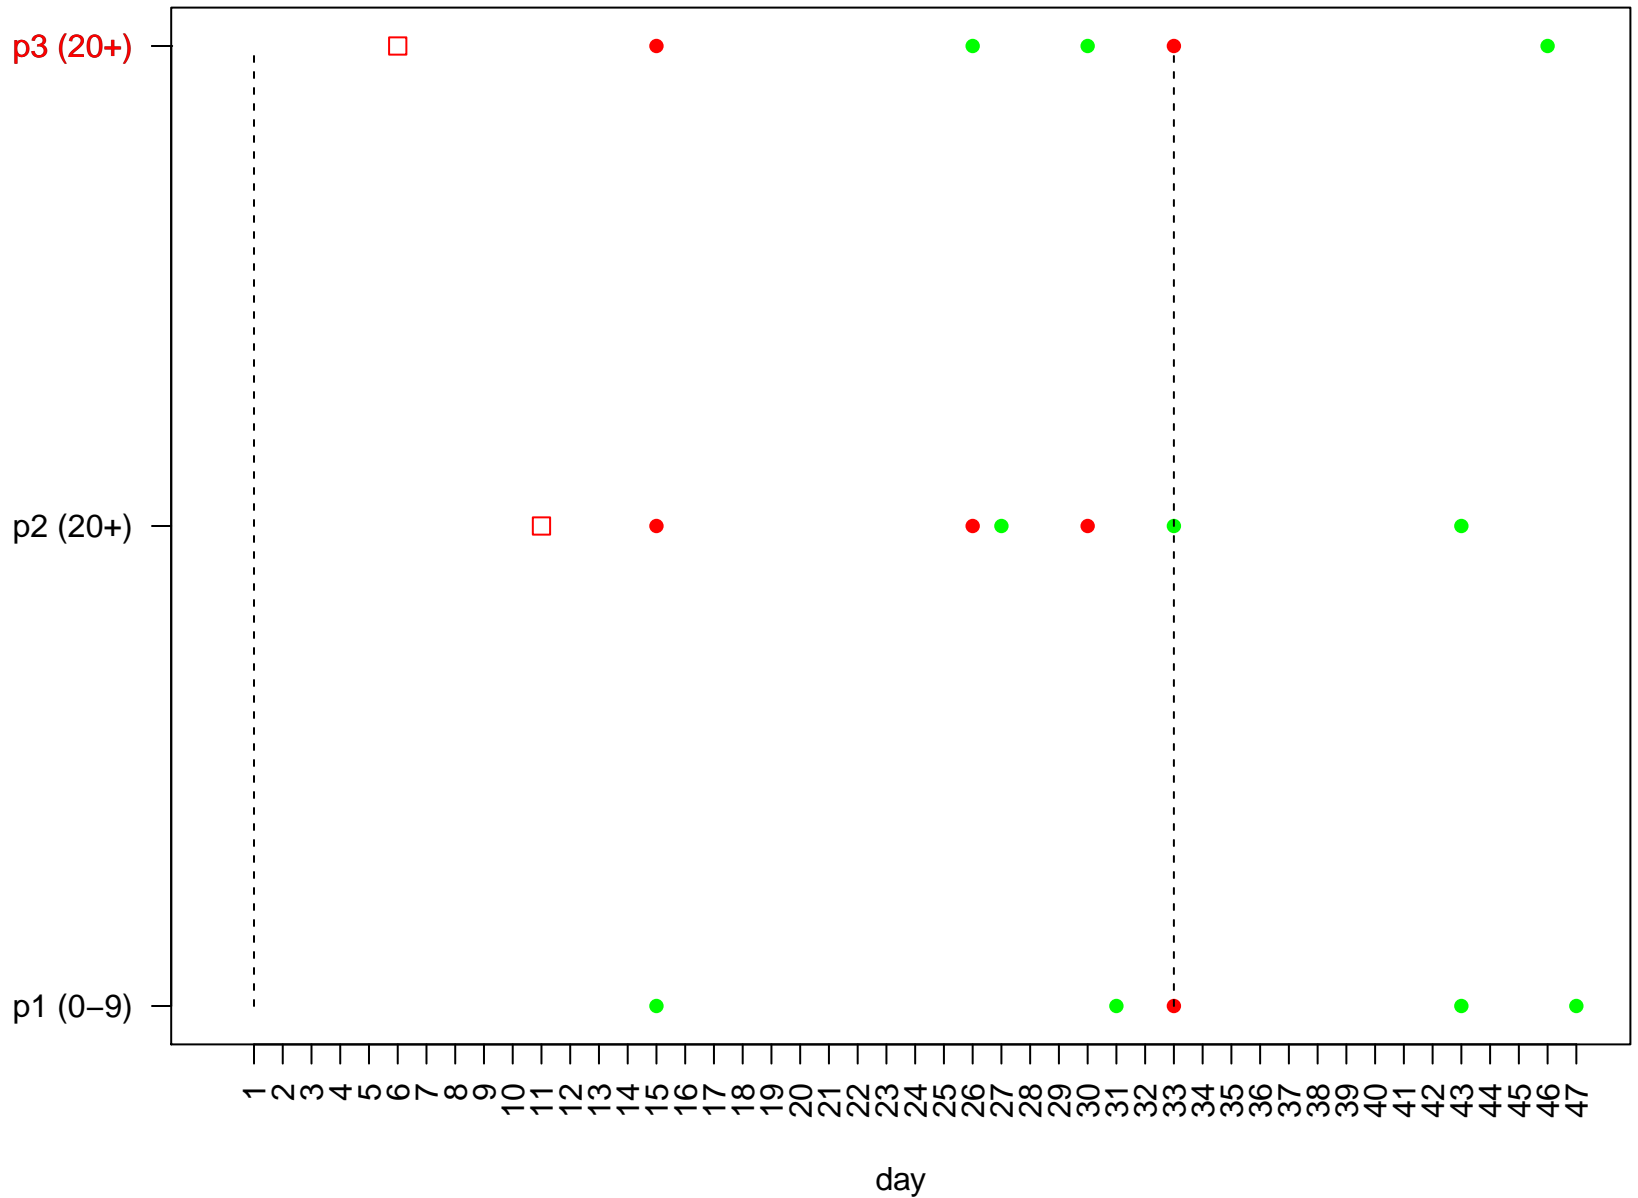

# Household 563

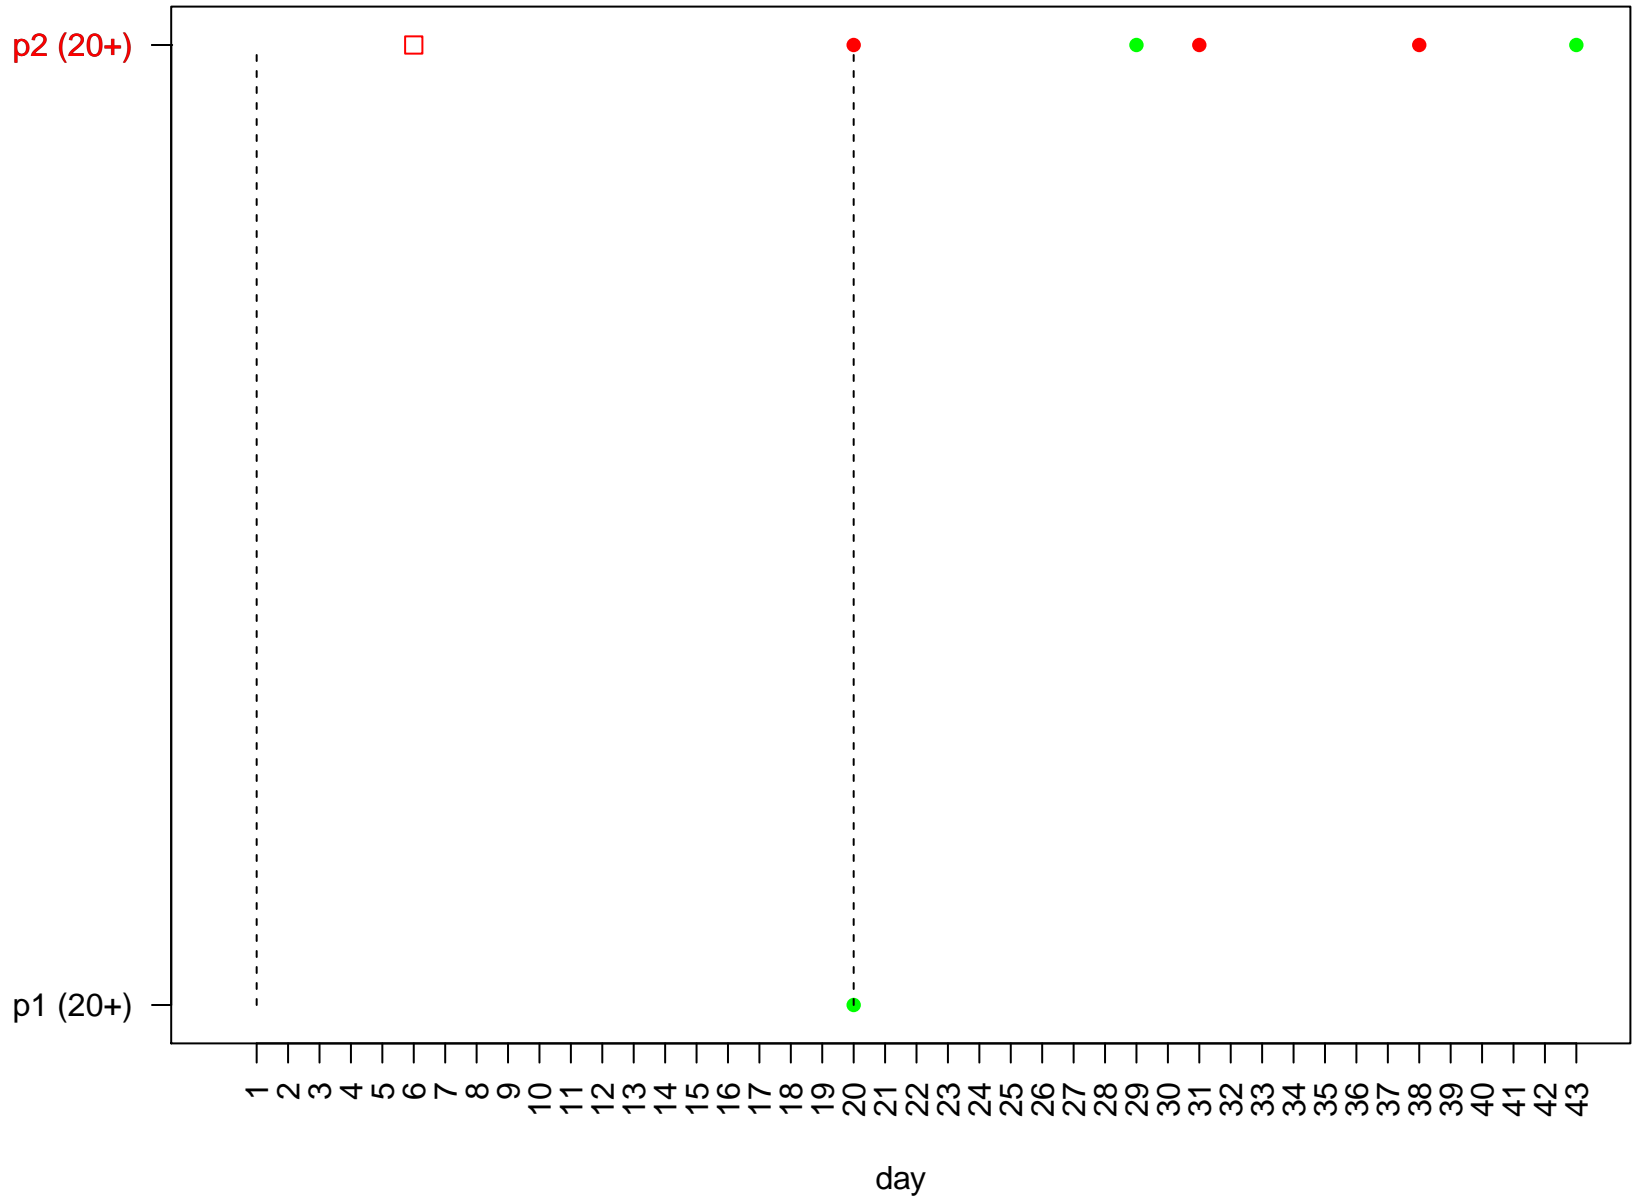

# Household 564

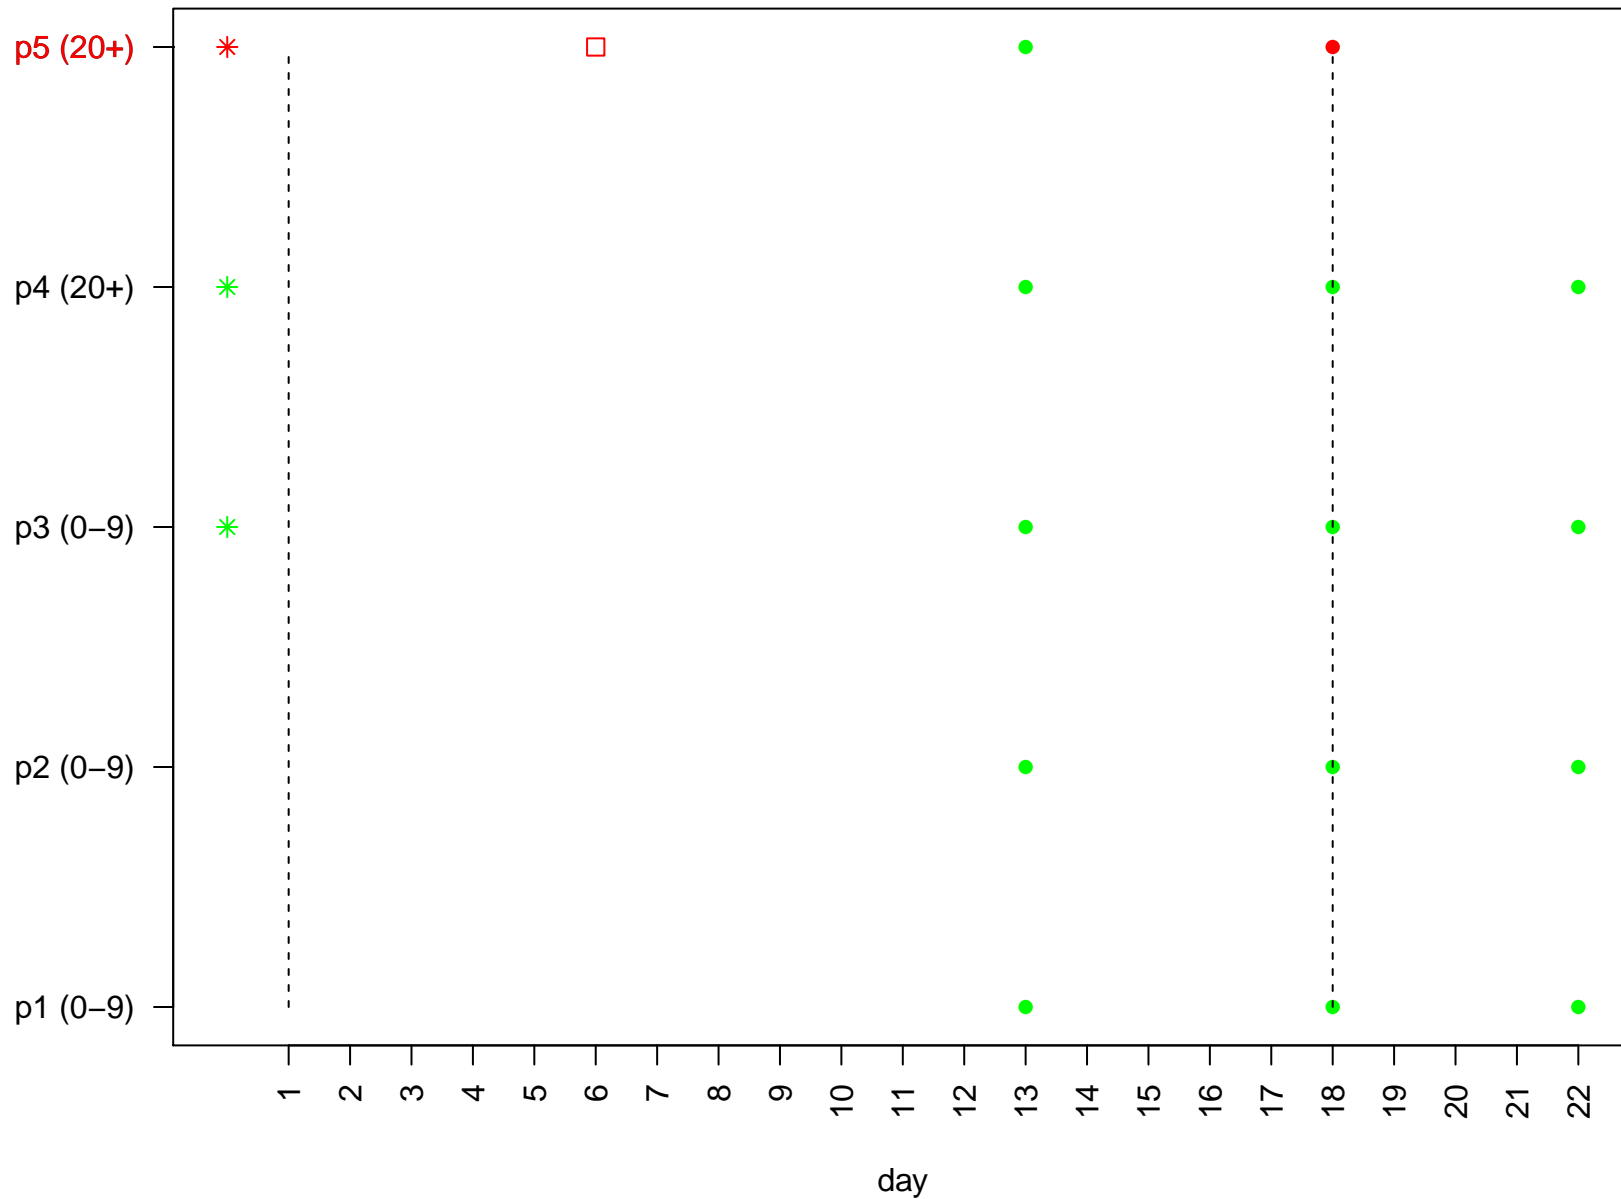

# Household 565

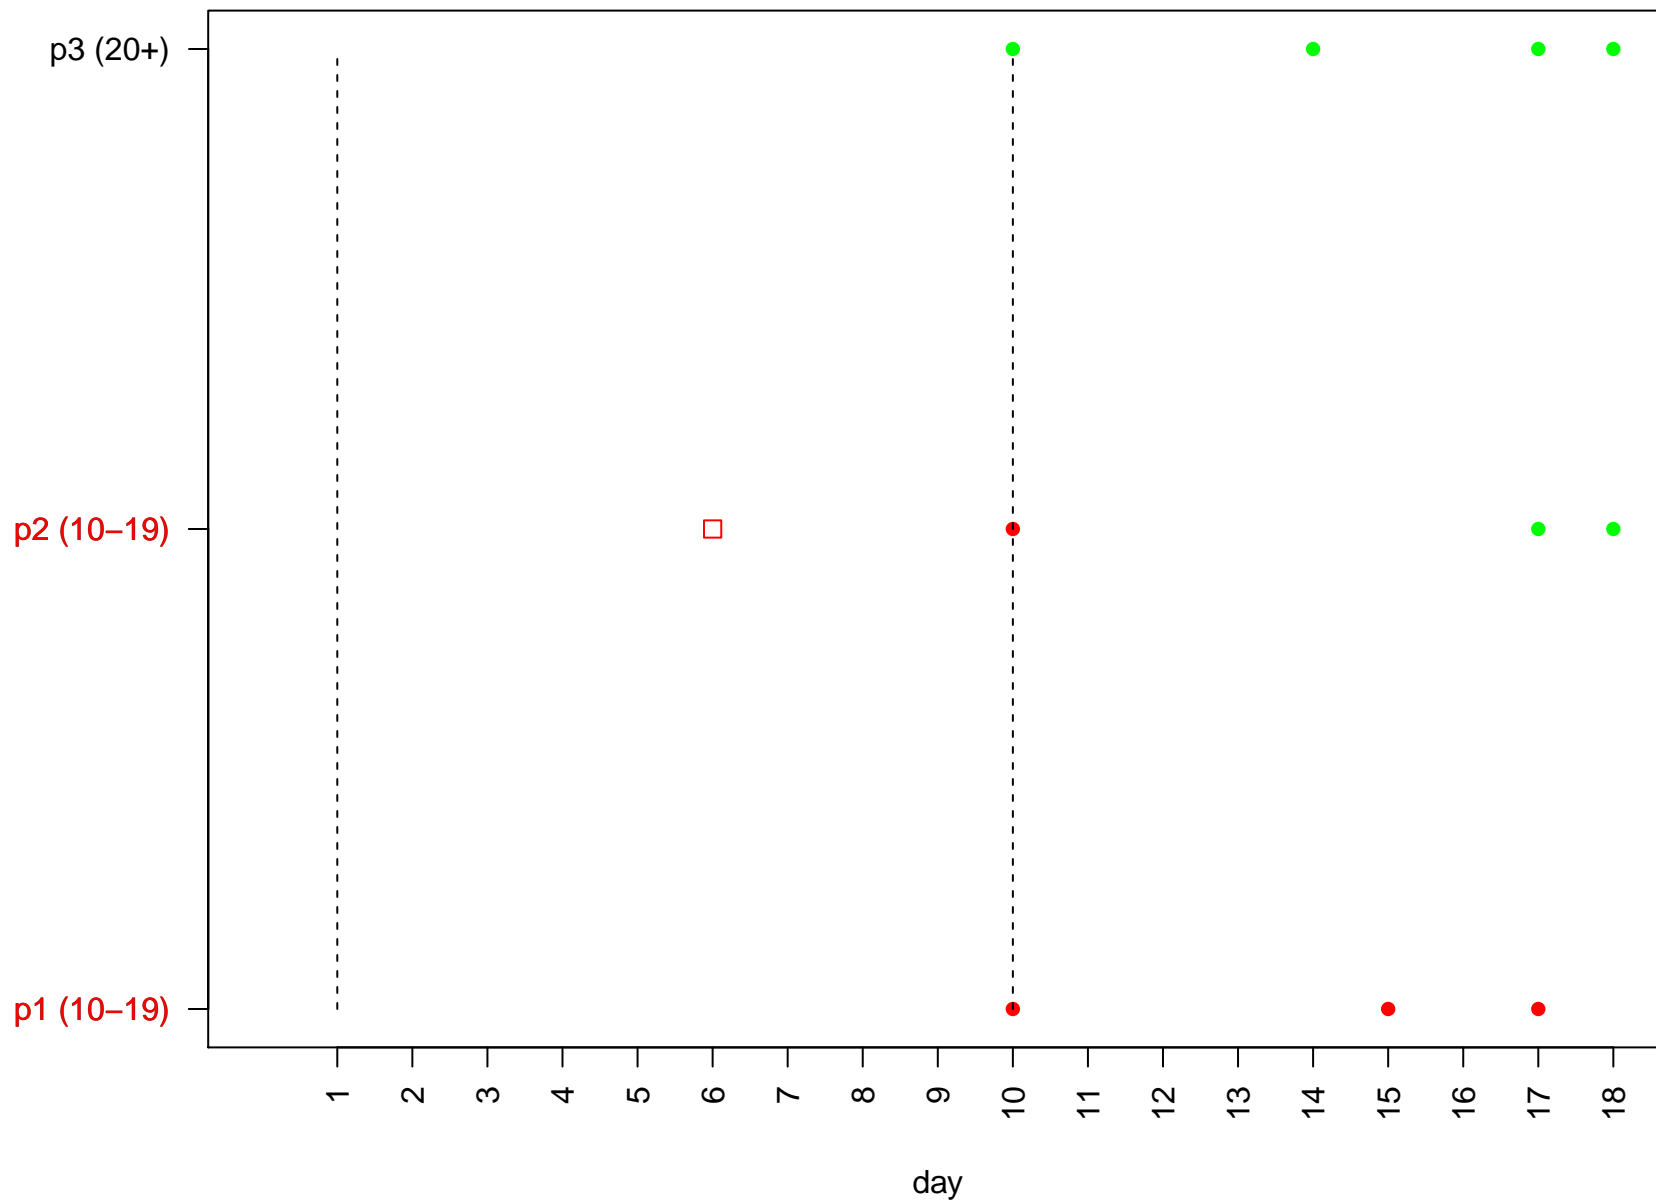

# Household 566

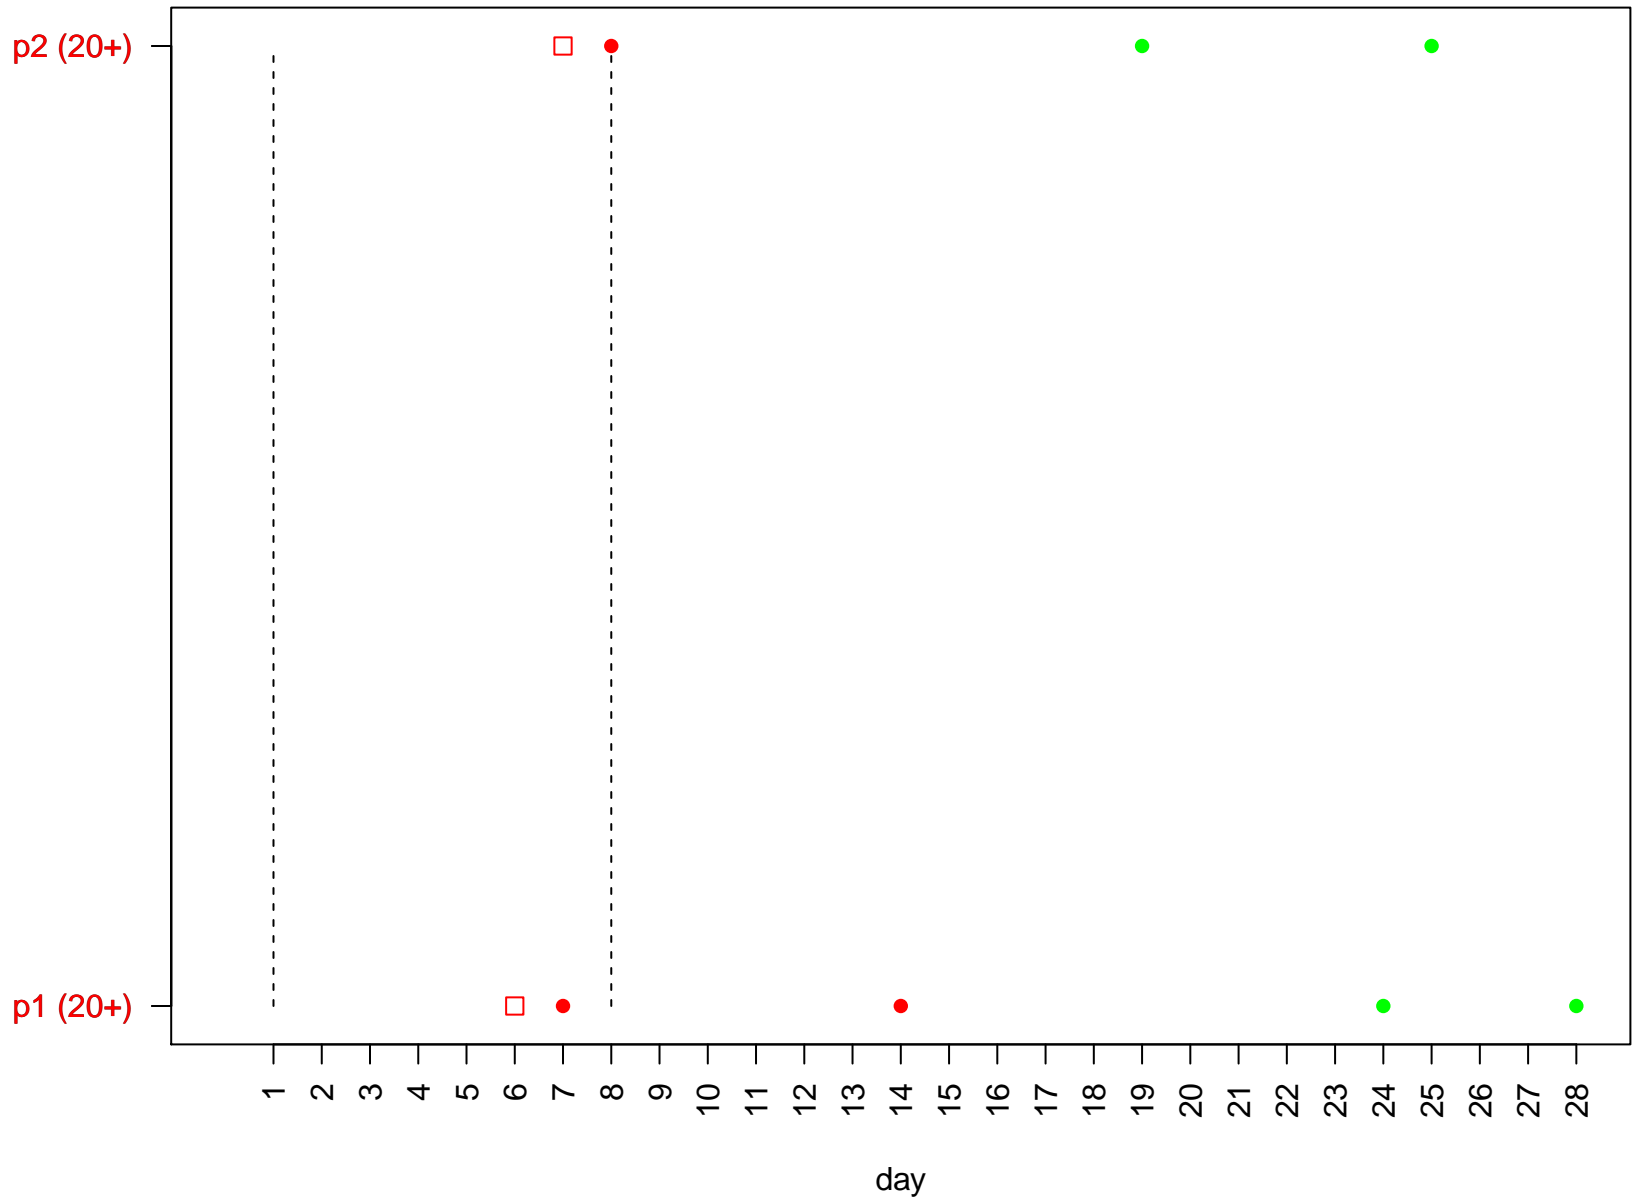

# Household 567

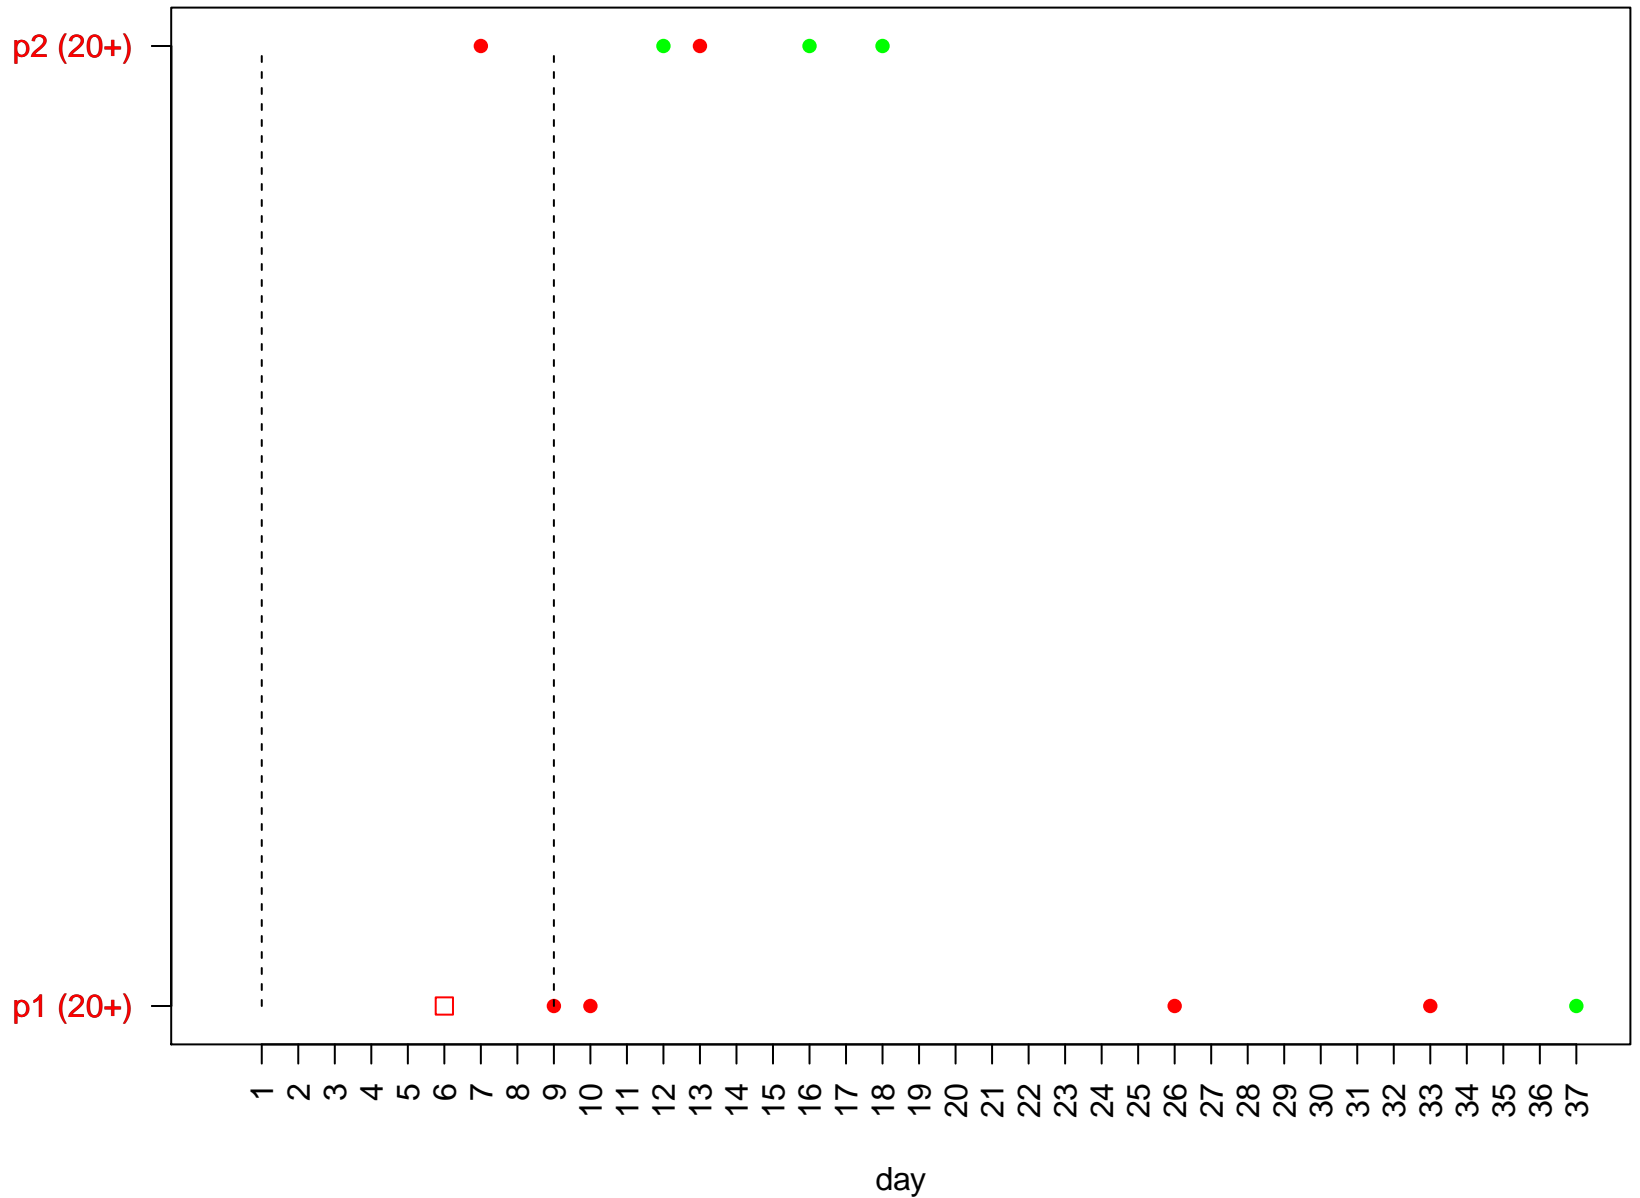

# Household 568

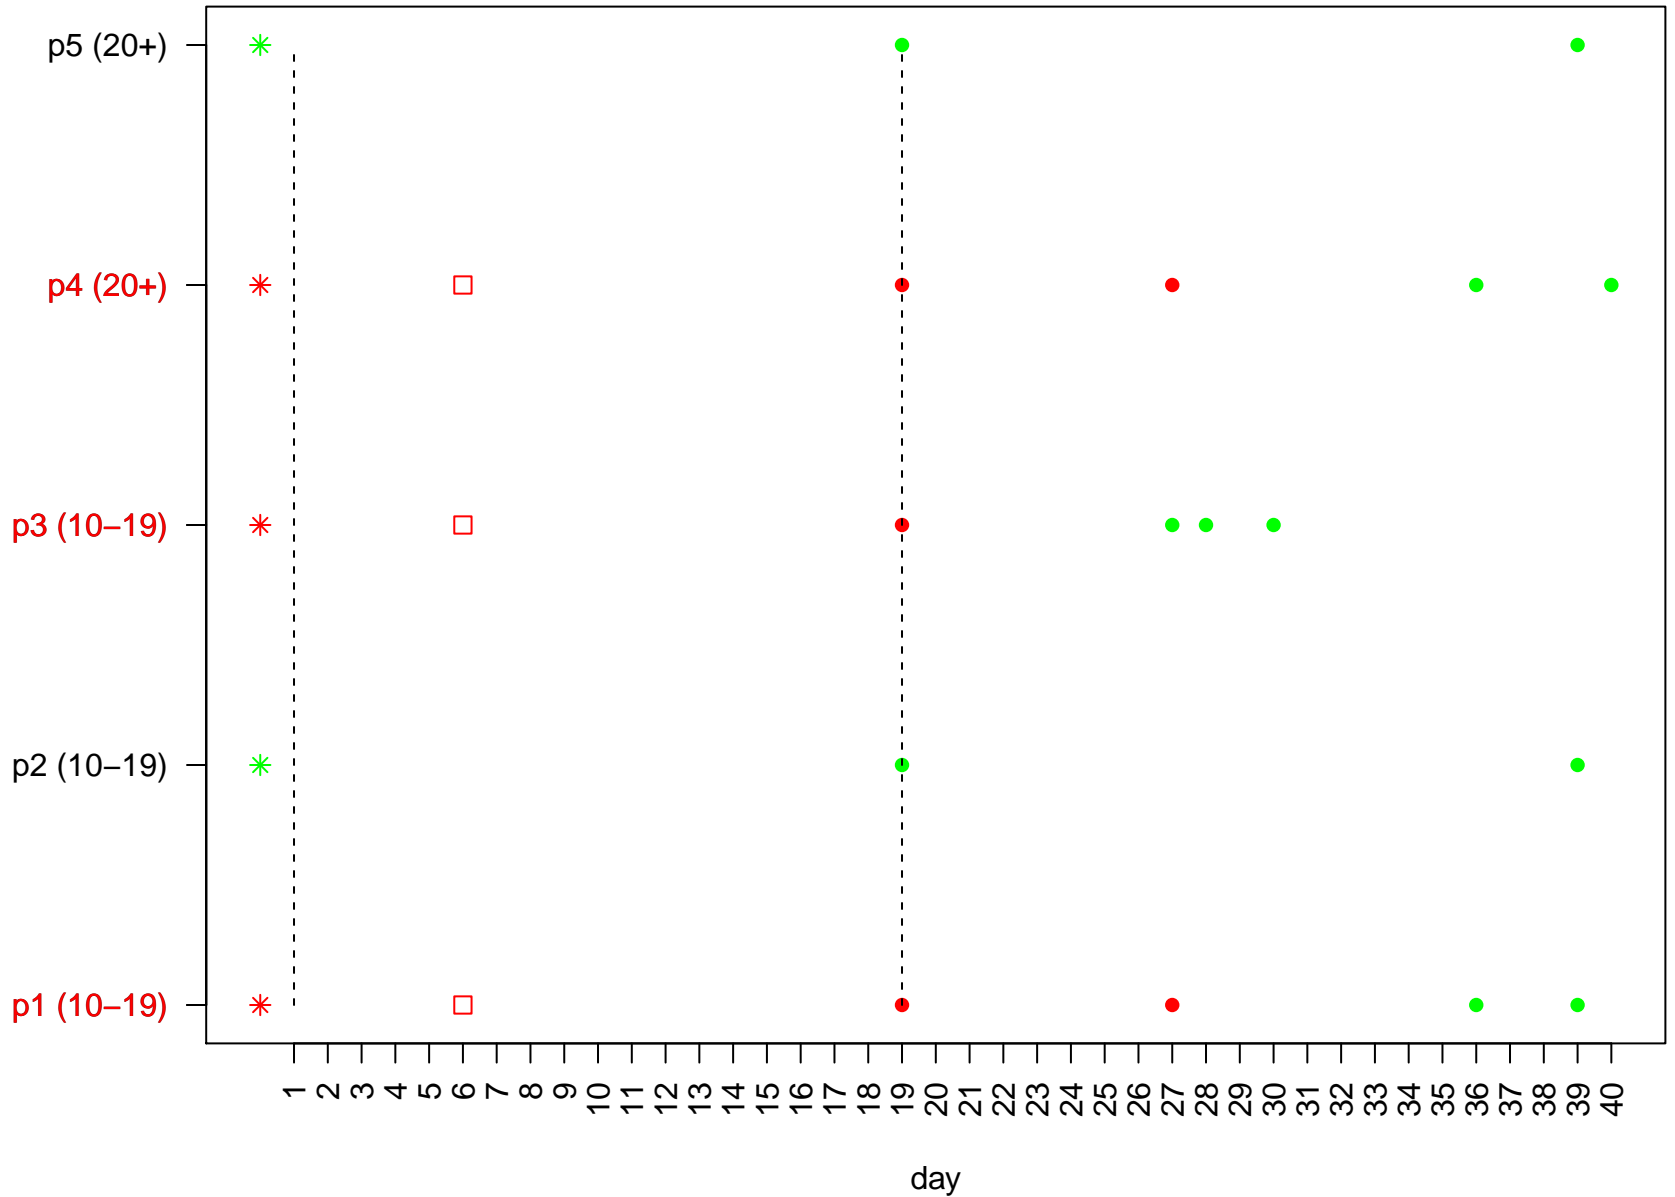

# Household 569

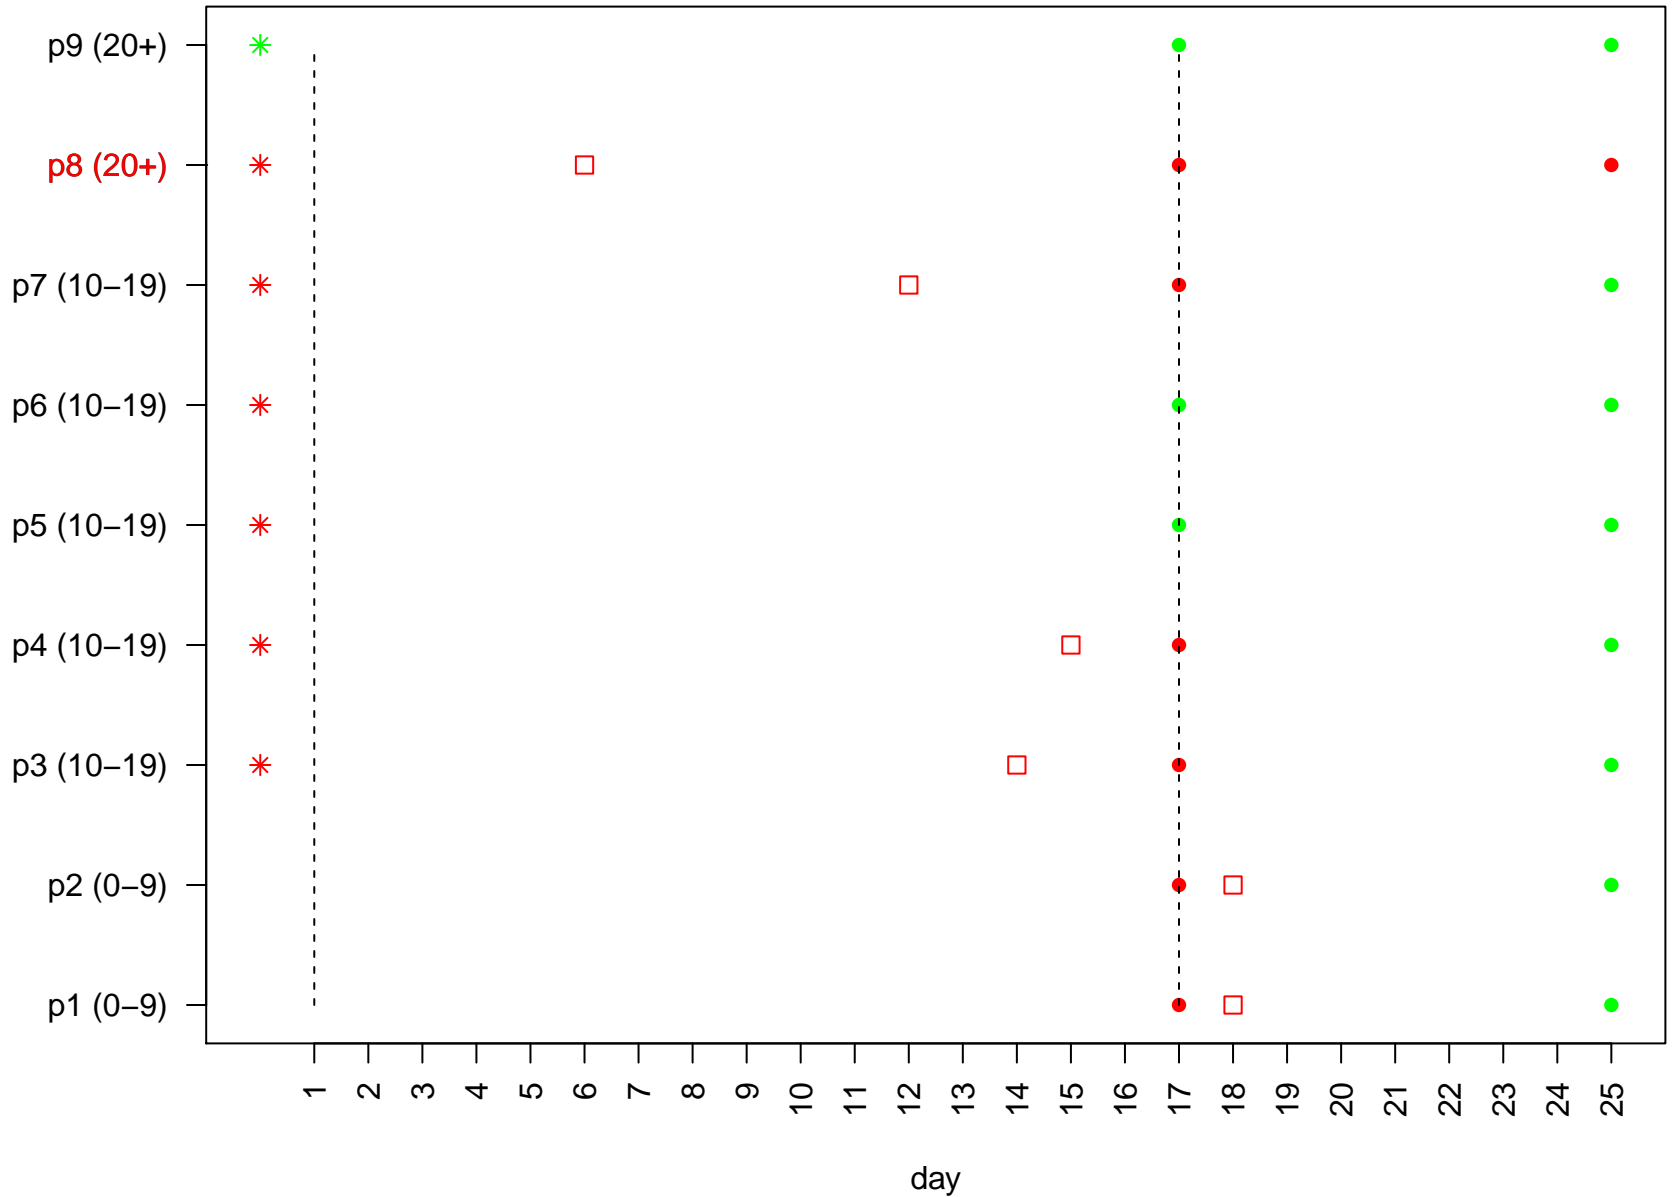



# Household 570

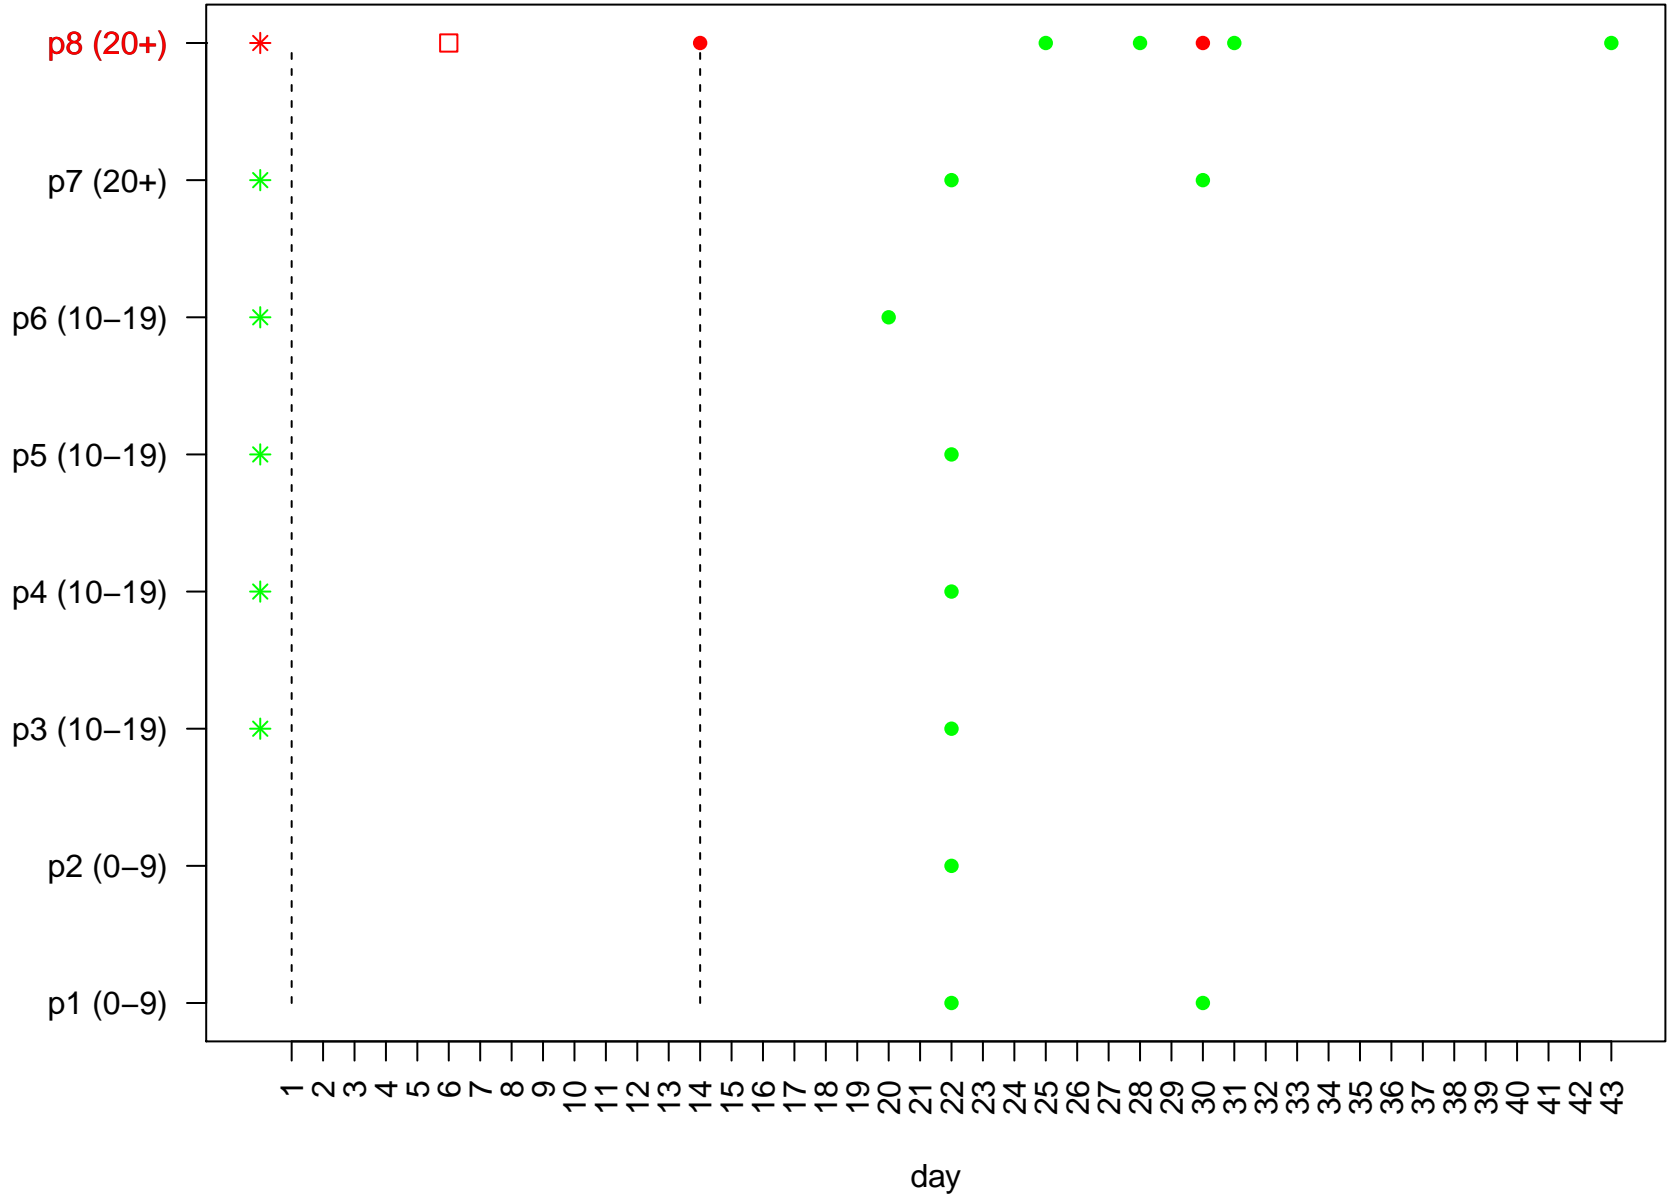

# Household 571

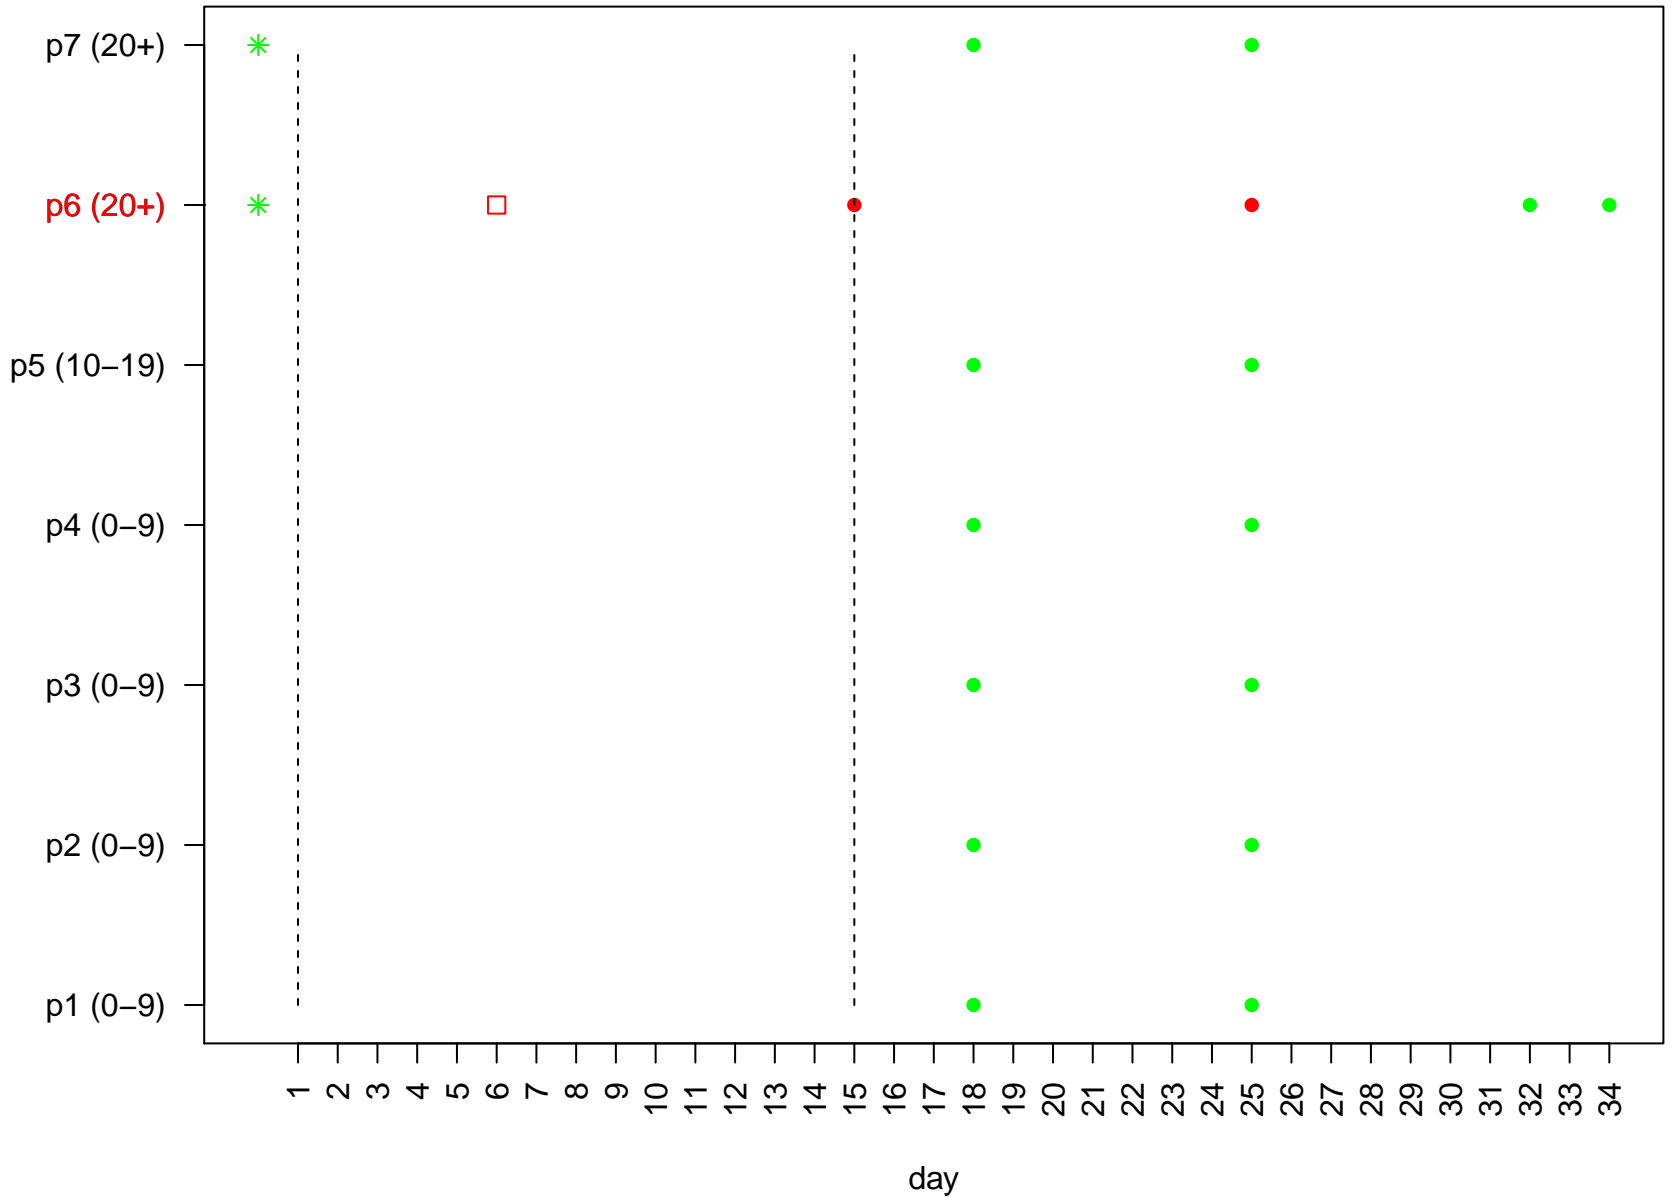

# Household 572

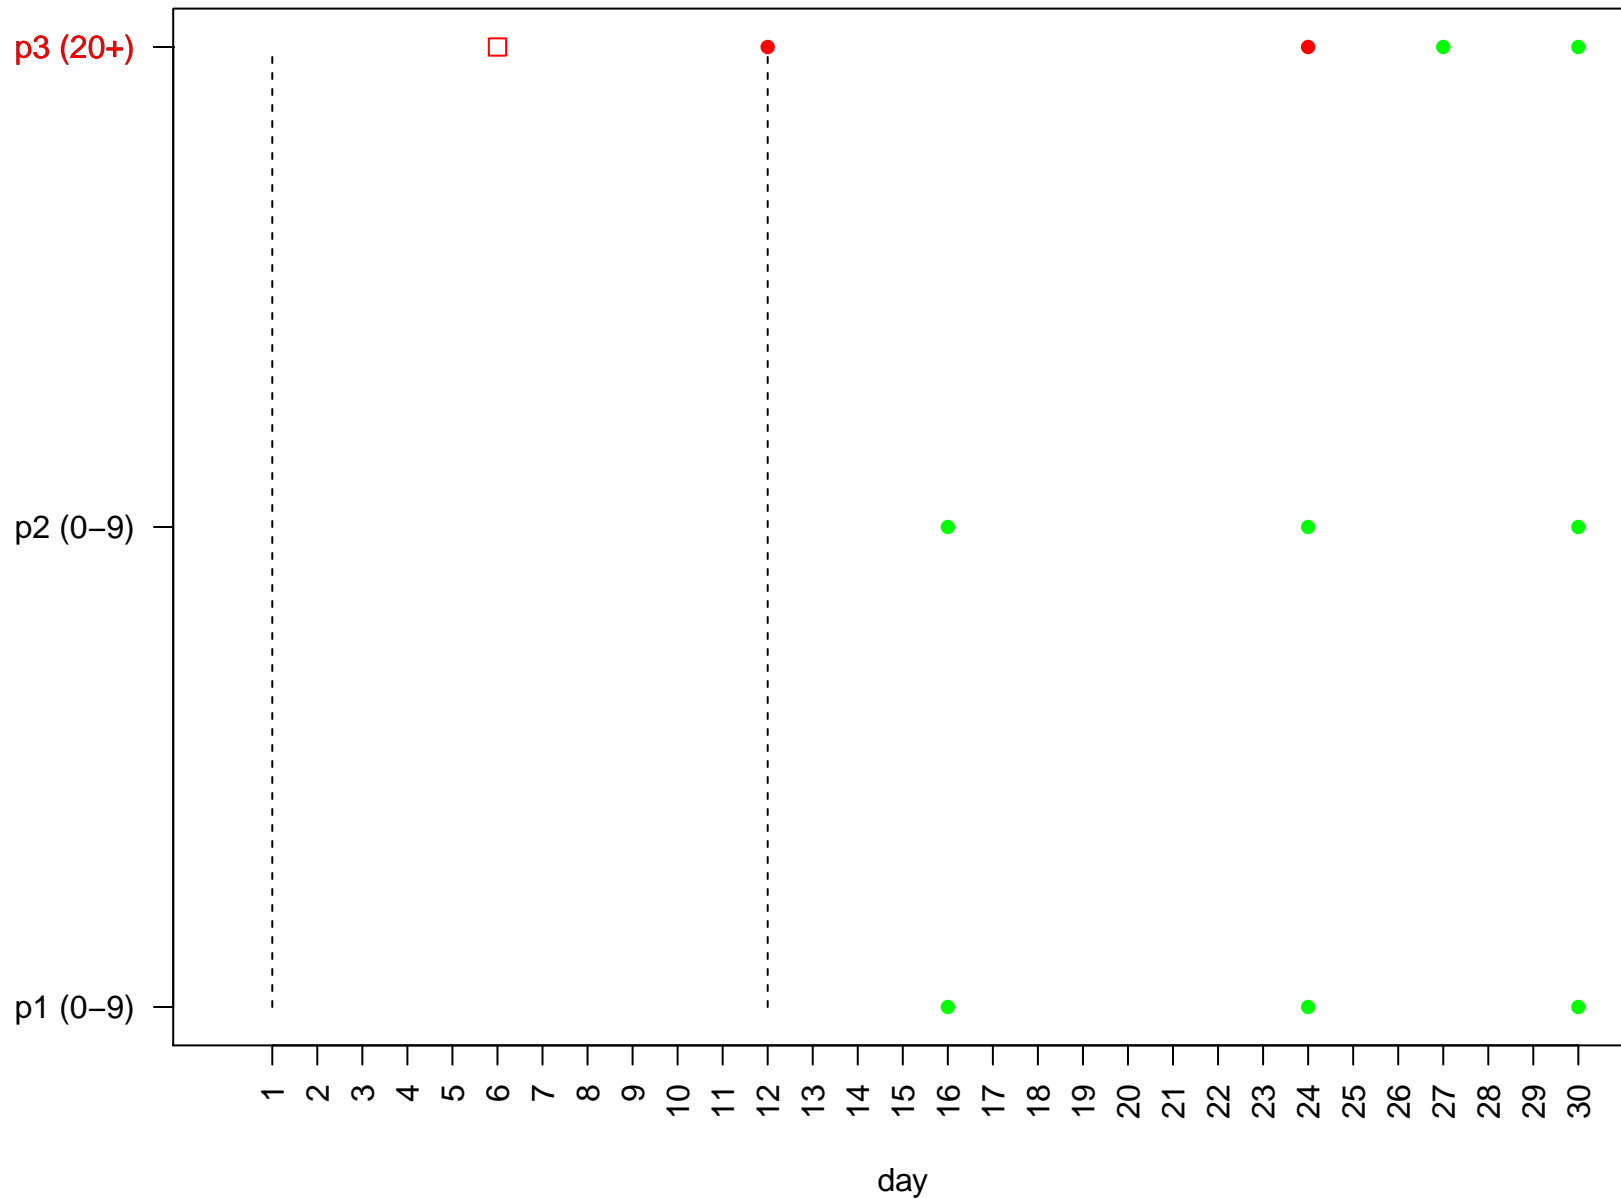

# Household 573

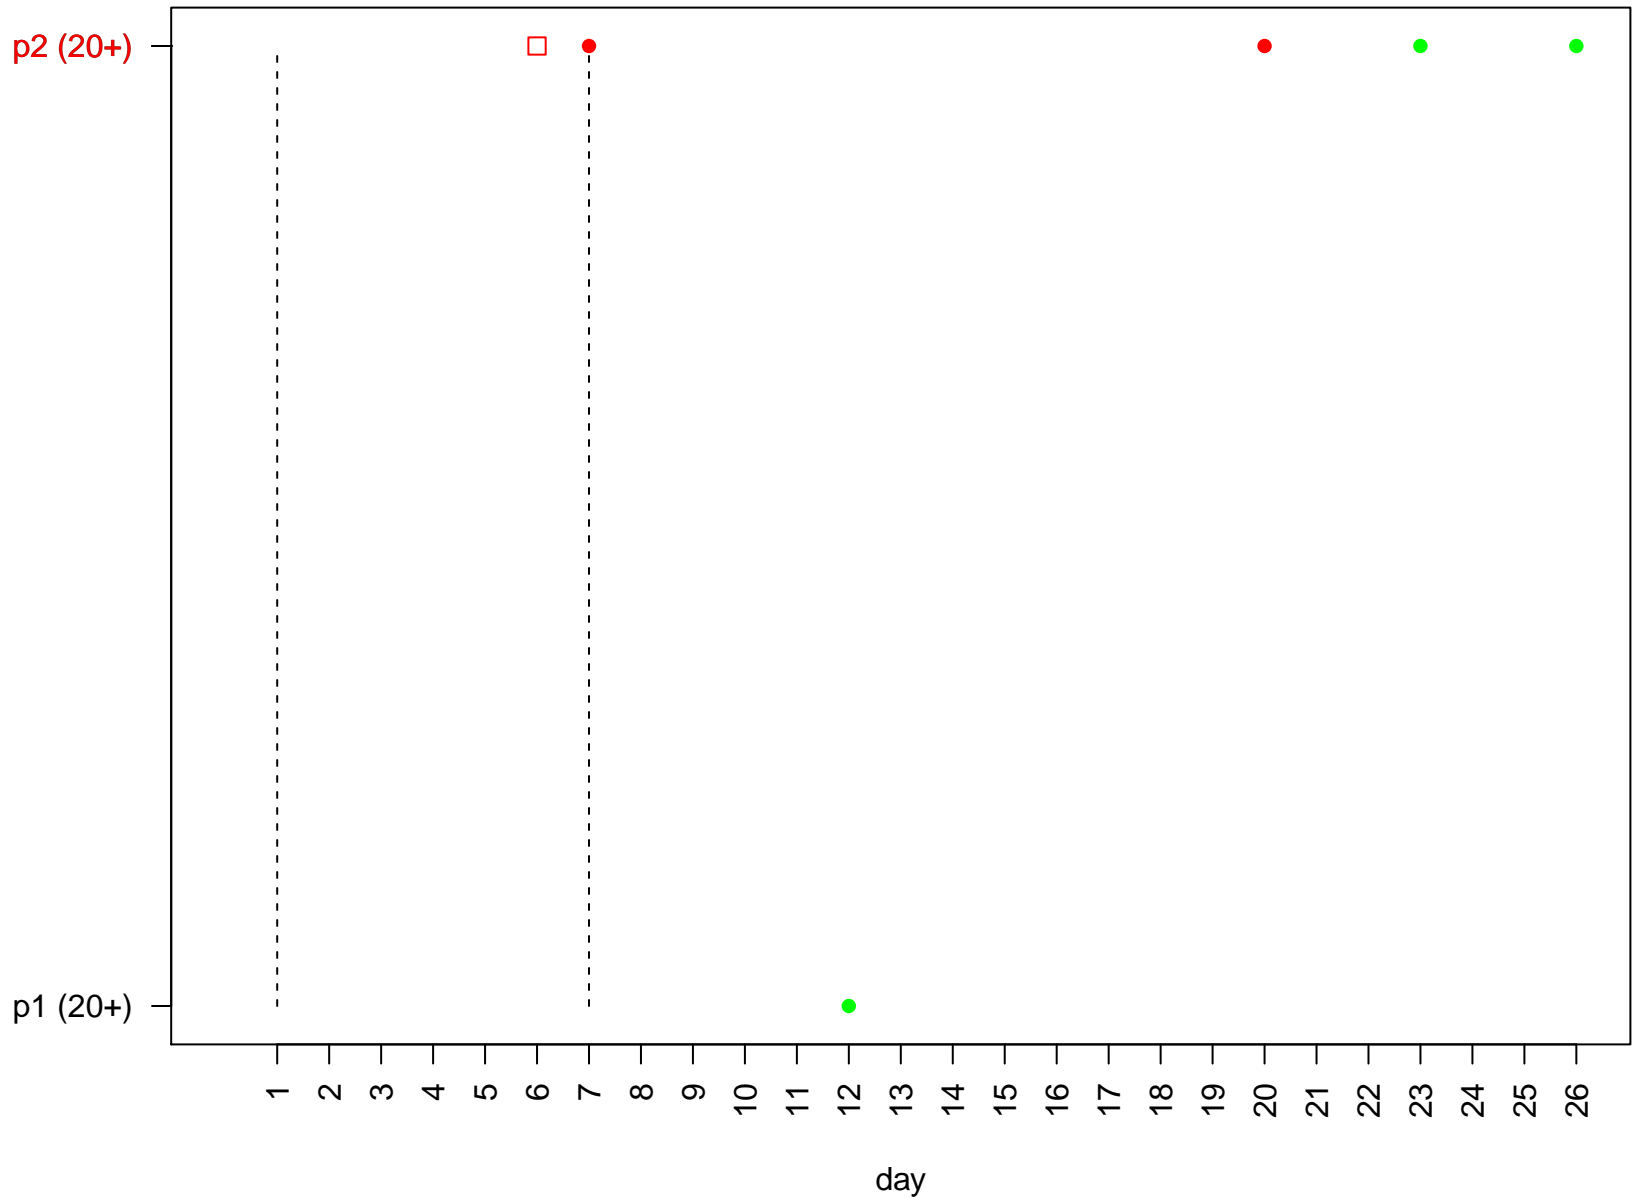

# Household 574

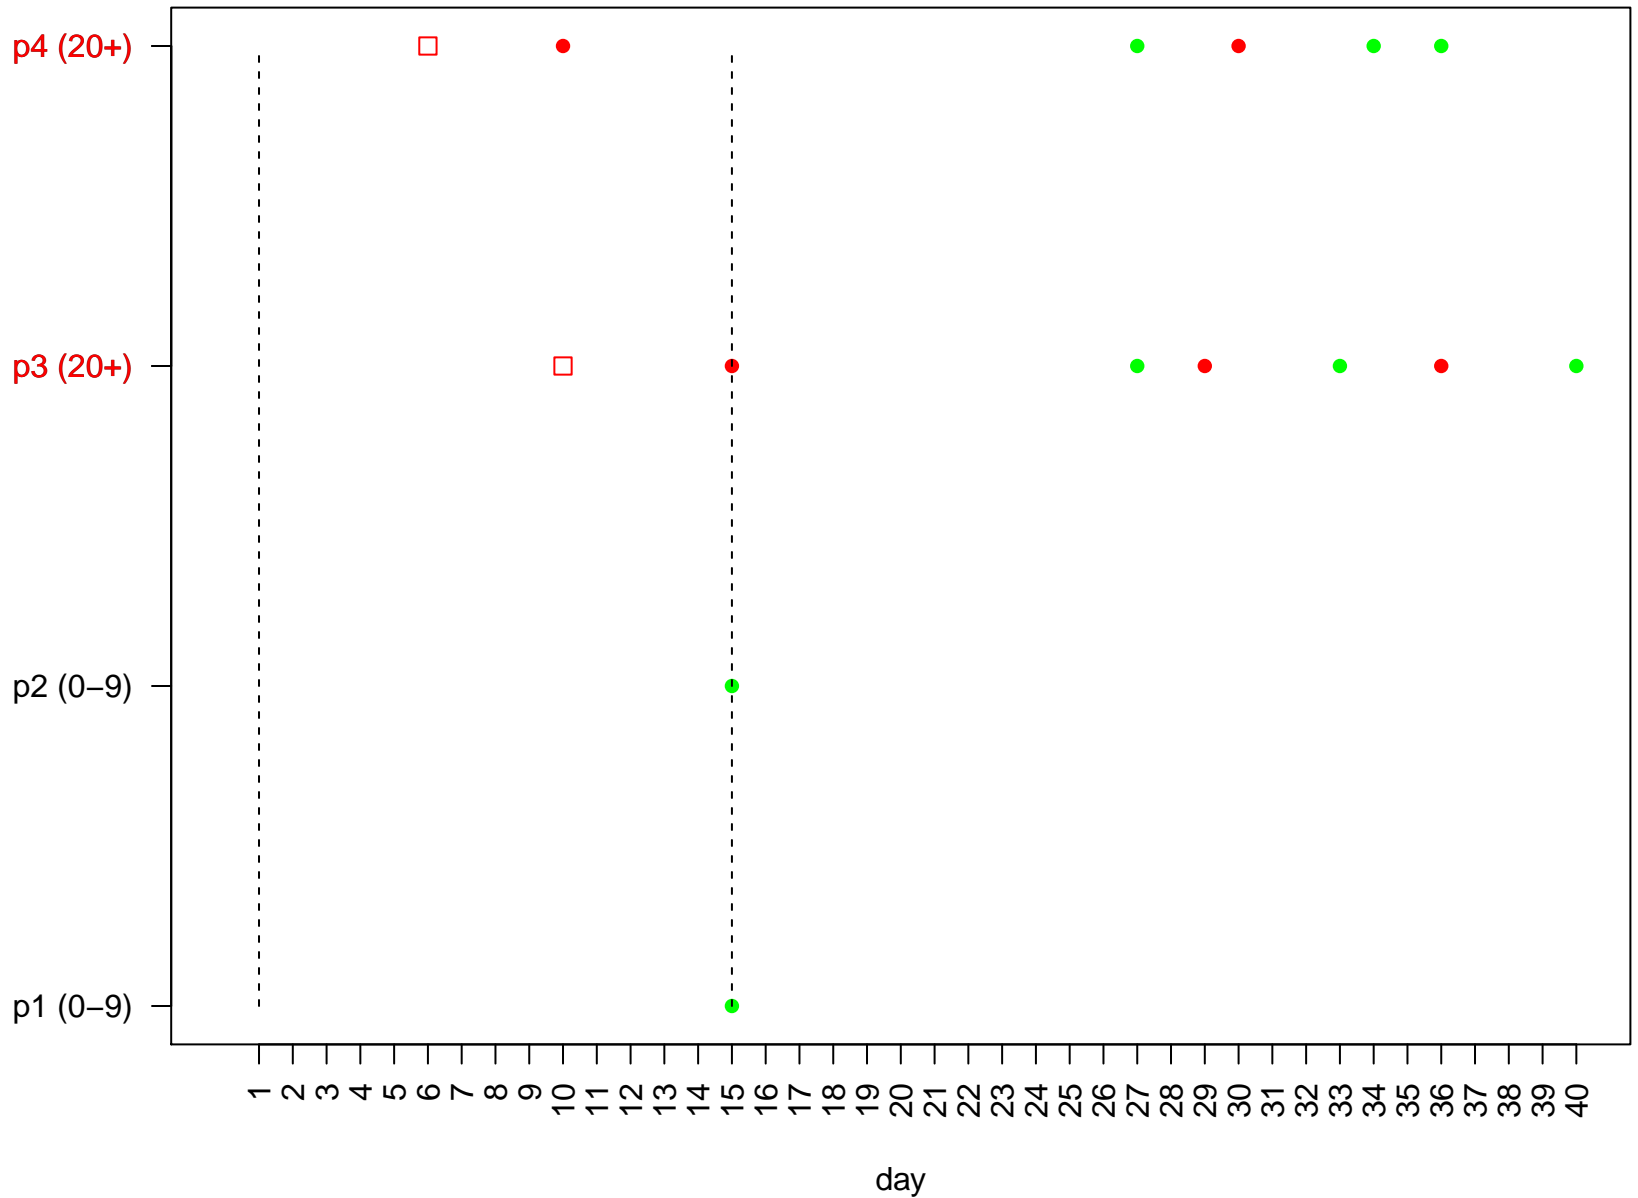

# Household 575

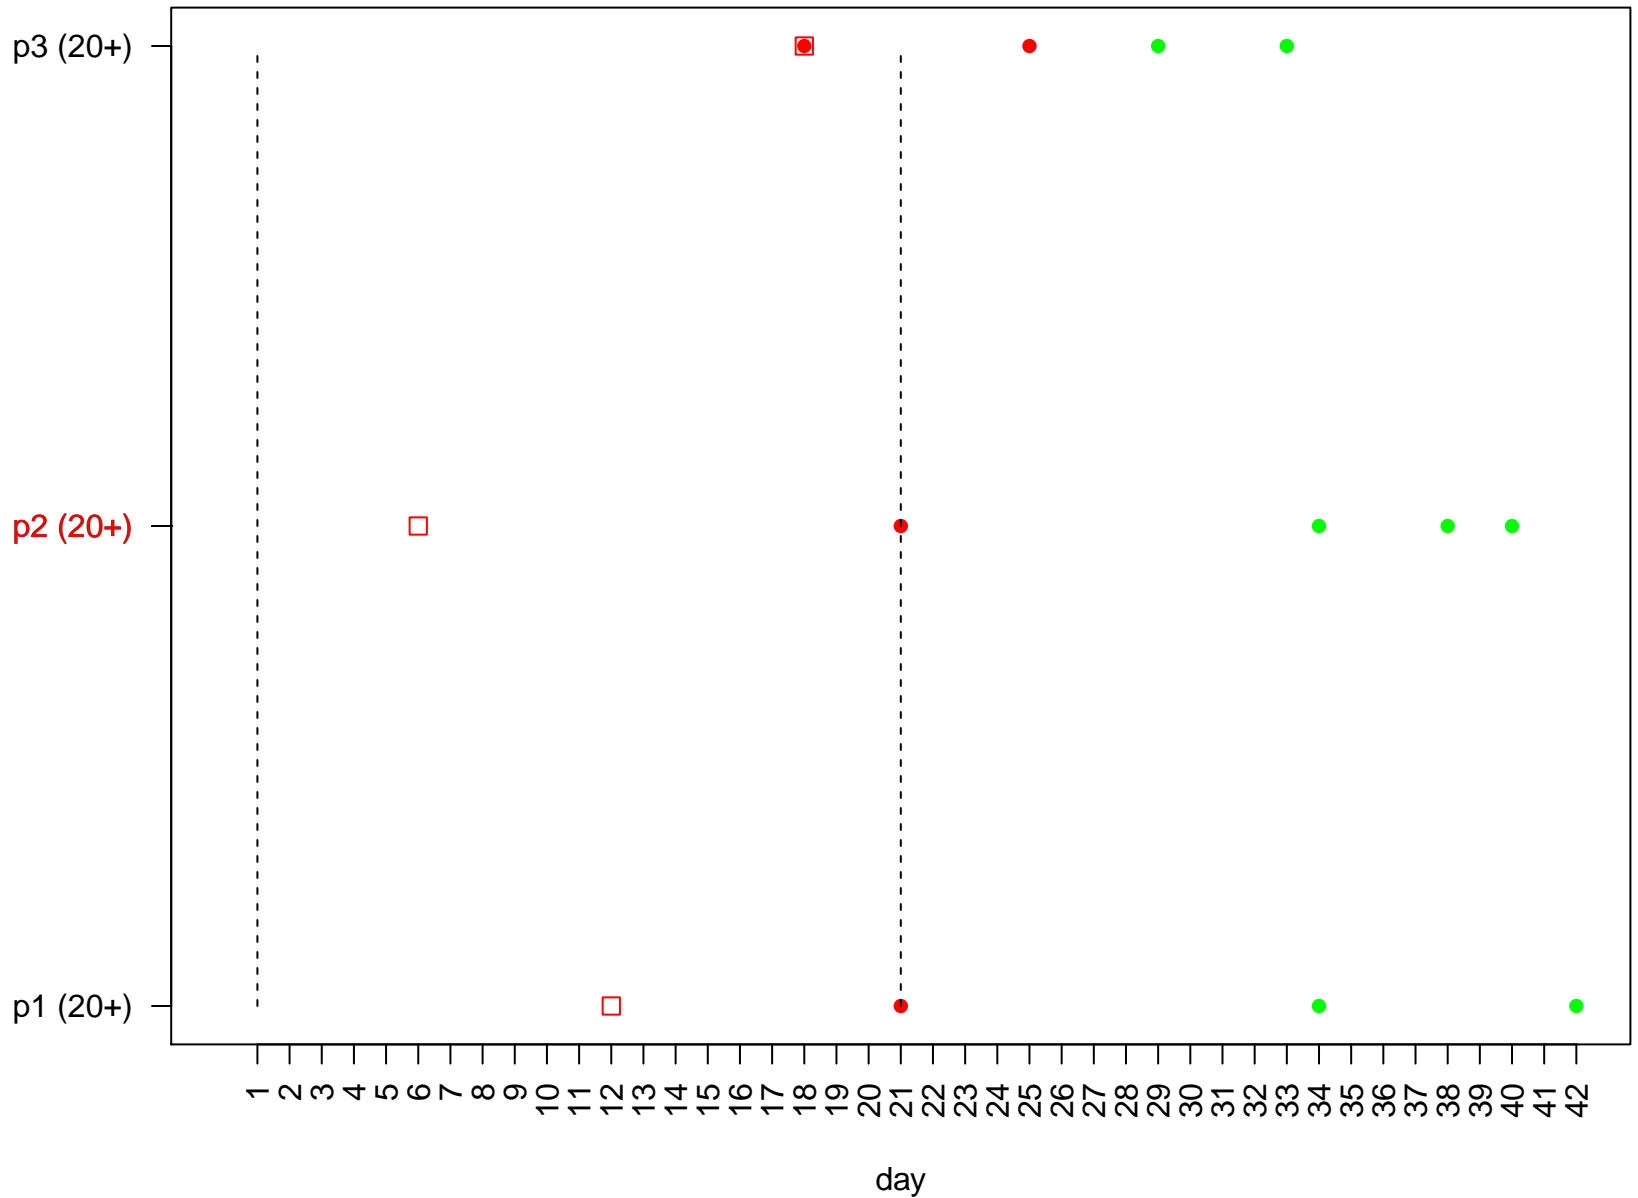

# Household 576

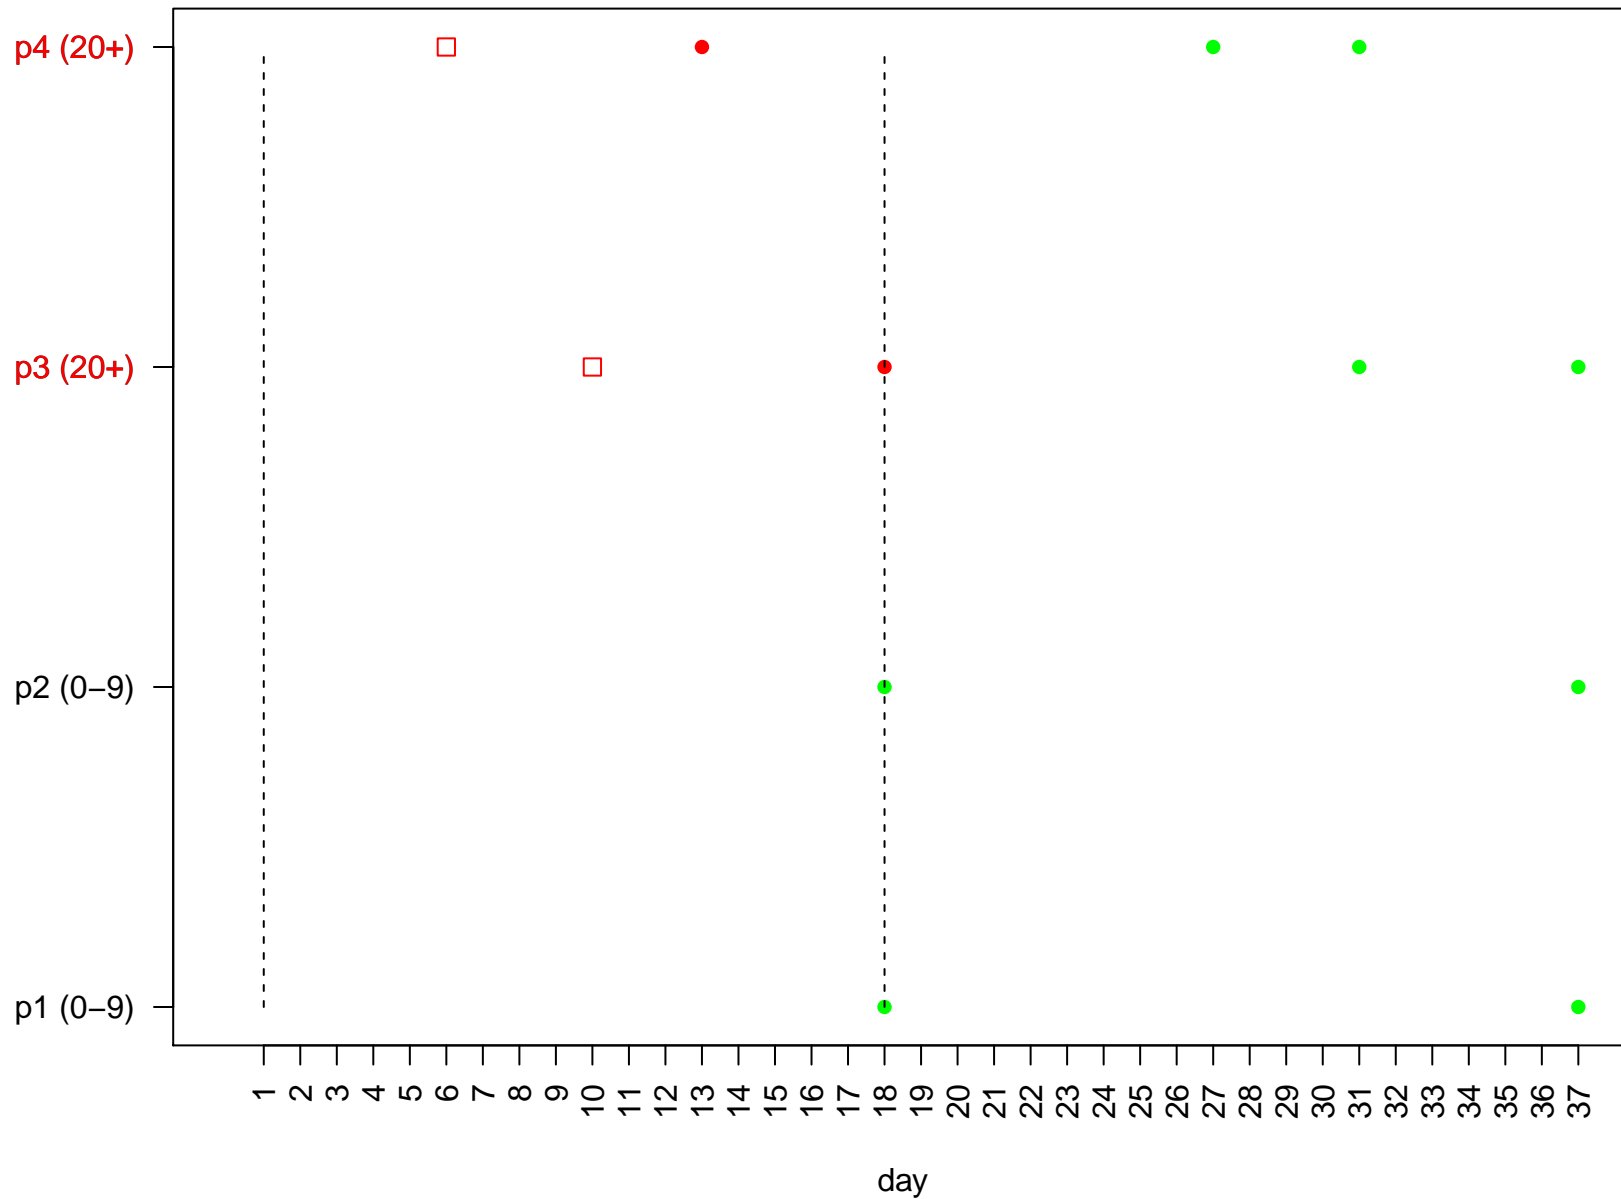

# Household 577

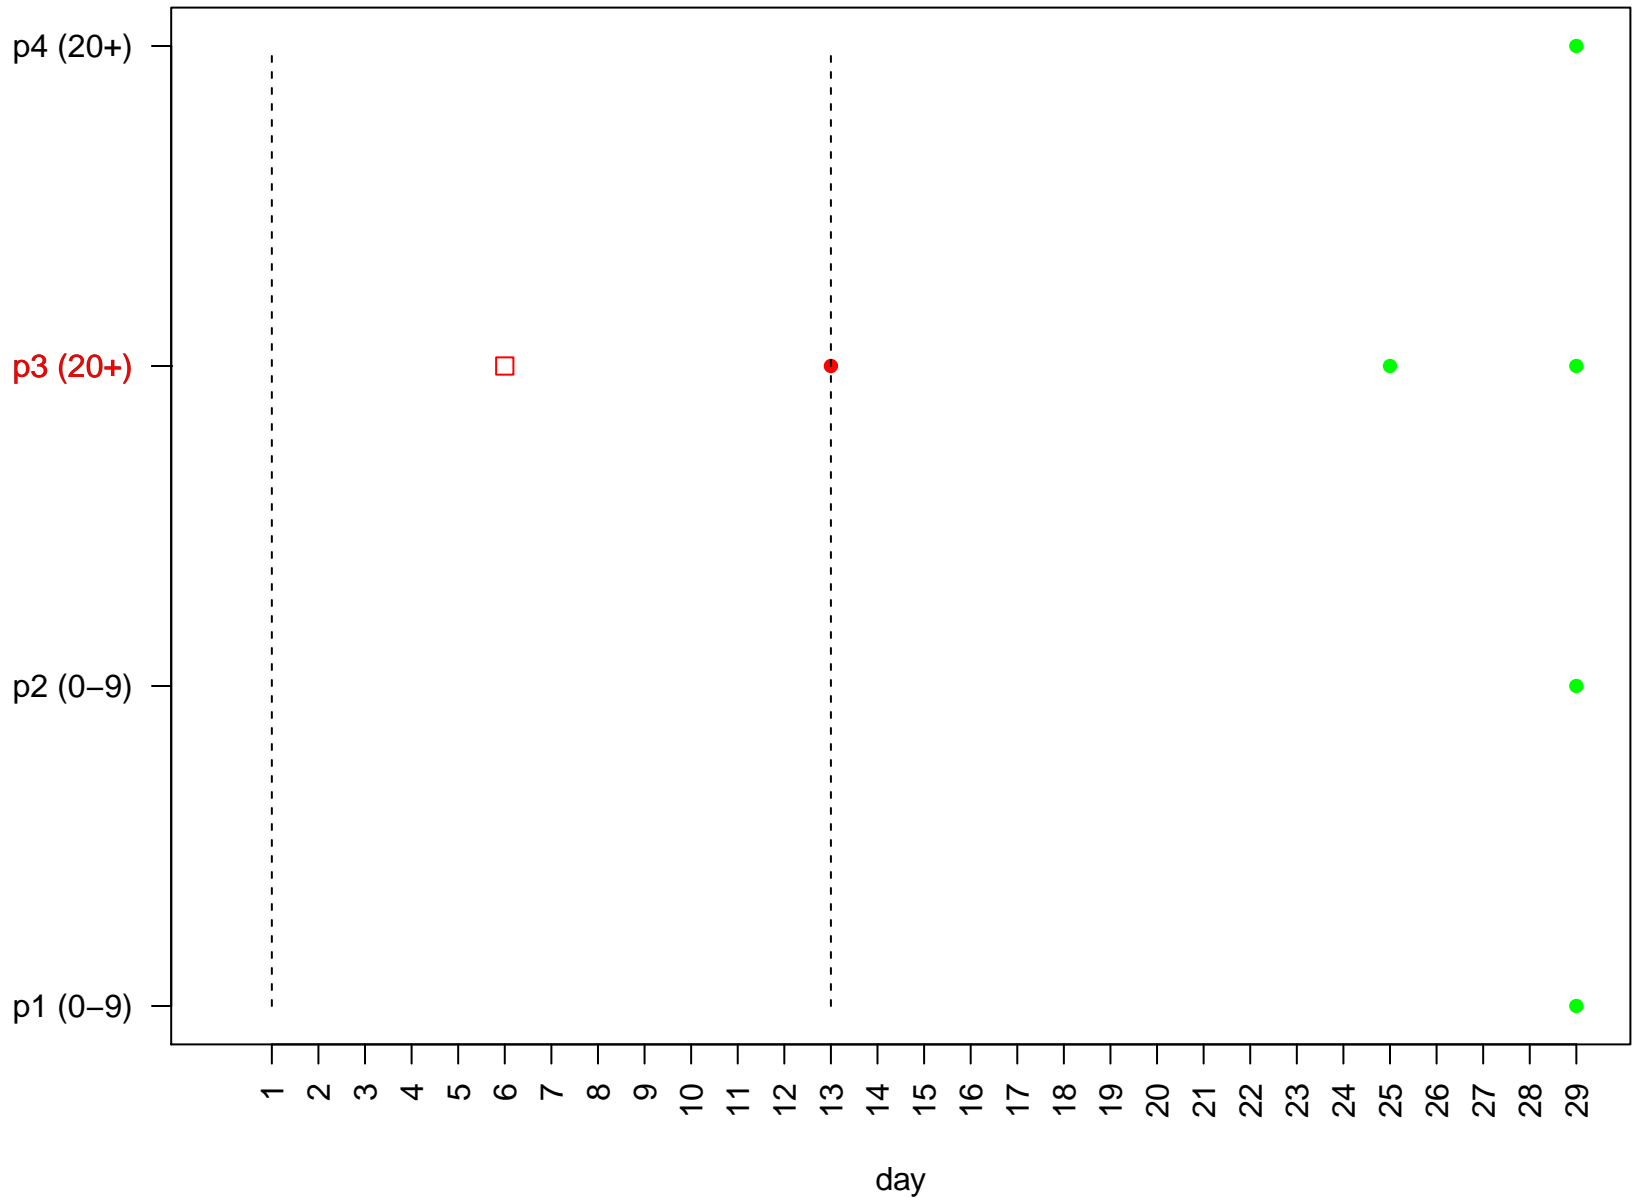



# Household 578

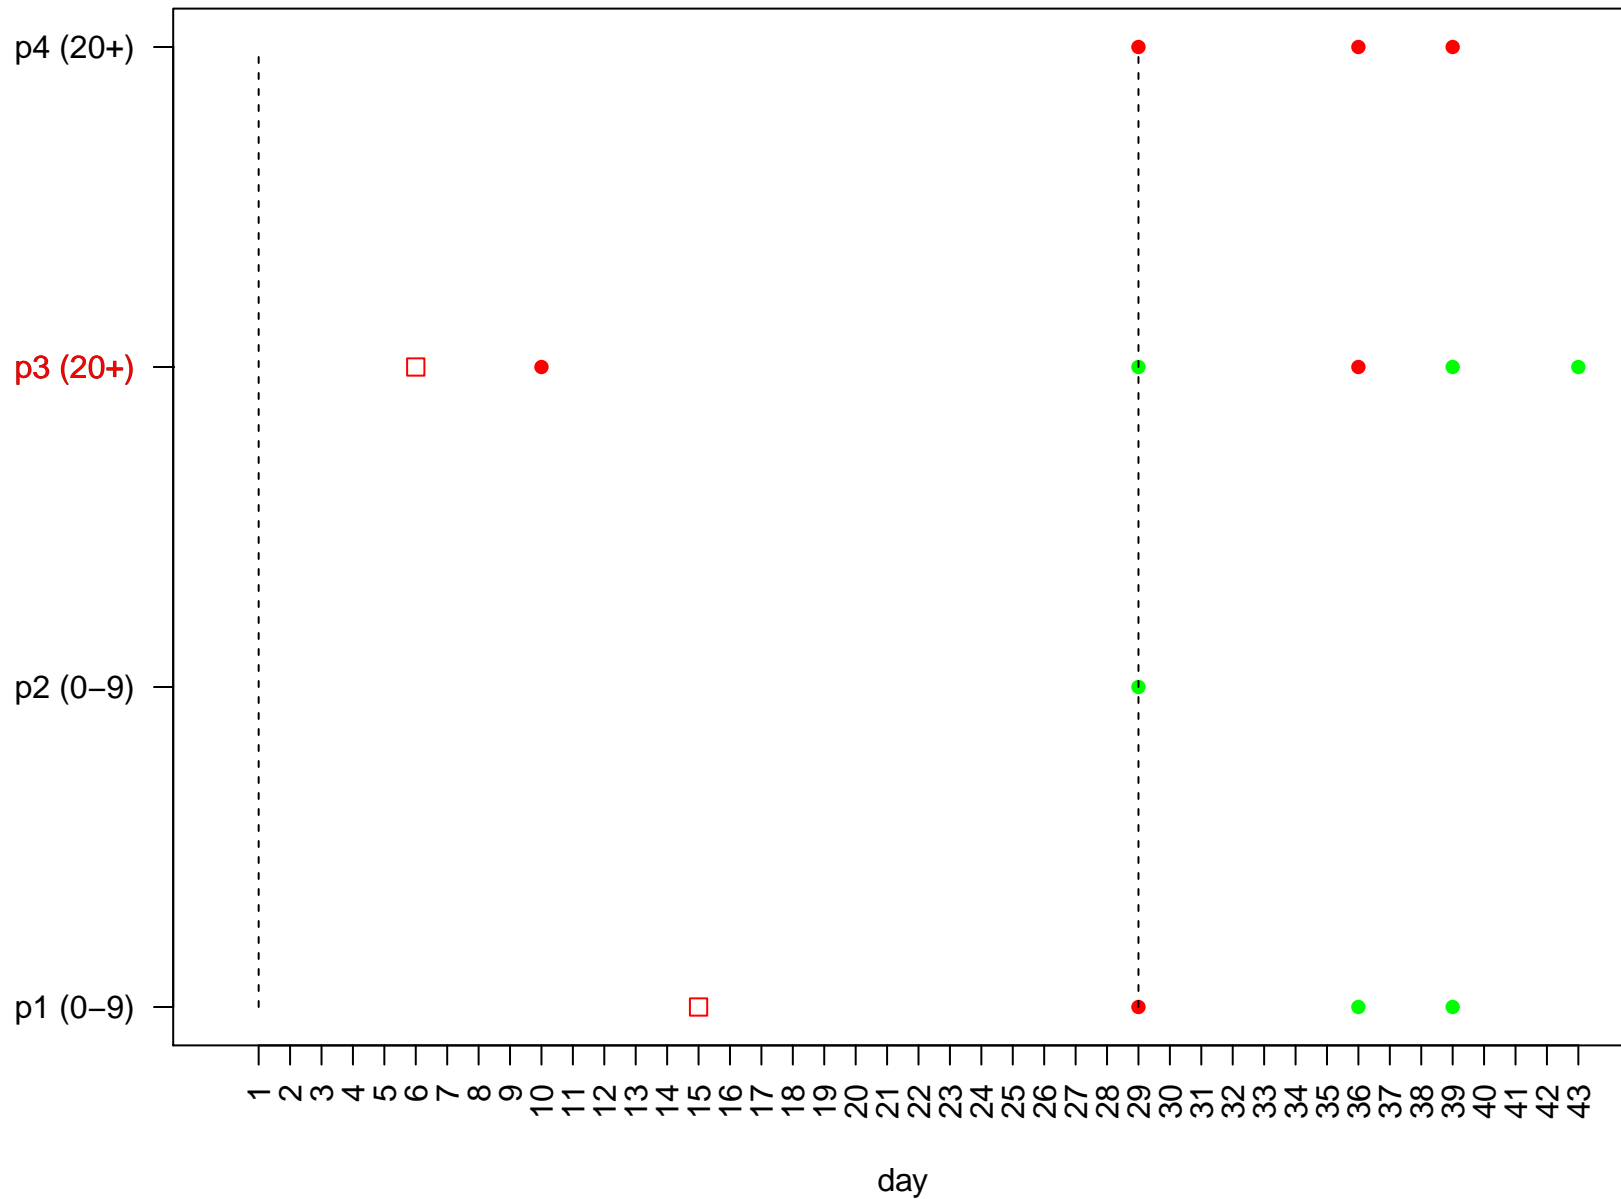

# Household 579

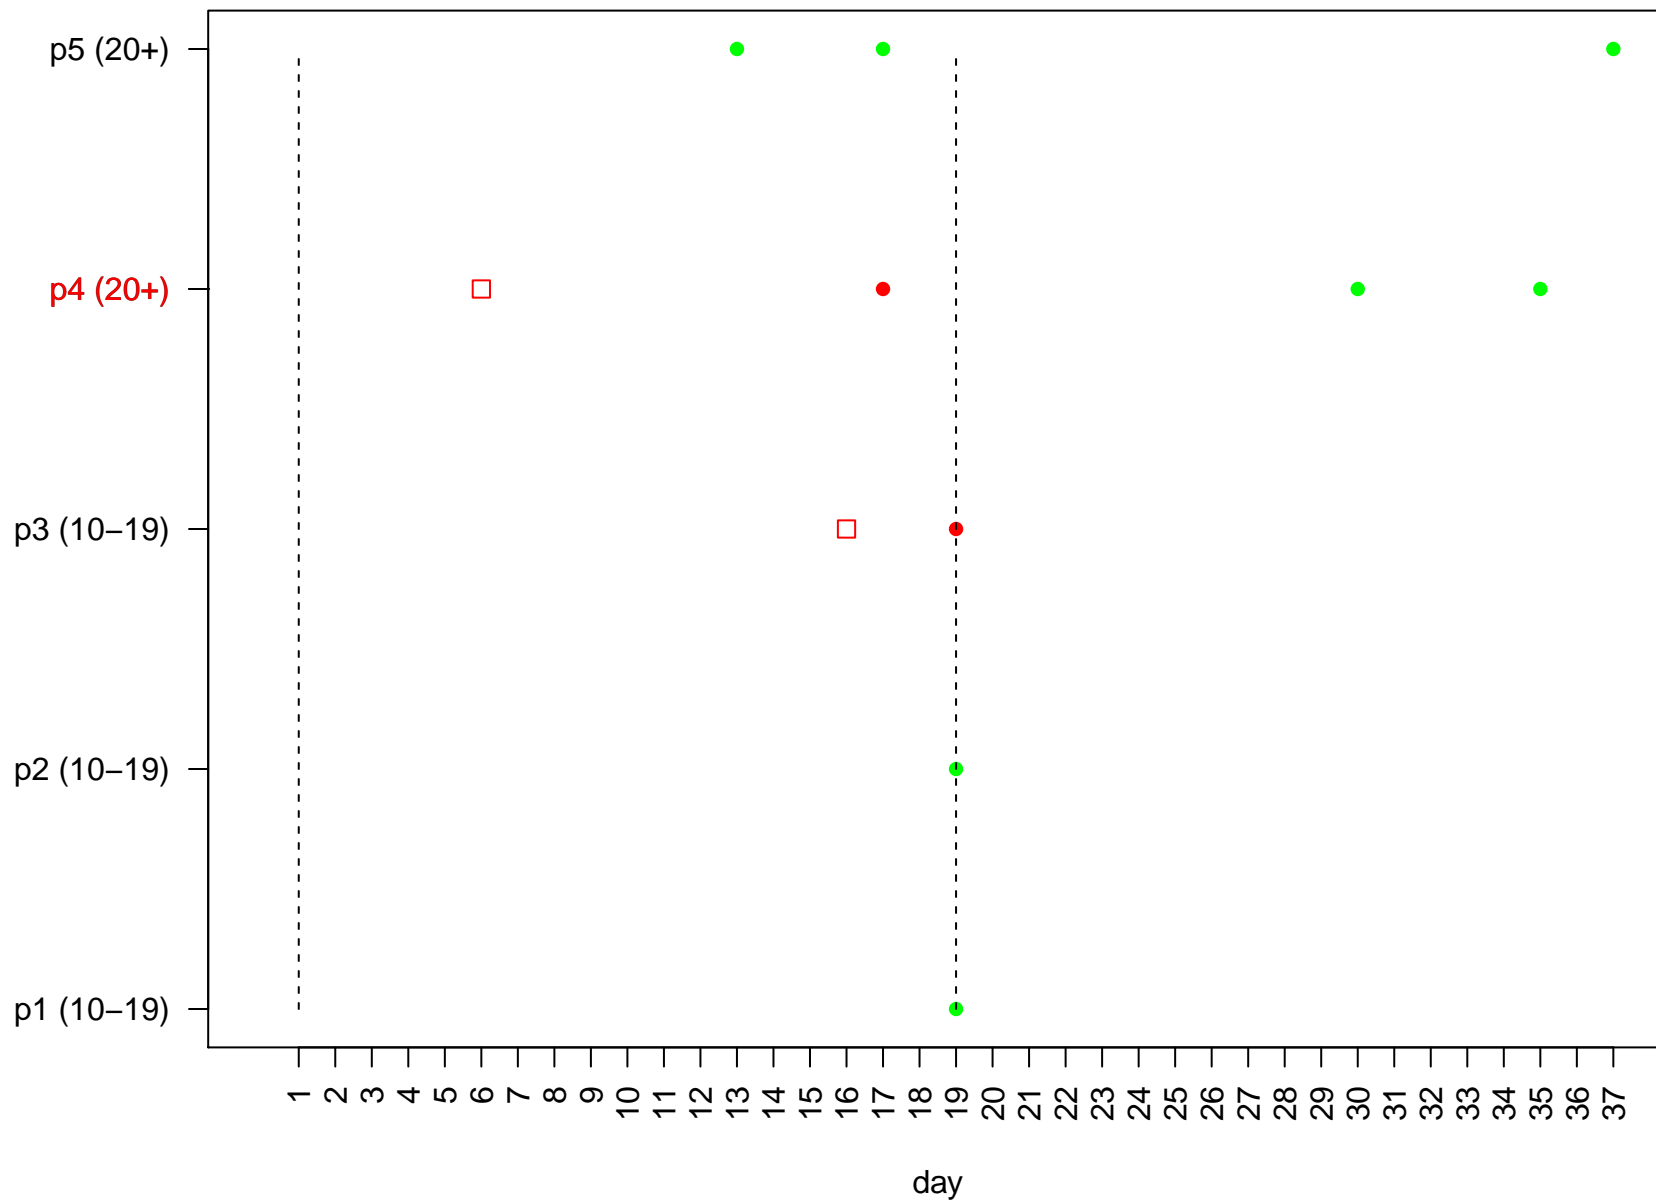

# Household 581

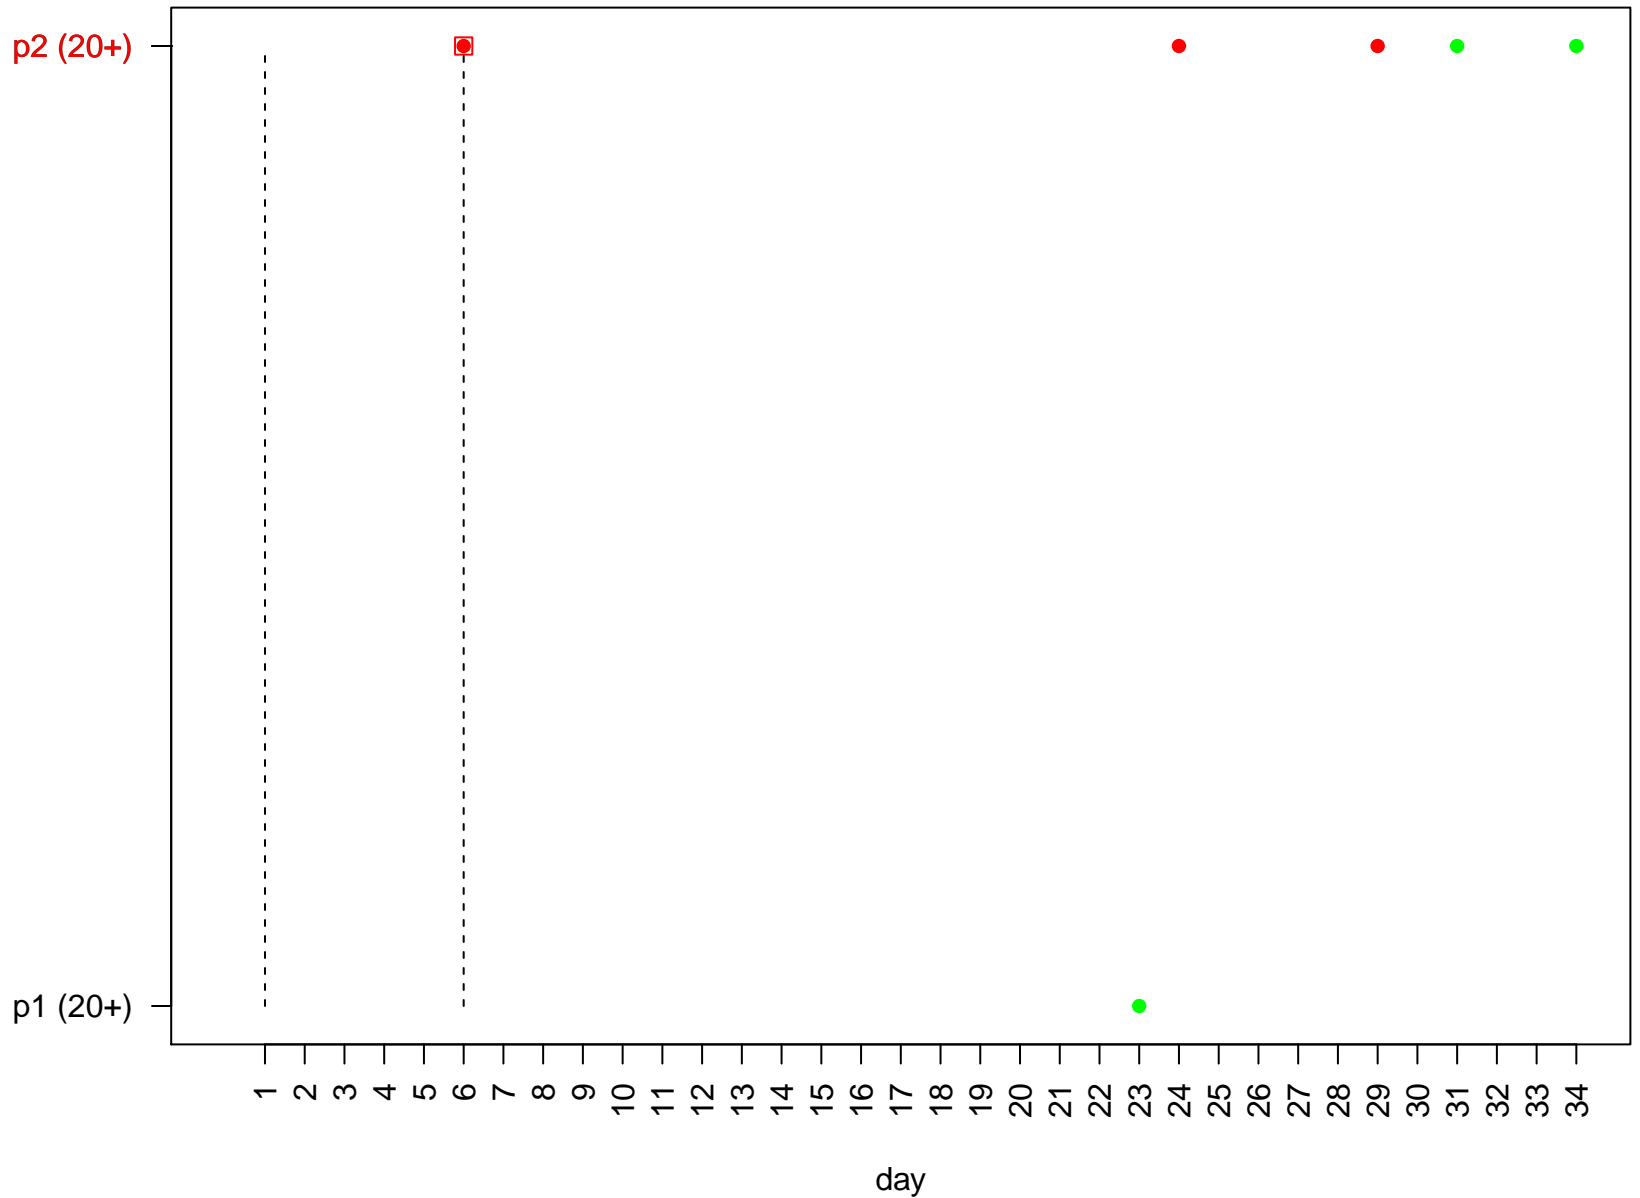

# Household 582

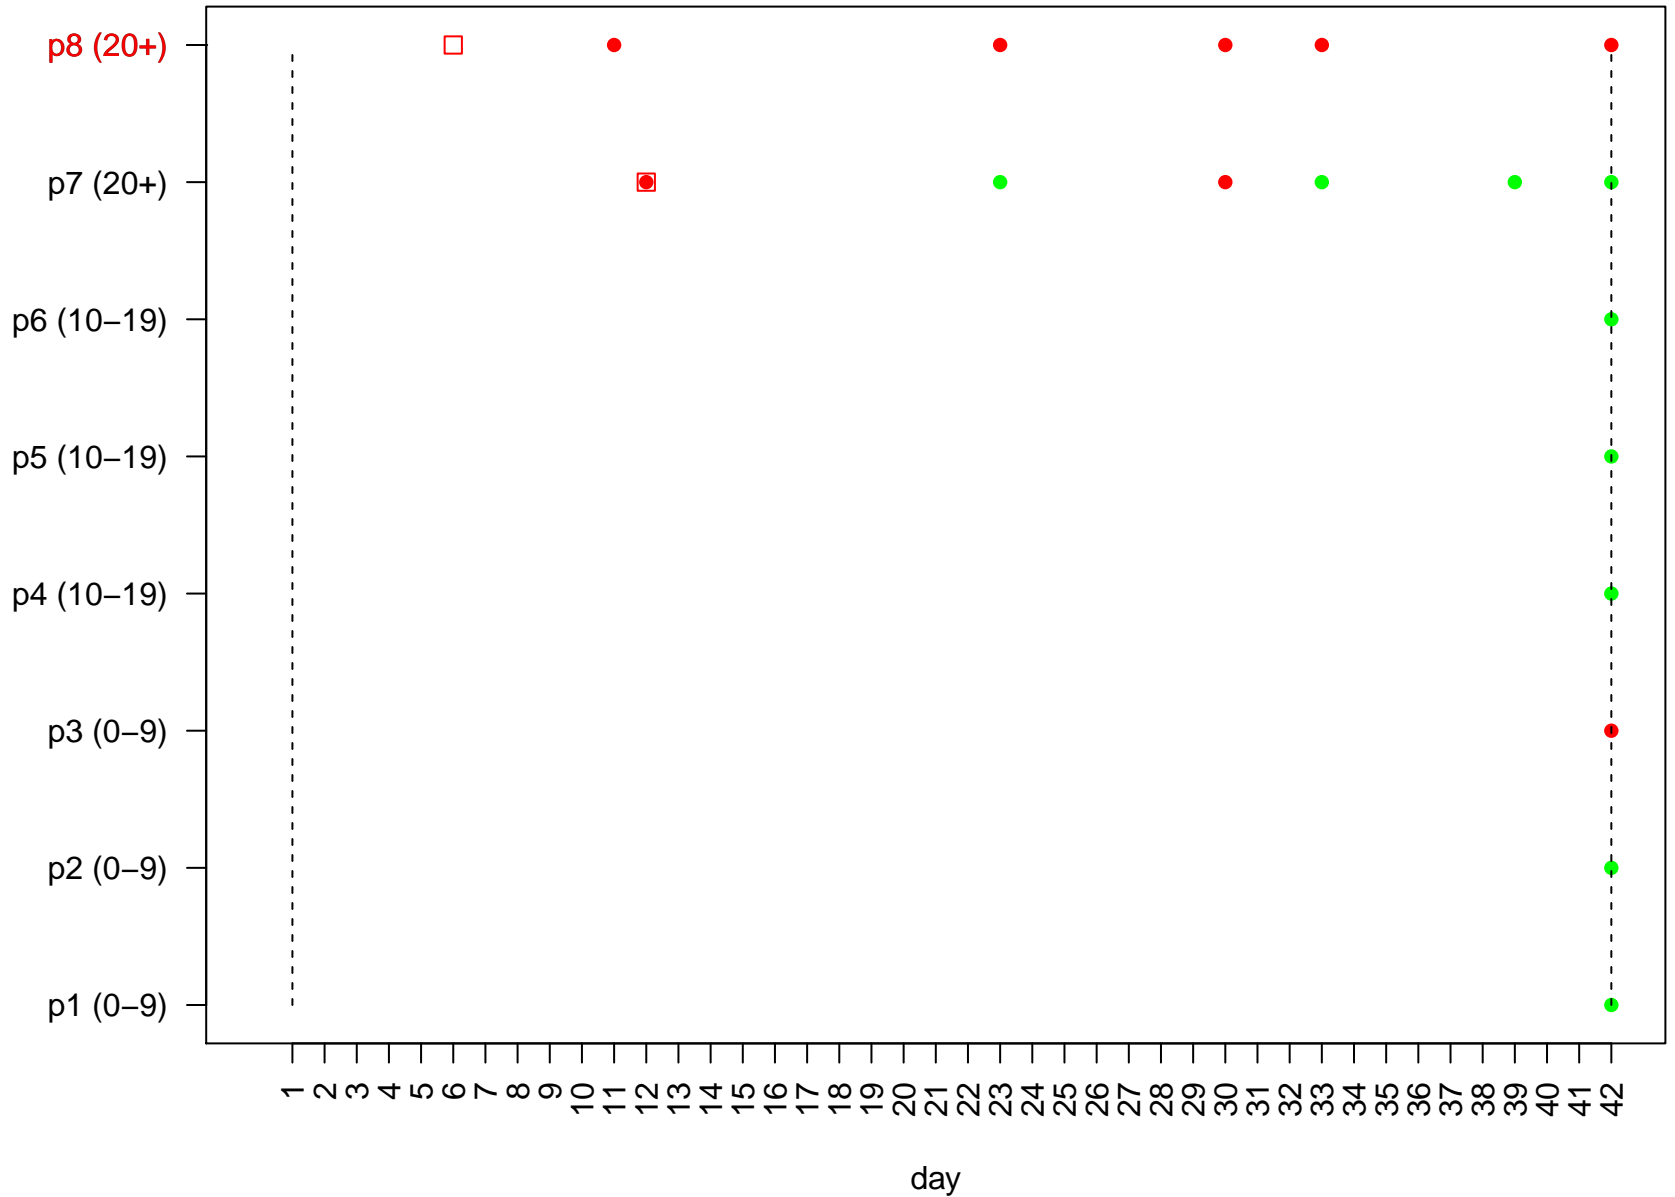

# Household 583

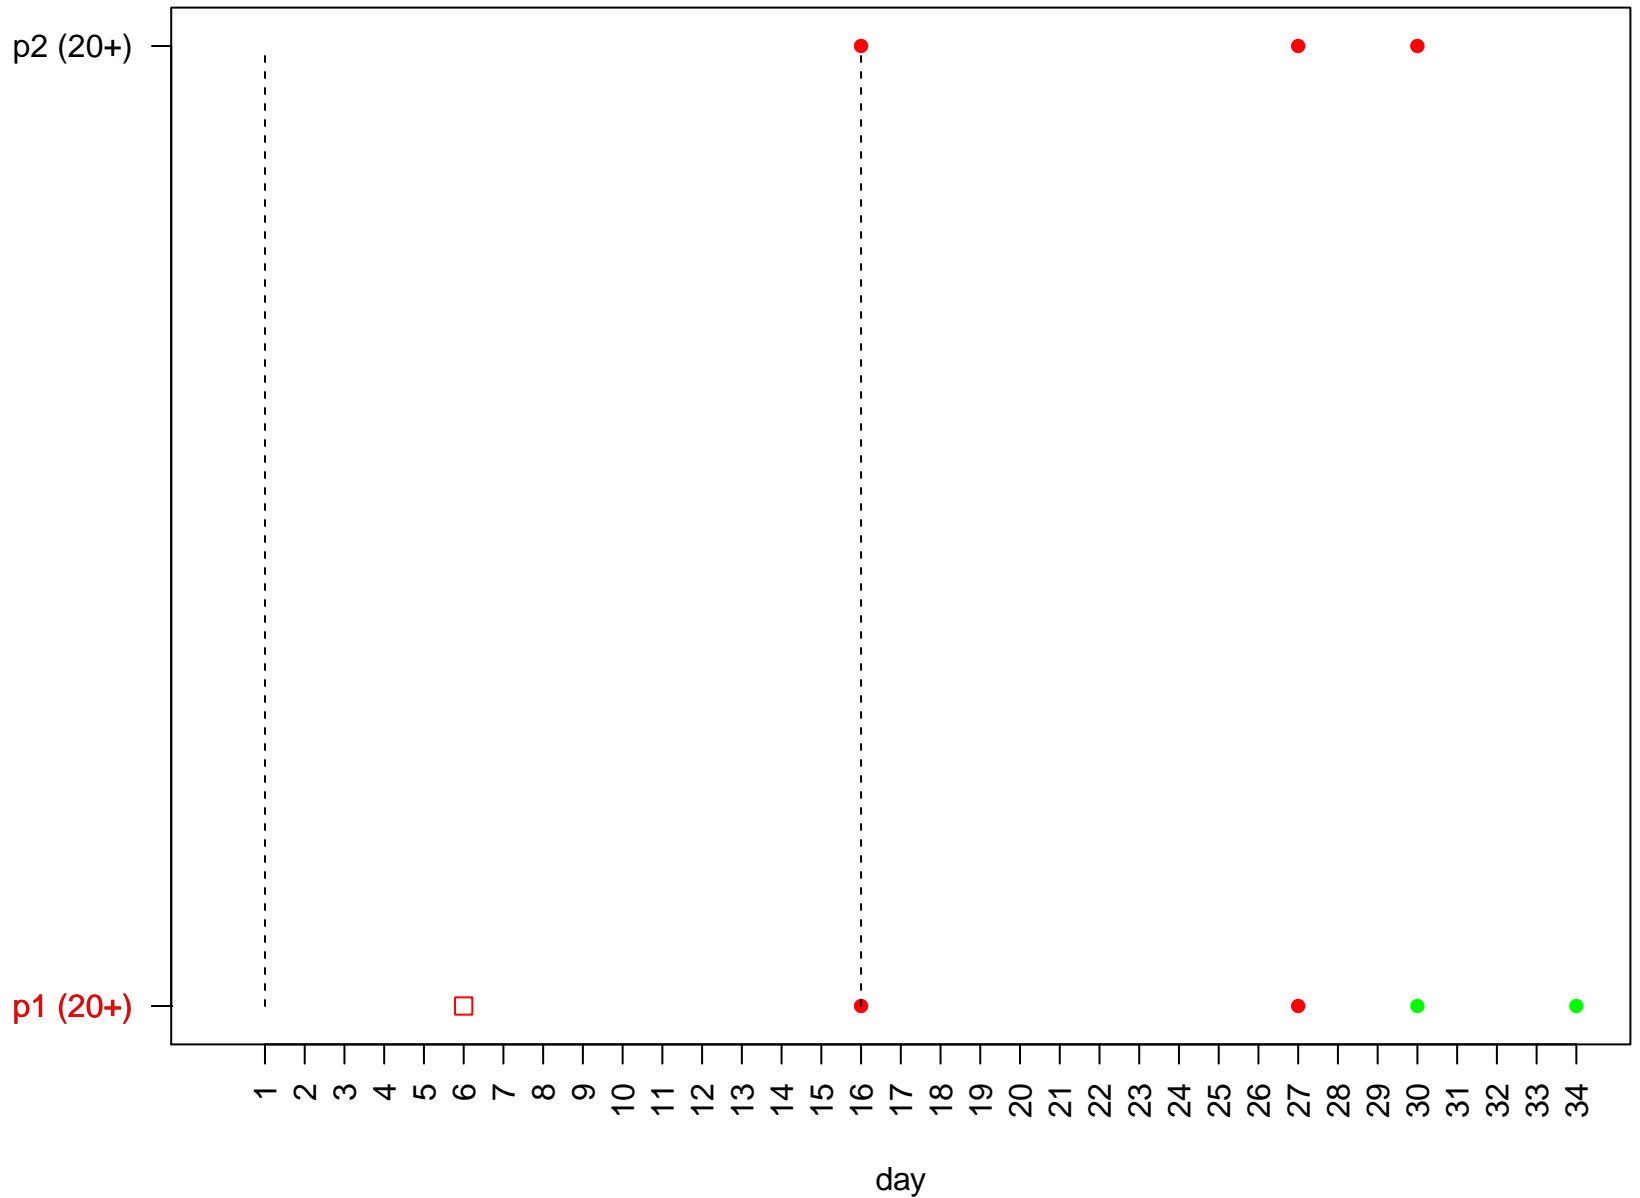

# Household 584

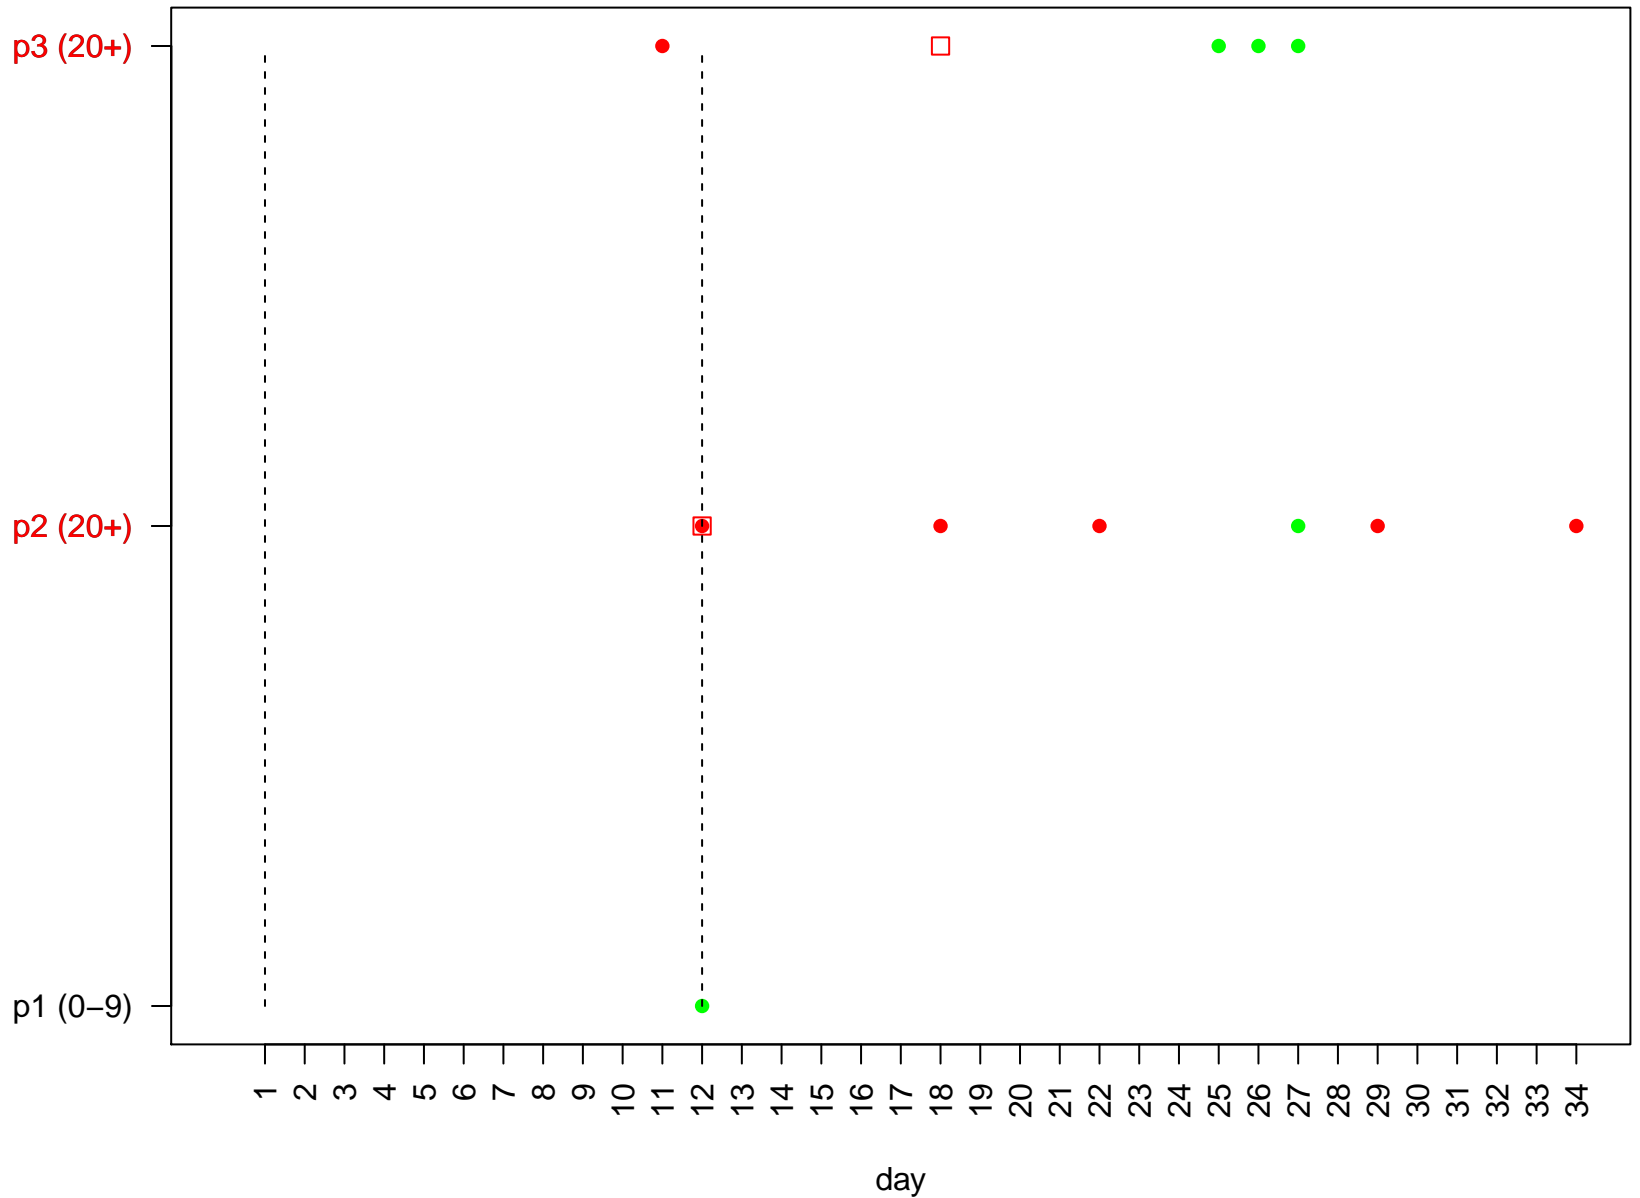

# Household 585

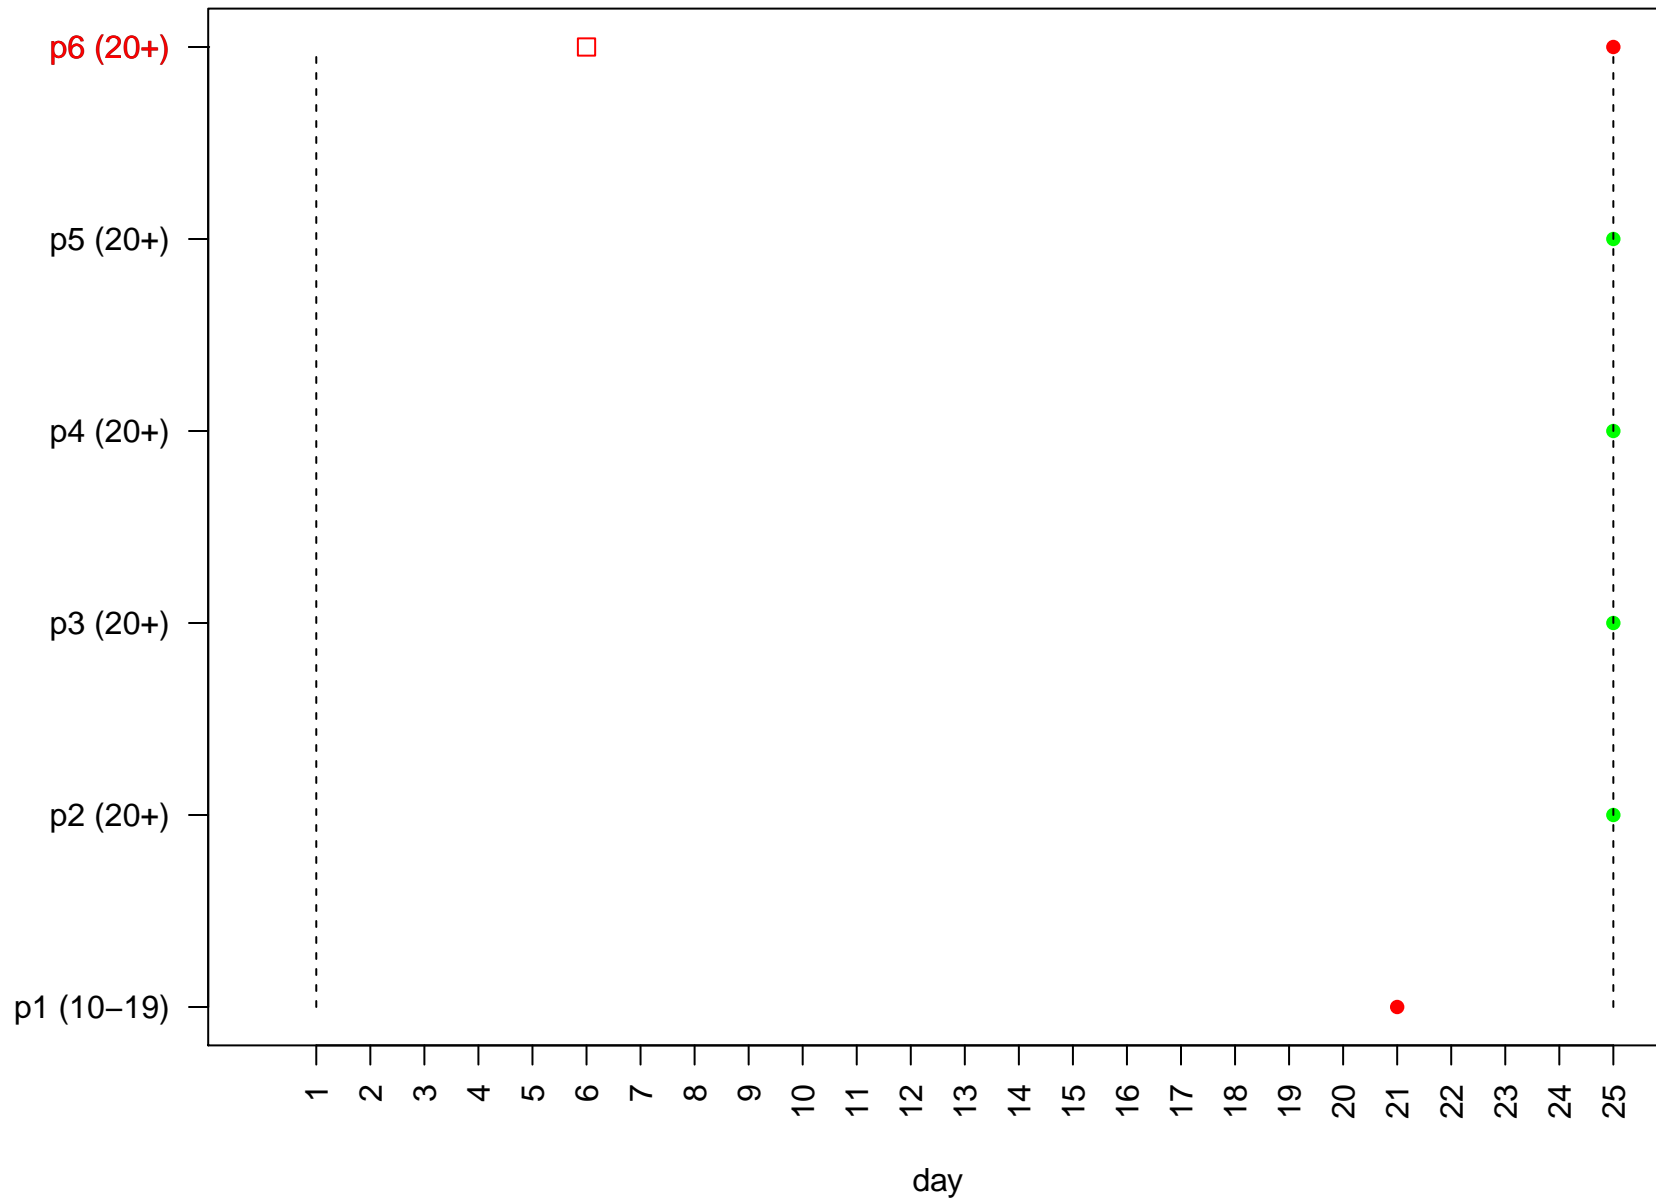

# Household 586

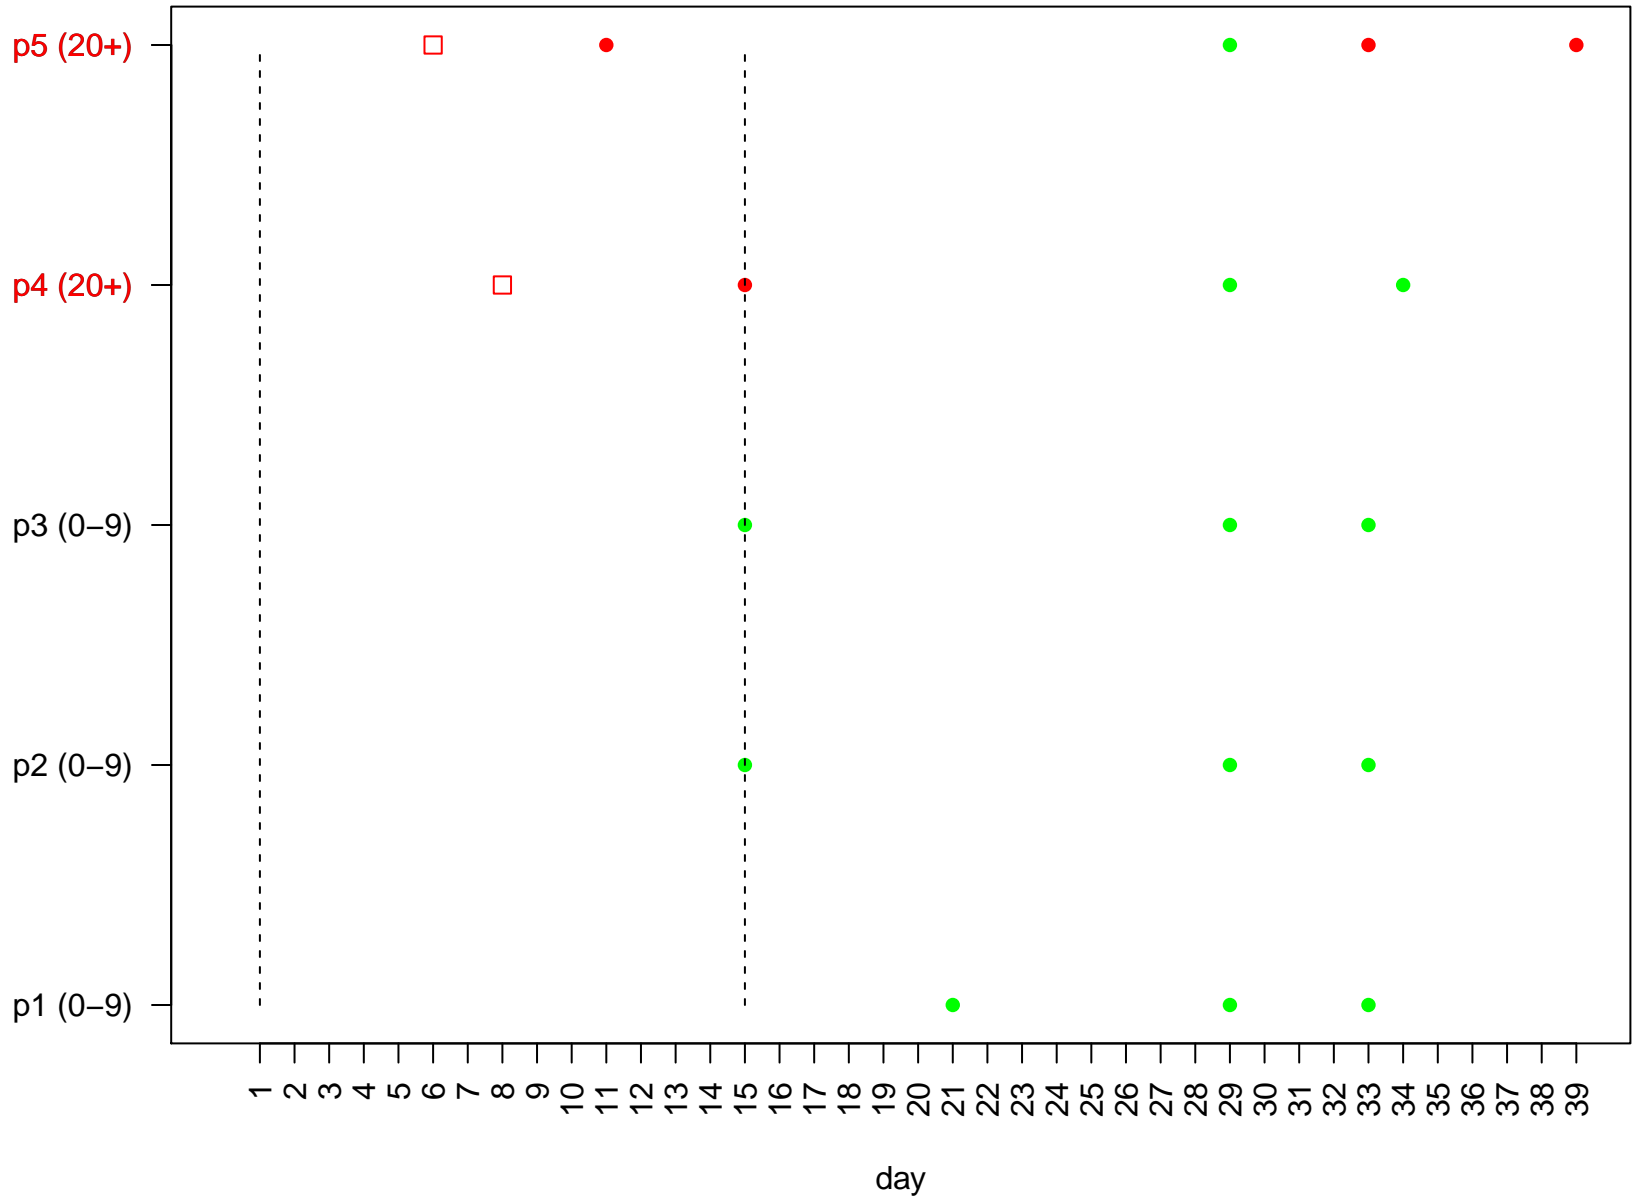



# Household 589

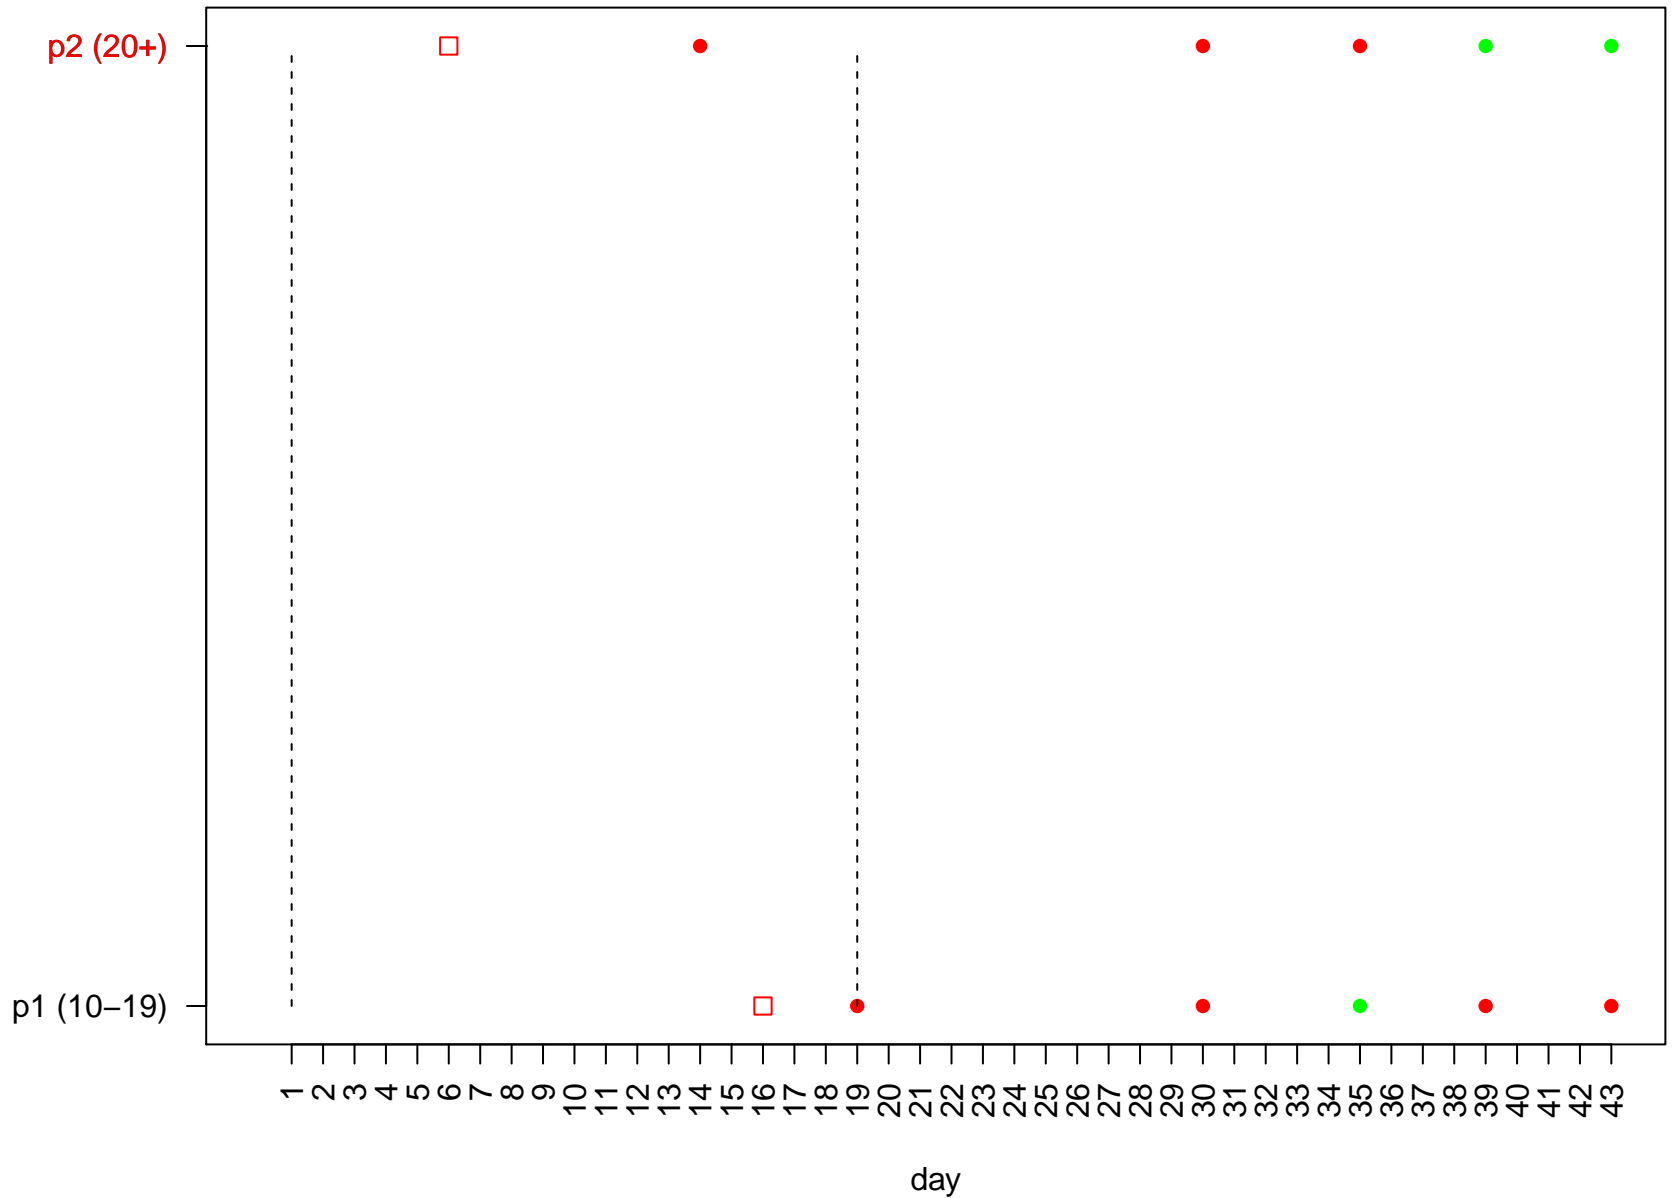

# Household 590

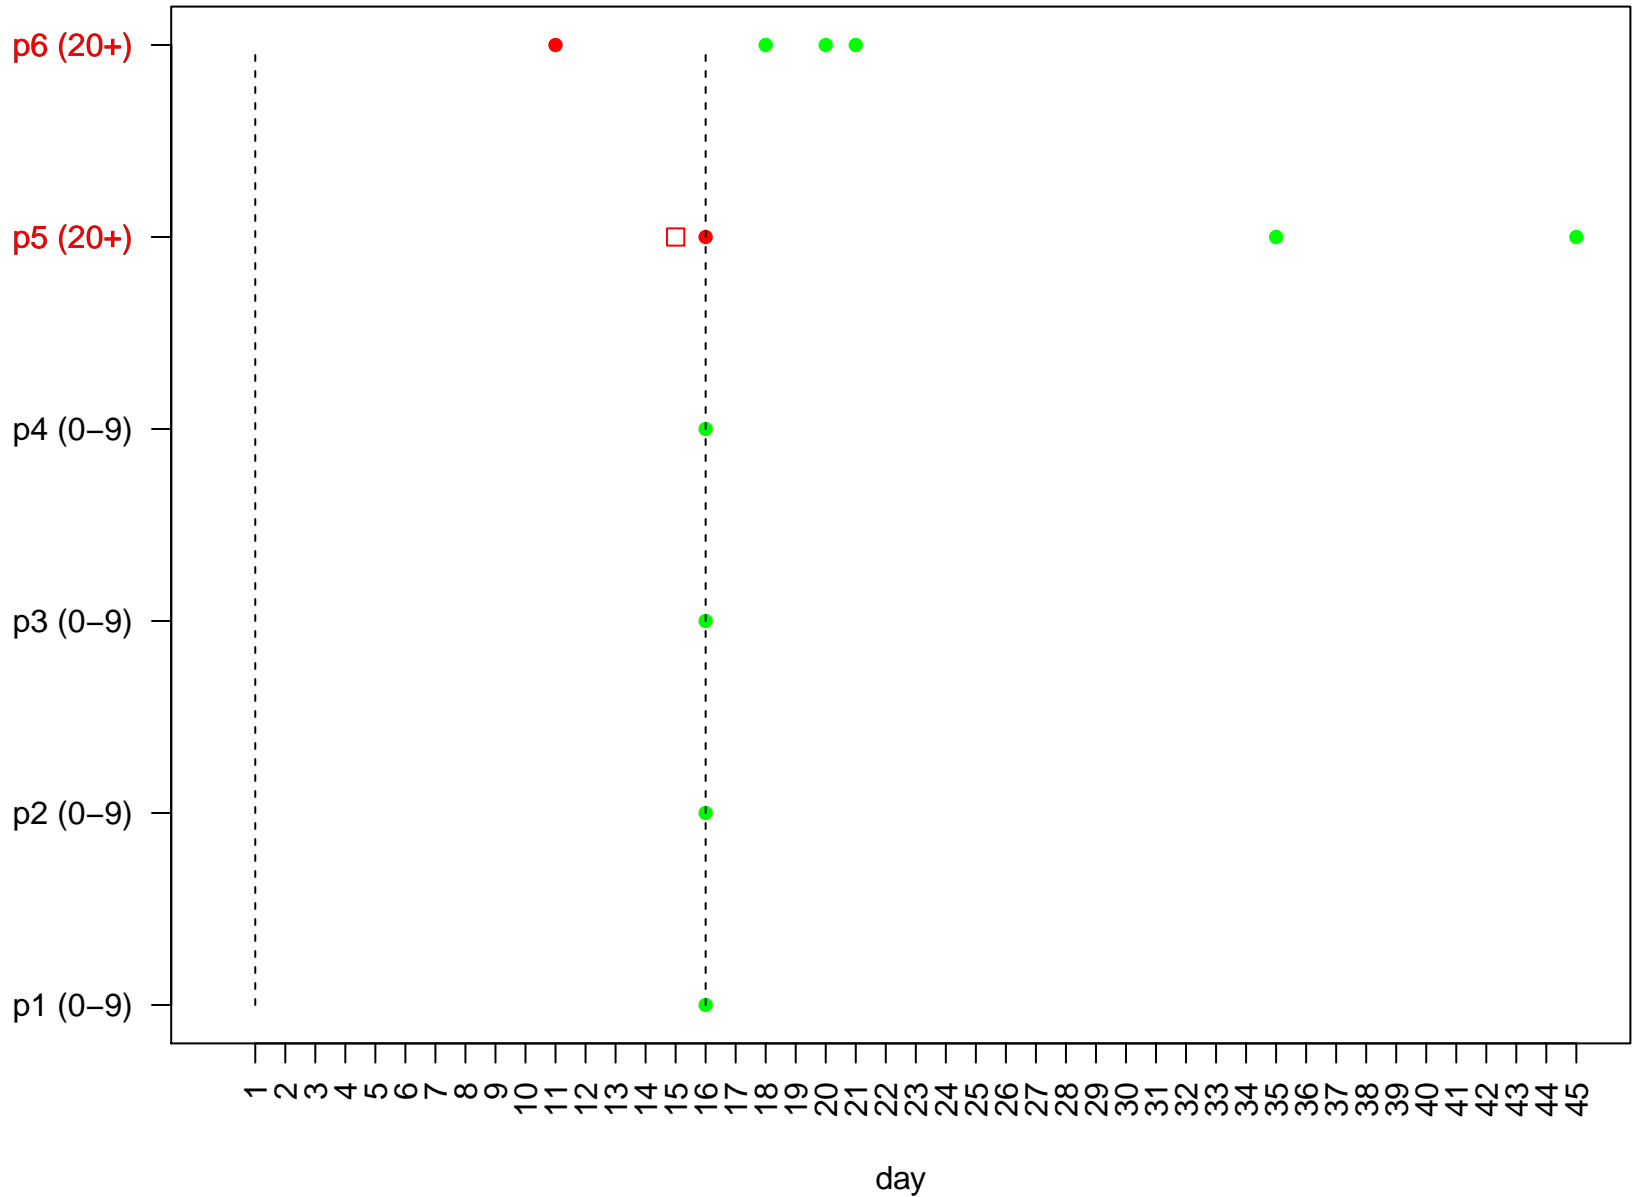

# Household 591

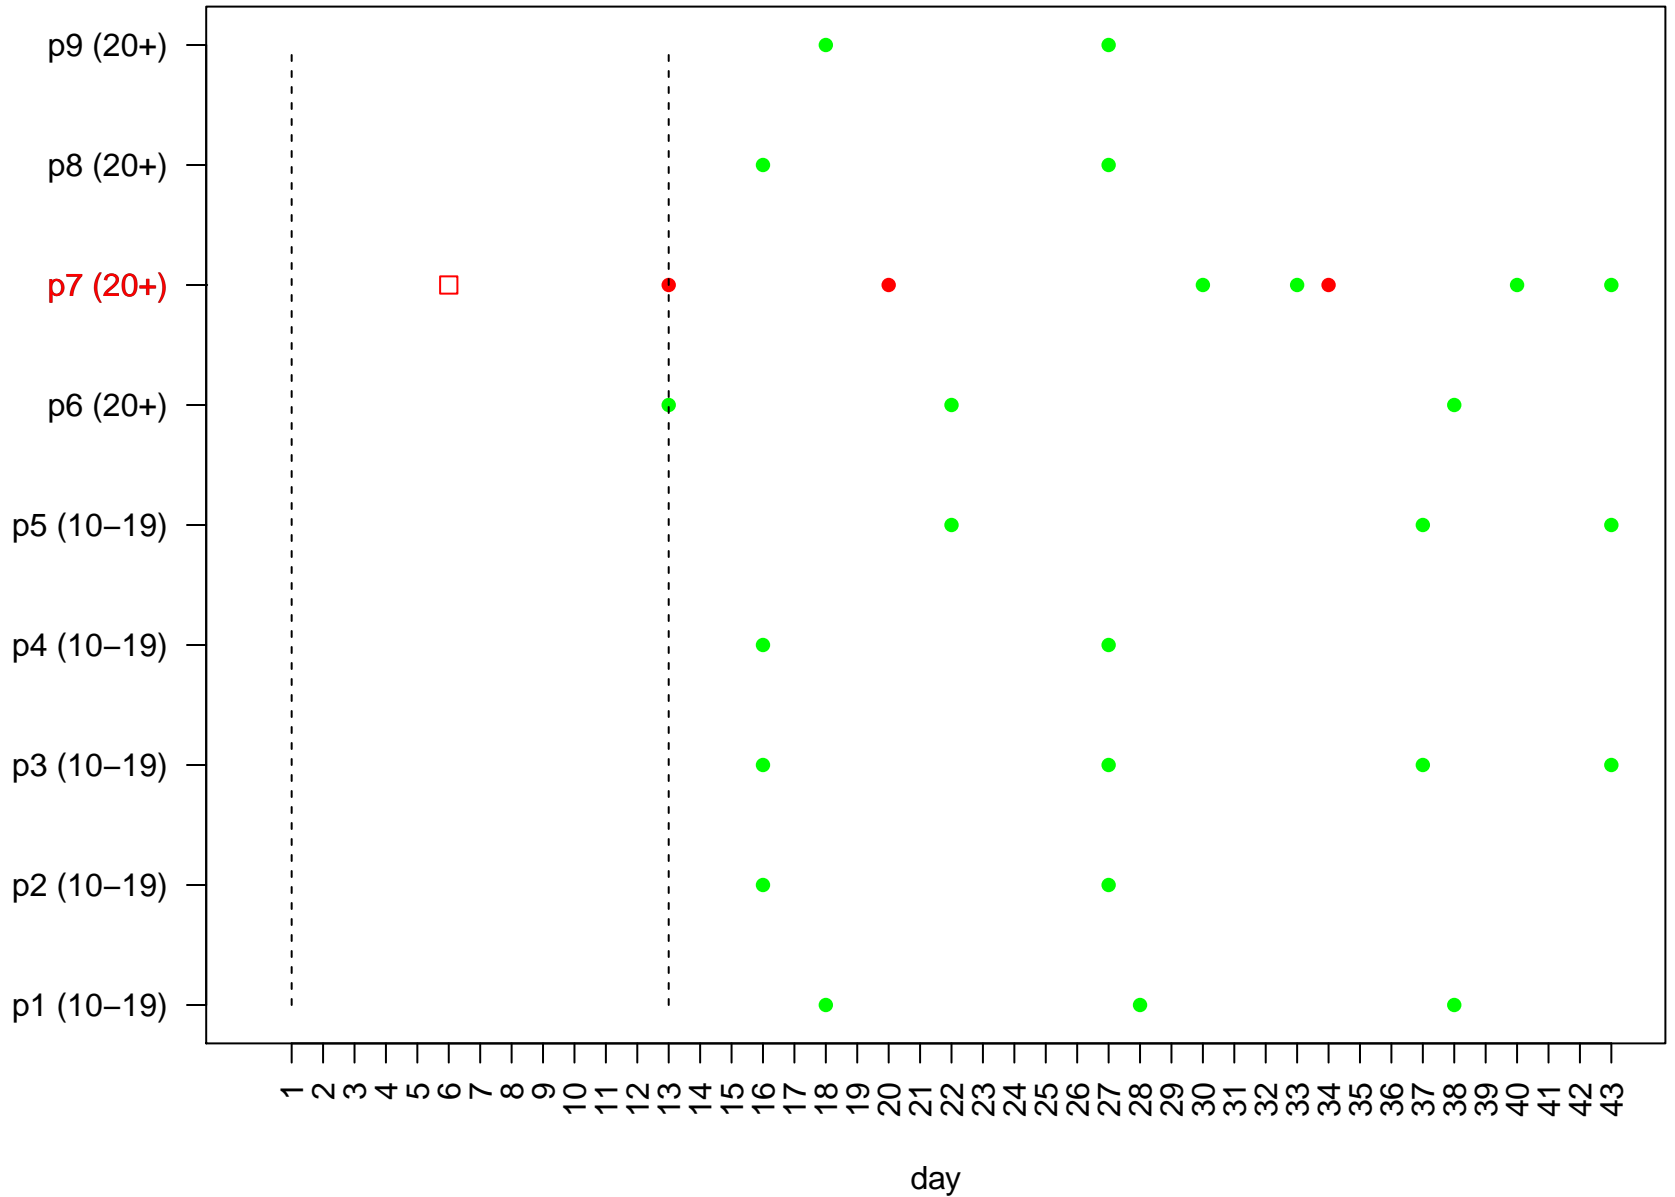

# Household 592

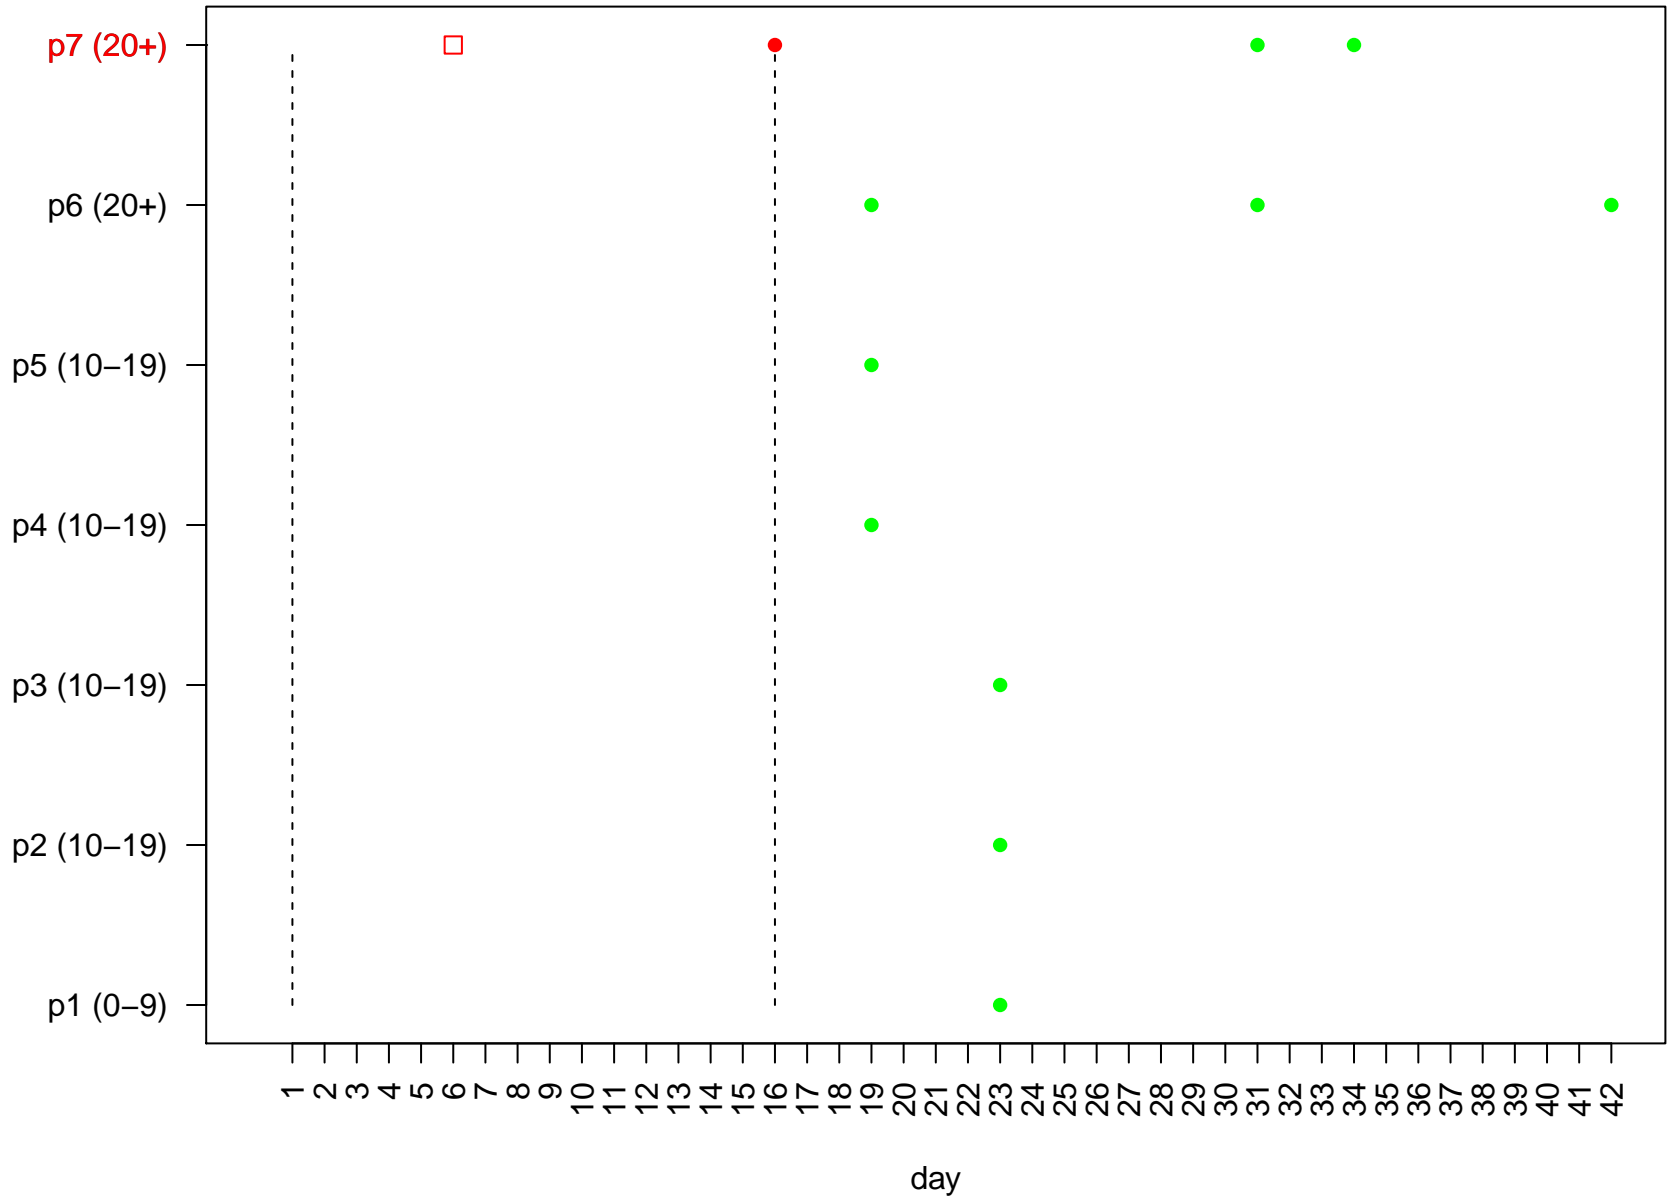

# Household 593

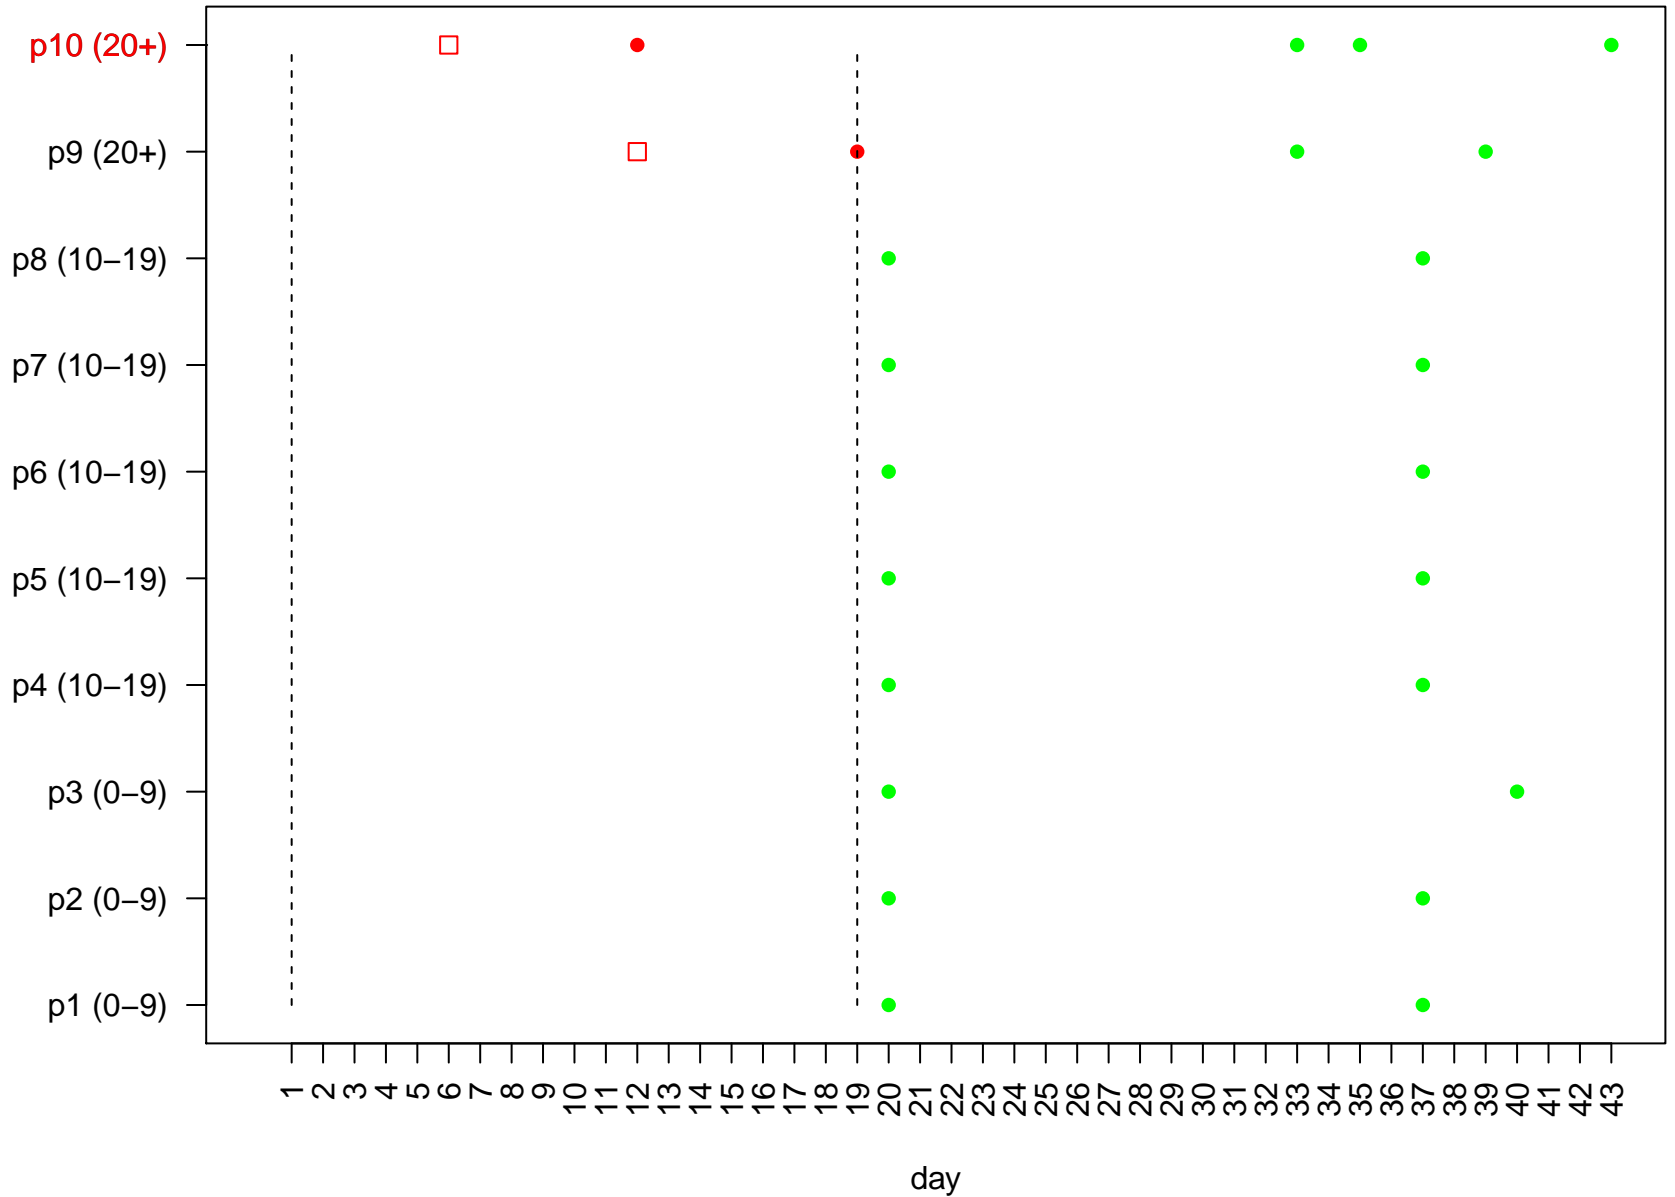

# Household 594

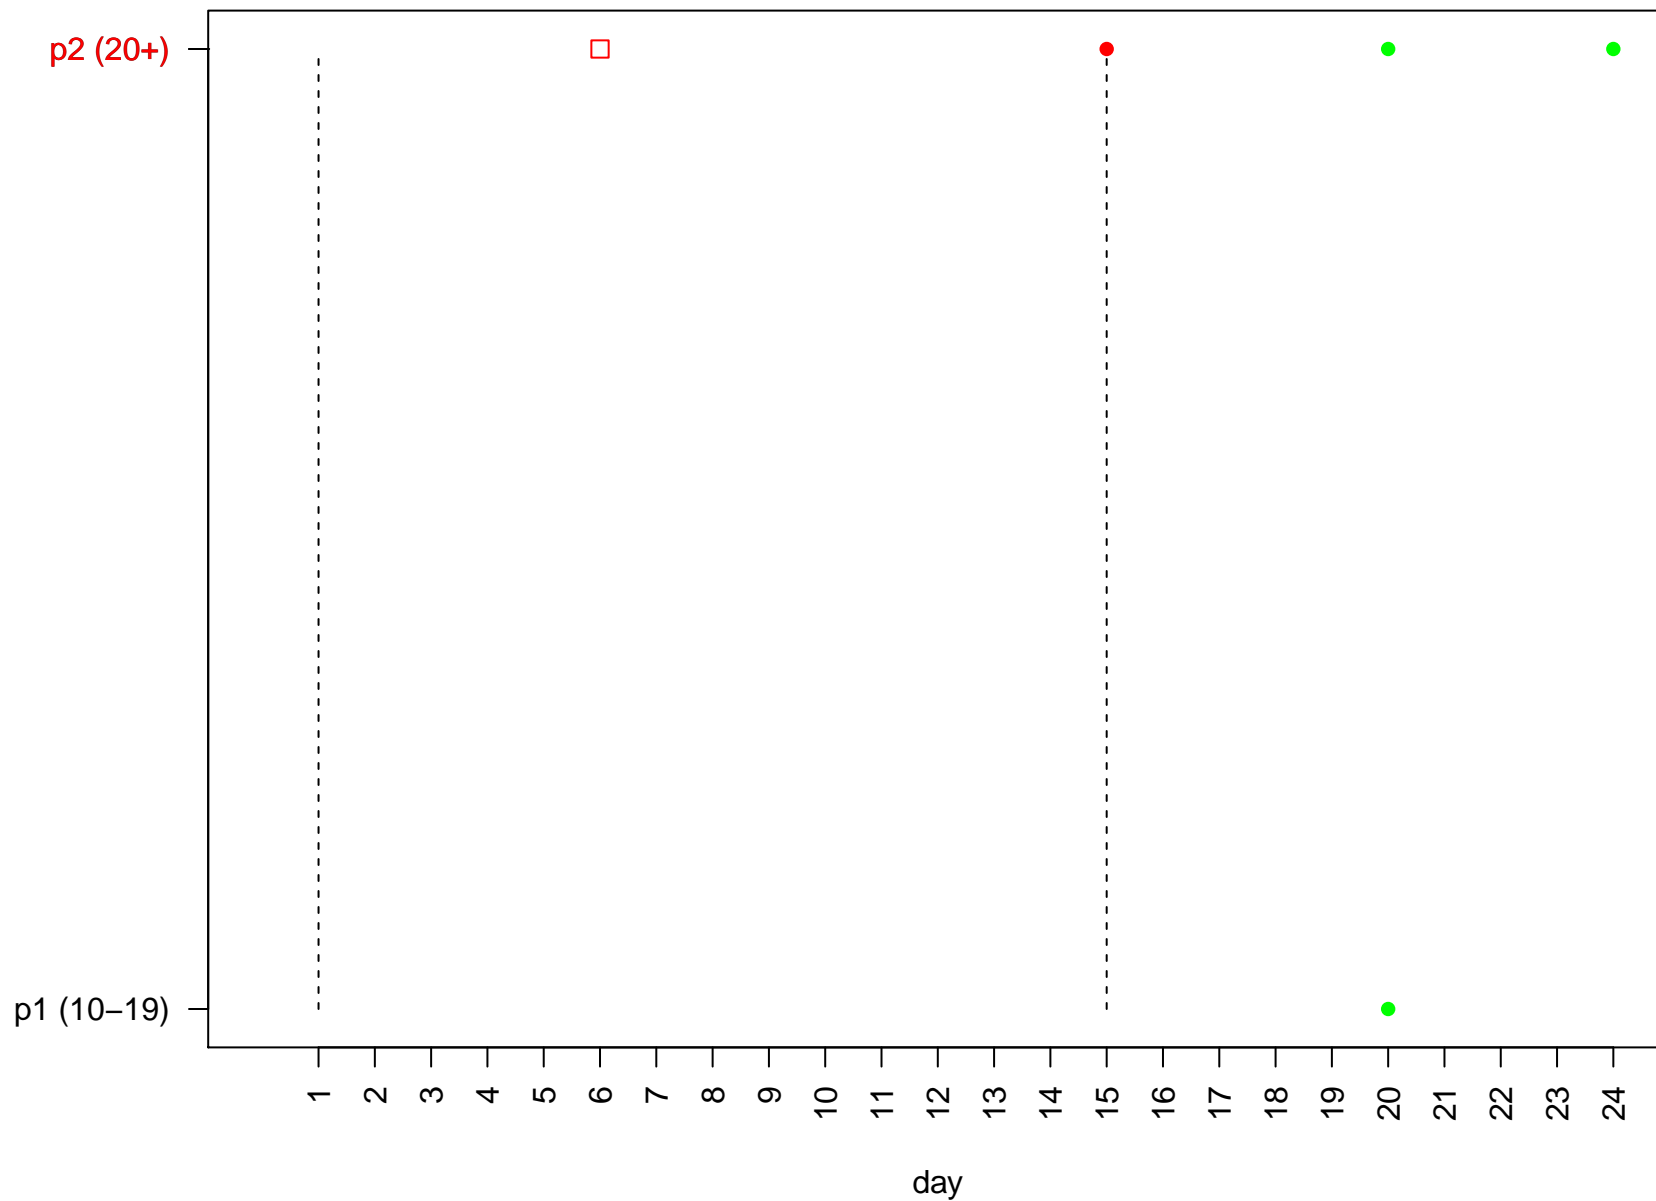

# Household 595

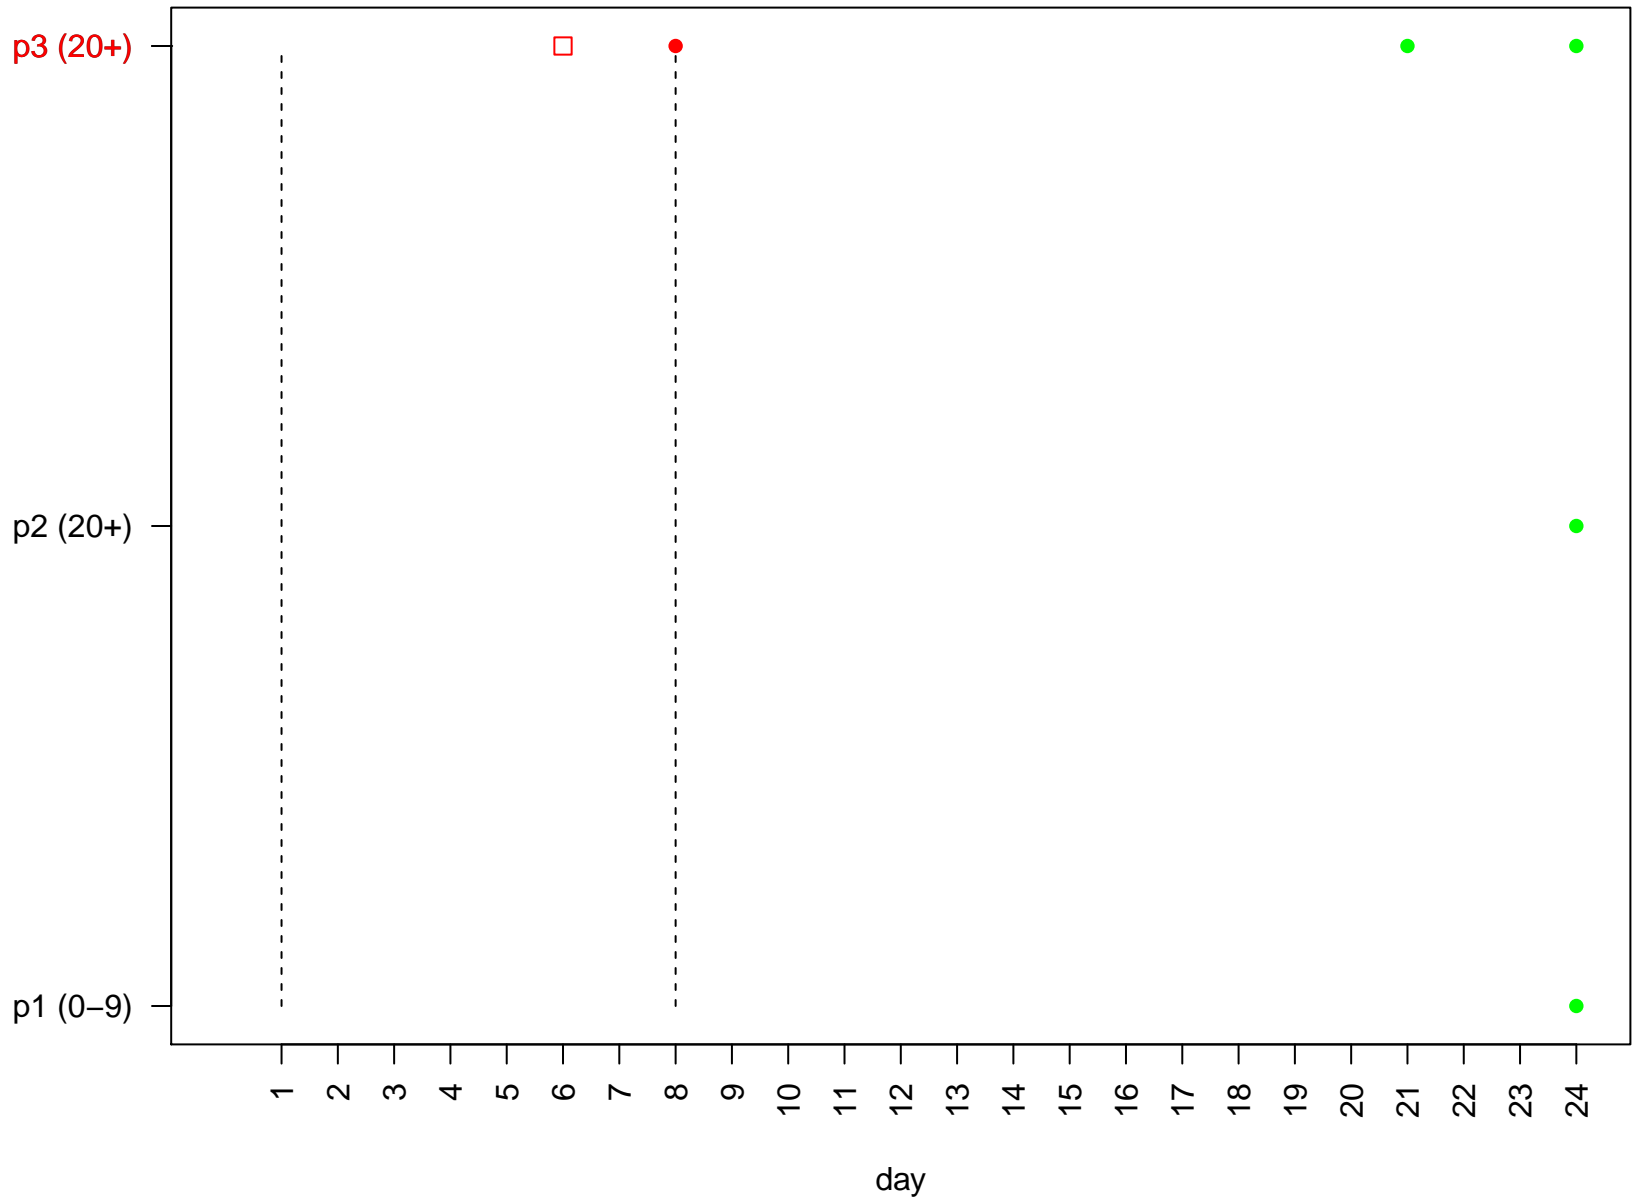

# Household 596

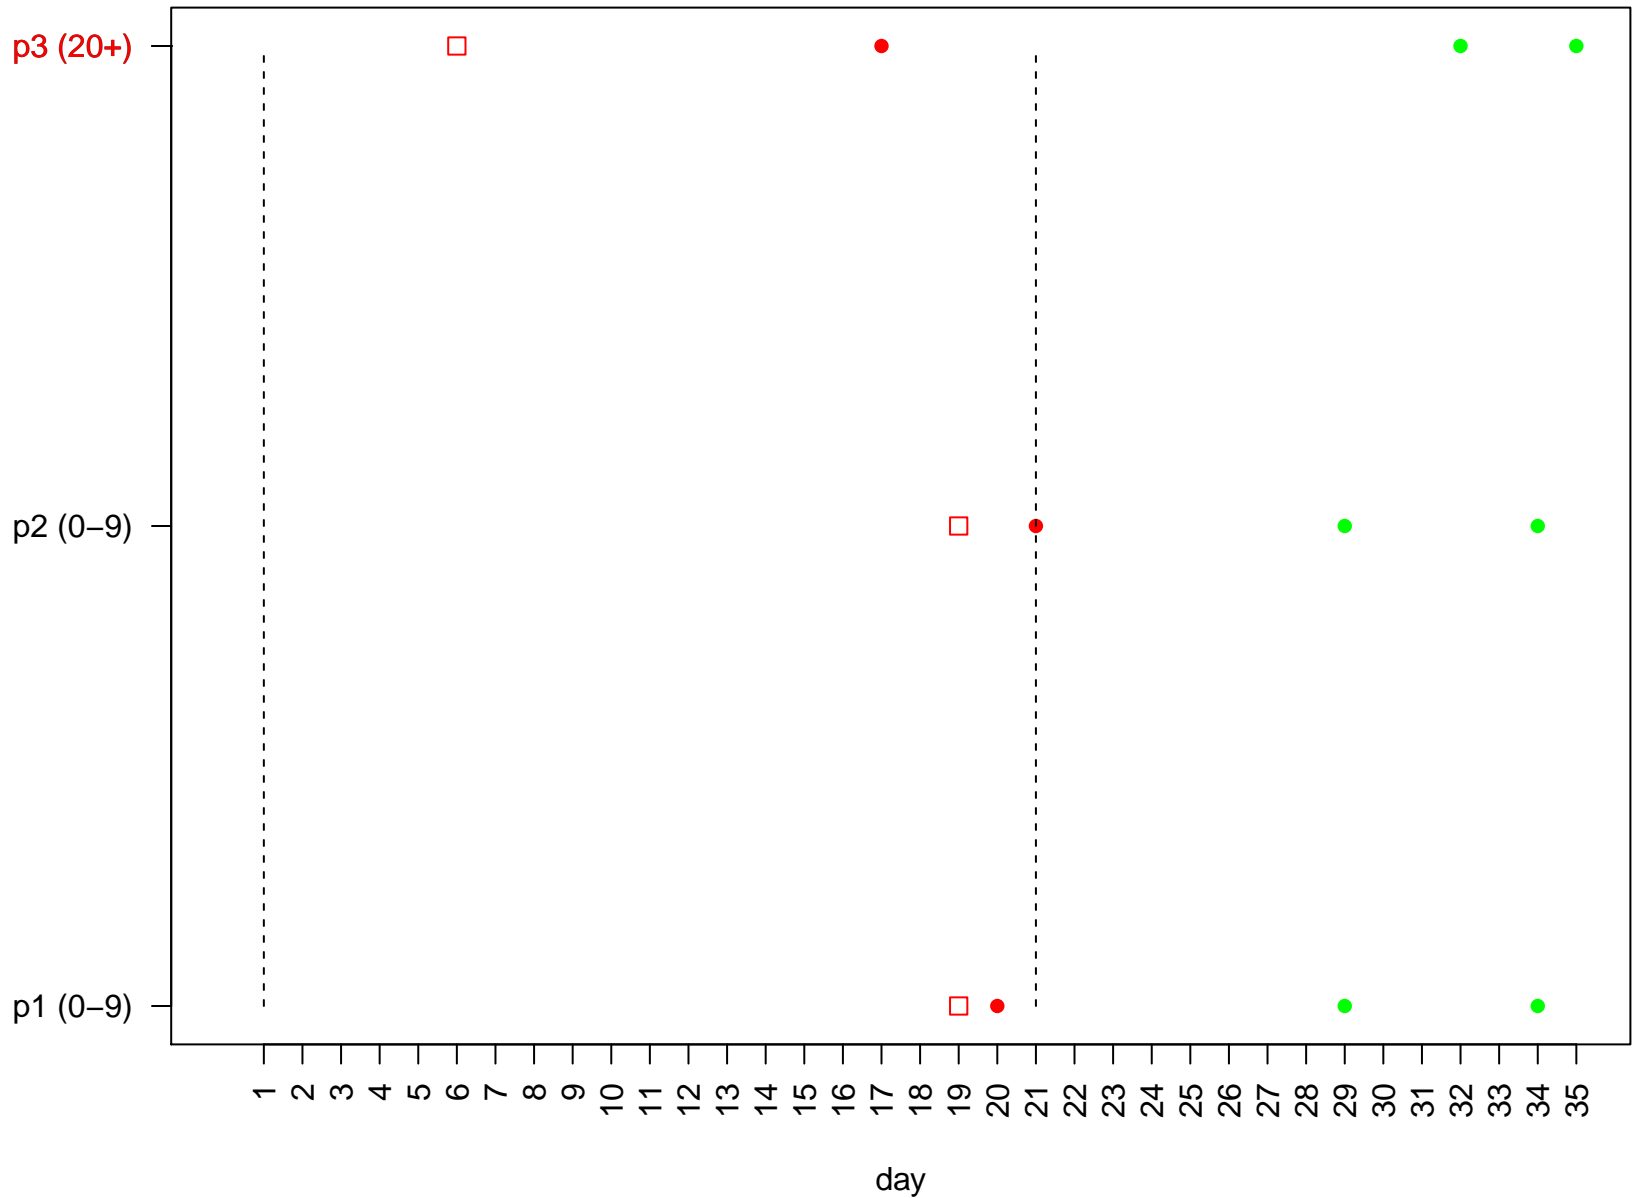



# Household 597

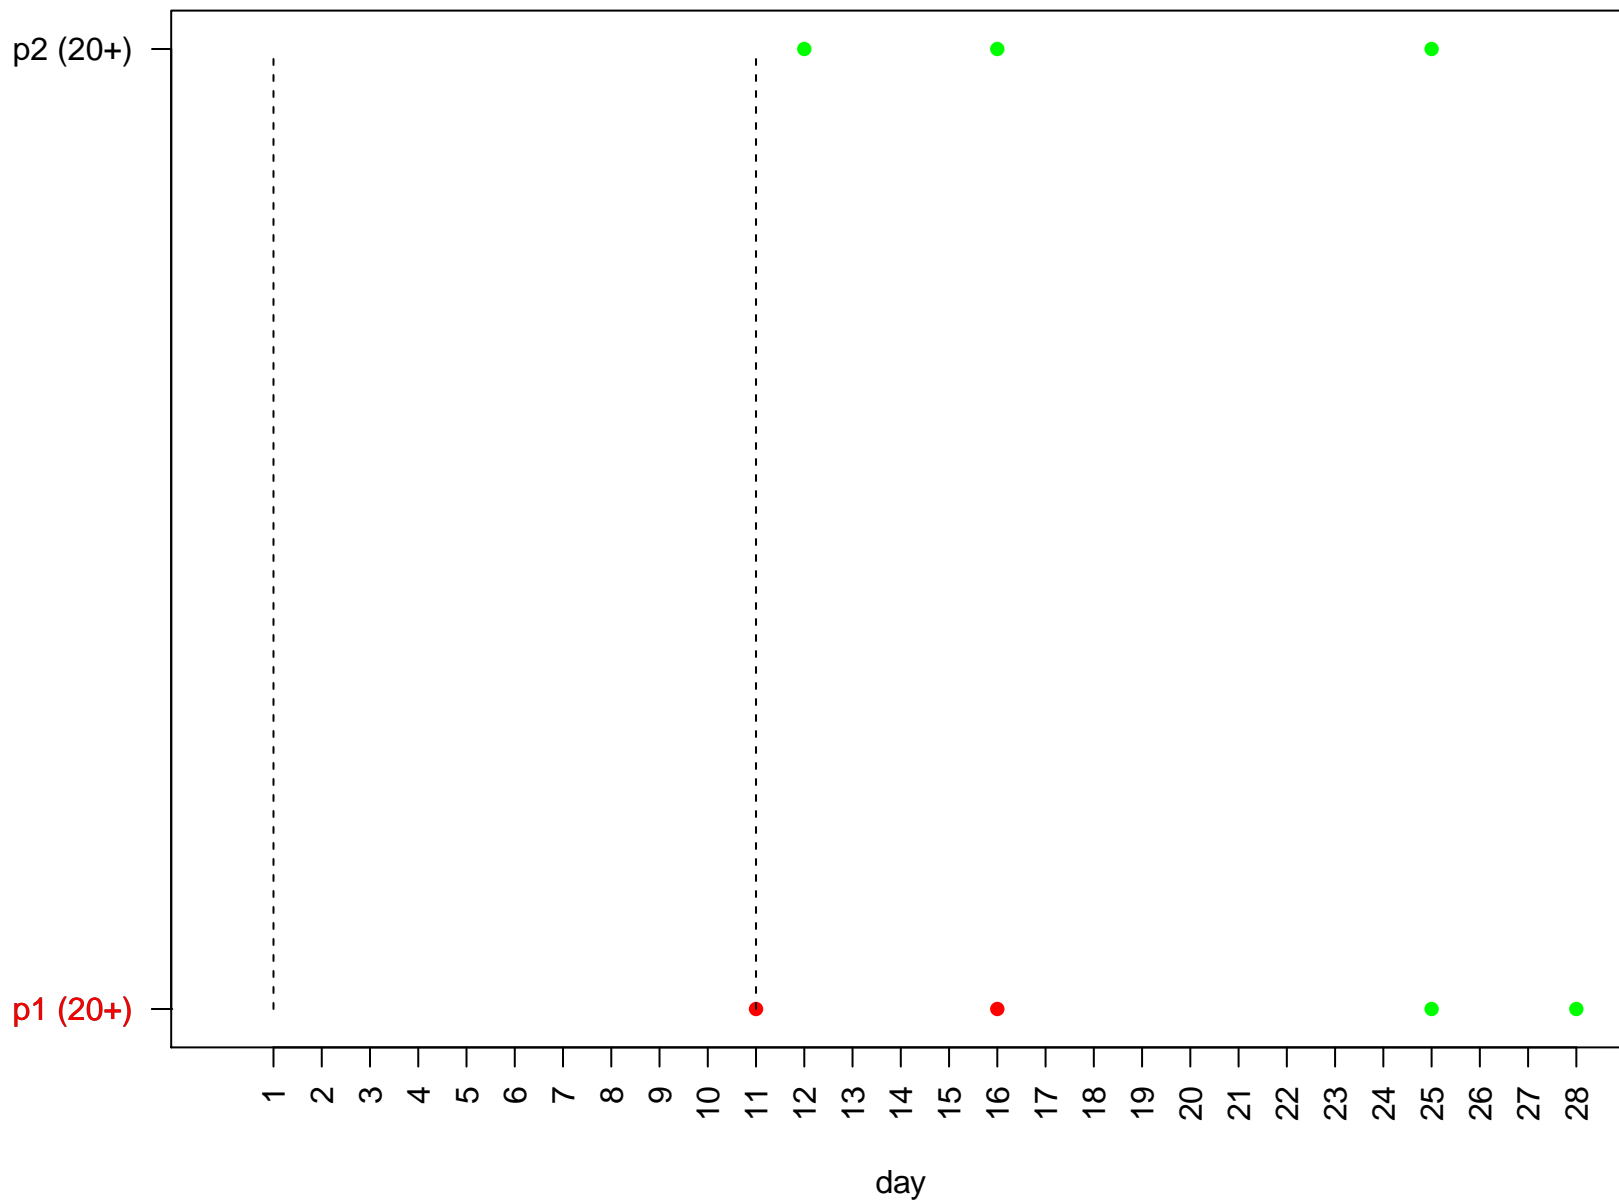

# Household 598

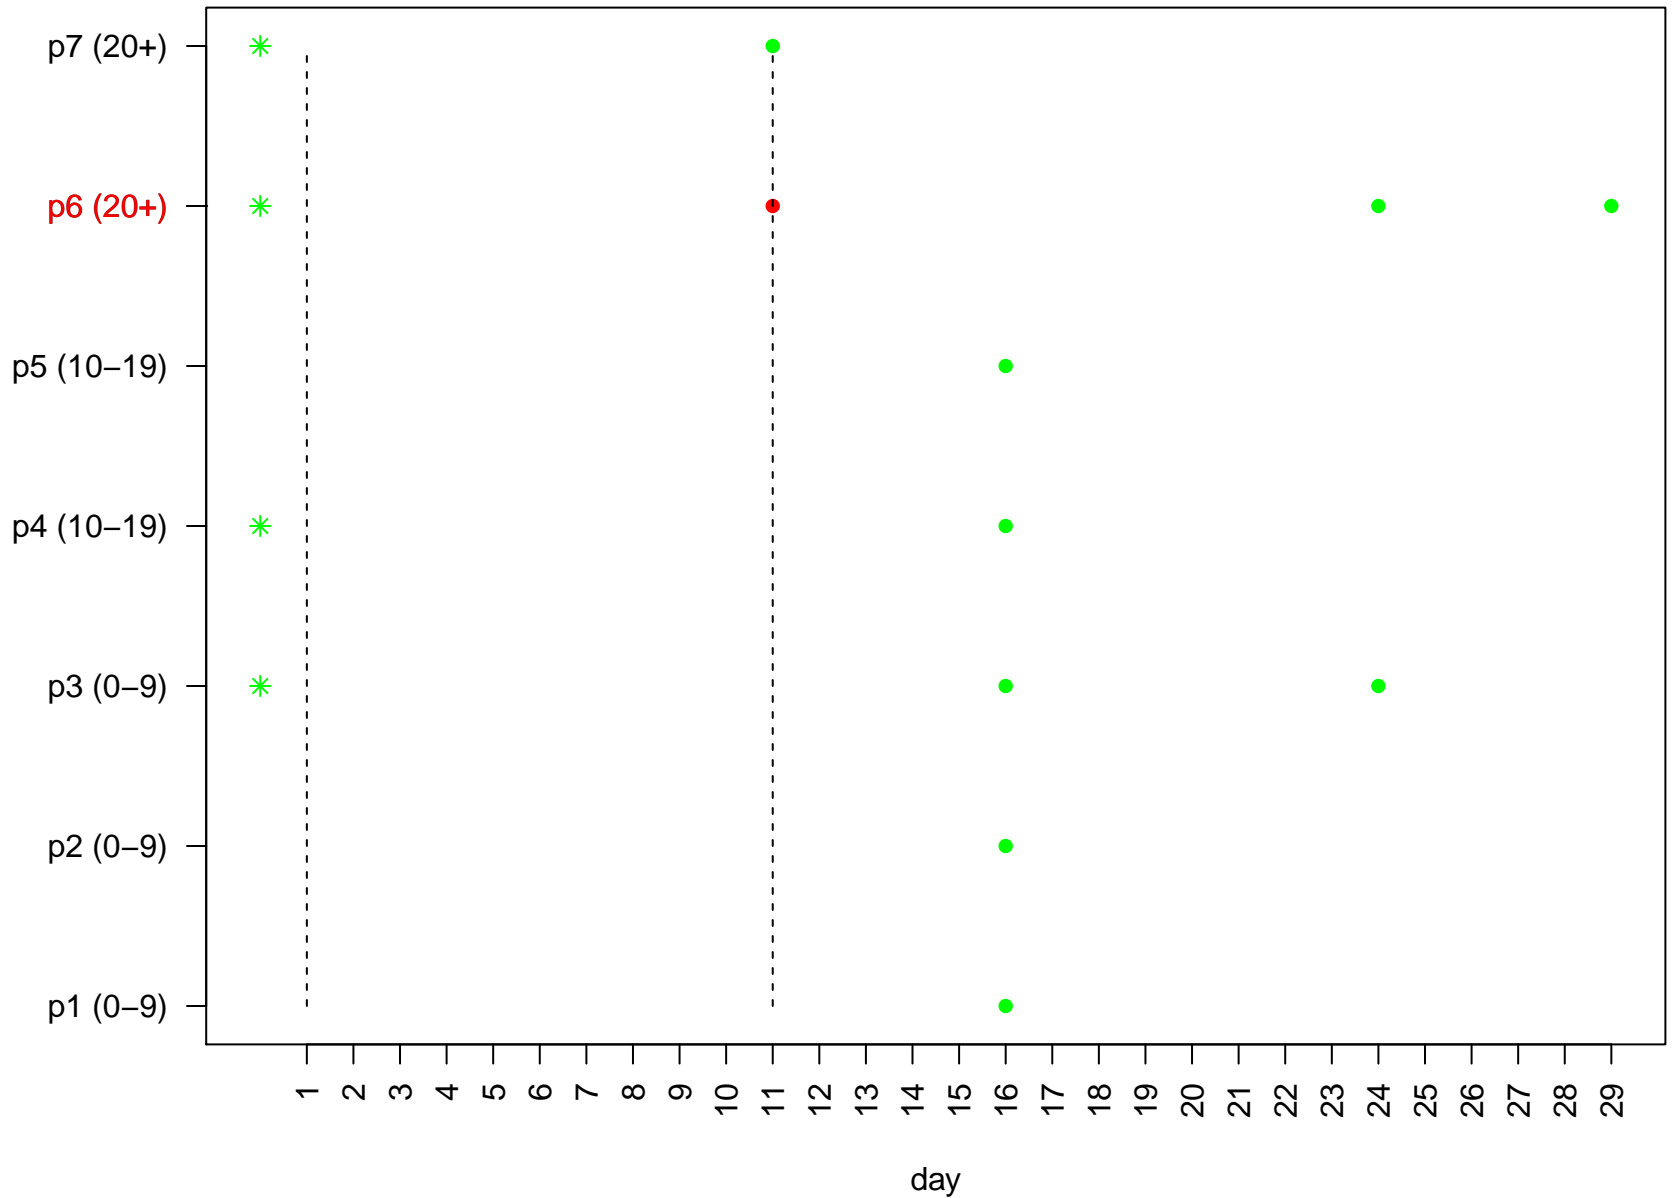

# Household 599

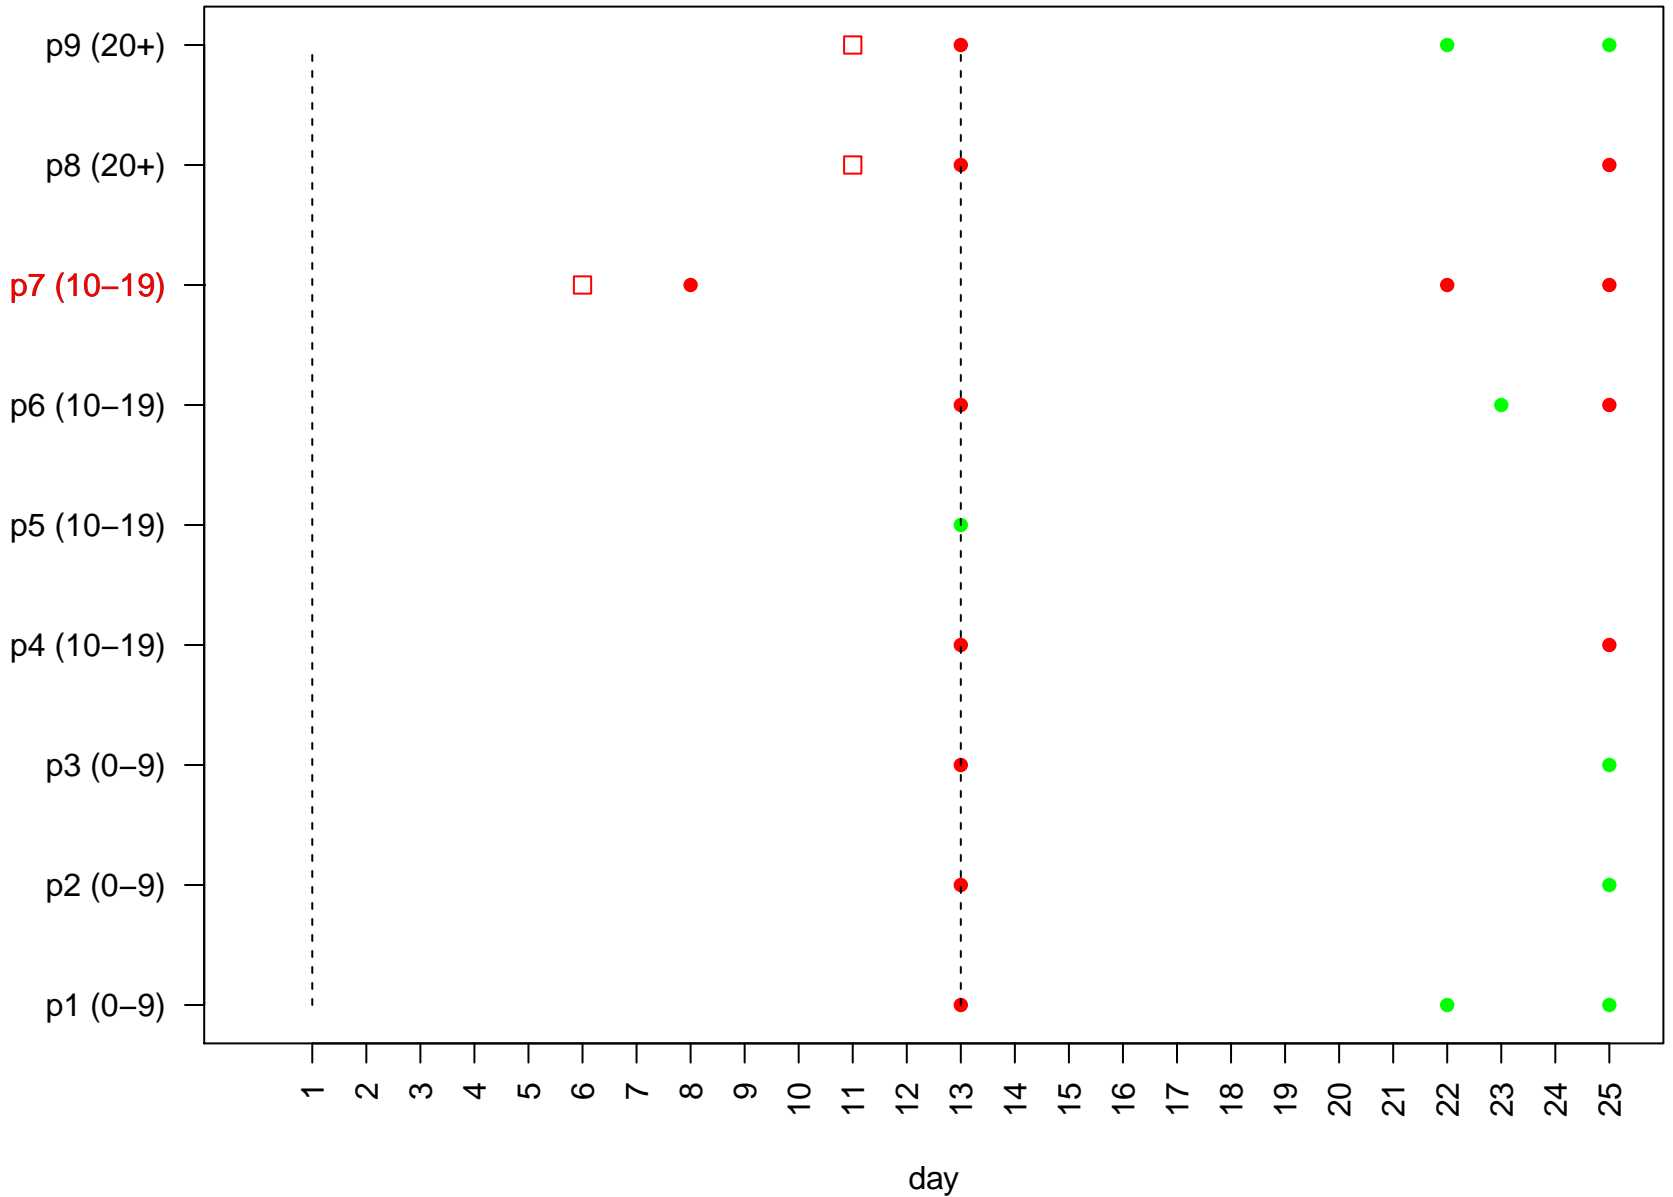

# Household 600

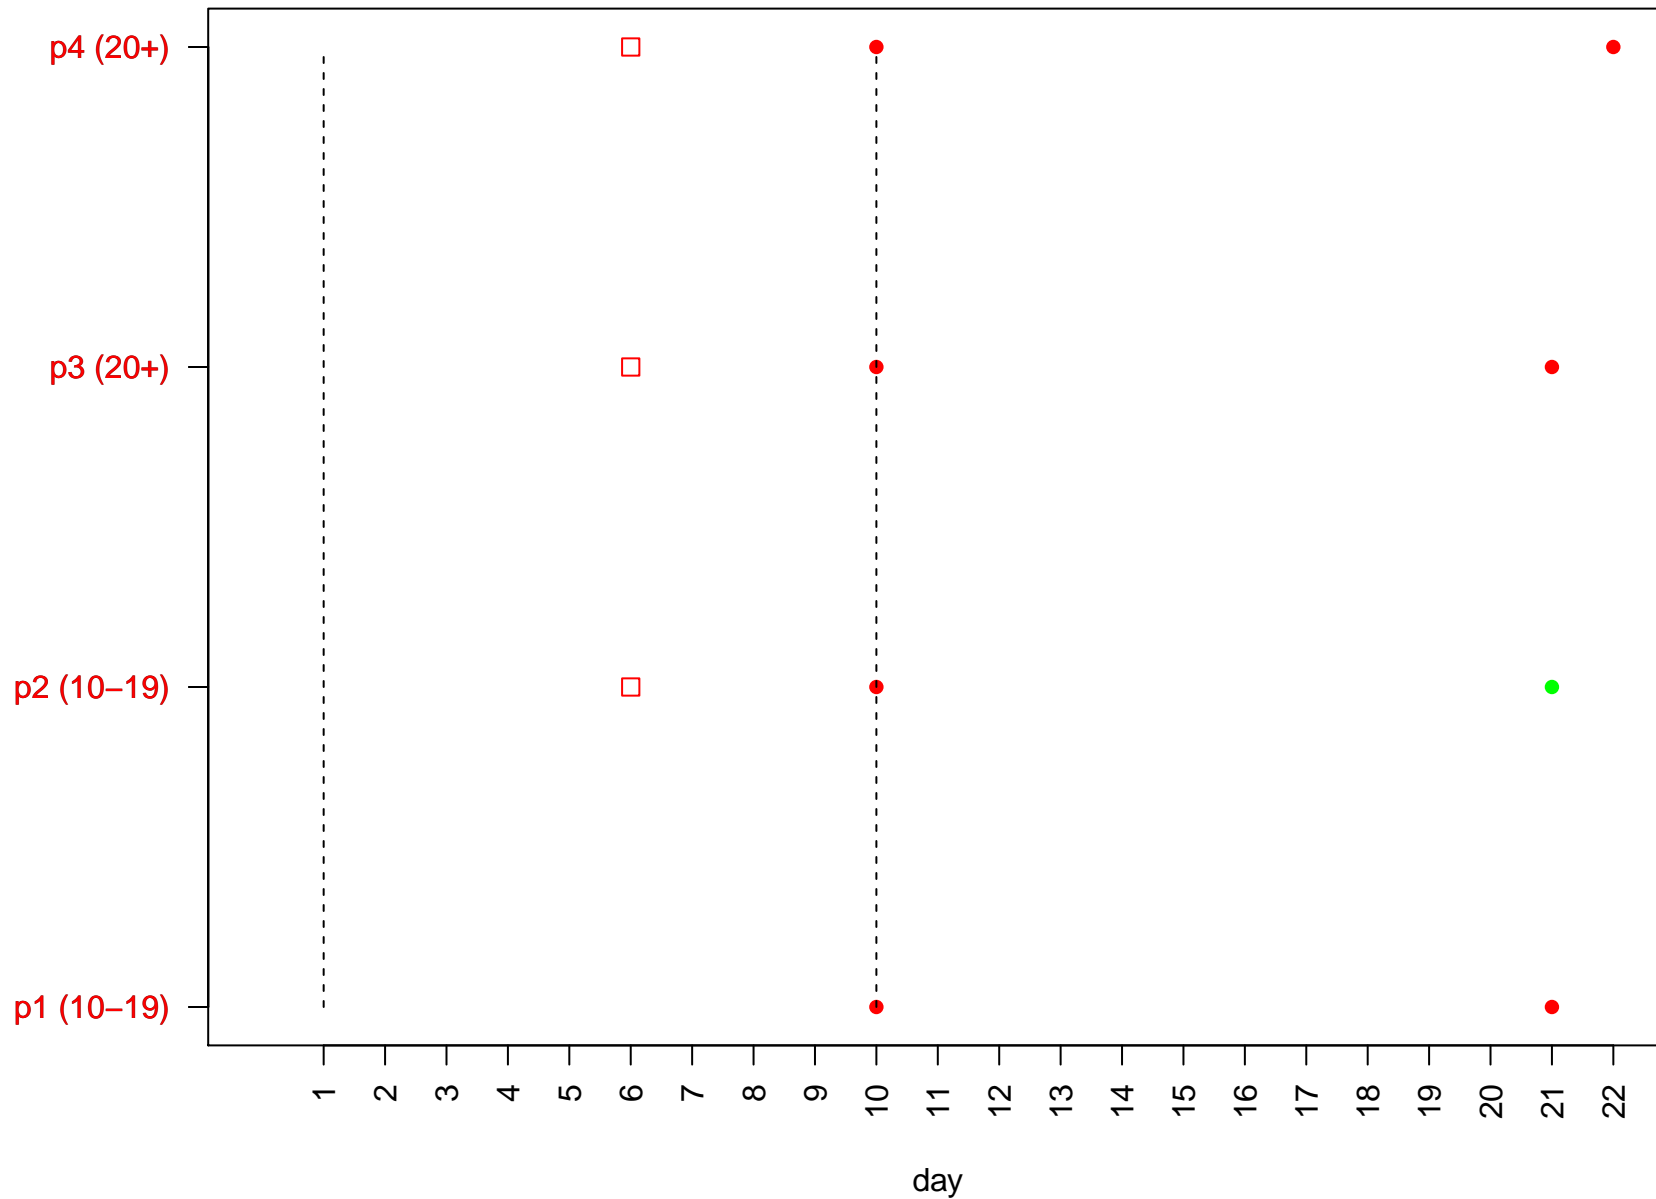

# Household 601

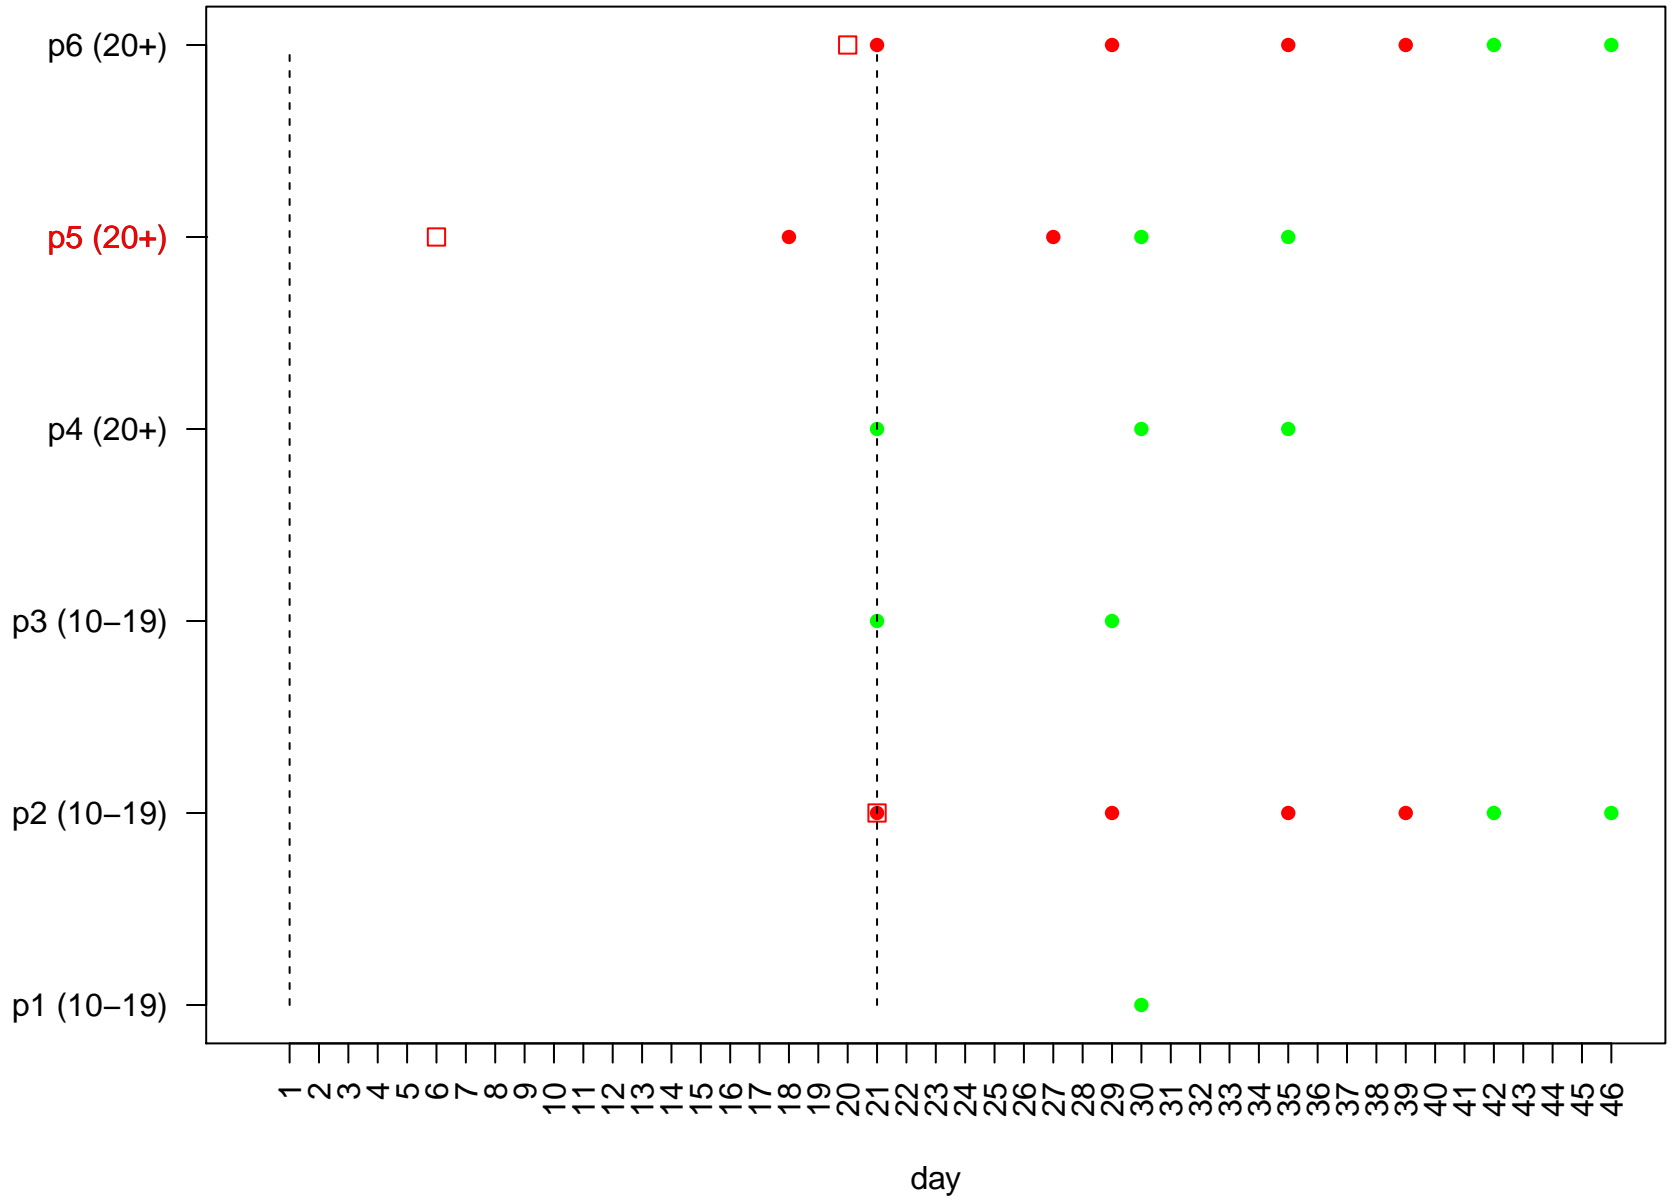

# Household 602

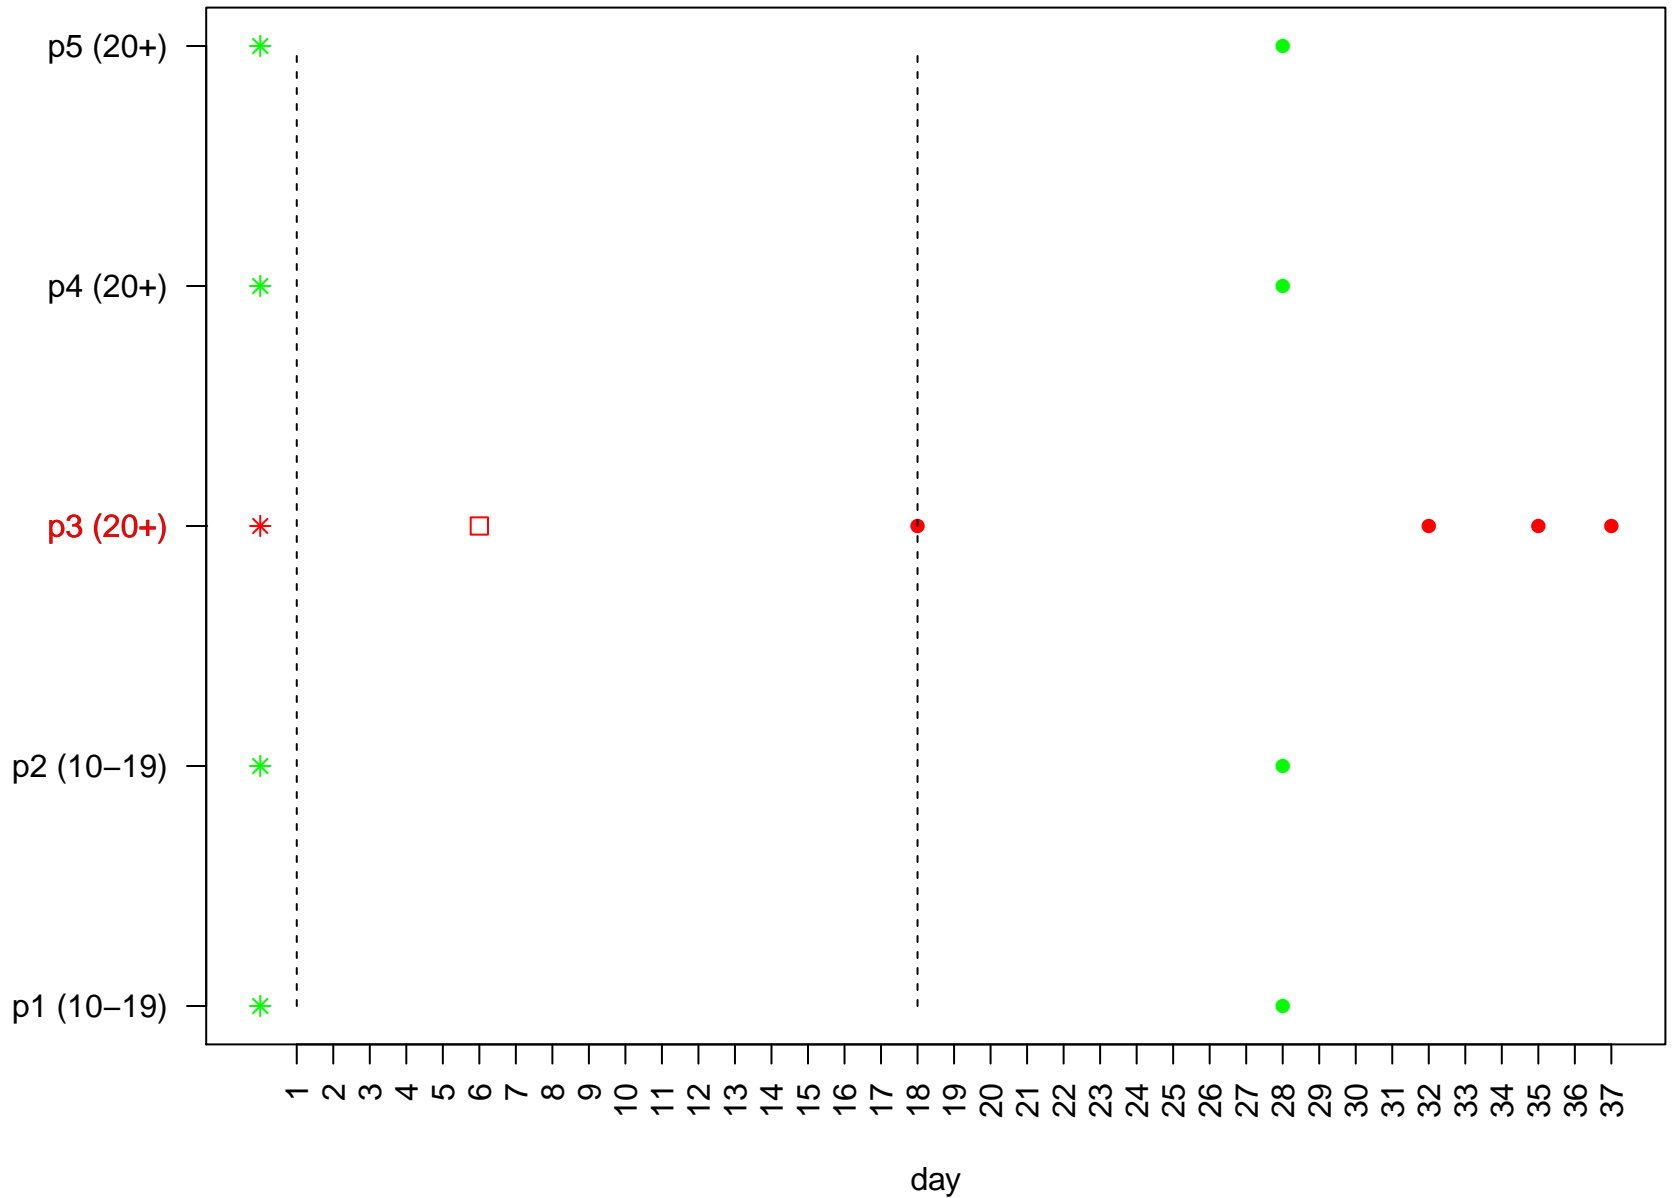

# Household 603

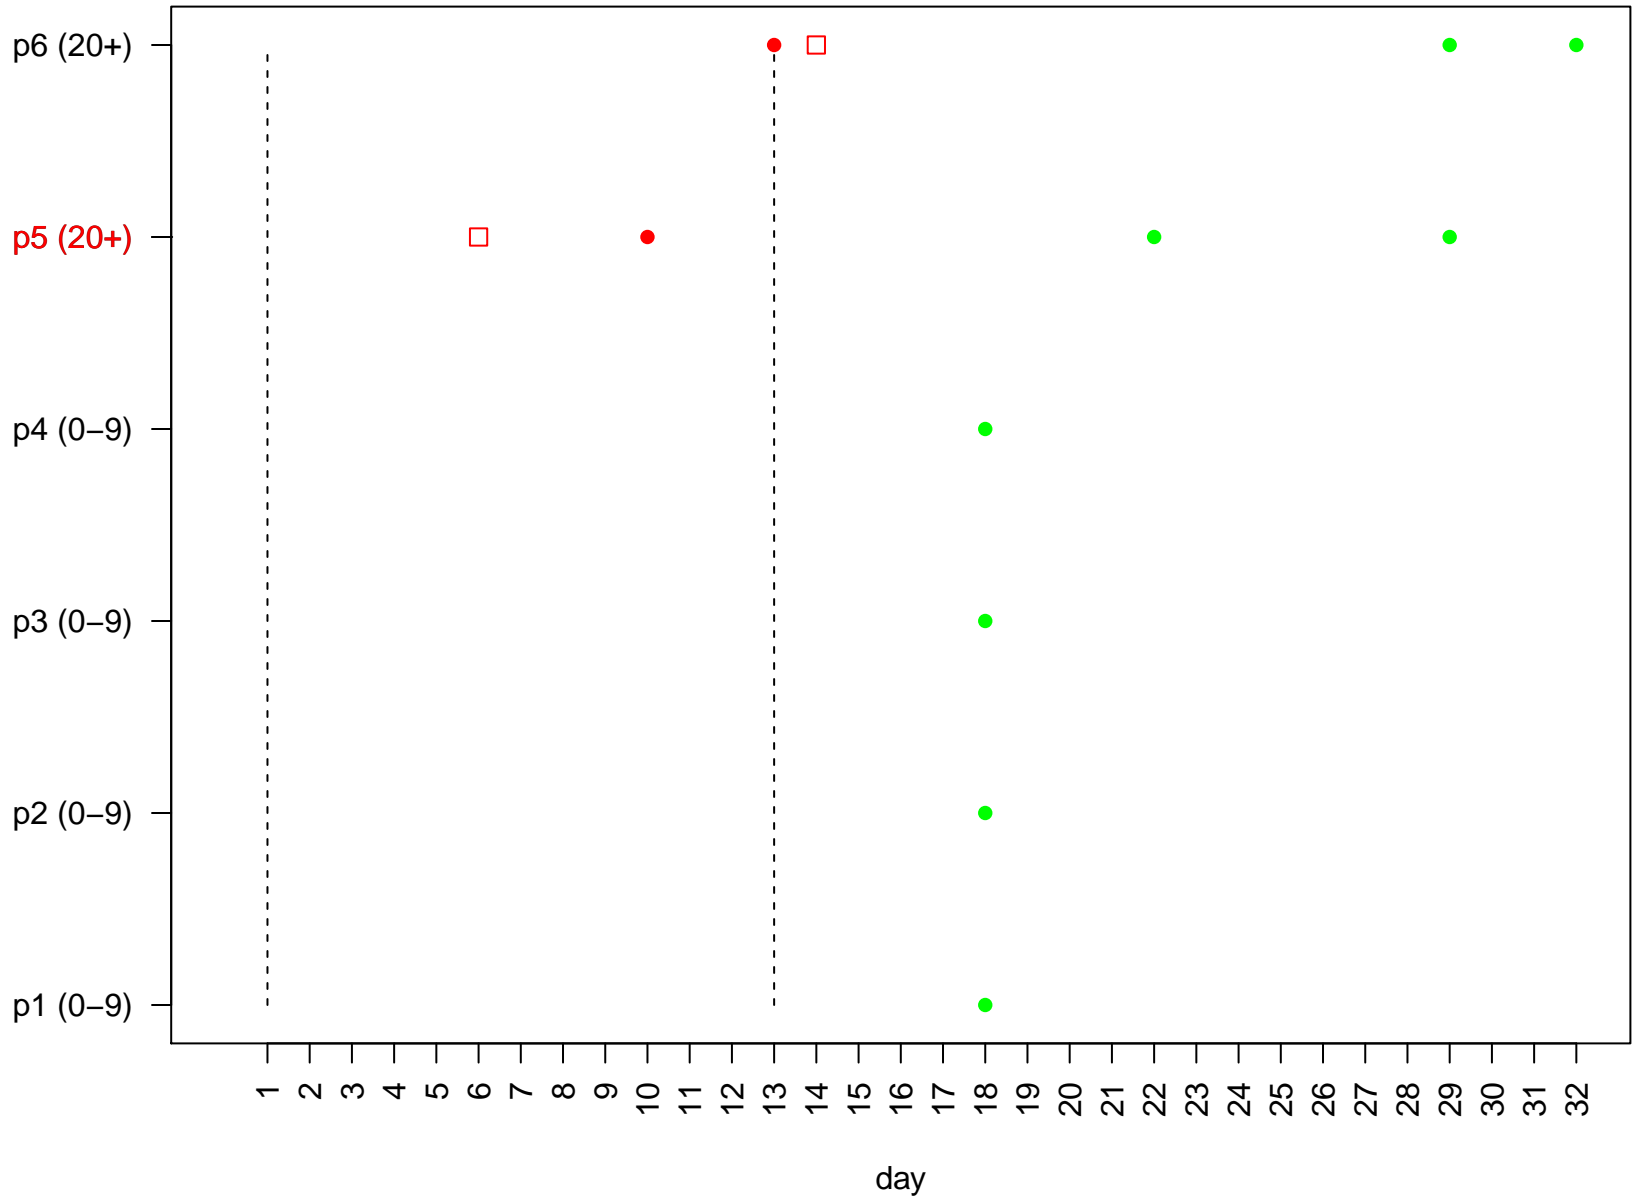

# Household 604

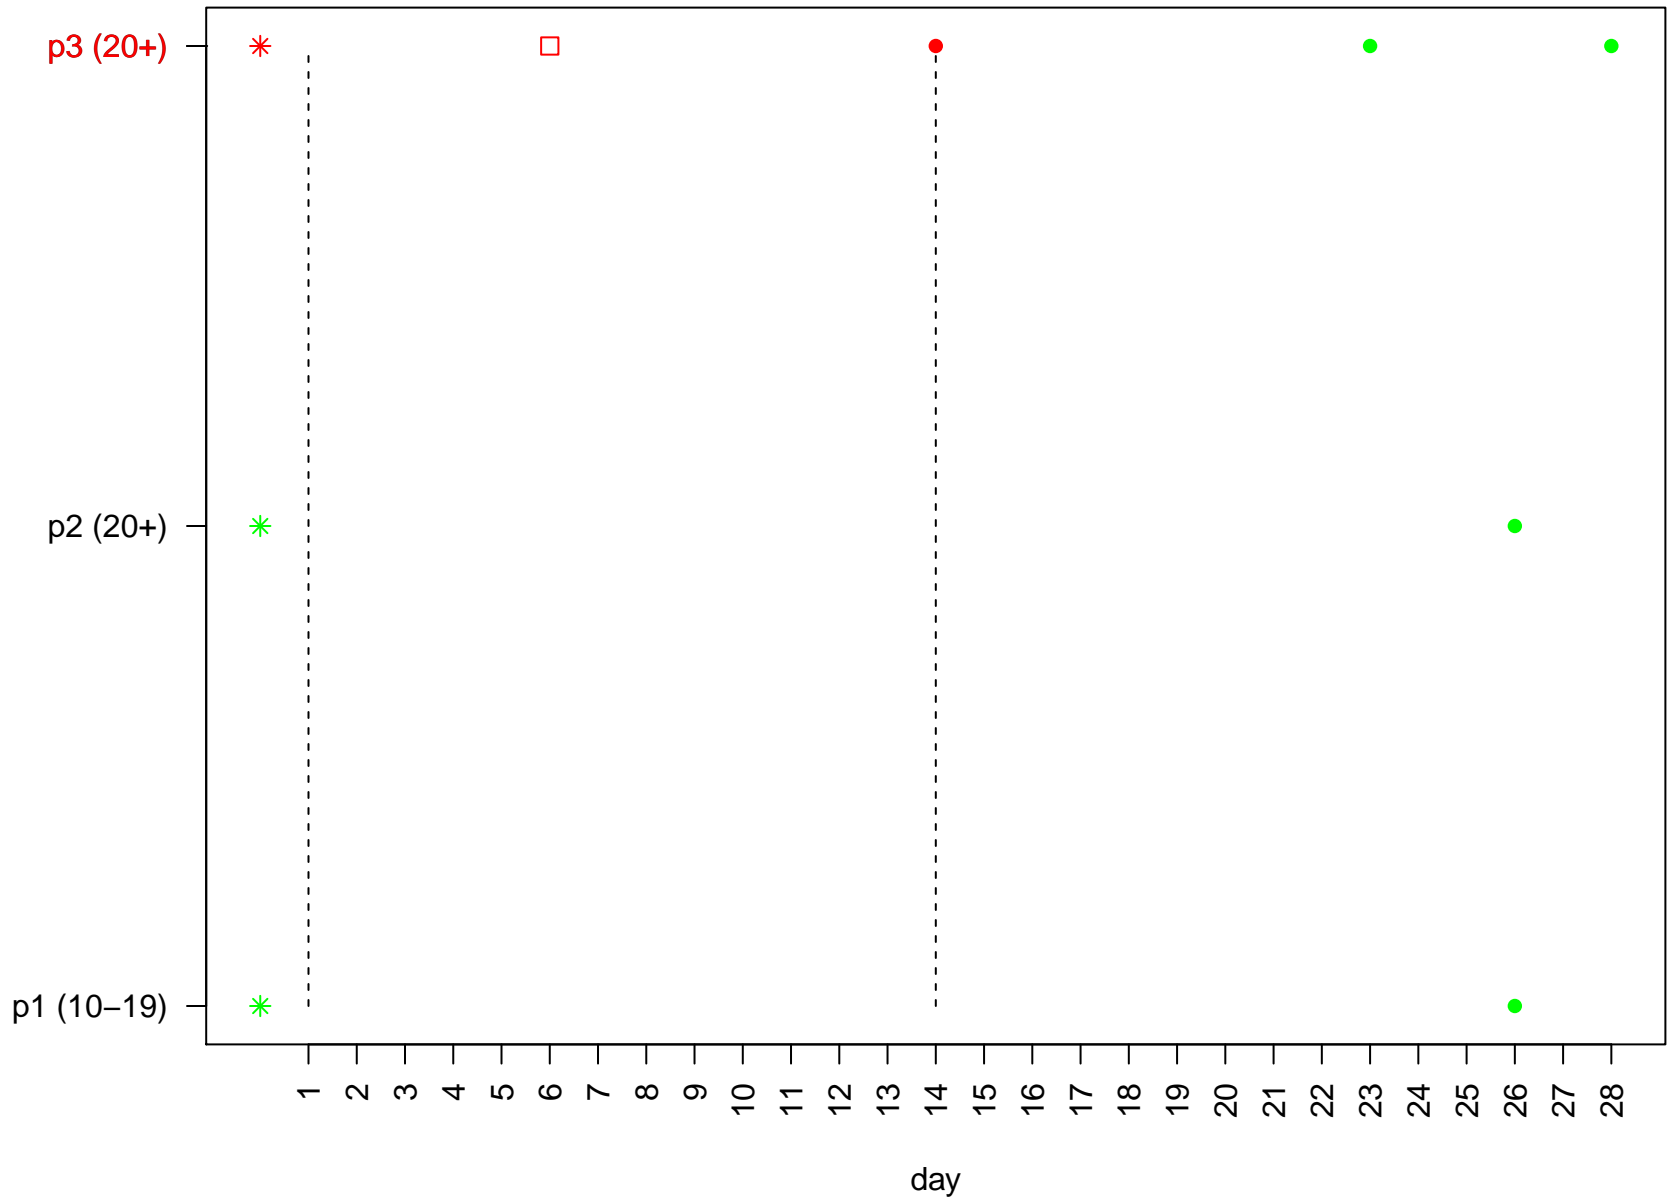





# Household 606

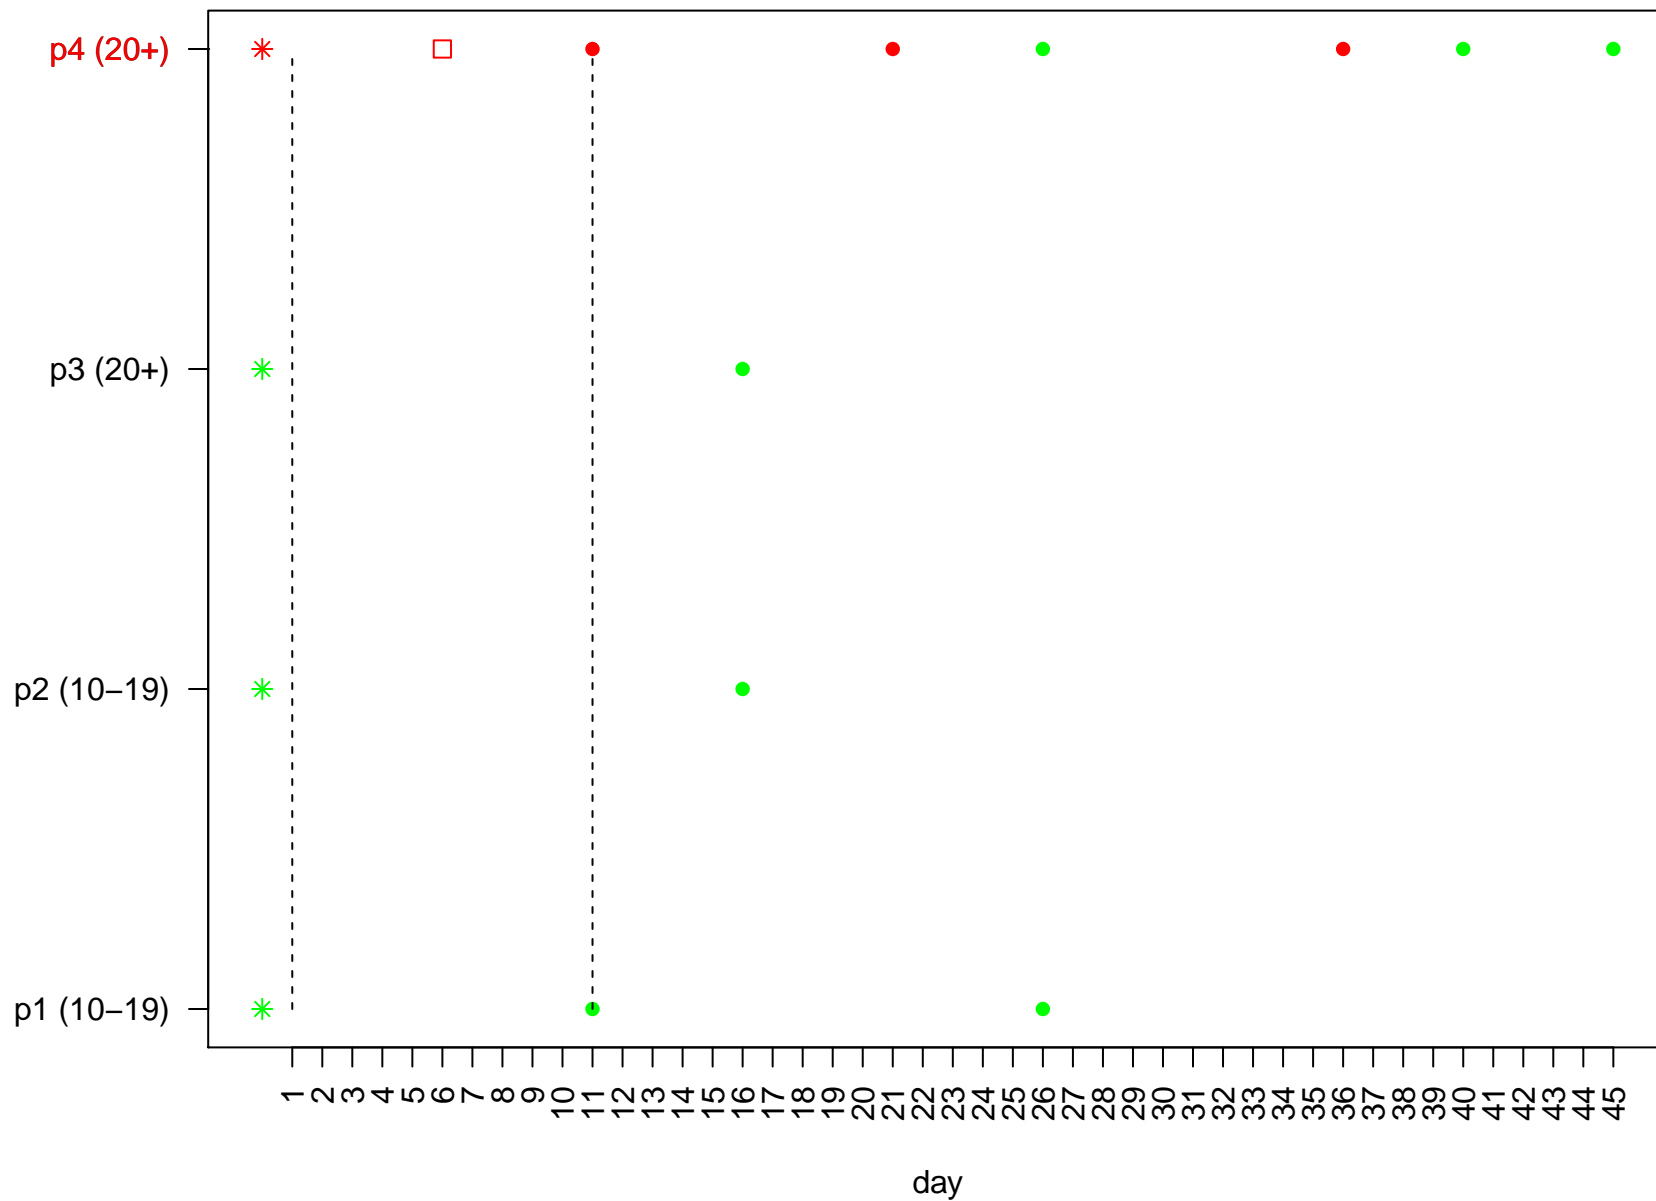

# Household 607

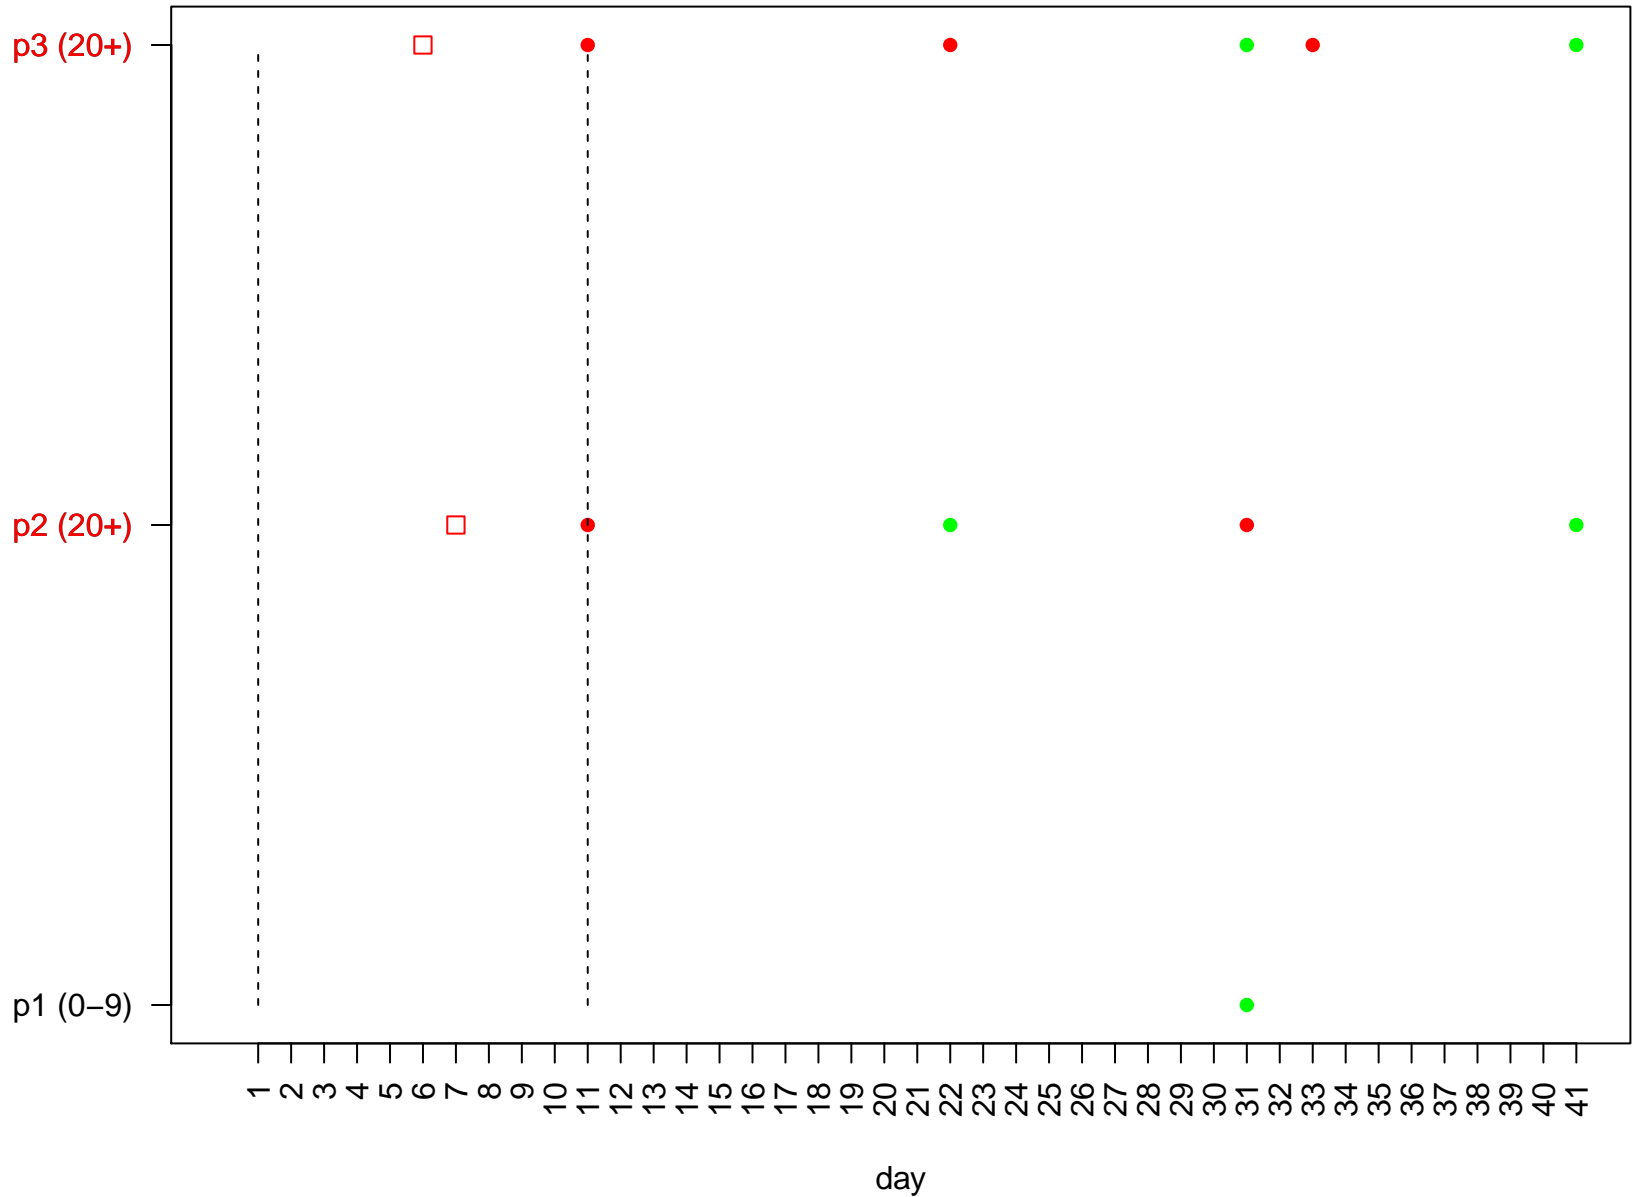



# Household 609

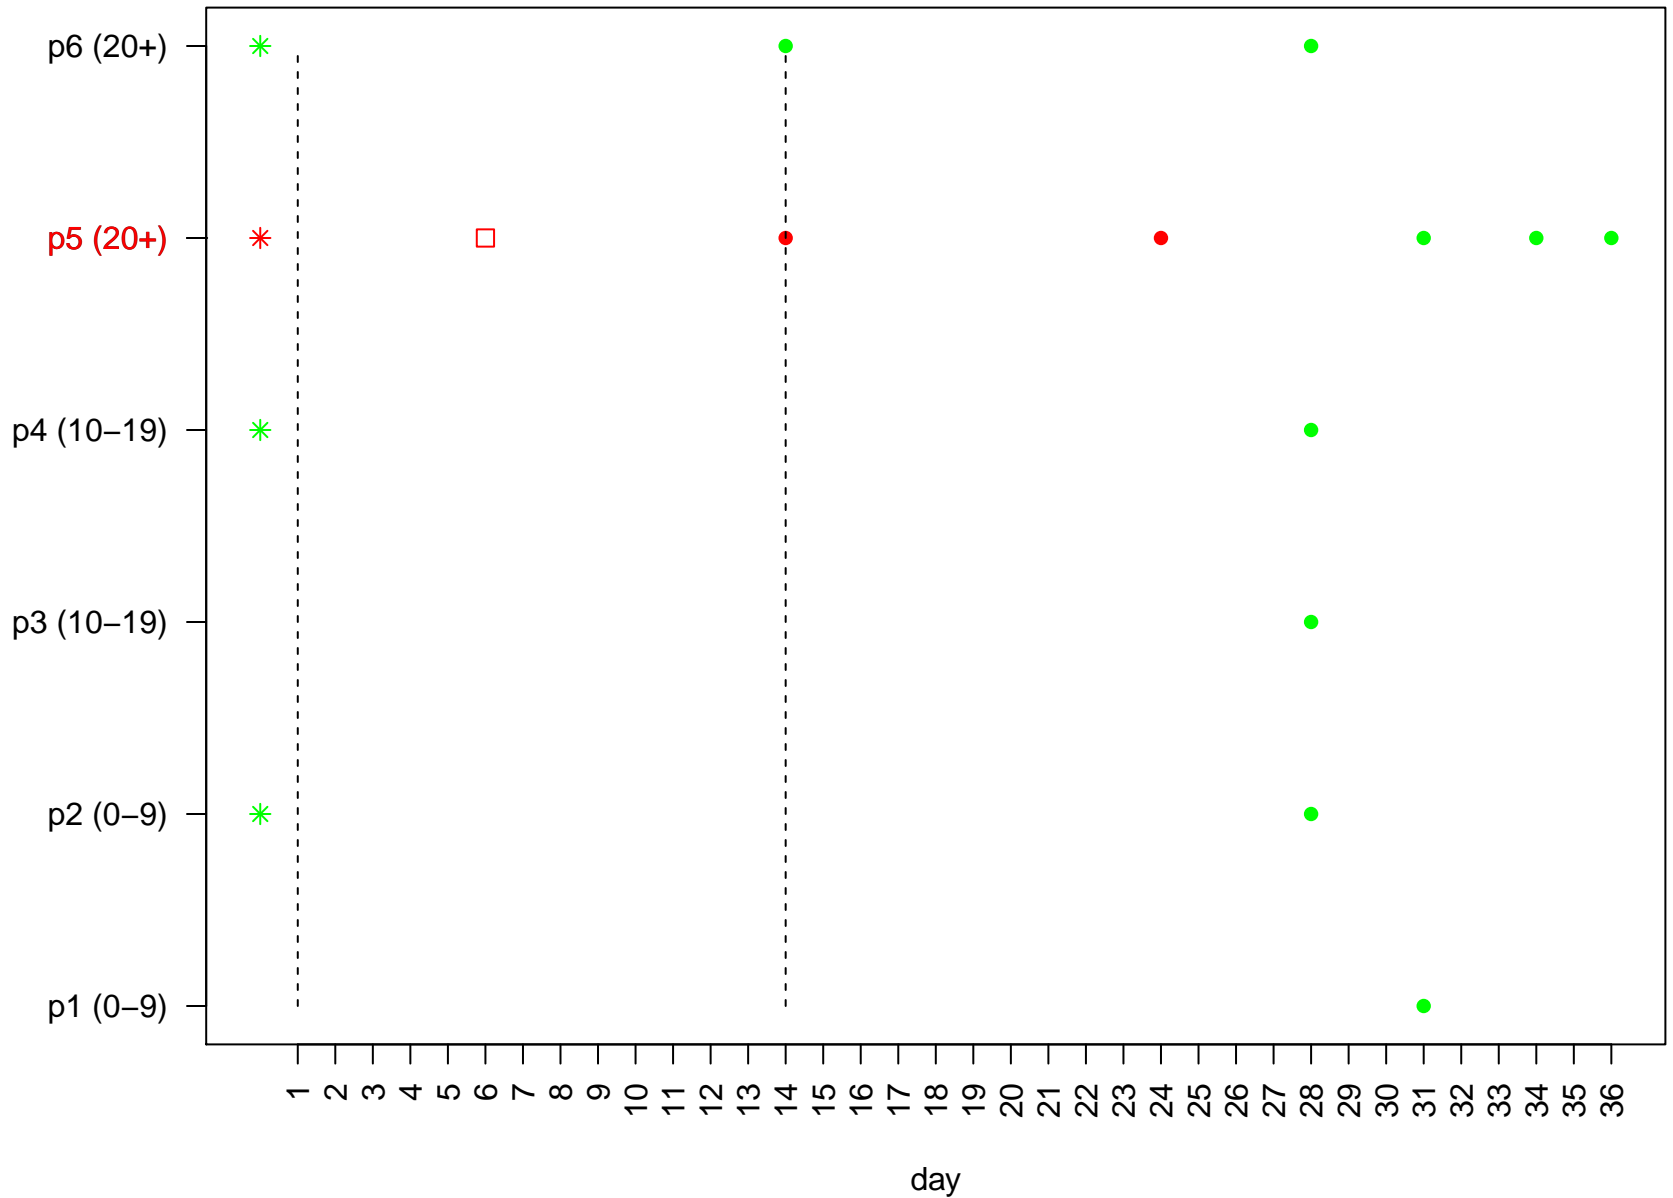

# Household 610

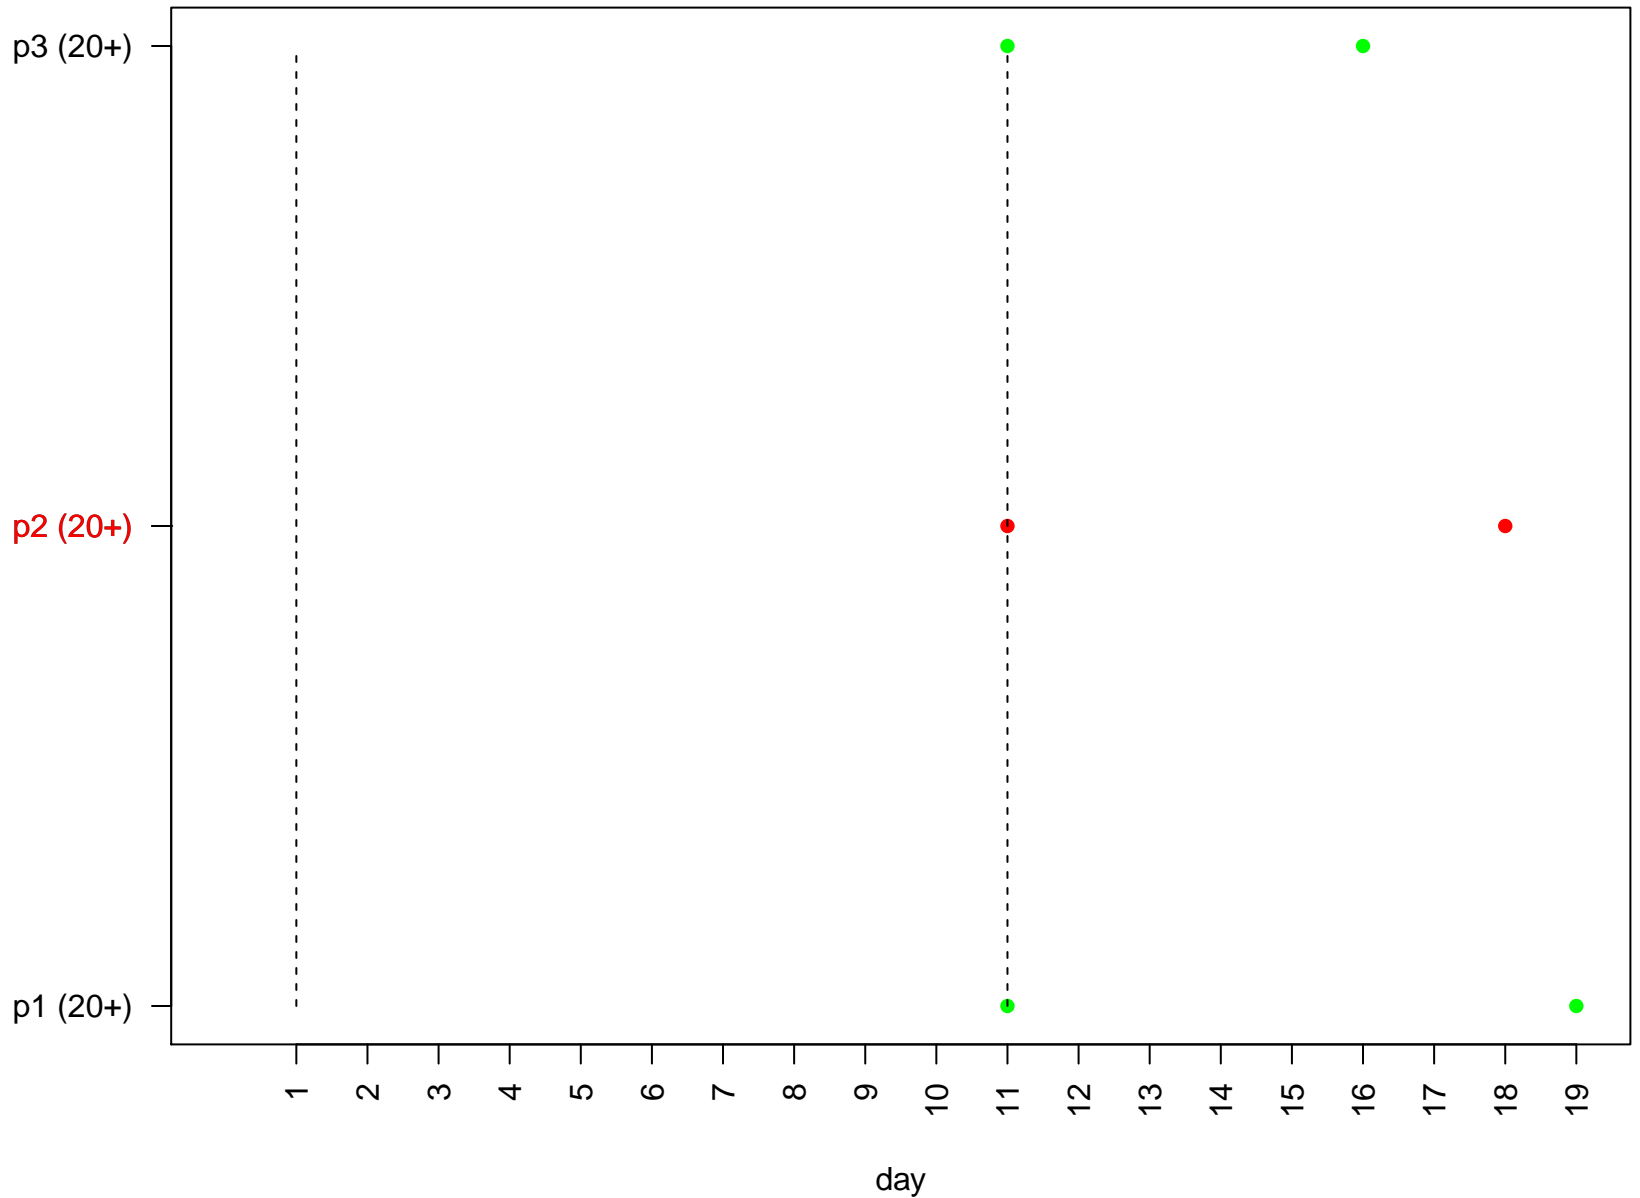

# Household 611

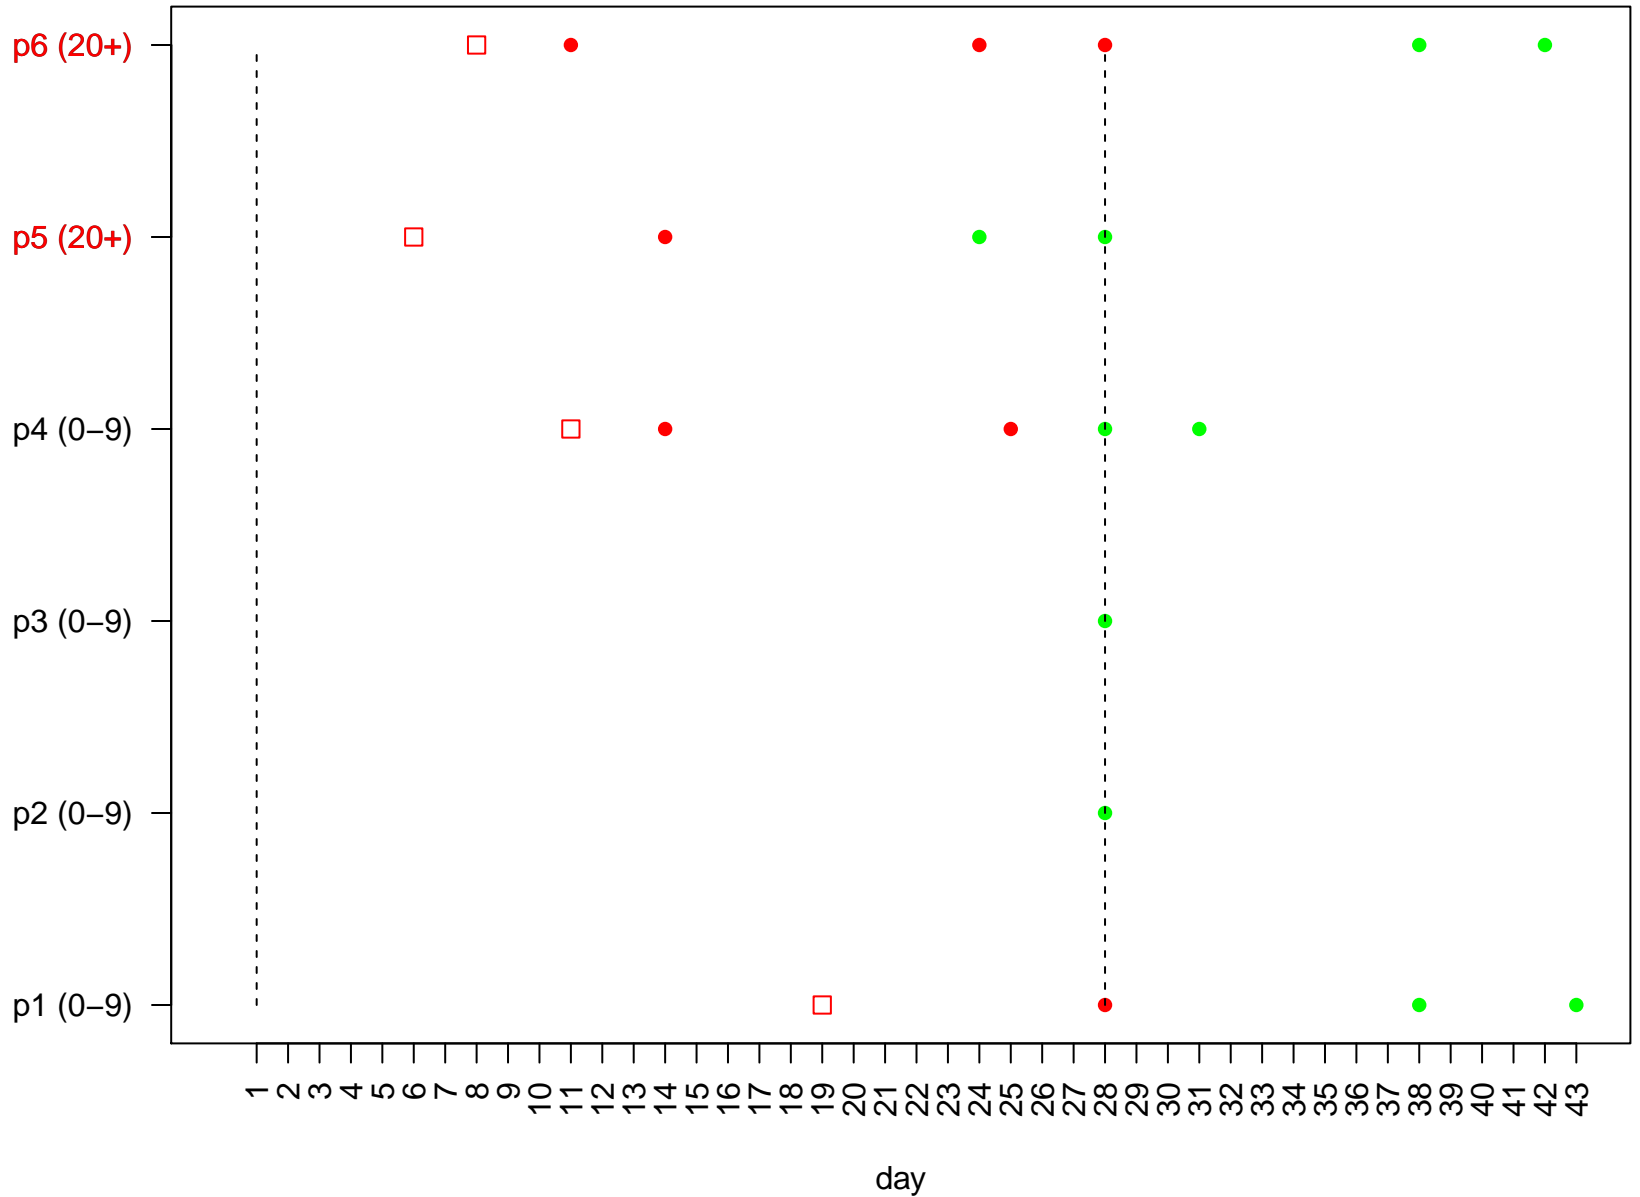

# Household 612

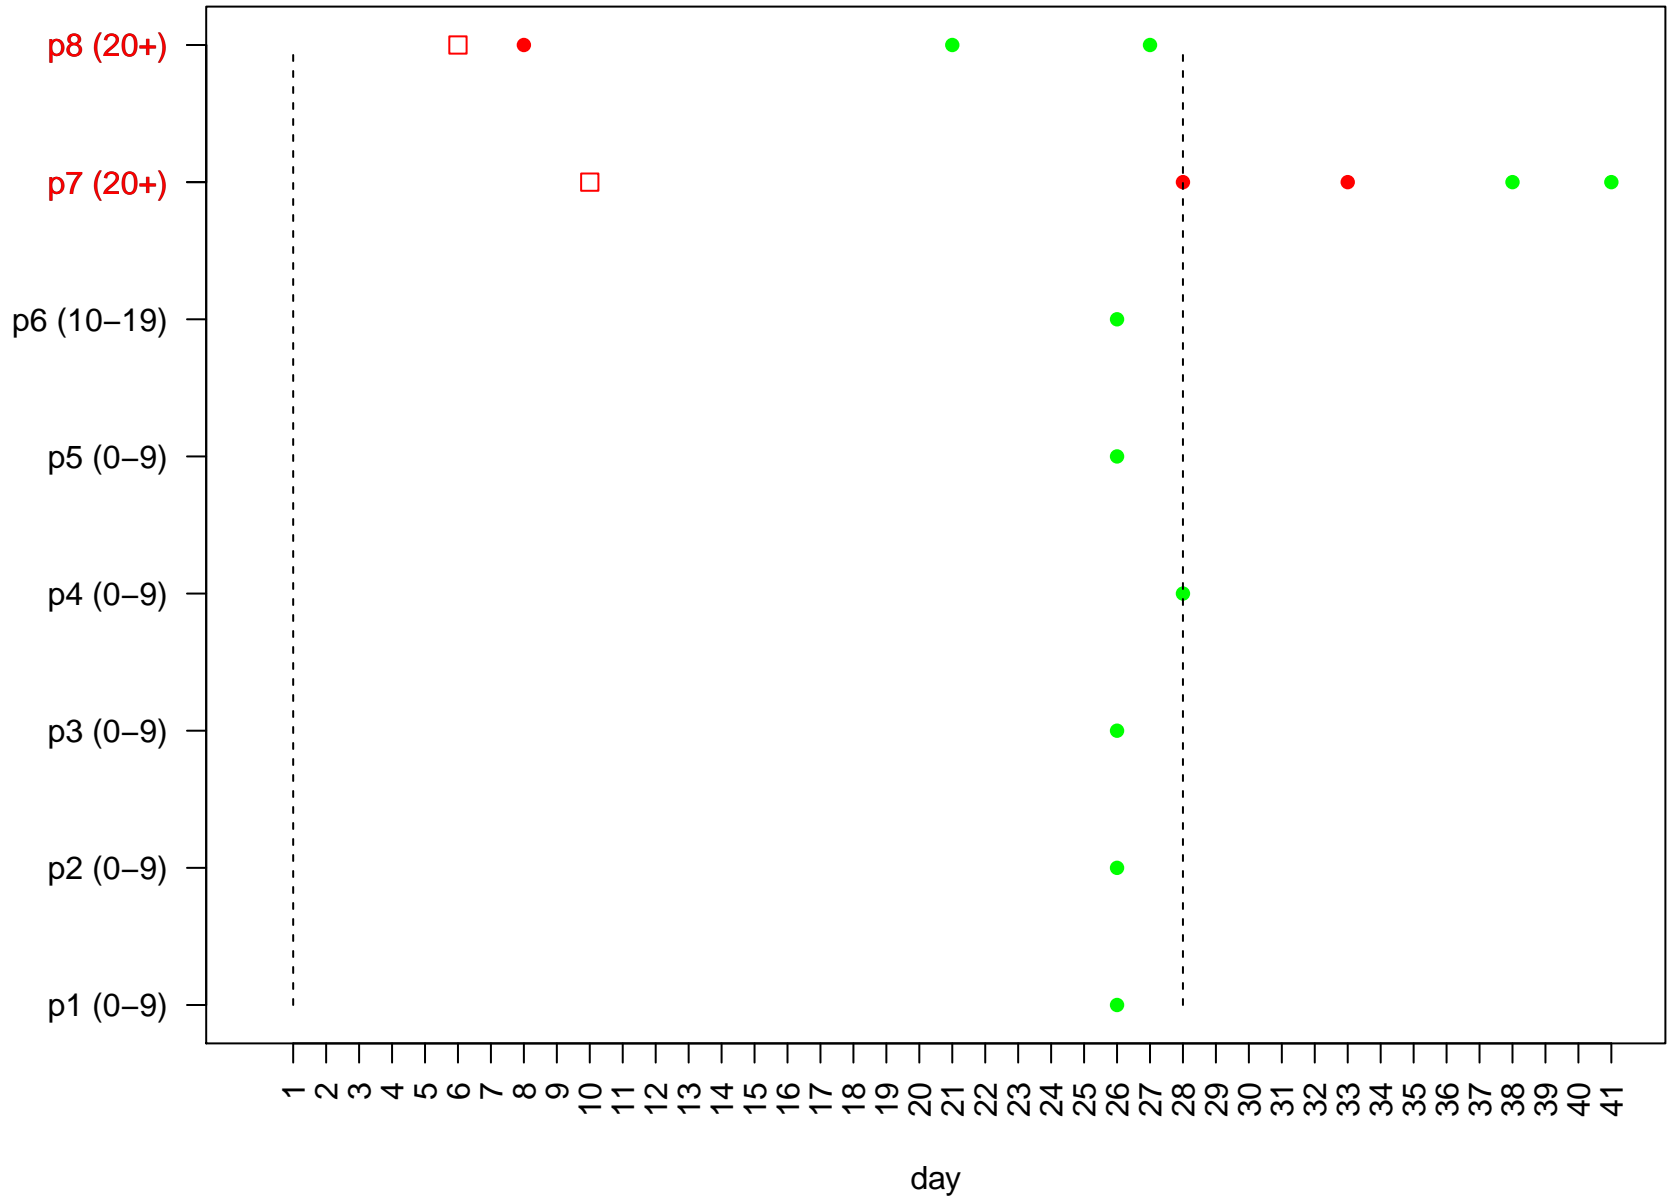





# Household 614

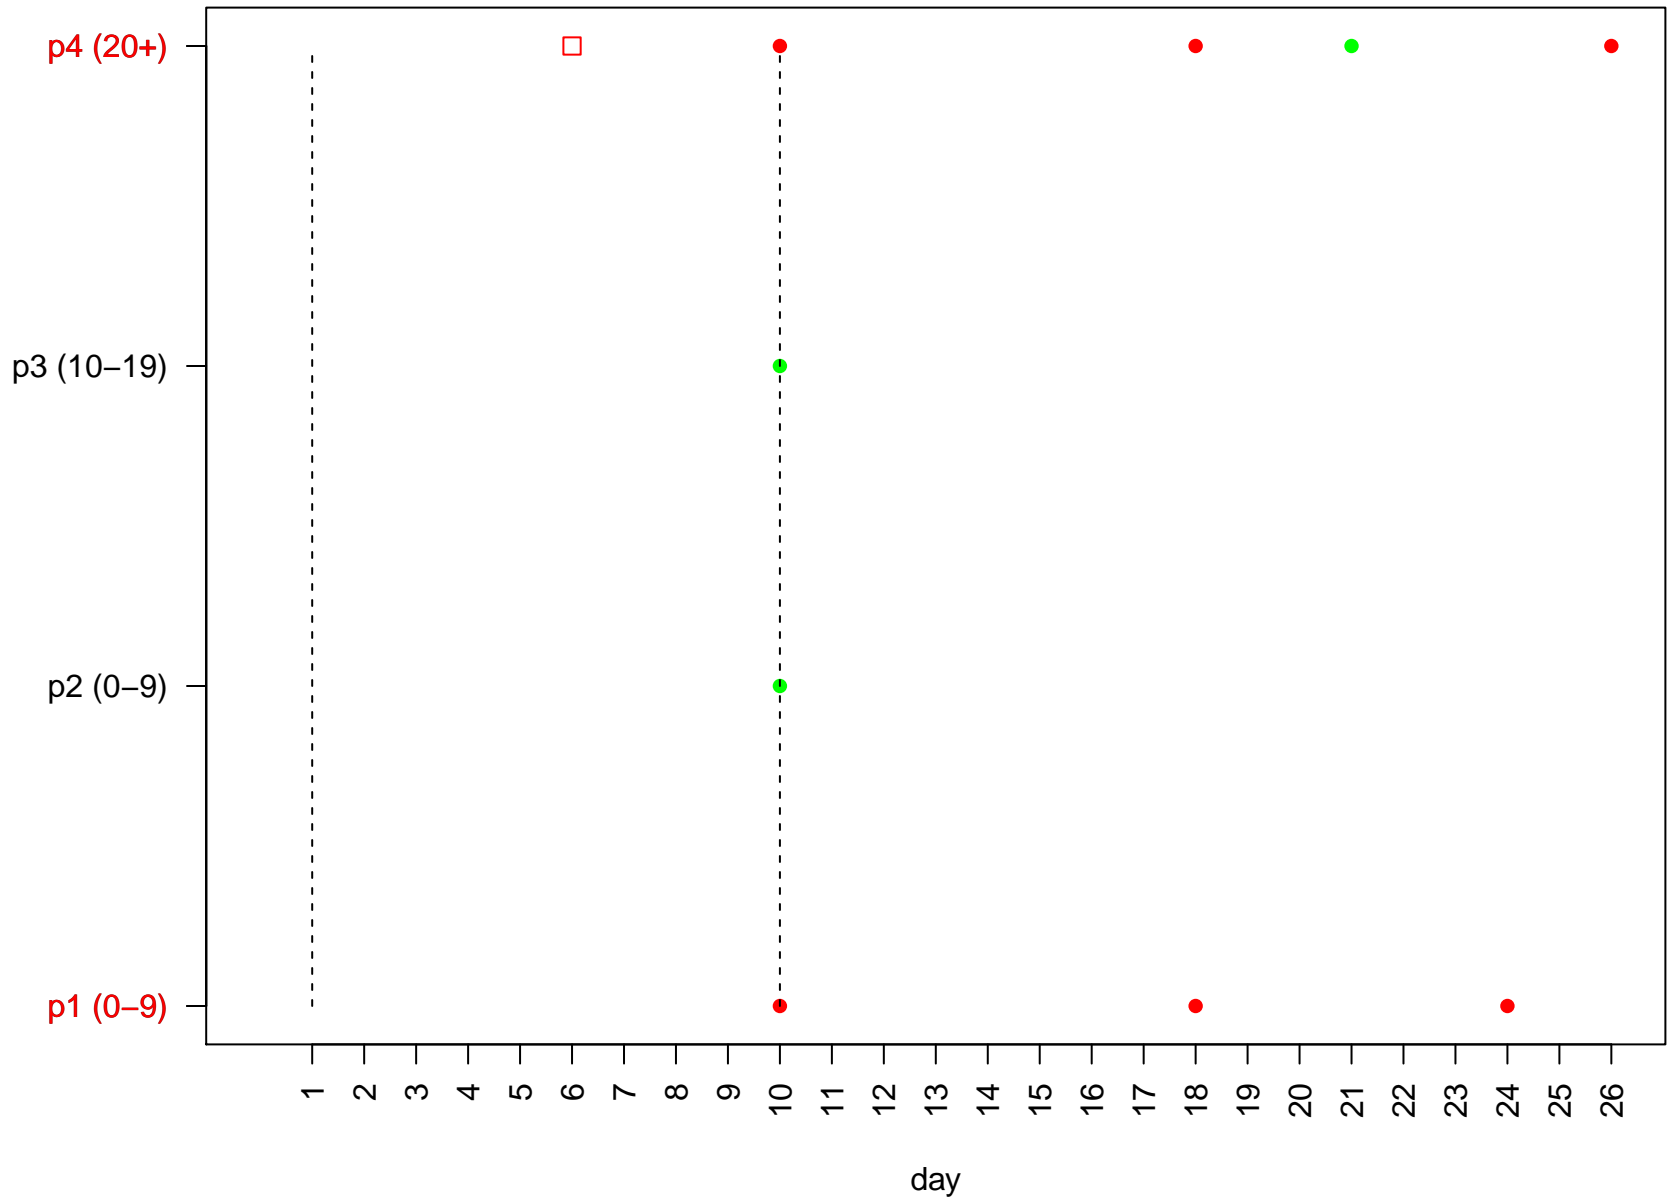

# Household 615

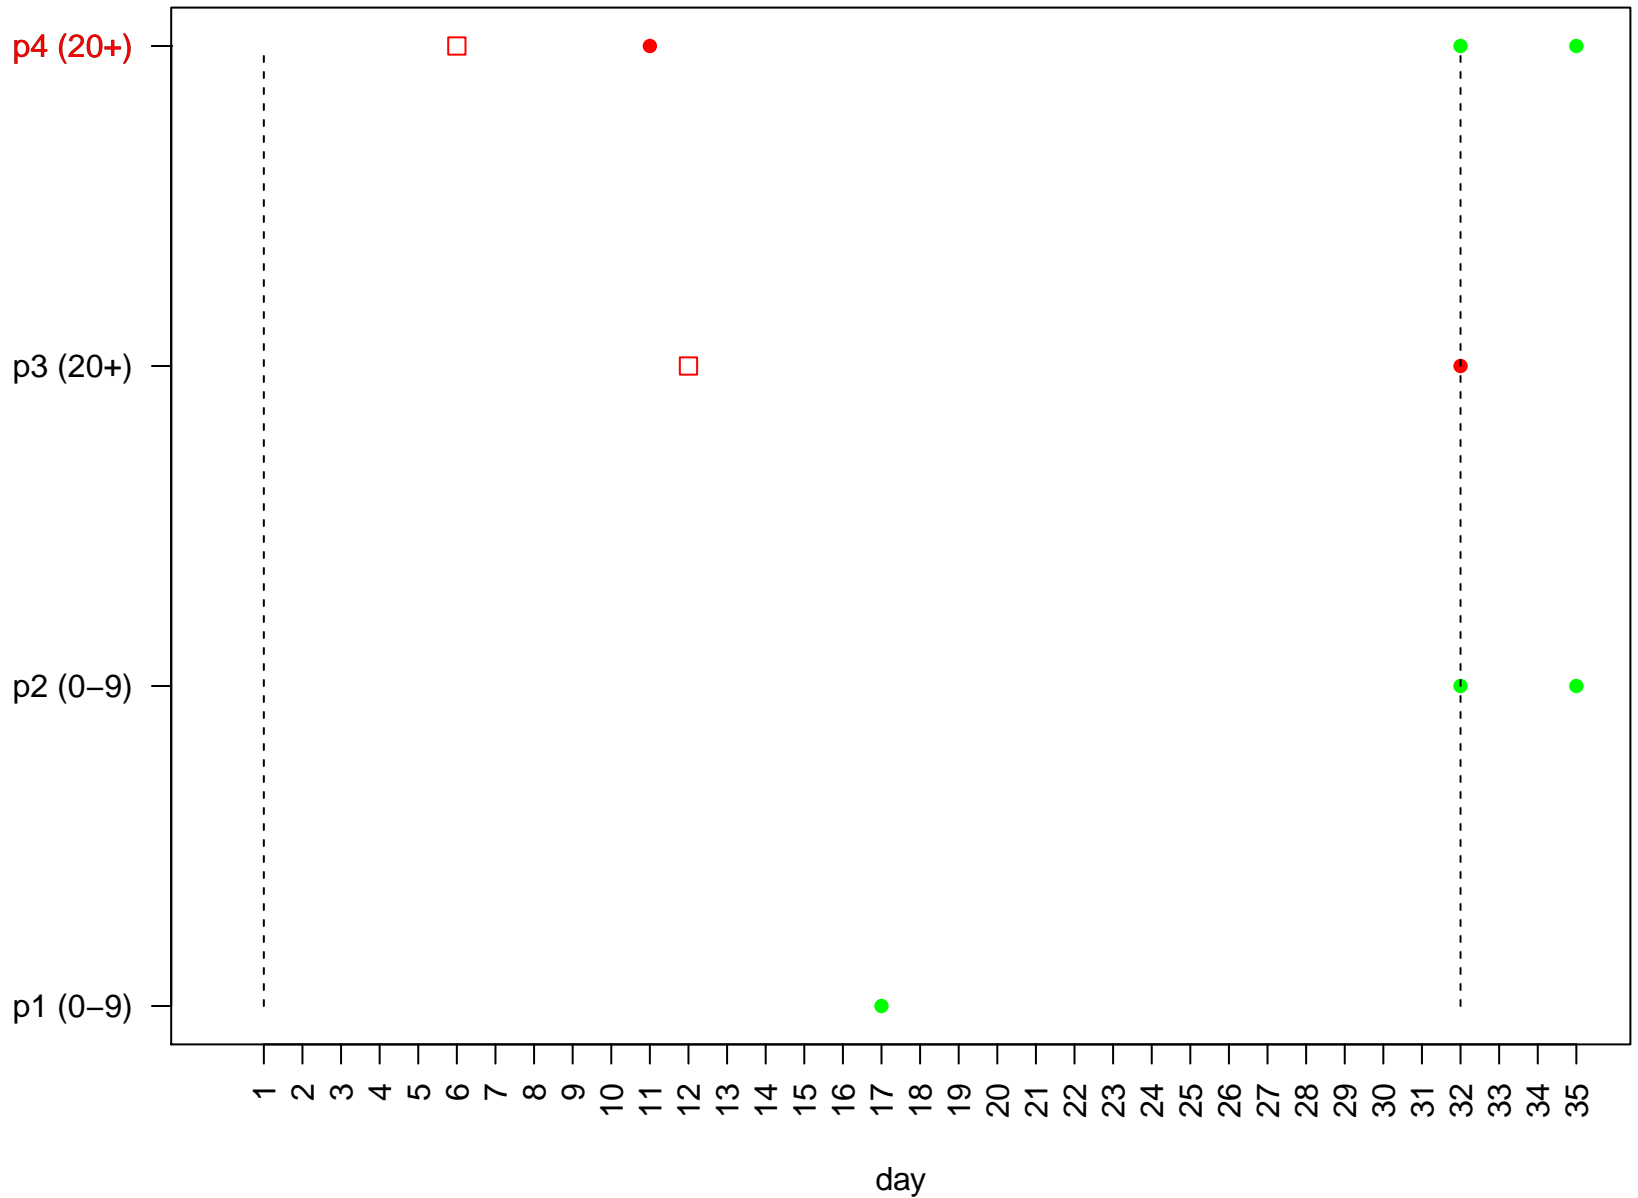

# Household 616

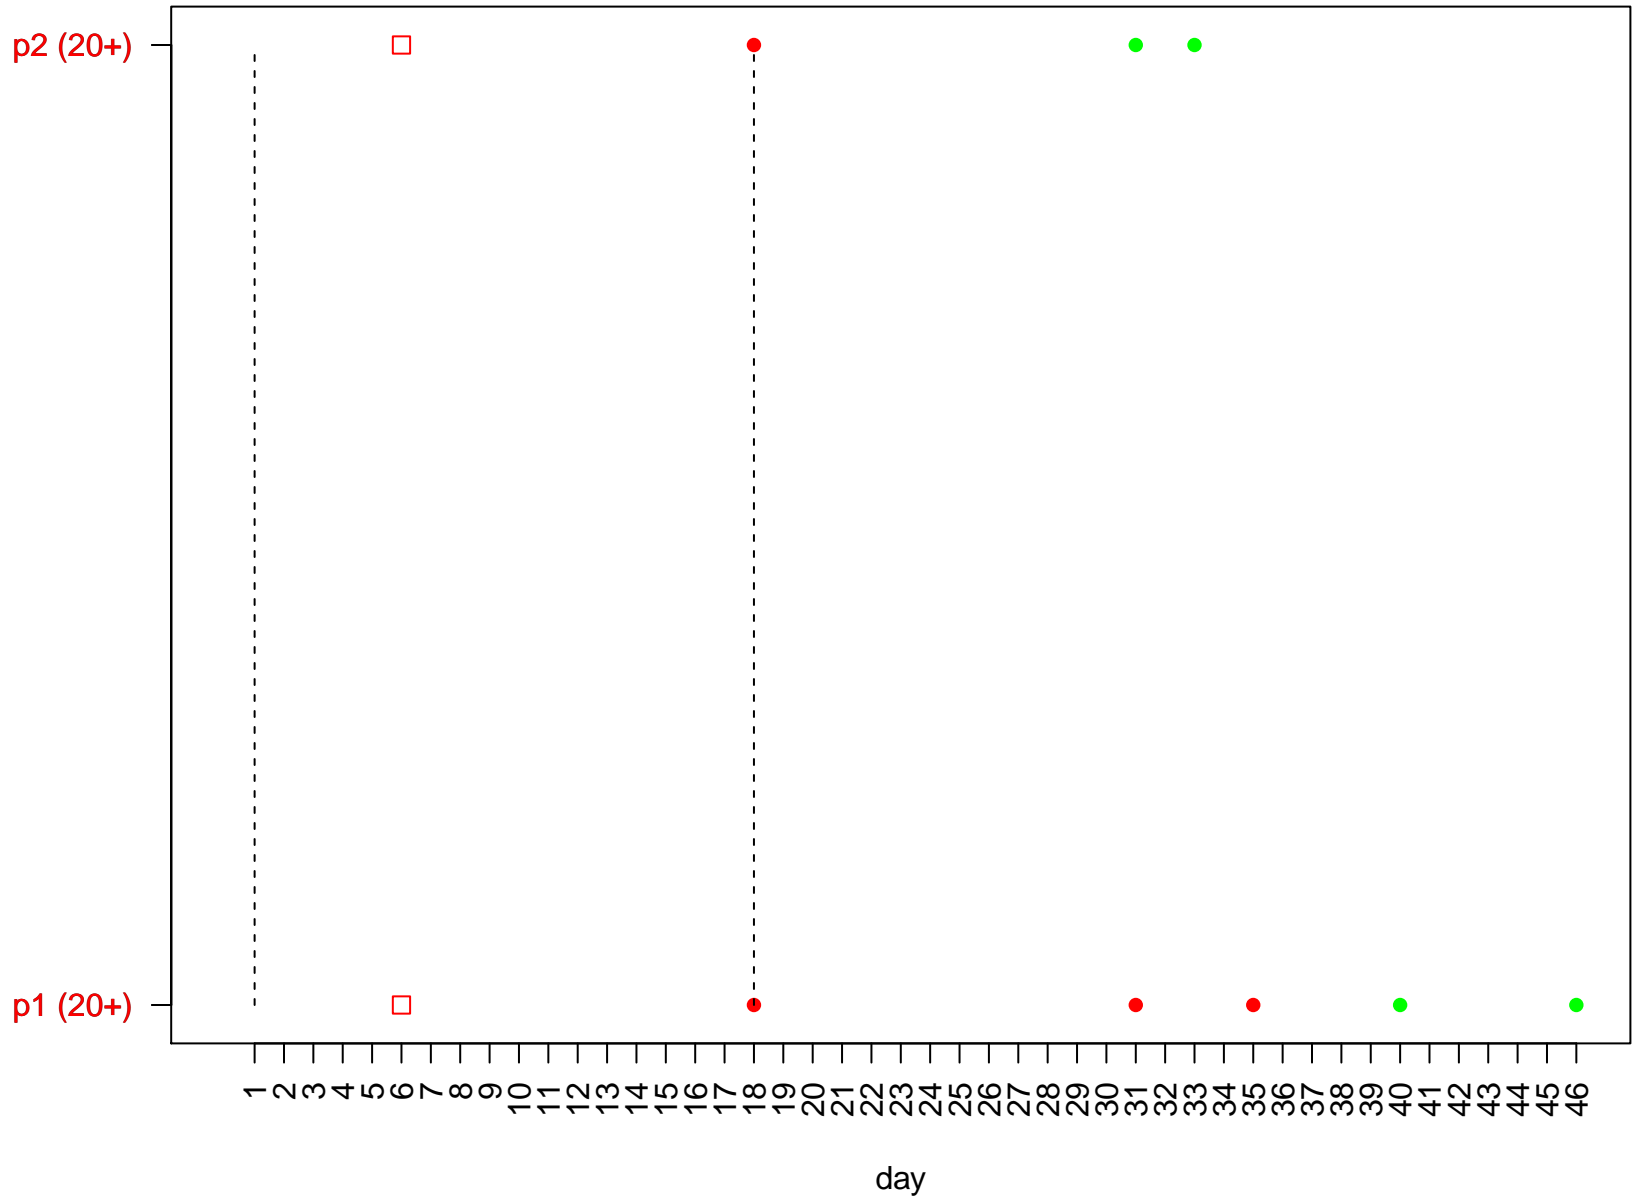

# Household 617

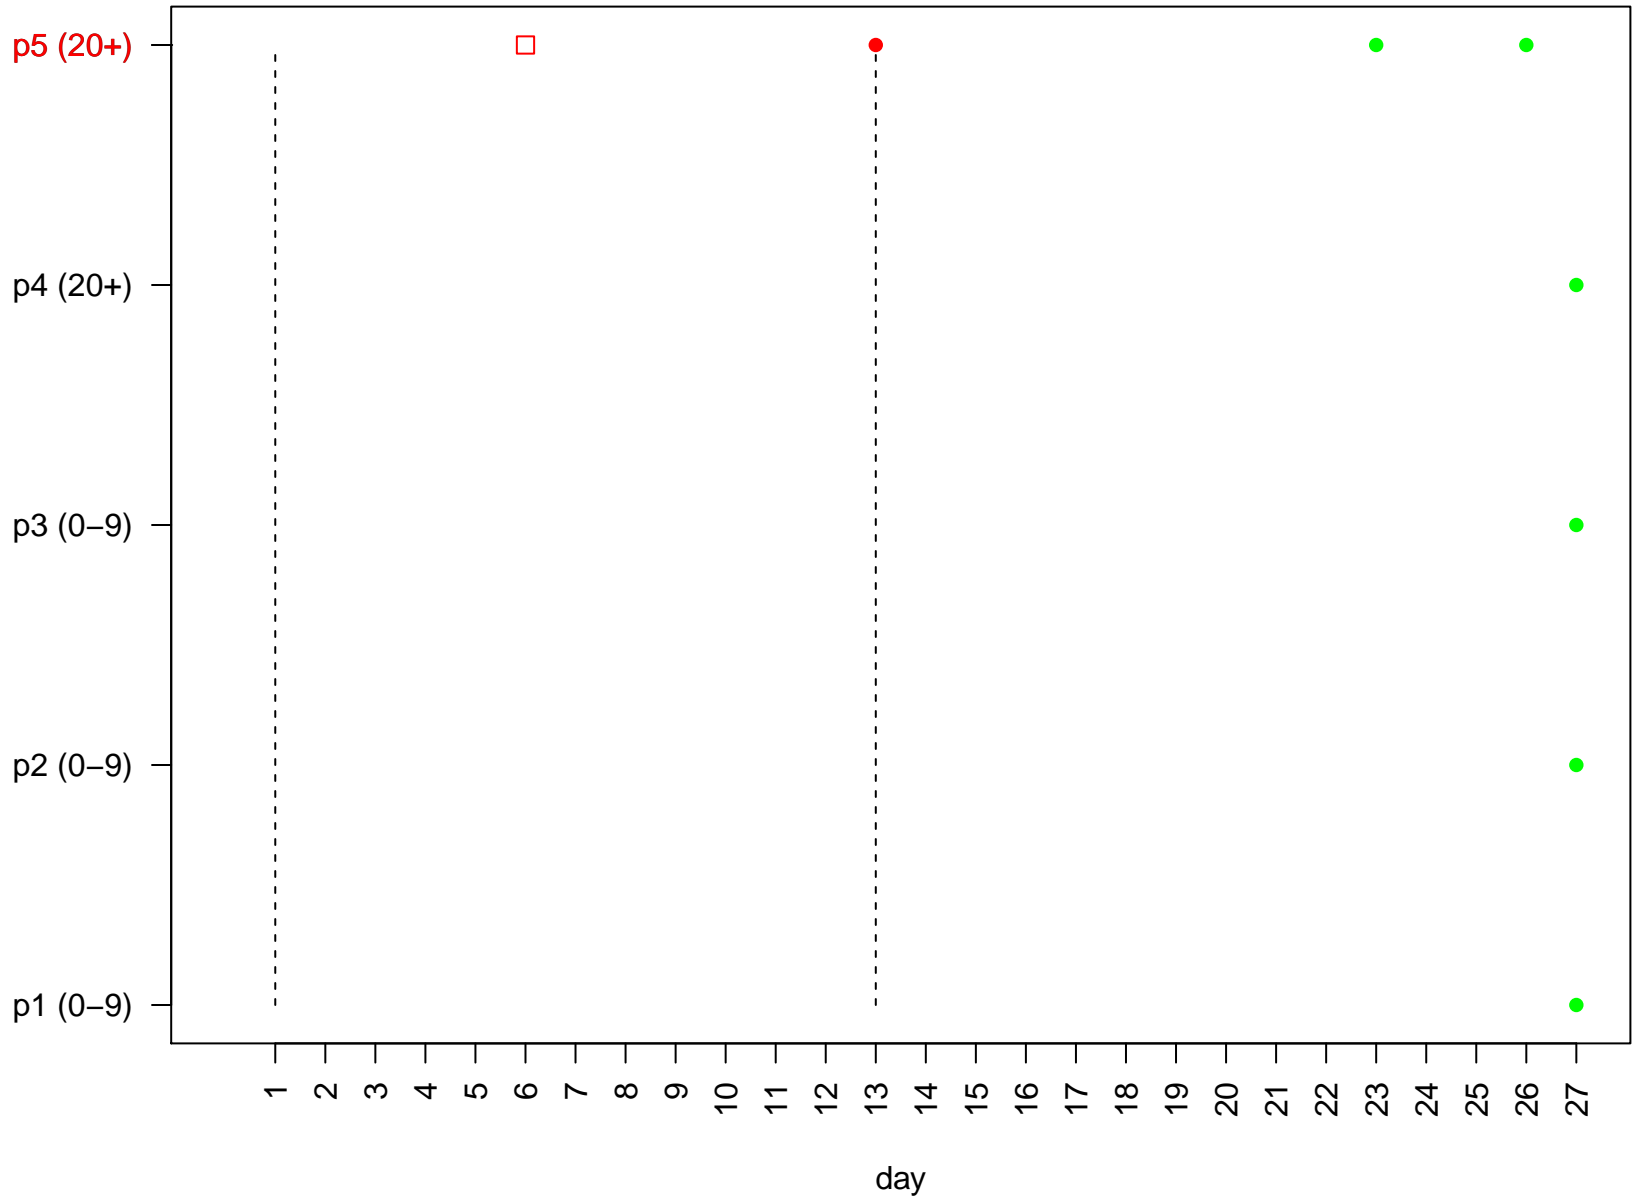

# Household 618

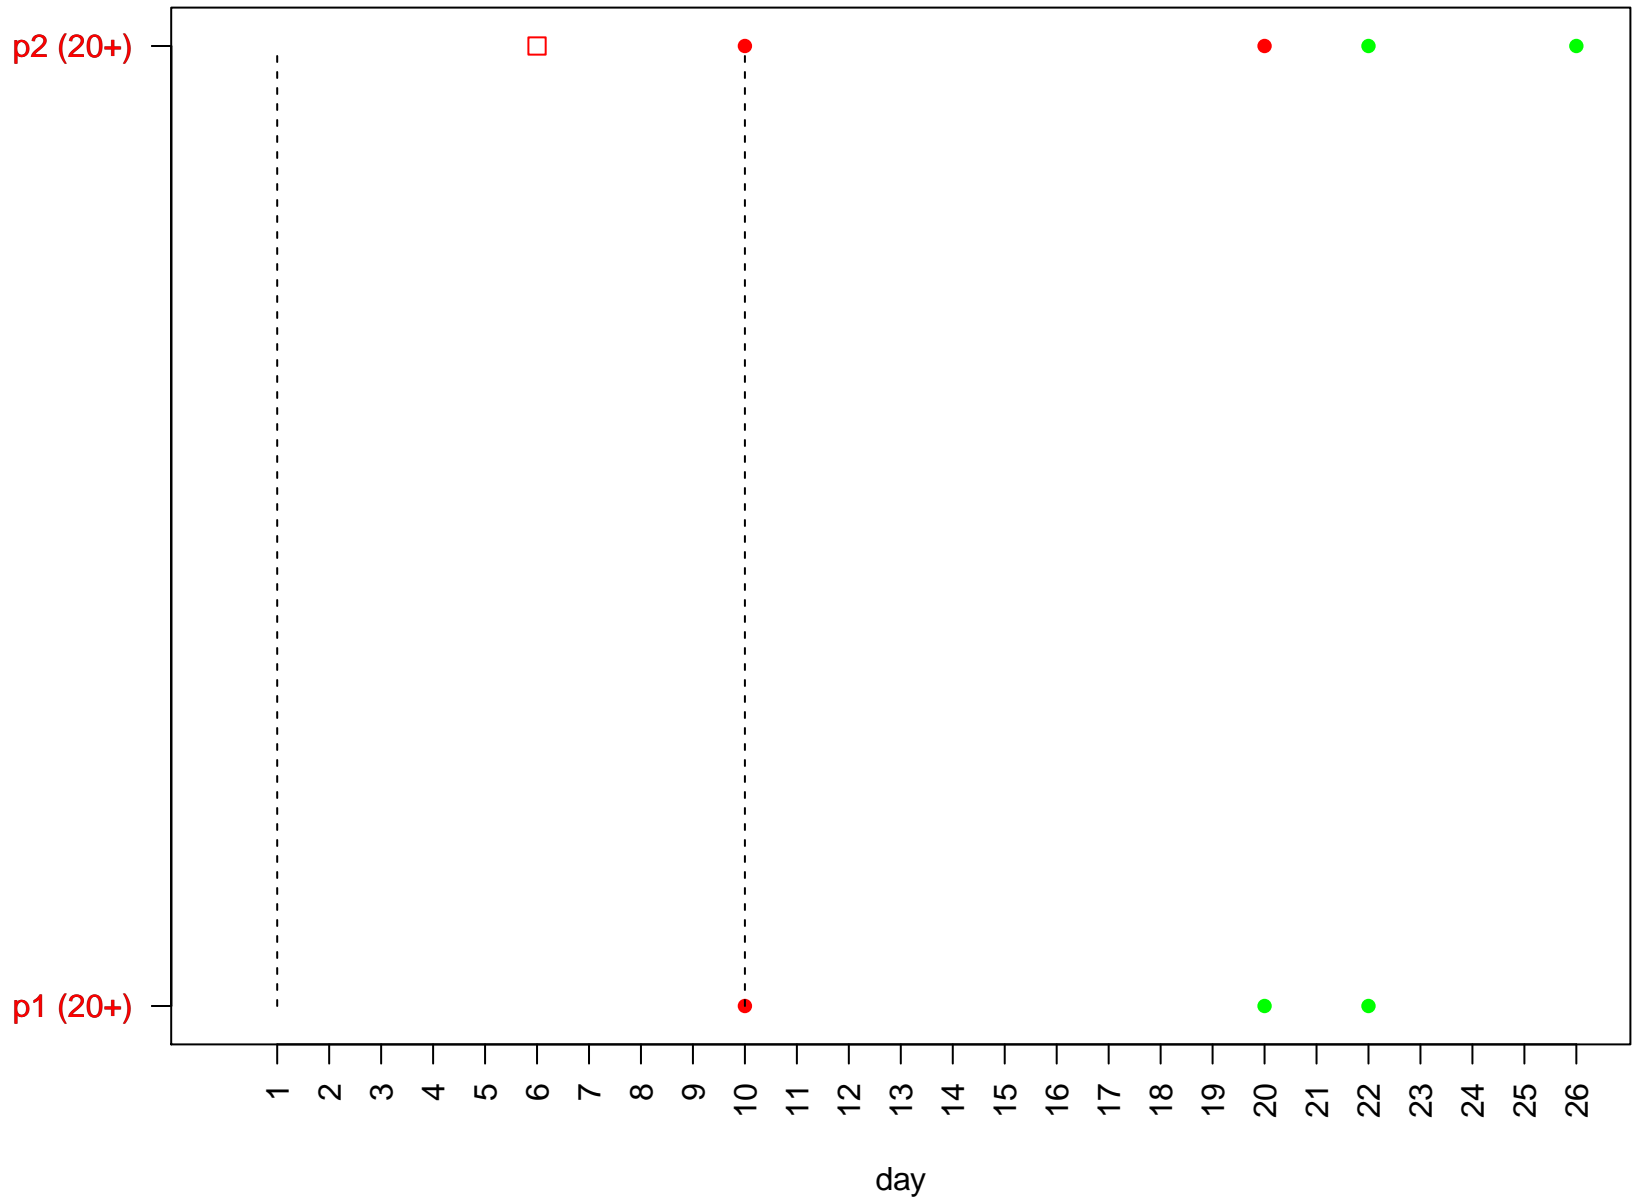

# Household 619

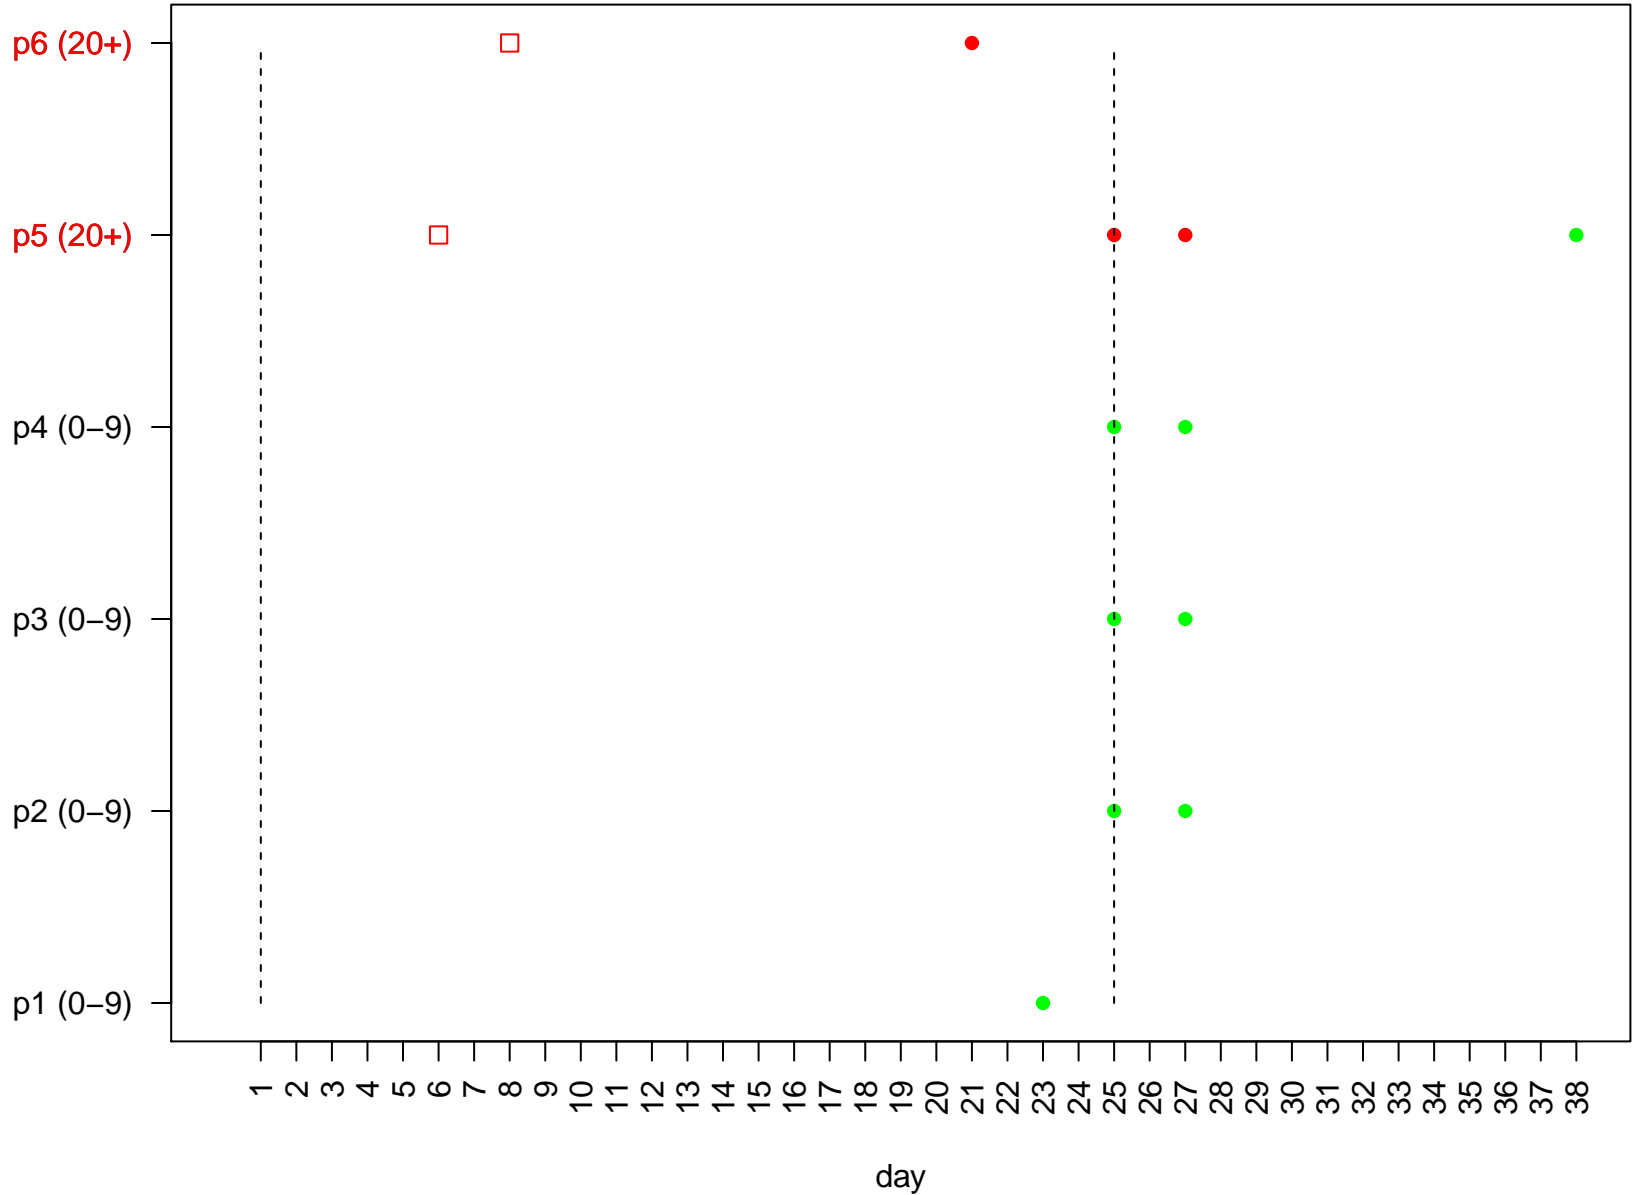

# Household 620

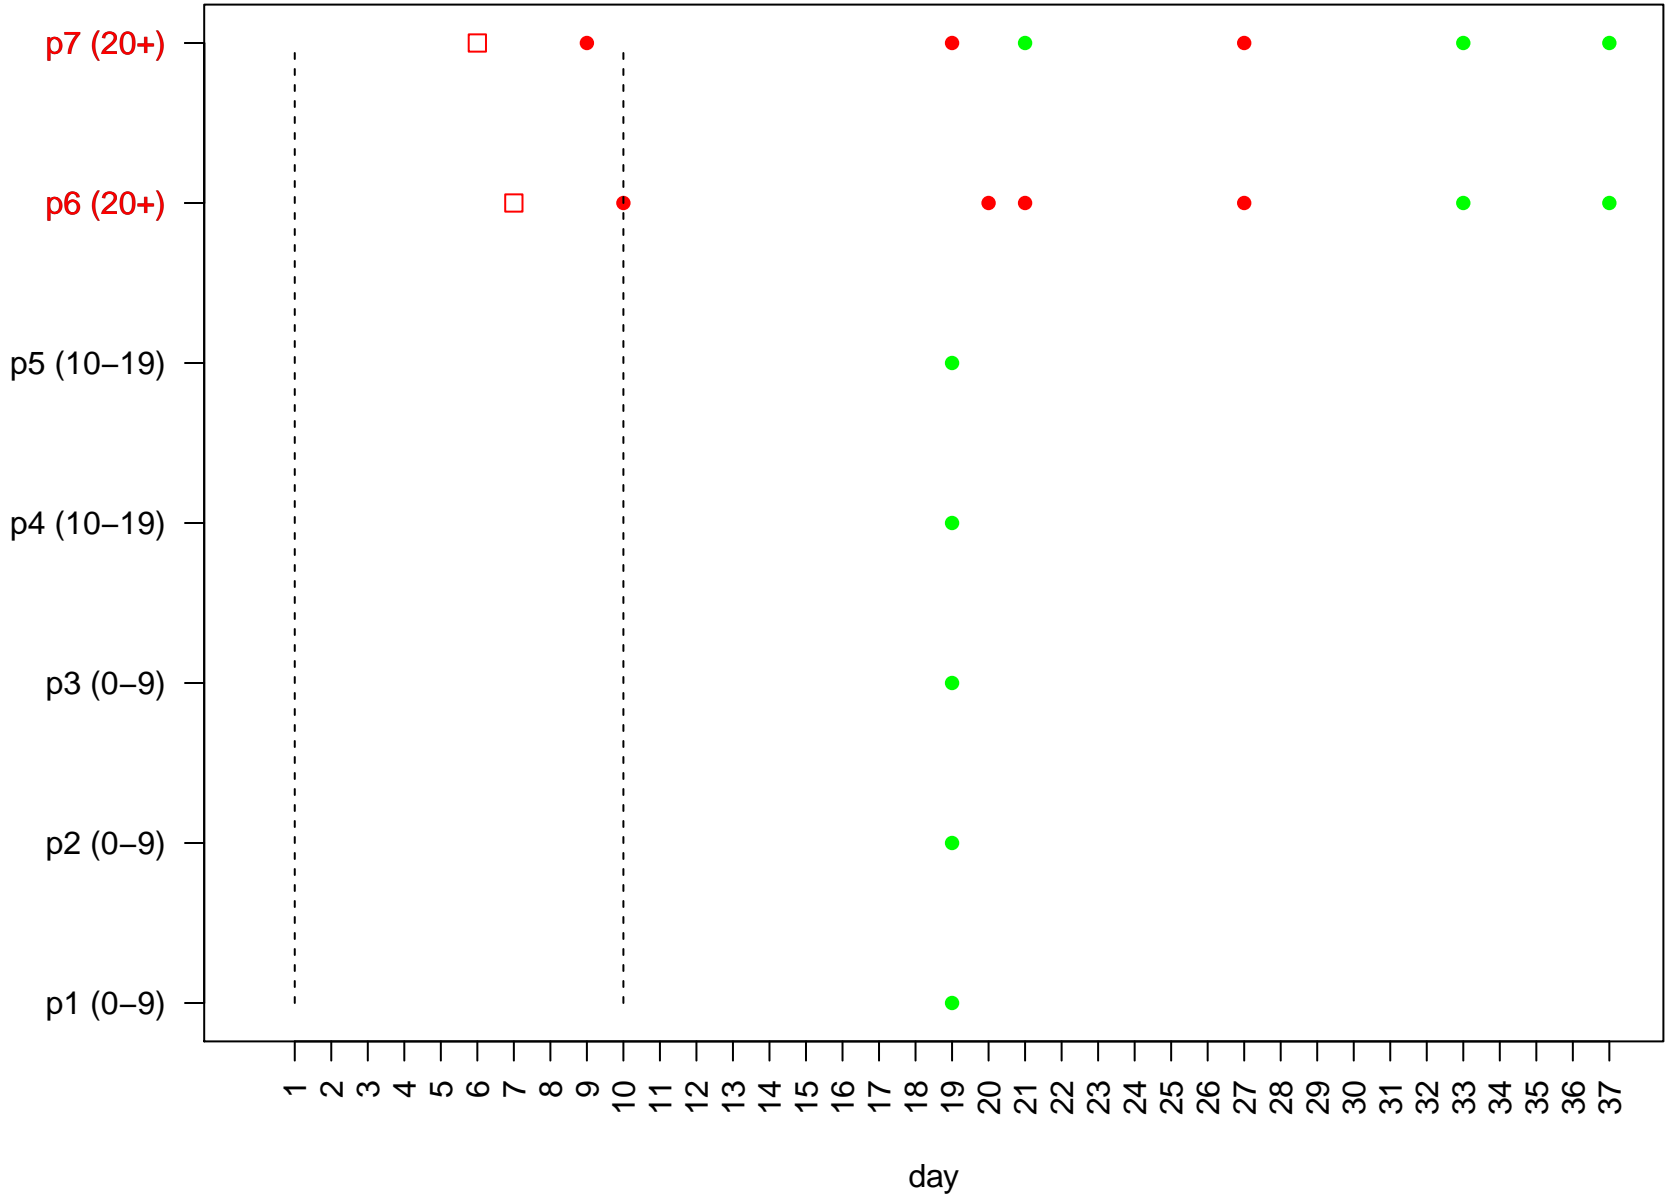





# Household 622

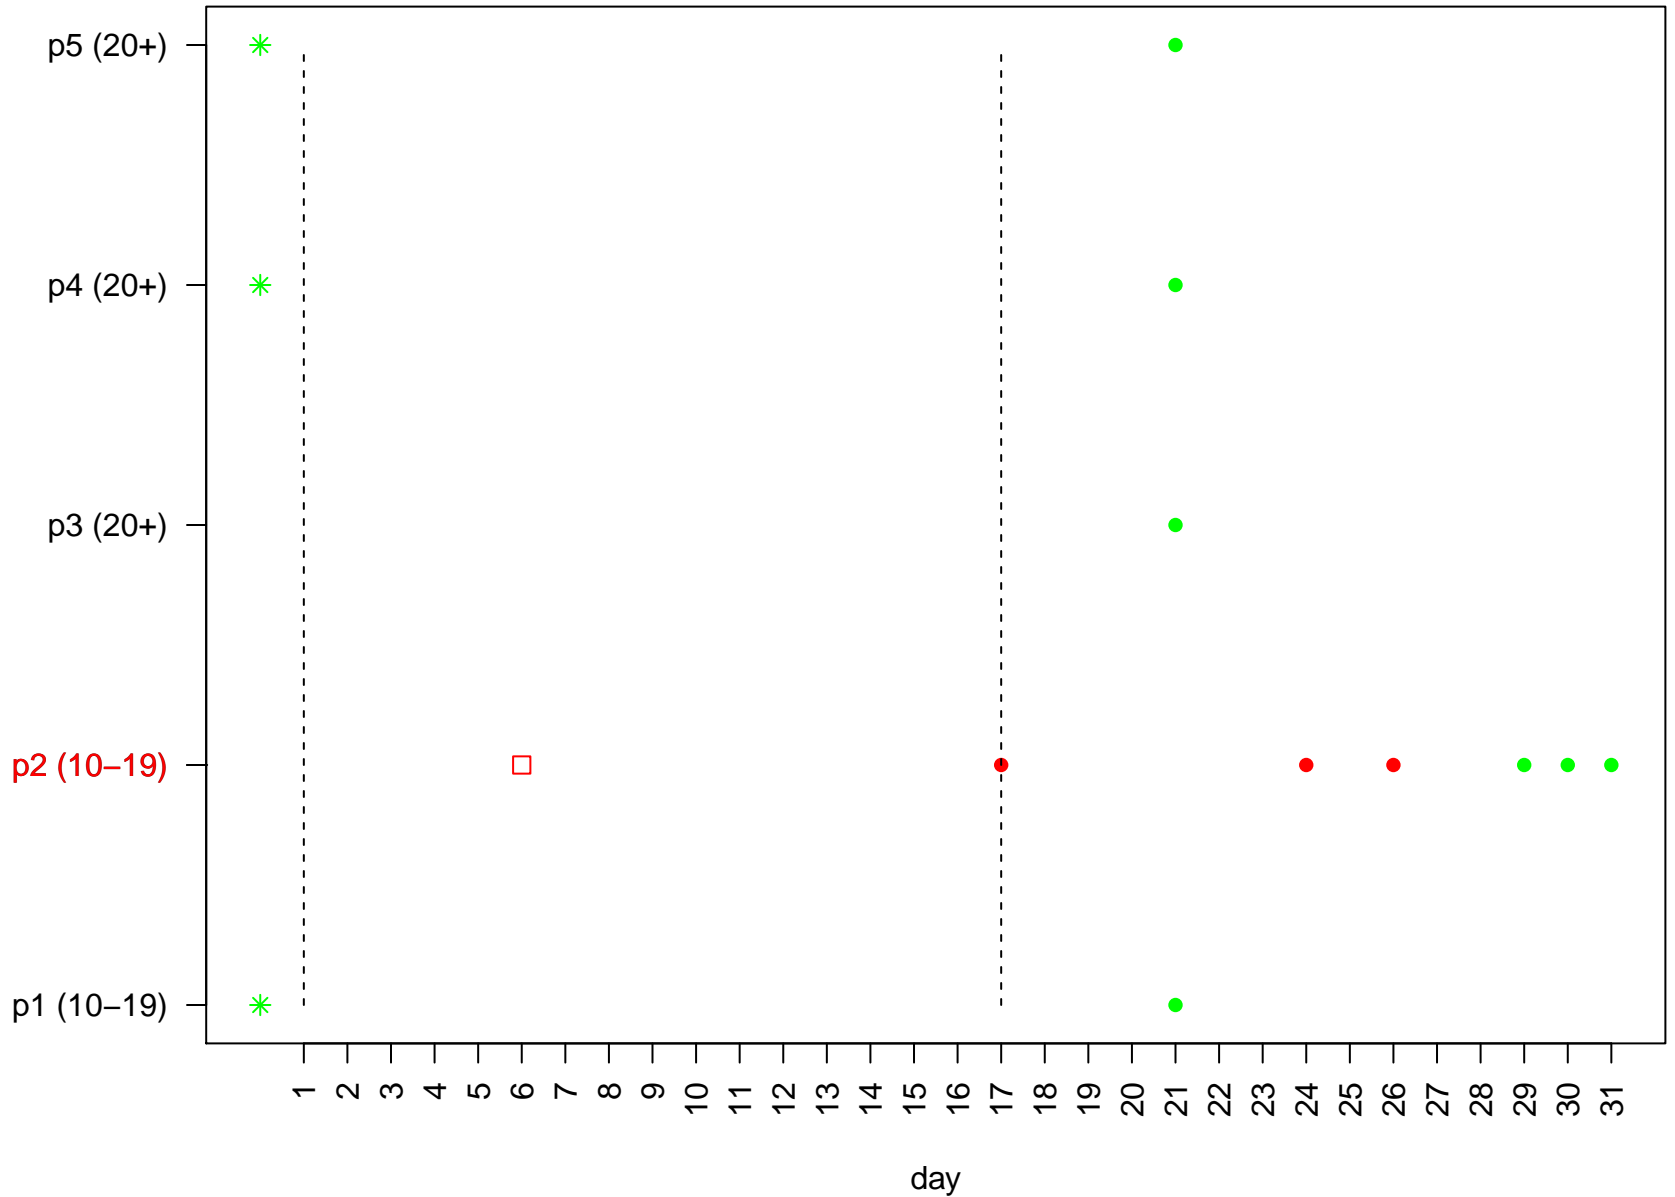

# Household 623

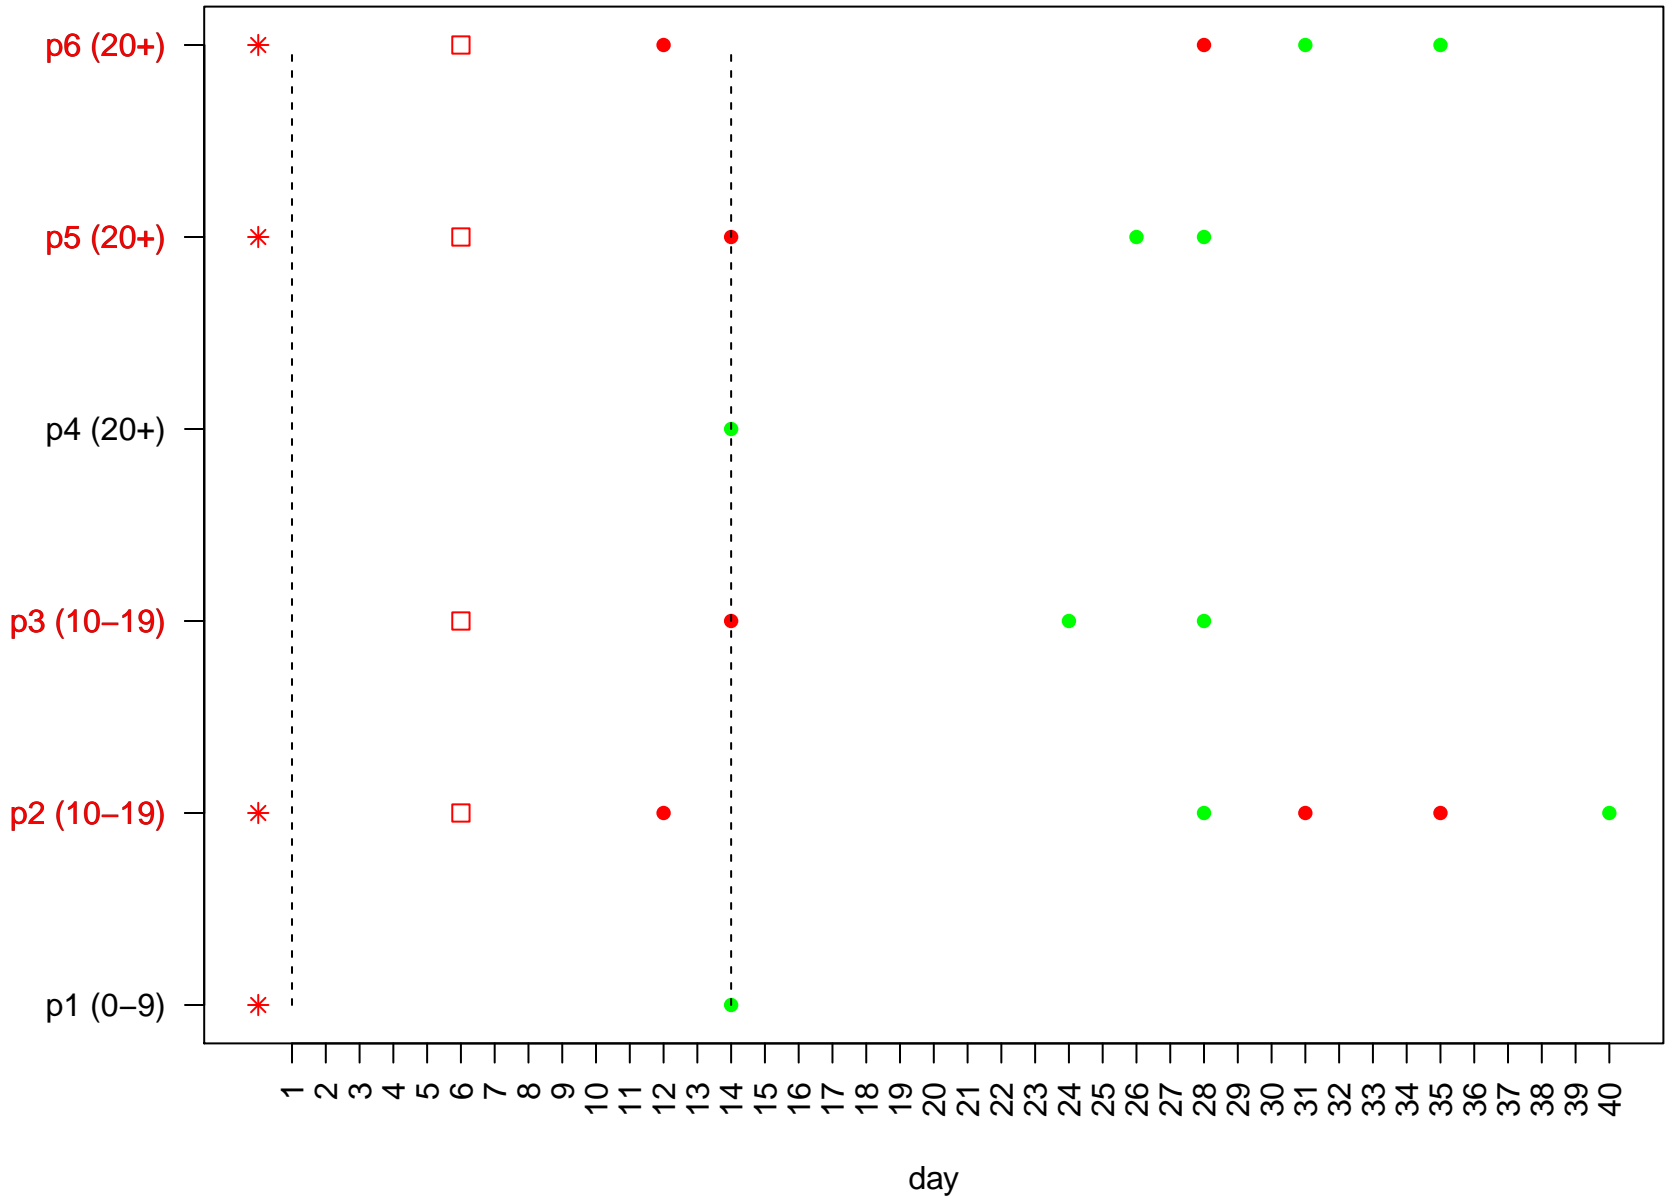

# Household 624

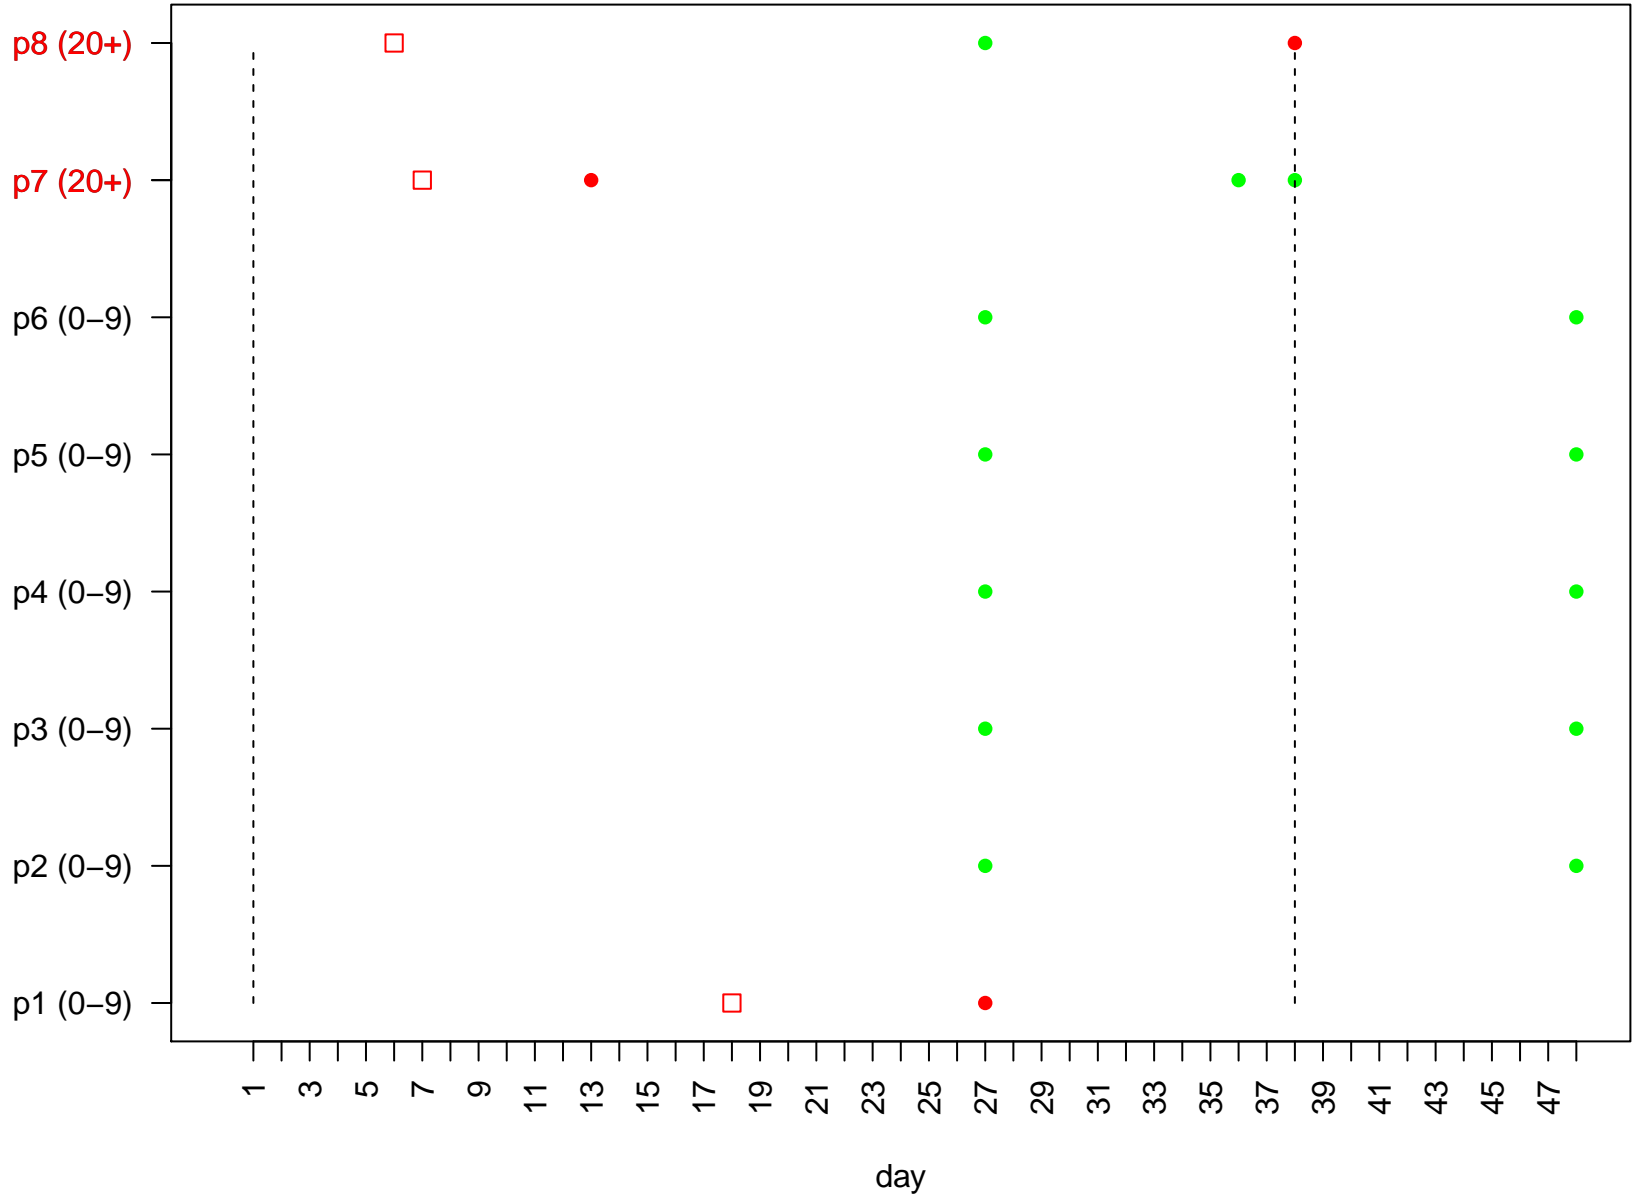

# Household 625

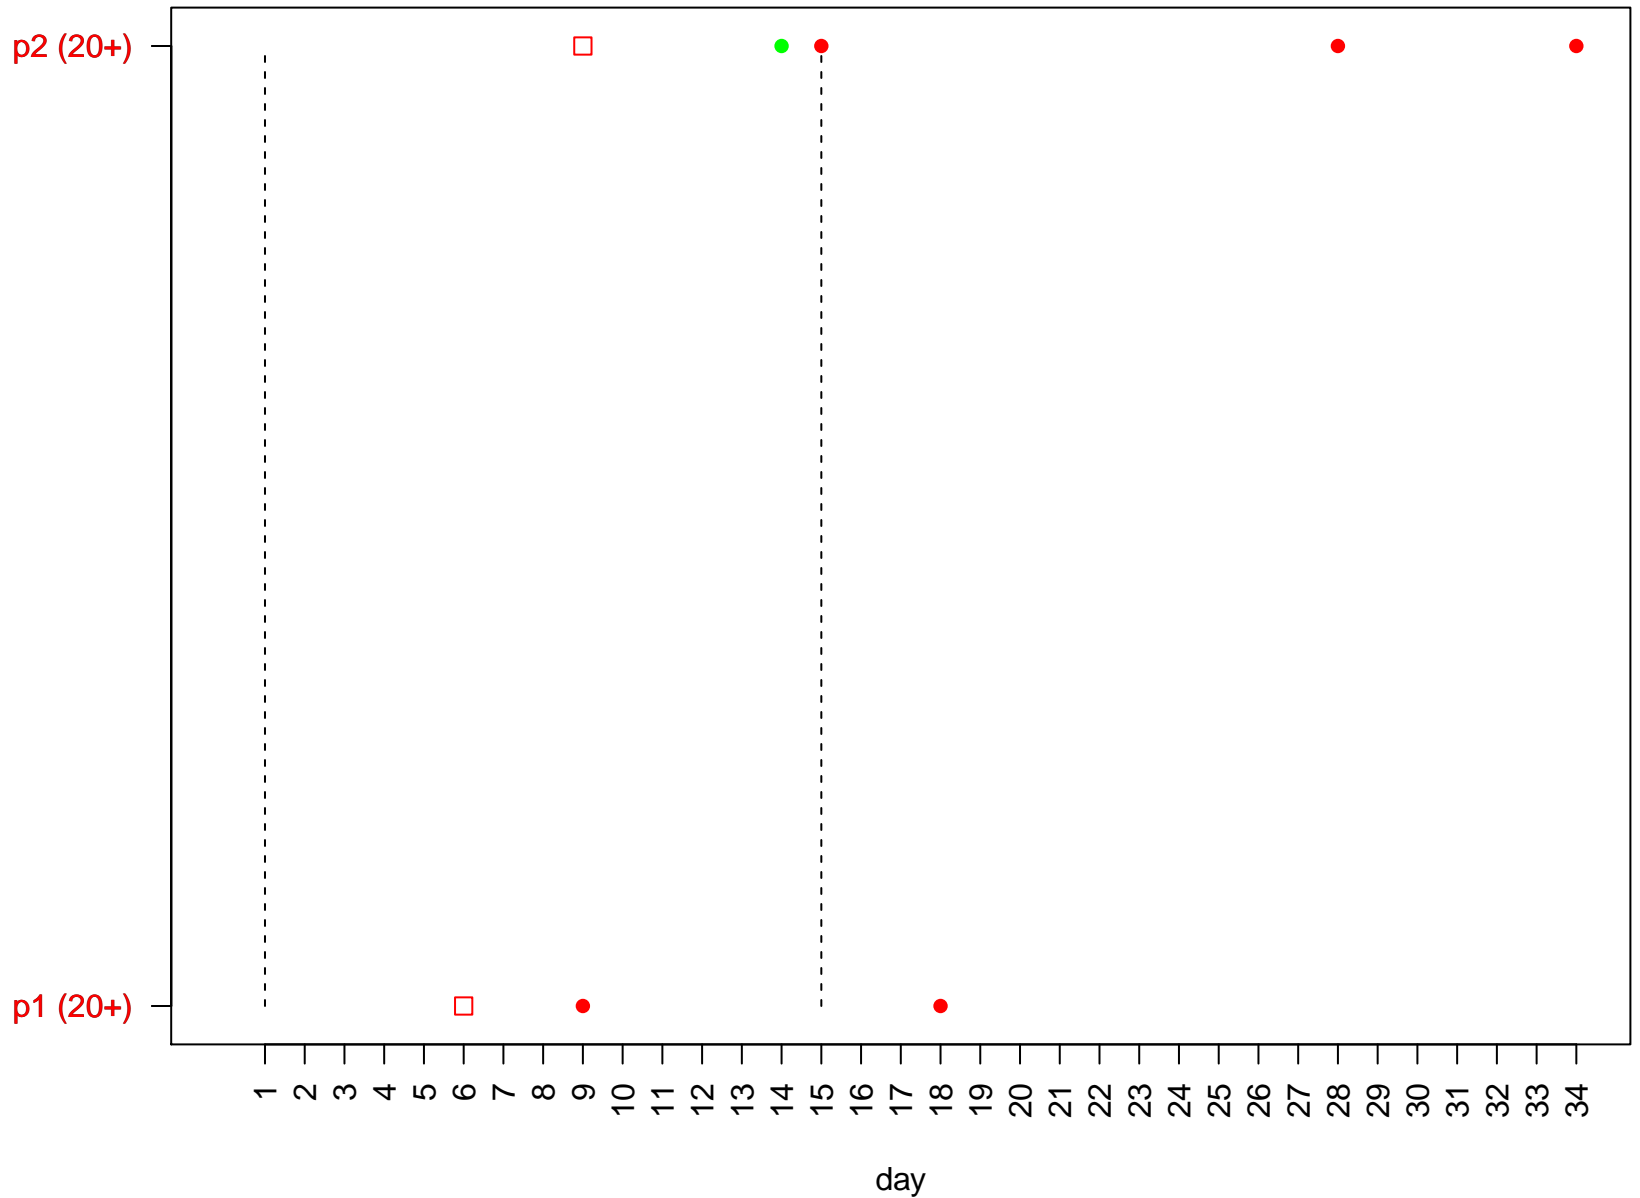

# Household 626

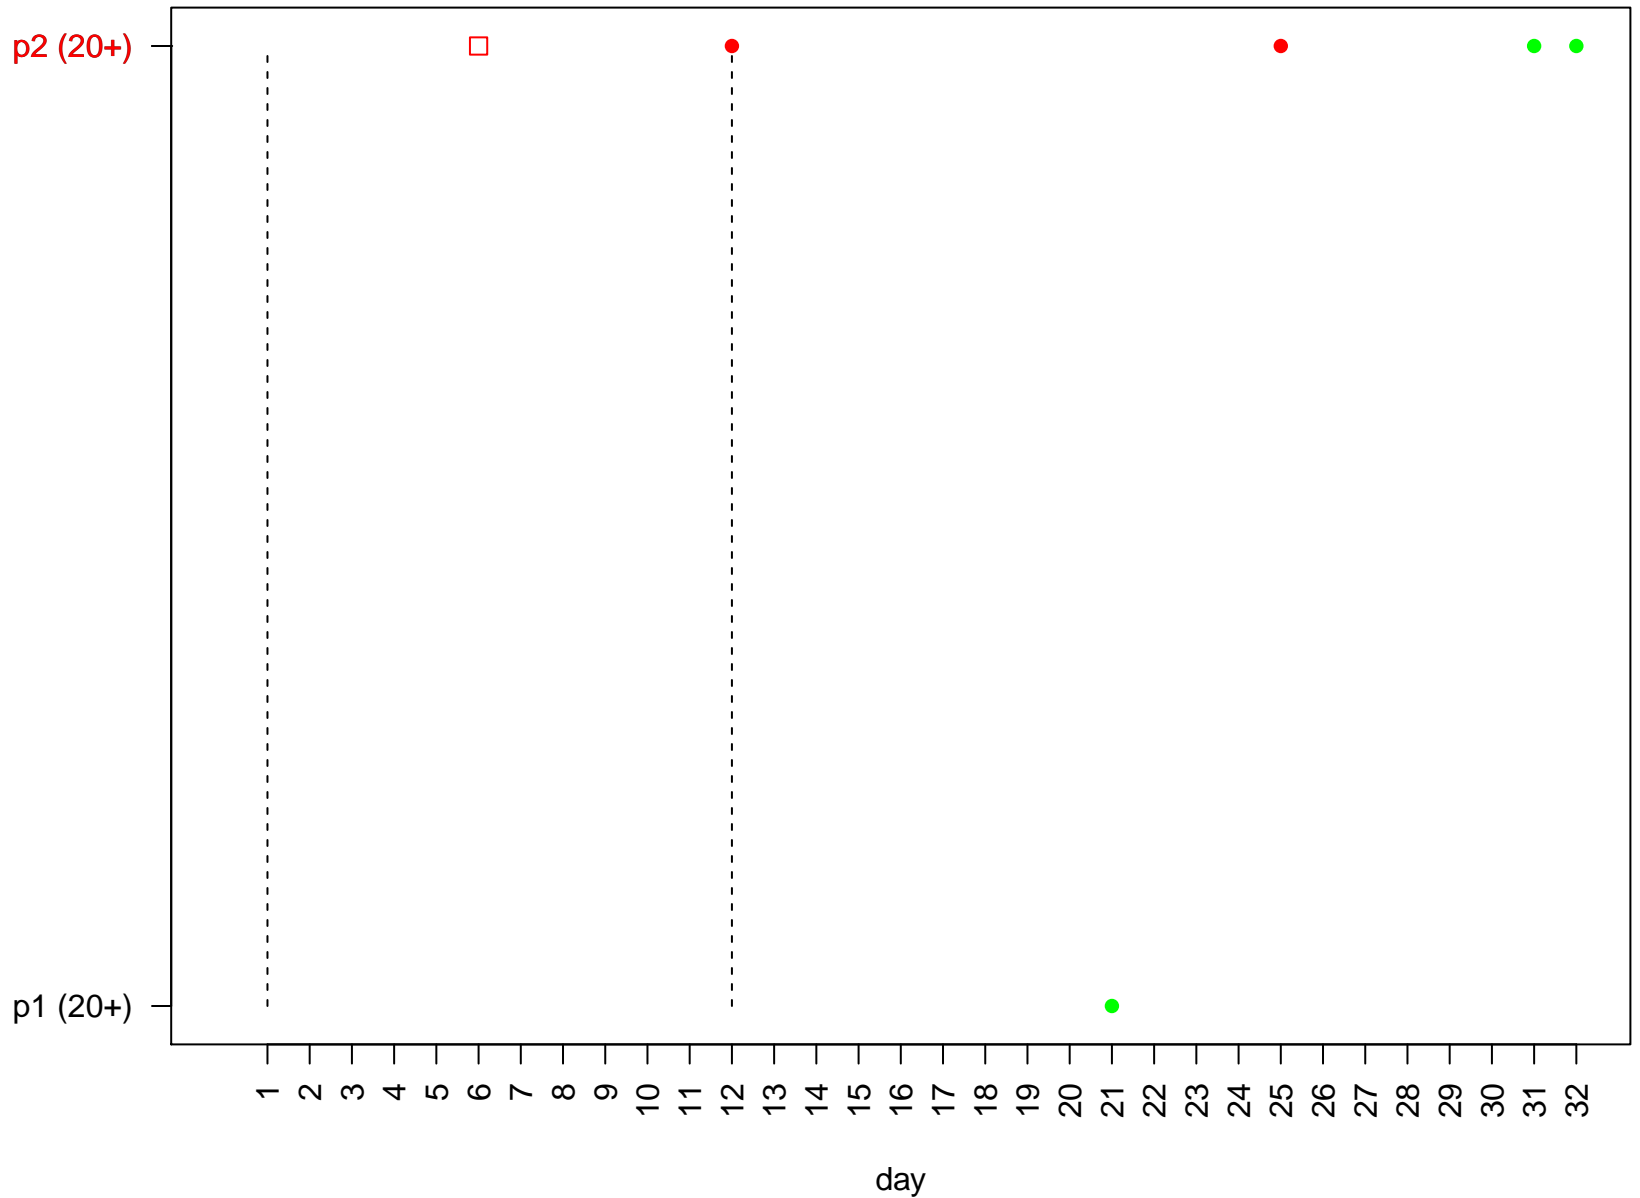

# Household 627

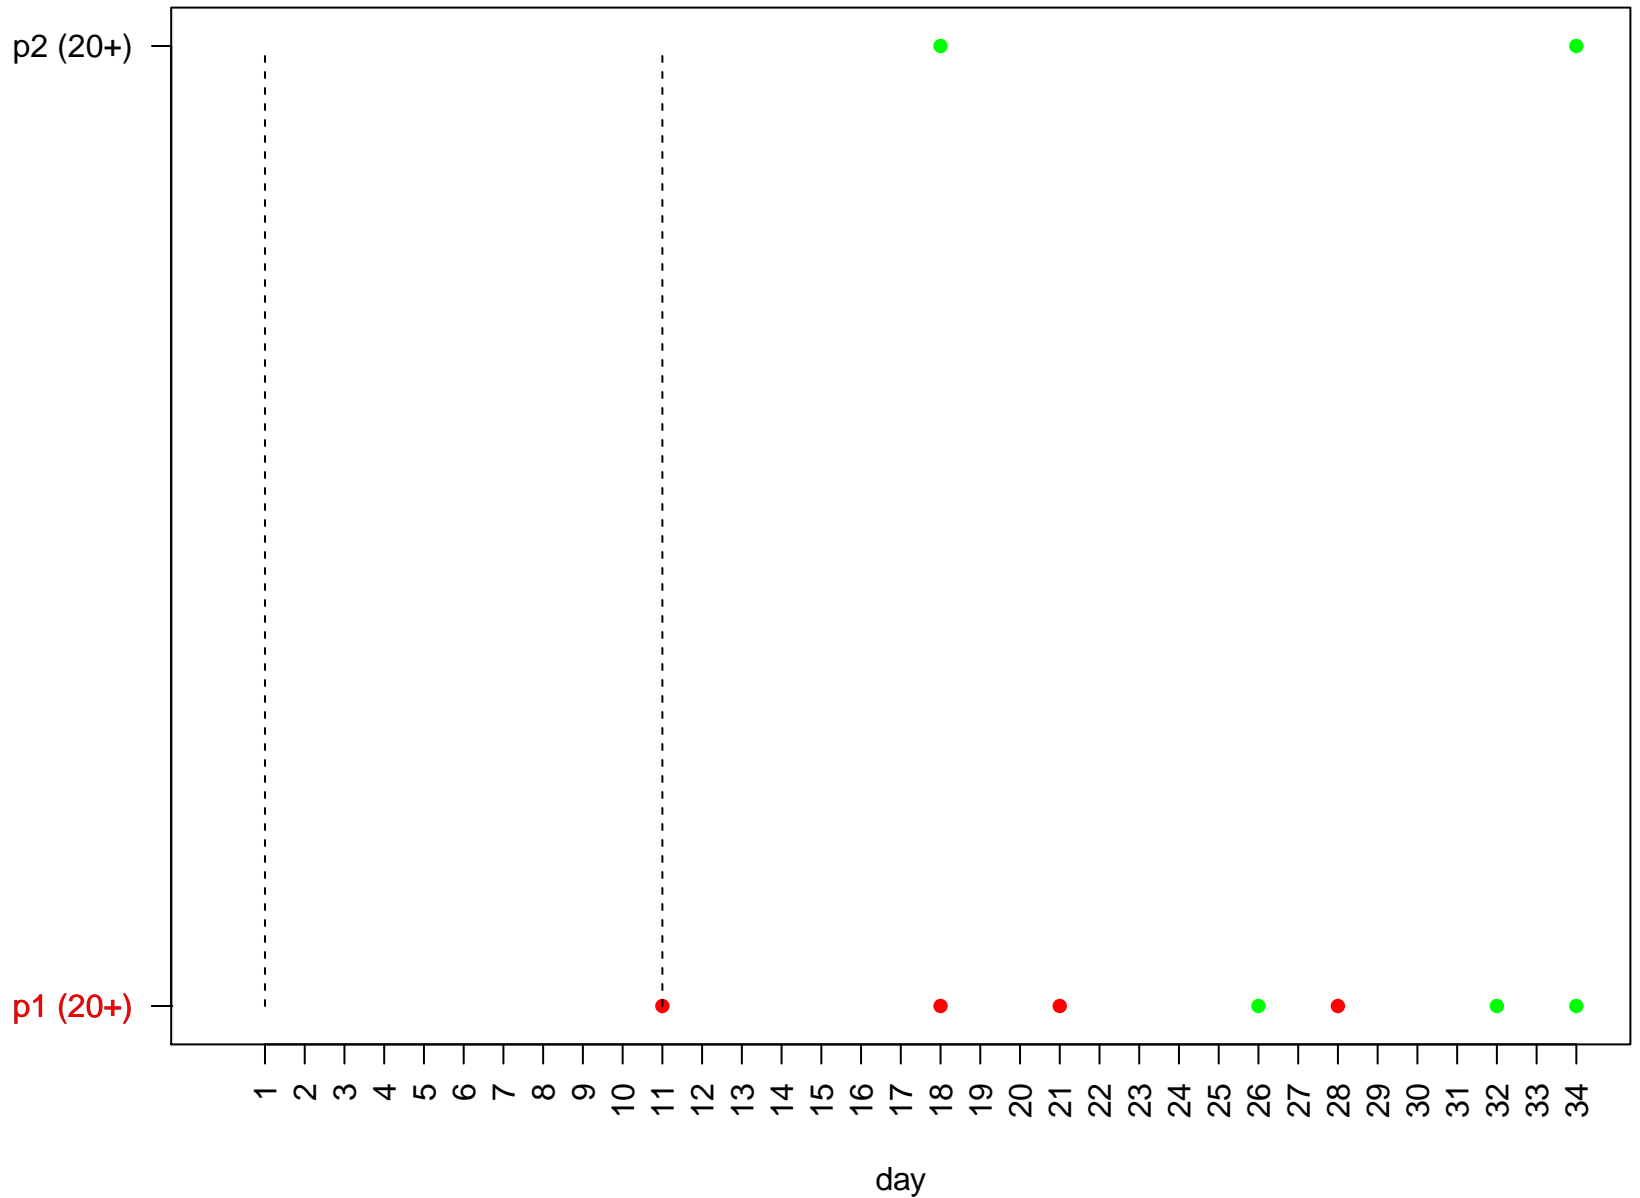

# Household 628

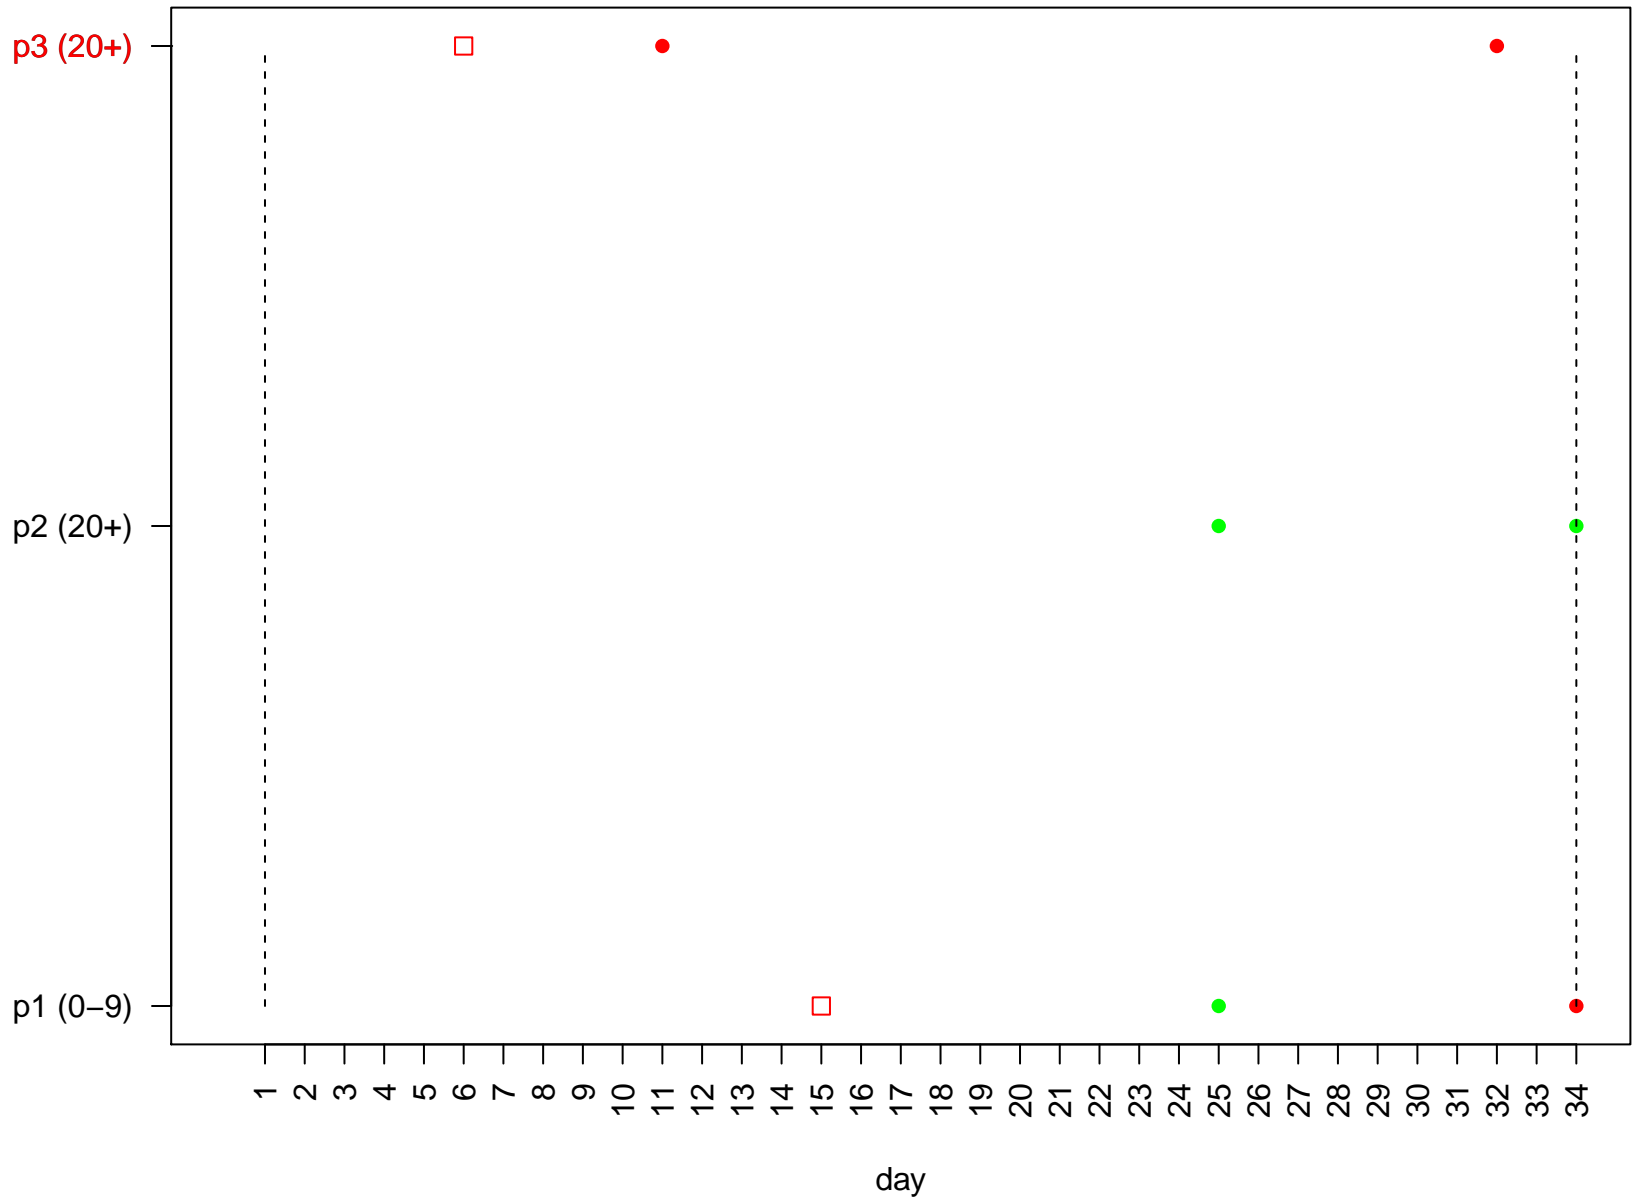



# Household 629

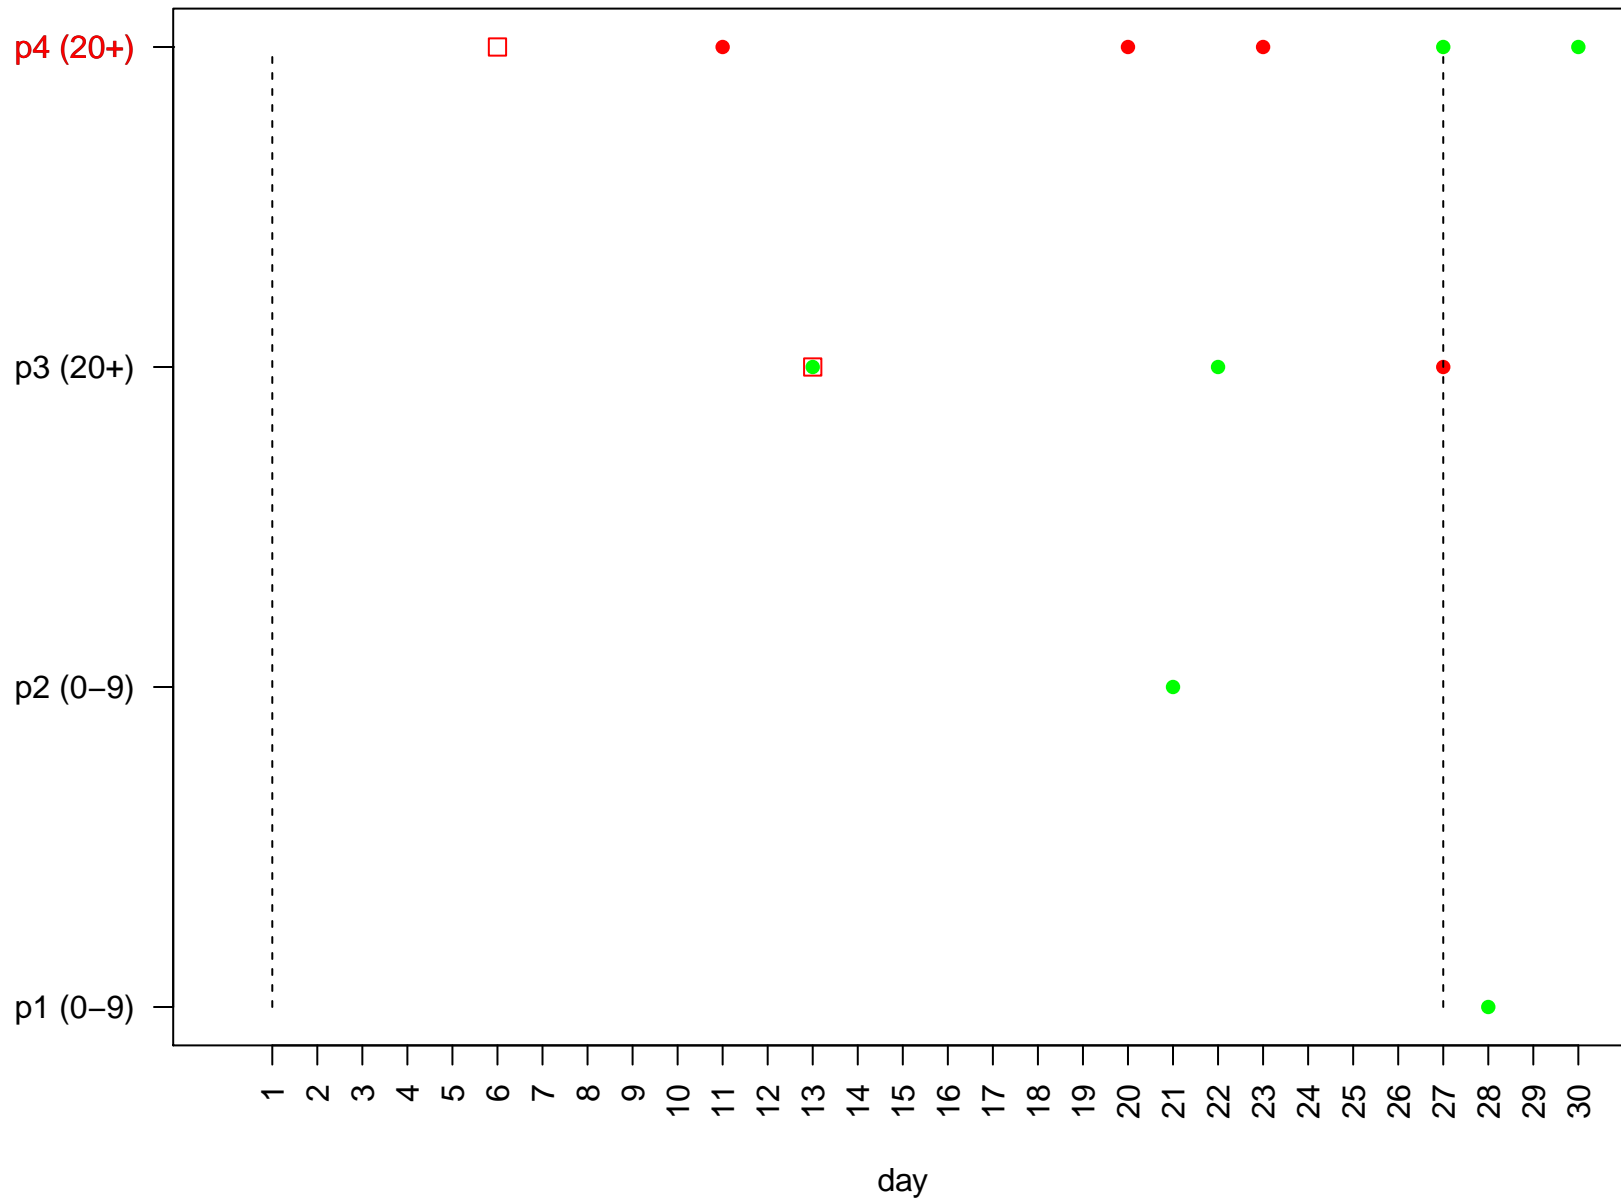

# Household 630

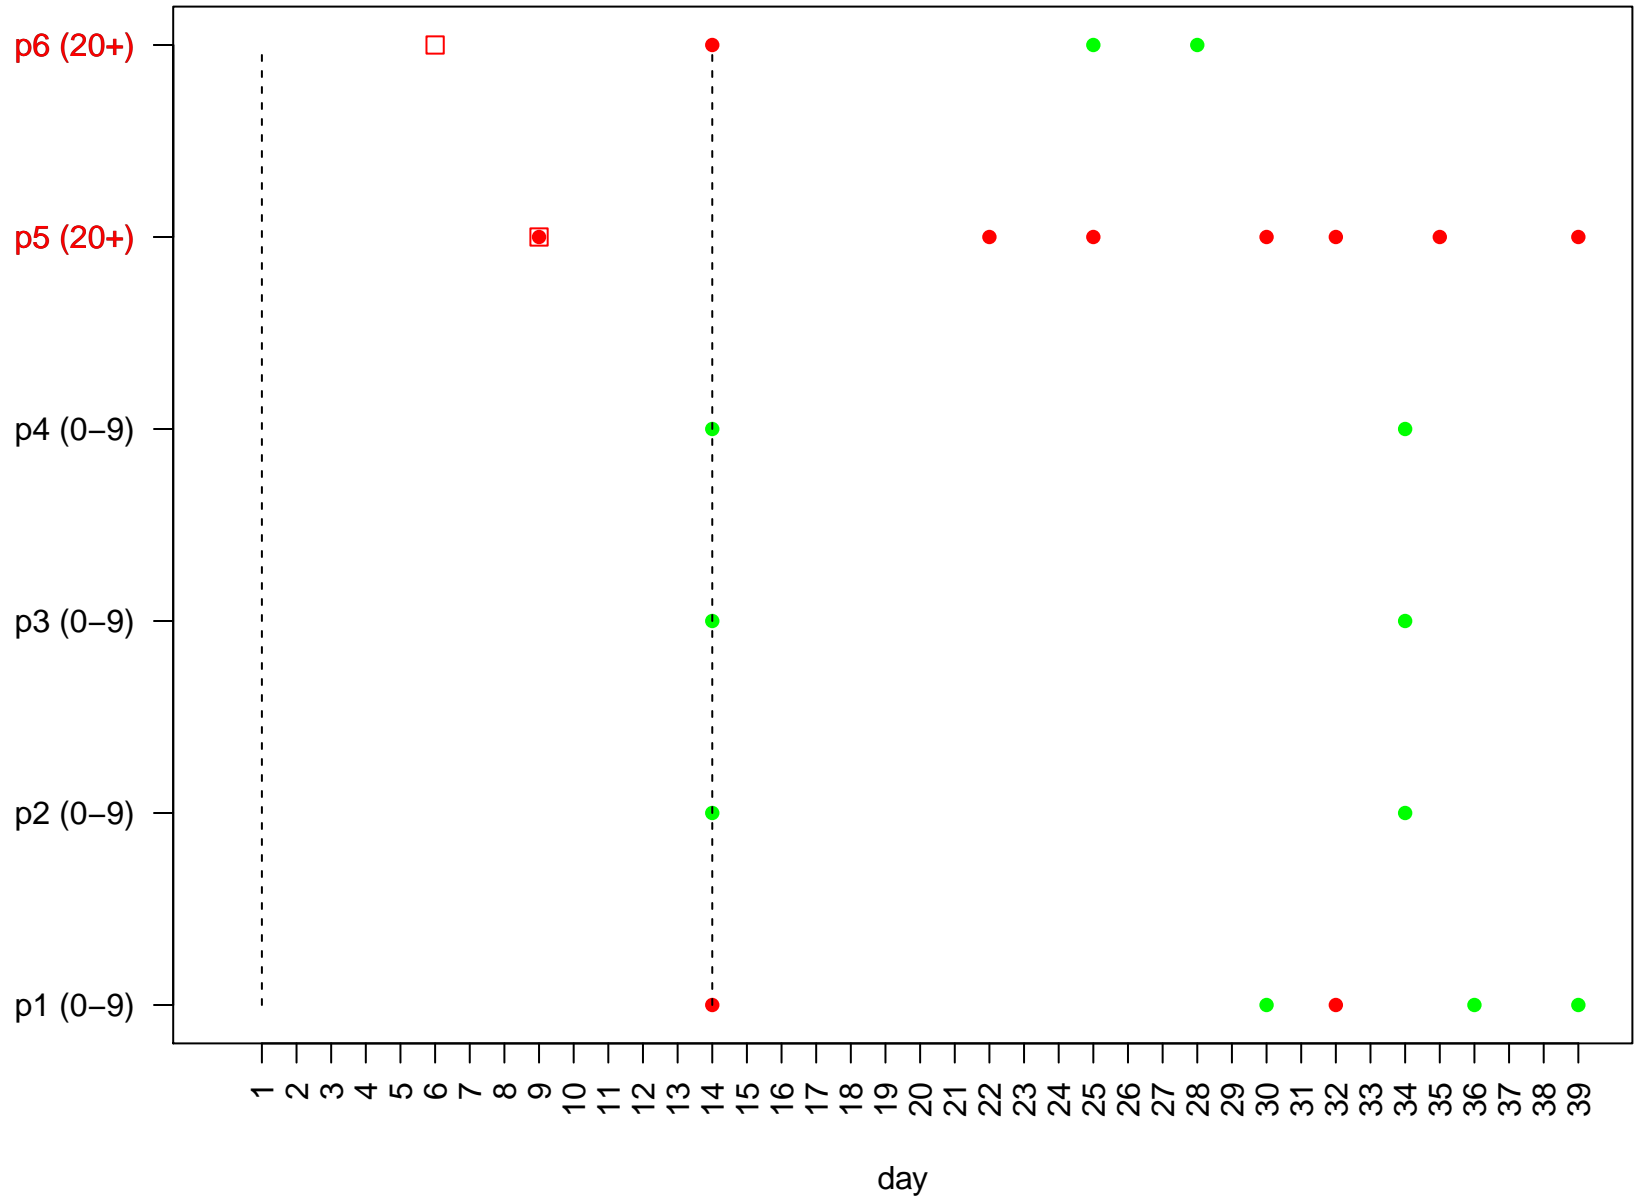

# Household 631

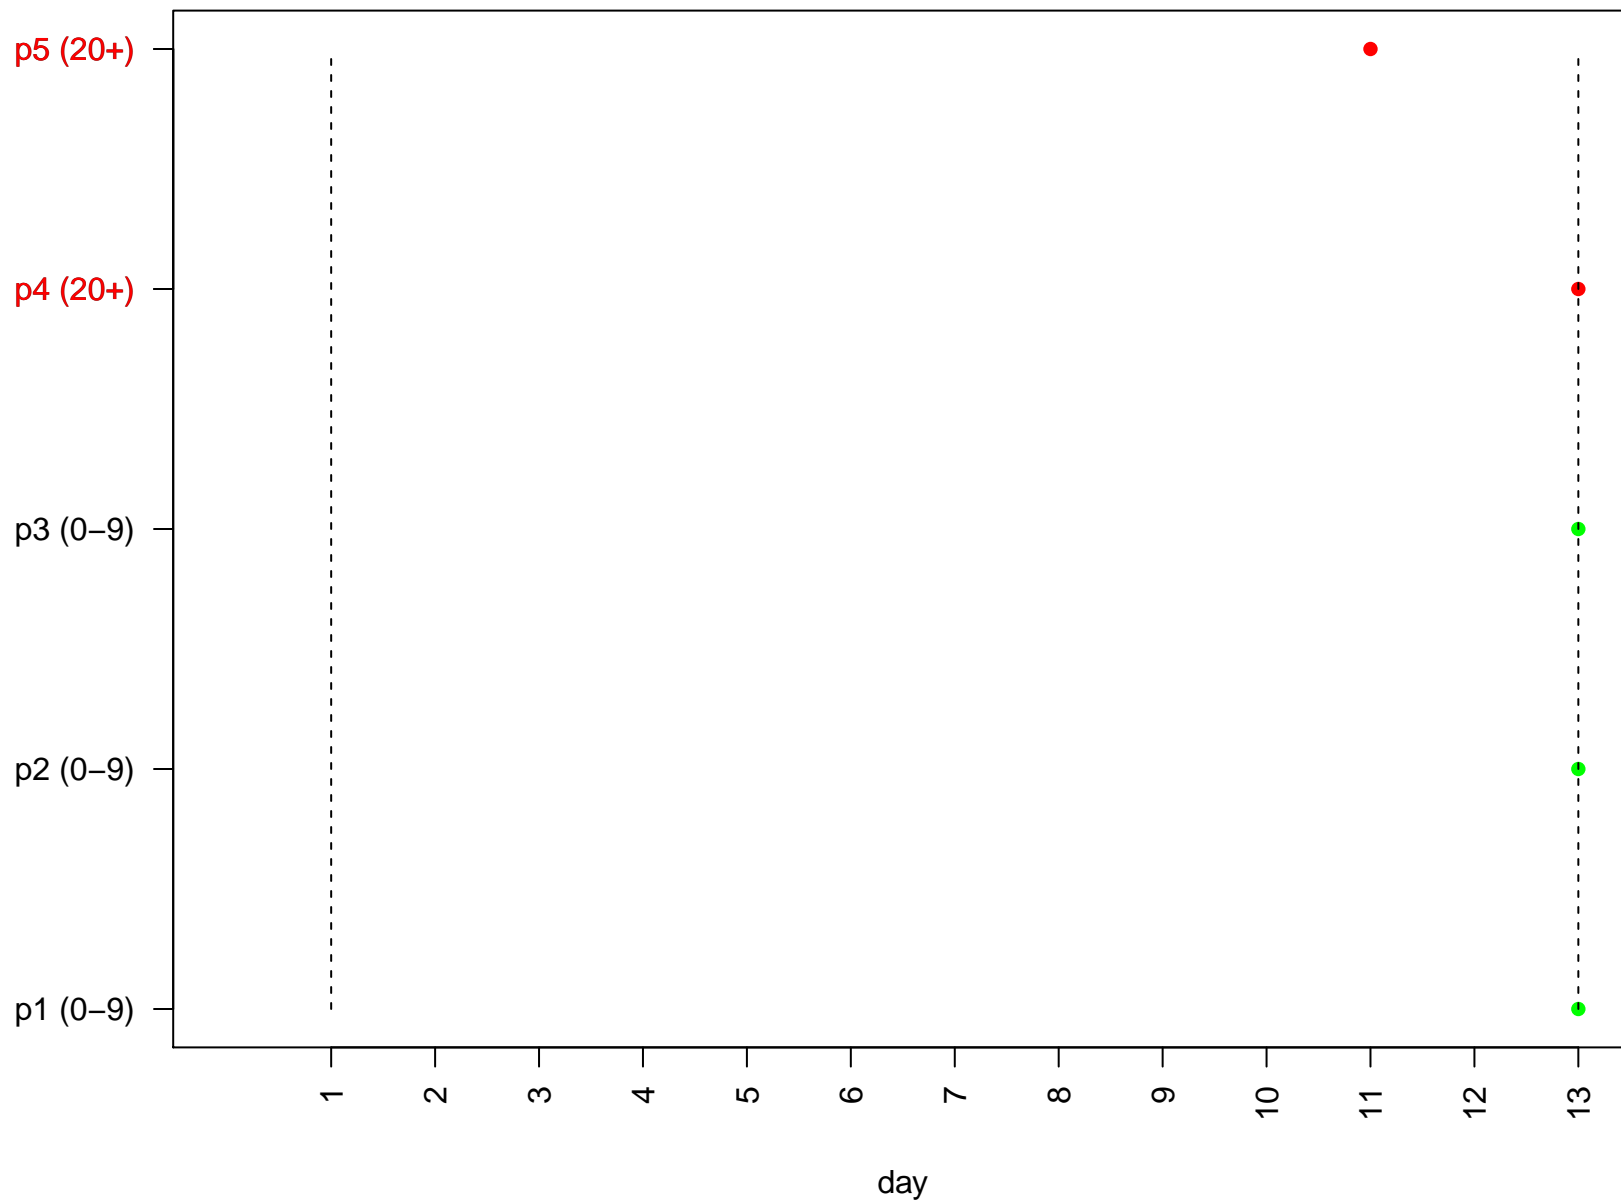

# Household 634

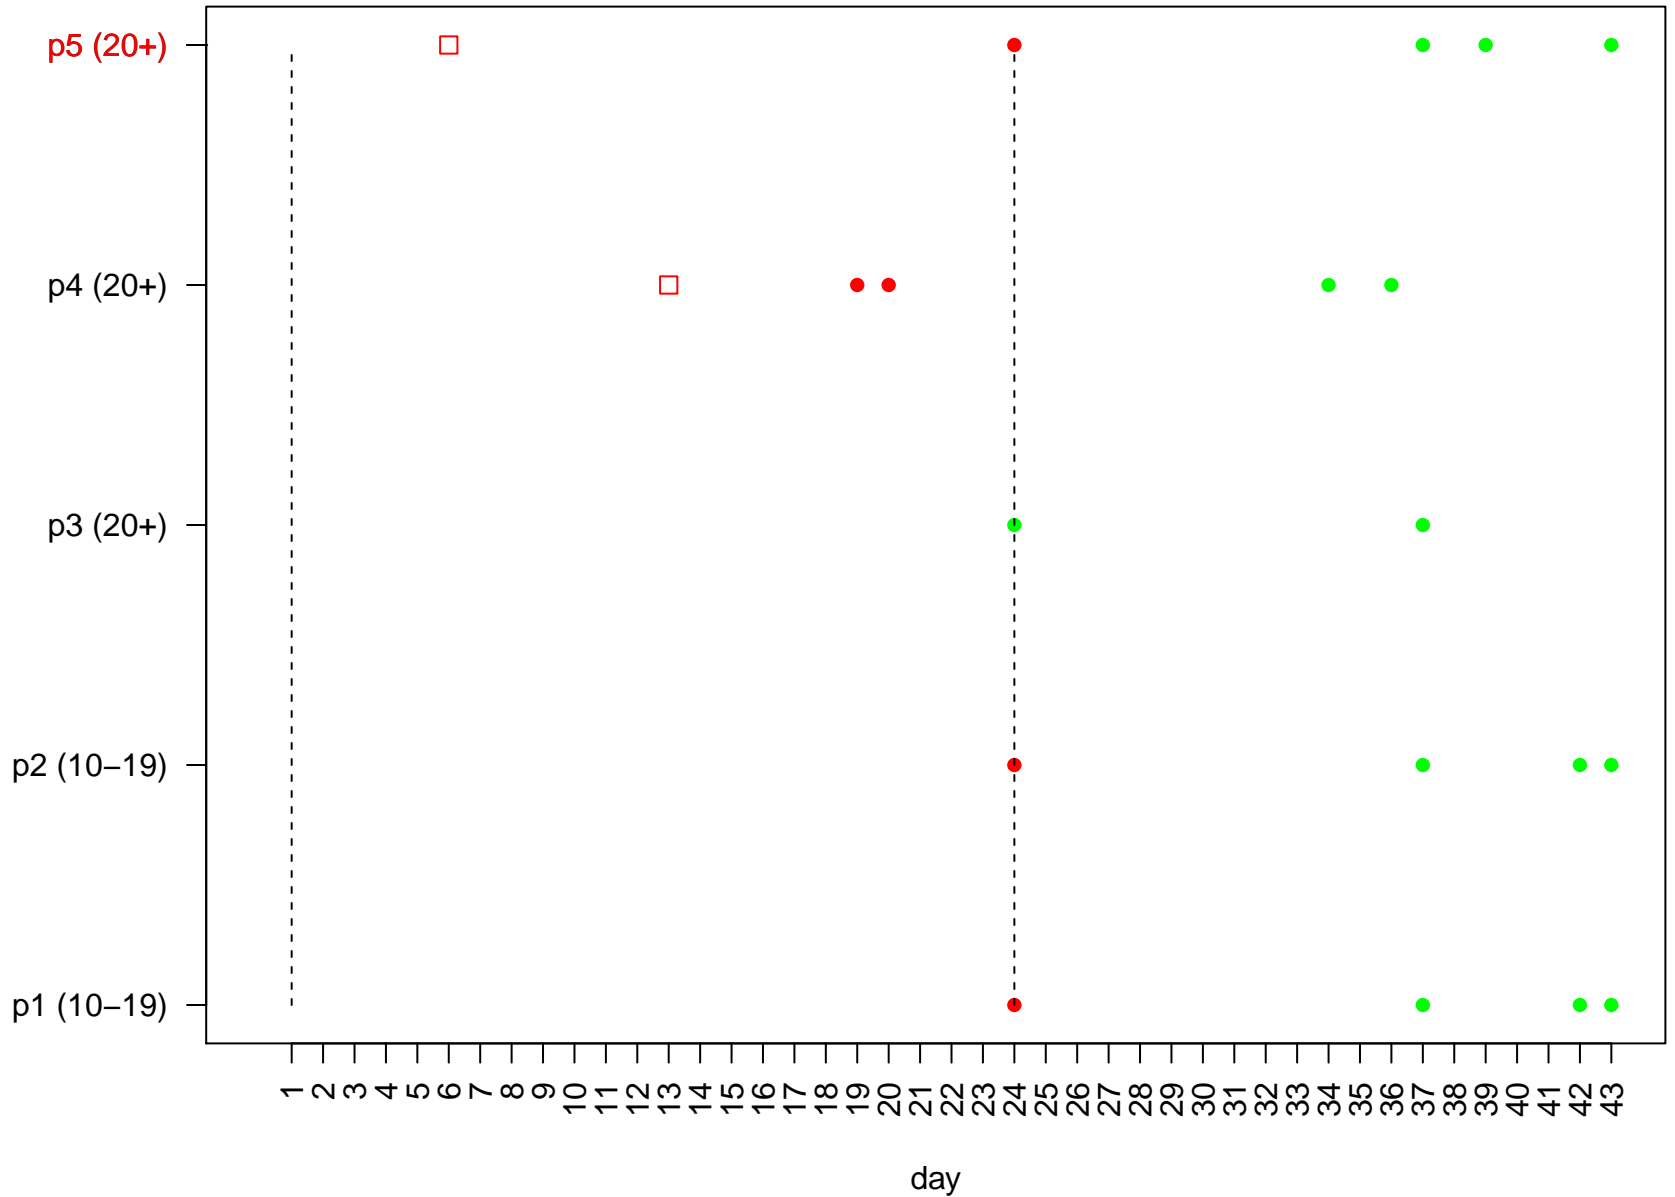

# Household 635

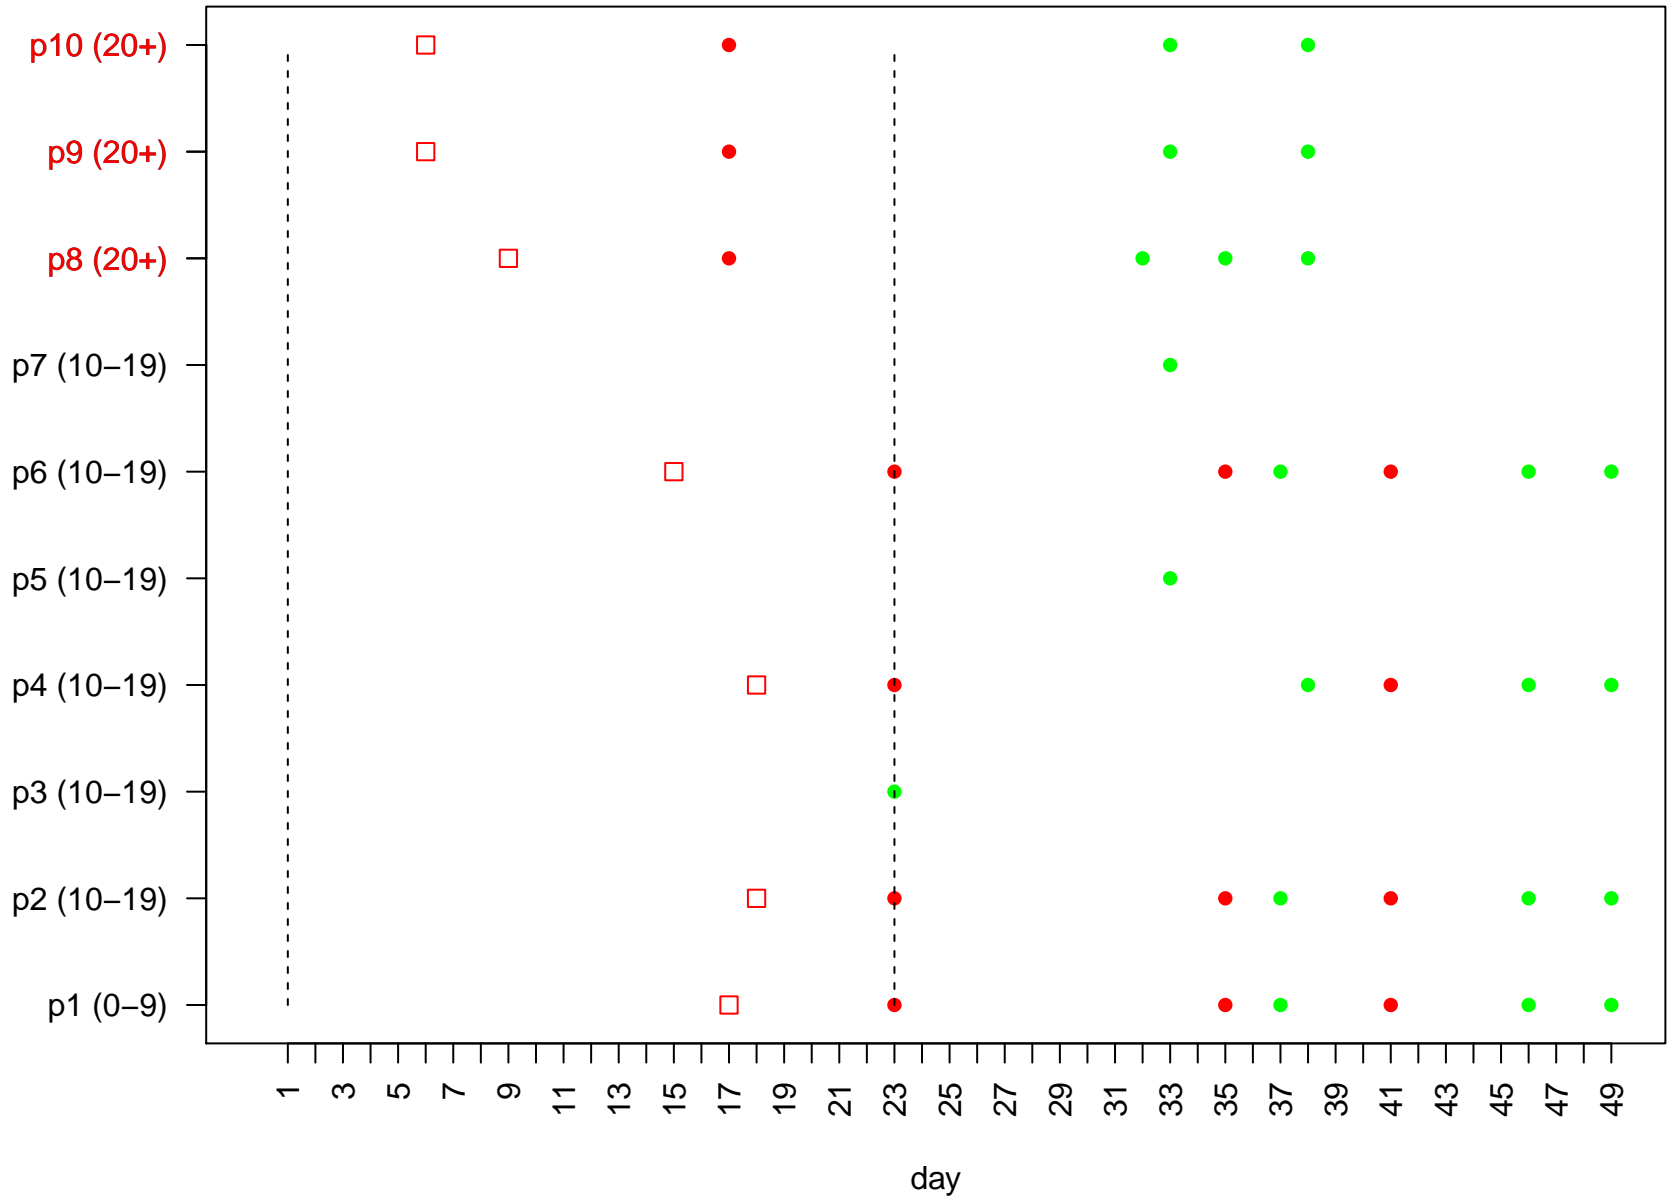

# Household 636

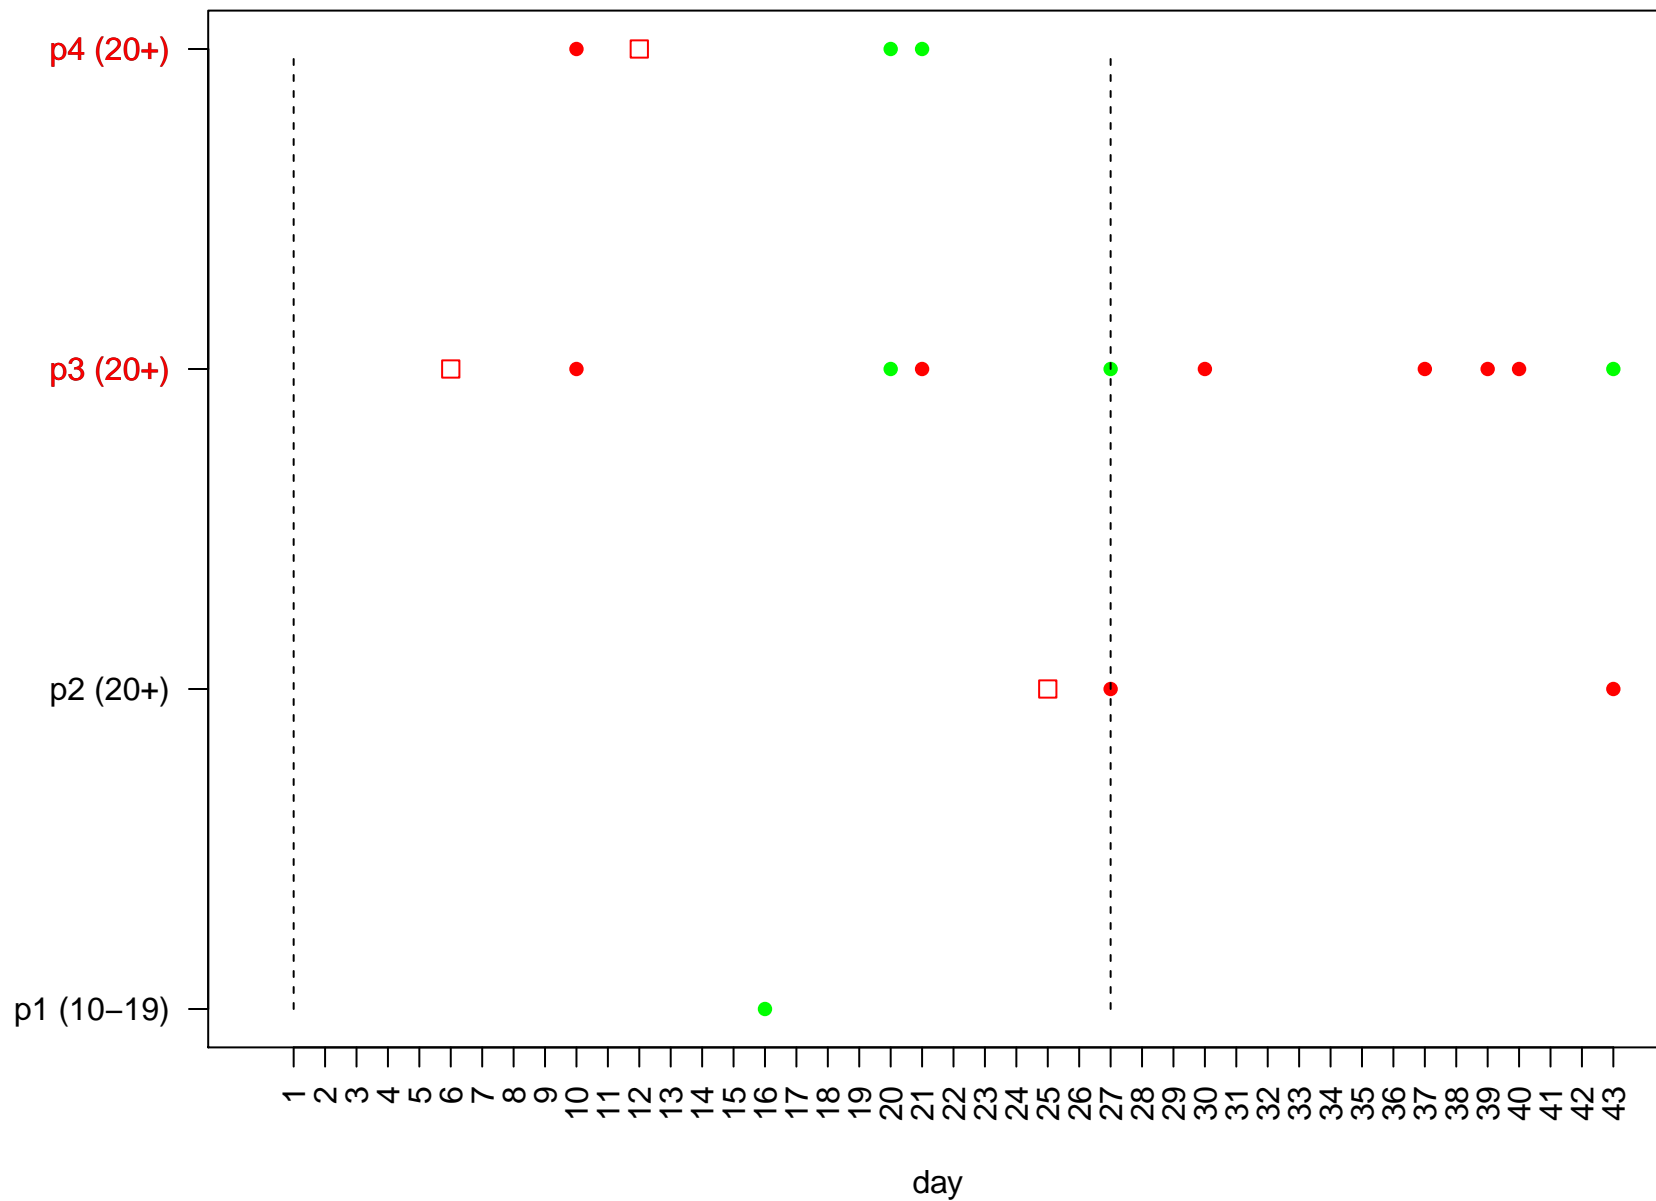

# Household 637

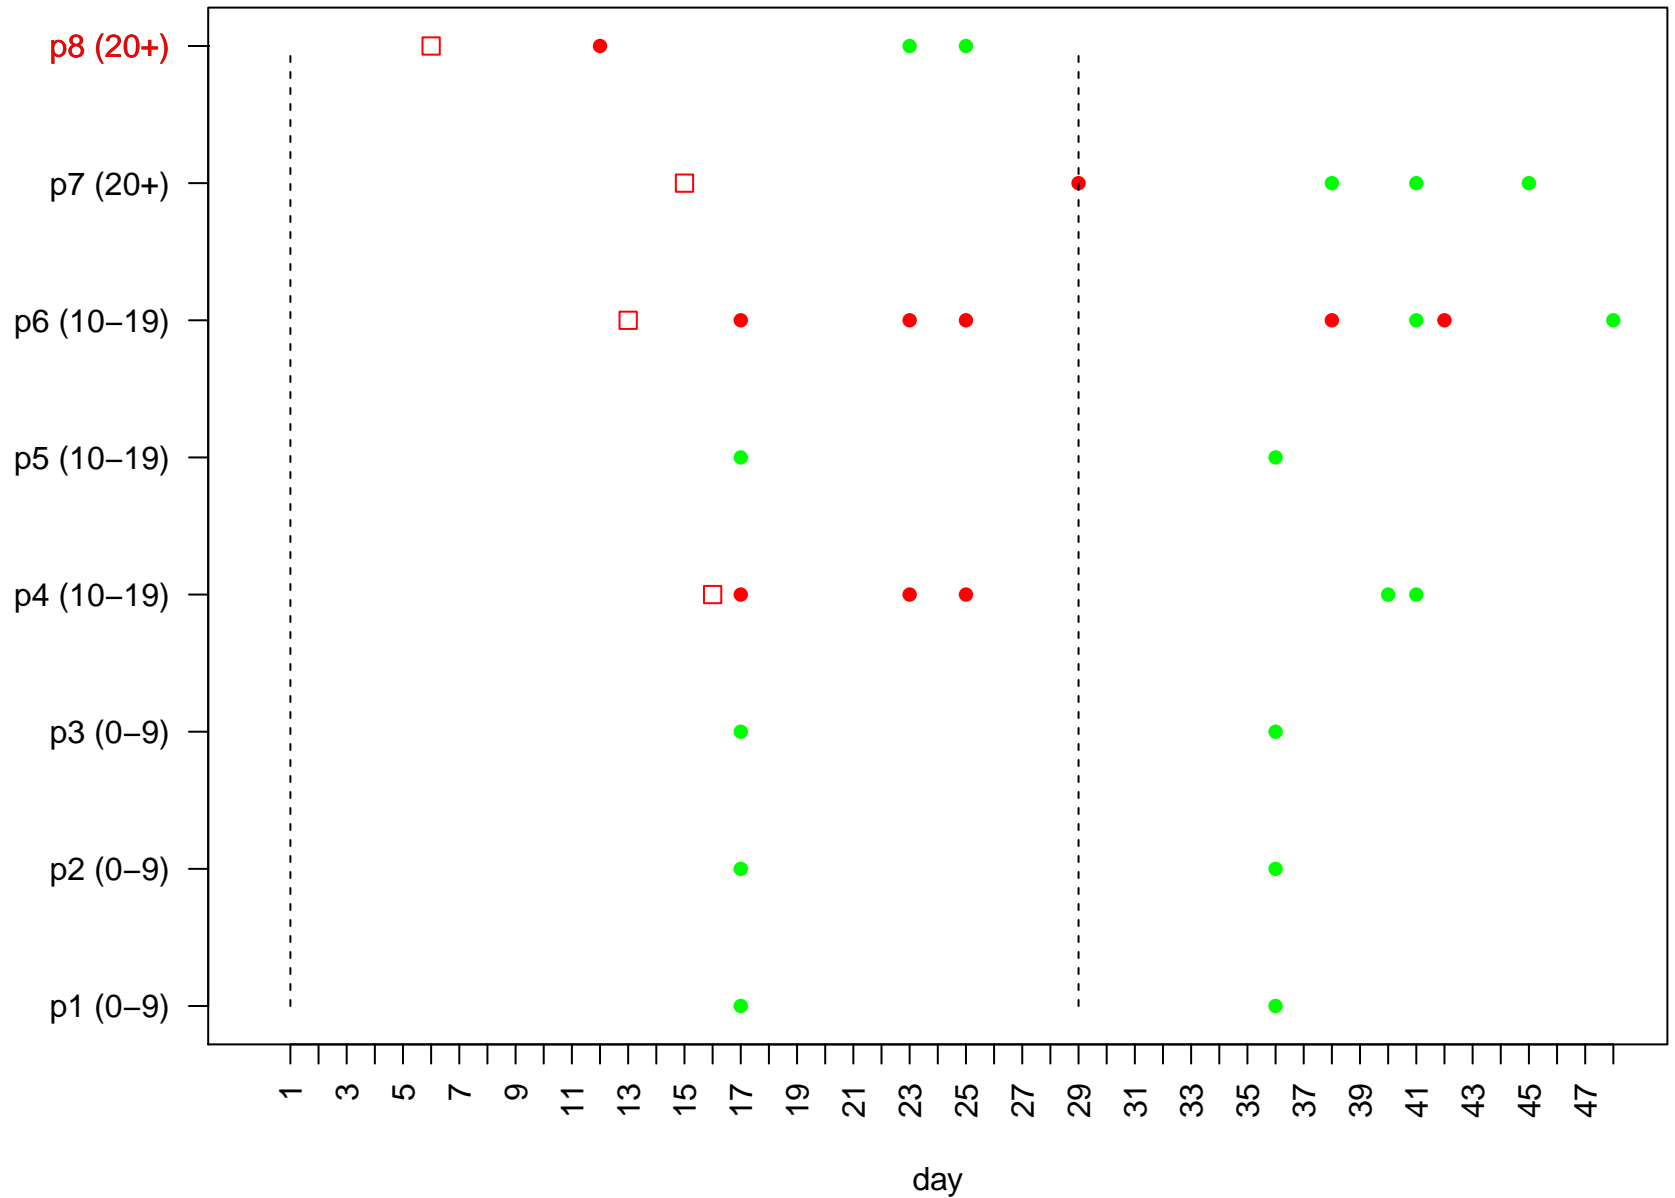

Supplement: pcbi.1008559.s002.pdf [file pcbi.1008559.s002.pdf]
